# Supplementary material for: Comprehending Meningioma Signaling Cascades Using Multipronged Proteomics Approaches & Targeted Validation of Potential Markers
Source: Front Oncol. 2020 Aug 26;10:1600. doi: 10.3389/fonc.2020.01600 (PMC7482667; doi:10.3389/fonc.2020.01600)
Supplement: Supplementary file 2 [file Table_2.xlsx]

## Sheet: Proteins
Checked	Protein FDR Confidence: Combined	Master	Accession	Description	Exp. q-value: Combined	Contaminant	Sum PEP Score	Coverage [%]	# Peptides	# PSMs	# Unique Peptides	# Protein Groups	# AAs	MW [kDa]	calc. pI	Score Mascot: Mascot	Score Sequest HT: Sequest HT	# Peptides (by Search Engine): Mascot	# Peptides (by Search Engine): Sequest HT	Biological Process	Cellular Component	Molecular Function	Pfam IDs	Entrez Gene ID	Ensembl Gene ID	Gene Symbol	Chromosome	KEGG Pathway Accessions	KEGG Pathways	WikiPathways	# Razor Peptides	Abundances (Scaled): F1: Sample	Abundances (Scaled): F2: Sample	Abundances (Scaled): F3: Sample	Abundances (Scaled): F4: Sample	Abundances (Scaled): F5: Sample	Abundances (Scaled): F6: Sample	Abundances (Scaled): F7: Sample	Abundances (Scaled): F8: Sample	Abundances (Scaled): F9: Sample	Abundances (Scaled): F10: Sample	Abundances (Scaled): F11: Sample	Abundances (Scaled): F12: Sample	Abundances (Scaled): F13: Sample	Abundances (Scaled): F14: Sample	Abundances (Scaled): F15: Sample	Abundances (Scaled): F16: Sample	Abundances (Scaled): F17: Sample	Abundances (Scaled): F18: Sample
TRUE	High	Master Protein	Q09666	Neuroblast differentiation-associated protein AHNAK OS=Homo sapiens OX=9606 GN=AHNAK PE=1 SV=2	0	FALSE	3154.17	83	371	12220	370	1	5890	628.7	6.15	224061	18222.1	358	345	cell organization and biogenesis;regulation of biological process	cytoplasm;cytoskeleton;cytosol;membrane;nucleus	protein binding;RNA binding;structural molecule activity		79026	ENSG00000124942.13	AHNAK	11				1	315.1	128.1	34.3	147.9	89.6	130.8	89.9	63.8	130.3	218	80.9	40.9	87.8	49.2	111.1	93.6	100.2	47.5
TRUE	High	Master Protein	Q15149	Plectin OS=Homo sapiens OX=9606 GN=PLEC PE=1 SV=3	0	FALSE	2397.43	64	300	9147	246	1	4684	531.5	5.96	185628	14111.9	297	282	cell organization and biogenesis	cytoplasm;cytoskeleton;cytosol;membrane	protein binding;RNA binding;structural molecule activity	Pf00307, Pf00681, Pf03501, Pf07812	5339	ENSG00000178209.14	PLEC	8				54	231.6	131.4	74.7	124.3	117.9	128.6	65.7	76.7	136.3	212	104	45.7	76.7	32.6	99.6	59.2	71.3	54.2
TRUE	High	Master Protein	Q13813	Spectrin alpha chain, non-erythrocytic 1 OS=Homo sapiens OX=9606 GN=SPTAN1 PE=1 SV=3	0	FALSE	1972.28	76	206	7390	15	1	2472	284.4	5.35	165534	13143.8	198	194	cell organization and biogenesis;cellular component movement;metabolic process;regulation of biological process;response to stimulus;transport	cytoplasm;cytoskeleton;cytosol;extracellular;membrane;organelle lumen	metal ion binding;protein binding;structural molecule activity	Pf00018, Pf00036, Pf00435, Pf07653, Pf08239, Pf08726, Pf13405, Pf13499, Pf14604	6709	ENSG00000197694.15	SPTAN1	9	hsa04530; hsa04210	Tight junction; Apoptosis	Fas Ligand (FasL) pathway and Stress induction of Heat Shock Proteins (HSP) regulation	189	163.2	148	58.5	122.5	77.1	158.1	114.1	98.1	126.4	133	101.5	45.9	99.1	33.9	127	65.8	82.4	57.7
TRUE	High	Master Protein	Q01082	Spectrin beta chain, non-erythrocytic 1 OS=Homo sapiens OX=9606 GN=SPTBN1 PE=1 SV=2	0	FALSE	1483.52	71	171	5201	160	1	2364	274.4	5.57	113961	8843.34	166	154	cell organization and biogenesis;cellular component movement;metabolic process;regulation of biological process;response to stimulus;transport	cytoplasm;cytoskeleton;cytosol;membrane;nucleus	protein binding;RNA binding;structural molecule activity	Pf00169, Pf00307, Pf00435, Pf11971, Pf12128, Pf15410	6711	ENSG00000115306.15	SPTBN1	2			Sudden Infant Death Syndrome (SIDS) Susceptibility Pathways; TGF-beta Signaling Pathway	11	190	167.7	69.2	136.6	81.1	169.1	121.6	116.3	134.1	130.6	123.8	38.7	99.3	36.3	133.7	95.9	99.3	62
TRUE	High	Master Protein	P02768	Serum albumin OS=Homo sapiens OX=9606 GN=ALB PE=1 SV=2	0	TRUE	1451.76	90	99	15959	99	1	609	69.3	6.28	320873	29259.9	98	91	cell communication;cell organization and biogenesis;metabolic process;regulation of biological process;response to stimulus;transport	cytoplasm;endoplasmic reticulum;extracellular;Golgi;nucleus;organelle lumen	antioxidant activity;catalytic activity;DNA binding;metal ion binding;protein binding	Pf00273	213	ENSG00000163631.16	ALB	4	hsa04918	Thyroid hormone synthesis	Vitamin B12 Metabolism; Selenium Micronutrient Network; Folate Metabolism	0	39	54.6	73.7	87.4	78.8	67.5	157.9	145.5	75.6	52.5	64.6	135.9	117	282	45.7	45.9	66	232
TRUE	High	Master Protein	O75369	Filamin-B OS=Homo sapiens OX=9606 GN=FLNB PE=1 SV=2	0	FALSE	1396.96	79	155	5272	144	1	2602	278	5.73	105984	8980.13	153	140	cell differentiation;cell organization and biogenesis;development;regulation of biological process;response to stimulus	cytoplasm;cytoskeleton;cytosol;membrane;nucleus	protein binding;RNA binding	Pf00307, Pf00630	2317	ENSG00000136068.14	FLNB	3	hsa05205; hsa04010; hsa05132; hsa04510	Proteoglycans in cancer; MAPK signaling pathway; Salmonella infection; Focal adhesion	VEGFA-VEGFR2 Signaling Pathway	11	212.6	145.7	61.3	158.3	128.7	140.9	97.8	80.1	120.3	195.8	133.5	52.4	78.8	46.5	164.9	82.2	84.8	68.2
TRUE	High	Master Protein	P35579	Myosin-9 OS=Homo sapiens OX=9606 GN=MYH9 PE=1 SV=4	0	FALSE	1347.34	67	152	5317	125	1	1960	226.4	5.6	129297	9435.03	150	146	cell differentiation;cell organization and biogenesis;cellular component movement;metabolic process;regulation of biological process;response to stimulus;transport	cytoplasm;cytoskeleton;cytosol;extracellular;membrane;nucleus	catalytic activity;motor activity;nucleotide binding;protein binding;RNA binding;transporter activity	Pf00063, Pf01442, Pf01496, Pf01576, Pf01765, Pf02736, Pf03962, Pf04111, Pf04156, Pf05911, Pf06637, Pf07888, Pf09731, Pf11068, Pf11559, Pf12128, Pf13094	4627	ENSG00000100345.20	MYH9	22	hsa04530; hsa04810; hsa05132	Tight junction; Regulation of actin cytoskeleton; Salmonella infection	Primary Focal Segmental Glomerulosclerosis FSGS; VEGFA-VEGFR2 Signaling Pathway	26	119.3	228	90.2	150.4	64.6	95.1	141.3	137.7	169.9	122.9	157.2	117.8	104	44.2	91.3	97.2	103.2	63.7
TRUE	High	Master Protein	P12111	Collagen alpha-3(VI) chain OS=Homo sapiens OX=9606 GN=COL6A3 PE=1 SV=5	0	FALSE	1242.51	54	152	5750	152	1	3177	343.5	6.68	124843	9262.12	148	131	cell organization and biogenesis;metabolic process;regulation of biological process	extracellular;membrane;organelle lumen	enzyme regulator activity;protein binding	Pf00014, Pf00041, Pf00092, Pf01391, Pf13519, Pf13768	1293	ENSG00000163359.15	COL6A3	2	hsa04512; hsa04510; hsa04151; hsa04974	ECM-receptor interaction; Focal adhesion; PI3K-Akt signaling pathway; Protein digestion and absorption	miRNA targets in ECM and membrane receptors	0	78	35.2	167.7	71.3	41	75.2	84.6	55.3	40.7	42.2	74.3	106.9	176.8	80.7	68.8	125.6	146.1	101.3
TRUE	High	Master Protein	Q14204	Cytoplasmic dynein 1 heavy chain 1 OS=Homo sapiens OX=9606 GN=DYNC1H1 PE=1 SV=5	0	FALSE	1226.62	48	182	2631	182	1	4646	532.1	6.4	43858	3737.48	180	164	cell division;cell organization and biogenesis;cellular component movement;regulation of biological process;transport	cytoplasm;cytoskeleton;cytosol;extracellular;membrane;organelle lumen	catalytic activity;motor activity;nucleotide binding;protein binding;RNA binding	Pf00769, Pf03028, Pf03915, Pf04156, Pf07246, Pf07728, Pf08385, Pf08393, Pf12774, Pf12775, Pf12777, Pf12780, Pf12781, Pf13173, Pf13207, Pf13401	1778	ENSG00000197102.10	DYNC1H1	14	hsa05132; hsa04962; hsa04145	Salmonella infection; Vasopressin-regulated water reabsorption; Phagosome		0	129	120.2	92.9	148	100.6	183.8	85.4	93.8	111.2	125.9	122.2	78.1	63.8	50.6	104.2	128	83.7	72.5
TRUE	High	Master Protein	P21333	Filamin-A OS=Homo sapiens OX=9606 GN=FLNA PE=1 SV=4	0	FALSE	1156.67	68	130	4102	119	1	2647	280.6	6.06	80482	6736.09	129	123	cell organization and biogenesis;cellular component movement;metabolic process;regulation of biological process;response to stimulus;transport	cytoplasm;cytoskeleton;cytosol;extracellular;membrane;nucleus	protein binding;RNA binding;signal transducer activity	Pf00307, Pf00630	2316	ENSG00000196924.14	FLNA	X	hsa04010; hsa05205; hsa05132; hsa04510	MAPK signaling pathway; Proteoglycans in cancer; Salmonella infection; Focal adhesion	Prolactin Signaling Pathway; MAPK Signaling Pathway; Androgen receptor signaling pathway; Hypothesized Pathways in Pathogenesis of Cardiovascular Disease; IL-4 Signaling Pathway; Focal Adhesion	3	108.2	115.8	71.9	85.9	51.7	168.3	59.9	69.6	109.7	110.7	84.4	88	131.5	108.7	97.5	67.5	85.2	72.1
TRUE	High	Master Protein	P15924	Desmoplakin OS=Homo sapiens OX=9606 GN=DSP PE=1 SV=3	0	FALSE	1118.68	55	171	3376	171	1	2871	331.6	6.81	68574	5319.55	166	155	cell death;cell differentiation;cell organization and biogenesis;metabolic process;regulation of biological process;response to stimulus;transport	cytoplasm;cytoskeleton;membrane;nucleus	catalytic activity;motor activity;protein binding;RNA binding;structural molecule activity	Pf00038, Pf00681, Pf01540, Pf01576, Pf02463, Pf04111, Pf04156, Pf05483, Pf05557, Pf05622, Pf06008, Pf06160, Pf06637, Pf07888, Pf10174, Pf12072, Pf12128, Pf13166	1832	ENSG00000096696.13	DSP	6	hsa05412	Arrhythmogenic right ventricular cardiomyopathy (ARVC)	Lung fibrosis; Arrhythmogenic Right Ventricular Cardiomyopathy	0	49.6	142.5	55.9	139.3	59.5	120.9	187.9	216.2	174.7	140.1	130.5	48.4	45.9	40	74.7	41.4	160.2	37.7
TRUE	High	Master Protein	A0A0D9SF54	Spectrin alpha chain, non-erythrocytic 1 OS=Homo sapiens OX=9606 GN=SPTAN1 PE=1 SV=1	0	FALSE	1112.89	76	193	3308	14	1	2457	282.7	5.34		13111.9		193	cell organization and biogenesis;cellular component movement;metabolic process;regulation of biological process;response to stimulus;transport	cytoskeleton;cytosol;extracellular;membrane;organelle lumen	metal ion binding;protein binding;structural molecule activity	Pf00018, Pf00036, Pf00435, Pf07653, Pf08239, Pf08726, Pf13405, Pf13499, Pf14604	6709	ENSG00000197694.15	SPTAN1	9			Fas Ligand (FasL) pathway and Stress induction of Heat Shock Proteins (HSP) regulation	0	231.3	211.6	42.4	124.3	121.9	192.6	116.6	106.9	125.4	142.6	149.3	12.2	157.9	18.1	91	19.7	96.3	185
TRUE	High	Master Protein	Q9Y490	Talin-1 OS=Homo sapiens OX=9606 GN=TLN1 PE=1 SV=3	0	FALSE	1075.79	67	121	3651	111	1	2541	269.6	6.07	87371	6484.9	118	109	cell organization and biogenesis;cellular component movement;regulation of biological process;response to stimulus;transport	cell surface;cytoplasm;cytoskeleton;cytosol;extracellular;membrane	protein binding;structural molecule activity	Pf00373, Pf01608, Pf02174, Pf08913, Pf09141, Pf09379	7094	ENSG00000137076.20	TLN1	9	hsa04510; hsa04015; hsa04611; hsa05166	Focal adhesion; Rap1 signaling pathway; Platelet activation; HTLV-I infection	Primary Focal Segmental Glomerulosclerosis FSGS; Integrin-mediated Cell Adhesion; Focal Adhesion	10	158.7	135.6	83.5	171.2	84.8	101.9	84.7	94.8	116.8	145	105.2	99.9	81.5	40.4	79.4	73.6	101.6	43.9
TRUE	High	Master Protein	P98160	Basement membrane-specific heparan sulfate proteoglycan core protein OS=Homo sapiens OX=9606 GN=HSPG2 PE=1 SV=4	0	FALSE	1028.44	47	125	2162	125	1	4391	468.5	6.51	43826	3555.98	123	113	cell differentiation;cell growth;cell organization and biogenesis;defense response;metabolic process;regulation of biological process;response to stimulus;transport	extracellular;membrane;organelle lumen	metal ion binding;protein binding	Pf00008, Pf00047, Pf00052, Pf00053, Pf00054, Pf00057, Pf02210, Pf07679, Pf07686, Pf12785, Pf13385, Pf13895, Pf13927	3339	ENSG00000142798.17	HSPG2	1	hsa04512; hsa05161; hsa05205	ECM-receptor interaction; Hepatitis B; Proteoglycans in cancer		0	57.8	86.7	146.2	94.1	48.9	123.9	121.3	89.1	66.6	43.7	49.9	75.5	140	77.3	45.5	164.2	87.7	57.5
TRUE	High	Master Protein	Q02952	A-kinase anchor protein 12 OS=Homo sapiens OX=9606 GN=AKAP12 PE=1 SV=4	0	FALSE	1008.89	66	92	1699	92	1	1782	191.4	4.41	38196	3705.38	92	85	regulation of biological process;response to stimulus;transport	cytoplasm;cytoskeleton;cytosol;membrane	protein binding	Pf03832	9590	ENSG00000131016.16	AKAP12	6			G Protein Signaling Pathways	0	73.1	173.6	17	228.5	98.2	72.4	260.8	92	82.1	649.8	32.4	27.3	18.4	8.4	45.2	24	49.5	17.9
TRUE	High	Master Protein	P08670	Vimentin OS=Homo sapiens OX=9606 GN=VIM PE=1 SV=4	0	FALSE	999.876	95	80	22970	68	1	466	53.6	5.12	587593	47630.3	78	78	cell differentiation;cell organization and biogenesis;cellular component movement;metabolic process;regulation of biological process;response to stimulus	cytoplasm;cytoskeleton;cytosol;membrane	protein binding;RNA binding;structural molecule activity	Pf00038, Pf04111, Pf04156, Pf04732, Pf05622, Pf10186	7431	ENSG00000026025.15	VIM	10	hsa05206; hsa05169	MicroRNAs in cancer; Epstein-Barr virus infection	TGF-B Signaling in Thyroid Cells for Epithelial-Mesenchymal Transition; Spinal Cord Injury; Apoptosis-related network due to altered Notch3 in ovarian cancer; T-Cell antigen Receptor (TCR) Signaling Pathway; Primary Focal Segmental Glomerulosclerosis FSGS; Allograft Rejection; Striated Muscle Contraction	13	94.6	187.4	248.6	92.5	180.1	69.8	196.4	204.3	285.6	74.5	182.3	21.4	96.6	36.1	59.8	6.8	133.8	79.2
TRUE	High	Master Protein	Q00610	Clathrin heavy chain 1 OS=Homo sapiens OX=9606 GN=CLTC PE=1 SV=5	0	FALSE	974.621	69	98	3985	80	1	1675	191.5	5.69	87625	6668.53	97	90	cell differentiation;cell division;cell organization and biogenesis;cellular component movement;metabolic process;regulation of biological process;response to stimulus;transport	cytoplasm;cytoskeleton;cytosol;endosome;membrane;vacuole	protein binding;RNA binding;structural molecule activity	Pf00637, Pf01394, Pf04053, Pf09268, Pf13838	1213	ENSG00000141367.11	CLTC	17	hsa04721; hsa04142; hsa04961; hsa04144; hsa05100; hsa05016	Synaptic vesicle cycle; Lysosome; Endocrine and other factor-regulated calcium reabsorption; Endocytosis; Bacterial invasion of epithelial cells; Huntington's disease	VEGFA-VEGFR2 Signaling Pathway; Synaptic Vesicle Pathway; Complement and Coagulation Cascades	18	127.4	139.4	76.5	214.9	71.8	158.3	79.4	86.3	152.1	142.1	115.8	70.3	62.2	25.5	135.9	159	49.1	40.2
TRUE	High	Master Protein	P02751	Fibronectin OS=Homo sapiens OX=9606 GN=FN1 PE=1 SV=4	0	FALSE	969.447	56	93	3874	87	1	2386	262.5	5.71	84582	7050.44	90	88	cell differentiation;cell organization and biogenesis;cellular component movement;defense response;metabolic process;regulation of biological process;response to stimulus;transport	extracellular;membrane;organelle lumen	enzyme regulator activity;protein binding	Pf00039, Pf00040, Pf00041	2335	ENSG00000115414.18	FN1	2	hsa05200; hsa05100; hsa04933; hsa05222; hsa04510; hsa04512; hsa05205; hsa04151; hsa05146; hsa04810	Pathways in cancer; Bacterial invasion of epithelial cells; AGE-RAGE signaling pathway in diabetic complications; Small cell lung cancer; Focal adhesion; ECM-receptor interaction; Proteoglycans in cancer; PI3K-Akt signaling pathway; Amoebiasis; Regulation of actin cytoskeleton	Rac1/Pak1/p38/MMP-2 pathway; miRNA targets in ECM and membrane receptors; Inflammatory Response Pathway; Focal Adhesion; miR-509-3p alteration of YAP1/ECM axis; TGF-B Signaling in Thyroid Cells for Epithelial-Mesenchymal Transition; Simplified Interaction Map Between LOXL4 and Oxidative Stress Pathway; Overview of nanoparticle effects; Senescence and Autophagy in Cancer; TGF-beta Signaling Pathwa…	6	100.1	187	300.6	91.3	24.7	152.5	276.4	55.1	106.3	239.3	60.1	42.2	96.4	42.6	72	40.3	86.8	44.4
TRUE	High	Master Protein	P01024	Complement C3 OS=Homo sapiens OX=9606 GN=C3 PE=1 SV=2	0	FALSE	929.755	71	112	2757	111	1	1663	187	6.4	52955	4349.75	110	97	cell organization and biogenesis;defense response;metabolic process;regulation of biological process;response to stimulus;transport	extracellular;membrane;organelle lumen	catalytic activity;enzyme regulator activity;protein binding	Pf00207, Pf01759, Pf01821, Pf01835, Pf07677, Pf07678, Pf07703, Pf10569, Pf11974	718	ENSG00000125730.16	C3	19	hsa05142; hsa05150; hsa04610; hsa05152; hsa05203; hsa05168; hsa04145; hsa05140; hsa05134; hsa05322; hsa05133	Chagas disease (American trypanosomiasis); Staphylococcus aureus infection; Complement and coagulation cascades; Tuberculosis; Viral carcinogenesis; Herpes simplex infection; Phagosome; Leishmaniasis; Legionellosis; Systemic lupus erythematosus; Pertussis	Allograft Rejection; Complement Activation; TYROBP Causal Network; Complement and Coagulation Cascades	2	28	30.7	135.9	41.4	71.6	58.5	58.1	98.9	51.1	61.6	73.2	228.2	100.8	122.2	68.9	48.1	59.1	175
TRUE	High	Master Protein	P35555	Fibrillin-1 OS=Homo sapiens OX=9606 GN=FBN1 PE=1 SV=3	0	FALSE	876.151	48	97	3430	74	1	2871	312	4.93	73245	5600.25	93	90	cell organization and biogenesis;metabolic process;regulation of biological process;response to stimulus	cell surface;extracellular;membrane;organelle lumen	metal ion binding;protein binding;structural molecule activity	Pf00683, Pf06247, Pf07645, Pf12662, Pf12947, Pf14670	2200		FBN1	15			Hypothesized Pathways in Pathogenesis of Cardiovascular Disease	24	230.9	32.3	74.1	138.1	52.1	422.9	16.8	24	51.3	142.7	61.7	66.5	69.4	24.8	146.2	29.3	120.3	29.7
TRUE	High	Master Protein	Q07954	Prolow-density lipoprotein receptor-related protein 1 OS=Homo sapiens OX=9606 GN=LRP1 PE=1 SV=2	0	FALSE	863.222	35	119	1809	115	1	4544	504.3	5.39	35488	2826.69	117	104	cell proliferation;development;metabolic process;regulation of biological process;response to stimulus;transport	cytoplasm;cytosol;endosome;membrane;nucleus	metal ion binding;protein binding;receptor activity;RNA binding;transporter activity	Pf00057, Pf00058, Pf07645, Pf12662, Pf14670	4035	ENSG00000123384.13	LRP1	12	hsa05144; hsa05010	Malaria; Alzheimer's disease	Regulation of Wnt/B-catenin Signaling by Small Molecule Compounds; Statin Pathway; Alzheimers Disease	3	143.8	143.6	53.5	161.2	114.2	199	98.1	97.2	154.7	156.8	165.5	81.1	89.5	37.7	130.1	97	89.5	70.3
TRUE	High	Master Protein	P35580	Myosin-10 OS=Homo sapiens OX=9606 GN=MYH10 PE=1 SV=3	0	FALSE	784.027	53	102	1756	76	1	1976	228.9	5.54	40192	2972.75	100	96	cell organization and biogenesis;cellular component movement;metabolic process;regulation of biological process;transport	cytoplasm;cytosol;nucleus	catalytic activity;motor activity;nucleotide binding;protein binding;transporter activity	Pf00063, Pf00769, Pf01496, Pf01576, Pf02736, Pf04111, Pf05622, Pf05911, Pf06637, Pf07888, Pf09726, Pf12128, Pf13094, Pf13514	4628	ENSG00000133026.12	MYH10	17	hsa05132; hsa04810; hsa04530	Salmonella infection; Regulation of actin cytoskeleton; Tight junction	Regulation of Actin Cytoskeleton	6	197.8	133.7	75	101.8	84.5	133.3	96.9	50.7	79.5	137.9	98	70.9	143.9	67.9	51.6	194	54.8	81.7
TRUE	High	Master Protein	P78527	DNA-dependent protein kinase catalytic subunit OS=Homo sapiens OX=9606 GN=PRKDC PE=1 SV=3	0	FALSE	780.071	40	143	1321	143	1	4128	468.8	7.12	25323	1692.12	140	112	cell death;cell differentiation;cell organization and biogenesis;cell proliferation;defense response;metabolic process;regulation of biological process;response to stimulus	cytosol;membrane;nucleus	catalytic activity;DNA binding;nucleotide binding;protein binding;RNA binding	Pf00454, Pf02259, Pf02260, Pf08163	5591	ENSG00000253729.7	PRKDC	8	hsa03450; hsa04110	Non-homologous end-joining; Cell cycle	ATM Signaling Network in Development and Disease; miRNA Regulation of DNA Damage Response; Non-homologous end joining; Fas Ligand (FasL) pathway and Stress induction of Heat Shock Proteins (HSP) regulation; Pathways Affected in Adenoid Cystic Carcinoma; DNA Damage Response; Retinoblastoma (RB) in Cancer; Cell Cycle	0	62.5	102.3	39.9	101.8	68	79.3	56	51	82.2	86.4	69.5	160.1	54.9	17.2	139	218.2	355.4	41.1
TRUE	High	Master Protein	P02787	Serotransferrin OS=Homo sapiens OX=9606 GN=TF PE=1 SV=3	0	FALSE	779.46	82	69	4167	69	1	698	77	7.12	88021	7240.18	69	64	cell organization and biogenesis;cellular homeostasis;metabolic process;regulation of biological process;response to stimulus;transport	cell surface;endosome;extracellular;membrane;organelle lumen	enzyme regulator activity;metal ion binding;protein binding;transporter activity	Pf00405, Pf12974	7018	ENSG00000091513.14	TF	3	hsa04066; hsa04978	HIF-1 signaling pathway; Mineral absorption	Differentiation Pathway; Sudden Infant Death Syndrome (SIDS) Susceptibility Pathways; Iron metabolism in placenta	0	36.9	63.1	80.5	87.5	71.8	77.2	184.4	182.6	73.8	77.3	130.2	98.2	103.9	374.5	44.6	52.3	59.8	204.9
TRUE	High	Master Protein	P04114	Apolipoprotein B-100 OS=Homo sapiens OX=9606 GN=APOB PE=1 SV=2	0	FALSE	775.23	38	138	878	138	1	4563	515.3	7.05	15232	1126.11	133	110	cell organization and biogenesis;cellular component movement;metabolic process;regulation of biological process;response to stimulus;transport	cytoplasm;cytosol;endoplasmic reticulum;endosome;extracellular;membrane;organelle lumen	protein binding;transporter activity	Pf01347, Pf04286, Pf06448, Pf09172, Pf12491	338		APOB	2	hsa04975; hsa04977	Fat digestion and absorption; Vitamin digestion and absorption	Statin Pathway; Selenium Micronutrient Network; Vitamin B12 Metabolism; Folate Metabolism	0	84.2	132.6	70.9	51.5	49	92.3	48.1	52	45.1	40.1	96.4	114.6	75.9	140.3	50.8	75.5	105.4	175.4
TRUE	High	Master Protein	P02549	Spectrin alpha chain, erythrocytic 1 OS=Homo sapiens OX=9606 GN=SPTA1 PE=1 SV=5	0	FALSE	738.387	53	99	635	99	1	2419	279.8	5.05	13488	920.64	99	85	cell organization and biogenesis;cellular component movement;metabolic process;regulation of biological process;response to stimulus;transport	cytoplasm;cytoskeleton;cytosol;membrane	metal ion binding;protein binding;structural molecule activity	Pf00018, Pf00435, Pf07653, Pf08726, Pf14604	6708	ENSG00000163554.12	SPTA1	1	hsa04210	Apoptosis		0	19.7	125	77.3	57.7	100	51.9	29.8	64.4	64.2	52.7	138.8	107.6	29.9	31.7	94.6	73.1	124.9	39.1
TRUE	High	Master Protein	P0C0L5	Complement C4-B OS=Homo sapiens OX=9606 GN=C4B PE=1 SV=2	0	FALSE	686.006	58	83	1563	13	1	1744	192.6	7.27	33951	2478.91	80	73	defense response;metabolic process;regulation of biological process;response to stimulus	extracellular;membrane	catalytic activity;enzyme regulator activity;protein binding	Pf00207, Pf01759, Pf01821, Pf01835, Pf07677, Pf07678, Pf07703, Pf10569, Pf11974, Pf13249	721; 100293534	ENSG00000224389.8; ENSG00000228267.8	C4B; C4B_2; LOC100293534	6; CHR_HSCHR6_MHC_COX_CTG1	hsa05150; hsa05133; hsa04610; hsa05322	Staphylococcus aureus infection; Pertussis; Complement and coagulation cascades; Systemic lupus erythematosus	Oxidative Damage; Sudden Infant Death Syndrome (SIDS) Susceptibility Pathways; Complement Activation; Allograft Rejection; Complement and Coagulation Cascades	67	23.4	45.9	140.1	54.4	79.8	56	60.7	72.3	119.4	42.4	87	108.2	124	176.8	81.7	47.3	86.3	111.9
TRUE	High	Master Protein	P35749	Myosin-11 OS=Homo sapiens OX=9606 GN=MYH11 PE=1 SV=3	0	FALSE	666.469	45	94	1049	74	1	1972	227.2	5.5	24556	1617.36	93	76	cell organization and biogenesis;metabolic process;transport	cytoskeleton;cytosol;extracellular	catalytic activity;motor activity;nucleotide binding;protein binding;structural molecule activity	Pf00038, Pf00063, Pf01442, Pf01576, Pf02463, Pf02736, Pf04111, Pf04156, Pf05622, Pf06160, Pf07888, Pf09311, Pf09726, Pf09731, Pf10079, Pf12128, Pf12252, Pf12325, Pf13166	4629	ENSG00000133392.17; ENSG00000276480.5	MYH11	16; CHR_HSCHR16_1_CTG1	hsa04270; hsa04530	Vascular smooth muscle contraction; Tight junction		0	21.9	22	29.4	40.8	30.6	25.7	29	59.5	25.9	34.8	86.9	56.8	118.4	69	63.1	72.4	86.6	44
TRUE	High	Master Protein	P69905	Hemoglobin subunit alpha OS=Homo sapiens OX=9606 GN=HBA1 PE=1 SV=2	0	FALSE	663.938	99	25	12078	24	1	142	15.2	8.68	272218	17462.4	25	22	cell organization and biogenesis;metabolic process;regulation of biological process;response to stimulus;transport	cytosol;extracellular;membrane;organelle lumen	antioxidant activity;catalytic activity;metal ion binding;protein binding;transporter activity	Pf00042	3040; 3039	ENSG00000206172.8; ENSG00000188536.12	HBA2; HBA1	16	hsa05143; hsa05144	African trypanosomiasis; Malaria	Vitamin B12 Metabolism; Selenium Micronutrient Network; Effects of Nitric Oxide; Folate Metabolism	1	31	30.7	45.1	10.2	80.8	99.4	72.9	65.6	19.3	41.3	105.6	145	97.5	86.5	147.5	151.2	132.7	113.8
TRUE	High	Master Protein	O43707	Alpha-actinin-4 OS=Homo sapiens OX=9606 GN=ACTN4 PE=1 SV=2	0	FALSE	639.422	74	67	2529	34	1	911	104.8	5.44	52214	4090.19	65	64	cell organization and biogenesis;cellular component movement;regulation of biological process;response to stimulus;transport	cytoplasm;cytoskeleton;cytosol;extracellular;nucleus;organelle lumen	DNA binding;metal ion binding;protein binding;RNA binding	Pf00307, Pf00435, Pf08726, Pf11971, Pf13499	81	ENSG00000282844.1; ENSG00000130402.11	ACTN4	19; CHR_HG26_PATCH	hsa04810; hsa04530; hsa05203; hsa05322; hsa04520; hsa05412; hsa04670; hsa04510; hsa05146	Regulation of actin cytoskeleton; Tight junction; Viral carcinogenesis; Systemic lupus erythematosus; Adherens junction; Arrhythmogenic right ventricular cardiomyopathy (ARVC); Leukocyte transendothelial migration; Focal adhesion; Amoebiasis	Arrhythmogenic Right Ventricular Cardiomyopathy; Primary Focal Segmental Glomerulosclerosis FSGS; Striated Muscle Contraction	33	124.5	113.4	59.8	116.4	58.7	143.2	70.1	56.4	132.4	106.2	80.5	105.8	108.5	218.7	61.1	165.4	66.6	58.7
TRUE	High	Master Protein	Q9Y4G6	Talin-2 OS=Homo sapiens OX=9606 GN=TLN2 PE=1 SV=4	0	FALSE	630.914	53	83	1162	73	1	2542	271.4	5.57	22970	1904.28	82	74	cell organization and biogenesis	cytoplasm;cytoskeleton;membrane	protein binding;structural molecule activity	Pf00373, Pf01608, Pf02174, Pf08913, Pf09141, Pf09379	83660	ENSG00000171914.16	TLN2	15	hsa04015; hsa04510; hsa04611; hsa05166	Rap1 signaling pathway; Focal adhesion; Platelet activation; HTLV-I infection		0	183.1	210.1	114.1	183.5	161.7	130.4	110.9	137.7	178.5	155	196.5	47.2	63.6	38.7	64.3	70.7	130.3	51.1
TRUE	High	Master Protein	P46821	Microtubule-associated protein 1B OS=Homo sapiens OX=9606 GN=MAP1B PE=1 SV=2	0	FALSE	601.47	45	75	1232	72	1	2468	270.5	4.81	23314	2059.09	73	73	cell growth;cell organization and biogenesis;cellular component movement;regulation of biological process;transport	cytoplasm;cytoskeleton;cytosol;membrane	protein binding;structural molecule activity		4131	ENSG00000131711.14	MAP1B	5			Regulation of Microtubule Cytoskeleton	3	120.6	40.9	58.4	112.7	204.4	503.6	66.4	54.7	78	181.4	131.9	65.2	115.2	70.1	104.7	111.8	76.9	112.4
TRUE	High	Master Protein	P46940	Ras GTPase-activating-like protein IQGAP1 OS=Homo sapiens OX=9606 GN=IQGAP1 PE=1 SV=1	0	FALSE	597.967	55	78	1459	75	1	1657	189.1	6.48	29255	2308.93	78	71	cell growth;regulation of biological process;response to stimulus;transport	cytoplasm;cytoskeleton;cytosol;membrane;nucleus	enzyme regulator activity;metal ion binding;protein binding	Pf00307, Pf00397, Pf00616, Pf03836, Pf11016	8826	ENSG00000140575.12	IQGAP1	15	hsa04520; hsa04810; hsa05205	Adherens junction; Regulation of actin cytoskeleton; Proteoglycans in cancer	G13 Signaling Pathway; Regulation of Actin Cytoskeleton; VEGFA-VEGFR2 Signaling Pathway; EGF/EGFR Signaling Pathway	3	169.4	139.1	78.7	137.4	96	118.3	75.2	74.9	100.3	105.2	109.8	107.1	74.4	39.7	106.9	86.5	55.6	48.1
TRUE	High	Master Protein	P01023	Alpha-2-macroglobulin OS=Homo sapiens OX=9606 GN=A2M PE=1 SV=3	0	FALSE	590.68	61	66	1777	66	1	1474	163.2	6.46	30546	2840.63	64	64	cell differentiation;cell organization and biogenesis;metabolic process;regulation of biological process;response to stimulus;transport	cytosol;extracellular;organelle lumen	enzyme regulator activity;protein binding	Pf00207, Pf01835, Pf07677, Pf07678, Pf07703, Pf10569, Pf11974, Pf13249	2	ENSG00000175899.14	A2M	12	hsa04610	Complement and coagulation cascades	Complement and Coagulation Cascades	0	34.8	40.9	68.4	51.7	109.3	73.3	65.8	65	43.3	45.4	69.7	255.1	108.8	193.2	93.5	90.5	58.3	208.2
TRUE	High	Master Protein	P11277	Spectrin beta chain, erythrocytic OS=Homo sapiens OX=9606 GN=SPTB PE=1 SV=5	0	FALSE	588.98	56	86	711	54	1	2137	246.3	5.27	12799	977.55	86	77	cell organization and biogenesis;cellular component movement;metabolic process;regulation of biological process;response to stimulus;transport	cell surface;cytoplasm;cytoskeleton;cytosol;Golgi	protein binding;structural molecule activity	Pf00307, Pf00435, Pf11971	6710	ENSG00000070182.19	SPTB	14				27	66.2	56.6	76.2	24.1	57.1	85	33	45.8	27.1	58	76.5	111.8	69.6	50.3	107.9	88.7	128.9	106.3
TRUE	High	Master Protein	Q14315	Filamin-C OS=Homo sapiens OX=9606 GN=FLNC PE=1 SV=3	0	FALSE	579.302	48	87	1364	76	1	2725	290.8	5.97	25194	2152.92	83	76	cell organization and biogenesis	cytoplasm;cytoskeleton;cytosol;membrane	protein binding	Pf00307, Pf00630	2318	ENSG00000128591.15	FLNC	7	hsa04510; hsa05205; hsa04010; hsa05132	Focal adhesion; Proteoglycans in cancer; MAPK signaling pathway; Salmonella infection		0	132.3	171.1	84.2	219.5	168.7	98.7	66.3	75.6	113	73.3	116.9	41.3	58.1	27.7	98	29.3	98.6	48.3
TRUE	High	Master Protein	Q05707	Collagen alpha-1(XIV) chain OS=Homo sapiens OX=9606 GN=COL14A1 PE=1 SV=3	0	FALSE	555.612	54	78	1356	78	1	1796	193.4	5.3	26760	1998.07	75	62	cell organization and biogenesis	extracellular;organelle lumen	protein binding;RNA binding;structural molecule activity	Pf00041, Pf00092, Pf01391, Pf13519	7373	ENSG00000187955.11	COL14A1	8	hsa04974	Protein digestion and absorption		0	35.8	30.2	71.1	17.5	18.8	27.5	94.6	52.9	17.6	10.8	32.7	134	543.8	255.3	29	107.4	34.3	304
TRUE	High	Master Protein	Q99715	Collagen alpha-1(XII) chain OS=Homo sapiens OX=9606 GN=COL12A1 PE=1 SV=2	0	FALSE	545.693	38	94	859	94	1	3063	332.9	5.53	16340	1145.34	89	82	cell differentiation;cell organization and biogenesis;metabolic process	extracellular;organelle lumen	protein binding;structural molecule activity	Pf00041, Pf00092, Pf13519	1303	ENSG00000111799.20	COL12A1	6	hsa04974	Protein digestion and absorption		0	51	41.9	51.1	38.2	24.2	19.7	20.8	27.4	30.9	43.2	33.5	243.5	130.1	238.6	45.1	86.3	42.2	228.4
TRUE	High	Master Protein	P12814	Alpha-actinin-1 OS=Homo sapiens OX=9606 GN=ACTN1 PE=1 SV=2	0	FALSE	542.755	75	63	2274	37	1	892	103	5.41	46982	3450.76	60	60	cell differentiation;cell organization and biogenesis;regulation of biological process;transport	cytoplasm;cytoskeleton;cytosol;extracellular;membrane;organelle lumen	metal ion binding;protein binding;RNA binding	Pf00036, Pf00307, Pf00435, Pf08726, Pf11971, Pf13405, Pf13499	87	ENSG00000072110.13	ACTN1	14	hsa04530; hsa05203; hsa05322; hsa04520; hsa05412; hsa04810; hsa04670; hsa04510; hsa05146	Tight junction; Viral carcinogenesis; Systemic lupus erythematosus; Adherens junction; Arrhythmogenic right ventricular cardiomyopathy (ARVC); Regulation of actin cytoskeleton; Leukocyte transendothelial migration; Focal adhesion; Amoebiasis	Arrhythmogenic Right Ventricular Cardiomyopathy; Regulation of Actin Cytoskeleton; Focal Adhesion	2	120.5	121.5	70.4	70.6	69.5	99.3	73.4	72.5	108.7	108.4	104.5	178.5	142.5	155.2	97.3	139.6	87.5	94.3
TRUE	High	Master Protein	P02675	Fibrinogen beta chain OS=Homo sapiens OX=9606 GN=FGB PE=1 SV=2	0	FALSE	539.067	77	49	2381	49	1	491	55.9	8.27	51513	4257.96	49	44	cell organization and biogenesis;coagulation;defense response;metabolic process;regulation of biological process;response to stimulus;transport	cell surface;cytoplasm;extracellular;membrane;organelle lumen	protein binding;structural molecule activity	Pf00147, Pf08702	2244	ENSG00000171564.11	FGB	4	hsa04611; hsa04610	Platelet activation; Complement and coagulation cascades	Blood Clotting Cascade; Complement and Coagulation Cascades; VEGFA-VEGFR2 Signaling Pathway	0	98.8	24.3	157.8	7.8	101.2	37.6	46.1	78.2	16.7	42.2	140.3	158.8	26.8	81.5	556	37.7	234.1	131.4
TRUE	High	Master Protein	P07355	Annexin A2 OS=Homo sapiens OX=9606 GN=ANXA2 PE=1 SV=2	0	FALSE	532.064	88	52	6042	52	1	339	38.6	7.75	139747	10697.4	51	45	cell organization and biogenesis;metabolic process;regulation of biological process;response to stimulus;transport	cell surface;cytoplasm;cytosol;endoplasmic reticulum;endosome;extracellular;membrane;nucleus;organelle lumen	enzyme regulator activity;metal ion binding;protein binding;RNA binding	Pf00191	302	ENSG00000182718.16	ANXA2	15			Prostaglandin Synthesis and Regulation	0	199.6	113.5	66.4	153.4	89.6	125.5	141.9	90.7	143.2	214	182.9	41.2	100.6	53.9	210.7	9.2	85.2	51
TRUE	High	Master Protein	K7EMP8	Glial fibrillary acidic protein OS=Homo sapiens OX=9606 GN=GFAP PE=1 SV=2	0	FALSE	529.826	84	54	1486	47	1	432	49.9	5.52	34084	2446.06	52	50	cell differentiation;cell organization and biogenesis;regulation of biological process;response to stimulus;transport	cytoplasm;cytoskeleton;cytosol;membrane;vacuole	catalytic activity;motor activity;protein binding;structural molecule activity;transporter activity	Pf00038, Pf01496, Pf01576, Pf04732, Pf05761, Pf12128, Pf13270	2670	ENSG00000131095.12	GFAP	17	hsa04630	Jak-STAT signaling pathway	Spinal Cord Injury; Neural Crest Differentiation	5	7.4	4.3	9.5	5.2	569.2	7.4	4.1	1077.6	4	8.9	16.2	6.8	13	7.5	7.2	94.6	30.4	231.4
TRUE	High	Master Protein	P35556	Fibrillin-2 OS=Homo sapiens OX=9606 GN=FBN2 PE=1 SV=3	0	FALSE	529.164	31	64	942	56	1	2912	314.6	4.86	18024	1480.85	64	59	cell organization and biogenesis;regulation of biological process	extracellular	metal ion binding;protein binding;structural molecule activity	Pf00683, Pf07645, Pf12662, Pf12947, Pf14670	2201	ENSG00000138829.11	FBN2	5			Hypothesized Pathways in Pathogenesis of Cardiovascular Disease	6	133.8	26.3	70.2	66.5	13.1	260.4	12.6	14.5	81.7	408	58.2	18.9	15.5	12.5	41.5	36.2	106.9	10.6
TRUE	High	Master Protein	P07437	Tubulin beta chain OS=Homo sapiens OX=9606 GN=TUBB PE=1 SV=2	0	FALSE	517.319	86	37	4223	6	1	444	49.6	4.89	89670	7519.86	36	33	cell division;cell organization and biogenesis;cellular component movement;defense response;regulation of biological process;response to stimulus;transport	cytoplasm;cytoskeleton;extracellular;membrane;nucleus;organelle lumen	catalytic activity;nucleotide binding;protein binding;structural molecule activity	Pf00091, Pf03953, Pf10644	203068	ENSG00000232575.10; ENSG00000196230.12; ENSG00000227739.10; ENSG00000224156.10; ENSG00000235067.10; ENSG00000229684.10; ENSG00000183311.16; ENSG00000232421.10	TUBB	6; CHR_HSCHR6_MHC_MANN_CTG1; CHR_HSCHR6_MHC_COX_CTG1; CHR_HSCHR6_MHC_APD_CTG1; CHR_HSCHR6_MHC_DBB_CTG1; CHR_HSCHR6_MHC_MCF_CTG1; CHR_HSCHR6_MHC_QBL_CTG1; CHR_HSCHR6_MHC_SSTO_CTG1	hsa05130; hsa04540; hsa04145	Pathogenic Escherichia coli infection; Gap junction; Phagosome	Parkin-Ubiquitin Proteasomal System pathway; Pathogenic Escherichia coli infection	38	171.9	125.5	83.7	176.7	120.4	296.9	85.5	73	98.6	197.3	99.7	50.5	107.2	61	118.5	193	57.6	119.4
TRUE	High	Master Protein	P49327	Fatty acid synthase OS=Homo sapiens OX=9606 GN=FASN PE=1 SV=3	0	FALSE	514.079	46	73	670	72	1	2511	273.3	6.44	12342	1019.74	69	67	cell differentiation;metabolic process;regulation of biological process;response to stimulus	cytoplasm;cytosol;Golgi;membrane;mitochondrion	catalytic activity;nucleotide binding;protein binding;RNA binding	Pf00106, Pf00107, Pf00108, Pf00109, Pf00698, Pf00975, Pf02801, Pf08242, Pf08659, Pf13602, Pf14765	2194	ENSG00000169710.8	FASN	17	hsa01212; hsa04152; hsa04910; hsa01100; hsa00061	Fatty acid metabolism; AMPK signaling pathway; Insulin signaling pathway; Metabolic pathways; Fatty acid biosynthesis	SREBF and miR33 in cholesterol and lipid homeostasis; Angiopoietin Like Protein 8 Regulatory Pathway; AMP-activated Protein Kinase (AMPK) Signaling; Liver X Receptor Pathway; Fatty Acid Biosynthesis; Sterol Regulatory Element-Binding Proteins (SREBP) signalling	0	190.2	127.9	34.5	130.3	53.6	57.4	36.1	50.1	58.7	152.1	93.7	97.3	48.2	28	159.5	136.4	60.2	52.2
TRUE	High	Master Protein	P68371	Tubulin beta-4B chain OS=Homo sapiens OX=9606 GN=TUBB4B PE=1 SV=1	0	FALSE	513.271	85	36	3771	1	1	445	49.8	4.89	78894	6591.09	35	32	cell organization and biogenesis;cellular component movement;defense response;regulation of biological process;response to stimulus;transport	cytoplasm;cytoskeleton;cytosol;extracellular;nucleus;organelle lumen	catalytic activity;nucleotide binding;protein binding;RNA binding;structural molecule activity	Pf00091, Pf03953, Pf10644	10383	ENSG00000188229.5	TUBB4B	9	hsa04540; hsa04145; hsa05130	Gap junction; Phagosome; Pathogenic Escherichia coli infection	Parkin-Ubiquitin Proteasomal System pathway; Pathogenic Escherichia coli infection	6	239.6	219	244.2	177.1	197.4	211	164	215.3	175.8	114.4	229.6	26.3	57	27.7	128	138.2	39.1	57
TRUE	High	Master Protein	P68871	Hemoglobin subunit beta OS=Homo sapiens OX=9606 GN=HBB PE=1 SV=2	0	FALSE	499.693	97	32	11853	25	1	147	16	7.28	269538	18382.7	32	24	cell organization and biogenesis;coagulation;metabolic process;regulation of biological process;response to stimulus;transport	cytosol;extracellular;organelle lumen	antioxidant activity;catalytic activity;metal ion binding;protein binding;transporter activity	Pf00042	3043	ENSG00000244734.3	HBB	11	hsa05144; hsa05143	Malaria; African trypanosomiasis	Folate Metabolism; Vitamin B12 Metabolism; Selenium Micronutrient Network	7	20.5	23.1	48.5	10.3	87.9	73.1	63.5	64	22.2	45.9	81.8	186.8	80.1	78.7	132.4	171.9	142.4	116.6
TRUE	High	Master Protein	P18206	Vinculin OS=Homo sapiens OX=9606 GN=VCL PE=1 SV=4	0	FALSE	487.888	64	63	1718	63	1	1134	123.7	5.66	34418	2705.16	61	59	cell growth;cell organization and biogenesis;cellular component movement;regulation of biological process;transport	cytoplasm;cytoskeleton;cytosol;extracellular;membrane;organelle lumen	protein binding;structural molecule activity	Pf01044	7414	ENSG00000035403.17	VCL	10	hsa05100; hsa04520; hsa04670; hsa04510; hsa05131; hsa04810; hsa05146	Bacterial invasion of epithelial cells; Adherens junction; Leukocyte transendothelial migration; Focal adhesion; Shigellosis; Regulation of actin cytoskeleton; Amoebiasis	Regulation of Actin Cytoskeleton; VEGFA-VEGFR2 Signaling Pathway; Integrin-mediated Cell Adhesion; Primary Focal Segmental Glomerulosclerosis FSGS; Focal Adhesion	0	140.3	161	80.4	184.3	93.1	115.5	64.7	86.1	123.3	160.3	85.6	68.9	110	63.6	79.7	56.7	92.6	44.7
TRUE	High	Master Protein	Q15063	Periostin OS=Homo sapiens OX=9606 GN=POSTN PE=1 SV=2	0	FALSE	483.292	65	50	1075	50	1	836	93.3	7.53	23729	1786.1	50	47	cell communication;cell growth;cell organization and biogenesis;regulation of biological process;response to stimulus	cytoplasm;extracellular;Golgi	metal ion binding;protein binding	Pf02469, Pf07546	10631	ENSG00000133110.14	POSTN	13			Hypothesized Pathways in Pathogenesis of Cardiovascular Disease; Amplification and Expansion of Oncogenic Pathways as Metastatic Traits	0	145.9	29.3	819	16.1	24.2	65.2	25.3	170.5	31.3	26.5	51.8	210.1	44.1	37.9	77.1	28.1	39.8	31.9
TRUE	High	Master Protein	Q14980	Nuclear mitotic apparatus protein 1 OS=Homo sapiens OX=9606 GN=NUMA1 PE=1 SV=2	0	FALSE	481.024	41	63	588	63	1	2115	238.1	5.78	12768	1057.23	62	60	cell differentiation;cell division;cell organization and biogenesis;metabolic process;regulation of biological process	chromosome;cytoplasm;cytoskeleton;cytosol;membrane;nucleus	protein binding;structural molecule activity	Pf04111, Pf07888, Pf12128	4926	ENSG00000137497.17	NUMA1	11			Ectoderm Differentiation	0	125.7	194.1	53	144.3	118.7	83.3	86.3	90.1	67.5	85.4	82.1	99.5	53.2	34.5	92.9	98.8	193	45.9
TRUE	High	Master Protein	P04350	Tubulin beta-4A chain OS=Homo sapiens OX=9606 GN=TUBB4A PE=1 SV=2	0	FALSE	476.981	85	34	3442	4	1	444	49.6	4.88	70289	5802.38	33	31	cell organization and biogenesis;regulation of biological process	cytoplasm;cytoskeleton;cytosol;nucleus	catalytic activity;metal ion binding;nucleotide binding;protein binding;structural molecule activity	Pf00091, Pf03953, Pf10644	10382	ENSG00000104833.11	TUBB4A	19	hsa05130; hsa04540; hsa04145	Pathogenic Escherichia coli infection; Gap junction; Phagosome	Pathogenic Escherichia coli infection; Parkin-Ubiquitin Proteasomal System pathway	3	164.3	99.6	56.6	148	185.5	144.1	104.5	100.5	44.5	100.2	69.5	17.5	52.3	8.2	26.5	333.2	46.6	107.1
TRUE	High	Master Protein	P14618	Pyruvate kinase PKM OS=Homo sapiens OX=9606 GN=PKM PE=1 SV=4	0	FALSE	471.338	71	40	3900	8	1	531	57.9	7.84	98080	7218.91	40	38	cell death;cell organization and biogenesis;metabolic process;response to stimulus;transport	cytoplasm;cytosol;extracellular;mitochondrion;nucleus;organelle lumen	catalytic activity;metal ion binding;nucleotide binding;protein binding;RNA binding	Pf00224, Pf02887	5315	ENSG00000067225.17	PKM	15	hsa04922; hsa00230; hsa05203; hsa00010; hsa00620; hsa05230; hsa01100; hsa01230; hsa04930; hsa01200	Glucagon signaling pathway; Purine metabolism; Viral carcinogenesis; Glycolysis / Gluconeogenesis; Pyruvate metabolism; Central carbon metabolism in cancer; Metabolic pathways; Biosynthesis of amino acids; Type II diabetes mellitus; Carbon metabolism	Photodynamic therapy-induced HIF-1 survival signaling; Amino Acid metabolism; Glycolysis and Gluconeogenesis	33	165.8	93.4	91.7	147.6	149.4	108.8	177.3	172.7	135.1	149.4	101.2	90.1	108.2	49.4	164.4	77.6	108	96.3
TRUE	High	Master Protein	P22105	Tenascin-X OS=Homo sapiens OX=9606 GN=TNXB PE=1 SV=4	0	FALSE	464.841	33	91	654	24	1	4242	457.9	5.17	11880	784.88	90	67	cell organization and biogenesis;metabolic process;regulation of biological process;response to stimulus	extracellular;membrane	catalytic activity;nucleotide binding;protein binding;receptor activity;signal transducer activity	Pf00041, Pf00147, Pf00757, Pf01500, Pf04885, Pf07974	7148		TNXB	6	hsa04512; hsa05206; hsa04151; hsa04510	ECM-receptor interaction; MicroRNAs in cancer; PI3K-Akt signaling pathway; Focal adhesion	Focal Adhesion-PI3K-Akt-mTOR-signaling pathway; VEGFA-VEGFR2 Signaling Pathway; miRNA targets in ECM and membrane receptors; Focal Adhesion	66	36.8	59.9	53.3	56.8	45.1	83	83.1	207.1	68.5	87.8	126.5	67.9	127.8	55.7	218.3	47.2	67.1	45.8
TRUE	High	Master Protein	Q9BVA1	Tubulin beta-2B chain OS=Homo sapiens OX=9606 GN=TUBB2B PE=1 SV=1	0	FALSE	463.382	84	34	3283	1	1	445	49.9	4.89	69117	5613.58	33	31	cell organization and biogenesis;cellular component movement;regulation of biological process	cytoplasm;cytoskeleton;nucleus	catalytic activity;nucleotide binding;protein binding;structural molecule activity	Pf00091, Pf03953, Pf10644	347733	ENSG00000137285.9	TUBB2B	6	hsa04540; hsa04145; hsa05130	Gap junction; Phagosome; Pathogenic Escherichia coli infection	Parkin-Ubiquitin Proteasomal System pathway; Pathogenic Escherichia coli infection	0	69.6	33.2	1384.4	42.4	469.8	62.4	51.2	57.2	41.6	125.8	82.1	19.3	26.2	12.1	20.5	91.6	19	122.6
TRUE	High	Master Protein	P14625	Endoplasmin OS=Homo sapiens OX=9606 GN=HSP90B1 PE=1 SV=1	0	FALSE	462.772	61	55	1987	53	1	803	92.4	4.84	37333	3056.04	55	50	cell organization and biogenesis;metabolic process;regulation of biological process;response to stimulus;transport	cytosol;endoplasmic reticulum;extracellular;membrane;nucleus;organelle lumen	metal ion binding;nucleotide binding;protein binding;RNA binding	Pf00183, Pf02518, Pf13589	7184	ENSG00000166598.14	HSP90B1	12	hsa04151; hsa04141; hsa04915; hsa05215; hsa04918; hsa05200	PI3K-Akt signaling pathway; Protein processing in endoplasmic reticulum; Estrogen signaling pathway; Prostate cancer; Thyroid hormone synthesis; Pathways in cancer	Focal Adhesion-PI3K-Akt-mTOR-signaling pathway; Photodynamic therapy-induced unfolded protein response; Sudden Infant Death Syndrome (SIDS) Susceptibility Pathways	2	133.9	105.4	62	155.2	85.6	222.7	87.3	66.6	91.5	163.9	82.6	68.7	87.2	57.8	129.8	221.3	86.9	45.6
TRUE	High	Master Protein	Q13885	Tubulin beta-2A chain OS=Homo sapiens OX=9606 GN=TUBB2A PE=1 SV=1	0	FALSE	461.862	85	35	3121	3	1	445	49.9	4.89	67737	5430.02	34	32	cell organization and biogenesis	cytoplasm;cytoskeleton;nucleus	catalytic activity;nucleotide binding;protein binding;structural molecule activity	Pf00091, Pf03953, Pf10644	7280	ENSG00000137267.5	TUBB2A	6	hsa04145; hsa05130; hsa04540	Phagosome; Pathogenic Escherichia coli infection; Gap junction	Pathogenic Escherichia coli infection; Parkin-Ubiquitin Proteasomal System pathway	8	147.2	70.1	35.2	78.8	245.7	154.3	35.1	85.4	44.2	138	38.8	16.4	43.1	61.2	22.4	379.3	17.5	99.1
TRUE	High	Master Protein	Q07157	Tight junction protein ZO-1 OS=Homo sapiens OX=9606 GN=TJP1 PE=1 SV=3	0	FALSE	458.738	51	60	765	8	1	1748	195.3	6.7	14267	1281.4	58	55	cell communication;cell organization and biogenesis;regulation of biological process;response to stimulus	cytoplasm;cytosol;membrane	protein binding	Pf00018, Pf00595, Pf00625, Pf00791, Pf07653, Pf13180	7082	ENSG00000104067.16	TJP1	15	hsa05110; hsa04530; hsa05132; hsa05120; hsa04520; hsa04540	Vibrio cholerae infection; Tight junction; Salmonella infection; Epithelial cell signaling in Helicobacter pylori infection; Adherens junction; Gap junction		51	191.4	210.7	39.6	141.8	86.5	86.8	170.1	270	168.3	82.6	127.9	51.4	40.3	34	80.7	56.7	129.4	27
TRUE	High	Master Protein	P08133	Annexin A6 OS=Homo sapiens OX=9606 GN=ANXA6 PE=1 SV=3	0	FALSE	458.629	75	57	2516	30	1	673	75.8	5.6	53721	3549.75	57	48	cell organization and biogenesis;cellular homeostasis;regulation of biological process;response to stimulus;transport	cytoplasm;membrane;mitochondrion	metal ion binding;nucleotide binding;protein binding;transporter activity	Pf00191	309	ENSG00000197043.13	ANXA6	5			Prostaglandin Synthesis and Regulation; Calcium Regulation in the Cardiac Cell	27	88.6	99.7	211.7	99.9	256.9	107.5	124.1	50.7	95.1	117.9	59.5	82.9	101.9	73.7	87.1	84.6	90.7	87.4
TRUE	High	Master Protein	P02545	Prelamin-A/C OS=Homo sapiens OX=9606 GN=LMNA PE=1 SV=1	0	FALSE	451.117	75	62	2773	17	1	664	74.1	7.02	64603	4315.93	61	59	cell organization and biogenesis;regulation of biological process;response to stimulus;transport	cytosol;membrane;nucleus	protein binding;structural molecule activity	Pf00038, Pf00932	4000	ENSG00000160789.19	LMNA	1	hsa05410; hsa05414; hsa04210; hsa05412	Hypertrophic cardiomyopathy (HCM); Dilated cardiomyopathy; Apoptosis; Arrhythmogenic right ventricular cardiomyopathy (ARVC)	Fas Ligand (FasL) pathway and Stress induction of Heat Shock Proteins (HSP) regulation; Arrhythmogenic Right Ventricular Cardiomyopathy; Adipogenesis	45	129.5	118.1	59.2	95.3	80.4	89	70.3	50.6	93.9	135.7	119.5	101.1	128.4	75.1	89.8	93.1	74	66.7
TRUE	High	Master Protein	P60709	Actin, cytoplasmic 1 OS=Homo sapiens OX=9606 GN=ACTB PE=1 SV=1	0	FALSE	447.955	90	40	6325	14	1	375	41.7	5.48	160831	11797.8	39	33	cell organization and biogenesis;cellular component movement;metabolic process;regulation of biological process;response to stimulus	cytoplasm;cytoskeleton;cytosol;membrane;nucleus	DNA binding;nucleotide binding;protein binding;structural molecule activity	Pf00022	60	ENSG00000075624.13	ACTB	7	hsa05414; hsa04520; hsa05412; hsa04510; hsa05410; hsa04919; hsa05110; hsa04390; hsa04670; hsa04530; hsa05132; hsa05131; hsa04210; hsa05164; hsa04921; hsa05100; hsa04810; hsa05205; hsa04145; hsa04015; hsa05130; hsa04611; hsa05416; hsa04971	Dilated cardiomyopathy; Adherens junction; Arrhythmogenic right ventricular cardiomyopathy (ARVC); Focal adhesion; Hypertrophic cardiomyopathy (HCM); Thyroid hormone signaling pathway; Vibrio cholerae infection; Hippo signaling pathway; Leukocyte transendothelial migration; Tight junction; Salmonella infection; Shigellosis; Apoptosis; Influenza A; Oxytocin signaling pathway; Bacterial invasion of…	Fas Ligand (FasL) pathway and Stress induction of Heat Shock Proteins (HSP) regulation; Myometrial Relaxation and Contraction Pathways; Common Pathways Underlying Drug Addiction; Arrhythmogenic Right Ventricular Cardiomyopathy; Focal Adhesion; Regulation of Actin Cytoskeleton; Pathogenic Escherichia coli infection	30	155.7	130.1	74.9	167.4	108.4	120.1	92.5	70	125.5	128.3	92.6	96.1	122.1	65.8	116.2	124.6	88	75.3
TRUE	High	Master Protein	P06396	Gelsolin OS=Homo sapiens OX=9606 GN=GSN PE=1 SV=1	0	FALSE	434.335	68	37	2302	29	1	782	85.6	6.28	50270	4378.35	35	33	cell death;cell organization and biogenesis;metabolic process;regulation of biological process;response to stimulus;transport	cytoplasm;cytoskeleton;cytosol;extracellular;membrane;nucleus;organelle lumen	metal ion binding;protein binding	Pf00626	2934	ENSG00000148180.19	GSN	9	hsa04666; hsa05203; hsa04810	Fc gamma R-mediated phagocytosis; Viral carcinogenesis; Regulation of actin cytoskeleton	Regulation of Actin Cytoskeleton; Senescence and Autophagy in Cancer	8	159.2	125.9	75.4	140.6	101.4	108.8	68.9	82.2	144.5	108.2	127.4	104.3	90.8	63.6	103.4	106.1	73.2	65.3
TRUE	High	Master Protein	P07900	Heat shock protein HSP 90-alpha OS=Homo sapiens OX=9606 GN=HSP90AA1 PE=1 SV=5	0	FALSE	433.084	67	55	1910	37	1	732	84.6	5.02	38785	3019.45	54	50	cell organization and biogenesis;metabolic process;regulation of biological process;response to stimulus;transport	cytoplasm;cytosol;extracellular;membrane;nucleus;organelle lumen	catalytic activity;enzyme regulator activity;nucleotide binding;protein binding;RNA binding	Pf00183, Pf02518, Pf13589	3320	ENSG00000080824.18	HSP90AA1	14	hsa04915; hsa05200; hsa04151; hsa05215; hsa04621; hsa04612; hsa04141; hsa04914	Estrogen signaling pathway; Pathways in cancer; PI3K-Akt signaling pathway; Prostate cancer; NOD-like receptor signaling pathway; Antigen processing and presentation; Protein processing in endoplasmic reticulum; Progesterone-mediated oocyte maturation	Focal Adhesion-PI3K-Akt-mTOR-signaling pathway; Aryl Hydrocarbon Receptor Pathway; VEGFA-VEGFR2 Signaling Pathway; Aryl Hydrocarbon Receptor; EBV LMP1 signaling; NRF2 pathway; Nucleotide-binding Oligomerization Domain (NOD) pathway; Constitutive Androstane Receptor Pathway; Corticotropin-releasing hormone signaling pathway; TNF alpha Signaling Pathway	18	140.7	114.4	63.5	158	84	126.5	44.3	63	94.6	164.8	78.6	105.7	66.3	36.2	137.2	175.8	105	67.7
TRUE	High	Master Protein	P13639	Elongation factor 2 OS=Homo sapiens OX=9606 GN=EEF2 PE=1 SV=4	0	FALSE	432.733	70	55	1920	54	1	858	95.3	6.83	36272	3151.47	54	44	cell differentiation;cell proliferation;metabolic process;regulation of biological process;response to stimulus;transport	cytoplasm;cytosol;extracellular;membrane;nucleus;organelle lumen;ribosome	catalytic activity;nucleotide binding;protein binding;RNA binding	Pf00009, Pf00679, Pf03144, Pf03764, Pf14492	1938	ENSG00000167658.15	EEF2	19	hsa04152; hsa04921	AMPK signaling pathway; Oxytocin signaling pathway	AMP-activated Protein Kinase (AMPK) Signaling; Brain-Derived Neurotrophic Factor (BDNF) signaling pathway; Translation Factors	1	241.5	198.8	116.2	249	98	175.1	93.4	70.5	142.4	130.9	111.3	66.2	69.4	45.1	133.6	99.9	79.1	30.7
TRUE	High	Master Protein	P22314	Ubiquitin-like modifier-activating enzyme 1 OS=Homo sapiens OX=9606 GN=UBA1 PE=1 SV=3	0	FALSE	427.07	74	52	1709	52	1	1058	117.8	5.76	39857	2733.95	51	45	metabolic process;response to stimulus	cytoplasm;cytosol;membrane;mitochondrion;nucleus	catalytic activity;nucleotide binding;protein binding;RNA binding	Pf00899, Pf02134, Pf09358, Pf10585	7317	ENSG00000130985.16	UBA1	X	hsa04120; hsa05012	Ubiquitin mediated proteolysis; Parkinson's disease	Parkinsons Disease Pathway; Proteasome Degradation; Parkin-Ubiquitin Proteasomal System pathway	0	155.7	164.4	113.1	153.6	93.8	148.6	82.1	78.5	170.5	209.9	186.2	48.6	56.8	30.9	119.5	162.5	79.9	42.1
TRUE	High	Master Protein	P08238	Heat shock protein HSP 90-beta OS=Homo sapiens OX=9606 GN=HSP90AB1 PE=1 SV=4	0	FALSE	421.454	65	51	1988	32	1	724	83.2	5.03	40970	3143.8	50	45	cell organization and biogenesis;metabolic process;regulation of biological process;response to stimulus;transport	cell surface;cytoplasm;cytosol;extracellular;membrane;mitochondrion;nucleus;organelle lumen	enzyme regulator activity;nucleotide binding;protein binding;RNA binding	Pf00183, Pf02518, Pf13589	3326	ENSG00000096384.19	HSP90AB1	6	hsa04141; hsa04914; hsa04151; hsa05215; hsa04621; hsa04612; hsa04915; hsa05200	Protein processing in endoplasmic reticulum; Progesterone-mediated oocyte maturation; PI3K-Akt signaling pathway; Prostate cancer; NOD-like receptor signaling pathway; Antigen processing and presentation; Estrogen signaling pathway; Pathways in cancer	NRF2 pathway; Focal Adhesion-PI3K-Akt-mTOR-signaling pathway	0	127.4	136.9	67.2	192.4	91.1	106.5	96.6	76.3	108	156.7	84.5	110.5	57.1	48.9	74.2	169.5	67.8	45.8
TRUE	High	Master Protein	P04406	Glyceraldehyde-3-phosphate dehydrogenase OS=Homo sapiens OX=9606 GN=GAPDH PE=1 SV=3	0	FALSE	420.369	92	33	4131	32	1	335	36	8.46	99565	6618.2	33	29	cell death;cell organization and biogenesis;defense response;metabolic process;regulation of biological process;response to stimulus	cytoplasm;cytoskeleton;cytosol;membrane;nucleus	catalytic activity;enzyme regulator activity;nucleotide binding;protein binding	Pf00044, Pf02800	2597	ENSG00000111640.14	GAPDH	12	hsa05010; hsa01230; hsa01200; hsa00010; hsa04066; hsa01100	Alzheimer's disease; Biosynthesis of amino acids; Carbon metabolism; Glycolysis / Gluconeogenesis; HIF-1 signaling pathway; Metabolic pathways	Cori Cycle; Glycolysis and Gluconeogenesis; Alzheimers Disease; Sudden Infant Death Syndrome (SIDS) Susceptibility Pathways	1	267.3	157.3	115.4	206.1	151.3	170.9	164.6	127.8	161.9	224.9	146	31.4	91.7	39.4	90.6	59.5	85.5	66.2
TRUE	High	Master Protein	P55072	Transitional endoplasmic reticulum ATPase OS=Homo sapiens OX=9606 GN=VCP PE=1 SV=4	0	FALSE	417.865	74	51	1898	51	1	806	89.3	5.26	37494	2955.81	50	49	cell communication;cell organization and biogenesis;metabolic process;regulation of biological process;response to stimulus;transport	cytoplasm;cytosol;endoplasmic reticulum;extracellular;membrane;nucleus;organelle lumen;proteasome	catalytic activity;enzyme regulator activity;nucleotide binding;protein binding;RNA binding	Pf00004, Pf00910, Pf01057, Pf01078, Pf02359, Pf02933, Pf05496, Pf05673, Pf06068, Pf07724, Pf07726, Pf07728, Pf09336, Pf13191, Pf13207, Pf13401	7415	ENSG00000165280.15	VCP	9	hsa05134; hsa04141	Legionellosis; Protein processing in endoplasmic reticulum		0	134	156.9	94.2	169.1	93.7	135.9	93.7	112.1	136.8	175.8	99.5	73.6	106.4	34.5	58.4	96.3	85	55.1
TRUE	High	Master Protein	Q14697	Neutral alpha-glucosidase AB OS=Homo sapiens OX=9606 GN=GANAB PE=1 SV=3	0	FALSE	417.424	63	45	1427	13	1	944	106.8	6.14	22631	2165.43	45	40	metabolic process	endoplasmic reticulum;Golgi;membrane;organelle lumen	catalytic activity;RNA binding	Pf01055, Pf13802	23193	ENSG00000089597.16	GANAB	11	hsa04141; hsa01100; hsa00510	Protein processing in endoplasmic reticulum; Metabolic pathways; N-Glycan biosynthesis		32	84.3	101.2	88.3	123.4	145.6	97.3	138.1	81.4	80.2	91.7	62.3	56.4	55.6	21.5	60.1	107.7	70.8	38.5
TRUE	High	Master Protein	P0DMV9	Heat shock 70 kDa protein 1B OS=Homo sapiens OX=9606 GN=HSPA1B PE=1 SV=1	0	FALSE	409.932	75	38	2493	28	1	641	70	5.66	53718	4090.06	36	37	cell organization and biogenesis;metabolic process;regulation of biological process;response to stimulus;transport	cytoplasm;cytoskeleton;cytosol;endoplasmic reticulum;extracellular;mitochondrion;nucleus	catalytic activity;nucleotide binding;protein binding;receptor activity;RNA binding	Pf00012, Pf06723	3303; 3304	ENSG00000232804.5; ENSG00000234475.5; ENSG00000231555.4; ENSG00000235941.5; ENSG00000204389.9; ENSG00000204388.6; ENSG00000212866.6; ENSG00000237724.5; ENSG00000224501.5	HSPA1A; HSPA1B	6; CHR_HSCHR6_MHC_APD_CTG1; CHR_HSCHR6_MHC_DBB_CTG1; CHR_HSCHR6_MHC_QBL_CTG1; CHR_HSCHR6_MHC_COX_CTG1	hsa04213; hsa04010; hsa05164; hsa04144; hsa03040; hsa05162; hsa04612; hsa05169; hsa05145; hsa05134; hsa05020; hsa04141; hsa04915	Longevity regulating pathway - multiple species; MAPK signaling pathway; Influenza A; Endocytosis; Spliceosome; Measles; Antigen processing and presentation; Epstein-Barr virus infection; Toxoplasmosis; Legionellosis; Prion diseases; Protein processing in endoplasmic reticulum; Estrogen signaling pathway	Apoptosis Modulation by HSP70; VEGFA-VEGFR2 Signaling Pathway; Apoptosis Modulation and Signaling; MAPK Signaling Pathway; NRF2 pathway; Parkin-Ubiquitin Proteasomal System pathway	8	99.8	175.1	74.6	137.9	213.6	107.8	89	97.4	133.7	99.8	109.4	82.3	183.8	77.2	117.4	177.9	70.3	117.3
TRUE	High	Master Protein	O43491	Band 4.1-like protein 2 OS=Homo sapiens OX=9606 GN=EPB41L2 PE=1 SV=1	0	FALSE	406.408	59	47	922	29	1	1005	112.5	5.44	17724	1541.74	47	41	cell division;cell organization and biogenesis;transport	cytoplasm;cytoskeleton;cytosol;membrane;nucleus	protein binding;structural molecule activity	Pf00373, Pf04382, Pf05902, Pf08736, Pf09379, Pf09380	2037	ENSG00000079819.18	EPB41L2	6	hsa04530	Tight junction		18	85.9	169.5	124.2	155.5	68	137	120	116.8	191.9	221.1	76.1	48.4	64.4	33.7	99.2	77.2	78.8	48.1
TRUE	High	Master Protein	P08603	Complement factor H OS=Homo sapiens OX=9606 GN=CFH PE=1 SV=4	0	FALSE	406.087	58	52	823	49	1	1231	139	6.61	12984	1195.33	51	48	defense response;metabolic process;regulation of biological process;response to stimulus	extracellular	protein binding	Pf00084	3075		CFH	1	hsa04610; hsa05150	Complement and coagulation cascades; Staphylococcus aureus infection	Complement and Coagulation Cascades	3	78.9	50.1	79.5	46.5	55.6	72.1	54.7	67.3	54.9	35.6	107.3	89.5	204.8	214	69.5	183.9	86.8	234.4
TRUE	High	Master Protein	P11142	Heat shock cognate 71 kDa protein OS=Homo sapiens OX=9606 GN=HSPA8 PE=1 SV=1	0	FALSE	393.848	70	41	2581	30	1	646	70.9	5.52	58899	4398.75	39	40	cell communication;cell organization and biogenesis;metabolic process;regulation of biological process;response to stimulus;transport	cytoplasm;cytosol;endosome;extracellular;membrane;nucleus;organelle lumen;spliceosomal complex	catalytic activity;nucleotide binding;protein binding;RNA binding	Pf00012, Pf02463, Pf06723	3312	ENSG00000109971.13	HSPA8	11	hsa04010; hsa04213; hsa04915; hsa05145; hsa03040; hsa04144; hsa04612; hsa05164; hsa04141; hsa05169; hsa05134; hsa05162	MAPK signaling pathway; Longevity regulating pathway - multiple species; Estrogen signaling pathway; Toxoplasmosis; Spliceosome; Endocytosis; Antigen processing and presentation; Influenza A; Protein processing in endoplasmic reticulum; Epstein-Barr virus infection; Legionellosis; Measles	Parkin-Ubiquitin Proteasomal System pathway; MAPK Signaling Pathway; Exercise-induced Circadian Regulation	9	170.9	154.6	106.5	158.5	125.9	136.3	109.3	93.5	146.5	173.8	116.7	116.5	86.2	47.1	119.1	120.6	70.6	87.8
TRUE	High	Master Protein	Q15582	Transforming growth factor-beta-induced protein ig-h3 OS=Homo sapiens OX=9606 GN=TGFBI PE=1 SV=1	0	FALSE	392.841	75	36	1193	36	1	683	74.6	7.71	25965	1817.14	35	31	cell differentiation;cell organization and biogenesis;cell proliferation;metabolic process;regulation of biological process;response to stimulus	extracellular;membrane	protein binding	Pf02469, Pf07546	7045	ENSG00000120708.16	TGFBI	5				0	64.9	12.9	49.3	40.1	14.1	108.5	322.6	123.3	24.3	54.3	126.9	72.2	76.1	58.2	162.3	93.1	55.7	77.3
TRUE	High	Master Protein	P12109	Collagen alpha-1(VI) chain OS=Homo sapiens OX=9606 GN=COL6A1 PE=1 SV=3	0	FALSE	390.633	47	40	1644	40	1	1028	108.5	5.43	33564	2672.84	38	31	cell differentiation;cell organization and biogenesis;metabolic process;response to stimulus	extracellular;membrane;organelle lumen	protein binding	Pf00092, Pf01391, Pf13519	1291	ENSG00000142156.14	COL6A1	21	hsa04510; hsa04151; hsa04512; hsa04974	Focal adhesion; PI3K-Akt signaling pathway; ECM-receptor interaction; Protein digestion and absorption	miRNA targets in ECM and membrane receptors	0	72.4	40.7	180.6	98.3	50.7	94.2	89.4	41	62.6	64.2	80	85.4	160.9	86.3	70.3	114.1	91.1	132.5
TRUE	High	Master Protein	P21810	Biglycan OS=Homo sapiens OX=9606 GN=BGN PE=1 SV=2	0	FALSE	390.359	72	34	1831	33	1	368	41.6	7.52	43082	3302.86	34	27	cell organization and biogenesis;metabolic process;regulation of biological process;response to stimulus	cell surface;cytoplasm;extracellular;membrane;organelle lumen	enzyme regulator activity;protein binding;structural molecule activity	Pf01462, Pf12799, Pf13855, Pf14580	633	ENSG00000182492.15	BGN	X				1	105.6	21.5	119.1	15	5.8	15	15.9	32.9	9.8	33.8	29.1	20.2	336.5	524.1	39.9	10.7	76.5	303.9
TRUE	High	Master Protein	O15230	Laminin subunit alpha-5 OS=Homo sapiens OX=9606 GN=LAMA5 PE=1 SV=8	0	FALSE	389.425	26	64	555	63	1	3695	399.5	7.02	9831	829.77	63	54	cell differentiation;cell organization and biogenesis;cell proliferation;cellular component movement;regulation of biological process;response to stimulus;transport	extracellular;membrane;nucleus	catalytic activity;motor activity;protein binding;structural molecule activity	Pf00052, Pf00053, Pf00054, Pf00055, Pf00529, Pf01576, Pf02210, Pf06008, Pf06009, Pf12795, Pf13514, Pf13747	3911	ENSG00000130702.15	LAMA5	20	hsa04151; hsa05145; hsa04512; hsa05146; hsa04510; hsa05200; hsa01100; hsa05222	PI3K-Akt signaling pathway; Toxoplasmosis; ECM-receptor interaction; Amoebiasis; Focal adhesion; Pathways in cancer; Metabolic pathways; Small cell lung cancer	Inflammatory Response Pathway; Alpha 6 Beta 4 signaling pathway; Primary Focal Segmental Glomerulosclerosis FSGS; Focal Adhesion; Focal Adhesion-PI3K-Akt-mTOR-signaling pathway	1	205.9	111.2	355.9	101	74.5	98.9	87.7	117.6	58.5	38.8	57.8	27.5	33.9	64.1	48	55.4	55.5	22.1
TRUE	High	Master Protein	Q14112	Nidogen-2 OS=Homo sapiens OX=9606 GN=NID2 PE=1 SV=3	0	FALSE	389.248	48	47	809	46	1	1375	151.2	5.29	15980	1380.55	47	40	cell organization and biogenesis	cell surface;extracellular;membrane	metal ion binding;protein binding	Pf00058, Pf00086, Pf06119, Pf06247, Pf07474, Pf07645, Pf08450, Pf12662, Pf12947, Pf14670	22795	ENSG00000087303.17	NID2	14				1	164.2	110.9	146.7	131.1	67.8	139.8	106	93.3	78.4	107.3	82.2	78.4	193.3	61.9	104.9	59.3	193.5	51.8
TRUE	High	Master Protein	P01009	Alpha-1-antitrypsin OS=Homo sapiens OX=9606 GN=SERPINA1 PE=1 SV=3	0	FALSE	387.97	69	43	1941	10	1	418	46.7	5.59	38536	2941.63	42	37	cell organization and biogenesis;coagulation;defense response;metabolic process;regulation of biological process;response to stimulus;transport	endoplasmic reticulum;extracellular;Golgi;membrane;organelle lumen	enzyme regulator activity;protein binding	Pf00079	5265	ENSG00000197249.13	SERPINA1	14	hsa04610	Complement and coagulation cascades	Complement and Coagulation Cascades; NRF2 pathway; Lung fibrosis	36	32.4	18.9	46.7	29.5	53	32	49.8	59	28.6	20.9	47	47.8	69	731.6	29.3	36.9	31.5	171.1
TRUE	High	Master Protein	P07996	Thrombospondin-1 OS=Homo sapiens OX=9606 GN=THBS1 PE=1 SV=2	0	FALSE	387.711	49	52	632	49	1	1170	129.3	4.94	14595	1029.55	51	46	cell organization and biogenesis;cellular component movement;defense response;metabolic process;regulation of biological process;response to stimulus;transport	cell surface;cytoplasm;endoplasmic reticulum;extracellular;organelle lumen	metal ion binding;protein binding	Pf00090, Pf00093, Pf02412, Pf05735, Pf12947	7057	ENSG00000137801.10	THBS1	15	hsa04115; hsa04145; hsa04151; hsa05144; hsa05206; hsa05219; hsa05205; hsa04510; hsa04015; hsa04512; hsa04350	p53 signaling pathway; Phagosome; PI3K-Akt signaling pathway; Malaria; MicroRNAs in cancer; Bladder cancer; Proteoglycans in cancer; Focal adhesion; Rap1 signaling pathway; ECM-receptor interaction; TGF-beta signaling pathway	Bladder Cancer; TGF-beta Receptor Signaling; TGF-beta Signaling Pathway; Focal Adhesion-PI3K-Akt-mTOR-signaling pathway; Apoptosis-related network due to altered Notch3 in ovarian cancer; Senescence and Autophagy in Cancer; Inflammatory Response Pathway; Focal Adhesion; miRNA targets in ECM and membrane receptors	3	113.2	20.3	79.4	17.2	14.1	40.9	15.4	26.4	14.9	58	32.4	63.4	107.1	848.7	50.4	47.2	35.6	108.6
TRUE	High	Master Protein	P06576	ATP synthase subunit beta, mitochondrial OS=Homo sapiens OX=9606 GN=ATP5F1B PE=1 SV=3	0	FALSE	384.573	79	30	2156	30	1	529	56.5	5.4	46046	3808.63	30	29	cell differentiation;cell organization and biogenesis;cellular homeostasis;metabolic process;regulation of biological process;transport	cell surface;membrane;mitochondrion;nucleus;organelle lumen	catalytic activity;nucleotide binding;protein binding;transporter activity	Pf00006, Pf00306, Pf02874	506	ENSG00000110955.8	ATP5B	12	hsa00190; hsa05016; hsa05010; hsa01100; hsa05012	Oxidative phosphorylation; Huntington's disease; Alzheimer's disease; Metabolic pathways; Parkinson's disease	Oxidative phosphorylation; Electron Transport Chain	0	206.1	157.7	53.6	150.9	84.5	187.9	64.2	84.8	56.7	115	69.4	58.1	80.4	42.1	91.7	125	66.8	49.3
TRUE	High	Master Protein	P05091	Aldehyde dehydrogenase, mitochondrial OS=Homo sapiens OX=9606 GN=ALDH2 PE=1 SV=2	0	FALSE	383.823	82	42	1945	37	1	517	56.3	7.05	40176	3389.55	41	40	metabolic process	mitochondrion;organelle lumen	catalytic activity;nucleotide binding	Pf00171	217	ENSG00000111275.12	ALDH2	12	hsa00280; hsa00010; hsa00340; hsa00380; hsa00620; hsa00053; hsa00040; hsa00561; hsa00410; hsa00330; hsa00310; hsa01100; hsa00071	Valine, leucine and isoleucine degradation; Glycolysis / Gluconeogenesis; Histidine metabolism; Tryptophan metabolism; Pyruvate metabolism; Ascorbate and aldarate metabolism; Pentose and glucuronate interconversions; Glycerolipid metabolism; beta-Alanine metabolism; Arginine and proline metabolism; Lysine degradation; Metabolic pathways; Fatty acid degradation	Fatty Acid Omega Oxidation; Tryptophan metabolism	5	405.4	109.3	53.5	201.5	45.8	285.4	33.2	25.9	92.7	224	103.6	54.2	33.6	13.1	113.9	26.9	42.9	20
TRUE	High	Master Protein	P00450	Ceruloplasmin OS=Homo sapiens OX=9606 GN=CP PE=1 SV=1	0	FALSE	383.373	57	43	721	43	1	1065	122.1	5.72	14722	1145.05	42	39	cellular homeostasis;metabolic process;transport	extracellular;membrane;organelle lumen	catalytic activity;metal ion binding;protein binding	Pf00394, Pf07731, Pf07732	1356		CP	3	hsa00860	Porphyrin and chlorophyll metabolism		0	57.5	62.3	64.5	86.8	103.6	52.8	95.9	131.7	73.5	40.2	107.5	126.3	64.4	372.8	47.7	50.3	151	230.2
TRUE	High	Master Protein	P10809	60 kDa heat shock protein, mitochondrial OS=Homo sapiens OX=9606 GN=HSPD1 PE=1 SV=2	0	FALSE	380.541	76	41	1586	41	1	573	61	5.87	37048	2507.67	40	37	cell organization and biogenesis;cell proliferation;metabolic process;regulation of biological process;response to stimulus;transport	cell surface;cytoplasm;cytosol;endosome;membrane;mitochondrion;organelle lumen	catalytic activity;DNA binding;nucleotide binding;protein binding;RNA binding	Pf00118	3329	ENSG00000144381.16	HSPD1	2	hsa04940; hsa03018; hsa05152; hsa05134	Type I diabetes mellitus; RNA degradation; Tuberculosis; Legionellosis	Apoptosis-related network due to altered Notch3 in ovarian cancer; Sudden Infant Death Syndrome (SIDS) Susceptibility Pathways	0	171.7	115.9	53	203.2	62.9	176.7	67	56.7	45.6	117.8	50.2	72.5	49.3	29.8	89.3	134.6	76.5	37.5
TRUE	High	Master Protein	P11216	Glycogen phosphorylase, brain form OS=Homo sapiens OX=9606 GN=PYGB PE=1 SV=5	0	FALSE	377.25	58	45	1248	38	1	843	96.6	6.86	24959	1844.76	44	43	metabolic process;transport	cytoplasm;extracellular;membrane;organelle lumen	catalytic activity;protein binding	Pf00343	5834	ENSG00000100994.11	PYGB	20	hsa04931; hsa00500; hsa04910; hsa01100; hsa04922	Insulin resistance; Starch and sucrose metabolism; Insulin signaling pathway; Metabolic pathways; Glucagon signaling pathway	Glycogen Metabolism	7	110.8	102	101.2	97.9	145.9	124.4	78.2	61.1	105.5	87.1	246.6	47.1	52.7	26.1	200	227.2	103.7	57.8
TRUE	High	Master Protein	P24821	Tenascin OS=Homo sapiens OX=9606 GN=TNC PE=1 SV=3	0	FALSE	376.198	36	53	295	53	1	2201	240.7	4.89	6095	487.1	53	48	cell communication;cell differentiation;cell organization and biogenesis;metabolic process;regulation of biological process;response to stimulus	extracellular;membrane;organelle lumen	protein binding	Pf00041, Pf00147, Pf07974	3371	ENSG00000041982.15	TNC	9	hsa05206; hsa04151; hsa04510; hsa04512	MicroRNAs in cancer; PI3K-Akt signaling pathway; Focal adhesion; ECM-receptor interaction	TGF-B Signaling in Thyroid Cells for Epithelial-Mesenchymal Transition; TGF-beta Signaling Pathway; Focal Adhesion-PI3K-Akt-mTOR-signaling pathway; Amplification and Expansion of Oncogenic Pathways as Metastatic Traits; Focal Adhesion	0	33.8	22.9	146.6	56.2	32	32.1	81.3	63.4	17.7	44.1	88.2	370.1	175	433.1	52.1	236.8	12	318
TRUE	High	Master Protein	P11021	Endoplasmic reticulum chaperone BiP OS=Homo sapiens OX=9606 GN=HSPA5 PE=1 SV=2	0	FALSE	374.324	57	41	2373	39	1	654	72.3	5.16	49995	3807.43	41	40	cell communication;cell death;cell differentiation;cell organization and biogenesis;metabolic process;regulation of biological process;response to stimulus;transport	cell surface;cytoplasm;endoplasmic reticulum;membrane;mitochondrion;nucleus;organelle lumen	catalytic activity;metal ion binding;nucleotide binding;protein binding	Pf00012, Pf01968, Pf06723	3309	ENSG00000044574.7	HSPA5	9	hsa04141; hsa04612; hsa03060; hsa04918; hsa05020	Protein processing in endoplasmic reticulum; Antigen processing and presentation; Protein export; Thyroid hormone synthesis; Prion diseases	Photodynamic therapy-induced unfolded protein response; Parkin-Ubiquitin Proteasomal System pathway; Apoptosis-related network due to altered Notch3 in ovarian cancer; MAPK Signaling Pathway	2	144.1	112.4	62.4	173.5	105.2	146	72.7	98	120.8	157.5	95.2	95.2	75.4	77.6	119.6	233.1	131.8	54.2
TRUE	High	Master Protein	P30101	Protein disulfide-isomerase A3 OS=Homo sapiens OX=9606 GN=PDIA3 PE=1 SV=4	0	FALSE	368.177	65	36	1628	31	1	505	56.7	6.35	33993	2869.1	35	32	cellular homeostasis;metabolic process;regulation of biological process;response to stimulus;transport	cell surface;endoplasmic reticulum;membrane;nucleus;organelle lumen	catalytic activity;protein binding;RNA binding	Pf00085, Pf13098, Pf13848, Pf13899, Pf13905	2923	ENSG00000167004.12	PDIA3	15	hsa04612; hsa04141	Antigen processing and presentation; Protein processing in endoplasmic reticulum		5	119.7	87.8	66.6	219.4	74.7	155.8	88	94.5	100.7	209.7	95.3	112.1	92.8	63.5	110.5	378	79.4	45.2
TRUE	High	Master Protein	P16157	Ankyrin-1 OS=Homo sapiens OX=9606 GN=ANK1 PE=1 SV=3	0	FALSE	367.328	39	49	465	46	1	1881	206.1	6.01	8380	723.14	47	43	cell organization and biogenesis;regulation of biological process;response to stimulus;transport	cytoplasm;cytoskeleton;cytosol;endoplasmic reticulum;membrane;nucleus	protein binding;structural molecule activity	Pf00023, Pf00531, Pf00791, Pf12796, Pf13606, Pf13637, Pf13857	286	ENSG00000029534.19	ANK1	8	hsa05205	Proteoglycans in cancer		3	38.2	33.1	115.6	25.9	61.5	67.1	42.6	88.7	21.8	53.5	85.5	64.3	43.7	75.4	101	64.4	112.3	38
TRUE	High	Master Protein	P29401	Transketolase OS=Homo sapiens OX=9606 GN=TKT PE=1 SV=3	0	FALSE	366.815	67	33	1179	33	1	623	67.8	7.66	25549	2193.4	32	29	metabolic process;regulation of biological process	cytosol	catalytic activity;metal ion binding;protein binding	Pf00456, Pf00676, Pf02775, Pf02779, Pf02780, Pf09364	7086	ENSG00000163931.15	TKT	3	hsa00030; hsa01100; hsa01200; hsa01230	Pentose phosphate pathway; Metabolic pathways; Carbon metabolism; Biosynthesis of amino acids	Pentose Phosphate Pathway	0	165.6	348.1	89.4	234.5	75.2	102.2	26.7	41.1	192.9	158.1	57.8	67.3	52.7	31.2	126.5	62.7	117.3	44.6
TRUE	High	Master Protein	Q16555	Dihydropyrimidinase-related protein 2 OS=Homo sapiens OX=9606 GN=DPYSL2 PE=1 SV=1	0	FALSE	366.696	79	31	1561	2	1	572	62.3	6.38	33606	2737.79	31	29	cell differentiation;cell organization and biogenesis;cellular component movement;development;metabolic process;regulation of biological process;response to stimulus;transport	cytoplasm;cytoskeleton;cytosol;membrane	catalytic activity;protein binding	Pf01979, Pf07969, Pf13147, Pf13594	1808	ENSG00000092964.17	DPYSL2	8	hsa04360	Axon guidance	Brain-Derived Neurotrophic Factor (BDNF) signaling pathway; Regulation of Microtubule Cytoskeleton	0	34.3	23.2	2.4	8.9	25.3	32.2	40.3	27.3	13.6	40.3	31.3	20.1	12.5	391.6	4.6	1.6	6.3	41.2
TRUE	High	Master Protein	P68032	Actin, alpha cardiac muscle 1 OS=Homo sapiens OX=9606 GN=ACTC1 PE=1 SV=1	0	FALSE	365.338	83	39	2056	2	1	377	42	5.39	39988	2985.56	38	34	cell death;cell organization and biogenesis;cellular component movement;regulation of biological process;response to stimulus	cytoplasm;cytoskeleton;cytosol;membrane	catalytic activity;nucleotide binding;protein binding	Pf00022	70	ENSG00000159251.6	ACTC1	15	hsa04261; hsa04260; hsa05414; hsa05410	Adrenergic signaling in cardiomyocytes; Cardiac muscle contraction; Dilated cardiomyopathy; Hypertrophic cardiomyopathy (HCM)	Myometrial Relaxation and Contraction Pathways; Striated Muscle Contraction; Cardiac Progenitor Differentiation	15	184.3	106.7	67.1	104.5	40.9	83.7	61.5	66.3	67.8	79.6	14.3	29.1	256.9	198.3	120	40.4	188.9	128.2
TRUE	High	Master Protein	Q71U36	Tubulin alpha-1A chain OS=Homo sapiens OX=9606 GN=TUBA1A PE=1 SV=1	0	FALSE	363.657	79	31	4056	1	1	451	50.1	5.06	100092	6713.62	31	26	cell division;cell organization and biogenesis;regulation of biological process;transport	cytoplasm;cytoskeleton;cytosol;endosome;membrane;nucleus	catalytic activity;nucleotide binding;protein binding;structural molecule activity	Pf00091, Pf03953	7846	ENSG00000167552.13	TUBA1A	12	hsa05130; hsa04145; hsa04210; hsa04540	Pathogenic Escherichia coli infection; Phagosome; Apoptosis; Gap junction	Parkin-Ubiquitin Proteasomal System pathway; Pathogenic Escherichia coli infection	33	127	89.8	78.8	162.1	129.9	238.6	80.5	84.5	101.9	196.7	116.8	33.7	98.8	33.1	100.9	182.3	68.3	68.8
TRUE	High	Master Protein	P02671	Fibrinogen alpha chain OS=Homo sapiens OX=9606 GN=FGA PE=1 SV=2	0	FALSE	362.705	42	41	1668	41	1	866	94.9	6.01	31855	2512.03	40	35	cell organization and biogenesis;coagulation;defense response;metabolic process;regulation of biological process;response to stimulus;transport	cell surface;extracellular;membrane;organelle lumen	metal ion binding;protein binding;structural molecule activity	Pf00147, Pf02414, Pf08702, Pf12160	2243	ENSG00000171560.14	FGA	4	hsa04610; hsa04611	Complement and coagulation cascades; Platelet activation	Blood Clotting Cascade; VEGFA-VEGFR2 Signaling Pathway	0	82.5	15.8	114.8	10.7	112.6	28.4	40.3	72.4	20	45.2	125.5	157.3	33.8	79.5	465.7	36.5	226.7	99.2
TRUE	High	Master Protein	Q6ZMP0	Thrombospondin type-1 domain-containing protein 4 OS=Homo sapiens OX=9606 GN=THSD4 PE=2 SV=2	0	FALSE	360.979	51	41	539	41	1	1018	112.4	7.65	10457	928.15	41	39	cell organization and biogenesis;metabolic process	extracellular	catalytic activity	Pf00090, Pf05986, Pf08686	79875	ENSG00000187720.14	THSD4	15				0	188.6	24.2	30	97.8	10.7	211.8	21	25.6	122	650	107.9	43.3	62.6	20.8	107.2	16.2	60.5	27.7
TRUE	High	Master Protein	A0A0G2JPR0	Complement C4-A OS=Homo sapiens OX=9606 GN=C4A PE=1 SV=1	0	FALSE	359.335	51	72	646	12	1	1744	192.8	7.03		2360.58		72	defense response;metabolic process;regulation of biological process;response to stimulus	extracellular	enzyme regulator activity;protein binding	Pf00207, Pf01759, Pf01821, Pf01835, Pf07677, Pf07678, Pf07703, Pf10569, Pf11974, Pf13249		ENSG00000244207.8	LOC100294156	CHR_HSCHR6_MHC_DBB_CTG1				0	14.1	65.2	64.9	23.7	17.6	30.9	88.9	95.2	38	29.8	37.5	179.8	126.4	235.6	88.7	37.3	33.9	70.8
TRUE	High	Master Protein	Q13509	Tubulin beta-3 chain OS=Homo sapiens OX=9606 GN=TUBB3 PE=1 SV=2	0	FALSE	358.375	71	29	2214	9	1	450	50.4	4.93	50015	3563.76	29	27	cell organization and biogenesis;cellular component movement	cytoplasm;cytoskeleton;nucleus	catalytic activity;nucleotide binding;protein binding;structural molecule activity	Pf00091, Pf03953, Pf10644	10381	ENSG00000258947.6	TUBB3	16	hsa04540; hsa04145; hsa05130	Gap junction; Phagosome; Pathogenic Escherichia coli infection	Exercise-induced Circadian Regulation; Pathogenic Escherichia coli infection; Parkin-Ubiquitin Proteasomal System pathway	3	331.7	85.3	60.7	63.8	168.6	147.6	91.4	65.5	69.5	93.5	138.5	31.5	42.3	17.5	41.7	189.2	92.5	58.4
TRUE	High	Master Protein	P00558	Phosphoglycerate kinase 1 OS=Homo sapiens OX=9606 GN=PGK1 PE=1 SV=3	0	FALSE	351.924	81	37	2060	37	1	417	44.6	8.1	45974	3803.46	37	32	cell differentiation;metabolic process;regulation of biological process;response to stimulus	cytoplasm;cytosol;membrane	catalytic activity;nucleotide binding;protein binding	Pf00162	5230	ENSG00000102144.13	PGK1	X	hsa04066; hsa00010; hsa01230; hsa01100; hsa01200	HIF-1 signaling pathway; Glycolysis / Gluconeogenesis; Biosynthesis of amino acids; Metabolic pathways; Carbon metabolism	Photodynamic therapy-induced HIF-1 survival signaling; Cori Cycle; Glycolysis and Gluconeogenesis	0	158.6	116.7	99	156.2	99	114.3	122.7	94.7	102	128.2	100.1	75.6	88.9	43	146.2	95.9	60.9	50.6
TRUE	High	Master Protein	P06733	Alpha-enolase OS=Homo sapiens OX=9606 GN=ENO1 PE=1 SV=2	0	FALSE	347.862	74	34	4223	29	1	434	47.1	7.39	103783	6834.64	32	33	metabolic process;regulation of biological process;response to stimulus	cell surface;cytoplasm;cytosol;membrane;nucleus	catalytic activity;DNA binding;metal ion binding;protein binding;RNA binding	Pf00113, Pf03952, Pf13378	2023	ENSG00000074800.13	ENO1	1	hsa01100; hsa00010; hsa01230; hsa01200; hsa03018; hsa04066	Metabolic pathways; Glycolysis / Gluconeogenesis; Biosynthesis of amino acids; Carbon metabolism; RNA degradation; HIF-1 signaling pathway	Glycolysis and Gluconeogenesis	5	125.7	129	138.4	137.6	132	120.7	104.7	86.7	152	183.2	125.9	96.1	93.7	153.2	86	91.5	100.8	64.2
TRUE	High	Master Protein	P05023	Sodium/potassium-transporting ATPase subunit alpha-1 OS=Homo sapiens OX=9606 GN=ATP1A1 PE=1 SV=1	0	FALSE	346.685	48	44	1432	29	1	1023	112.8	5.49	33481	2314.2	41	41	cell communication;cellular homeostasis;metabolic process;regulation of biological process;response to stimulus;transport	endoplasmic reticulum;endosome;Golgi;membrane	catalytic activity;metal ion binding;nucleotide binding;protein binding;transporter activity	Pf00122, Pf00689, Pf00690, Pf00702, Pf08282, Pf12710, Pf13246	476	ENSG00000163399.15	ATP1A1	1	hsa04976; hsa04978; hsa04971; hsa04261; hsa04974; hsa04260; hsa04960; hsa04919; hsa04022; hsa04918; hsa04024; hsa04911; hsa04970; hsa04964; hsa04973; hsa04961; hsa04972	Bile secretion; Mineral absorption; Gastric acid secretion; Adrenergic signaling in cardiomyocytes; Protein digestion and absorption; Cardiac muscle contraction; Aldosterone-regulated sodium reabsorption; Thyroid hormone signaling pathway; cGMP-PKG signaling pathway; Thyroid hormone synthesis; cAMP signaling pathway; Insulin secretion; Salivary secretion; Proximal tubule bicarbonate reclamation; …	Preimplantation Embryo	14	207.9	120.9	61.4	157	74.1	139.5	26.3	22.5	135.7	170.1	118.3	50.9	107.8	13.4	123.4	150.9	32.1	64.5
TRUE	High	Master Protein	Q9BQE3	Tubulin alpha-1C chain OS=Homo sapiens OX=9606 GN=TUBA1C PE=1 SV=1	0	FALSE	344.772	79	31	3820	2	1	449	49.9	5.1	95616	6188.37	31	26	cell division;cell organization and biogenesis;transport	cytoplasm;cytoskeleton;nucleus	catalytic activity;nucleotide binding;protein binding;structural molecule activity	Pf00091, Pf03953	84790	ENSG00000167553.15	TUBA1C	12	hsa04145; hsa05130; hsa04210; hsa04540	Phagosome; Pathogenic Escherichia coli infection; Apoptosis; Gap junction	Pathogenic Escherichia coli infection; Parkin-Ubiquitin Proteasomal System pathway	1	132.6	119.5	249.6	284.8	108.3	289.8	110.8	76.3	170.6	214.9	178.7	16.3	54.2	36.5	118.1	128.4	29.5	59
TRUE	High	Master Protein	P00747	Plasminogen OS=Homo sapiens OX=9606 GN=PLG PE=1 SV=2	0	FALSE	340.828	65	41	510	41	1	810	90.5	7.24	9338	859.82	40	34	cell differentiation;cell organization and biogenesis;cellular component movement;cellular homeostasis;coagulation;metabolic process;regulation of biological process;transport	cell surface;extracellular;membrane;organelle lumen	catalytic activity;protein binding	Pf00024, Pf00051, Pf00089, Pf09342, Pf13365	5340	ENSG00000122194.18	PLG	6	hsa05150; hsa04080; hsa05164; hsa04610	Staphylococcus aureus infection; Neuroactive ligand-receptor interaction; Influenza A; Complement and coagulation cascades	Complement and Coagulation Cascades; Selenium Micronutrient Network; Vitamin B12 Metabolism; Folate Metabolism; Blood Clotting Cascade	0	55.8	52.1	267.6	51.5	73.1	116.4	74.7	122	86.3	64.3	183.6	104.3	96.1	159.4	134.7	70.8	104	211.5
TRUE	High	Master Protein	P53621	Coatomer subunit alpha OS=Homo sapiens OX=9606 GN=COPA PE=1 SV=2	0	FALSE	340.395	54	50	643	50	1	1224	138.3	7.66	9457	902.24	50	47	regulation of biological process;transport	cytoplasm;cytosol;extracellular;Golgi;membrane	protein binding;structural molecule activity	Pf00400, Pf04053, Pf06957	1314	ENSG00000122218.14	COPA	1				0	141	142.9	66.7	190.6	72.5	124.4	92.2	71.7	127.8	149.3	107.8	116.4	92.9	30.4	168.5	196.2	65	49.8
TRUE	High	Master Protein	P62736	Actin, aortic smooth muscle OS=Homo sapiens OX=9606 GN=ACTA2 PE=1 SV=1	0	FALSE	338.103	83	37	1820	1	1	377	42	5.39	35357	2732.08	36	33	regulation of biological process;response to stimulus	cytoplasm;cytoskeleton;cytosol	nucleotide binding;protein binding	Pf00022	59	ENSG00000107796.13	ACTA2	10	hsa04270	Vascular smooth muscle contraction	Myometrial Relaxation and Contraction Pathways; Striated Muscle Contraction	0	39.1	48.3	59.2	60	42.3	32.3	78.6	51.7	38.5	41.4	29.3	27.1	728.5	456.3	41	51	15.8	108.4
TRUE	High	Master Protein	Q9P2E9	Ribosome-binding protein 1 OS=Homo sapiens OX=9606 GN=RRBP1 PE=1 SV=5	0	FALSE	337.766	39	44	716	43	1	1410	152.4	8.6	16070	1296.36	41	42												1	155.9	128.3	65.8	208.1	53.1	241.5	106.3	70.2	153.4	255.1	107.5	111.4	54.5	52.1	82.2	154.5	73.7	68.2
TRUE	High	Master Protein	P09493	Tropomyosin alpha-1 chain OS=Homo sapiens OX=9606 GN=TPM1 PE=1 SV=2	0	FALSE	337.458	80	36	1063	4	1	284	32.7	4.74	18130	1708.09	36	36	cell organization and biogenesis;cellular component movement;regulation of biological process;response to stimulus	cytoplasm;cytoskeleton;cytosol	protein binding;structural molecule activity	Pf00261, Pf12718	7168	ENSG00000140416.19	TPM1	15	hsa04260; hsa05410; hsa05414; hsa05206; hsa04261	Cardiac muscle contraction; Hypertrophic cardiomyopathy (HCM); Dilated cardiomyopathy; MicroRNAs in cancer; Adrenergic signaling in cardiomyocytes	Striated Muscle Contraction	2	161.4	152.4	39.6	58.8	106.1	158.8	91.6	86.8	89	183.2	14.4	43.6	168.3	168.7	61.7	36.4	243.2	103.3
TRUE	High	Master Protein	Q99798	Aconitate hydratase, mitochondrial OS=Homo sapiens OX=9606 GN=ACO2 PE=1 SV=2	0	FALSE	330.734	54	39	990	39	1	780	85.4	7.61	19957	1611.85	39	37	metabolic process;response to stimulus	mitochondrion;organelle lumen	catalytic activity;metal ion binding	Pf00330, Pf00694	50	ENSG00000100412.15	ACO2	22	hsa00630; hsa01200; hsa01210; hsa01100; hsa01230; hsa00020	Glyoxylate and dicarboxylate metabolism; Carbon metabolism; 2-Oxocarboxylic acid metabolism; Metabolic pathways; Biosynthesis of amino acids; Citrate cycle (TCA cycle)	TCA Cycle; Amino Acid metabolism	0	120.6	167.6	126.9	170.1	84	130.3	103.7	107.4	95.5	109.7	94.8	56.3	56.9	29.3	71.2	153.6	63.8	39.4
TRUE	High	Master Protein	P55268	Laminin subunit beta-2 OS=Homo sapiens OX=9606 GN=LAMB2 PE=1 SV=2	0	FALSE	327.833	46	49	715	49	1	1798	195.9	6.52	13481	1073.14	48	40	cell growth;cell organization and biogenesis;cellular component movement;metabolic process;regulation of biological process;transport	cytoplasm;extracellular;Golgi;organelle lumen	catalytic activity;motor activity;nucleotide binding;protein binding;structural molecule activity;transporter activity	Pf00053, Pf00055, Pf00430, Pf00769, Pf01576, Pf02050, Pf02841, Pf04111, Pf06008, Pf09831, Pf12128, Pf12795, Pf13514, Pf13851, Pf13868, Pf15070, Pf15558	3913	ENSG00000172037.13	LAMB2	3	hsa05145; hsa05222; hsa05200; hsa04512; hsa04151; hsa04510; hsa05146	Toxoplasmosis; Small cell lung cancer; Pathways in cancer; ECM-receptor interaction; PI3K-Akt signaling pathway; Focal adhesion; Amoebiasis	Focal Adhesion-PI3K-Akt-mTOR-signaling pathway; Primary Focal Segmental Glomerulosclerosis FSGS; Inflammatory Response Pathway; Alpha 6 Beta 4 signaling pathway; miRNA targets in ECM and membrane receptors; Focal Adhesion	0	136	75.5	122.9	125.7	64.5	119.3	86.7	112.3	68.2	74.8	86.1	76.9	86.2	31.8	85.1	72.3	107.8	48.4
TRUE	High	Master Protein	P04075	Fructose-bisphosphate aldolase A OS=Homo sapiens OX=9606 GN=ALDOA PE=1 SV=2	0	FALSE	326.528	83	29	1321	26	1	364	39.4	8.09	24340	2389.5	29	24	cell organization and biogenesis;cellular homeostasis;metabolic process;regulation of biological process;transport	cytoplasm;cytoskeleton;cytosol;extracellular;membrane;nucleus;organelle lumen	catalytic activity;protein binding;RNA binding	Pf00274	226	ENSG00000149925.17	ALDOA	16	hsa00010; hsa01200; hsa01230; hsa00051; hsa01100; hsa00030; hsa04066	Glycolysis / Gluconeogenesis; Carbon metabolism; Biosynthesis of amino acids; Fructose and mannose metabolism; Metabolic pathways; Pentose phosphate pathway; HIF-1 signaling pathway	Glycolysis and Gluconeogenesis; Sudden Infant Death Syndrome (SIDS) Susceptibility Pathways	3	143.2	103.3	58.1	150.3	69.5	129.5	114.7	159.7	78.7	212.7	107.6	66	87.3	33.4	179.1	51	60.7	61.6
TRUE	High	Master Protein	P35221	Catenin alpha-1 OS=Homo sapiens OX=9606 GN=CTNNA1 PE=1 SV=1	0	FALSE	326.195	60	41	751	36	1	906	100	6.29	16726	1337.86	41	37	cell organization and biogenesis;regulation of biological process;response to stimulus	cytoplasm;cytoskeleton;cytosol;Golgi;membrane	protein binding;RNA binding;structural molecule activity	Pf01044	1495	ENSG00000044115.20	CTNNA1	5	hsa04530; hsa05213; hsa04670; hsa05200; hsa04390; hsa05412; hsa05100; hsa04520	Tight junction; Endometrial cancer; Leukocyte transendothelial migration; Pathways in cancer; Hippo signaling pathway; Arrhythmogenic right ventricular cardiomyopathy (ARVC); Bacterial invasion of epithelial cells; Adherens junction	VEGFA-VEGFR2 Signaling Pathway; Arrhythmogenic Right Ventricular Cardiomyopathy; Apoptosis-related network due to altered Notch3 in ovarian cancer; White fat cell differentiation	5	230.9	236.5	91.4	217.9	186.1	148.3	75.4	112.7	147.2	147	153	30.1	175.2	18.6	77.4	54.6	57.9	110.6
TRUE	High	Master Protein	P02679	Fibrinogen gamma chain OS=Homo sapiens OX=9606 GN=FGG PE=1 SV=3	0	FALSE	323.392	64	31	1570	31	1	453	51.5	5.62	31535	2881.25	31	29	cell organization and biogenesis;coagulation;metabolic process;regulation of biological process;response to stimulus;transport	cell surface;cytoplasm;extracellular;membrane;organelle lumen	catalytic activity;metal ion binding;protein binding;structural molecule activity	Pf00147, Pf08317, Pf08702, Pf15397	2266	ENSG00000171557.16	FGG	4	hsa04610; hsa05150; hsa04611	Complement and coagulation cascades; Staphylococcus aureus infection; Platelet activation	Blood Clotting Cascade; VEGFA-VEGFR2 Signaling Pathway	0	93	24.3	134.4	3.5	82.8	32.1	51.1	77.2	12.8	43.9	174.2	146.6	26.5	139.8	513.2	45.2	169.3	140.7
TRUE	High	Master Protein	Q14764	Major vault protein OS=Homo sapiens OX=9606 GN=MVP PE=1 SV=4	0	FALSE	321.79	64	43	793	43	1	893	99.3	5.48	12715	1169.19	43	41	regulation of biological process;response to stimulus;transport	cytoplasm;cytoskeleton;cytosol;extracellular;membrane;nucleus;organelle lumen	protein binding	Pf01145, Pf01505, Pf11978	9961	ENSG00000013364.18	MVP	16				0	140.8	151.7	335.2	83.2	63.5	92.1	73.8	78.8	118.6	122	130.3	60.4	100	21.5	76.5	47.9	40.9	46.8
TRUE	High	Master Protein	Q7Z6Z7	E3 ubiquitin-protein ligase HUWE1 OS=Homo sapiens OX=9606 GN=HUWE1 PE=1 SV=3	0	FALSE	320.904	21	56	369	56	1	4374	481.6	5.22	6892	570.02	53	45	cell differentiation;cell organization and biogenesis;metabolic process;response to stimulus;transport	cytoplasm;cytosol;extracellular;membrane;nucleus;organelle lumen	catalytic activity;DNA binding;protein binding;RNA binding	Pf00632, Pf02825, Pf06012, Pf06025, Pf14377	10075	ENSG00000086758.15	HUWE1	X	hsa04120	Ubiquitin mediated proteolysis		0	141.1	199.5	101.6	231.8	98.7	215.6	117.4	83.6	151.6	183.2	110.2	33.8	61.8	30.9	45.8	86.9	96.8	23.4
TRUE	High	Master Protein	P02647	Apolipoprotein A-I OS=Homo sapiens OX=9606 GN=APOA1 PE=1 SV=1	0	FALSE	320.834	77	38	1904	38	1	267	30.8	5.76	37650	3024.15	38	33	cell organization and biogenesis;cell proliferation;cellular component movement;metabolic process;regulation of biological process;response to stimulus;transport	cell surface;cytosol;endosome;extracellular;membrane;nucleus;organelle lumen	enzyme regulator activity;protein binding;transporter activity	Pf01442	335	ENSG00000118137.9	APOA1	11	hsa04975; hsa04977; hsa05143; hsa03320	Fat digestion and absorption; Vitamin digestion and absorption; African trypanosomiasis; PPAR signaling pathway	Folate Metabolism; PPAR Alpha Pathway; Statin Pathway; Selenium Micronutrient Network; PPAR signaling pathway; Vitamin B12 Metabolism	0	49.4	36.1	87.4	73.1	81.1	117.3	70.4	62.4	57.8	91	100.4	47.6	76.2	373	40.2	61	87.9	220.4
TRUE	High	Master Protein	P20774	Mimecan OS=Homo sapiens OX=9606 GN=OGN PE=1 SV=1	0	FALSE	315.87	55	29	2260	29	1	298	33.9	5.63	51592	4216.74	29	28	cell organization and biogenesis;metabolic process;regulation of biological process	extracellular;organelle lumen	protein binding	Pf12799, Pf13855	4969	ENSG00000106809.10	OGN	9				0	139.4	32.6	144.5	20.1	6.3	15.3	21.4	45.3	13.5	46.9	32.9	15.7	440.9	491.5	55.5	11.3	57	281.6
TRUE	High	Master Protein	P42704	Leucine-rich PPR motif-containing protein, mitochondrial OS=Homo sapiens OX=9606 GN=LRPPRC PE=1 SV=3	0	FALSE	315.654	50	49	471	49	1	1394	157.8	6.13	8501	572.51	46	44	cellular component movement;metabolic process;regulation of biological process;transport	chromosome;cytoplasm;cytoskeleton;membrane;mitochondrion;nucleus	catalytic activity;DNA binding;protein binding;RNA binding	Pf12854, Pf13041, Pf13812	10128	ENSG00000138095.18	LRPPRC	2				0	109.1	98.2	67.7	132.6	71.6	89.5	49.3	291.6	54.3	82	162.5	62.7	24.7	44.6	93.4	114.5	51	36.3
TRUE	High	Master Protein	P07099	Epoxide hydrolase 1 OS=Homo sapiens OX=9606 GN=EPHX1 PE=1 SV=1	0	FALSE	312.506	71	35	841	35	1	455	52.9	7.25	15677	1408.29	33	29	metabolic process;response to stimulus	endoplasmic reticulum;membrane	catalytic activity;protein binding	Pf00561, Pf06441, Pf12697	2052	ENSG00000143819.12	EPHX1	1	hsa04976; hsa00980; hsa05204	Bile secretion; Metabolism of xenobiotics by cytochrome P450; Chemical carcinogenesis	Metapathway biotransformation; Benzo(a)pyrene metabolism; Photodynamic therapy-induced NFE2L2 (NRF2) survival signaling; Aflatoxin B1 metabolism; Benzene metabolism	0	136.3	84.5	38.8	100.7	71.6	203.2	52.6	56.1	56.4	38.7	42.6	33.9	38.4	11.1	73.1	12	35.9	23.4
TRUE	High	Master Protein	Q08211	ATP-dependent RNA helicase A OS=Homo sapiens OX=9606 GN=DHX9 PE=1 SV=4	0	FALSE	311.659	48	42	713	42	1	1270	140.9	6.84	14153	1005.06	42	37	cell death;cell differentiation;cell organization and biogenesis;defense response;metabolic process;regulation of biological process;response to stimulus;transport	cytoplasm;cytoskeleton;cytosol;membrane;nucleus;ribosome	catalytic activity;DNA binding;metal ion binding;nucleotide binding;protein binding;RNA binding	Pf00035, Pf00270, Pf00271, Pf04408, Pf07717	1660	ENSG00000135829.16	DHX9	1			mRNA Processing	0	161.2	149.6	48.4	198.7	102.1	141.2	156.5	80.6	103.2	163	82.9	157.3	74.3	34.6	108.2	147.3	84	43
TRUE	High	Master Protein	P50395	Rab GDP dissociation inhibitor beta OS=Homo sapiens OX=9606 GN=GDI2 PE=1 SV=2	0	FALSE	310.777	80	35	1327	24	1	445	50.6	6.47	30868	2487.91	34	34	metabolic process;regulation of biological process;response to stimulus;transport	cytoplasm;cytosol;extracellular;membrane;organelle lumen	catalytic activity;enzyme regulator activity;protein binding;RNA binding	Pf00996	2665	ENSG00000057608.16	GDI2	10				11	164.4	172.2	121.8	140.3	132.8	126.2	92.1	78.2	181.5	120.4	154.8	75.3	86.9	51.6	63.9	136.4	97.2	64.3
TRUE	High	Master Protein	Q92616	eIF-2-alpha kinase activator GCN1 OS=Homo sapiens OX=9606 GN=GCN1 PE=1 SV=6	0	FALSE	307.967	32	59	430	59	1	2671	292.6	7.47	7380	528.63	58	40	cell communication;metabolic process;regulation of biological process;response to stimulus	cytoplasm;cytosol;membrane;ribosome	enzyme regulator activity;protein binding;RNA binding	Pf12074, Pf13646	10985		GCN1L1; GCN1	12				0	101.9	152.5	149.5	134.9	94.1	123.6	392.3	223.9	73.3	91.3	166.1	20.1	31.3	17.7	75.4	71.2	51.3	40.3
TRUE	High	Master Protein	Q14195	Dihydropyrimidinase-related protein 3 OS=Homo sapiens OX=9606 GN=DPYSL3 PE=1 SV=1	0	FALSE	300.952	77	28	956	24	1	570	61.9	6.49	17816	1541.54	28	28	cell organization and biogenesis;regulation of biological process;response to stimulus	cytoplasm;cytosol	catalytic activity;protein binding	Pf01979, Pf04909, Pf13147, Pf13594	1809	ENSG00000113657.12	DPYSL3	5				1	279.3	102.4	55.6	77.6	84.3	189.1	24.7	39.1	107.4	211.7	110.3	43.7	111.5	47.9	161.4	47.5	74.4	76.4
TRUE	High	Master Protein	Q99959	Plakophilin-2 OS=Homo sapiens OX=9606 GN=PKP2 PE=1 SV=2	0	FALSE	299.688	50	33	433	32	1	881	97.4	9.33	8596	812.24	32	31	cell communication;cell death;cell organization and biogenesis;regulation of biological process	cytoskeleton;membrane;nucleus	protein binding;structural molecule activity		5318	ENSG00000057294.14	PKP2	12	hsa05412	Arrhythmogenic right ventricular cardiomyopathy (ARVC)	Arrhythmogenic Right Ventricular Cardiomyopathy	1	132.3	231	108.8	126.9	40.1	47.6	180.2	306	177.4	128.3	71.6	149.6	70.9	16.2	97.3	39.2	108	39.9
TRUE	High	Master Protein	O00468	Agrin OS=Homo sapiens OX=9606 GN=AGRN PE=1 SV=5	0	FALSE	299.447	34	46	422	46	1	2067	217.1	6.39	8795	612.06	45	43	cell differentiation;cell organization and biogenesis;development;metabolic process;regulation of biological process;response to stimulus	cytosol;extracellular;membrane;organelle lumen	metal ion binding;protein binding;structural molecule activity	Pf00050, Pf00053, Pf00054, Pf01390, Pf02210, Pf03146, Pf07648	375790		AGRN	1	hsa04512	ECM-receptor interaction	Primary Focal Segmental Glomerulosclerosis FSGS	0	133.5	60.7	71.8	62.8	43.4	106.9	76.8	100.8	48.4	58.6	86	38.7	75.9	24.1	127.1	118.7	73.5	29.2
TRUE	High	Master Protein	Q86UP2	Kinectin OS=Homo sapiens OX=9606 GN=KTN1 PE=1 SV=1	0	FALSE	297.68	43	45	520	45	1	1357	156.2	5.64	8491	855.2	42	39	cellular component movement;metabolic process	endoplasmic reticulum;membrane;organelle lumen	protein binding;RNA binding		3895	ENSG00000126777.17	KTN1	14				0	176.7	170	57	181.2	116.8	216.7	59.5	92.9	115.9	147	128	45	63.4	17.1	76.3	59.6	117.6	47.3
TRUE	High	Master Protein	Q9BUF5	Tubulin beta-6 chain OS=Homo sapiens OX=9606 GN=TUBB6 PE=1 SV=1	0	FALSE	297.637	82	27	1770	12	1	446	49.8	4.88	32347	2760.32	26	27	cell organization and biogenesis	cytoplasm;cytoskeleton;nucleus	catalytic activity;nucleotide binding;structural molecule activity	Pf00091, Pf03953, Pf10644	84617	ENSG00000176014.12	TUBB6	18	hsa05130; hsa04145; hsa04540	Pathogenic Escherichia coli infection; Phagosome; Gap junction	Parkin-Ubiquitin Proteasomal System pathway; Pathogenic Escherichia coli infection	0	113.1	229	82.5	163.3	75.6	228.2	190.6	74.3	80.7	201.5	158.4	60.1	51.8	27.7	29.4	241.6	207.8	105.4
TRUE	High	Master Protein	P21980	Protein-glutamine gamma-glutamyltransferase 2 OS=Homo sapiens OX=9606 GN=TGM2 PE=1 SV=2	0	FALSE	296.527	68	35	724	35	1	687	77.3	5.22	14898	1114.61	34	34	cell organization and biogenesis;cellular homeostasis;metabolic process;regulation of biological process;response to stimulus;transport	cytoplasm;cytosol;endoplasmic reticulum;membrane;mitochondrion	catalytic activity;metal ion binding;nucleotide binding;protein binding	Pf00868, Pf00927, Pf01841	7052	ENSG00000198959.11	TGM2	20	hsa05016	Huntington's disease		0	120.8	24.6	214.8	55.9	46.4	664.3	55.7	56.1	94.1	149.8	85.6	29.4	82.6	121.5	138	43.3	80.7	29.9
TRUE	High	Master Protein	Q9NZM1	Myoferlin OS=Homo sapiens OX=9606 GN=MYOF PE=1 SV=1	0	FALSE	296.494	32	53	368	52	1	2061	234.6	6.18	6179	499.82	49	46	cell organization and biogenesis;regulation of biological process;response to stimulus	membrane;nucleus	protein binding	Pf00168, Pf08150, Pf08151, Pf08165	26509	ENSG00000138119.16	MYOF	10			Hepatitis C and Hepatocellular Carcinoma; Aryl Hydrocarbon Receptor Pathway	1	16.3	11.5	10.1	20.9	28.8	26	55.7	38.8	57.4	16.4	65.9	40.4	26.7	214.6	29.3	45.6	166.5	15.2
TRUE	High	Master Protein	P67936	Tropomyosin alpha-4 chain OS=Homo sapiens OX=9606 GN=TPM4 PE=1 SV=3	0	FALSE	290.369	78	33	1301	14	1	248	28.5	4.69	24829	2254.28	33	29	cell differentiation;cell organization and biogenesis;cellular component movement	cytoplasm;cytoskeleton;cytosol;membrane	metal ion binding;protein binding;structural molecule activity	Pf00261, Pf12718	7171	ENSG00000167460.14	TPM4	19	hsa05410; hsa05414; hsa04261; hsa04260	Hypertrophic cardiomyopathy (HCM); Dilated cardiomyopathy; Adrenergic signaling in cardiomyocytes; Cardiac muscle contraction	Striated Muscle Contraction	12	101.4	149.1	8.6	111.3	75	139.5	197.2	83.1	196.3	162.4	57.8	76.3	177.7	97.3	57.9	40.6	59.4	57.2
TRUE	High	Master Protein	P27824	Calnexin OS=Homo sapiens OX=9606 GN=CANX PE=1 SV=2	0	FALSE	289.846	59	33	1031	32	1	592	67.5	4.6	20766	1706.46	32	29	metabolic process;regulation of biological process;response to stimulus;transport	cytoplasm;endoplasmic reticulum;membrane;organelle lumen;ribosome	metal ion binding;protein binding;RNA binding	Pf00262	821	ENSG00000127022.14; ENSG00000283777.1	CANX	5; CHR_HG30_PATCH	hsa04141; hsa04918; hsa05166; hsa04612; hsa04145	Protein processing in endoplasmic reticulum; Thyroid hormone synthesis; HTLV-I infection; Antigen processing and presentation; Phagosome		1	79.9	106.8	39.2	189.5	100.5	152.9	179.7	171.5	103.8	183.3	92.7	115.8	85.2	39.3	101	311.5	114	56.7
TRUE	High	Master Protein	P0DOX5	Immunoglobulin gamma-1 heavy chain OS=Homo sapiens OX=9606 PE=1 SV=1	0	FALSE	289.709	51	20	1515	11	1	449	49.3	8.72	54250		20		response to stimulus	extracellular;membrane		Pf07654, Pf07686, Pf08205								11	55.4	36.9	72.5	83	57.6	43.4	74.9	106.9	56.2	37.9	64.1	116.7	177	277.2	51	57.2	56.3	226.7
TRUE	High	Master Protein	P68104	Elongation factor 1-alpha 1 OS=Homo sapiens OX=9606 GN=EEF1A1 PE=1 SV=1	0	FALSE	289.465	73	28	1889	16	1	462	50.1	9.01	33231	3500.43	28	23	metabolic process;regulation of biological process;response to stimulus;transport	cytoplasm;cytoskeleton;cytosol;extracellular;membrane;nucleus;organelle lumen	catalytic activity;nucleotide binding;protein binding;RNA binding	Pf00009, Pf03143, Pf03144	1915	ENSG00000156508.17	EEF1A1	6	hsa03013; hsa05134	RNA transport; Legionellosis	Translation Factors	12	123.6	168.8	105.3	233.2	83.1	123.2	95.1	70	149.5	169.7	93	42.3	106.4	32.7	91.7	111	48	43.7
TRUE	High	Master Protein	Q13228	Methanethiol oxidase OS=Homo sapiens OX=9606 GN=SELENBP1 PE=1 SV=2	0	FALSE	289.426	83	35	1071	35	1	472	52.4	6.37	20490	1607.81	34	33	transport	cytoplasm;cytosol;membrane;nucleus	protein binding	Pf05694, Pf10282	8991	ENSG00000143416.20	SELENBP1	1			Selenium Metabolism and Selenoproteins; IL1 and megakaryocytes in obesity	0	36.8	132.6	58.5	132.1	75.7	71.5	44.4	26.8	176.5	139.8	91.7	66.4	48.2	24.3	103	38	57.6	41.6
TRUE	High	Master Protein	P13010	X-ray repair cross-complementing protein 5 OS=Homo sapiens OX=9606 GN=XRCC5 PE=1 SV=3	0	FALSE	289.288	58	38	694	38	1	732	82.7	5.81	12650	1083.12	37	35	cell differentiation;cell organization and biogenesis;cell proliferation;defense response;metabolic process;regulation of biological process;response to stimulus;transport	chromosome;cytoplasm;cytosol;extracellular;membrane;nucleus;organelle lumen	catalytic activity;DNA binding;enzyme regulator activity;nucleotide binding;protein binding;RNA binding	Pf02735, Pf03730, Pf03731, Pf08785	7520	ENSG00000079246.15	XRCC5	2	hsa03450	Non-homologous end-joining	Non-homologous end joining	0	146.3	165.1	85	177.4	117.5	84.2	86.6	76.4	113.1	127	96.8	73.5	64.9	44.5	85.6	147.3	139.2	47
TRUE	High	Master Protein	Q86VP6	Cullin-associated NEDD8-dissociated protein 1 OS=Homo sapiens OX=9606 GN=CAND1 PE=1 SV=2	0	FALSE	288.599	52	44	987	42	1	1230	136.3	5.78	17603	1386.89	42	41	cell differentiation;cell organization and biogenesis;cellular homeostasis;metabolic process;regulation of biological process;transport	cytoplasm;cytosol;extracellular;Golgi;membrane;nucleus;organelle lumen	protein binding	Pf08623, Pf12755, Pf13513	55832	ENSG00000111530.12	CAND1	12			Endoderm Differentiation	2	133.2	186.7	115.4	191	131.2	153.9	78.2	113.2	154.1	121.8	147.5	56.7	74	22.8	87.9	132.9	98.9	48.3
TRUE	High	Master Protein	P11047	Laminin subunit gamma-1 OS=Homo sapiens OX=9606 GN=LAMC1 PE=1 SV=3	0	FALSE	288.48	34	42	712	42	1	1609	177.5	5.12	14587	1059.78	42	39	cell organization and biogenesis;cellular component movement;metabolic process;regulation of biological process	extracellular;organelle lumen	catalytic activity;motor activity;protein binding;structural molecule activity	Pf00052, Pf00053, Pf00055, Pf00261, Pf01576, Pf05262, Pf05483, Pf05557, Pf05667, Pf05701, Pf06008, Pf08317, Pf10174, Pf11068, Pf12128, Pf12795, Pf13166, Pf13514, Pf13868	3915	ENSG00000135862.5	LAMC1	1	hsa04151; hsa05200; hsa05222; hsa05146; hsa05145; hsa05020; hsa04512; hsa04510	PI3K-Akt signaling pathway; Pathways in cancer; Small cell lung cancer; Amoebiasis; Toxoplasmosis; Prion diseases; ECM-receptor interaction; Focal adhesion	miRNA targets in ECM and membrane receptors; Inflammatory Response Pathway; Alpha 6 Beta 4 signaling pathway; Focal Adhesion-PI3K-Akt-mTOR-signaling pathway; Endoderm Differentiation; Focal Adhesion	0	156.7	74.9	106.9	99	47.1	114.6	80.7	79.1	38.9	81.7	64.2	530.8	112.2	36	73.5	90	170.2	60.4
TRUE	High	Master Protein	P15144	Aminopeptidase N OS=Homo sapiens OX=9606 GN=ANPEP PE=1 SV=4	0	FALSE	287.761	46	41	441	41	1	967	109.5	5.48	7950	649.41	41	40	cell communication;cell differentiation;development;metabolic process;regulation of biological process;response to stimulus;transport	membrane;nucleus	catalytic activity;metal ion binding;receptor activity	Pf01433, Pf10023, Pf11838, Pf13485	290	ENSG00000166825.13	ANPEP	15	hsa04640; hsa00480; hsa01100; hsa04614	Hematopoietic cell lineage; Glutathione metabolism; Metabolic pathways; Renin-angiotensin system	Cardiac Progenitor Differentiation; Glutathione metabolism	0	730.4	103	42.1	136.4	248.2	73.1	44.9	57.6	181.4	99.2	136.6	67.4	36.9	26.7	121.8	47.7	83.5	51.3
TRUE	High	Master Protein	P04040	Catalase OS=Homo sapiens OX=9606 GN=CAT PE=1 SV=3	0	FALSE	287.623	68	34	720	34	1	527	59.7	7.39	14717	1191.58	34	30	cell differentiation;cell organization and biogenesis;metabolic process;regulation of biological process;response to stimulus;transport	cytosol;endoplasmic reticulum;extracellular;Golgi;membrane;mitochondrion;organelle lumen;vacuole	antioxidant activity;catalytic activity;metal ion binding;nucleotide binding;protein binding	Pf00199, Pf06628	847	ENSG00000121691.4	CAT	11	hsa05014; hsa04146; hsa04211; hsa01200; hsa00630; hsa04068; hsa04213; hsa00380	Amyotrophic lateral sclerosis (ALS); Peroxisome; Longevity regulating pathway; Carbon metabolism; Glyoxylate and dicarboxylate metabolism; FoxO signaling pathway; Longevity regulating pathway - multiple species; Tryptophan metabolism	Amyotrophic lateral sclerosis (ALS); Oxidative Stress; Selenium Micronutrient Network; DNA Damage Response (only ATM dependent); Tryptophan metabolism; Folate Metabolism	0	122.3	105.3	101.4	89.9	119.4	82.7	68.6	55.7	76.4	83.7	131.1	190.9	36.3	34.8	126.7	82.1	95.6	67.9
TRUE	High	Master Protein	Q07065	Cytoskeleton-associated protein 4 OS=Homo sapiens OX=9606 GN=CKAP4 PE=1 SV=2	0	FALSE	286.951	62	32	877	32	1	602	66	5.92	20727	1423.44	31	29	metabolic process;transport	cytoplasm;cytoskeleton;cytosol;endoplasmic reticulum;membrane;organelle lumen	RNA binding	Pf13166	10970	ENSG00000136026.13	CKAP4	12	hsa04141	Protein processing in endoplasmic reticulum		0	115.3	120.7	67.7	225.9	56	372.4	97.3	86.7	97.7	256.6	87.4	47.6	31.4	16.7	91.2	75.6	56.2	24.6
TRUE	High	Master Protein	Q01484	Ankyrin-2 OS=Homo sapiens OX=9606 GN=ANK2 PE=1 SV=4	0	FALSE	286.636	15	46	290	23	1	3957	433.4	5.14	5683	391.06	42	36	cell communication;cell organization and biogenesis;cellular homeostasis;regulation of biological process;response to stimulus;transport	cytoplasm;cytoskeleton;cytosol;endosome;membrane;mitochondrion;nucleus;vacuole	protein binding;structural molecule activity	Pf00023, Pf00531, Pf00791, Pf04621, Pf05109, Pf05539, Pf09726, Pf12737, Pf12796, Pf13606, Pf13637, Pf13857, Pf15279, Pf15427, Pf15440, Pf15449	287	ENSG00000145362.17	ANK2	4	hsa05205	Proteoglycans in cancer		20	68.6	91.4	32.7	202.4	137.4	451.5	51.7	50.3	46	196.1	58	49.6	42.3	21	212.5	119.4	55.3	52.6
TRUE	High	Master Protein	P13796	Plastin-2 OS=Homo sapiens OX=9606 GN=LCP1 PE=1 SV=6	0	FALSE	286.339	67	36	774	31	1	627	70.2	5.43	15486	1105.16	35	33	cell organization and biogenesis;cellular component movement;regulation of biological process;response to stimulus	cytoplasm;cytoskeleton;cytosol;membrane	metal ion binding;protein binding	Pf00036, Pf00307, Pf13405, Pf13499	3936	ENSG00000136167.13	LCP1	13				5	88.8	66.6	134.9	188.2	87.9	95.9	64.8	86.4	82.9	155.4	140.4	253.6	64.5	65.2	60.6	316.7	74.3	74.7
TRUE	High	Master Protein	Q9UBG0	C-type mannose receptor 2 OS=Homo sapiens OX=9606 GN=MRC2 PE=1 SV=2	0	FALSE	285.683	36	33	818	33	1	1479	166.6	5.83	17943	1361.76	33	29	cell differentiation;metabolic process;regulation of biological process;response to stimulus;transport	membrane	protein binding;receptor activity;signal transducer activity	Pf00040, Pf00059	9902	ENSG00000011028.13	MRC2	17	hsa04145; hsa05152	Phagosome; Tuberculosis		0	85.5	174.3	58.3	257.5	94.9	218.8	81.7	62.8	184.8	133.8	220.9	60.2	57.6	15.6	155.9	139.7	98.9	53.2
TRUE	High	Master Protein	O60716	Catenin delta-1 OS=Homo sapiens OX=9606 GN=CTNND1 PE=1 SV=1	0	FALSE	283.328	52	34	494	34	1	968	108.1	6.23	9821	780.24	33	30	cell organization and biogenesis;metabolic process;regulation of biological process;response to stimulus	cytoplasm;cytosol;membrane;nucleus	protein binding	Pf00514	1500	ENSG00000198561.13	CTNND1	11	hsa04520; hsa04670; hsa04015	Adherens junction; Leukocyte transendothelial migration; Rap1 signaling pathway	Wnt Signaling Pathway and Pluripotency; VEGFA-VEGFR2 Signaling Pathway	0	228	182.8	94.2	177.3	129.5	114.1	76	71.2	114.4	137.1	108.9	43.8	95.9	70.9	110.5	83.7	122.3	94.3
TRUE	High	Master Protein	P17655	Calpain-2 catalytic subunit OS=Homo sapiens OX=9606 GN=CAPN2 PE=1 SV=6	0	FALSE	282.03	57	31	915	31	1	700	79.9	4.98	17635	1445.31	31	27	cell organization and biogenesis;metabolic process;regulation of biological process;response to stimulus	chromosome;cytoplasm;cytoskeleton;cytosol;endoplasmic reticulum;Golgi;membrane;nucleus;vacuole	catalytic activity;metal ion binding;protein binding	Pf00648, Pf01067, Pf13833	824	ENSG00000162909.17	CAPN2	1	hsa04141; hsa04210; hsa04510; hsa05010	Protein processing in endoplasmic reticulum; Apoptosis; Focal adhesion; Alzheimer's disease	VEGFA-VEGFR2 Signaling Pathway; Alzheimers Disease; Integrin-mediated Cell Adhesion	0	223	116.5	71.1	190.8	115.6	85	96.2	78.4	316.7	224.5	132.7	36.4	66.7	27.7	209.2	52.3	71.2	44.4
TRUE	High	Master Protein	P00738	Haptoglobin OS=Homo sapiens OX=9606 GN=HP PE=1 SV=1	0	FALSE	281.759	63	27	889	13	1	406	45.2	6.58	18622	1361.55	27	24	defense response;metabolic process;regulation of biological process;response to stimulus;transport	extracellular;organelle lumen	antioxidant activity;catalytic activity;protein binding	Pf00089	3240	ENSG00000257017.8	HP	16				14	73	19.9	38.1	19.5	84.8	21.6	23.3	63.5	31.2	57.1	75.4	306.1	61.7	434.4	42.6	42.9	45.1	266
TRUE	High	Master Protein	P26038	Moesin OS=Homo sapiens OX=9606 GN=MSN PE=1 SV=3	0	FALSE	281.149	70	45	1251	35	1	577	67.8	6.4	25667	1621.17	45	40	cell differentiation;cell organization and biogenesis;cell proliferation;cellular component movement;regulation of biological process;response to stimulus	cell surface;cytoplasm;cytoskeleton;cytosol;membrane;nucleus	protein binding;RNA binding;structural molecule activity	Pf00373, Pf00769, Pf09379, Pf09380	4478	ENSG00000147065.16	MSN	X	hsa05162; hsa05205; hsa04670; hsa04810	Measles; Proteoglycans in cancer; Leukocyte transendothelial migration; Regulation of actin cytoskeleton	AGE/RAGE pathway; Glial Cell Differentiation; Regulation of Actin Cytoskeleton	10	83.7	115.3	81.6	131.7	106.5	127.8	75.5	62.1	173.6	121.3	153.5	97.5	78.3	80.1	109.6	57.9	139	47.2
TRUE	High	Master Protein	P68366	Tubulin alpha-4A chain OS=Homo sapiens OX=9606 GN=TUBA4A PE=1 SV=1	0	FALSE	280.962	60	25	3501	6	1	448	49.9	5.06	87485	5796.08	25	22	cell organization and biogenesis;regulation of biological process;transport	cytoplasm;cytoskeleton;cytosol;extracellular	catalytic activity;nucleotide binding;protein binding;structural molecule activity	Pf00091, Pf03953	7277	ENSG00000127824.13	TUBA4A	2	hsa04145; hsa05130; hsa04210; hsa04540	Phagosome; Pathogenic Escherichia coli infection; Apoptosis; Gap junction	Parkin-Ubiquitin Proteasomal System pathway; Pathogenic Escherichia coli infection	0	200.5	117.2	102.1	262.2	120	255.3	87.5	90.8	103.3	153.4	122.8	23.9	62.4	65.3	61.6	135.6	78.7	46
TRUE	High	Master Protein	Q02218	2-oxoglutarate dehydrogenase, mitochondrial OS=Homo sapiens OX=9606 GN=OGDH PE=1 SV=3	0	FALSE	279.1	59	42	506	33	1	1023	115.9	6.86	8227	780.58	40	35	cellular component movement;metabolic process	cytosol;membrane;mitochondrion;organelle lumen	catalytic activity;metal ion binding;protein binding	Pf00676, Pf02779	4967	ENSG00000105953.14	OGDH	7	hsa00020; hsa00310; hsa01100; hsa01200; hsa00380	Citrate cycle (TCA cycle); Lysine degradation; Metabolic pathways; Carbon metabolism; Tryptophan metabolism	Tryptophan metabolism; Amino Acid metabolism; TCA Cycle; TCA Cycle and Deficiency of Pyruvate Dehydrogenase complex (PDHc)	9	62.5	46.3	26.2	51.3	22.9	60.8	47.1	32.5	24.6	57.8	35.2	28.8	14.2	31.1	85.7	38.1	17.4	9.1
TRUE	High	Master Protein	P22626	Heterogeneous nuclear ribonucleoproteins A2/B1 OS=Homo sapiens OX=9606 GN=HNRNPA2B1 PE=1 SV=2	0	FALSE	279.083	69	28	1390	24	1	353	37.4	8.95	28901	2046.69	28	24	metabolic process;regulation of biological process;response to stimulus;transport	cytoplasm;extracellular;membrane;nucleus;spliceosomal complex	DNA binding;protein binding;RNA binding	Pf00076, Pf13893, Pf14259	3181	ENSG00000122566.20	HNRNPA2B1	7			mRNA Processing	4	173.3	160.7	59.8	204.8	110.7	166.9	66.5	96.1	110.2	186	75.3	65.5	122.9	17.6	155.1	139.2	87.4	55.6
TRUE	High	Master Protein	Q9H4M9	EH domain-containing protein 1 OS=Homo sapiens OX=9606 GN=EHD1 PE=1 SV=2	0	FALSE	278.81	80	40	637	26	1	534	60.6	6.83	12276	849.51	38	34	cell organization and biogenesis;coagulation;regulation of biological process;response to stimulus;transport	endosome;membrane	metal ion binding;nucleotide binding;protein binding	Pf00350, Pf01926, Pf12763	10938	ENSG00000110047.17	EHD1	11	hsa04144	Endocytosis	Insulin Signaling	14	280.3	159.7	133.5	105.2	29.9	126.6	68.9	83.9	120.8	51.1	173.3	43.6	172.2	40.8	195.4	34.1	151.5	34.2
TRUE	High	Master Protein	P04083	Annexin A1 OS=Homo sapiens OX=9606 GN=ANXA1 PE=1 SV=2	0	FALSE	277.303	69	26	2026	26	1	346	38.7	7.02	53957	3483.13	26	25	cell differentiation;cell organization and biogenesis;cellular component movement;defense response;metabolic process;regulation of biological process;response to stimulus;transport	cell surface;cytoplasm;cytoskeleton;cytosol;endosome;extracellular;membrane;nucleus;vacuole	catalytic activity;DNA binding;enzyme regulator activity;metal ion binding;protein binding;RNA binding;structural molecule activity	Pf00191	301	ENSG00000135046.13	ANXA1	9			VEGFA-VEGFR2 Signaling Pathway; Spinal Cord Injury; Prostaglandin Synthesis and Regulation; Integrated Breast Cancer Pathway	0	119.2	179.8	50.3	147.4	119.5	100.7	96.4	116.6	70	152	118.3	374.5	97.7	73.5	126.8	167.3	35.2	57.4
TRUE	High	Master Protein	P13637	Sodium/potassium-transporting ATPase subunit alpha-3 OS=Homo sapiens OX=9606 GN=ATP1A3 PE=1 SV=3	0	FALSE	276.781	43	35	782	18	1	1013	111.7	5.38	21382	1317.1	34	30	cell communication;cellular homeostasis;regulation of biological process;response to stimulus;transport	cytoplasm;endoplasmic reticulum;Golgi;membrane;nucleus	catalytic activity;metal ion binding;nucleotide binding;protein binding;transporter activity	Pf00122, Pf00689, Pf00690, Pf00702, Pf08282, Pf12710, Pf13246	478	ENSG00000105409.16	ATP1A3	19	hsa04971; hsa04918; hsa04974; hsa04024; hsa04960; hsa04911; hsa04022; hsa04970; hsa04964; hsa04973; hsa04961; hsa04972; hsa04976; hsa04978; hsa04261; hsa04260; hsa04919	Gastric acid secretion; Thyroid hormone synthesis; Protein digestion and absorption; cAMP signaling pathway; Aldosterone-regulated sodium reabsorption; Insulin secretion; cGMP-PKG signaling pathway; Salivary secretion; Proximal tubule bicarbonate reclamation; Carbohydrate digestion and absorption; Endocrine and other factor-regulated calcium reabsorption; Pancreatic secretion; Bile secretion; Min…	Sudden Infant Death Syndrome (SIDS) Susceptibility Pathways	0	245.3	35.4	66.7	44.9	46.3	42.5	20.6	53.4	51.3	68.4	51.3	58	45.6	204.6	34.8	226.1	52.3	163.9
TRUE	High	Master Protein	P12110	Collagen alpha-2(VI) chain OS=Homo sapiens OX=9606 GN=COL6A2 PE=1 SV=4	0	FALSE	276.685	31	27	1272	27	1	1019	108.5	6.21	23237	2003.41	26	26	cell organization and biogenesis;metabolic process;response to stimulus	extracellular;membrane;organelle lumen	protein binding	Pf00092, Pf01391, Pf13519	1292	ENSG00000142173.14	COL6A2	21	hsa04974; hsa04151; hsa04510; hsa04512	Protein digestion and absorption; PI3K-Akt signaling pathway; Focal adhesion; ECM-receptor interaction	Focal Adhesion-PI3K-Akt-mTOR-signaling pathway; Focal Adhesion; miRNA targets in ECM and membrane receptors	0	53	32.4	84.2	60.3	35.7	56.1	43.2	27.1	27	34.3	56.1	84.1	223.7	64.1	70	111.3	141.5	101.8
TRUE	High	Master Protein	Q7KZF4	Staphylococcal nuclease domain-containing protein 1 OS=Homo sapiens OX=9606 GN=SND1 PE=1 SV=1	0	FALSE	276.446	54	39	618	39	1	910	101.9	7.17	11542	963.54	39	36	cell differentiation;metabolic process;regulation of biological process	cytoplasm;cytosol;membrane;mitochondrion;nucleus	catalytic activity;protein binding;RNA binding	Pf00565, Pf00567	27044	ENSG00000197157.10	SND1	7	hsa05169; hsa05203	Epstein-Barr virus infection; Viral carcinogenesis		0	135.3	114.9	52.6	119.2	50.5	106.9	42.3	40.3	73.6	78.9	68.6	143.1	78.6	72.4	152.6	241.3	107.4	124.3
TRUE	High	Master Protein	P50993	Sodium/potassium-transporting ATPase subunit alpha-2 OS=Homo sapiens OX=9606 GN=ATP1A2 PE=1 SV=1	0	FALSE	275.771	42	40	947	25	1	1020	112.2	5.66	24380	1499.3	38	38	cell communication;cellular homeostasis;metabolic process;regulation of biological process;response to stimulus;transport	cytoplasm;endosome;membrane	catalytic activity;metal ion binding;nucleotide binding;protein binding;transporter activity	Pf00122, Pf00689, Pf00690, Pf00702, Pf08282, Pf12710, Pf13246	477	ENSG00000018625.14	ATP1A2	1	hsa04022; hsa04971; hsa04972; hsa04911; hsa04978; hsa04974; hsa04970; hsa04976; hsa04960; hsa04261; hsa04964; hsa04024; hsa04260; hsa04973; hsa04918; hsa04919; hsa04961	cGMP-PKG signaling pathway; Gastric acid secretion; Pancreatic secretion; Insulin secretion; Mineral absorption; Protein digestion and absorption; Salivary secretion; Bile secretion; Aldosterone-regulated sodium reabsorption; Adrenergic signaling in cardiomyocytes; Proximal tubule bicarbonate reclamation; cAMP signaling pathway; Cardiac muscle contraction; Carbohydrate digestion and absorption; T…	Synaptic Vesicle Pathway	2	20.5	30.6	25.8	26.5	128.3	13.6	79.6	52.7	27.8	13.2	22.7	30.8	27.3	23.1	45	127.3	165.6	37.3
TRUE	High	Master Protein	P09874	Poly [ADP-ribose] polymerase 1 OS=Homo sapiens OX=9606 GN=PARP1 PE=1 SV=4	0	FALSE	275.545	50	42	486	42	1	1014	113	8.88	7960	780.15	39	37	cell death;cell differentiation;cell organization and biogenesis;metabolic process;regulation of biological process;response to stimulus	membrane;mitochondrion;nucleus	catalytic activity;DNA binding;metal ion binding;nucleotide binding;protein binding;RNA binding	Pf00533, Pf00644, Pf00645, Pf02877, Pf05406, Pf08063	142	ENSG00000143799.12	PARP1	1	hsa04064; hsa03410; hsa04210	NF-kappa B signaling pathway; Base excision repair; Apoptosis	Corticotropin-releasing hormone signaling pathway; NAD+ biosynthetic pathways; NAD metabolism, sirtuins and aging; Fas Ligand (FasL) pathway and Stress induction of Heat Shock Proteins (HSP) regulation; NAD+ metabolism; Nanoparticle triggered regulated necrosis	0	104.4	134.4	87.4	176.4	96.9	101.2	81.1	84.4	119.6	104.4	135.6	77.5	64	29.4	108.7	125.8	108.6	37.5
TRUE	High	Master Protein	P35573	Glycogen debranching enzyme OS=Homo sapiens OX=9606 GN=AGL PE=1 SV=3	0	FALSE	275.506	43	45	295	45	1	1532	174.7	6.76	5631	419.81	43	41	metabolic process;response to stimulus;transport	cytoplasm;cytosol;endoplasmic reticulum;extracellular;nucleus;organelle lumen	catalytic activity;protein binding	Pf06202, Pf14699, Pf14701, Pf14702	178	ENSG00000162688.16	AGL	1	hsa01100; hsa00500	Metabolic pathways; Starch and sucrose metabolism	Glycogen Metabolism	0	43.3	288.2	93.5	382.9	37.1	42.5	29.4	32.2	37.8	22	68.6	198.7	63.1	276	108.9	96.5	134.7	98
TRUE	High	Master Protein	P02042	Hemoglobin subunit delta OS=Homo sapiens OX=9606 GN=HBD PE=1 SV=2	0	FALSE	275.256	95	19	6443	5	1	147	16	8.05	146998	9933.07	19	18	coagulation;transport	cytosol	metal ion binding;protein binding;transporter activity	Pf00042	3045	ENSG00000223609.7	HBD	11				8	23.3	18.4	45.5	6.5	126.5	80.2	71.2	45.6	13.9	43.9	81.8	113.3	74.8	72.5	67.7	68.1	162.6	137.3
TRUE	High	Master Protein	O00159	Unconventional myosin-Ic OS=Homo sapiens OX=9606 GN=MYO1C PE=1 SV=4	0	FALSE	271.608	48	45	714	44	1	1063	121.6	9.41	12305	984.97	45	38	cell organization and biogenesis;regulation of biological process;response to stimulus;transport	cytoplasm;cytosol;membrane;nucleus	catalytic activity;motor activity;nucleotide binding;protein binding	Pf00063, Pf06017	4641	ENSG00000197879.14	MYO1C	17			Insulin Signaling	1	253	196	67.9	111.1	56.3	85.8	126.3	125.9	80.4	111.1	103.1	48.2	85.6	57	119.5	67	115.7	40.7
TRUE	High	Master Protein	A0A140TA41	Tenascin-X OS=Homo sapiens OX=9606 GN=TNXB PE=1 SV=1	0	FALSE	271.395	26	68	246	25	1	4242	458	5.17		788.82		68	cell organization and biogenesis;metabolic process;regulation of biological process;response to stimulus	membrane	catalytic activity;nucleotide binding;protein binding;receptor activity;signal transducer activity	Pf00041, Pf00147, Pf00757, Pf01500, Pf04885, Pf07974		ENSG00000206258.12		CHR_HSCHR6_MHC_MCF_CTG1				0	18.2	22.9	20.9	7.4	7.3	24.1	26.3	19.6	6.4	12.9	27.1	12.1	698.4	22.7	1086.2	28.8	31.7	7.8
TRUE	High	Master Protein	P01011	Alpha-1-antichymotrypsin OS=Homo sapiens OX=9606 GN=SERPINA3 PE=1 SV=2	0	FALSE	269.989	62	32	601	32	1	423	47.6	5.52	12345	903.35	32	27	defense response;regulation of biological process;response to stimulus;transport	extracellular;nucleus;organelle lumen	DNA binding;enzyme regulator activity;protein binding	Pf00079	12	ENSG00000196136.17	SERPINA3	14			Vitamin B12 Metabolism; Selenium Micronutrient Network; Folate Metabolism	0	83.7	9.5	53.2	27.6	50.5	28.5	34.1	57.1	20.9	24.3	41.4	21.1	59.7	650.5	34.5	44	37.1	165
TRUE	High	Master Protein	Q14203	Dynactin subunit 1 OS=Homo sapiens OX=9606 GN=DCTN1 PE=1 SV=3	0	FALSE	269.448	48	43	404	6	1	1278	141.6	5.81	7063	601.39	40	37	cell division;cell organization and biogenesis;cellular component movement;metabolic process;regulation of biological process;transport	chromosome;cytoplasm;cytoskeleton;cytosol;membrane;nucleus	catalytic activity;motor activity;protein binding	Pf00261, Pf01302, Pf04111, Pf05622, Pf05667, Pf06160, Pf08317, Pf12128, Pf12329, Pf12455, Pf13166, Pf13514, Pf15035	1639	ENSG00000204843.12	DCTN1	2	hsa05016; hsa04962	Huntington's disease; Vasopressin-regulated water reabsorption		35	106.7	52.1	39.9	82.2	51.7	58.2	38	47.6	92	65.9	96.2	50.7	35.7	227.4	32.7	60.2	65.1	37.4
TRUE	High	Master Protein	P40939	Trifunctional enzyme subunit alpha, mitochondrial OS=Homo sapiens OX=9606 GN=HADHA PE=1 SV=2	0	FALSE	266.662	57	35	892	35	1	763	82.9	9.04	17569	1523.32	34	33	metabolic process;response to stimulus	membrane;mitochondrion	catalytic activity;nucleotide binding;protein binding	Pf00378, Pf00725, Pf02737	3030	ENSG00000084754.10	HADHA	2	hsa00310; hsa00071; hsa00380; hsa00062; hsa01200; hsa00650; hsa00280; hsa01040; hsa01212; hsa01100; hsa00410; hsa00640	Lysine degradation; Fatty acid degradation; Tryptophan metabolism; Fatty acid elongation; Carbon metabolism; Butanoate metabolism; Valine, leucine and isoleucine degradation; Biosynthesis of unsaturated fatty acids; Fatty acid metabolism; Metabolic pathways; beta-Alanine metabolism; Propanoate metabolism	Sudden Infant Death Syndrome (SIDS) Susceptibility Pathways; Fatty Acid Beta Oxidation; Valproic acid pathway; Mitochondrial LC-Fatty Acid Beta-Oxidation	0	163.7	124.7	46	232.1	71.5	156.6	52.5	64.9	59.4	81.4	109	108.3	127.1	37.4	158.8	158.8	100	38.3
TRUE	High	Master Protein	P49419	Alpha-aminoadipic semialdehyde dehydrogenase OS=Homo sapiens OX=9606 GN=ALDH7A1 PE=1 SV=5	0	FALSE	265.904	69	29	919	29	1	539	58.5	7.99	19060	1397.9	29	27	metabolic process	cytoplasm;cytosol;mitochondrion;nucleus;organelle lumen	catalytic activity;protein binding	Pf00171	501	ENSG00000164904.17	ALDH7A1	5	hsa01100; hsa00620; hsa00053; hsa00280; hsa00010; hsa00340; hsa00071; hsa00380; hsa00310; hsa01230; hsa00300; hsa00561; hsa00410; hsa00330; hsa00260	Metabolic pathways; Pyruvate metabolism; Ascorbate and aldarate metabolism; Valine, leucine and isoleucine degradation; Glycolysis / Gluconeogenesis; Histidine metabolism; Fatty acid degradation; Tryptophan metabolism; Lysine degradation; Biosynthesis of amino acids; Lysine biosynthesis; Glycerolipid metabolism; beta-Alanine metabolism; Arginine and proline metabolism; Glycine, serine and threoni…	Amino Acid metabolism	0	204.3	90.4	66.1	321	61.7	306.6	31.9	37.8	63.6	195.6	37.9	58.7	96.3	23.7	160.9	41.4	72.1	43.1
TRUE	High	Master Protein	P07814	Bifunctional glutamate/proline--tRNA ligase OS=Homo sapiens OX=9606 GN=EPRS PE=1 SV=5	0	FALSE	265.696	44	45	362	45	1	1512	170.5	7.33	6540	583.25	44	37	cell organization and biogenesis;metabolic process;regulation of biological process;response to stimulus	cytoplasm;cytosol;membrane	catalytic activity;metal ion binding;nucleotide binding;protein binding;RNA binding	Pf00458, Pf00587, Pf00749, Pf01406, Pf03129, Pf03950, Pf09180, Pf14497	2058	ENSG00000136628.17	EPRS	1	hsa00860; hsa01100; hsa00970	Porphyrin and chlorophyll metabolism; Metabolic pathways; Aminoacyl-tRNA biosynthesis	Amino Acid metabolism; Parkinsons Disease Pathway	0	116.6	154.1	58.2	198.6	100.3	134.3	113.6	86.7	118.2	184.5	70.2	71.6	44.9	29.1	102.1	128.4	79.1	33.3
TRUE	High	Master Protein	P32119	Peroxiredoxin-2 OS=Homo sapiens OX=9606 GN=PRDX2 PE=1 SV=5	0	FALSE	265.502	88	23	1060	22	1	198	21.9	5.97	22302	1995.99	23	20	cell communication;cellular homeostasis;metabolic process;regulation of biological process;response to stimulus	cytoplasm;cytosol;membrane	antioxidant activity;catalytic activity;protein binding	Pf00578, Pf08534, Pf10417	7001	ENSG00000167815.11	PRDX2	19			Selenium Micronutrient Network	1	39.6	75.7	80.8	52.6	61.4	48.8	58.5	67.6	55.6	39.2	74.1	79.7	42.5	39.2	78.2	81.3	70.4	46.6
TRUE	High	Master Protein	P23634	Plasma membrane calcium-transporting ATPase 4 OS=Homo sapiens OX=9606 GN=ATP2B4 PE=1 SV=2	0	FALSE	264.711	35	34	593	22	1	1241	137.8	6.6	10898	1032.53	34	30	cellular component movement;cellular homeostasis;regulation of biological process;response to stimulus;transport	membrane	catalytic activity;enzyme regulator activity;metal ion binding;nucleotide binding;protein binding;transporter activity	Pf00122, Pf00689, Pf00690, Pf00702, Pf08282, Pf12424, Pf12710, Pf13246	493		ATP2B4	1	hsa04972; hsa04970; hsa04024; hsa04022; hsa04020; hsa04261	Pancreatic secretion; Salivary secretion; cAMP signaling pathway; cGMP-PKG signaling pathway; Calcium signaling pathway; Adrenergic signaling in cardiomyocytes		12	80.7	110.7	45.9	89.5	42.9	74.6	58.6	58.3	77.9	89	78.1	125.6	135.5	149.1	129.4	142.3	77.2	45.8
TRUE	High	Master Protein	P07951	Tropomyosin beta chain OS=Homo sapiens OX=9606 GN=TPM2 PE=1 SV=1	0	FALSE	262.194	68	31	1104	3	1	284	32.8	4.7	20040	1710.24	31	29	cell organization and biogenesis;cellular component movement;regulation of biological process	cytoplasm;cytoskeleton;cytosol	protein binding;structural molecule activity	Pf00261, Pf12718	7169	ENSG00000198467.13	TPM2	9	hsa05414; hsa04260; hsa05410; hsa04261	Dilated cardiomyopathy; Cardiac muscle contraction; Hypertrophic cardiomyopathy (HCM); Adrenergic signaling in cardiomyocytes	Striated Muscle Contraction	9	7.1	21	38.8	39.6	25.7	57	74.6	81.5	46.6	80.2	16.6	37.7	248.4	411.6	11.8	7.4	50.7	53.4
TRUE	High	Master Protein	P14923	Junction plakoglobin OS=Homo sapiens OX=9606 GN=JUP PE=1 SV=3	0	FALSE	260.419	64	33	644	28	1	745	81.7	6.14	13487	1037.99	33	32	cell death;cell organization and biogenesis;cellular component movement;regulation of biological process;response to stimulus;transport	cytoplasm;cytoskeleton;cytosol;extracellular;membrane;nucleus;organelle lumen	protein binding;signal transducer activity;structural molecule activity	Pf00514	3728	ENSG00000173801.16	JUP	17	hsa05202; hsa05412; hsa05200; hsa05221	Transcriptional misregulation in cancer; Arrhythmogenic right ventricular cardiomyopathy (ARVC); Pathways in cancer; Acute myeloid leukemia	Ectoderm Differentiation; Arrhythmogenic Right Ventricular Cardiomyopathy; Corticotropin-releasing hormone signaling pathway	5	100.1	197.1	57.7	164.2	76.2	59.1	267.5	303.3	228.4	292.7	88.3	70.3	34.2	16.7	38.1	39.6	161.7	28.8
TRUE	High	Master Protein	P25705	ATP synthase subunit alpha, mitochondrial OS=Homo sapiens OX=9606 GN=ATP5F1A PE=1 SV=1	0	FALSE	260.036	60	31	2260	31	1	553	59.7	9.13	57060	3882.57	30	29	cell organization and biogenesis;metabolic process;regulation of biological process;transport	membrane;mitochondrion;organelle lumen	catalytic activity;nucleotide binding;protein binding;RNA binding;transporter activity	Pf00006, Pf00306, Pf02663, Pf02874, Pf05943	498	ENSG00000152234.15	ATP5A1	18	hsa00190; hsa05016; hsa05010; hsa01100; hsa05012	Oxidative phosphorylation; Huntington's disease; Alzheimer's disease; Metabolic pathways; Parkinson's disease	Oxidative phosphorylation; Electron Transport Chain	0	120.6	134.8	50.2	155.7	82.2	131.9	63.1	82.8	72.5	117.5	76	47.2	78.9	33.5	92.3	103.4	55	50.4
TRUE	High	Master Protein	G5E9E7	Tight junction protein 1 (Zona occludens 1), isoform CRA_e OS=Homo sapiens OX=9606 GN=TJP1 PE=1 SV=1	0	FALSE	259.983	46	54	339	7	1	1692	189.6	6.71		1237.35		54	cell communication;cell organization and biogenesis;regulation of biological process;response to stimulus	cytoplasm;cytosol;membrane	protein binding	Pf00018, Pf00595, Pf00625, Pf00791, Pf07653, Pf13180	7082	ENSG00000277401.4; ENSG00000104067.16	TJP1	15; CHR_HSCHR15_4_CTG8				0	263.6	188.1	68	174.3	38.8	92	88.7	176.1	157.5	259.7	36.5	32.1	16.3	47.9	92.8	23.8	46.1	27.7
TRUE	High	Master Protein	O75083	WD repeat-containing protein 1 OS=Homo sapiens OX=9606 GN=WDR1 PE=1 SV=4	0	FALSE	259.625	59	25	587	25	1	606	66.2	6.65	12834	1004.97	25	22	cell differentiation;cell organization and biogenesis;cellular component movement;metabolic process;regulation of biological process;transport	cytoplasm;cytoskeleton;cytosol;extracellular	protein binding	Pf00400, Pf04762, Pf08662, Pf14783	9948	ENSG00000071127.16	WDR1	4			Hypertrophy Model	0	115.9	136	84.8	143.8	70.7	129.1	114	87.7	148.8	139.4	113.5	108	93.4	41	42.8	92.9	92.1	52.9
TRUE	High	Master Protein	P51888	Prolargin OS=Homo sapiens OX=9606 GN=PRELP PE=1 SV=1	0	FALSE	257.373	53	26	1306	26	1	382	43.8	9.38	24802	1797.15	25	19	cell organization and biogenesis;metabolic process	extracellular;organelle lumen	protein binding;structural molecule activity	Pf01462, Pf12799, Pf13855	5549	ENSG00000188783.5	PRELP	1				0	77.8	17.5	83.2	12.8	3.7	20.2	7	32.6	8.3	15.4	17.9	27.5	406	368.7	38	9.3	63.9	318.3
TRUE	High	Master Protein	P07237	Protein disulfide-isomerase OS=Homo sapiens OX=9606 GN=P4HB PE=1 SV=3	0	FALSE	256.499	76	37	1318	37	1	508	57.1	4.87	28014	1938.65	37	32	cell organization and biogenesis;cellular homeostasis;metabolic process;regulation of biological process;response to stimulus	endoplasmic reticulum;extracellular;membrane;organelle lumen	catalytic activity;metal ion binding;protein binding;RNA binding	Pf00085, Pf01216, Pf13098, Pf13848, Pf13899, Pf13905	5034	ENSG00000185624.14	P4HB	17	hsa04141	Protein processing in endoplasmic reticulum		0	71.5	91.1	65.4	124.3	67.3	113.1	126.8	169.9	101.9	150.2	124.9	149.7	100.1	23.7	89.6	185	70	66.3
TRUE	High	Master Protein	P50454	Serpin H1 OS=Homo sapiens OX=9606 GN=SERPINH1 PE=1 SV=2	0	FALSE	255.441	63	22	698	22	1	418	46.4	8.69	14296	1250.24	22	20	cell organization and biogenesis;metabolic process;regulation of biological process;response to stimulus	cytoplasm;endoplasmic reticulum;membrane;organelle lumen	enzyme regulator activity;protein binding;RNA binding	Pf00079	871	ENSG00000149257.13	SERPINH1	11			Endochondral Ossification	0	162.1	158.3	102.4	126.1	20.3	116.9	69.4	53.7	130.4	293.2	109.6	50	86.7	37.3	63.4	96.4	93.5	42.5
TRUE	High	Master Protein	P00734	Prothrombin OS=Homo sapiens OX=9606 GN=F2 PE=1 SV=2	0	FALSE	255.17	54	29	501	29	1	622	70	5.9	10267	796.23	28	26	cellular component movement;cellular homeostasis;coagulation;defense response;development;metabolic process;regulation of biological process;response to stimulus;transport	extracellular;membrane;organelle lumen	catalytic activity;metal ion binding;protein binding;receptor activity;signal transducer activity	Pf00051, Pf00089, Pf00594, Pf09342, Pf09396	2147	ENSG00000180210.14	F2	11	hsa04610; hsa04810; hsa04080	Complement and coagulation cascades; Regulation of actin cytoskeleton; Neuroactive ligand-receptor interaction	Vitamin B12 Metabolism; Folate Metabolism; Selenium Micronutrient Network; IL1 and megakaryocytes in obesity; Complement and Coagulation Cascades; Regulation of Actin Cytoskeleton; Blood Clotting Cascade	0	128.1	74.4	228.5	79.7	65	79.5	82.7	95.3	56.1	74.3	154.1	90.5	162.7	151.9	115.3	68.2	117.3	242
TRUE	High	Master Protein	Q14767	Latent-transforming growth factor beta-binding protein 2 OS=Homo sapiens OX=9606 GN=LTBP2 PE=1 SV=3	0	FALSE	254.789	27	33	282	33	1	1821	194.9	5.19	5524	476.11	31	30	cell organization and biogenesis;regulation of biological process;response to stimulus;transport	cell surface;extracellular;membrane	metal ion binding;protein binding	Pf00683, Pf06247, Pf07645, Pf12662	4053	ENSG00000119681.11	LTBP2	14			Hypothesized Pathways in Pathogenesis of Cardiovascular Disease	0	95.1	59.5	16.5	55.2	66.5	661.9	61.1	100.6	65.7	183.7	182.6	35.6	112.9	84.3	44.7	35.9	68.2	13.6
TRUE	High	Master Protein	P12956	X-ray repair cross-complementing protein 6 OS=Homo sapiens OX=9606 GN=XRCC6 PE=1 SV=2	0	FALSE	254.291	49	34	926	33	1	609	69.8	6.64	17613	1367.83	32	30	cell organization and biogenesis;defense response;metabolic process;regulation of biological process;response to stimulus;transport	chromosome;cytoplasm;cytosol;extracellular;membrane;nucleus;organelle lumen	catalytic activity;DNA binding;nucleotide binding;protein binding;RNA binding	Pf02037, Pf02735, Pf03730, Pf03731	2547	ENSG00000196419.12	XRCC6	22	hsa03450	Non-homologous end-joining	Non-homologous end joining	1	110.2	181.2	92.4	154.9	96.5	97.7	91.9	83.5	107.1	134.4	126.2	102.8	81.6	39.9	114.6	189.2	125.7	50.9
TRUE	High	Master Protein	Q6P2Q9	Pre-mRNA-processing-splicing factor 8 OS=Homo sapiens OX=9606 GN=PRPF8 PE=1 SV=2	0	FALSE	253.942	28	50	332	50	1	2335	273.4	8.84	5135	379.6	46	41	cell organization and biogenesis;metabolic process;response to stimulus	membrane;nucleus;spliceosomal complex	catalytic activity;protein binding;RNA binding	Pf01398, Pf08082, Pf08083, Pf08084, Pf10596, Pf10597, Pf10598, Pf12134	10594	ENSG00000174231.16; ENSG00000274442.2	PRPF8	17; CHR_HSCHR17_1_CTG2	hsa03040	Spliceosome	mRNA Processing	0	114.8	291.2	36.8	115.7	182.2	93.8	49.1	64.3	65.5	84.9	61.1	96.6	41.7	122.5	96.6	113.2	94.7	21.7
TRUE	High	Master Protein	P18669	Phosphoglycerate mutase 1 OS=Homo sapiens OX=9606 GN=PGAM1 PE=1 SV=2	0	FALSE	250.206	81	21	1074	21	1	254	28.8	7.18	21239	2002.83	21	21	metabolic process;regulation of biological process;transport	cytoplasm;cytosol;extracellular;membrane;organelle lumen	catalytic activity;protein binding	Pf00300	5223; 643576	ENSG00000171314.8	PGAM1; LOC643576	10; 12	hsa00010; hsa01200; hsa01230; hsa00260; hsa01100; hsa04922; hsa05230	Glycolysis / Gluconeogenesis; Carbon metabolism; Biosynthesis of amino acids; Glycine, serine and threonine metabolism; Metabolic pathways; Glucagon signaling pathway; Central carbon metabolism in cancer	Cori Cycle; Glycolysis and Gluconeogenesis	0	166	191.5	86.1	176.8	183.8	104.5	113.1	64.2	211.8	192.3	85.2	67.8	62	51.1	66.4	97.8	71.4	57.9
TRUE	High	Master Protein	P00915	Carbonic anhydrase 1 OS=Homo sapiens OX=9606 GN=CA1 PE=1 SV=2	0	FALSE	249.977	86	18	995	18	1	261	28.9	7.12	20982	1658.22	18	18	metabolic process;regulation of biological process;response to stimulus;transport	cytoplasm;cytosol	catalytic activity;metal ion binding;protein binding	Pf00194	759	ENSG00000133742.13	CA1	8	hsa00910	Nitrogen metabolism		0	35.3	11.4	101.1	10.1	74.8	30.5	52.9	33.4	12.4	28.3	65.9	151.5	31.5	60.3	64	70.1	209.8	90.5
TRUE	High	Master Protein	P63010	AP-2 complex subunit beta OS=Homo sapiens OX=9606 GN=AP2B1 PE=1 SV=1	0	FALSE	249.782	57	43	618	23	1	937	104.5	5.38	10470	804.97	41	41	cell organization and biogenesis;cellular component movement;metabolic process;regulation of biological process;response to stimulus;transport	cytosol;membrane	protein binding;transporter activity	Pf01602, Pf02883, Pf09066, Pf12717, Pf13646	163	ENSG00000006125.17	AP2B1	17	hsa05016; hsa04721; hsa04961; hsa04144	Huntington's disease; Synaptic vesicle cycle; Endocrine and other factor-regulated calcium reabsorption; Endocytosis	Synaptic Vesicle Pathway; EGF/EGFR Signaling Pathway	19	123.7	106.6	58.4	169.3	75.3	116.7	77.7	61.8	103	164.4	97.4	71.9	59.2	32.1	76.7	143.1	50.4	35.6
TRUE	High	Master Protein	P27797	Calreticulin OS=Homo sapiens OX=9606 GN=CALR PE=1 SV=1	0	FALSE	246.849	68	23	1188	23	1	417	48.1	4.44	23355	2023.32	23	18	cell differentiation;cell organization and biogenesis;cellular homeostasis;metabolic process;regulation of biological process;response to stimulus;transport	cell surface;cytoplasm;cytosol;endoplasmic reticulum;extracellular;Golgi;membrane;nucleus;organelle lumen	DNA binding;metal ion binding;protein binding;RNA binding	Pf00262	811	ENSG00000179218.13	CALR	19	hsa04145; hsa05142; hsa05166; hsa04612; hsa04141	Phagosome; Chagas disease (American trypanosomiasis); HTLV-I infection; Antigen processing and presentation; Protein processing in endoplasmic reticulum	Photodynamic therapy-induced unfolded protein response; Androgen receptor signaling pathway; Calcium Regulation in the Cardiac Cell	0	141.4	128.4	80.5	237.3	102.1	246.1	99.8	75.8	174.1	204.7	120.2	145.4	70.4	56.3	76.8	209.9	84	36.9
TRUE	High	Master Protein	Q12906	Interleukin enhancer-binding factor 3 OS=Homo sapiens OX=9606 GN=ILF3 PE=1 SV=3	0	FALSE	246.738	50	33	579	27	1	894	95.3	8.76	10473	867.26	31	31	defense response;metabolic process;regulation of biological process;response to stimulus	cytoplasm;extracellular;membrane;mitochondrion;nucleus	DNA binding;protein binding;RNA binding	Pf00035, Pf07528, Pf14709	3609	ENSG00000129351.17	ILF3	19				5	127.6	128.6	32	140.4	80.5	109.1	57.4	53.2	81.8	93	37.7	72	75.8	135.1	85.3	102.8	51.1	104.6
TRUE	High	Master Protein	Q9NYU2	UDP-glucose:glycoprotein glucosyltransferase 1 OS=Homo sapiens OX=9606 GN=UGGT1 PE=1 SV=3	0	FALSE	245.461	41	43	417	43	1	1555	177.1	5.63	6180	530.14	41	36	metabolic process;regulation of biological process;response to stimulus	endoplasmic reticulum;organelle lumen	catalytic activity;protein binding	Pf06427	56886	ENSG00000136731.12	UGGT1	2	hsa04141	Protein processing in endoplasmic reticulum		0	180	133.9	60.7	169	71.6	195	86.9	103.1	78.3	219.5	84	100.8	66.4	24.3	72	178.3	65.8	56.6
TRUE	High	Master Protein	P00367	Glutamate dehydrogenase 1, mitochondrial OS=Homo sapiens OX=9606 GN=GLUD1 PE=1 SV=2	0	FALSE	245.396	58	29	723	29	1	558	61.4	7.8	12873	981.83	29	26	cell organization and biogenesis;metabolic process;regulation of biological process	cytoplasm;mitochondrion;organelle lumen	catalytic activity;nucleotide binding;protein binding	Pf00208, Pf02812	2746	ENSG00000148672.8	GLUD1	10	hsa00910; hsa01200; hsa01100; hsa04964; hsa00471; hsa00250; hsa00220	Nitrogen metabolism; Carbon metabolism; Metabolic pathways; Proximal tubule bicarbonate reclamation; D-Glutamine and D-glutamate metabolism; Alanine, aspartate and glutamate metabolism; Arginine biosynthesis	Urea cycle and metabolism of amino groups; Amino Acid metabolism	0	116.9	92.5	44.7	208.2	62	119.1	74.3	116.7	45	116.7	30.8	57.3	97.4	50.5	73.2	108.1	95.7	40.9
TRUE	High	Master Protein	Q92499	ATP-dependent RNA helicase DDX1 OS=Homo sapiens OX=9606 GN=DDX1 PE=1 SV=2	0	FALSE	245.127	56	35	541	35	1	740	82.4	7.23	8630	898.18	35	28	cell organization and biogenesis;development;metabolic process;regulation of biological process;response to stimulus	cytoplasm;cytosol;membrane;nucleus	catalytic activity;DNA binding;nucleotide binding;protein binding;RNA binding	Pf00270, Pf00271, Pf00622	1653	ENSG00000079785.14	DDX1	2			DDX1 as a regulatory component of the Drosha microprocessor; mRNA Processing	0	115.9	108.4	55.5	134.2	69.8	98.3	35.6	56	80.7	55.9	58.2	318.1	77.4	28.4	131.7	209.8	51.8	67.1
TRUE	High	Master Protein	P02730	Band 3 anion transport protein OS=Homo sapiens OX=9606 GN=SLC4A1 PE=1 SV=3	0	FALSE	244.797	50	32	660	32	1	911	101.7	5.19	15999	1101.43	31	28	cellular homeostasis;transport	cytoskeleton;membrane	protein binding;transporter activity	Pf00955, Pf07565	6521	ENSG00000004939.13	SLC4A1	17	hsa04966	Collecting duct acid secretion		0	86.5	39.8	137	41.8	104.4	110.4	63.9	112.7	32.9	74.7	152.7	61.9	19.4	66	105	68.8	180.6	56.5
TRUE	High	Master Protein	Q9Y3Z3	Deoxynucleoside triphosphate triphosphohydrolase SAMHD1 OS=Homo sapiens OX=9606 GN=SAMHD1 PE=1 SV=2	0	FALSE	242.728	65	38	523	38	1	626	72.2	7.14	8701	727.68	37	37	cell organization and biogenesis;defense response;metabolic process;regulation of biological process;response to stimulus	membrane;nucleus	catalytic activity;metal ion binding;nucleotide binding;protein binding;RNA binding	Pf00536, Pf01966, Pf07647	25939	ENSG00000101347.8	SAMHD1	20				0	116.3	104.9	104.8	299.9	63.9	147.9	36.3	37.1	77.5	172.1	52.7	97.7	122.2	67.6	48.5	101.5	97.4	40
TRUE	High	Master Protein	P13797	Plastin-3 OS=Homo sapiens OX=9606 GN=PLS3 PE=1 SV=4	0	FALSE	242.606	58	31	397	24	1	630	70.8	5.6	7929	570.41	31	28	cell organization and biogenesis	cytoplasm;cytosol;membrane	metal ion binding;protein binding	Pf00036, Pf00307, Pf13499	5358	ENSG00000102024.17	PLS3	X				2	43	26.6	26.6	35.9	38.6	34.2	35.4	26.8	34.6	39	40.5	46.9	53.8	52	27	1996	56.7	49.5
TRUE	High	Master Protein	P31150	Rab GDP dissociation inhibitor alpha OS=Homo sapiens OX=9606 GN=GDI1 PE=1 SV=2	0	FALSE	242.496	70	29	1069	18	1	447	50.6	5.14	25234	2021.77	28	28	metabolic process;regulation of biological process;response to stimulus;transport	cytoplasm;cytosol;Golgi	catalytic activity;enzyme regulator activity;protein binding	Pf00996	2664	ENSG00000203879.11	GDI1	X			Integrated Breast Cancer Pathway	0	144	132.3	65.5	118.1	145.5	113.9	84.1	77.6	75.2	104.4	75.8	59.2	59	36.4	66.6	132	68.5	69.3
TRUE	High	Master Protein	Q14974	Importin subunit beta-1 OS=Homo sapiens OX=9606 GN=KPNB1 PE=1 SV=2	0	FALSE	242.332	51	32	616	32	1	876	97.1	4.78	11932	935.39	32	28	cell organization and biogenesis;cellular component movement;metabolic process;regulation of biological process;response to stimulus;transport	cytoplasm;cytosol;extracellular;membrane;nucleus;organelle lumen	metal ion binding;protein binding;RNA binding;transporter activity	Pf02985, Pf03810, Pf13513, Pf13646	3837	ENSG00000108424.9	KPNB1	17	hsa03013	RNA transport	Sterol Regulatory Element-Binding Proteins (SREBP) signalling	0	146.4	117.2	202.3	133.2	544.3	80	521.5	50.2	75.5	86.1	68.5	68.9	41.2	32	68.9	70	32.2	31.2
TRUE	High	Master Protein	P60174	Triosephosphate isomerase OS=Homo sapiens OX=9606 GN=TPI1 PE=1 SV=3	0	FALSE	242.097	77	23	1901	23	1	286	30.8	5.92	45049	3458.73	23	20	development;metabolic process	cytosol;nucleus	catalytic activity;protein binding	Pf00121	7167	ENSG00000111669.14	TPI1	12	hsa01230; hsa01200; hsa00051; hsa01100; hsa00010; hsa00562	Biosynthesis of amino acids; Carbon metabolism; Fructose and mannose metabolism; Metabolic pathways; Glycolysis / Gluconeogenesis; Inositol phosphate metabolism	Cori Cycle; Fatty Acid Beta Oxidation; Glycolysis and Gluconeogenesis	0	122.4	162.4	68.4	148.7	122.1	102.8	166.1	157.5	123	134.8	96.4	120.5	61.9	45.6	124.1	108	83.5	55.2
TRUE	High	Master Protein	P00751	Complement factor B OS=Homo sapiens OX=9606 GN=CFB PE=1 SV=2	0	FALSE	242.032	42	32	454	32	1	764	85.5	7.06	9063	731.48	30	28	defense response;metabolic process;regulation of biological process;response to stimulus	extracellular;membrane	catalytic activity;protein binding	Pf00084, Pf00089, Pf00092, Pf13519	629	ENSG00000243649.8; ENSG00000242335.8; ENSG00000243570.9; ENSG00000239754.9; ENSG00000241534.9	CFB	6; CHR_HSCHR6_MHC_SSTO_CTG1; CHR_HSCHR6_MHC_MCF_CTG1; CHR_HSCHR6_MHC_COX_CTG1; CHR_HSCHR6_MHC_DBB_CTG1	hsa04610; hsa05150	Complement and coagulation cascades; Staphylococcus aureus infection	Complement Activation; Complement and Coagulation Cascades	0	28.8	45.7	122.7	92.2	89.1	107.5	92.4	89.3	99.1	43.2	103.2	90.6	127.4	383	52.6	78.3	58.3	225.5
TRUE	High	Master Protein	P00338	L-lactate dehydrogenase A chain OS=Homo sapiens OX=9606 GN=LDHA PE=1 SV=2	0	FALSE	241.972	81	25	1181	17	1	332	36.7	8.27	23266	1909	23	23	metabolic process;regulation of biological process;response to stimulus	cytoplasm;cytosol;membrane;nucleus	catalytic activity;nucleotide binding;protein binding	Pf00056, Pf02866	3939	ENSG00000134333.13	LDHA	11	hsa00640; hsa00270; hsa04922; hsa04066; hsa01100; hsa00620; hsa00010; hsa05230	Propanoate metabolism; Cysteine and methionine metabolism; Glucagon signaling pathway; HIF-1 signaling pathway; Metabolic pathways; Pyruvate metabolism; Glycolysis / Gluconeogenesis; Central carbon metabolism in cancer	Photodynamic therapy-induced HIF-1 survival signaling; Amino Acid metabolism; Glycolysis and Gluconeogenesis; Cori Cycle	8	147	59.5	38.6	105.6	54.6	52.7	174.8	151.8	108.8	115.2	162.5	81.3	77.4	49.1	194.4	74.5	124.9	42.2
TRUE	High	Master Protein	Q92597	Protein NDRG1 OS=Homo sapiens OX=9606 GN=NDRG1 PE=1 SV=1	0	FALSE	241.485	72	16	590	16	1	394	42.8	5.82	12840	1309.59	16	16	cell organization and biogenesis;regulation of biological process;response to stimulus	cytoplasm;cytoskeleton;cytosol;membrane;nucleus	protein binding	Pf00561, Pf03096, Pf12697	10397	ENSG00000104419.14	NDRG1	8			VEGFA-VEGFR2 Signaling Pathway	0	358.9	171.3	70.8	114	91	287.4	143.4	147.8	75.8	135.9	84.7	12.2	58	191.4	87.8	18.1	208.4	49.6
TRUE	High	Master Protein	Q15075	Early endosome antigen 1 OS=Homo sapiens OX=9606 GN=EEA1 PE=1 SV=2	0	FALSE	241.17	38	45	314	45	1	1411	162.4	5.68	5909	549.98	40	41	cell organization and biogenesis;metabolic process;transport	cytoplasm;cytosol;endosome;membrane	catalytic activity;metal ion binding;motor activity;protein binding;transporter activity	Pf01363, Pf01496, Pf01576, Pf04156, Pf05478, Pf09726, Pf10498, Pf12128, Pf13166	8411	ENSG00000102189.16	EEA1	12	hsa04144; hsa05152; hsa04145	Endocytosis; Tuberculosis; Phagosome	VEGFA-VEGFR2 Signaling Pathway	0	119	83.1	27.6	222.9	128.4	213.6	110.6	103.6	113.1	185.2	82.9	79.7	49.1	42.3	125.9	89.1	70.3	30.9
TRUE	High	Master Protein	Q8WUM4	Programmed cell death 6-interacting protein OS=Homo sapiens OX=9606 GN=PDCD6IP PE=1 SV=1	0	FALSE	240.212	54	40	799	40	1	868	96	6.52	15417	1086.05	39	34	cell death;cell division;cell organization and biogenesis;regulation of biological process;transport	cytoplasm;cytoskeleton;cytosol;extracellular;membrane	protein binding	Pf03097, Pf08391, Pf13949	10015	ENSG00000170248.13	PDCD6IP	3	hsa04144	Endocytosis		0	82.7	106	64.1	163.5	101.1	96	97.2	98.9	161.8	93.8	120.7	118.4	97.1	61.4	119.2	124.4	108.8	50.9
TRUE	High	Master Protein	P07585	Decorin OS=Homo sapiens OX=9606 GN=DCN PE=1 SV=1	0	FALSE	240.134	53	20	825	7	1	359	39.7	8.54	19629	1407.86	20	19	cell organization and biogenesis;metabolic process;regulation of biological process;response to stimulus	cytoplasm;extracellular;organelle lumen	enzyme regulator activity;protein binding;RNA binding	Pf01462, Pf12799, Pf13855	1634	ENSG00000011465.16	DCN	12	hsa04350; hsa05205	TGF-beta signaling pathway; Proteoglycans in cancer	BMP2-WNT4-FOXO1 Pathway in Human Primary Endometrial Stromal Cell Differentiation	11	127	21.6	38.4	10.1	4.1	7.6	22.7	47.1	14.7	38.3	14	98.7	639.9	173.1	27.2	7.5	22.4	283.1
TRUE	High	Master Protein	Q92896	Golgi apparatus protein 1 OS=Homo sapiens OX=9606 GN=GLG1 PE=1 SV=2	0	FALSE	239.284	38	33	469	33	1	1179	134.5	6.9	9711	817.78	33	31	cellular component movement;regulation of biological process	Golgi;membrane	protein binding	Pf00839	2734	ENSG00000090863.11	GLG1	16	hsa04514	Cell adhesion molecules (CAMs)		0	135.5	187.4	70.4	151.8	115.9	187	143.6	105.7	100.3	227.9	114.6	116.2	37.9	13.5	90.3	111.2	93.1	23
TRUE	High	Master Protein	P02790	Hemopexin OS=Homo sapiens OX=9606 GN=HPX PE=1 SV=2	0	FALSE	239.159	70	30	860	29	1	462	51.6	7.02	13647	1387.3	29	26	cellular homeostasis;metabolic process;regulation of biological process;transport	extracellular;organelle lumen	metal ion binding;protein binding;transporter activity	Pf00045	3263	ENSG00000110169.10	HPX	11				1	58.2	32.4	74.6	57.7	73.8	72.7	136	134.2	37.9	63.3	114.8	104.5	194.6	347.8	80.6	130.4	56.6	323.2
TRUE	High	Master Protein	P07942	Laminin subunit beta-1 OS=Homo sapiens OX=9606 GN=LAMB1 PE=1 SV=2	0	FALSE	237.796	32	39	327	39	1	1786	197.9	4.94	5889	462.89	37	33	cell differentiation;cell organization and biogenesis;cellular component movement;metabolic process;regulation of biological process;response to stimulus;transport	extracellular;membrane;organelle lumen	catalytic activity;motor activity;nucleotide binding;protein binding;signal transducer activity;structural molecule activity	Pf00015, Pf00053, Pf00055, Pf01576, Pf02841, Pf03938, Pf04156, Pf05103, Pf05335, Pf05667, Pf05698, Pf05701, Pf06428, Pf07111, Pf07767, Pf08317, Pf08647, Pf09731, Pf10174, Pf13476, Pf13514, Pf13851, Pf15346, Pf15619	3912	ENSG00000091136.13	LAMB1	7	hsa04151; hsa05200; hsa05222; hsa05145; hsa05146; hsa04512; hsa04510	PI3K-Akt signaling pathway; Pathways in cancer; Small cell lung cancer; Toxoplasmosis; Amoebiasis; ECM-receptor interaction; Focal adhesion	Inflammatory Response Pathway; Alpha 6 Beta 4 signaling pathway; Focal Adhesion-PI3K-Akt-mTOR-signaling pathway; Focal Adhesion	0	166.7	133.9	142.8	118.4	45.2	100.9	92.3	92.8	44.7	39.9	81.8	201.9	110.2	27.8	102.9	80.2	117.5	28.9
TRUE	High	Master Protein	P13489	Ribonuclease inhibitor OS=Homo sapiens OX=9606 GN=RNH1 PE=1 SV=2	0	FALSE	237.56	80	24	1138	24	1	461	49.9	4.82	30263	2068.46	24	22	metabolic process;regulation of biological process	cytoplasm;cytosol	enzyme regulator activity;protein binding		6050	ENSG00000276230.4; ENSG00000023191.16	RNH1	11; CHR_HSCHR11_1_CTG8				0	150.3	197.3	97.1	158.3	137.1	60.7	101.6	50.2	130.9	186.4	115.9	67.1	88.4	50.7	87	151.8	251.4	59.6
TRUE	High	Master Protein	Q96HN2	Adenosylhomocysteinase 3 OS=Homo sapiens OX=9606 GN=AHCYL2 PE=1 SV=1	0	FALSE	236.185	56	30	663	15	1	611	66.7	7.36	12619	979.55	28	29	metabolic process;transport	cytoplasm;cytosol;endoplasmic reticulum	catalytic activity;nucleotide binding;protein binding	Pf00670, Pf01262, Pf02254, Pf02826, Pf05221	23382	ENSG00000158467.16	AHCYL2	7	hsa01100; hsa00270	Metabolic pathways; Cysteine and methionine metabolism	One Carbon Metabolism; Trans-sulfuration and one carbon metabolism	14	130.2	177.6	53.1	133.1	122.9	63.6	62.8	81.6	381.5	76.2	90.4	103.5	76.4	25.6	169.2	78.9	75.4	57
TRUE	High	Master Protein	P35222	Catenin beta-1 OS=Homo sapiens OX=9606 GN=CTNNB1 PE=1 SV=1	0	FALSE	234.436	49	25	519	20	1	781	85.4	5.86	10274	830.08	25	22	cell communication;cell differentiation;cell growth;cell organization and biogenesis;cell proliferation;cellular component movement;metabolic process;regulation of biological process;response to stimulus;transport	cytoplasm;cytoskeleton;cytosol;membrane;nucleus	DNA binding;protein binding;signal transducer activity	Pf00514	1499	ENSG00000168036.16	CTNNB1	3	hsa04530; hsa05166; hsa05200; hsa05216; hsa05213; hsa04520; hsa05130; hsa04310; hsa04919; hsa04550; hsa05210; hsa05100; hsa04015; hsa05205; hsa04916; hsa05215; hsa05224; hsa04390; hsa05412; hsa05217; hsa04670; hsa04510	Tight junction; HTLV-I infection; Pathways in cancer; Thyroid cancer; Endometrial cancer; Adherens junction; Pathogenic Escherichia coli infection; Wnt signaling pathway; Thyroid hormone signaling pathway; Signaling pathways regulating pluripotency of stem cells; Colorectal cancer; Bacterial invasion of epithelial cells; Rap1 signaling pathway; Proteoglycans in cancer; Melanogenesis; Prostate can…	Role of Osx and miRNAs in tooth development; Pathogenic Escherichia coli infection; Wnt Signaling in Kidney Disease; TNF related weak inducer of apoptosis (TWEAK) Signaling Pathway; Association Between Physico-Chemical Features and Toxicity Associated Pathways; MicroRNAs in cardiomyocyte hypertrophy; Rac1/Pak1/p38/MMP-2 pathway; TGF-beta Receptor Signaling; Endoderm Differentiation; Wnt Signaling…	0	198.7	202.1	79.5	149.1	116.2	82.7	74.7	88.1	147.6	127.7	100.2	43.2	53.8	27.4	75.7	45.5	39.7	40.4
TRUE	High	Master Protein	P27816	Microtubule-associated protein 4 OS=Homo sapiens OX=9606 GN=MAP4 PE=1 SV=3	0	FALSE	232.66	44	37	420	30	1	1152	120.9	5.43	6697	651.68	37	36	cell division;cell organization and biogenesis;cellular component movement;regulation of biological process	cytoplasm;cytoskeleton	protein binding;RNA binding;structural molecule activity	Pf00418	4134	ENSG00000047849.21	MAP4	3				7	100.2	302.3	355.2	90	128	87.2	193.2	59	168.2	108.8	297.8	11.5	46.8	67.3	44.3	40.4	125	68.7
TRUE	High	Master Protein	Q9Y6C2	EMILIN-1 OS=Homo sapiens OX=9606 GN=EMILIN1 PE=1 SV=3	0	FALSE	232.078	41	30	544	30	1	1016	106.6	5.17	12952	901.5	30	27	cell organization and biogenesis;cellular component movement	extracellular	protein binding;structural molecule activity	Pf00386, Pf07546	11117	ENSG00000138080.13	EMILIN1	2				0	179.6	64.4	88.5	96.3	81.7	286.9	63.7	59.5	60.7	100.7	82.3	45.1	82.3	50.2	51.3	85.3	57.3	46.5
TRUE	High	Master Protein	P46939	Utrophin OS=Homo sapiens OX=9606 GN=UTRN PE=1 SV=2	0	FALSE	230.886	19	51	245	50	1	3433	394.2	5.33	3941	329.44	43	40	cell organization and biogenesis;regulation of biological process;response to stimulus	cytoplasm;cytoskeleton;membrane	metal ion binding;protein binding	Pf00307, Pf00397, Pf00435, Pf00569, Pf09068, Pf09069, Pf11971	7402	ENSG00000152818.18	UTRN	6			Primary Focal Segmental Glomerulosclerosis FSGS	1	149.4	191.7	85.6	192.1	57.8	160.3	84.4	63.7	89.2	139.2	129.4	234.3	79.7	21	83	66.8	76	73.2
TRUE	High	Master Protein	Q00341	Vigilin OS=Homo sapiens OX=9606 GN=HDLBP PE=1 SV=2	0	FALSE	229.247	33	33	404	3	1	1268	141.4	6.87	7852	592.86	32	30	metabolic process;transport	cytoplasm;cytosol;membrane;nucleus	protein binding;RNA binding	Pf00013, Pf13014, Pf14611	3069		HDLBP	2				30	148.8	105.1	68.2	131.5	66	114.6	76.9	69	83.5	161.4	92.3	37.8	69.8	39.9	104.4	145.5	90.3	33.1
TRUE	High	Master Protein	Q9Y4L1	Hypoxia up-regulated protein 1 OS=Homo sapiens OX=9606 GN=HYOU1 PE=1 SV=1	0	FALSE	229.116	47	37	449	37	1	999	111.3	5.22	8748	658.3	35	34	regulation of biological process;response to stimulus;transport	endoplasmic reticulum;extracellular;membrane;organelle lumen	nucleotide binding;protein binding	Pf00012	10525	ENSG00000280682.2; ENSG00000149428.18	HYOU1	11; CHR_HG2217_PATCH	hsa04141	Protein processing in endoplasmic reticulum		0	195.2	106.1	76.4	131.4	87.2	111.5	74.5	80.4	102.2	154.5	98.8	59.1	49	75	82.3	104	57	23.7
TRUE	High	Master Protein	Q03252	Lamin-B2 OS=Homo sapiens OX=9606 GN=LMNB2 PE=1 SV=4	0	FALSE	229.023	52	40	820	36	1	620	69.9	5.59	15119	1123.94	38	39		membrane;nucleus	catalytic activity;motor activity;protein binding;structural molecule activity	Pf00038, Pf00932, Pf01576, Pf12128	84823	ENSG00000176619.12	LMNB2	19	hsa04210	Apoptosis	Gastric cancer network 2; Fas Ligand (FasL) pathway and Stress induction of Heat Shock Proteins (HSP) regulation	3	119.7	113.2	53.8	119.2	125.9	72.4	74.1	48.4	90.1	99.4	71.2	152.8	141.3	55.7	140.5	117.2	59.2	101.2
TRUE	High	Master Protein	P09651	Heterogeneous nuclear ribonucleoprotein A1 OS=Homo sapiens OX=9606 GN=HNRNPA1 PE=1 SV=5	0	FALSE	228.333	50	21	860	17	1	372	38.7	9.13	17671	1423.34	21	19	cell communication;metabolic process;regulation of biological process;response to stimulus;transport	cytoplasm;membrane;nucleus;spliceosomal complex	DNA binding;protein binding;RNA binding	Pf00076, Pf13893, Pf14259	3178	ENSG00000135486.17	HNRNPA1	12	hsa03040	Spliceosome	mRNA Processing	0	137	132.5	67.1	305.8	125.6	158.5	77	101.1	125.2	339.8	42.1	48	102.9	23.9	116.2	144.6	80.4	63
TRUE	High	Master Protein	P02788	Lactotransferrin OS=Homo sapiens OX=9606 GN=LTF PE=1 SV=6	0	FALSE	228.134	59	35	230	35	1	710	78.1	8.12	4500	328.64	34	31	cellular homeostasis;defense response;metabolic process;regulation of biological process;response to stimulus;transport	cell surface;cytoplasm;extracellular;nucleus;organelle lumen	catalytic activity;DNA binding;enzyme regulator activity;metal ion binding;protein binding	Pf00405	4057	ENSG00000012223.12	LTF	3				0	29.2	14.2	14.6	13	56.4	38.2	16.9	33.6	18.3	18.7	13.8	1721.2	53.9	24.2	41.8	62.4	21.2	97
TRUE	High	Master Protein	P02452	Collagen alpha-1(I) chain OS=Homo sapiens OX=9606 GN=COL1A1 PE=1 SV=5	0	FALSE	227.415	35	33	572	32	1	1464	138.9	5.8	9859	920.9	30	26	cell communication;cell differentiation;cell organization and biogenesis;cellular component movement;coagulation;metabolic process;regulation of biological process;response to stimulus;transport	cytoplasm;endoplasmic reticulum;extracellular;Golgi;organelle lumen	metal ion binding;protein binding;structural molecule activity	Pf00093, Pf01391, Pf01410	1277		COL1A1	17	hsa04151; hsa04974; hsa04611; hsa04933; hsa04510; hsa04512; hsa05146	PI3K-Akt signaling pathway; Protein digestion and absorption; Platelet activation; AGE-RAGE signaling pathway in diabetic complications; Focal adhesion; ECM-receptor interaction; Amoebiasis	miR-509-3p alteration of YAP1/ECM axis; Senescence and Autophagy in Cancer; Osteoblast Signaling; Focal Adhesion-PI3K-Akt-mTOR-signaling pathway; Inflammatory Response Pathway; Focal Adhesion	1	186.9	68.1	232	23.5	8.1	25.6	17.5	25.4	22.2	105.4	16	136.2	270.3	101.2	63.7	26.3	45.7	121
TRUE	High	Master Protein	P49411	Elongation factor Tu, mitochondrial OS=Homo sapiens OX=9606 GN=TUFM PE=1 SV=2	0	FALSE	224.28	59	26	669	26	1	452	49.5	7.61	13414	1157.63	24	23	metabolic process;response to stimulus	membrane;mitochondrion	catalytic activity;nucleotide binding;protein binding;RNA binding	Pf00009, Pf03143, Pf03144	7284		TUFM	16				0	135.9	131.3	105.7	202.8	110.4	168.6	101.5	154.8	93.3	128.3	57.5	60.1	57.9	24.8	95.2	98.8	54.2	50.6
TRUE	High	Master Protein	P08758	Annexin A5 OS=Homo sapiens OX=9606 GN=ANXA5 PE=1 SV=2	0	FALSE	224.013	84	32	2274	30	1	320	35.9	5.05	62092	3235.36	31	31	coagulation;regulation of biological process;response to stimulus;transport	cytoplasm;cytosol;extracellular;membrane	enzyme regulator activity;metal ion binding;protein binding	Pf00191	308	ENSG00000164111.14	ANXA5	4			Apoptosis-related network due to altered Notch3 in ovarian cancer; Simplified Interaction Map Between LOXL4 and Oxidative Stress Pathway; Prostaglandin Synthesis and Regulation	2	72.3	95.2	49.4	110.4	148.1	73.7	79	84.2	84.7	79.4	66.7	56	89.2	78.9	78	60.4	110.9	76.2
TRUE	High	Master Protein	P36871	Phosphoglucomutase-1 OS=Homo sapiens OX=9606 GN=PGM1 PE=1 SV=3	0	FALSE	222.568	75	31	643	31	1	562	61.4	6.76	13066	882.18	31	26	metabolic process;transport	cytoplasm;cytoskeleton;cytosol;extracellular	catalytic activity;metal ion binding;protein binding	Pf00408, Pf02878, Pf02879, Pf02880	5236	ENSG00000079739.15	PGM1	1	hsa00520; hsa00052; hsa00030; hsa01100; hsa00010; hsa00500; hsa00230	Amino sugar and nucleotide sugar metabolism; Galactose metabolism; Pentose phosphate pathway; Metabolic pathways; Glycolysis / Gluconeogenesis; Starch and sucrose metabolism; Purine metabolism	Glycogen Metabolism; Glucuronidation; Ectoderm Differentiation	0	58.1	95.6	143.3	107	47.8	81.1	79.2	37.5	207.7	161.6	121.3	93.5	150.5	78.2	157.6	195.4	146.4	98.4
TRUE	High	Master Protein	P06753	Tropomyosin alpha-3 chain OS=Homo sapiens OX=9606 GN=TPM3 PE=1 SV=2	0	FALSE	222.098	63	25	823	3	1	285	32.9	4.72	14199	1314.57	25	24	cell organization and biogenesis;cellular component movement	cytoplasm;cytoskeleton;cytosol	protein binding;structural molecule activity	Pf00261, Pf12718	7170	ENSG00000143549.19	TPM3	1	hsa05410; hsa05200; hsa05216; hsa04260; hsa04261; hsa05414	Hypertrophic cardiomyopathy (HCM); Pathways in cancer; Thyroid cancer; Cardiac muscle contraction; Adrenergic signaling in cardiomyocytes; Dilated cardiomyopathy	Striated Muscle Contraction	6	162.3	106.1	12.7	229.2	138.2	73.8	120.1	41.1	225.7	251	37.7	97.2	79	26.2	92.9	84	107.5	75.3
TRUE	High	Master Protein	P51659	Peroxisomal multifunctional enzyme type 2 OS=Homo sapiens OX=9606 GN=HSD17B4 PE=1 SV=3	0	FALSE	221.222	58	29	508	29	1	736	79.6	8.84	10944	735.34	27	29	cell differentiation;metabolic process	membrane;mitochondrion;organelle lumen	catalytic activity;protein binding	Pf00106, Pf01575, Pf02036, Pf08659, Pf13452, Pf13561, Pf14864	3295	ENSG00000133835.14	HSD17B4	5	hsa04146; hsa00120; hsa01100	Peroxisome; Primary bile acid biosynthesis; Metabolic pathways	Steroid Biosynthesis	0	82	109.6	76	153	124.7	325.2	94.8	82.1	111.2	164.4	141.2	126.7	59.7	108	77.7	39.6	58.6	74.2
TRUE	High	Master Protein	Q9NZN4	EH domain-containing protein 2 OS=Homo sapiens OX=9606 GN=EHD2 PE=1 SV=2	0	FALSE	220.851	64	29	536	27	1	543	61.1	6.46	11102	719.35	28	28	cell organization and biogenesis;coagulation;regulation of biological process;transport	cytoplasm;cytoskeleton;cytosol;endosome;membrane;nucleus	catalytic activity;metal ion binding;nucleotide binding;protein binding	Pf00350, Pf01926, Pf12763	30846	ENSG00000024422.11	EHD2	19	hsa04144	Endocytosis	Insulin Signaling	1	212.4	203.5	101.3	64.7	44	72.7	144.1	190.9	80.4	52.2	55.6	48.2	140	49.8	107.7	64.1	154.9	34.1
TRUE	High	Master Protein	P04844	Dolichyl-diphosphooligosaccharide--protein glycosyltransferase subunit 2 OS=Homo sapiens OX=9606 GN=RPN2 PE=1 SV=3	0	FALSE	220.426	53	23	592	23	1	631	69.2	5.69	13433	1090.32	23	21	metabolic process;response to stimulus	endoplasmic reticulum;membrane	catalytic activity;protein binding	Pf05817	6185	ENSG00000118705.16	RPN2	20	hsa01100; hsa00510; hsa04141	Metabolic pathways; N-Glycan biosynthesis; Protein processing in endoplasmic reticulum	Proteasome Degradation	0	186.5	163.8	109.7	218.3	79.2	225.5	149.3	109.4	96.7	172.8	214.3	82.6	65.3	55.8	134.4	140	60	30.9
TRUE	High	Master Protein	P78371	T-complex protein 1 subunit beta OS=Homo sapiens OX=9606 GN=CCT2 PE=1 SV=4	0	FALSE	220.226	61	27	523	27	1	535	57.5	6.46	12012	861.18	27	25	cell organization and biogenesis;metabolic process;regulation of biological process;transport	cytoplasm;cytosol;extracellular;organelle lumen	nucleotide binding;protein binding	Pf00118	10576	ENSG00000166226.12	CCT2	12				0	84.4	111.7	151.9	103.7	132.2	98.7	79.7	86.1	96.3	90	71.1	87.3	98	58.6	109.7	78.3	93.3	55.4
TRUE	High	Master Protein	P35611	Alpha-adducin OS=Homo sapiens OX=9606 GN=ADD1 PE=1 SV=2	0	FALSE	219.899	56	26	760	24	1	737	80.9	5.83	15186	1485.42	25	24	cell differentiation;cell organization and biogenesis;cellular homeostasis;metabolic process;regulation of biological process;response to stimulus;transport	cytoplasm;cytoskeleton;cytosol;membrane;nucleus	protein binding;RNA binding;structural molecule activity	Pf00596	118	ENSG00000087274.16	ADD1	4				1	128.7	170.2	69.4	120.3	86.2	125.2	112.1	93.5	126.8	137.8	106.2	34.4	97.5	60.8	55.5	60.2	99.7	43.1
TRUE	High	Master Protein	Q6ZN40	Tropomyosin 1 (Alpha), isoform CRA_f OS=Homo sapiens OX=9606 GN=TPM1 PE=1 SV=1	0	FALSE	219.893	74	36	489	3	1	326	37.4	4.72		1745.31		36	cell organization and biogenesis;cellular component movement;regulation of biological process;response to stimulus	cytoskeleton;cytosol	protein binding;structural molecule activity	Pf00261, Pf12718	7168	ENSG00000140416.19	TPM1	15			Striated Muscle Contraction	33	64.8	102.1	87	53.5	67	64.6	84.4	57.1	87.4	135.8	25.8	39.9	138.5	141.6	41.9	49.8	49.6	62.9
TRUE	High	Master Protein	P04275	von Willebrand factor OS=Homo sapiens OX=9606 GN=VWF PE=1 SV=4	0	FALSE	219.782	21	43	288	43	1	2813	309.1	5.48	5070	388.76	41	36	cell organization and biogenesis;coagulation;metabolic process;response to stimulus;transport	endoplasmic reticulum;extracellular;organelle lumen	protein binding	Pf00092, Pf00093, Pf00094, Pf01826, Pf08742	7450	ENSG00000110799.13	VWF	12	hsa04151; hsa04611; hsa04510; hsa04610; hsa04512	PI3K-Akt signaling pathway; Platelet activation; Focal adhesion; Complement and coagulation cascades; ECM-receptor interaction	Blood Clotting Cascade; Focal Adhesion; Focal Adhesion-PI3K-Akt-mTOR-signaling pathway; Complement and Coagulation Cascades	0	151.5	31.1	42.8	53.7	25.7	37.1	40.5	152.9	22	20.9	34.6	52.3	153	93.2	76.4	76.1	192.2	81.9
TRUE	High	Master Protein	P34932	Heat shock 70 kDa protein 4 OS=Homo sapiens OX=9606 GN=HSPA4 PE=1 SV=4	0	FALSE	218.592	60	34	690	32	1	840	94.3	5.19	14457	1079.81	33	32	cell organization and biogenesis;response to stimulus;transport	cytoplasm;cytosol	nucleotide binding;protein binding	Pf00012, Pf06723	3308	ENSG00000170606.14	HSPA4	5	hsa04612	Antigen processing and presentation	Parkin-Ubiquitin Proteasomal System pathway	2	123.5	128.9	83.3	152.2	115.7	169.5	138.1	101.3	137.1	178.6	82.1	188.6	55.7	44.9	106.8	158.1	56.6	46.5
TRUE	High	Master Protein	Q6UWR7	Ectonucleotide pyrophosphatase/phosphodiesterase family member 6 OS=Homo sapiens OX=9606 GN=ENPP6 PE=1 SV=2	0	FALSE	218.448	52	21	1211	21	1	440	50.2	7.99	28251	1881.98	21	21	metabolic process	extracellular;membrane	catalytic activity	Pf01663	133121	ENSG00000164303.10	ENPP6	4	hsa00565	Ether lipid metabolism		0	180.6	244.7	100.5	175.6	21.5	397.1	33.4	24.7	116.8	247.5	54	22.6	95.8	27.6	157.3	7.4	40.2	37.6
TRUE	High	Master Protein	P09525	Annexin A4 OS=Homo sapiens OX=9606 GN=ANXA4 PE=1 SV=4	0	FALSE	218.182	71	30	1164	28	1	319	35.9	6.13	33245	1670.57	29	26	cell differentiation;regulation of biological process;response to stimulus	cell surface;cytoplasm;membrane;nucleus	enzyme regulator activity;metal ion binding;protein binding	Pf00191	307		ANXA4	2			Prostaglandin Synthesis and Regulation	0	103.3	152.8	66.3	149.3	68.2	145.4	74	46.3	131.3	47.6	140.7	102.3	112.6	31.7	257.5	64.3	66.1	82.4
TRUE	High	Master Protein	P12270	Nucleoprotein TPR OS=Homo sapiens OX=9606 GN=TPR PE=1 SV=3	0	FALSE	217.899	22	41	262	41	1	2363	267.1	5.02	5428	453.86	37	36	cell division;cell organization and biogenesis;metabolic process;regulation of biological process;response to stimulus;transport	chromosome;cytoplasm;cytoskeleton;membrane;nucleus	catalytic activity;motor activity;protein binding;RNA binding;structural molecule activity;transporter activity	Pf00038, Pf01496, Pf01576, Pf02463, Pf03961, Pf04111, Pf05911, Pf07888, Pf07926, Pf09726, Pf12128, Pf13166, Pf13514	7175	ENSG00000047410.13	TPR	1	hsa03013; hsa05216; hsa05200	RNA transport; Thyroid cancer; Pathways in cancer		0	172.1	125.7	37.3	144.3	84.6	92.1	73.1	90.7	71.1	116.7	65.2	220.1	57.7	21.3	88.4	136.4	145	31.7
TRUE	High	Master Protein	Q12805	EGF-containing fibulin-like extracellular matrix protein 1 OS=Homo sapiens OX=9606 GN=EFEMP1 PE=1 SV=2	0	FALSE	217.151	58	23	553	7	1	493	54.6	5.07	10982	924.02	23	22	metabolic process;regulation of biological process;response to stimulus	cell surface;extracellular;membrane	catalytic activity;metal ion binding;protein binding;receptor activity;signal transducer activity	Pf06247, Pf07645, Pf12662, Pf12947, Pf14670	2202	ENSG00000115380.19	EFEMP1	2				16	545.8	33	25.1	31.7	7.4	243.8	10.2	23.5	26.3	78.9	43.7	71.2	101.5	45.6	179	136.4	62.8	27.9
TRUE	High	Master Protein	P23142	Fibulin-1 OS=Homo sapiens OX=9606 GN=FBLN1 PE=1 SV=4	0	FALSE	216.591	46	24	377	9	1	703	77.2	5.22	7351	655.61	24	21	cell organization and biogenesis;metabolic process;regulation of biological process;response to stimulus	extracellular	enzyme regulator activity;metal ion binding;protein binding;structural molecule activity	Pf01821, Pf07645, Pf12662, Pf14670	2192	ENSG00000077942.18	FBLN1	22				15	135.4	48.6	269.5	39.1	44.6	46.9	60.5	20.5	148	403.1	72.9	141.9	406.4	216.7	23.2	140.4	31.4	177.9
TRUE	High	Master Protein	P12277	Creatine kinase B-type OS=Homo sapiens OX=9606 GN=CKB PE=1 SV=1	0	FALSE	215.982	65	18	705	18	1	381	42.6	5.59	15825	1028.76	18	16	cellular homeostasis;metabolic process	cytoplasm;cytosol;mitochondrion;nucleus	catalytic activity;nucleotide binding;protein binding	Pf00217, Pf02807	1152	ENSG00000166165.12	CKB	14	hsa00330; hsa01100	Arginine and proline metabolism; Metabolic pathways	Urea cycle and metabolism of amino groups	0	328.1	119.5	117.1	75	133.4	25.3	54.8	118.8	158.1	44.8	222.7	63	91.8	36.3	46.3	262.9	73.3	51.3
TRUE	High	Master Protein	P51884	Lumican OS=Homo sapiens OX=9606 GN=LUM PE=1 SV=2	0	FALSE	215.596	50	21	1444	21	1	338	38.4	6.61	28589	2205.31	21	19	cell organization and biogenesis;metabolic process;regulation of biological process;response to stimulus	extracellular;organelle lumen	protein binding;structural molecule activity	Pf01462, Pf12799, Pf13855	4060	ENSG00000139329.4	LUM	12	hsa05205	Proteoglycans in cancer		0	48.5	14.9	47.1	14.9	4	12.5	23.5	48.1	9.3	45.3	23.9	89.1	494.2	631	49.8	13.7	37.4	321.8
TRUE	High	Master Protein	O75533	Splicing factor 3B subunit 1 OS=Homo sapiens OX=9606 GN=SF3B1 PE=1 SV=3	0	FALSE	215.198	39	32	320	32	1	1304	145.7	7.09	5208	461.28	32	29	cell organization and biogenesis;metabolic process;regulation of biological process;response to stimulus	nucleus;spliceosomal complex	DNA binding;protein binding;receptor activity;RNA binding;signal transducer activity	Pf02161, Pf08920, Pf12815, Pf13513	23451	ENSG00000115524.15	SF3B1	2	hsa03040	Spliceosome	mRNA Processing	0	152	152.4	61.5	157.1	69.5	120.4	50.4	64.5	86.1	95.8	90.3	50.2	26.9	64.5	71.2	153.5	104.8	47.9
TRUE	High	Master Protein	P06737	Glycogen phosphorylase, liver form OS=Homo sapiens OX=9606 GN=PYGL PE=1 SV=4	0	FALSE	214.979	48	33	531	28	1	847	97.1	7.17	10132	691.84	33	28	cell death;metabolic process;transport	cytoplasm;cytosol;extracellular;organelle lumen	catalytic activity;nucleotide binding;protein binding	Pf00343	5836	ENSG00000100504.16	PYGL	14	hsa01100; hsa04922; hsa04931; hsa00500; hsa04910	Metabolic pathways; Glucagon signaling pathway; Insulin resistance; Starch and sucrose metabolism; Insulin signaling pathway	TNF alpha Signaling Pathway; Glycogen Metabolism	1	148.1	116.6	99.4	85.4	63.3	141.2	52.3	45	76.9	74.1	99.2	249.6	97.4	80.5	199.9	331.6	80	55
TRUE	High	Master Protein	O75643	U5 small nuclear ribonucleoprotein 200 kDa helicase OS=Homo sapiens OX=9606 GN=SNRNP200 PE=1 SV=2	0	FALSE	214.76	25	39	284	39	1	2136	244.4	6.06	5507	385.42	38	29	cell differentiation;cell organization and biogenesis;metabolic process	membrane;nucleus;spliceosomal complex	catalytic activity;DNA binding;nucleotide binding;protein binding;RNA binding	Pf00270, Pf00271, Pf02889, Pf04851	23020	ENSG00000144028.14	SNRNP200	2	hsa03040	Spliceosome		0	145.8	140	69.2	120.6	117.4	136.9	73.1	66.3	58.3	119.5	74.3	43.2	58.5	36.9	76.5	272.3	266.3	41.6
TRUE	High	Master Protein	Q3BDU5	Prelamin-A/C OS=Homo sapiens OX=9606 GN=LMNA PE=1 SV=1	0	FALSE	214.567	70	46	927	4	1	487	55.6	6.65		3057.52		46	cell organization and biogenesis;regulation of biological process;response to stimulus;transport	cytosol;membrane;nucleus	protein binding;structural molecule activity	Pf00038	4000	ENSG00000160789.19	LMNA	1			Arrhythmogenic Right Ventricular Cardiomyopathy; Adipogenesis; Fas Ligand (FasL) pathway and Stress induction of Heat Shock Proteins (HSP) regulation	0	312.7	196.2	84.8	406.8	107.6	177.8	0.5	82.7	112.2	269.8	405.8	23.6	300.9	31.1	58.8	65.1	0.1	93.8
TRUE	High	Master Protein	Q00839	Heterogeneous nuclear ribonucleoprotein U OS=Homo sapiens OX=9606 GN=HNRNPU PE=1 SV=6	0	FALSE	214.359	50	30	639	30	1	825	90.5	6	13560	969.65	29	28	cell differentiation;metabolic process;regulation of biological process;response to stimulus	cell surface;chromosome;cytoplasm;membrane;nucleus;spliceosomal complex	DNA binding;nucleotide binding;protein binding;RNA binding	Pf00622, Pf13671	3192	ENSG00000153187.18	HNRNPU	1	hsa03040	Spliceosome	mRNA Processing	0	294.5	160.8	75.4	195.7	118.2	156.4	71.9	72.1	110.7	179.9	72.7	58.1	75.6	34.4	69.7	107.8	77.1	44
TRUE	High	Master Protein	P78559	Microtubule-associated protein 1A OS=Homo sapiens OX=9606 GN=MAP1A PE=1 SV=6	0	FALSE	213.761	21	38	242	36	1	2803	305.3	4.92	4222	339.57	36	34	cell organization and biogenesis	cytoplasm;cytoskeleton	protein binding;structural molecule activity	Pf12072, Pf12128	4130	ENSG00000166963.12	MAP1A	15				0	109	98.2	75.4	226.5	122.7	277.4	62.6	53.2	79.8	221.6	82.5	36.5	43.4	17.7	75.3	83.5	77.4	36.8
TRUE	High	Master Protein	A0A1C7CYX9	Dihydropyrimidinase-related protein 2 OS=Homo sapiens OX=9606 GN=DPYSL2 PE=1 SV=1	0	FALSE	213.101	70	35	746	8	1	677	73.5	6.35		2793.47		35	cell organization and biogenesis;cellular component movement;metabolic process;regulation of biological process;response to stimulus;transport	cytoplasm;cytosol;membrane;mitochondrion	catalytic activity;protein binding	Pf01979, Pf07969, Pf13147, Pf13594	1808	ENSG00000092964.17	DPYSL2	8			Regulation of Microtubule Cytoskeleton; Brain-Derived Neurotrophic Factor (BDNF) signaling pathway	34	142.7	114.9	81.3	137.2	148.9	156.6	77	57.9	118.9	163.6	95.2	36.5	84.1	37.2	128	188.5	85.3	87
TRUE	High	Master Protein	P02774	Vitamin D-binding protein OS=Homo sapiens OX=9606 GN=GC PE=1 SV=1	0	FALSE	212.475	56	24	555	2	1	474	52.9	5.54	9533	980.81	23	22	metabolic process;transport	cytosol;extracellular;organelle lumen	protein binding;transporter activity	Pf15024	2638		GC	4			Vitamin D Metabolism	21	38.1	56	53.6	48.6	98.8	58	86.4	114.9	73.8	25.9	68.1	77.2	106.8	262.5	67.5	50.9	65.7	301.9
TRUE	High	Master Protein	P04264	Keratin, type II cytoskeletal 1 OS=Homo sapiens OX=9606 GN=KRT1 PE=1 SV=6	0	FALSE	211.829	53	31	623	26	1	644	66	8.12	15289	888.47	30	26	cell death;defense response;metabolic process;regulation of biological process;response to stimulus;transport	cytoskeleton;cytosol;extracellular;membrane;nucleus	catalytic activity;motor activity;protein binding;receptor activity;structural molecule activity	Pf00038, Pf01576, Pf05103, Pf05957, Pf12128, Pf13166, Pf13514	3848	ENSG00000167768.4	KRT1	12			Corticotropin-releasing hormone signaling pathway	4	77.4	72.4	280.5	38.3	49.8	54.5	33.4	67.2	50.6	64.2	86.5	21.3	28.2	53.5	95.7	120.3	51.4	71.5
TRUE	High	Master Protein	P14866	Heterogeneous nuclear ribonucleoprotein L OS=Homo sapiens OX=9606 GN=HNRNPL PE=1 SV=2	0	FALSE	211.451	66	22	448	21	1	589	64.1	8.22	8699	838.05	22	21	metabolic process;regulation of biological process	cytoplasm;membrane;nucleus	DNA binding;protein binding;RNA binding	Pf00076, Pf13893, Pf14259	3191	ENSG00000282947.1; ENSG00000104824.16	HNRNPL	19; CHR_HG26_PATCH			mRNA Processing	1	259.2	172.6	157.7	277	164.2	193.5	72.2	112.7	127	231.4	69.5	30.7	69.5	34.9	86.6	82.1	91.4	51.7
TRUE	High	Master Protein	P49588	Alanine--tRNA ligase, cytoplasmic OS=Homo sapiens OX=9606 GN=AARS PE=1 SV=2	0	FALSE	210.81	50	30	474	30	1	968	106.7	5.53	9397	818.36	29	28	metabolic process;regulation of biological process	cytoplasm;cytosol;membrane;mitochondrion	catalytic activity;metal ion binding;nucleotide binding;RNA binding	Pf01411, Pf02272, Pf07973	16	ENSG00000090861.15	AARS	16	hsa00970	Aminoacyl-tRNA biosynthesis		0	152.9	158.8	120.6	240	128.1	205.7	93.5	120.6	193.8	244.8	111.3	59.8	70.1	11.8	140.8	137.5	43.5	39.7
TRUE	High	Master Protein	P31939	Bifunctional purine biosynthesis protein PURH OS=Homo sapiens OX=9606 GN=ATIC PE=1 SV=3	0	FALSE	210.354	70	31	620	31	1	592	64.6	6.71	10014	905.7	30	28	metabolic process;response to stimulus	cytosol;membrane;mitochondrion	catalytic activity;protein binding	Pf01808, Pf02142	471	ENSG00000138363.14	ATIC	2	hsa00670; hsa00230; hsa01100; hsa01523	One carbon pool by folate; Purine metabolism; Metabolic pathways; Antifolate resistance	One Carbon Metabolism	0	115.6	140.2	202	179.4	101.6	108.6	103.3	121.2	236.2	134.4	198.6	99.5	75	30.3	143.8	92.8	66.7	43.7
TRUE	High	Master Protein	P55786	Puromycin-sensitive aminopeptidase OS=Homo sapiens OX=9606 GN=NPEPPS PE=1 SV=2	0	FALSE	209.986	50	35	705	35	1	919	103.2	5.72	12031	881.85	34	33	metabolic process;response to stimulus	cytoplasm;cytosol;nucleus	catalytic activity;metal ion binding	Pf01433, Pf11838, Pf13485	9520	ENSG00000141279.15	NPEPPS	17				0	81.1	131.7	120.6	119.7	84.1	80.2	107.5	83.9	127.6	91.4	136.3	132.4	65.1	37.6	173.2	181.9	53.6	72.9
TRUE	High	Master Protein	Q7Z406	Myosin-14 OS=Homo sapiens OX=9606 GN=MYH14 PE=1 SV=2	0	FALSE	209.817	22	38	475	18	1	1995	227.7	5.6	9287	742.28	35	33	cell organization and biogenesis;cellular component movement;regulation of biological process;response to stimulus	cytoplasm;cytosol;membrane	catalytic activity;motor activity;nucleotide binding;protein binding	Pf00063, Pf01576	79784	ENSG00000105357.15	MYH14	19	hsa05132; hsa04810; hsa04530	Salmonella infection; Regulation of actin cytoskeleton; Tight junction		7	96.5	123	424.6	61.9	76	43	44.8	77.8	106.5	92.3	73.8	45.2	341.4	46.3	37.6	84.8	98.6	93.3
TRUE	High	Master Protein	Q8N2S1	Latent-transforming growth factor beta-binding protein 4 OS=Homo sapiens OX=9606 GN=LTBP4 PE=1 SV=2	0	FALSE	209.395	29	31	217	31	1	1624	173.3	5.43	4445	322.32	29	26	development;metabolic process;regulation of biological process;response to stimulus;transport	extracellular	catalytic activity;metal ion binding;protein binding;receptor activity;signal transducer activity	Pf00683, Pf07645, Pf12662, Pf12947	8425	ENSG00000090006.17	LTBP4	19				0	514.4	59.8	31.8	54	32.1	99.7	51.5	75.5	52.4	174.2	61.5	49.1	59.5	21	99.5	57.7	84.8	52.1
TRUE	High	Master Protein	P20810	Calpastatin OS=Homo sapiens OX=9606 GN=CAST PE=1 SV=4	0	FALSE	208.546	56	23	324	2	1	708	76.5	5.07	6653	544.39	23	21	regulation of biological process	cytosol;endoplasmic reticulum;membrane	enzyme regulator activity;protein binding;RNA binding	Pf00748	831	ENSG00000153113.23	CAST	5				20	154.7	159.2	108	208	176.6	231.9	262.1	145.4	177.7	172	39.7	43.7	74	38.1	112.3	47.2	77	49.2
TRUE	High	Master Protein	P07384	Calpain-1 catalytic subunit OS=Homo sapiens OX=9606 GN=CAPN1 PE=1 SV=1	0	FALSE	207.524	48	33	523	33	1	714	81.8	5.67	8316	739.93	33	30	cell death;cell organization and biogenesis;metabolic process;regulation of biological process;transport	cytoplasm;cytosol;extracellular;membrane;mitochondrion;vacuole	catalytic activity;metal ion binding;protein binding	Pf00648, Pf01067, Pf13833	823	ENSG00000014216.15	CAPN1	11	hsa05010; hsa04141; hsa04210	Alzheimer's disease; Protein processing in endoplasmic reticulum; Apoptosis	Focal Adhesion; Alzheimers Disease; Integrin-mediated Cell Adhesion	0	92.4	139.1	92	121.4	83.5	62	61.9	68.7	129.1	104.7	102.4	91.9	108.2	47.2	133.7	82.2	162.4	60.6
TRUE	High	Master Protein	P31040	Succinate dehydrogenase [ubiquinone] flavoprotein subunit, mitochondrial OS=Homo sapiens OX=9606 GN=SDHA PE=1 SV=2	0	FALSE	207.359	51	21	439	21	1	664	72.6	7.39	10165	800.92	21	21	metabolic process;transport	membrane;mitochondrion	catalytic activity;nucleotide binding;protein binding	Pf00890, Pf02910	6389	ENSG00000073578.16	SDHA	5	hsa01100; hsa05010; hsa01200; hsa04932; hsa05012; hsa00020; hsa00190; hsa05016	Metabolic pathways; Alzheimer's disease; Carbon metabolism; Non-alcoholic fatty liver disease (NAFLD); Parkinson's disease; Citrate cycle (TCA cycle); Oxidative phosphorylation; Huntington's disease	TCA Cycle and Deficiency of Pyruvate Dehydrogenase complex (PDHc); TCA Cycle; Amino Acid metabolism; Electron Transport Chain	0	183.5	133.9	44	164.4	101.8	167.6	102.3	90.7	63.8	124.6	87	90.7	68.1	29.1	89.7	128.3	90.2	40.7
TRUE	High	Master Protein	Q99497	Protein/nucleic acid deglycase DJ-1 OS=Homo sapiens OX=9606 GN=PARK7 PE=1 SV=2	0	FALSE	206.868	86	19	746	19	1	189	19.9	6.79	17645	1547.82	19	17	cell communication;cell organization and biogenesis;defense response;metabolic process;regulation of biological process;response to stimulus;transport	chromosome;cytoplasm;cytosol;endoplasmic reticulum;membrane;mitochondrion;nucleus;organelle lumen	antioxidant activity;catalytic activity;DNA binding;enzyme regulator activity;metal ion binding;protein binding;RNA binding	Pf01965, Pf13278	11315	ENSG00000116288.12	PARK7	1	hsa05012	Parkinson's disease	Parkinsons Disease Pathway; Synaptic Vesicle Pathway; Androgen receptor signaling pathway	0	89.3	185.9	109.1	114.6	147.2	135.5	96.7	67.9	145.3	132.4	68.4	70.2	80.6	60.3	73.8	174.5	113.5	65
TRUE	High	Master Protein	P45974	Ubiquitin carboxyl-terminal hydrolase 5 OS=Homo sapiens OX=9606 GN=USP5 PE=1 SV=2	0	FALSE	206.617	50	28	468	28	1	858	95.7	5.03	7665	720.8	28	26	metabolic process;regulation of biological process	cytosol;vacuole	catalytic activity;metal ion binding;protein binding	Pf00443, Pf00627, Pf02148, Pf13423	8078	ENSG00000111667.13	USP5	12				0	137	104.3	100.4	134.4	102.5	133.4	80.5	74.3	476.6	146.3	157.1	106.5	37.4	106.8	61.3	134	49.3	41.7
TRUE	High	Master Protein	Q9Y6N5	Sulfide:quinone oxidoreductase, mitochondrial OS=Homo sapiens OX=9606 GN=SQOR PE=1 SV=1	0	FALSE	205.736	63	25	380	25	1	450	49.9	9.11	7218	682.57	24	22	metabolic process	membrane;mitochondrion	catalytic activity	Pf07992, Pf13738	58472	ENSG00000137767.13	SQRDL; SQOR	15	hsa00920	Sulfur metabolism		0	159.2	90.7	51.5	336.1	54.6	206.5	62.6	82.7	116.6	108.3	102.1	87.2	59.5	16.1	63.9	130.8	84.2	41.3
TRUE	High	Master Protein	Q9BSJ8	Extended synaptotagmin-1 OS=Homo sapiens OX=9606 GN=ESYT1 PE=1 SV=1	0	FALSE	205.465	42	31	466	31	1	1104	122.8	5.83	9022	658.76	31	27	metabolic process;transport	endoplasmic reticulum;membrane	metal ion binding;protein binding	Pf00168	23344	ENSG00000139641.12	ESYT1	12				0	193	187.9	112	222.1	89.3	182.4	78.4	88.5	169	133.3	165.4	61.4	48.5	24.2	77.7	96.4	61.6	32.3
TRUE	High	Master Protein	Q96KP4	Cytosolic non-specific dipeptidase OS=Homo sapiens OX=9606 GN=CNDP2 PE=1 SV=2	0	FALSE	205.326	76	26	555	26	1	475	52.8	5.97	8909	909.59	26	24	metabolic process	cytoplasm;cytosol	catalytic activity;metal ion binding	Pf01546, Pf07687	55748	ENSG00000133313.14	CNDP2	18	hsa00330; hsa00410; hsa01100; hsa00340	Arginine and proline metabolism; beta-Alanine metabolism; Metabolic pathways; Histidine metabolism		0	96.1	116.2	110.3	238.4	129.5	126.6	234.2	149.6	115.6	144.2	69.6	66	60	34.7	67	131	97.6	46.9
TRUE	High	Master Protein	P04843	Dolichyl-diphosphooligosaccharide--protein glycosyltransferase subunit 1 OS=Homo sapiens OX=9606 GN=RPN1 PE=1 SV=1	0	FALSE	205.306	59	27	675	27	1	607	68.5	6.38	12538	988.93	26	25	metabolic process	cytosol;endoplasmic reticulum;membrane	catalytic activity;protein binding;RNA binding	Pf04597	6184	ENSG00000163902.11	RPN1	3	hsa01100; hsa00510; hsa04141	Metabolic pathways; N-Glycan biosynthesis; Protein processing in endoplasmic reticulum	Proteasome Degradation	0	165.7	194.4	121.6	203.6	93.5	215.2	109.1	111	113.8	173.6	123.6	50.9	53.8	20.9	103.1	96.4	53.6	34.6
TRUE	High	Master Protein	P28838	Cytosol aminopeptidase OS=Homo sapiens OX=9606 GN=LAP3 PE=1 SV=3	0	FALSE	205.264	65	28	691	28	1	519	56.1	7.93	12723	962.27	28	26	metabolic process	cytoplasm;cytosol;mitochondrion;nucleus	catalytic activity;metal ion binding	Pf00883, Pf02789	51056	ENSG00000002549.12	LAP3	4	hsa01100; hsa00330; hsa00480	Metabolic pathways; Arginine and proline metabolism; Glutathione metabolism		0	114.2	120.4	74.8	237.2	93.2	131.3	102.1	72.3	135.4	199.5	87.4	130.8	101	84.9	99.2	154.4	74.4	69.6
TRUE	High	Master Protein	Q05682	Caldesmon OS=Homo sapiens OX=9606 GN=CALD1 PE=1 SV=3	0	FALSE	205.064	31	29	397	4	1	793	93.2	5.66	9350	697.15	27	26	cellular component movement	cytoplasm;cytoskeleton;cytosol;membrane	protein binding	Pf02029	800	ENSG00000122786.19	CALD1	7	hsa04270	Vascular smooth muscle contraction	Myometrial Relaxation and Contraction Pathways	24	130.6	138.4	29.5	168.1	286.5	85.5	75.2	80.3	275	155.8	52.4	12.2	127.6	82.5	46.1	206.2	31.3	31.8
TRUE	High	Master Protein	P51991	Heterogeneous nuclear ribonucleoprotein A3 OS=Homo sapiens OX=9606 GN=HNRNPA3 PE=1 SV=2	0	FALSE	204.649	48	26	657	24	1	378	39.6	9.01	12639	1113.01	25	24	metabolic process;transport	cytoplasm;nucleus;spliceosomal complex	protein binding;RNA binding;transporter activity	Pf00076, Pf13893, Pf14259	220988	ENSG00000170144.20	HNRNPA3	2	hsa03040	Spliceosome		0	243.2	198.7	83	262.8	107.5	211.7	91.6	90.9	124.7	213	75.3	44.6	85.1	31.9	128	158.9	69.2	44.9
TRUE	High	Master Protein	Q9Y678	Coatomer subunit gamma-1 OS=Homo sapiens OX=9606 GN=COPG1 PE=1 SV=1	0	FALSE	204.171	52	33	493	30	1	874	97.7	5.47	8093	718.4	32	30	cellular component movement;transport	cytoplasm;cytosol;Golgi;membrane	protein binding;structural molecule activity	Pf01602, Pf08752	22820	ENSG00000181789.14	COPG1	3				3	187.3	152.7	133.9	230.2	58.5	129.9	73.5	91.8	146.1	149.8	98.2	99.7	46.7	28.1	112.6	215.2	95.1	32.7
TRUE	High	Master Protein	A0A024R6I7	Alpha-1-antitrypsin OS=Homo sapiens OX=9606 GN=SERPINA1 PE=1 SV=1	0	FALSE	204.138	66	36	837	9	1	418	46.7	5.59		2832.12		36	cell organization and biogenesis;coagulation;defense response;metabolic process;regulation of biological process;response to stimulus;transport	endoplasmic reticulum;extracellular;Golgi;membrane;organelle lumen	enzyme regulator activity;protein binding	Pf00079	5265	ENSG00000277377.4	SERPINA1	14; CHR_HSCHR14_7_CTG1			Complement and Coagulation Cascades	0	6.4	9.5	5.6	4.5	9.5	3.9	7	20.1	80.8	4	42.2	6.1	18.4	219.9	10.4	5.4	30.2	15.3
TRUE	High	Master Protein	Q13740	CD166 antigen OS=Homo sapiens OX=9606 GN=ALCAM PE=1 SV=2	0	FALSE	204.043	50	25	745	25	1	583	65.1	6.25	12311	1144.7	24	23	cell growth;cellular component movement;regulation of biological process;response to stimulus	extracellular;membrane	protein binding	Pf07679, Pf08205, Pf13895, Pf13927	214	ENSG00000170017.12	ALCAM	3	hsa04514	Cell adhesion molecules (CAMs)		0	80.1	228.5	56.9	251.8	72.3	102.5	58.9	161.8	160.3	313.7	28.4	66.7	149.3	11.3	133.2	14.9	32.7	32.1
TRUE	High	Master Protein	Q9NY15	Stabilin-1 OS=Homo sapiens OX=9606 GN=STAB1 PE=1 SV=3	0	FALSE	203.576	21	36	213	36	1	2570	275.3	6.49	3697	312.94	34	32	cell communication;defense response;metabolic process;regulation of biological process;response to stimulus;transport	membrane	catalytic activity;metal ion binding;protein binding;receptor activity	Pf00193, Pf02469, Pf12947	23166	ENSG00000010327.10	STAB1	3				0	105.6	46	50.3	438.1	22.4	210	52.9	52.3	91.8	168.1	83.5	62.9	56.2	53.2	49	110.1	252.8	37.2
TRUE	High	Master Protein	Q9NY65	Tubulin alpha-8 chain OS=Homo sapiens OX=9606 GN=TUBA8 PE=1 SV=1	0	FALSE	203.554	38	17	2679	2	1	449	50.1	5.06	68841	4338.16	17	14	cell organization and biogenesis;metabolic process	cytoplasm;cytoskeleton;cytosol;mitochondrion;organelle lumen	catalytic activity;nucleotide binding;protein binding;structural molecule activity	Pf00091, Pf03953	51807; 1962	ENSG00000183785.14	TUBA8; EHHADH	22; 3	hsa04145; hsa05130; hsa04210; hsa04540	Phagosome; Pathogenic Escherichia coli infection; Apoptosis; Gap junction	Mitochondrial LC-Fatty Acid Beta-Oxidation; Pathogenic Escherichia coli infection; Parkin-Ubiquitin Proteasomal System pathway	0
TRUE	High	Master Protein	P38646	Stress-70 protein, mitochondrial OS=Homo sapiens OX=9606 GN=HSPA9 PE=1 SV=2	0	FALSE	203.441	52	28	814	28	1	679	73.6	6.16	18433	1280.57	26	25	cell differentiation;cell organization and biogenesis;metabolic process;regulation of biological process;response to stimulus	cytoplasm;mitochondrion;nucleus;organelle lumen	nucleotide binding;protein binding;RNA binding	Pf00012, Pf06723	3313	ENSG00000113013.12	HSPA9	5	hsa03018; hsa05152	RNA degradation; Tuberculosis	Parkin-Ubiquitin Proteasomal System pathway	0	142.4	111.2	57.2	192.6	120.6	207.4	121.3	93	66	109.9	71.7	100.8	50.3	36.9	114.7	125	212.7	54.7
TRUE	High	Master Protein	P20700	Lamin-B1 OS=Homo sapiens OX=9606 GN=LMNB1 PE=1 SV=2	0	FALSE	202.805	56	34	547	30	1	586	66.4	5.16	10281	785.08	33	28	regulation of biological process;response to stimulus	membrane;nucleus	catalytic activity;motor activity;protein binding;structural molecule activity	Pf00038, Pf00932, Pf01576, Pf07888, Pf09726, Pf09731, Pf10186, Pf12128	4001	ENSG00000113368.11	LMNB1	5	hsa04210	Apoptosis	Fas Ligand (FasL) pathway and Stress induction of Heat Shock Proteins (HSP) regulation	0	145.1	150.3	81.3	138.1	55.4	100.6	100	89.6	80.5	149.5	100.4	47.7	50.4	28.3	119.8	245.9	83.1	87.2
TRUE	High	Master Protein	P13667	Protein disulfide-isomerase A4 OS=Homo sapiens OX=9606 GN=PDIA4 PE=1 SV=2	0	FALSE	202.533	49	32	631	32	1	645	72.9	5.07	10729	902.48	32	26	cellular homeostasis;metabolic process;regulation of biological process;response to stimulus;transport	cell surface;endoplasmic reticulum;organelle lumen	catalytic activity;metal ion binding;protein binding;RNA binding	Pf00085, Pf01216, Pf13098, Pf13848, Pf13905	9601	ENSG00000155660.10	PDIA4	7	hsa05110; hsa04918; hsa04141	Vibrio cholerae infection; Thyroid hormone synthesis; Protein processing in endoplasmic reticulum		0	154.8	162.5	72.6	174.4	74.3	116.9	53.4	53.3	167.1	118.8	115.2	131.6	79.2	48.2	137.9	381.1	65	45.7
TRUE	High	Master Protein	P09960	Leukotriene A-4 hydrolase OS=Homo sapiens OX=9606 GN=LTA4H PE=1 SV=2	0	FALSE	201.691	54	24	491	24	1	611	69.2	6.18	10198	766.57	24	21	metabolic process;transport	cytoplasm;cytosol;extracellular;nucleus	catalytic activity;metal ion binding;protein binding;RNA binding	Pf01433, Pf09127, Pf13485	4048	ENSG00000111144.9	LTA4H	12	hsa00590; hsa01100	Arachidonic acid metabolism; Metabolic pathways	Eicosanoid Synthesis	0	68.5	127	94.9	166.9	88.3	110	46.5	69.9	84.7	89.7	140.3	155.5	26.5	22.3	66.3	138.1	61.3	66.8
TRUE	High	Master Protein	P61978	Heterogeneous nuclear ribonucleoprotein K OS=Homo sapiens OX=9606 GN=HNRNPK PE=1 SV=1	0	FALSE	201.541	62	25	1476	6	1	463	50.9	5.54	31666	1981	24	24	metabolic process;regulation of biological process;response to stimulus	cytoplasm;membrane;nucleus;spliceosomal complex	DNA binding;protein binding;RNA binding	Pf00013, Pf08067, Pf13014, Pf13083	3190	ENSG00000165119.20	HNRNPK	9	hsa05206; hsa03040; hsa05203; hsa05168	MicroRNAs in cancer; Spliceosome; Viral carcinogenesis; Herpes simplex infection	mRNA Processing	19	179.5	212.3	67.5	254.2	88.5	165.7	73.7	87.8	99.3	162.8	100.4	108.8	79	33.7	132.8	179.7	73.5	51.2
TRUE	High	Master Protein	P46459	Vesicle-fusing ATPase OS=Homo sapiens OX=9606 GN=NSF PE=1 SV=3	0	FALSE	201.3	53	37	475	37	1	744	82.5	6.95	7739	627.38	35	32	cell organization and biogenesis;metabolic process;regulation of biological process;response to stimulus;transport	cytoplasm;cytosol;membrane	catalytic activity;metal ion binding;nucleotide binding;protein binding;RNA binding	Pf00004, Pf00910, Pf01078, Pf02359, Pf02933, Pf05272, Pf05496, Pf06068, Pf07724, Pf07728, Pf13173, Pf13191, Pf13207, Pf13401	4905	ENSG00000073969.18; ENSG00000278174.3; ENSG00000276262.2	NSF	17; CHR_HSCHR17_1_CTG5; CHR_HSCHR17_2_CTG5	hsa04727; hsa04721; hsa04962	GABAergic synapse; Synaptic vesicle cycle; Vasopressin-regulated water reabsorption	Synaptic Vesicle Pathway; Brain-Derived Neurotrophic Factor (BDNF) signaling pathway	0	37.9	54.3	44.2	100.4	63.2	83.7	47	41	80.9	104.4	46.2	41.4	53.9	21.2	61.2	352.6	46	35.5
TRUE	High	Master Protein	P33176	Kinesin-1 heavy chain OS=Homo sapiens OX=9606 GN=KIF5B PE=1 SV=1	0	FALSE	201.27	46	31	339	26	1	963	109.6	6.51	6164	481.26	31	27	cell differentiation;cell organization and biogenesis;cellular component movement;metabolic process;regulation of biological process;transport	cytoplasm;cytoskeleton;cytosol;membrane	catalytic activity;motor activity;nucleotide binding;protein binding	Pf00225, Pf01576, Pf02463, Pf03999, Pf04111, Pf04156, Pf05483, Pf05557, Pf05622, Pf06160, Pf07111, Pf07888, Pf10174, Pf12128, Pf13514, Pf13851, Pf14915	3799	ENSG00000170759.10	KIF5B	10	hsa04728; hsa04144	Dopaminergic synapse; Endocytosis	Insulin Signaling	5	88.6	95.3	77.4	180.3	91.1	104.5	124.7	95.3	149.1	178	126.3	98.8	36.4	193	50.8	96.9	51.2	49
TRUE	High	Master Protein	Q15084	Protein disulfide-isomerase A6 OS=Homo sapiens OX=9606 GN=PDIA6 PE=1 SV=1	0	FALSE	201.155	50	21	704	21	1	440	48.1	5.08	15351	1141.27	21	20	cellular homeostasis;metabolic process;regulation of biological process;response to stimulus;transport	cytosol;endoplasmic reticulum;membrane;organelle lumen	catalytic activity;protein binding	Pf00085, Pf13098, Pf13848, Pf13899, Pf13905	10130	ENSG00000143870.12	PDIA6	2	hsa04141	Protein processing in endoplasmic reticulum	Photodynamic therapy-induced unfolded protein response	0	132.1	164.5	93.9	209.4	97.1	147	102	93.5	133.7	131.3	159.8	87.2	96	47.5	101.3	222.9	111.4	48.8
TRUE	High	Master Protein	P27695	DNA-(apurinic or apyrimidinic site) lyase OS=Homo sapiens OX=9606 GN=APEX1 PE=1 SV=2	0	FALSE	201.087	64	19	495	19	1	318	35.5	8.12	9344	971.27	19	18	cell organization and biogenesis;cellular homeostasis;metabolic process;regulation of biological process;response to stimulus	cytoplasm;endoplasmic reticulum;mitochondrion;nucleus;ribosome	catalytic activity;DNA binding;metal ion binding;protein binding;RNA binding	Pf03372, Pf14529	328	ENSG00000100823.11	APEX1	14	hsa03410	Base excision repair	Spinal Cord Injury; Human Thyroid Stimulating Hormone (TSH) signaling pathway	0	172.5	229.1	89	265.5	124.1	130	30	86.6	149.3	132.7	102.8	130.5	60.9	20	140.2	172.3	76.8	76.6
TRUE	High	Master Protein	P30153	Serine/threonine-protein phosphatase 2A 65 kDa regulatory subunit A alpha isoform OS=Homo sapiens OX=9606 GN=PPP2R1A PE=1 SV=4	0	FALSE	200.82	51	25	731	18	1	589	65.3	5.11	18074	1290.67	24	23	cell death;cell organization and biogenesis;metabolic process;regulation of biological process;response to stimulus	chromosome;cytoplasm;cytoskeleton;cytosol;membrane;mitochondrion;nucleus	catalytic activity;enzyme regulator activity;protein binding	Pf02985, Pf13513, Pf13646	5518	ENSG00000105568.17	PPP2R1A	19	hsa04350; hsa04071; hsa04730; hsa04390; hsa05142; hsa05160; hsa03015; hsa04261; hsa04151; hsa04114; hsa04152; hsa04530; hsa04728	TGF-beta signaling pathway; Sphingolipid signaling pathway; Long-term depression; Hippo signaling pathway; Chagas disease (American trypanosomiasis); Hepatitis C; mRNA surveillance pathway; Adrenergic signaling in cardiomyocytes; PI3K-Akt signaling pathway; Oocyte meiosis; AMPK signaling pathway; Tight junction; Dopaminergic synapse	Focal Adhesion-PI3K-Akt-mTOR-signaling pathway; Wnt Signaling Pathway and Pluripotency; Glycogen Metabolism	7	128	165.2	109.9	189.5	148.2	145.3	130.8	101.5	184.7	137.7	154.3	61	50.7	20.5	86.4	132.7	98.5	35.7
TRUE	High	Master Protein	P55011	Solute carrier family 12 member 2 OS=Homo sapiens OX=9606 GN=SLC12A2 PE=1 SV=1	0	FALSE	200.647	32	27	252	26	1	1212	131.4	6.4	4594	457.41	26	23	cellular homeostasis;regulation of biological process;response to stimulus;transport	membrane	catalytic activity;nucleotide binding;protein binding;transporter activity	Pf00324, Pf08403, Pf13520	6558	ENSG00000064651.13	SLC12A2	5	hsa05110; hsa04970; hsa04972	Vibrio cholerae infection; Salivary secretion; Pancreatic secretion		1	14.6	117	112.5	91.3	207.6	183	143.2	280.7	136.7	105.1	517.6	70.4	85.4	17.3	51.8	303.4	24.6	44.5
TRUE	High	Master Protein	Q06830	Peroxiredoxin-1 OS=Homo sapiens OX=9606 GN=PRDX1 PE=1 SV=1	0	FALSE	198.776	81	20	967	17	1	199	22.1	8.13	15135	1510.27	20	20	cell proliferation;cellular homeostasis;defense response;metabolic process;regulation of biological process;response to stimulus	cytoplasm;cytosol;mitochondrion;nucleus	antioxidant activity;catalytic activity;protein binding;RNA binding	Pf00578, Pf08534, Pf10417	5052	ENSG00000117450.13	PRDX1	1	hsa04146	Peroxisome	NRF2 pathway; Selenium Micronutrient Network; Androgen receptor signaling pathway	2	40.5	119	51.5	89.3	129.8	74	77.2	82.7	90.6	69.6	155.5	161.8	165.6	51.1	114.2	151.7	124.3	79.2
TRUE	High	Master Protein	Q16531	DNA damage-binding protein 1 OS=Homo sapiens OX=9606 GN=DDB1 PE=1 SV=1	0	FALSE	198.635	32	29	372	29	1	1140	126.9	5.26	6423	524.89	27	25	cell organization and biogenesis;metabolic process;regulation of biological process;response to stimulus	cytoplasm;nucleus	DNA binding;protein binding	Pf03178, Pf10433	1642	ENSG00000167986.13	DDB1	11	hsa05203; hsa03420; hsa05161; hsa04120	Viral carcinogenesis; Nucleotide excision repair; Hepatitis B; Ubiquitin mediated proteolysis		0	96.5	114.7	42.8	136.2	52.4	88.4	58.1	63.9	88	101.5	79.1	95.4	73.8	59.8	100.7	161.9	150.1	53.1
TRUE	High	Master Protein	P17858	ATP-dependent 6-phosphofructokinase, liver type OS=Homo sapiens OX=9606 GN=PFKL PE=1 SV=6	0	FALSE	197.95	45	25	492	22	1	780	85	7.5	11249	842.07	25	23	cell organization and biogenesis;metabolic process;regulation of biological process;response to stimulus;transport	cytoplasm;cytosol;extracellular;membrane;organelle lumen	catalytic activity;metal ion binding;nucleotide binding;protein binding	Pf00365	5211	ENSG00000141959.16	PFKL	21	hsa04152; hsa00052; hsa01230; hsa00051; hsa05230; hsa00010; hsa00030; hsa04922; hsa01100; hsa01200; hsa03018; hsa04066	AMPK signaling pathway; Galactose metabolism; Biosynthesis of amino acids; Fructose and mannose metabolism; Central carbon metabolism in cancer; Glycolysis / Gluconeogenesis; Pentose phosphate pathway; Glucagon signaling pathway; Metabolic pathways; Carbon metabolism; RNA degradation; HIF-1 signaling pathway	Photodynamic therapy-induced HIF-1 survival signaling; Insulin Signaling; Glycolysis and Gluconeogenesis	3	54.4	67.7	35.7	57.2	42.5	44.7	101	59	51.9	46.3	59.1	38.4	37.9	86	52	57.3	455.8	30.6
TRUE	High	Master Protein	P00488	Coagulation factor XIII A chain OS=Homo sapiens OX=9606 GN=F13A1 PE=1 SV=4	0	FALSE	196.283	40	25	487	24	1	732	83.2	6.09	8823	791.91	23	24	coagulation;metabolic process;response to stimulus;transport	cytoplasm;extracellular;organelle lumen	catalytic activity;metal ion binding	Pf00868, Pf00927, Pf01841	2162		F13A1	6	hsa04610	Complement and coagulation cascades		1	63.1	19.6	107.3	216.2	52.9	105.3	158.4	154.8	86.9	117.1	108.7	29.5	66.5	47	28.1	55.9	32.2	26.2
TRUE	High	Master Protein	Q9NZB2	Constitutive coactivator of PPAR-gamma-like protein 1 OS=Homo sapiens OX=9606 GN=FAM120A PE=1 SV=2	0	FALSE	195.758	32	26	240	26	1	1118	121.8	8.88	4732	405.32	25	23		cytoplasm;cytosol;membrane;nucleus	RNA binding		23196	ENSG00000048828.16	FAM120A	9				0	63.2	46.7	29.5	97.8	31.8	41.1	27.7	32.9	48.2	64.5	65.3	26.6	18	31	62.5	61.5	50.5	17.2
TRUE	High	Master Protein	P30041	Peroxiredoxin-6 OS=Homo sapiens OX=9606 GN=PRDX6 PE=1 SV=3	0	FALSE	195.689	79	23	1043	23	1	224	25	6.38	21791	1370.74	23	20	cellular homeostasis;metabolic process;regulation of biological process;response to stimulus;transport	cytoplasm;cytosol;extracellular;membrane;nucleus;organelle lumen;vacuole	antioxidant activity;catalytic activity;protein binding	Pf00578, Pf08534, Pf10417	9588	ENSG00000117592.8	PRDX6	1	hsa01100	Metabolic pathways	NRF2 pathway	0	93.8	97.6	111.8	177.6	126	95.9	102.5	68	78.8	109.3	82.4	79	66.6	29.7	69.2	301.5	91.4	66.8
TRUE	High	Master Protein	A0A0R4J2E8	Matrin-3 OS=Homo sapiens OX=9606 GN=MATR3 PE=1 SV=1	0	FALSE	195.42	38	24	450	24	1	847	94.6	6.25	8667	784.92	23	21	defense response;regulation of biological process;response to stimulus	membrane;nucleus	metal ion binding;protein binding;RNA binding;structural molecule activity	Pf00076, Pf13893, Pf14259	9782	ENSG00000015479.18; ENSG00000280987.4	MATR3	5				0	154.4	129.5	61.6	181.6	66.9	164.7	64	77	89.9	144.3	74.8	57	76.5	122.9	139.3	163.5	194	44.1
TRUE	High	Master Protein	Q10567	AP-1 complex subunit beta-1 OS=Homo sapiens OX=9606 GN=AP1B1 PE=1 SV=2	0	FALSE	195.233	40	33	382	13	1	949	104.6	5.06	6351	523.35	32	30	regulation of biological process;transport	cytosol;Golgi;membrane	protein binding;transporter activity	Pf01602, Pf02883, Pf09066, Pf12717, Pf13646	162		AP1B1	22	hsa04142	Lysosome		0	53.4	72.5	46.6	114.5	65.8	65.8	44.5	33.9	55.8	54.8	84.7	59.2	34.7	27	61.5	105.3	29	33.1
TRUE	High	Master Protein	P01008	Antithrombin-III OS=Homo sapiens OX=9606 GN=SERPINC1 PE=1 SV=1	0	FALSE	195.149	58	27	317	27	1	464	52.6	6.71	6145	405.6	25	24	coagulation;defense response;metabolic process;regulation of biological process;response to stimulus;transport	extracellular;membrane;organelle lumen	enzyme regulator activity;protein binding	Pf00079	462	ENSG00000117601.13	SERPINC1	1	hsa04610	Complement and coagulation cascades	Complement and Coagulation Cascades	0	13.1	10.5	141.4	15.8	528.5	65	685.8	39.6	12.6	15.9	861.2	16.1	86.8	53.4	19.2	17	24.5	62.8
TRUE	High	Master Protein	P53396	ATP-citrate synthase OS=Homo sapiens OX=9606 GN=ACLY PE=1 SV=3	0	FALSE	195.062	37	32	429	32	1	1101	120.8	7.33	9065	565.25	31	30	metabolic process;regulation of biological process;transport	cytoplasm;cytosol;extracellular;membrane;organelle lumen	catalytic activity;metal ion binding;nucleotide binding;protein binding	Pf00285, Pf00549, Pf02629, Pf08442	47	ENSG00000131473.16	ACLY	17	hsa01100; hsa00020	Metabolic pathways; Citrate cycle (TCA cycle)	Amino Acid metabolism; Sterol Regulatory Element-Binding Proteins (SREBP) signalling; Fatty Acid Biosynthesis; TCA Cycle and Deficiency of Pyruvate Dehydrogenase complex (PDHc)	0	177	110.7	82.6	158.8	70.6	91.5	55.1	63.9	104.8	116	105.8	69.4	53.1	35.8	91.5	116.2	73.3	30.8
TRUE	High	Master Protein	Q9BXN1	Asporin OS=Homo sapiens OX=9606 GN=ASPN PE=1 SV=2	0	FALSE	194.303	58	23	397	23	1	380	43.4	7.08	7073	605.06	22	18	regulation of biological process;response to stimulus	cytoplasm;extracellular	enzyme regulator activity;metal ion binding;protein binding	Pf01462, Pf12799, Pf13855	54829	ENSG00000106819.11	ASPN	9				0	143.5	11.1	16.7	17.7	14.8	11.5	111.2	161.3	14.5	15	9.2	33.6	212.4	317.1	93.8	21.3	104.5	361
TRUE	High	Master Protein	P16615	Sarcoplasmic/endoplasmic reticulum calcium ATPase 2 OS=Homo sapiens OX=9606 GN=ATP2A2 PE=1 SV=1	0	FALSE	193.87	31	27	365	27	1	1042	114.7	5.34	6836	576.68	27	26	cell organization and biogenesis;cellular homeostasis;regulation of biological process;response to stimulus;transport	endoplasmic reticulum;membrane	catalytic activity;metal ion binding;nucleotide binding;protein binding;transporter activity	Pf00122, Pf00689, Pf00690, Pf00702, Pf08282, Pf12710, Pf13246	488	ENSG00000174437.16	ATP2A2	12	hsa04261; hsa05414; hsa04024; hsa04972; hsa04022; hsa05410; hsa04260; hsa04020; hsa05010; hsa04919; hsa05412	Adrenergic signaling in cardiomyocytes; Dilated cardiomyopathy; cAMP signaling pathway; Pancreatic secretion; cGMP-PKG signaling pathway; Hypertrophic cardiomyopathy (HCM); Cardiac muscle contraction; Calcium signaling pathway; Alzheimer's disease; Thyroid hormone signaling pathway; Arrhythmogenic right ventricular cardiomyopathy (ARVC)	Endothelin Pathways; Arrhythmogenic Right Ventricular Cardiomyopathy; Myometrial Relaxation and Contraction Pathways; Alzheimers Disease; Calcium Regulation in the Cardiac Cell	0	168.5	122.7	63	179.1	158.3	238.8	100	113.3	134.2	143.8	125.8	91.4	34.7	49.8	70.2	125.2	147.6	59.1
TRUE	High	Master Protein	P07195	L-lactate dehydrogenase B chain OS=Homo sapiens OX=9606 GN=LDHB PE=1 SV=2	0	FALSE	193.771	68	23	1125	22	1	334	36.6	6.05	25542	1694.36	22	21	metabolic process	cytoplasm;cytosol;membrane;mitochondrion	catalytic activity;nucleotide binding;protein binding	Pf00056, Pf02866	3945	ENSG00000111716.12	LDHB	12	hsa00010; hsa00640; hsa00270; hsa04922; hsa01100; hsa00620	Glycolysis / Gluconeogenesis; Propanoate metabolism; Cysteine and methionine metabolism; Glucagon signaling pathway; Metabolic pathways; Pyruvate metabolism	Glycolysis and Gluconeogenesis	0	63.4	135.9	64.4	222.8	145.9	106	70.3	85.1	176.5	127.6	58.1	61.4	56.7	88.9	131.4	92.1	66.6	59.3
TRUE	High	Master Protein	P55084	Trifunctional enzyme subunit beta, mitochondrial OS=Homo sapiens OX=9606 GN=HADHB PE=1 SV=3	0	FALSE	193.403	61	26	541	26	1	474	51.3	9.41	9775	787.4	25	25	metabolic process	endoplasmic reticulum;membrane;mitochondrion	catalytic activity;protein binding;RNA binding	Pf00108, Pf00109, Pf02803	3032	ENSG00000138029.13	HADHB	2	hsa00062; hsa01212; hsa01100; hsa00071; hsa00280	Fatty acid elongation; Fatty acid metabolism; Metabolic pathways; Fatty acid degradation; Valine, leucine and isoleucine degradation	Valproic acid pathway; Fatty Acid Beta Oxidation; Sudden Infant Death Syndrome (SIDS) Susceptibility Pathways	0	95	76.8	51.6	119.8	45.2	103.6	29.2	27.6	24.5	61.2	50.2	46.9	55.6	27.8	98.3	84.8	55	38
TRUE	High	Master Protein	P19367	Hexokinase-1 OS=Homo sapiens OX=9606 GN=HK1 PE=1 SV=3	0	FALSE	192.498	45	35	448	32	1	917	102.4	6.8	8768	542.01	34	28	cellular homeostasis;metabolic process;regulation of biological process	cytosol;membrane;mitochondrion	catalytic activity;nucleotide binding;protein binding	Pf00349, Pf03727	3098	ENSG00000156515.21	HK1	10	hsa00010; hsa00052; hsa04910; hsa00520; hsa00500; hsa05230; hsa04930; hsa01100; hsa01200; hsa04973; hsa04066; hsa00051; hsa00524	Glycolysis / Gluconeogenesis; Galactose metabolism; Insulin signaling pathway; Amino sugar and nucleotide sugar metabolism; Starch and sucrose metabolism; Central carbon metabolism in cancer; Type II diabetes mellitus; Metabolic pathways; Carbon metabolism; Carbohydrate digestion and absorption; HIF-1 signaling pathway; Fructose and mannose metabolism; Neomycin, kanamycin and gentamicin biosynthe…	Photodynamic therapy-induced HIF-1 survival signaling; Glycolysis and Gluconeogenesis; Cori Cycle; Glucuronidation	3	73.8	45.1	32.6	98.6	101.4	62.9	28	40.1	78.1	70.6	101.7	61.3	35.7	53.2	43.7	186.9	81.1	37.1
TRUE	High	Master Protein	P48643	T-complex protein 1 subunit epsilon OS=Homo sapiens OX=9606 GN=CCT5 PE=1 SV=1	0	FALSE	192.321	63	27	452	26	1	541	59.6	5.66	7734	618.18	27	23	metabolic process;regulation of biological process;response to stimulus;transport	cytoplasm;cytoskeleton;cytosol	nucleotide binding;protein binding;RNA binding	Pf00118	22948	ENSG00000150753.11	CCT5	5				1	125.4	135.2	70.7	122.7	110.2	131.8	79.5	61.7	90	122.8	74	51.6	74.4	37.6	63.9	85.2	63.4	64.4
TRUE	High	Master Protein	P26599	Polypyrimidine tract-binding protein 1 OS=Homo sapiens OX=9606 GN=PTBP1 PE=1 SV=1	0	FALSE	192.114	59	19	557	17	1	531	57.2	9.17	12727	998.11	17	17	metabolic process;regulation of biological process;response to stimulus	membrane;nucleus	protein binding;RNA binding	Pf00076, Pf13893, Pf14259	5725	ENSG00000011304.19	PTBP1	19			mRNA Processing; mir-124 predicted interactions with cell cycle and differentiation	2	241	200.1	93.4	211.9	102.2	180.2	103.5	107.1	122.8	154.3	82.7	35.3	106.2	44.9	109.2	114	68.6	36.6
TRUE	High	Master Protein	Q13200	26S proteasome non-ATPase regulatory subunit 2 OS=Homo sapiens OX=9606 GN=PSMD2 PE=1 SV=3	0	FALSE	191.321	38	28	401	28	1	908	100.1	5.2	7159	585.64	27	24	metabolic process;regulation of biological process;response to stimulus;transport	cytoplasm;cytosol;extracellular;membrane;nucleus;organelle lumen;proteasome	catalytic activity;enzyme regulator activity;nucleotide binding;protein binding	Pf01851	5708	ENSG00000175166.16	PSMD2	3	hsa03050; hsa05169	Proteasome; Epstein-Barr virus infection	Parkin-Ubiquitin Proteasomal System pathway; Proteasome Degradation; TNF alpha Signaling Pathway	0	60	114.4	57.9	138.5	61.2	61.1	49.9	65	115.6	112.9	55.9	69.2	42.2	30.9	67.1	84.7	64.3	33
TRUE	High	Master Protein	Q9H4A4	Aminopeptidase B OS=Homo sapiens OX=9606 GN=RNPEP PE=1 SV=2	0	FALSE	191.218	56	28	490	28	1	650	72.5	5.74	8396	716.3	27	26	metabolic process	extracellular;membrane	catalytic activity;metal ion binding	Pf01433, Pf09127, Pf13485	6051	ENSG00000176393.10	RNPEP	1				0	138.8	140.4	142.5	233.4	86.9	90	72.5	104.3	190.6	112.8	144.6	103.9	78.3	36.5	87.3	155	85.5	53.2
TRUE	High	Master Protein	O95782	AP-2 complex subunit alpha-1 OS=Homo sapiens OX=9606 GN=AP2A1 PE=1 SV=3	0	FALSE	191.156	49	36	579	29	1	977	107.5	7.03	9232	789.52	35	28	cell organization and biogenesis;cellular component movement;metabolic process;regulation of biological process;response to stimulus;transport	cytosol;membrane	protein binding;transporter activity	Pf01602, Pf02296, Pf02883, Pf13646	160	ENSG00000196961.12	AP2A1	19	hsa05016; hsa04961; hsa04144; hsa04721	Huntington's disease; Endocrine and other factor-regulated calcium reabsorption; Endocytosis; Synaptic vesicle cycle	Synaptic Vesicle Pathway; EGF/EGFR Signaling Pathway	7	113.6	79.3	59.1	132.9	73.1	109.4	56.1	43.2	83.7	157.9	71.4	76.6	58.2	68.8	63.8	175.8	60.8	36.5
TRUE	High	Master Protein	P00387	NADH-cytochrome b5 reductase 3 OS=Homo sapiens OX=9606 GN=CYB5R3 PE=1 SV=3	0	FALSE	190.289	80	18	499	18	1	301	34.2	7.59	7859	744.04	16	16	metabolic process;transport	cytoplasm;endoplasmic reticulum;extracellular;membrane;mitochondrion;organelle lumen	catalytic activity;nucleotide binding;protein binding	Pf00175, Pf00970, Pf08030	1727	ENSG00000100243.20	CYB5R3	22	hsa00520	Amino sugar and nucleotide sugar metabolism	Oxidation by Cytochrome P450	0	129.9	138.4	63.4	96.2	102	107.8	245.3	112.2	115.9	68.3	120.1	26	32.1	251.7	45.5	22.8	39.6	32.3
TRUE	High	Master Protein	Q16891	MICOS complex subunit MIC60 OS=Homo sapiens OX=9606 GN=IMMT PE=1 SV=1	0	FALSE	188.976	41	26	433	10	1	758	83.6	6.48	8820	656.66	26	20	cell organization and biogenesis;cellular homeostasis	membrane;mitochondrion	protein binding;RNA binding	Pf09731	10989	ENSG00000132305.20	IMMT	2				15	141.5	142.9	63.5	177.9	94.8	129.5	192.8	88.2	90.8	76.8	102.4	68.9	84.4	33.1	85.2	125.5	84.6	42.6
TRUE	High	Master Protein	P52272	Heterogeneous nuclear ribonucleoprotein M OS=Homo sapiens OX=9606 GN=HNRNPM PE=1 SV=3	0	FALSE	188.889	56	29	452	29	1	730	77.5	8.7	8710	670.1	27	25	metabolic process;regulation of biological process;response to stimulus	membrane;nucleus;spliceosomal complex	protein binding;RNA binding	Pf00076, Pf11532, Pf11608, Pf13893, Pf14259	4670	ENSG00000099783.11	HNRNPM	19	hsa03040	Spliceosome	mRNA Processing	0	239	146.6	67.6	171.8	67.3	161.8	93.9	89	105.9	159.8	101	49.8	99	40	129.9	218.8	73.7	46
TRUE	High	Master Protein	P19823	Inter-alpha-trypsin inhibitor heavy chain H2 OS=Homo sapiens OX=9606 GN=ITIH2 PE=1 SV=2	0	FALSE	188.651	35	22	295	22	1	946	106.4	6.86	5550	399.11	21	20	metabolic process;regulation of biological process	extracellular;organelle lumen	enzyme regulator activity	Pf00092, Pf06668, Pf08487, Pf13519, Pf13768	3698	ENSG00000151655.18	ITIH2	10				0	41.7	60.5	156.5	66.1	150.8	137.3	140.5	94.8	58.9	112	101.5	42.9	119.7	87.4	78.3	87.2	65.6	383.4
TRUE	High	Master Protein	P06744	Glucose-6-phosphate isomerase OS=Homo sapiens OX=9606 GN=GPI PE=1 SV=4	0	FALSE	187.905	54	22	932	22	1	558	63.1	8.32	19546	1657.23	21	20	metabolic process;regulation of biological process;response to stimulus;transport	cytoplasm;cytosol;extracellular;membrane;organelle lumen	catalytic activity;protein binding	Pf00342	2821	ENSG00000105220.14	GPI	19	hsa00010; hsa01100; hsa00500; hsa00520; hsa00030; hsa01200	Glycolysis / Gluconeogenesis; Metabolic pathways; Starch and sucrose metabolism; Amino sugar and nucleotide sugar metabolism; Pentose phosphate pathway; Carbon metabolism	Cori Cycle; Glycolysis and Gluconeogenesis	0	154.6	138.6	101	178	103	132.8	142.3	71	132.1	130.4	119.4	100.6	43.9	36.3	124.7	116.7	80.4	37.1
TRUE	High	Master Protein	Q9UEY8	Gamma-adducin OS=Homo sapiens OX=9606 GN=ADD3 PE=1 SV=1	0	FALSE	187.616	37	26	485	25	1	706	79.1	6.32	8818	798.7	24	25	cell organization and biogenesis;transport	chromosome;cytoplasm;cytoskeleton;cytosol;membrane	protein binding;structural molecule activity	Pf00596	120	ENSG00000148700.14	ADD3	10				1	129.7	196.4	77	123.1	70.1	133.7	69.2	78.3	135.9	118.7	96.2	31	84.5	26.2	52.8	34.4	60.7	35.8
TRUE	High	Master Protein	P19338	Nucleolin OS=Homo sapiens OX=9606 GN=NCL PE=1 SV=3	0	FALSE	186.785	35	29	1014	29	1	710	76.6	4.7	21444	1524.26	28	24	regulation of biological process;response to stimulus	cytoplasm;membrane;nucleus	DNA binding;protein binding;RNA binding	Pf00076, Pf13893, Pf14259	4691	ENSG00000115053.15	NCL	2	hsa05130	Pathogenic Escherichia coli infection	VEGFA-VEGFR2 Signaling Pathway; Pathogenic Escherichia coli infection	0	66.2	153.5	133.9	134.1	149.2	47.1	146.1	134.9	162.4	93.2	23.1	32.1	22.5	33.5	75.8	44.7	329.5	16.2
TRUE	High	Master Protein	H3BTN5	Pyruvate kinase (Fragment) OS=Homo sapiens OX=9606 GN=PKM PE=1 SV=1	0	FALSE	185.975	62	31	1322	3	1	485	53	6.84		5268.96		31	metabolic process	cytosol	catalytic activity;metal ion binding	Pf00224, Pf02887		ENSG00000067225.17		15			Amino Acid metabolism	2	9.2	26.3	21.2	32.1	111.4	46.6	161.5	138.9	40.6	52.7	106.8	36.6	171.5	0.9	175.1	17.9	1.8	36.3
TRUE	High	Master Protein	P61158	Actin-related protein 3 OS=Homo sapiens OX=9606 GN=ACTR3 PE=1 SV=3	0	FALSE	185.901	67	21	661	21	1	418	47.3	5.88	12329	1118.85	21	20	cell division;cell organization and biogenesis;cellular component movement;regulation of biological process;response to stimulus	cytoplasm;cytoskeleton;cytosol;membrane	nucleotide binding;protein binding;structural molecule activity	Pf00022	10096	ENSG00000115091.11	ACTR3	2			Association Between Physico-Chemical Features and Toxicity Associated Pathways	0	177.4	223.6	97.5	251.6	114.6	165.6	73.2	71.9	216.3	148	155.4	83.9	65.2	65.4	60.9	83.7	130.5	43.9
TRUE	High	Master Protein	Q6UWY5	Olfactomedin-like protein 1 OS=Homo sapiens OX=9606 GN=OLFML1 PE=1 SV=2	0	FALSE	185.56	66	23	399	23	1	402	45.9	8.09	7199	581.16	23	20		extracellular		Pf02191	283298	ENSG00000183801.7	OLFML1	11				0	143.3	14.6	496.8	22.9	5.8	24.1	8.5	10.9	21.6	24.9	24.9	17.4	583.2	294.7	46.9	10.7	120.7	210.3
TRUE	High	Master Protein	P06727	Apolipoprotein A-IV OS=Homo sapiens OX=9606 GN=APOA4 PE=1 SV=3	0	FALSE	185.422	59	27	356	27	1	396	45.4	5.38	6289	512.34	27	26	cell organization and biogenesis;defense response;metabolic process;regulation of biological process;response to stimulus;transport	cell surface;cytosol;endosome;extracellular;organelle lumen	antioxidant activity;catalytic activity;enzyme regulator activity;metal ion binding;protein binding;transporter activity	Pf01442, Pf06386, Pf07902	337		APOA4	11			Statin Pathway	0	54.6	25.4	44.7	38.9	48.5	125.7	62	41.5	35.7	97.5	158.9	260	76.2	209.4	39.9	156.3	32.8	106.4
TRUE	High	Master Protein	P01860	Immunoglobulin heavy constant gamma 3 OS=Homo sapiens OX=9606 GN=IGHG3 PE=1 SV=2	0	FALSE	183.612	55	17	1366	7	1	377	41.3	7.9	23320	2345.16	17	16	cell organization and biogenesis;defense response;metabolic process;regulation of biological process;response to stimulus	extracellular;membrane	catalytic activity;protein binding	Pf07654, Pf08205	3502		IGHG3	14				3	72.9	51	124.6	73.8	56.4	101	100.4	106.3	58.7	73.8	146.3	118	164.2	277.4	72.5	48.1	39.9	413.2
TRUE	High	Master Protein	P23528	Cofilin-1 OS=Homo sapiens OX=9606 GN=CFL1 PE=1 SV=3	0	FALSE	183.259	73	17	1269	13	1	166	18.5	8.09	26492	2418.5	17	15	cell organization and biogenesis;cellular component movement;metabolic process;regulation of biological process;response to stimulus	cytoplasm;cytoskeleton;cytosol;membrane;nucleus	protein binding	Pf00241	1072	ENSG00000172757.12	CFL1	11	hsa04360; hsa05133; hsa04810; hsa04666	Axon guidance; Pertussis; Regulation of actin cytoskeleton; Fc gamma R-mediated phagocytosis	VEGFA-VEGFR2 Signaling Pathway; G13 Signaling Pathway; Regulation of Actin Cytoskeleton; Brain-Derived Neurotrophic Factor (BDNF) signaling pathway; EGF/EGFR Signaling Pathway	4	159.6	174.5	148.7	240.3	117.4	93.4	92.9	61.7	185.8	153.2	139.7	63.4	73.1	77	64.4	106.9	62.1	55.3
TRUE	High	Master Protein	P26640	Valine--tRNA ligase OS=Homo sapiens OX=9606 GN=VARS PE=1 SV=4	0	FALSE	182.982	34	31	319	31	1	1264	140.4	7.59	5580	444.06	30	28	metabolic process;regulation of biological process	cytoplasm;cytosol;mitochondrion	catalytic activity;nucleotide binding;protein binding	Pf00043, Pf00133, Pf08264, Pf09334, Pf13603	7407; 57176	ENSG00000096171.14; ENSG00000204394.12; ENSG00000226589.9	VARS; VARS2	6; CHR_HSCHR6_MHC_DBB_CTG1; CHR_HSCHR6_MHC_COX_CTG1	hsa00970	Aminoacyl-tRNA biosynthesis	Amino Acid metabolism	0	40.8	51.3	29.3	103.7	45.1	73	45	50.3	43.9	57.6	54.1	73.9	33.5	23.4	106.7	89.7	42.4	33.3
TRUE	High	Master Protein	P60842	Eukaryotic initiation factor 4A-I OS=Homo sapiens OX=9606 GN=EIF4A1 PE=1 SV=1	0	FALSE	182.331	81	27	589	15	1	406	46.1	5.48	11339	887.15	26	26	metabolic process;regulation of biological process	cytoplasm;cytosol;membrane;nucleus	catalytic activity;DNA binding;nucleotide binding;protein binding;RNA binding	Pf00270, Pf00271, Pf04851	1973	ENSG00000161960.14	EIF4A1	17	hsa03013	RNA transport	Translation Factors; Interferon type I signaling pathways	12	134.2	122.7	65.2	172.8	75.1	107.8	60	70.4	91.2	100.5	77.1	114.6	103.8	61.5	167.6	148	59.2	63.9
TRUE	High	Master Protein	P63104	14-3-3 protein zeta/delta OS=Homo sapiens OX=9606 GN=YWHAZ PE=1 SV=1	0	FALSE	182.262	75	24	1294	20	1	245	27.7	4.79	28956	2187.27	22	20	cell organization and biogenesis;metabolic process;regulation of biological process;response to stimulus;transport	cytoplasm;cytosol;membrane;mitochondrion;nucleus	catalytic activity;protein binding;RNA binding	Pf00244	7534	ENSG00000164924.17	YWHAZ	8	hsa04110; hsa05169; hsa05203; hsa04114; hsa05161; hsa04151; hsa04390; hsa05130	Cell cycle; Epstein-Barr virus infection; Viral carcinogenesis; Oocyte meiosis; Hepatitis B; PI3K-Akt signaling pathway; Hippo signaling pathway; Pathogenic Escherichia coli infection	Pathogenic Escherichia coli infection; Sudden Infant Death Syndrome (SIDS) Susceptibility Pathways; Myometrial Relaxation and Contraction Pathways; Prolactin Signaling Pathway; Calcium Regulation in the Cardiac Cell; Cell Cycle	5	159.4	186.7	61.4	146.4	166.3	135.6	114.5	96.6	143.7	114.6	131	105.7	51.7	22.6	142.5	132.8	84.4	63.3
TRUE	High	Master Protein	P02749	Beta-2-glycoprotein 1 OS=Homo sapiens OX=9606 GN=APOH PE=1 SV=3	0	FALSE	181.948	58	17	600	17	1	345	38.3	7.97	9219	1063.69	16	17	metabolic process;regulation of biological process;response to stimulus;transport	cell surface;extracellular;organelle lumen	enzyme regulator activity;protein binding	Pf00084, Pf09014	350	ENSG00000091583.10	APOH	17				0	61.4	51.6	101.8	65.5	67.6	96.2	122.1	130.7	52	108.9	213.7	42.2	176.3	144.3	135.1	26.4	93.2	223.4
TRUE	High	Master Protein	P12268	Inosine-5'-monophosphate dehydrogenase 2 OS=Homo sapiens OX=9606 GN=IMPDH2 PE=1 SV=2	0	FALSE	181.236	54	20	278	20	1	514	55.8	6.9	5370	458.61	19	19	cell organization and biogenesis;cell proliferation;metabolic process;response to stimulus;transport	cytoplasm;cytosol;extracellular;membrane;nucleus;organelle lumen	catalytic activity;DNA binding;metal ion binding;nucleotide binding;protein binding;RNA binding	Pf00478, Pf00571, Pf00977, Pf01070, Pf03060	3615	ENSG00000178035.11	IMPDH2	3	hsa00230; hsa00983; hsa01100	Purine metabolism; Drug metabolism - other enzymes; Metabolic pathways		0	106	253.8	122.3	253.8	89.4	149.9	68	55.1	133.3	140.2	70.2	41.8	68.5	42.3	117.7	77.9	77.7	27
TRUE	High	Master Protein	P21399	Cytoplasmic aconitate hydratase OS=Homo sapiens OX=9606 GN=ACO1 PE=1 SV=3	0	FALSE	180.555	47	29	442	29	1	889	98.3	6.68	7482	551.54	29	25	cellular homeostasis;metabolic process;regulation of biological process;response to stimulus;transport	cytoplasm;cytosol;endoplasmic reticulum;Golgi;mitochondrion	catalytic activity;metal ion binding;protein binding;RNA binding	Pf00330, Pf00694	48	ENSG00000122729.18	ACO1	9	hsa01200; hsa01210; hsa00020; hsa01100; hsa00630; hsa01230	Carbon metabolism; 2-Oxocarboxylic acid metabolism; Citrate cycle (TCA cycle); Metabolic pathways; Glyoxylate and dicarboxylate metabolism; Biosynthesis of amino acids	Iron metabolism in placenta; TCA Cycle and Deficiency of Pyruvate Dehydrogenase complex (PDHc)	0	91	90.1	127.1	141	57.1	72.7	57.3	50.4	115.3	108.6	88.1	115.7	61.3	53	115.8	165.7	61.5	41.4
TRUE	High	Master Protein	E9PKU7	Neutral alpha-glucosidase AB OS=Homo sapiens OX=9606 GN=GANAB PE=1 SV=1	0	FALSE	180.385	59	33	414	5	1	852	96.5	5.94		1540.28		33	metabolic process	Golgi;membrane;organelle lumen	catalytic activity;RNA binding	Pf01055, Pf13802	23193	ENSG00000089597.16	GANAB	11				0	123.9	111.5	138.4	79.5	105.3	179.1	167.6	147.2	123.1	178.9	58.3	29.5	63.9	58.6	80.9	71.2	66.4	22.6
TRUE	High	Master Protein	P15311	Ezrin OS=Homo sapiens OX=9606 GN=EZR PE=1 SV=4	0	FALSE	180.033	49	32	897	22	1	586	69.4	6.27	15801	1146.7	31	29	cell differentiation;cell organization and biogenesis;cellular component movement;metabolic process;regulation of biological process;response to stimulus;transport	cytoplasm;cytoskeleton;cytosol;endosome;membrane	protein binding;RNA binding	Pf00373, Pf00769, Pf09379, Pf09380	7430	ENSG00000092820.17	EZR	6	hsa05205; hsa04971; hsa05130; hsa04810; hsa05206; hsa04670	Proteoglycans in cancer; Gastric acid secretion; Pathogenic Escherichia coli infection; Regulation of actin cytoskeleton; MicroRNAs in cancer; Leukocyte transendothelial migration	AGE/RAGE pathway; Regulation of Actin Cytoskeleton; VEGFA-VEGFR2 Signaling Pathway; Pathogenic Escherichia coli infection	1	58.8	142.9	52.2	70.2	175.6	70.1	93.6	100.3	189.7	77.2	208.8	31.9	37.8	26.5	68.1	45.9	30.6	45.2
TRUE	High	Master Protein	P53618	Coatomer subunit beta OS=Homo sapiens OX=9606 GN=COPB1 PE=1 SV=3	0	FALSE	179.968	33	22	360	22	1	953	107.1	6.05	5823	579.03	22	21	transport	cytoplasm;cytosol;Golgi;membrane	protein binding;structural molecule activity	Pf01602, Pf07718, Pf14806	1315	ENSG00000129083.12	COPB1	11				0	205.2	169.7	114.4	222.6	70.5	175.8	100.1	81.5	104.3	157.7	133.3	79.7	52.6	435	82.9	118.4	47.2	29.2
TRUE	High	Master Protein	P49368	T-complex protein 1 subunit gamma OS=Homo sapiens OX=9606 GN=CCT3 PE=1 SV=4	0	FALSE	179.8	68	28	489	28	1	545	60.5	6.49	8939	711.15	27	25	cell organization and biogenesis;metabolic process;regulation of biological process;transport	cytoplasm;cytoskeleton;cytosol;membrane	nucleotide binding;protein binding;RNA binding	Pf00118	7203	ENSG00000163468.14	CCT3	1				0	51.2	96.9	64.3	79.7	46.9	66.9	39.6	35.3	43	61.8	47.8	51.3	88.7	29.4	113.4	95.9	50.6	51.7
TRUE	High	Master Protein	P43490	Nicotinamide phosphoribosyltransferase OS=Homo sapiens OX=9606 GN=NAMPT PE=1 SV=1	0	FALSE	179.661	71	26	486	26	1	491	55.5	7.15	9423	738.54	25	23	cell communication;metabolic process;regulation of biological process;response to stimulus	cytoplasm;cytosol;extracellular;nucleus	catalytic activity;protein binding	Pf04095	10135	ENSG00000105835.11	NAMPT	7	hsa04621; hsa01100; hsa00760	NOD-like receptor signaling pathway; Metabolic pathways; Nicotinate and nicotinamide metabolism	NAD metabolism, sirtuins and aging; Adipogenesis; NAD+ metabolism; NAD+ biosynthetic pathways	0	230.4	220.4	56.8	157.8	184.5	153.4	55.7	53.9	156.6	109.3	116.1	91.5	84.6	123.1	140.1	80.4	49.7	61.5
TRUE	High	Master Protein	P09972	Fructose-bisphosphate aldolase C OS=Homo sapiens OX=9606 GN=ALDOC PE=1 SV=2	0	FALSE	179.533	70	22	524	19	1	364	39.4	6.87	13465	1024.71	22	18	cell differentiation;metabolic process;transport	cytoskeleton;cytosol;extracellular;mitochondrion;organelle lumen	catalytic activity;protein binding	Pf00274	230	ENSG00000109107.13	ALDOC	17	hsa01230; hsa00051; hsa01100; hsa00030; hsa00010; hsa01200	Biosynthesis of amino acids; Fructose and mannose metabolism; Metabolic pathways; Pentose phosphate pathway; Glycolysis / Gluconeogenesis; Carbon metabolism	Glycolysis and Gluconeogenesis	0	100.6	65	50	69.7	97.3	48.2	74.4	207.7	54	114.2	98.7	61.1	125.7	14.9	103.1	190.2	176.2	70.3
TRUE	High	Master Protein	P62258	14-3-3 protein epsilon OS=Homo sapiens OX=9606 GN=YWHAE PE=1 SV=1	0	FALSE	178.439	70	21	1029	18	1	255	29.2	4.74	21059	1629.89	20	19	cell organization and biogenesis;cellular component movement;cellular homeostasis;metabolic process;regulation of biological process;response to stimulus;transport	cytoplasm;cytosol;membrane;mitochondrion;nucleus	protein binding;RNA binding	Pf00244	7531	ENSG00000108953.16; ENSG00000274474.3	YWHAE	17; CHR_HSCHR17_2_CTG2	hsa04110; hsa04722; hsa04151; hsa04390; hsa05203; hsa04114; hsa05169	Cell cycle; Neurotrophin signaling pathway; PI3K-Akt signaling pathway; Hippo signaling pathway; Viral carcinogenesis; Oocyte meiosis; Epstein-Barr virus infection	Sudden Infant Death Syndrome (SIDS) Susceptibility Pathways; Myometrial Relaxation and Contraction Pathways; VEGFA-VEGFR2 Signaling Pathway; Calcium Regulation in the Cardiac Cell; Cell Cycle	0	152.8	166.6	92.9	173.4	144.9	146.2	107.6	91.5	148.9	192	85.3	66.1	73.3	52.5	127	119.4	70.2	64.7
TRUE	High	Master Protein	Q93052	Lipoma-preferred partner OS=Homo sapiens OX=9606 GN=LPP PE=1 SV=1	0	FALSE	178.318	64	24	220	24	1	612	65.7	7.37	3322	402.5	23	20		cytoplasm;cytosol;membrane;nucleus	metal ion binding;protein binding	Pf00412, Pf02318, Pf03154	4026	ENSG00000145012.13	LPP	3				0	178.1	210.1	103.8	155.4	70.1	147.1	85.5	125.7	167.2	127.8	101.6	106.9	382.9	117.5	49.2	141	50.3	54.7
TRUE	High	Master Protein	P01876	Immunoglobulin heavy constant alpha 1 OS=Homo sapiens OX=9606 GN=IGHA1 PE=1 SV=2	0	FALSE	178.308	68	16	949	8	1	353	37.6	6.51	19322	1849.88	16	15	cell organization and biogenesis;cellular component movement;defense response;metabolic process;regulation of biological process;response to stimulus;transport	extracellular;membrane	protein binding	Pf07654, Pf08205	3493	ENSG00000211895.4; ENSG00000282633.1	IGHA1	14; CHR_HSCHR14_3_CTG1			Inflammatory Response Pathway	9	55.5	33.4	99.6	25.5	47.3	54.1	58.4	94.3	113.1	31.2	117.3	136.7	115.8	497.8	75.4	19.1	39.5	243
TRUE	High	Master Protein	Q01995	Transgelin OS=Homo sapiens OX=9606 GN=TAGLN PE=1 SV=4	0	FALSE	178.241	84	23	1095	23	1	201	22.6	8.84	18485	1387.96	22	22	cell differentiation	cytoplasm	protein binding	Pf00307, Pf00402	6876	ENSG00000149591.16	TAGLN	11				0	63.4	41.5	32.9	40.2	18	55.6	20.3	35.3	26.1	52.4	7.2	17.1	175.8	227.2	21.9	11	39	45.5
TRUE	High	Master Protein	Q16181	Septin-7 OS=Homo sapiens OX=9606 GN=SEPT7 PE=1 SV=2	0	FALSE	177.563	50	21	640	20	1	437	50.6	8.63	11572	1024.62	21	19	cell differentiation;cell division;cell organization and biogenesis;regulation of biological process	chromosome;cytoplasm;cytoskeleton;cytosol;membrane;nucleus	nucleotide binding;protein binding;structural molecule activity	Pf00735, Pf01926, Pf10211	989		SEPT7	7				0	223.3	146	90.5	142.7	100.7	167.1	109.4	50.4	125.9	176.7	97.8	78.4	169.7	48.2	126.1	231.2	85	101.8
TRUE	High	Master Protein	Q16658	Fascin OS=Homo sapiens OX=9606 GN=FSCN1 PE=1 SV=3	0	FALSE	177.548	56	22	783	22	1	493	54.5	7.24	16998	1107.11	22	21	cell organization and biogenesis;cell proliferation;cellular component movement;regulation of biological process	cytoplasm;cytoskeleton;cytosol	protein binding;RNA binding	Pf06268	6624	ENSG00000075618.17	FSCN1	7	hsa05206	MicroRNAs in cancer		0	70.5	89.3	141.4	144.3	101	83.6	98.8	44.3	187.8	228.3	123.8	55	84.5	45.3	79.6	75.9	52.2	57.6
TRUE	High	Master Protein	P08237	ATP-dependent 6-phosphofructokinase, muscle type OS=Homo sapiens OX=9606 GN=PFKM PE=1 SV=2	0	FALSE	177.21	44	24	320	22	1	780	85.1	7.99	6027	488.45	23	21	cell organization and biogenesis;cellular homeostasis;metabolic process;regulation of biological process	cytoplasm;cytosol;membrane;nucleus	catalytic activity;metal ion binding;nucleotide binding;protein binding	Pf00365	5213	ENSG00000152556.15	PFKM	12	hsa00010; hsa00051; hsa05230; hsa01230; hsa04152; hsa00052; hsa01100; hsa03018; hsa00030; hsa01200	Glycolysis / Gluconeogenesis; Fructose and mannose metabolism; Central carbon metabolism in cancer; Biosynthesis of amino acids; AMPK signaling pathway; Galactose metabolism; Metabolic pathways; RNA degradation; Pentose phosphate pathway; Carbon metabolism	Glycolysis and Gluconeogenesis; Insulin Signaling	0	116.9	141.3	50.5	157.9	151.7	108.2	62.1	58.3	98.1	116	84.5	92.6	53.5	12.9	72.2	93.1	46.3	59.5
TRUE	High	Master Protein	P12429	Annexin A3 OS=Homo sapiens OX=9606 GN=ANXA3 PE=1 SV=3	0	FALSE	176.529	69	25	508	25	1	323	36.4	5.92	10005	742.56	24	23	defense response;regulation of biological process;response to stimulus;transport	cytoplasm;cytosol;membrane	enzyme regulator activity;metal ion binding;protein binding	Pf00191	306	ENSG00000138772.12	ANXA3	4			Prostaglandin Synthesis and Regulation	0	48.8	111.5	20.1	87.8	369.4	67.5	35.4	72.8	27.1	174.1	53.1	168.4	73.8	51.1	136.4	14	84.2	110.9
TRUE	High	Master Protein	P28331	NADH-ubiquinone oxidoreductase 75 kDa subunit, mitochondrial OS=Homo sapiens OX=9606 GN=NDUFS1 PE=1 SV=3	0	FALSE	175.835	52	27	354	27	1	727	79.4	6.23	5895	573.6	27	24	cell organization and biogenesis;metabolic process;transport	membrane;mitochondrion;organelle lumen	catalytic activity;metal ion binding;protein binding	Pf00111, Pf00384, Pf09326, Pf10588, Pf13510	4719	ENSG00000283447.1; ENSG00000023228.13	NDUFS1	2; CHR_HSCHR2_6_CTG7_2	hsa01100; hsa05010; hsa00190; hsa05016; hsa04932; hsa05012	Metabolic pathways; Alzheimer's disease; Oxidative phosphorylation; Huntington's disease; Non-alcoholic fatty liver disease (NAFLD); Parkinson's disease	Oxidative phosphorylation; Electron Transport Chain	0	160.2	130.5	47.6	138.1	54.6	91.1	45.8	43.2	49.6	83.2	71.1	71.2	64.8	68	139.4	155.7	184.8	32.2
TRUE	High	Master Protein	Q9Y2J2	Band 4.1-like protein 3 OS=Homo sapiens OX=9606 GN=EPB41L3 PE=1 SV=2	0	FALSE	175.668	30	26	271	7	1	1087	120.6	5.19	4303	412.94	26	19	cell death;cell organization and biogenesis;regulation of biological process	cytoplasm;cytoskeleton;cytosol;membrane	protein binding;structural molecule activity	Pf00373, Pf04382, Pf05902, Pf08736, Pf09379, Pf09380	23136	ENSG00000082397.17	EPB41L3	18	hsa04530	Tight junction		15	91.2	43	54.9	166.4	69.3	140.2	83.9	73.3	121	147.3	75.3	60.7	28.2	16.3	23.1	122.7	17.1	30.8
TRUE	High	Master Protein	P14543	Nidogen-1 OS=Homo sapiens OX=9606 GN=NID1 PE=1 SV=3	0	FALSE	175.49	31	29	271	28	1	1247	136.3	5.29	4155	434.72	28	27	cell organization and biogenesis;regulation of biological process	cell surface;extracellular;membrane	metal ion binding;protein binding	Pf00008, Pf00058, Pf00086, Pf06119, Pf06247, Pf07474, Pf07645, Pf12662, Pf12947, Pf14670	4811	ENSG00000116962.14	NID1	1				0	180.6	35.2	364.3	60.6	45.5	68.8	116.8	113.4	65.1	36	67.4	48.6	109.4	62.6	64.9	69.3	60.2	57.1
TRUE	High	Master Protein	Q86VB7	Scavenger receptor cysteine-rich type 1 protein M130 OS=Homo sapiens OX=9606 GN=CD163 PE=1 SV=2	0	FALSE	175.392	27	22	247	22	1	1156	125.4	5.95	4844	439.12	21	20	defense response;response to stimulus;transport	extracellular;membrane	protein binding;receptor activity	Pf00530	9332	ENSG00000177575.12	CD163	12				0	200.8	53.5	49.8	556.3	93.4	200.5	87.3	56.2	82.7	316.5	85	67.5	35.4	71.1	30.6	137.2	86.4	21.9
TRUE	High	Master Protein	Q96QK1	Vacuolar protein sorting-associated protein 35 OS=Homo sapiens OX=9606 GN=VPS35 PE=1 SV=2	0	FALSE	175.144	46	29	421	29	1	796	91.6	5.49	8236	628.7	29	24	cell organization and biogenesis;regulation of biological process;response to stimulus;transport	cytoplasm;cytosol;endosome;membrane;mitochondrion;vacuole	protein binding;transporter activity	Pf03635	55737	ENSG00000069329.16	VPS35	16	hsa04144	Endocytosis		0	86	120.6	69	145.8	63.3	59.2	58.5	69.8	95.9	85.1	79	78.2	55.6	26.6	80.1	115.6	92.6	36.7
TRUE	High	Master Protein	P04899	Guanine nucleotide-binding protein G(i) subunit alpha-2 OS=Homo sapiens OX=9606 GN=GNAI2 PE=1 SV=3	0	FALSE	175.084	65	20	928	13	1	355	40.4	5.54	20224	1457.44	20	18	cell division;cell proliferation;metabolic process;regulation of biological process;response to stimulus	cytoplasm;cytoskeleton;cytosol;membrane;nucleus	catalytic activity;metal ion binding;nucleotide binding;protein binding;signal transducer activity	Pf00025, Pf00503	2771	ENSG00000114353.16	GNAI2	3	hsa05012; hsa04726; hsa04024; hsa04540; hsa04727; hsa04921; hsa04723; hsa04724; hsa04725; hsa04728; hsa05145; hsa04062; hsa05032; hsa04071; hsa04015; hsa04915; hsa04261; hsa04670; hsa04022; hsa04360; hsa05200; hsa04730; hsa04530; hsa05034; hsa04713; hsa04611; hsa05142; hsa04916; hsa04971; hsa04914; hsa04923; hsa05133; hsa05030; hsa04924	Parkinson's disease; Serotonergic synapse; cAMP signaling pathway; Gap junction; GABAergic synapse; Oxytocin signaling pathway; Retrograde endocannabinoid signaling; Glutamatergic synapse; Cholinergic synapse; Dopaminergic synapse; Toxoplasmosis; Chemokine signaling pathway; Morphine addiction; Sphingolipid signaling pathway; Rap1 signaling pathway; Estrogen signaling pathway; Adrenergic signalin…	Corticotropin-releasing hormone signaling pathway; Calcium Regulation in the Cardiac Cell; Signal Transduction of S1P Receptor; Chemokine signaling pathway; Human Thyroid Stimulating Hormone (TSH) signaling pathway; G Protein Signaling Pathways	6	68.5	64.7	56	121.6	58.3	61	49.9	53.9	102.1	80	73.4	136.6	111.5	70.4	91.7	145.3	47.9	97.7
TRUE	High	Master Protein	O43390	Heterogeneous nuclear ribonucleoprotein R OS=Homo sapiens OX=9606 GN=HNRNPR PE=1 SV=1	0	FALSE	175.031	43	25	581	18	1	633	70.9	8.13	9965	697.75	25	22	metabolic process;regulation of biological process	cytoplasm;endoplasmic reticulum;nucleus;spliceosomal complex	protein binding;RNA binding	Pf00076, Pf13893, Pf14259	10236	ENSG00000282958.1; ENSG00000125944.18	HNRNPR	1; CHR_HSCHR1_4_CTG3			mRNA Processing	0	148.9	166.2	72.4	169.4	104.7	101.3	74.2	65	100.8	116.8	102.3	79	82.1	71.4	92.9	180.1	341	79
TRUE	High	Master Protein	P01859	Immunoglobulin heavy constant gamma 2 OS=Homo sapiens OX=9606 GN=IGHG2 PE=1 SV=2	0	FALSE	174.865	58	15	1378	7	1	326	35.9	7.59	20770	2120.57	15	14	cell organization and biogenesis;defense response;metabolic process;regulation of biological process;response to stimulus	extracellular;membrane	catalytic activity;protein binding	Pf07654, Pf08205	3501	ENSG00000211893.3; ENSG00000274497.2	IGHG2	14; CHR_HSCHR14_3_CTG1				1	83.5	49.2	113	92.7	63.8	61.9	123.4	132.9	55	54.2	104	91.9	81.7	191.4	36.9	130	57.2	280.4
TRUE	High	Master Protein	Q14624	Inter-alpha-trypsin inhibitor heavy chain H4 OS=Homo sapiens OX=9606 GN=ITIH4 PE=1 SV=4	0	FALSE	174.656	40	30	247	30	1	930	103.3	6.98	5116	332.97	30	21	defense response;metabolic process;regulation of biological process;response to stimulus;transport	cytoplasm;extracellular;membrane;organelle lumen	enzyme regulator activity;protein binding	Pf00092, Pf06668, Pf08487, Pf10138, Pf13444, Pf13519, Pf13768	3700	ENSG00000055955.15	ITIH4	3				0	24.1	28.4	103.2	30.5	42	29	20.9	45.8	37.1	49.3	53.4	87.5	103.6	409.4	78.8	41.8	51.1	183.2
TRUE	High	Master Protein	P17661	Desmin OS=Homo sapiens OX=9606 GN=DES PE=1 SV=3	0	FALSE	174.361	49	26	1047	20	1	470	53.5	5.27	17202	1568.27	24	22	cell organization and biogenesis;cellular component movement;regulation of biological process	cytoplasm;cytoskeleton;cytosol;membrane;nucleus	protein binding;structural molecule activity	Pf00038, Pf03962, Pf04732	1674	ENSG00000175084.11	DES	2	hsa05412; hsa05414; hsa05410	Arrhythmogenic right ventricular cardiomyopathy (ARVC); Dilated cardiomyopathy; Hypertrophic cardiomyopathy (HCM)	Striated Muscle Contraction; Arrhythmogenic Right Ventricular Cardiomyopathy	0	57.9	83.7	52.6	43.1	16.6	161.9	22.7	69.4	34	32.1	31.6	14.6	132.2	43.5	27.6	41.2	97.8	22.9
TRUE	High	Master Protein	O15061	Synemin OS=Homo sapiens OX=9606 GN=SYNM PE=1 SV=2	0	FALSE	174.295	27	35	180	35	1	1565	172.7	5.16	3161	240.12	33	32	cell organization and biogenesis	cytoplasm;cytoskeleton;membrane	protein binding;structural molecule activity	Pf00038	23336		SYNM	15				0	54.8	26.9	106	64	281.4	148.8	101.8	39.9	201.8	53.2	62.1	40.8	50	20.3	54.4	37.1	110.8	86.2
TRUE	High	Master Protein	P35527	Keratin, type I cytoskeletal 9 OS=Homo sapiens OX=9606 GN=KRT9 PE=1 SV=3	0	FALSE	173.912	61	24	262	24	1	623	62	5.24	5751	416.36	23	20	cell death;cell organization and biogenesis	cytosol;membrane;nucleus	structural molecule activity	Pf00038, Pf13166	3857	ENSG00000171403.9	KRT9	17				0	74.5	75.5	204.7	98	59.9	109.2	54.6	91.1	108.4	115.3	67.8	18.9	28.4	27.3	93.8	61.9	32.6	60.4
TRUE	High	Master Protein	P63244	Receptor of activated protein C kinase 1 OS=Homo sapiens OX=9606 GN=RACK1 PE=1 SV=3	0	FALSE	173.606	88	20	651	20	1	317	35.1	7.69	13440	1031.26	19	17	cell death;cellular homeostasis;development;metabolic process;regulation of biological process;response to stimulus	cytoplasm;cytosol;membrane;mitochondrion;nucleus;ribosome	enzyme regulator activity;protein binding;RNA binding;structural molecule activity	Pf00400	10399	ENSG00000204628.11	GNB2L1; RACK1	5	hsa05162	Measles	Androgen receptor signaling pathway; VEGFA-VEGFR2 Signaling Pathway; Interferon type I signaling pathways; Brain-Derived Neurotrophic Factor (BDNF) signaling pathway	0	140.1	138.1	109.5	195.1	53.1	156.9	62.2	55.3	75.1	124.5	76.6	94.9	116.7	75.2	145.5	138.7	61.1	50.4
TRUE	High	Master Protein	P01871	Immunoglobulin heavy constant mu OS=Homo sapiens OX=9606 GN=IGHM PE=1 SV=4	0	FALSE	173.137	55	23	815	7	1	453	49.4	6.77	15381	1119.44	23	22	cell organization and biogenesis;cellular component movement;defense response;metabolic process;regulation of biological process;response to stimulus	cell surface;extracellular;membrane	DNA binding;protein binding	Pf00047, Pf07654, Pf08205	3507	ENSG00000282657.3; ENSG00000211899.9	IGHM	CHR_HSCHR14_3_CTG1; 14				16	40.2	97.5	75.7	16.1	51.2	17.7	43.6	84.5	23	21.4	102.6	207.9	74.1	166.9	54.3	50.8	83.2	214.3
TRUE	High	Master Protein	P10909	Clusterin OS=Homo sapiens OX=9606 GN=CLU PE=1 SV=1	0	FALSE	173.131	38	20	779	20	1	449	52.5	6.27	16924	1209.89	20	17	cell death;cell organization and biogenesis;cell proliferation;defense response;metabolic process;regulation of biological process;response to stimulus;transport	cell surface;cytoplasm;cytosol;endoplasmic reticulum;extracellular;Golgi;membrane;mitochondrion;nucleus;organelle lumen	catalytic activity;protein binding	Pf01093	1191	ENSG00000120885.21	CLU	8	hsa04610	Complement and coagulation cascades	Complement and Coagulation Cascades	0	50	52.8	120.9	42.1	77.2	131.9	65.4	57.7	42.2	77.1	81.4	18.4	112.2	240.2	77	32.9	194.2	197.6
TRUE	High	Master Protein	Q9HBL0	Tensin-1 OS=Homo sapiens OX=9606 GN=TNS1 PE=1 SV=2	0	FALSE	173.093	29	31	161	7	1	1735	185.6	7.75	2526	223.19	30	24	cell organization and biogenesis;cellular component movement	cell surface;cytoplasm;cytoskeleton	protein binding;RNA binding	Pf00017, Pf08416, Pf10409	7145	ENSG00000079308.16	TNS1	2			Integrin-mediated Cell Adhesion	19	197.7	79.3	70.6	127.1	86.4	146.6	126.6	185.4	66	135.1	71.8	40.8	66.6	48.5	42	173.8	99.7	46.2
TRUE	High	Master Protein	E5RK69	Annexin OS=Homo sapiens OX=9606 GN=ANXA6 PE=1 SV=1	0	FALSE	172.95	63	29	652	7	1	460	51.7	6.05		2252.91		29			metal ion binding	Pf00191		ENSG00000197043.13		5				0	104.4	237.6	117.9	263.9	88	189.1	79.1	79.5	150.2	110.7	163.3	144.5	36	15.8	150.7	103.1	48.7	43.2
TRUE	High	Master Protein	P22695	Cytochrome b-c1 complex subunit 2, mitochondrial OS=Homo sapiens OX=9606 GN=UQCRC2 PE=1 SV=3	0	FALSE	172.939	60	18	443	18	1	453	48.4	8.63	8710	698.42	18	17	metabolic process;transport	membrane;mitochondrion	catalytic activity;metal ion binding;protein binding	Pf00675, Pf05193	7385	ENSG00000140740.10; ENSG00000284493.1	UQCRC2	16; CHR_HG926_PATCH	hsa01100; hsa05012; hsa00190; hsa04260; hsa04932; hsa05010; hsa05016	Metabolic pathways; Parkinson's disease; Oxidative phosphorylation; Cardiac muscle contraction; Non-alcoholic fatty liver disease (NAFLD); Alzheimer's disease; Huntington's disease	Electron Transport Chain	0	192.3	168.9	70.9	159.3	70.2	129.9	82.7	66.4	62.5	83.1	76.1	96.8	120.4	49.6	117	145.2	120.5	87.1
TRUE	High	Master Protein	Q5TCU3	Tropomyosin beta chain OS=Homo sapiens OX=9606 GN=TPM2 PE=1 SV=1	0	FALSE	172.648	71	31	572	5	1	284	32.8	4.68		1923.66		31	cell organization and biogenesis;cellular component movement;regulation of biological process	cytoskeleton;cytosol	protein binding;structural molecule activity	Pf00261, Pf12718	7169	ENSG00000198467.13	TPM2	9			Striated Muscle Contraction	0	29.2	10.8	25.4	32.6	12.1	43.6	62.2	113.2	22.4	37.5	17.6	19.1	187	186.6	10	33.3	59.7	49.8
TRUE	High	Master Protein	P09104	Gamma-enolase OS=Homo sapiens OX=9606 GN=ENO2 PE=1 SV=3	0	FALSE	172.632	64	19	1916	15	1	434	47.2	5.03	51054	2844.44	17	19	metabolic process	cytoplasm;cytosol;membrane	catalytic activity;metal ion binding;protein binding	Pf00113, Pf03952, Pf13378	2026	ENSG00000111674.8	ENO2	12	hsa03018; hsa04066; hsa01100; hsa00010; hsa01230; hsa01200	RNA degradation; HIF-1 signaling pathway; Metabolic pathways; Glycolysis / Gluconeogenesis; Biosynthesis of amino acids; Carbon metabolism	Glycolysis and Gluconeogenesis	0	100.9	134.4	48.4	51.5	206.2	72.4	182.8	212.8	24.8	66.7	193.2	128.9	97.3	15.2	209.3	186.9	28.2	61.1
TRUE	High	Master Protein	P40763	Signal transducer and activator of transcription 3 OS=Homo sapiens OX=9606 GN=STAT3 PE=1 SV=2	0	FALSE	172.53	44	23	270	22	1	770	88	6.3	4920	426.97	22	21	cell differentiation;cell organization and biogenesis;cell proliferation;cellular component movement;defense response;metabolic process;regulation of biological process;reproduction;response to stimulus;transport	cytoplasm;cytosol;membrane;mitochondrion;nucleus	DNA binding;protein binding;signal transducer activity	Pf00017, Pf01017, Pf02864, Pf02865	6774	ENSG00000168610.14	STAT3	17	hsa05205; hsa04933; hsa04917; hsa05161; hsa04062; hsa05145; hsa05221; hsa05212; hsa04931; hsa05203; hsa05162; hsa05206; hsa04630; hsa04068; hsa04920; hsa01521; hsa04066; hsa04550; hsa05200; hsa05321; hsa05160; hsa05169	Proteoglycans in cancer; AGE-RAGE signaling pathway in diabetic complications; Prolactin signaling pathway; Hepatitis B; Chemokine signaling pathway; Toxoplasmosis; Acute myeloid leukemia; Pancreatic cancer; Insulin resistance; Viral carcinogenesis; Measles; MicroRNAs in cancer; Jak-STAT signaling pathway; FoxO signaling pathway; Adipocytokine signaling pathway; EGFR tyrosine kinase inhibitor res…	Human Thyroid Stimulating Hormone (TSH) signaling pathway; IL-5 Signaling Pathway; MicroRNAs in cardiomyocyte hypertrophy; IL-2 Signaling Pathway; Serotonin Receptor 2 and STAT3 Signaling; Leptin Insulin Overlap; EPO Receptor Signaling; Chemokine signaling pathway; VEGFA-VEGFR2 Signaling Pathway; EGF/EGFR Signaling Pathway; Hepatitis C and Hepatocellular Carcinoma; Brain-Derived Neurotrophic Fact…	1	115.7	91.6	75	105.5	43	72.7	23.3	57.1	41.2	53.3	48.2	73.2	796.6	20.8	144.8	88.7	35.7	326.2
TRUE	High	Master Protein	P02766	Transthyretin OS=Homo sapiens OX=9606 GN=TTR PE=1 SV=1	0	FALSE	172.264	69	12	463	12	1	147	15.9	5.76	11175	783.24	12	12	cell organization and biogenesis;metabolic process;regulation of biological process;transport	cytoplasm;extracellular;organelle lumen	protein binding	Pf00576	7276	ENSG00000118271.9	TTR	18	hsa04918	Thyroid hormone synthesis		0	28.7	46.9	51.3	128.7	102.1	137.6	242.9	104.7	83.5	114.2	170.4	63.2	117.8	406.7	20.3	47.2	43.9	168.2
TRUE	High	Master Protein	P11940	Polyadenylate-binding protein 1 OS=Homo sapiens OX=9606 GN=PABPC1 PE=1 SV=2	0	FALSE	171.836	49	27	569	17	1	636	70.6	9.5	10514	805.91	26	25	metabolic process;regulation of biological process	cytoplasm;cytosol;membrane;nucleus;spliceosomal complex	protein binding;RNA binding;translation regulator activity	Pf00076, Pf00658, Pf13893, Pf14259	26986	ENSG00000070756.15	PABPC1	8	hsa03015; hsa03018; hsa03013	mRNA surveillance pathway; RNA degradation; RNA transport	Translation Factors; Endoderm Differentiation	10	180.6	176.4	99.9	199.9	95.3	161.9	94.5	67.2	124.5	185.6	122.1	93.3	57.7	46.6	120.7	125.4	72.8	56.9
TRUE	High	Master Protein	P31930	Cytochrome b-c1 complex subunit 1, mitochondrial OS=Homo sapiens OX=9606 GN=UQCRC1 PE=1 SV=3	0	FALSE	171.824	47	17	454	17	1	480	52.6	6.37	9653	769.13	17	16	metabolic process;response to stimulus;transport	cytosol;membrane;mitochondrion	catalytic activity;metal ion binding;protein binding;transporter activity	Pf00675, Pf05193, Pf08367	7384	ENSG00000010256.10	UQCRC1	3	hsa05010; hsa01100; hsa05016; hsa00190; hsa05012; hsa04260; hsa04932	Alzheimer's disease; Metabolic pathways; Huntington's disease; Oxidative phosphorylation; Parkinson's disease; Cardiac muscle contraction; Non-alcoholic fatty liver disease (NAFLD)	Electron Transport Chain	0	201.8	181.1	64.6	155.7	107.2	164.1	84.3	104.3	69.6	103.3	96.9	74.8	78.3	33.1	130	187.6	105.8	55.2
TRUE	High	Master Protein	Q9NRN5	Olfactomedin-like protein 3 OS=Homo sapiens OX=9606 GN=OLFML3 PE=2 SV=1	0	FALSE	171.675	62	23	497	23	1	406	46	6.57	11033	772.2	23	21	development	extracellular		Pf02191	56944	ENSG00000116774.11	OLFML3	1				0	59.7	31.1	182.4	28	24.3	20.8	10.7	9.6	21.7	67.7	23	44.2	262.5	262.3	88.9	43.6	121.1	103.4
TRUE	High	Master Protein	O60506	Heterogeneous nuclear ribonucleoprotein Q OS=Homo sapiens OX=9606 GN=SYNCRIP PE=1 SV=2	0	FALSE	171.522	51	26	619	19	1	623	69.6	8.59	11087	806.74	25	23	cell differentiation;metabolic process;regulation of biological process;response to stimulus	cytoplasm;endoplasmic reticulum;membrane;nucleus;spliceosomal complex	protein binding;RNA binding	Pf00076, Pf13893, Pf14259	10492	ENSG00000135316.17	SYNCRIP	6				7	110.7	128.2	87.9	139	127.1	113	108.1	95.2	105.7	153.4	121.1	75.6	89.8	65.1	118.3	161.6	121.2	54.9
TRUE	High	Master Protein	P11413	Glucose-6-phosphate 1-dehydrogenase OS=Homo sapiens OX=9606 GN=G6PD PE=1 SV=4	0	FALSE	171.24	67	26	435	26	1	515	59.2	6.84	6800	421.1	26	23	metabolic process;regulation of biological process;response to stimulus	cytoplasm;cytosol;membrane;nucleus	catalytic activity;nucleotide binding;protein binding	Pf00479, Pf02781	2539	ENSG00000160211.15	G6PD	X	hsa01200; hsa01100; hsa00480; hsa05230; hsa00030	Carbon metabolism; Metabolic pathways; Glutathione metabolism; Central carbon metabolism in cancer; Pentose phosphate pathway	NRF2 pathway; Sulfation Biotransformation Reaction; Glutathione metabolism; ATM Signaling Network in Development and Disease; Cori Cycle; Pentose Phosphate Pathway	0	45.7	73.8	81.3	104.7	70.3	229.1	91.3	64.3	42.4	66.2	55.8	112.7	89.9	23.2	357.7	54.3	100.4	37.6
TRUE	High	Master Protein	P11586	C-1-tetrahydrofolate synthase, cytoplasmic OS=Homo sapiens OX=9606 GN=MTHFD1 PE=1 SV=3	0	FALSE	170.383	48	31	457	31	1	935	101.5	7.3	8009	729.57	30	28	metabolic process	cytoplasm;cytosol;membrane;mitochondrion	catalytic activity;nucleotide binding;protein binding	Pf00763, Pf01268, Pf02882	4522		MTHFD1	14	hsa00670; hsa01100	One carbon pool by folate; Metabolic pathways	One Carbon Metabolism; Trans-sulfuration and one carbon metabolism; Folate Metabolism	0	151.1	148.5	77.8	189.2	75.8	91.7	32.5	38.4	126.8	151	127.4	66.9	70.7	40.2	104.7	134.9	92.5	61.6
TRUE	High	Master Protein	O94973	AP-2 complex subunit alpha-2 OS=Homo sapiens OX=9606 GN=AP2A2 PE=1 SV=2	0	FALSE	169.582	43	27	462	9	1	939	103.9	6.96	7890	664.7	27	24	cell organization and biogenesis;cellular component movement;metabolic process;regulation of biological process;response to stimulus;transport	cytosol;membrane	protein binding;transporter activity	Pf01602, Pf02296, Pf02883, Pf13646	161	ENSG00000183020.13	AP2A2	11	hsa04721; hsa05016; hsa04961; hsa04144	Synaptic vesicle cycle; Huntington's disease; Endocrine and other factor-regulated calcium reabsorption; Endocytosis	Synaptic Vesicle Pathway	10	231.3	316.3	117.8	175.3	42.4	179.5	80.3	62.3	83.5	121.2	110.6	72.6	73.2	26.2	80.4	129.7	103.5	40.2
TRUE	High	Master Protein	Q15181	Inorganic pyrophosphatase OS=Homo sapiens OX=9606 GN=PPA1 PE=1 SV=2	0	FALSE	169.554	81	23	346	22	1	289	32.6	5.86	6665	545.02	23	18	metabolic process	cytoplasm;cytosol	catalytic activity;metal ion binding	Pf00719	5464	ENSG00000180817.11	PPA1	10	hsa00190	Oxidative phosphorylation		1	201.6	121.9	103.6	275.8	109.8	115	72.7	57.4	324.1	117.4	131.3	112	51	31.6	104.3	112.8	89.2	37.1
TRUE	High	Master Protein	P30043	Flavin reductase (NADPH) OS=Homo sapiens OX=9606 GN=BLVRB PE=1 SV=3	0	FALSE	168.685	83	13	568	13	1	206	22.1	7.65	15411	1094.88	13	12	metabolic process;transport	cytoplasm;cytosol;membrane	catalytic activity	Pf01073, Pf01370, Pf02254, Pf13460	645	ENSG00000090013.9	BLVRB	19	hsa00860; hsa00740	Porphyrin and chlorophyll metabolism; Riboflavin metabolism	NRF2 pathway	0	154.9	105.6	128.6	110.2	101.6	129.6	83.4	85.2	53.8	104.5	102.2	78.3	54.9	59.1	104.7	58.7	204.4	95.1
TRUE	High	Master Protein	Q9NVA2	Septin-11 OS=Homo sapiens OX=9606 GN=SEPT11 PE=1 SV=3	0	FALSE	168.383	59	25	415	13	1	429	49.4	6.81	7225	598.61	23	25	cell division;cell organization and biogenesis	cytoplasm;cytoskeleton	nucleotide binding;protein binding	Pf00735	55752	ENSG00000138758.11	SEPT11	4	hsa05100	Bacterial invasion of epithelial cells		11	115.2	108.2	83.3	143.1	66.8	130.4	87.9	67.3	109.1	133.9	60.7	43.7	110.6	57.4	103.2	260.9	29.5	72.2
TRUE	High	Master Protein	Q1KMD3	Heterogeneous nuclear ribonucleoprotein U-like protein 2 OS=Homo sapiens OX=9606 GN=HNRNPUL2 PE=1 SV=1	0	FALSE	168.03	37	27	358	27	1	747	85.1	4.91	6709	501.61	25	27		membrane;nucleus	protein binding;RNA binding	Pf00622, Pf02037, Pf08433, Pf13671	221092	ENSG00000214753.2	HNRNPUL2	11				0	182.6	142.8	78.7	173.5	88.7	136.2	81.3	60.2	97.2	157.3	118.5	149.6	86.1	33.6	126.2	169.1	64.7	56.3
TRUE	High	Master Protein	P48735	Isocitrate dehydrogenase [NADP], mitochondrial OS=Homo sapiens OX=9606 GN=IDH2 PE=1 SV=2	0	FALSE	167.425	51	26	353	25	1	452	50.9	8.69	6099	432.55	25	18	cell organization and biogenesis;metabolic process;regulation of biological process	cytosol;membrane;mitochondrion;organelle lumen	catalytic activity;metal ion binding;nucleotide binding	Pf00180	3418	ENSG00000182054.9	IDH2	15	hsa01210; hsa04146; hsa00480; hsa00020; hsa01100; hsa01230; hsa01200	2-Oxocarboxylic acid metabolism; Peroxisome; Glutathione metabolism; Citrate cycle (TCA cycle); Metabolic pathways; Biosynthesis of amino acids; Carbon metabolism	TCA Cycle	1	69.8	62.1	45.5	112.6	141.7	58.8	71.5	50.9	52.1	86.6	49.6	76.2	47.6	36.7	45.1	163.2	50.4	48
TRUE	High	Master Protein	O00429	Dynamin-1-like protein OS=Homo sapiens OX=9606 GN=DNM1L PE=1 SV=2	0	FALSE	166.961	51	25	280	5	1	736	81.8	6.81	6342	371.69	25	23	cell death;cell organization and biogenesis;regulation of biological process;response to stimulus;transport	cytoplasm;cytoskeleton;cytosol;endoplasmic reticulum;Golgi;membrane;mitochondrion	catalytic activity;enzyme regulator activity;nucleotide binding;protein binding	Pf00350, Pf01031, Pf02212	10059	ENSG00000087470.17	DNM1L	12	hsa04668; hsa04621	TNF signaling pathway; NOD-like receptor signaling pathway	Synaptic Vesicle Pathway	20	57.2	64.2	36.9	56.6	30.5	56.7	44.8	44.8	43.1	25.5	36.1	41.3	21.6	8.6	66.7	94	18.7	20.6
TRUE	High	Master Protein	P35606	Coatomer subunit beta' OS=Homo sapiens OX=9606 GN=COPB2 PE=1 SV=2	0	FALSE	166.058	41	26	366	26	1	906	102.4	5.27	6076	568.98	26	25	transport	cytoplasm;cytosol;Golgi;membrane	protein binding;structural molecule activity	Pf00400, Pf04053	9276	ENSG00000184432.9	COPB2	3				0	74.3	159	165.2	143.9	168.1	83.8	137.5	167.3	358.7	72.7	277.1	57.8	41.9	32	85.3	89.3	148.1	26.1
TRUE	High	Master Protein	Q99536	Synaptic vesicle membrane protein VAT-1 homolog OS=Homo sapiens OX=9606 GN=VAT1 PE=1 SV=2	0	FALSE	166.007	68	19	362	19	1	393	41.9	6.29	8307	617.49	18	17	metabolic process;regulation of biological process;transport	cytoplasm;extracellular;membrane;mitochondrion;organelle lumen	catalytic activity;metal ion binding	Pf00107, Pf08240, Pf13602	10493	ENSG00000108828.15	VAT1	17				0	159.7	143.6	56.3	149.6	86.4	142.2	83.9	69	180.7	167	112.4	140.3	168.6	46.6	118.8	55.4	33	105.7
TRUE	High	Master Protein	Q92841	Probable ATP-dependent RNA helicase DDX17 OS=Homo sapiens OX=9606 GN=DDX17 PE=1 SV=2	0	FALSE	165.994	48	31	502	24	1	729	80.2	8.27	8237	609.37	29	30	cell differentiation;cell organization and biogenesis;defense response;metabolic process;regulation of biological process;response to stimulus	cytoplasm;cytosol;membrane;nucleus	catalytic activity;nucleotide binding;protein binding;RNA binding	Pf00270, Pf00271	10521	ENSG00000100201.20	DDX17	22			RIG-I-like Receptor Signaling	7	101.9	116.6	38.6	121.5	56.1	73.1	49.2	43.9	77.4	101.1	67.7	45.6	60.5	957	80.9	97.3	124.1	30.8
TRUE	High	Master Protein	O60701	UDP-glucose 6-dehydrogenase OS=Homo sapiens OX=9606 GN=UGDH PE=1 SV=1	0	FALSE	165.841	67	24	319	24	1	494	55	7.12	6708	460.45	23	21	metabolic process	cytosol;nucleus	catalytic activity;nucleotide binding	Pf00984, Pf03720, Pf03721	7358	ENSG00000109814.11	UGDH	4	hsa01100; hsa00520; hsa00040; hsa00053	Metabolic pathways; Amino sugar and nucleotide sugar metabolism; Pentose and glucuronate interconversions; Ascorbate and aldarate metabolism	Glucuronidation	0	150.8	145.3	123.9	163.5	55.6	94.2	119.9	61.8	189.7	102.3	177	142.9	75.9	96.7	67.1	161.5	81.8	37
TRUE	High	Master Protein	P05455	Lupus La protein OS=Homo sapiens OX=9606 GN=SSB PE=1 SV=2	0	FALSE	165.45	56	26	419	26	1	408	46.8	7.12	9163	595.68	24	24	metabolic process;transport	cytoplasm;nucleus	protein binding;RNA binding	Pf00076, Pf05383, Pf08777, Pf14259	6741	ENSG00000138385.15	SSB	2	hsa05322	Systemic lupus erythematosus		0	115.9	166.9	474.3	223.1	105.8	147.1	97.5	69.7	128.9	159.1	99.6	64.9	69.5	18.4	184.9	150.3	52.2	35.1
TRUE	High	Master Protein	Q7Z7G0	Target of Nesh-SH3 OS=Homo sapiens OX=9606 GN=ABI3BP PE=1 SV=1	0	FALSE	165.449	26	24	215	24	1	1075	118.6	9.44	3633	299.09	23	23	cell organization and biogenesis;regulation of biological process	extracellular	protein binding	Pf00041	25890	ENSG00000154175.16	ABI3BP	3				0	52.8	46.3	101.4	117.6	28.2	243	59.6	52.5	103.1	74.4	80.8	35.9	346	238.6	306.8	37.9	90.3	175
TRUE	High	Master Protein	Q02252	Methylmalonate-semialdehyde dehydrogenase [acylating], mitochondrial OS=Homo sapiens OX=9606 GN=ALDH6A1 PE=1 SV=2	0	FALSE	165.093	55	25	373	25	1	535	57.8	8.5	6759	531.81	25	23	cell differentiation;metabolic process	mitochondrion;organelle lumen	catalytic activity;RNA binding	Pf00171	4329	ENSG00000119711.12	ALDH6A1	14	hsa01200; hsa00562; hsa00640; hsa00280; hsa00410; hsa01100	Carbon metabolism; Inositol phosphate metabolism; Propanoate metabolism; Valine, leucine and isoleucine degradation; beta-Alanine metabolism; Metabolic pathways		0	159.4	116.7	84.7	153.6	77.1	122.4	26.7	55.6	56.1	68.7	58.9	79.4	54.4	47.9	66.7	75.4	284.8	36.7
TRUE	High	Master Protein	Q01469	Fatty acid-binding protein, epidermal OS=Homo sapiens OX=9606 GN=FABP5 PE=1 SV=3	0	FALSE	165.065	70	14	471	14	1	135	15.2	7.01	9060	816.5	14	13	metabolic process;transport	cytoplasm;cytosol;extracellular;membrane;organelle lumen	protein binding;transporter activity	Pf00061	2171	ENSG00000164687.10	FABP5	8	hsa03320	PPAR signaling pathway	PPAR signaling pathway	0	619.2	722.9	99.6	180.5	11.8	99.9	42.9	48.1	37.1	175.8	39.9	96.7	41.7	20.6	77.9	59.4	21.6	13.4
TRUE	High	Master Protein	P09543	2',3'-cyclic-nucleotide 3'-phosphodiesterase OS=Homo sapiens OX=9606 GN=CNP PE=1 SV=2	0	FALSE	165.048	48	22	302	22	1	421	47.5	9.07	5690	527.39	21	19	cell communication;cell differentiation;cell organization and biogenesis;metabolic process;response to stimulus	cytoplasm;membrane	catalytic activity;nucleotide binding;RNA binding	Pf01591, Pf05881, Pf08302, Pf13207, Pf13671	1267	ENSG00000173786.16	CNP	17			Glial Cell Differentiation; Mecp2 and Associated Rett Syndrome	0	51.5	50	45.9	47.4	219	19.8	15.6	32.9	67.7	34.3	47.4	40.4	56.2	44.3	52.1	550.2	34.6	84.6
TRUE	High	Master Protein	O75367	Core histone macro-H2A.1 OS=Homo sapiens OX=9606 GN=H2AFY PE=1 SV=4	0	FALSE	164.934	52	15	537	13	1	372	39.6	9.79	10483	918.6	15	14	cell organization and biogenesis;regulation of biological process	chromosome;nucleus	DNA binding;enzyme regulator activity;protein binding	Pf00125, Pf01661	9555	ENSG00000113648.16	H2AFY	5	hsa05034; hsa05322	Alcoholism; Systemic lupus erythematosus	H19 action Rb-E2F1 signaling and CDK-beta-catenin activity	0	176.3	327.1	93.1	220.9	48	178.8	65.5	131.8	51	141.7	79.7	65.5	90.9	26.4	158.4	108	205.3	49.1
TRUE	High	Master Protein	P11498	Pyruvate carboxylase, mitochondrial OS=Homo sapiens OX=9606 GN=PC PE=1 SV=2	0	FALSE	164.461	34	27	285	27	1	1178	129.6	6.84	4345	402.12	26	23	metabolic process;regulation of biological process	cytoplasm;cytosol;mitochondrion;organelle lumen	catalytic activity;metal ion binding;nucleotide binding;protein binding	Pf00289, Pf00364, Pf00682, Pf02222, Pf02436, Pf02785, Pf02786, Pf07478, Pf08443, Pf13533, Pf13535, Pf15632	5091	ENSG00000173599.13	PC	11	hsa01230; hsa00020; hsa00620; hsa01100; hsa01200	Biosynthesis of amino acids; Citrate cycle (TCA cycle); Pyruvate metabolism; Metabolic pathways; Carbon metabolism	Fatty Acid Biosynthesis; Amino Acid metabolism; Glycolysis and Gluconeogenesis; Alanine and aspartate metabolism; TCA Cycle and Deficiency of Pyruvate Dehydrogenase complex (PDHc)	0	64.5	142.8	76.5	84.9	69.6	123.7	107.2	54	84.6	47.4	187.8	22.9	28.3	22.7	84	109.2	122.5	35.8
TRUE	High	Master Protein	Q9Y3I0	tRNA-splicing ligase RtcB homolog OS=Homo sapiens OX=9606 GN=RTCB PE=1 SV=1	0	FALSE	164.446	50	21	334	21	1	505	55.2	7.23	5981	561.96	19	20	metabolic process	cytoplasm;cytosol;membrane;nucleus	catalytic activity;metal ion binding;nucleotide binding;protein binding;RNA binding	Pf01139	51493	ENSG00000100220.11	C22orf28; RTCB	22				0	168.9	204.5	127.5	243.7	95.3	205.5	151.8	213.6	100.2	141.6	111.5	67.4	68.1	42.2	87	68.4	37.3	49.2
TRUE	High	Master Protein	P31948	Stress-induced-phosphoprotein 1 OS=Homo sapiens OX=9606 GN=STIP1 PE=1 SV=1	0	FALSE	163.885	56	30	461	30	1	543	62.6	6.8	6849	713.76	28	26	response to stimulus	cytoplasm;cytosol;Golgi;nucleus	protein binding;RNA binding	Pf00515, Pf12895, Pf13414, Pf13424, Pf13432	10963	ENSG00000168439.16	STIP1	11	hsa05020	Prion diseases		0	118.7	150.7	64.8	150.2	101.3	83.4	88.5	89.3	105.4	193.1	55.2	82.2	81.4	45.6	118.8	61.7	50.4	36.7
TRUE	High	Master Protein	P14550	Alcohol dehydrogenase [NADP(+)] OS=Homo sapiens OX=9606 GN=AKR1A1 PE=1 SV=3	0	FALSE	163.84	78	21	462	20	1	325	36.6	6.79	8550	804.39	21	18	metabolic process	cytosol;membrane	catalytic activity;protein binding	Pf00248	10327	ENSG00000117448.13	AKR1A1	1	hsa00010; hsa01100; hsa00561; hsa00040	Glycolysis / Gluconeogenesis; Metabolic pathways; Glycerolipid metabolism; Pentose and glucuronate interconversions	Metapathway biotransformation; Benzo(a)pyrene metabolism	1	61.6	189.2	120.9	130.6	126.9	69	91.8	82	169.8	89.3	88.2	92.1	92.1	59.7	159.7	170.6	145.8	86.1
TRUE	High	Master Protein	P50990	T-complex protein 1 subunit theta OS=Homo sapiens OX=9606 GN=CCT8 PE=1 SV=4	0	FALSE	163.662	51	28	478	28	1	548	59.6	5.6	8631	656.55	27	28	cell organization and biogenesis;metabolic process;regulation of biological process;transport	cytoplasm;cytoskeleton;cytosol;extracellular;organelle lumen	catalytic activity;nucleotide binding;protein binding	Pf00118	10694	ENSG00000156261.12	CCT8	21				0	96.1	150.6	157.2	110.9	68	120.4	101.2	69.3	82.9	108.7	83.6	183.5	66	46.1	82.7	146.4	92.4	62.9
TRUE	High	Master Protein	P30086	Phosphatidylethanolamine-binding protein 1 OS=Homo sapiens OX=9606 GN=PEBP1 PE=1 SV=3	0	FALSE	163.128	86	15	937	15	1	187	21	7.53	22559	1968.51	15	14	metabolic process;regulation of biological process;response to stimulus	cytoplasm;cytosol;nucleus	enzyme regulator activity;nucleotide binding;protein binding;RNA binding	Pf01161	5037	ENSG00000089220.4	PEBP1	12			EGF/EGFR Signaling Pathway	0	118.5	148.9	88.2	162.8	228	143.1	120.9	106.7	147.9	137.3	105.8	40.2	108.3	31.6	89.8	200.5	75.8	81.1
TRUE	High	Master Protein	Q01518	Adenylyl cyclase-associated protein 1 OS=Homo sapiens OX=9606 GN=CAP1 PE=1 SV=5	0	FALSE	163.039	56	25	555	17	1	475	51.9	8.06	10926	970.29	25	21	cell organization and biogenesis;cellular component movement;regulation of biological process;response to stimulus;transport	cytoplasm;cytoskeleton;extracellular;membrane;organelle lumen	protein binding	Pf01213, Pf07986, Pf08603	10487	ENSG00000131236.16	CAP1	1			Insulin Signaling; Angiopoietin Like Protein 8 Regulatory Pathway	7	107.3	138.3	103.8	212.5	154.1	117.6	146.6	101.5	175.6	141.3	100	128.2	86.4	87.5	53.8	113.8	131.3	48.9
TRUE	High	Master Protein	Q99832	T-complex protein 1 subunit eta OS=Homo sapiens OX=9606 GN=CCT7 PE=1 SV=2	0	FALSE	162.996	61	26	431	26	1	543	59.3	7.65	9059	549.42	26	23	metabolic process;regulation of biological process;transport	cytoplasm;cytosol;mitochondrion	nucleotide binding;protein binding	Pf00118	10574	ENSG00000135624.15	CCT7	2				0	82.1	130.6	96.9	122.9	105.5	100.9	80.4	79.7	135.6	103.6	86.2	71.7	82.9	37.6	110.5	118.1	52.5	64.4
TRUE	High	Master Protein	E9PMV1	Plectin (Fragment) OS=Homo sapiens OX=9606 GN=PLEC PE=1 SV=1	0	FALSE	162.551	55	34	507	2	1	703	80.7	6.77		1715.9		34		cytoskeleton	protein binding	Pf00307, Pf11971		ENSG00000178209.14		8				0	18.5	178.9	190.5	366	1031.2	95.9	0.4	0.6	0.5	920.3	10	0.3	0.6	0.3	0.1	0.1	0.5	0.4
TRUE	High	Master Protein	Q14152	Eukaryotic translation initiation factor 3 subunit A OS=Homo sapiens OX=9606 GN=EIF3A PE=1 SV=1	0	FALSE	162.164	29	35	265	35	1	1382	166.5	6.79	4100	317.68	33	32	cell organization and biogenesis;metabolic process;regulation of biological process	cytoplasm;cytosol;membrane;nucleus	protein binding;RNA binding;structural molecule activity	Pf01399	8661	ENSG00000107581.12	EIF3A	10	hsa03013	RNA transport	Translation Factors	0	182.4	123.9	97	174.5	81.4	129.2	65.5	61.1	87.9	106.8	103.8	62.3	75.2	36.6	74.8	95.2	45	38.2
TRUE	High	Master Protein	P13611	Versican core protein OS=Homo sapiens OX=9606 GN=VCAN PE=1 SV=3	0	FALSE	161.979	9	25	314	12	1	3396	372.6	4.51	5369	449.8	24	21	cell differentiation;cell organization and biogenesis;cellular component movement;development;metabolic process	extracellular;membrane;organelle lumen	metal ion binding;protein binding;structural molecule activity	Pf00008, Pf00059, Pf00084, Pf00193, Pf07645, Pf12947	1462	ENSG00000038427.15	VCAN	5	hsa04514	Cell adhesion molecules (CAMs)	Spinal Cord Injury	13	27.7	24.3	14	32.5	55.1	41.4	15.2	29.3	11.9	101.9	50	194.3	246.2	123.3	75	141.5	50.3	179.1
TRUE	High	Master Protein	P09429	High mobility group protein B1 OS=Homo sapiens OX=9606 GN=HMGB1 PE=1 SV=3	0	FALSE	161.818	41	14	494	12	1	215	24.9	5.74	9425	999.15	14	13	cell differentiation;cell organization and biogenesis;cell proliferation;cellular component movement;cellular homeostasis;defense response;metabolic process;regulation of biological process;response to stimulus;transport	cell surface;chromosome;cytoplasm;endosome;extracellular;membrane;nucleus;organelle lumen	catalytic activity;DNA binding;enzyme regulator activity;protein binding;RNA binding	Pf00505, Pf09011	3146	ENSG00000189403.14	HMGB1	13	hsa03410	Base excision repair	DNA Damage Response (only ATM dependent); Retinoblastoma (RB) in Cancer	2	163	205.9	79.6	213.8	122.5	147.9	79	65.4	97.3	136.3	31.9	82.8	19.7	20.1	98.4	87.7	92.4	46.8
TRUE	High	Master Protein	P55196	Afadin OS=Homo sapiens OX=9606 GN=AFDN PE=1 SV=3	0	FALSE	161.4	23	26	127	20	1	1824	206.7	6.47	2658	190.98	25	21	cell communication;cell organization and biogenesis;regulation of biological process;response to stimulus	cytosol;membrane	protein binding	Pf00498, Pf00595, Pf00788, Pf01843	4301	ENSG00000130396.20	MLLT4; AFDN	6	hsa04014; hsa04530; hsa04024; hsa04015; hsa04520; hsa04670	Ras signaling pathway; Tight junction; cAMP signaling pathway; Rap1 signaling pathway; Adherens junction; Leukocyte transendothelial migration	VEGFA-VEGFR2 Signaling Pathway	6	52.1	317.5	37	29.3	29.1	43	52.2	151.8	50.9	54.8	56.8	111.9	116.7	42.4	26.5	86.7	647.3	498.3
TRUE	High	Master Protein	P36955	Pigment epithelium-derived factor OS=Homo sapiens OX=9606 GN=SERPINF1 PE=1 SV=4	0	FALSE	161.071	57	18	412	18	1	418	46.3	6.38	8855	597.14	18	16	cell proliferation;cellular homeostasis;development;regulation of biological process;response to stimulus	extracellular	enzyme regulator activity;protein binding	Pf00079	5176	ENSG00000132386.10	SERPINF1	17	hsa04310	Wnt signaling pathway		0	74.7	44.1	137	51.9	34.6	37.9	58.4	50	210.5	32.5	92.6	141.4	403.9	416	113.1	51.9	61.4	228.7
TRUE	High	Master Protein	O94788	Retinal dehydrogenase 2 OS=Homo sapiens OX=9606 GN=ALDH1A2 PE=1 SV=3	0	FALSE	160.774	58	25	230	21	1	518	56.7	6.05	4183	272.92	24	24	cell differentiation;metabolic process;regulation of biological process;response to stimulus	cytoplasm;cytosol	catalytic activity	Pf00171, Pf05893	8854	ENSG00000128918.14	ALDH1A2	15	hsa00830; hsa01100	Retinol metabolism; Metabolic pathways	Tryptophan metabolism; Vitamin A and Carotenoid Metabolism	1	14	16.8	20.1	644.8	58.9	166.7	59.1	25.4	31	53.8	93.5	63.1	26.1	15.2	17.6	35.1	14.4	14
TRUE	High	Master Protein	P28289	Tropomodulin-1 OS=Homo sapiens OX=9606 GN=TMOD1 PE=1 SV=1	0	FALSE	160.747	68	22	598	21	1	359	40.5	5.1	12090	993.25	22	21	cell organization and biogenesis;cellular component movement;regulation of biological process;response to stimulus	cytoplasm;cytoskeleton;cytosol;membrane	metal ion binding;protein binding	Pf03250	7111	ENSG00000136842.13	TMOD1	9			Striated Muscle Contraction	1	144.7	231.1	91.1	138.6	114.4	136.4	118.3	156.6	158.9	128.7	146.9	27.2	93.4	36.1	117.2	59.3	66.6	56.7
TRUE	High	Master Protein	A0A087WWU8	Tropomyosin alpha-3 chain OS=Homo sapiens OX=9606 GN=TPM3 PE=1 SV=1	0	FALSE	160.704	63	24	486	9	1	227	26.4	4.78		1675.76		24	cell organization and biogenesis;cellular component movement	cytoskeleton;cytosol	protein binding;structural molecule activity	Pf00261, Pf12718	7170	ENSG00000143549.19	TPM3	1			Striated Muscle Contraction	0	144.3	116.4	217.5	145.5	75.1	79.4	48.8	50.5	119.7	123.7	68	99	82	85.8	72.5	203.4	108.9	98
TRUE	High	Master Protein	P01031	Complement C5 OS=Homo sapiens OX=9606 GN=C5 PE=1 SV=4	0	FALSE	160.658	28	34	179	34	1	1676	188.2	6.52	2900	178.05	33	23	cellular component movement;defense response;metabolic process;regulation of biological process;response to stimulus	extracellular	enzyme regulator activity;protein binding	Pf00207, Pf01759, Pf01821, Pf01835, Pf07677, Pf07678, Pf07703, Pf11974	727	ENSG00000106804.7	C5	9	hsa05168; hsa05020; hsa04610; hsa05150; hsa05322; hsa05133	Herpes simplex infection; Prion diseases; Complement and coagulation cascades; Staphylococcus aureus infection; Systemic lupus erythematosus; Pertussis	Spinal Cord Injury; Complement Activation; Oxidative Damage; Allograft Rejection	0	28.8	58.6	69.5	59.1	72.1	55.1	59.1	379.4	27.1	44.7	69.2	69.4	76.1	210.2	40.7	99.9	94.1	189
TRUE	High	Master Protein	Q16363	Laminin subunit alpha-4 OS=Homo sapiens OX=9606 GN=LAMA4 PE=1 SV=4	0	FALSE	160.295	20	25	300	25	1	1823	202.4	6.28	5320	390.78	25	20	cell organization and biogenesis;regulation of biological process;transport	cytoskeleton;extracellular;membrane	catalytic activity;motor activity;protein binding;structural molecule activity	Pf00053, Pf00054, Pf00529, Pf01576, Pf02210, Pf03302, Pf05483, Pf06008, Pf06009, Pf06160, Pf07888, Pf10174, Pf12128, Pf13385, Pf13868, Pf14662	3910		LAMA4	6	hsa04151; hsa04510; hsa05222; hsa05146; hsa04512; hsa05200; hsa05143; hsa05145	PI3K-Akt signaling pathway; Focal adhesion; Small cell lung cancer; Amoebiasis; ECM-receptor interaction; Pathways in cancer; African trypanosomiasis; Toxoplasmosis	Focal Adhesion; miRNA targets in ECM and membrane receptors; Focal Adhesion-PI3K-Akt-mTOR-signaling pathway	0	108.5	77.2	79.8	103.8	62.4	98.2	170.8	126.8	91.1	95.7	77.8	69.9	137.7	54.1	101.4	75	181.4	34.6
TRUE	High	Master Protein	P29762	Cellular retinoic acid-binding protein 1 OS=Homo sapiens OX=9606 GN=CRABP1 PE=1 SV=2	0	FALSE	159.799	85	16	1518	15	1	137	15.6	5.38	41355	2832.06	15	14	development;metabolic process;regulation of biological process;response to stimulus;transport	cytoplasm;cytosol	protein binding;transporter activity	Pf00061, Pf14651	1381	ENSG00000166426.7	CRABP1	15			Vitamin A and Carotenoid Metabolism	1	170	376.7	171.2	106	3.7	106	43.3	152.4	52.4	50.9	11.2	15.1	54.2	43.4	279	3.7	462.3	4.6
TRUE	High	Master Protein	Q63ZY3	KN motif and ankyrin repeat domain-containing protein 2 OS=Homo sapiens OX=9606 GN=KANK2 PE=1 SV=1	0	FALSE	159.756	40	24	387	24	1	851	91.1	5.63	8675	588.9	24	22	cell death;metabolic process;regulation of biological process	cytoplasm;mitochondrion	protein binding	Pf00023, Pf12075, Pf12796, Pf13606, Pf13637, Pf13857	25959	ENSG00000197256.10	KANK2	19				0	71.3	93.1	39.8	109.8	1238.8	69.9	60.3	49.5	101.3	60.3	60.7	16.1	36.7	8.6	36.3	13.3	56.2	26.4
TRUE	High	Master Protein	P00966	Argininosuccinate synthase OS=Homo sapiens OX=9606 GN=ASS1 PE=1 SV=2	0	FALSE	159.659	51	21	588	21	1	412	46.5	8.02	10331	983.1	20	21	metabolic process;regulation of biological process;response to stimulus	cytoplasm;cytosol;mitochondrion	catalytic activity;nucleotide binding;protein binding;RNA binding	Pf00764, Pf03054, Pf06508	445	ENSG00000130707.17	ASS1	9	hsa01100; hsa00220; hsa00250; hsa01230	Metabolic pathways; Arginine biosynthesis; Alanine, aspartate and glutamate metabolism; Biosynthesis of amino acids	Amino Acid metabolism; Alanine and aspartate metabolism; Urea cycle and metabolism of amino groups	0	51.2	140.1	90.3	105.6	78.4	65.1	134.4	131.9	206.4	156	229	49.1	64.6	39.7	85.8	43.3	78.8	35.1
TRUE	High	Master Protein	P09211	Glutathione S-transferase P OS=Homo sapiens OX=9606 GN=GSTP1 PE=1 SV=2	0	FALSE	159.475	92	18	1049	18	1	210	23.3	5.64	26647	1940.08	18	15	cell communication;cell proliferation;metabolic process;regulation of biological process;response to stimulus;transport	cytoplasm;cytosol;extracellular;membrane;mitochondrion;nucleus;organelle lumen	antioxidant activity;catalytic activity;enzyme regulator activity;protein binding	Pf00043, Pf02798, Pf14497	2950	ENSG00000084207.15	GSTP1	11	hsa00982; hsa00980; hsa01524; hsa05215; hsa00480; hsa05204; hsa05200	Drug metabolism - cytochrome P450; Metabolism of xenobiotics by cytochrome P450; Platinum drug resistance; Prostate cancer; Glutathione metabolism; Chemical carcinogenesis; Pathways in cancer	Metapathway biotransformation; Arachidonate Epoxygenase / Epoxide Hydrolase; NRF2 pathway; Photodynamic therapy-induced NFE2L2 (NRF2) survival signaling; Exercise-induced Circadian Regulation	0	127.5	164.7	149.3	161	107.9	109.3	108.3	100.4	146.9	110.3	88.5	83.8	72.5	71.4	93.8	116.9	100.1	85.2
TRUE	High	Master Protein	P11717	Cation-independent mannose-6-phosphate receptor OS=Homo sapiens OX=9606 GN=IGF2R PE=1 SV=3	0	FALSE	159.399	17	30	136	30	1	2491	274.2	5.94	2327	213.05	26	27	cell organization and biogenesis;regulation of biological process;response to stimulus;transport	cell surface;cytoplasm;endosome;Golgi;membrane;nucleus;vacuole	catalytic activity;protein binding;receptor activity;signal transducer activity;transporter activity	Pf00040, Pf00878, Pf02157, Pf09451	3482	ENSG00000197081.12	IGF2R	6	hsa04142; hsa04144	Lysosome; Endocytosis		0	31.3	173.1	95.8	175.2	96.7	305.6	157.8	161.7	116.8	108.9	154.9	65.6	106.1	29.7	104.9	103	50.1	62.2
TRUE	High	Master Protein	P17987	T-complex protein 1 subunit alpha OS=Homo sapiens OX=9606 GN=TCP1 PE=1 SV=1	0	FALSE	159.142	62	27	418	27	1	556	60.3	6.11	6767	615.09	27	25	cell organization and biogenesis;metabolic process;regulation of biological process;response to stimulus;transport	cytoplasm;cytoskeleton;cytosol;Golgi	nucleotide binding;protein binding;RNA binding	Pf00118	6950	ENSG00000120438.11	TCP1	6				0	103.7	133.6	85.6	133.5	88.7	109.6	63.8	64.4	106.3	131.8	91.1	54.6	87.6	78.8	83.6	78.9	85.5	74.5
TRUE	High	Master Protein	P00352	Retinal dehydrogenase 1 OS=Homo sapiens OX=9606 GN=ALDH1A1 PE=1 SV=2	0	FALSE	158.908	52	26	260	22	1	501	54.8	6.73	4363	299.86	25	23	metabolic process;regulation of biological process	cytoplasm;cytosol	catalytic activity;enzyme regulator activity;nucleotide binding	Pf00171, Pf05893, Pf07368	216	ENSG00000165092.12	ALDH1A1	9	hsa00830; hsa01100	Retinol metabolism; Metabolic pathways	Folate-Alcohol and Cancer Pathway; Tryptophan metabolism; Amino Acid metabolism; Vitamin A and Carotenoid Metabolism; Fatty Acid Omega Oxidation; Dopaminergic Neurogenesis	0	37.6	54.1	123.7	65.4	90	73.9	22.8	29.5	12.6	40.3	67.6	1019.4	59.1	36.8	37	57.2	36.8	27.1
TRUE	High	Master Protein	E7EX90	Dynactin subunit 1 OS=Homo sapiens OX=9606 GN=DCTN1 PE=1 SV=1	0	FALSE	158.553	44	38	182	7	1	1256	139	5.67		610.4		38	cell organization and biogenesis;cellular component movement;metabolic process;transport	cytoskeleton;cytosol	protein binding	Pf00261, Pf01302, Pf04111, Pf05622, Pf05667, Pf06160, Pf08317, Pf12128, Pf12329, Pf12455, Pf13166, Pf13514, Pf15035		ENSG00000204843.12		2				0	876.9	511.2	647.4	52.6	8.4	163.8	16.7	64.3	12.8	39.6	7	50.8	26.2	44.3	19.3	4.9	53.2	44.4
TRUE	High	Master Protein	P40227	T-complex protein 1 subunit zeta OS=Homo sapiens OX=9606 GN=CCT6A PE=1 SV=3	0	FALSE	158.426	59	27	523	22	1	531	58	6.68	9049	699.42	25	21	metabolic process;regulation of biological process	cytoplasm;cytosol;membrane	nucleotide binding;protein binding;RNA binding	Pf00118, Pf05504	908	ENSG00000146731.10	CCT6A	7				5	57.7	76.6	55.6	61.7	52.7	64.4	44.4	41.1	62.5	69.6	49.9	126.1	95.5	34.1	82.9	68	50.5	28.7
TRUE	High	Master Protein	Q12797	Aspartyl/asparaginyl beta-hydroxylase OS=Homo sapiens OX=9606 GN=ASPH PE=1 SV=3	0	FALSE	158.353	39	25	258	25	1	758	85.8	5.01	4167	354.86	24	22	metabolic process;regulation of biological process;response to stimulus;transport	cytoplasm;endoplasmic reticulum;membrane;organelle lumen	catalytic activity;metal ion binding;protein binding;structural molecule activity	Pf05118, Pf05279, Pf13414, Pf13428, Pf13432, Pf14559	444	ENSG00000198363.17	ASPH	8				0	158.1	153.5	80.7	146	75.4	218.5	83.4	75.9	116.3	172.8	127.5	103.5	77.7	40.4	136.9	137	52.6	72.2
TRUE	High	Master Protein	H0YK48	Tropomyosin alpha-1 chain OS=Homo sapiens OX=9606 GN=TPM1 PE=1 SV=1	0	FALSE	158.243	73	26	381	0	1	248	28.6	4.77		1226.6		26	cell organization and biogenesis;cellular component movement;regulation of biological process;response to stimulus	cytoskeleton;cytosol	protein binding;structural molecule activity	Pf00261, Pf12718	7168	ENSG00000140416.19	TPM1	15			Striated Muscle Contraction	3	106.3	294	10.1	99.4	154.9	116.3	77.9	110.4	320.9	101.3	174.8	54.7	69.9	41	210.3	108.5	35	188.8
TRUE	High	Master Protein	Q8N8S7	Protein enabled homolog OS=Homo sapiens OX=9606 GN=ENAH PE=1 SV=2	0	FALSE	158.15	43	20	252	19	1	591	66.5	6.93	5000	442.38	20	19	cellular component movement	cytoplasm;cytoskeleton;cytosol;membrane	protein binding	Pf00568, Pf08776	55740	ENSG00000154380.17	ENAH	1	hsa04810; hsa04360	Regulation of actin cytoskeleton; Axon guidance	Regulation of Actin Cytoskeleton	1	250.5	76	35.1	284.8	43.3	242.9	53.3	60.8	137.8	276.7	65.9	138.6	89.9	30.1	178	142.4	38.4	34.3
TRUE	High	Master Protein	Q01813	ATP-dependent 6-phosphofructokinase, platelet type OS=Homo sapiens OX=9606 GN=PFKP PE=1 SV=2	0	FALSE	157.964	39	22	234	20	1	784	85.5	7.55	4952	341.62	21	19	metabolic process	cytoplasm;cytosol;membrane;nucleus	catalytic activity;metal ion binding;nucleotide binding;protein binding	Pf00365	5214	ENSG00000067057.16	PFKP	10	hsa00052; hsa01230; hsa00030; hsa05230; hsa00010; hsa04919; hsa01100; hsa01200; hsa03018; hsa04152; hsa00051	Galactose metabolism; Biosynthesis of amino acids; Pentose phosphate pathway; Central carbon metabolism in cancer; Glycolysis / Gluconeogenesis; Thyroid hormone signaling pathway; Metabolic pathways; Carbon metabolism; RNA degradation; AMPK signaling pathway; Fructose and mannose metabolism	Glycolysis and Gluconeogenesis; Cori Cycle	0	40.7	22.6	11.5	10.2	85.1	19.2	151.1	160.7	5.3	28.2	50.5	28.8	76.9	48.5	35.7	54.6	128.7	38.5
TRUE	High	Master Protein	Q13263	Transcription intermediary factor 1-beta OS=Homo sapiens OX=9606 GN=TRIM28 PE=1 SV=5	0	FALSE	157.953	43	22	324	22	1	835	88.5	5.77	6543	452.65	21	19	cell organization and biogenesis;defense response;metabolic process;regulation of biological process;response to stimulus	chromosome;nucleus	catalytic activity;DNA binding;metal ion binding;protein binding;RNA binding	Pf00628, Pf00643	10155	ENSG00000130726.11	TRIM28	19			ATM Signaling Network in Development and Disease; Corticotropin-releasing hormone signaling pathway; Mesodermal Commitment Pathway	0	189.5	160	73.7	134.4	53.7	144.2	71.7	86.8	66.2	146.8	90	294.4	71.4	35.9	66	164.6	65.2	29.1
TRUE	High	Master Protein	P27348	14-3-3 protein theta OS=Homo sapiens OX=9606 GN=YWHAQ PE=1 SV=1	0	FALSE	157.108	49	16	804	13	1	245	27.7	4.78	18121	1241.04	16	15	cell organization and biogenesis;regulation of biological process;response to stimulus;transport	cytoplasm;cytosol;membrane;mitochondrion	protein binding	Pf00244	10971	ENSG00000134308.13	YWHAQ	2	hsa04110; hsa05161; hsa04390; hsa05203; hsa04151; hsa04114; hsa05169; hsa05130	Cell cycle; Hepatitis B; Hippo signaling pathway; Viral carcinogenesis; PI3K-Akt signaling pathway; Oocyte meiosis; Epstein-Barr virus infection; Pathogenic Escherichia coli infection	IL-3 Signaling Pathway; Primary Focal Segmental Glomerulosclerosis FSGS; Sudden Infant Death Syndrome (SIDS) Susceptibility Pathways; Myometrial Relaxation and Contraction Pathways; Cell Cycle; Pathogenic Escherichia coli infection; Calcium Regulation in the Cardiac Cell	0	118.9	154.5	88	216.5	132.1	172.7	105.7	124.9	219.2	67.8	162.9	142.1	128.5	24.7	172.7	143.2	59.1	63.4
TRUE	High	Master Protein	O14639	Actin-binding LIM protein 1 OS=Homo sapiens OX=9606 GN=ABLIM1 PE=1 SV=3	0	FALSE	157.103	34	23	218	4	1	778	87.6	8.59	4193	360.52	23	21	cell organization and biogenesis	cytoplasm;cytoskeleton	metal ion binding;protein binding	Pf00412, Pf02209	3983	ENSG00000099204.18	ABLIM1	10	hsa04360	Axon guidance		19	260.8	71.4	33.8	316.7	73.7	243	36.3	59.6	93.4	422.1	86.4	56.7	42.4	13.9	74.8	61.4	63.2	22.7
TRUE	High	Master Protein	P53675	Clathrin heavy chain 2 OS=Homo sapiens OX=9606 GN=CLTCL1 PE=1 SV=2	0	FALSE	156.609	10	19	720	1	1	1640	186.9	5.85	14763	1066.49	18	18	cell organization and biogenesis;regulation of biological process;response to stimulus;transport	cytosol;endosome;membrane	protein binding;signal transducer activity;structural molecule activity	Pf00637, Pf01394, Pf04053, Pf09268, Pf13838	8218	ENSG00000070371.15	CLTCL1	22	hsa04961; hsa04721; hsa04144; hsa05100; hsa05016; hsa04142	Endocrine and other factor-regulated calcium reabsorption; Synaptic vesicle cycle; Endocytosis; Bacterial invasion of epithelial cells; Huntington's disease; Lysosome	Synaptic Vesicle Pathway	0	17.3	5.9	17.8	20.2	37.9	16.2	1.3	22.3	28.2	5.4	28.7	22.6	14.4	6.7	51.4	22.9	219.5	16.3
TRUE	High	Master Protein	P31946	14-3-3 protein beta/alpha OS=Homo sapiens OX=9606 GN=YWHAB PE=1 SV=3	0	FALSE	156.495	64	18	691	12	1	246	28.1	4.83	15959	1217.79	18	15	cell organization and biogenesis;metabolic process;regulation of biological process;response to stimulus;transport	cytoplasm;cytosol;membrane;mitochondrion;nucleus	protein binding	Pf00244	7529	ENSG00000166913.12	YWHAB	20	hsa05169; hsa04151; hsa04390; hsa05203; hsa04110; hsa04114; hsa05161	Epstein-Barr virus infection; PI3K-Akt signaling pathway; Hippo signaling pathway; Viral carcinogenesis; Cell cycle; Oocyte meiosis; Hepatitis B	Calcium Regulation in the Cardiac Cell; IL-3 Signaling Pathway; Sudden Infant Death Syndrome (SIDS) Susceptibility Pathways; Myometrial Relaxation and Contraction Pathways; Cell Cycle	2	122	122.7	118.1	339.3	200.5	172.2	121.4	123.7	160.7	220.7	74.6	119.6	52	22.2	112	112.5	27	45
TRUE	High	Master Protein	Q05639	Elongation factor 1-alpha 2 OS=Homo sapiens OX=9606 GN=EEF1A2 PE=1 SV=1	0	FALSE	156.457	61	20	1155	8	1	463	50.4	9.03	20623	1647.36	19	15	metabolic process;regulation of biological process;response to stimulus	cytoplasm;nucleus	catalytic activity;nucleotide binding;protein binding;RNA binding	Pf00009, Pf03143, Pf03144	1917	ENSG00000101210.10	EEF1A2	20	hsa03013; hsa05134	RNA transport; Legionellosis	Translation Factors	0	1728.7	60.8	72.5	104.6	22.8	10.2	88	18.6	58.9	14.3	109.3	7.8	30.8	14.3	12.5	366.9	23.6	17.4
TRUE	High	Master Protein	Q04637	Eukaryotic translation initiation factor 4 gamma 1 OS=Homo sapiens OX=9606 GN=EIF4G1 PE=1 SV=4	0	FALSE	156.35	24	28	260	22	1	1599	175.4	5.33	4579	383.17	28	24	cell organization and biogenesis;defense response;metabolic process;regulation of biological process;response to stimulus	cytoplasm;cytosol;membrane;nucleus	nucleotide binding;protein binding;RNA binding;structural molecule activity	Pf00566, Pf02020, Pf02847, Pf02854	1981	ENSG00000114867.20	EIF4G1	3	hsa03013; hsa05416	RNA transport; Viral myocarditis	Translation Factors	5	153	109.1	61.7	192.9	61	146.9	53	63.4	137.5	146.5	142.1	63	34.9	22.2	117.2	229.1	238.7	32.6
TRUE	High	Master Protein	P01834	Immunoglobulin kappa constant OS=Homo sapiens OX=9606 GN=IGKC PE=1 SV=2	0	FALSE	156.183	82	9	2377	3	1	107	11.8	6.52	58400	4365.89	9	9	cell organization and biogenesis;cellular component movement;defense response;metabolic process;regulation of biological process;response to stimulus;transport	extracellular;membrane	catalytic activity;protein binding	Pf07654	3514		IGKC	2				6	72.8	52.6	103.8	137	102.6	80.5	111.1	117.9	84.6	52.5	131	154.7	85.5	397.3	69.3	49.7	64.3	322.3
TRUE	High	Master Protein	P49189	4-trimethylaminobutyraldehyde dehydrogenase OS=Homo sapiens OX=9606 GN=ALDH9A1 PE=1 SV=3	0	FALSE	155.842	48	22	439	22	1	494	53.8	5.87	7536	539.23	22	20	metabolic process	cytoplasm;cytosol	catalytic activity	Pf00171	223		ALDH9A1	1	hsa00380; hsa00071; hsa00620; hsa00330; hsa00053; hsa00561; hsa00280; hsa00310; hsa00010; hsa00340; hsa01100; hsa00410	Tryptophan metabolism; Fatty acid degradation; Pyruvate metabolism; Arginine and proline metabolism; Ascorbate and aldarate metabolism; Glycerolipid metabolism; Valine, leucine and isoleucine degradation; Lysine degradation; Glycolysis / Gluconeogenesis; Histidine metabolism; Metabolic pathways; beta-Alanine metabolism	Tryptophan metabolism	0	75.9	92.3	102.5	125.8	128.4	68.5	78.7	38.7	81.9	52.5	49.5	59.5	50.2	35.9	59.7	81.1	190.7	49.6
TRUE	High	Master Protein	P61764	Syntaxin-binding protein 1 OS=Homo sapiens OX=9606 GN=STXBP1 PE=1 SV=1	0	FALSE	155.76	43	25	137	6	1	594	67.5	6.96	2451	205.58	25	20	cell communication;cell organization and biogenesis;regulation of biological process;response to stimulus;transport	cytoplasm;cytoskeleton;cytosol;membrane;mitochondrion;nucleus	protein binding;RNA binding	Pf00995	6812	ENSG00000136854.19	STXBP1	9	hsa04721	Synaptic vesicle cycle	Insulin Signaling; Synaptic Vesicle Pathway; EGF/EGFR Signaling Pathway	19	35.9	38.2	19.8	28.9	52.5	20.6	92.9	26.3	24.5	35.2	41.9	85.7	17.2	31.5	28.3	270.2	27.2	25.3
TRUE	High	Master Protein	Q15436	Protein transport protein Sec23A OS=Homo sapiens OX=9606 GN=SEC23A PE=1 SV=2	0	FALSE	155.447	40	20	290	17	1	765	86.1	7.08	6734	481.61	20	20	cell organization and biogenesis;transport	cytoplasm;cytosol;endoplasmic reticulum;membrane	metal ion binding;protein binding	Pf00626, Pf04810, Pf04811, Pf04815, Pf08033	10484	ENSG00000100934.14	SEC23A	14	hsa04141	Protein processing in endoplasmic reticulum	Sterol Regulatory Element-Binding Proteins (SREBP) signalling	3	164.6	141.9	102.5	183.2	74.2	140.4	78.9	72.6	136	191.3	131.6	78.8	173.4	68.8	60.3	211.3	148	29.2
TRUE	High	Master Protein	Q9Y2H5	Pleckstrin homology domain-containing family A member 6 OS=Homo sapiens OX=9606 GN=PLEKHA6 PE=1 SV=4	0	FALSE	155.393	41	30	184	6	1	1048	117.1	9.1	2539	234.43	29	24				Pf00169, Pf15413	22874	ENSG00000143850.13	PLEKHA6	1				21	183.2	106.9	46.9	114.4	95.5	94.7	54.9	39	139.6	155.9	156.7	26.8	18.3	212.6	47.1	30.4	78	26.8
TRUE	High	Master Protein	O00410	Importin-5 OS=Homo sapiens OX=9606 GN=IPO5 PE=1 SV=4	0	FALSE	155.338	33	26	217	24	1	1097	123.6	4.94	3605	291.56	25	24	regulation of biological process;response to stimulus;transport	cytoplasm;membrane;nucleus	enzyme regulator activity;protein binding;RNA binding;transporter activity	Pf02985, Pf12755, Pf13513, Pf13646	3843	ENSG00000065150.18	IPO5	13				2	223.7	144.9	104.1	154.5	105.2	166.1	65.9	109.5	114.2	89.5	110.4	173.8	42.6	23.6	423.9	187.3	68.5	61.4
TRUE	High	Master Protein	O15031	Plexin-B2 OS=Homo sapiens OX=9606 GN=PLXNB2 PE=1 SV=3	0	FALSE	155.299	25	29	195	28	1	1838	205	6.24	3234	290.57	28	20	cell proliferation;development;regulation of biological process;response to stimulus	cell surface;membrane	protein binding;receptor activity;signal transducer activity	Pf01403, Pf01437, Pf01833, Pf08337	23654	ENSG00000196576.14	PLXNB2	22	hsa04360	Axon guidance		1	156.9	166	63.7	162.5	93.9	98.9	119.1	119.4	125.9	123.9	93.1	73.7	89.5	34.1	68.1	114.9	65.8	56.8
TRUE	High	Master Protein	P29590	Protein PML OS=Homo sapiens OX=9606 GN=PML PE=1 SV=3	0	FALSE	155.009	41	26	212	26	1	882	97.5	6.21	3715	330.87	25	21	cell death;cell differentiation;cell organization and biogenesis;cellular component movement;cellular homeostasis;defense response;metabolic process;regulation of biological process;response to stimulus;transport	cytoplasm;cytosol;endoplasmic reticulum;endosome;membrane;nucleus	DNA binding;metal ion binding;protein binding	Pf00097, Pf00643, Pf12126, Pf13639, Pf13920, Pf14634, Pf14835	5371	ENSG00000140464.19	PML	15	hsa05221; hsa05202; hsa04144; hsa05168; hsa05200; hsa04120; hsa05164	Acute myeloid leukemia; Transcriptional misregulation in cancer; Endocytosis; Herpes simplex infection; Pathways in cancer; Ubiquitin mediated proteolysis; Influenza A	TGF-beta Signaling Pathway; miRNA Regulation of DNA Damage Response; Wnt/beta-catenin Signaling Pathway in Leukemia; DNA Damage Response	0	159.9	140.3	77.8	142	98.8	216	47.5	77.8	147.2	150.9	129	69.7	72.7	58	165.1	203.8	36	46.7
TRUE	High	Master Protein	P09936	Ubiquitin carboxyl-terminal hydrolase isozyme L1 OS=Homo sapiens OX=9606 GN=UCHL1 PE=1 SV=2	0	FALSE	154.371	73	13	365	13	1	223	24.8	5.48	8096	764.22	13	13	cell communication;cell organization and biogenesis;cell proliferation;cellular component movement;metabolic process;regulation of biological process;response to stimulus;transport	cytoplasm;cytosol;endoplasmic reticulum;membrane	catalytic activity;protein binding	Pf01088	7345	ENSG00000154277.12	UCHL1	4	hsa05012	Parkinson's disease	Hepatitis C and Hepatocellular Carcinoma; Parkinsons Disease Pathway; Proteasome Degradation	0	147.3	182.5	65.5	13.1	159.6	139	52.4	39.3	182.8	166.7	117.7	17.5	87.8	73.2	81.3	114.4	14	67
TRUE	High	Master Protein	O15439	Multidrug resistance-associated protein 4 OS=Homo sapiens OX=9606 GN=ABCC4 PE=1 SV=3	0	FALSE	154.152	26	25	79	25	1	1325	149.4	8.19	1427	134.22	24	24	cell organization and biogenesis;metabolic process;regulation of biological process;response to stimulus;transport	membrane	catalytic activity;nucleotide binding;transporter activity	Pf00005, Pf00664, Pf01926, Pf08477, Pf13191	10257	ENSG00000125257.13	ABCC4	13	hsa04024; hsa01523; hsa02010; hsa04976	cAMP signaling pathway; Antifolate resistance; ABC transporters; Bile secretion	NRF2 pathway; Photodynamic therapy-induced NFE2L2 (NRF2) survival signaling; Fluoropyrimidine Activity; TYROBP Causal Network; Ectoderm Differentiation; Drug Induction of Bile Acid Pathway	0	75.3	1091.5	112.4	37	53.9	76	44	51.9	38.7	54.5	46.8	77.9	32.7	28.3	44.9	71.1	105.1	46.9
TRUE	High	Master Protein	P07451	Carbonic anhydrase 3 OS=Homo sapiens OX=9606 GN=CA3 PE=1 SV=3	0	FALSE	153.959	81	15	271	15	1	260	29.5	7.34	4844	374.56	15	15	metabolic process;response to stimulus;transport	cytoplasm;cytosol	catalytic activity;metal ion binding	Pf00194	761	ENSG00000164879.6	CA3	8	hsa00910	Nitrogen metabolism		0	9.4	22	17	89.9	8.6	611.9	8	22.7	11.6	7.8	11.1	17	16.3	15	367.1	9.5	16.9	9.4
TRUE	High	Master Protein	Q99714	3-hydroxyacyl-CoA dehydrogenase type-2 OS=Homo sapiens OX=9606 GN=HSD17B10 PE=1 SV=3	0	FALSE	153.481	90	18	431	18	1	261	26.9	7.78	9770	705.16	18	18	cell organization and biogenesis;metabolic process	cytoplasm;membrane;mitochondrion;organelle lumen	catalytic activity;protein binding;RNA binding	Pf00106, Pf08659, Pf13561	3028	ENSG00000072506.12	HSD17B10	X	hsa05010; hsa00280; hsa01100	Alzheimer's disease; Valine, leucine and isoleucine degradation; Metabolic pathways	Valproic acid pathway; Tryptophan metabolism; Alzheimers Disease	0	240.9	220.4	128	236.4	160.9	257	121.8	86.4	116	147.7	107.7	45.9	50.5	41.5	69.3	51.2	80.9	44.5
TRUE	High	Master Protein	P28482	Mitogen-activated protein kinase 1 OS=Homo sapiens OX=9606 GN=MAPK1 PE=1 SV=3	0	FALSE	153.038	73	20	296	14	1	360	41.4	6.98	5488	363.4	20	16	cell communication;cell death;cell differentiation;cell proliferation;cellular component movement;cellular homeostasis;metabolic process;regulation of biological process;response to stimulus;transport	cytoplasm;cytoskeleton;cytosol;endosome;extracellular;Golgi;membrane;mitochondrion;nucleus;organelle lumen	catalytic activity;DNA binding;nucleotide binding;protein binding;signal transducer activity	Pf00069, Pf01636, Pf07714	5594	ENSG00000100030.14	MAPK1	22	hsa04350; hsa04066; hsa04662; hsa05224; hsa04261; hsa04510; hsa04114; hsa04915; hsa05142; hsa04724; hsa04022; hsa04921; hsa04919; hsa05145; hsa04730; hsa04550; hsa04380; hsa04917; hsa05223; hsa05200; hsa05133; hsa04960; hsa05216; hsa04912; hsa05131; hsa04320; hsa05230; hsa05140; hsa04930; hsa04933; hsa05231; hsa04620; hsa04014; hsa04725; hsa04658; hsa05161; hsa04722; hsa05213; hsa05214; hsa04916;…	TGF-beta signaling pathway; HIF-1 signaling pathway; B cell receptor signaling pathway; Breast cancer; Adrenergic signaling in cardiomyocytes; Focal adhesion; Oocyte meiosis; Estrogen signaling pathway; Chagas disease (American trypanosomiasis); Glutamatergic synapse; cGMP-PKG signaling pathway; Oxytocin signaling pathway; Thyroid hormone signaling pathway; Toxoplasmosis; Long-term depression; Si…	TNF alpha Signaling Pathway; AGE/RAGE pathway; 4-hydroxytamoxifen, Dexamethasone, and Retinoic Acids Regulation of p27 Expression; Senescence and Autophagy in Cancer; Angiogenesis; IL-1 signaling pathway; Prolactin Signaling Pathway; Toll-like Receptor Signaling; Insulin Signaling; EBV LMP1 signaling; IL-5 Signaling Pathway; Follicle Stimulating Hormone (FSH) signaling pathway; MAPK and NFkB Sign…	4	83.2	98	100.6	121.3	90	85.6	56.2	50.7	101.8	94	79.9	69.3	78.4	29.5	80.3	98.4	59.1	46
TRUE	High	Master Protein	Q8IUX7	Adipocyte enhancer-binding protein 1 OS=Homo sapiens OX=9606 GN=AEBP1 PE=1 SV=1	0	FALSE	153.007	22	20	167	19	1	1158	130.8	5.11	3509	288.58	20	16	metabolic process;regulation of biological process	cytoplasm;extracellular;nucleus	catalytic activity;DNA binding;metal ion binding;protein binding	Pf00246, Pf00754, Pf08400, Pf13620, Pf13715	165	ENSG00000106624.10	AEBP1	7				1	130.7	17.7	102.6	29.6	28.6	61.8	106.1	46.1	35.1	80	26.7	102.8	118.8	210.5	20.7	65.2	139.3	49.9
TRUE	High	Master Protein	H0YNC7	Tropomyosin alpha-1 chain (Fragment) OS=Homo sapiens OX=9606 GN=TPM1 PE=1 SV=1	0	FALSE	152.848	74	24	367	1	1	223	25.6	4.64		1209.5		24		cytoskeleton;cytosol		Pf00261		ENSG00000140416.19		15				0	0.5	0.3	0.5	0.6	12	45.6	22.7	0.3	34.3	0.1	1.4	0.2	0.9	12.5	33.5	0.2	0.3	0
TRUE	High	Master Protein	O60664	Perilipin-3 OS=Homo sapiens OX=9606 GN=PLIN3 PE=1 SV=3	0	FALSE	152.448	57	15	369	15	1	434	47	5.44	7991	649.3	15	14	transport	cytoplasm;cytosol;endosome;Golgi;membrane	protein binding	Pf03036	10226	ENSG00000105355.8	PLIN3	19				0	161.2	233	112.7	298.8	220.1	101.6	89.5	166.1	259.6	201.8	120.8	33	85.2	28	44.6	145	52	45.5
TRUE	High	Master Protein	P07197	Neurofilament medium polypeptide OS=Homo sapiens OX=9606 GN=NEFM PE=1 SV=3	0	FALSE	152.251	30	21	401	18	1	916	102.4	4.91	5184	476.52	20	14	cell organization and biogenesis;metabolic process;regulation of biological process		protein binding;structural molecule activity	Pf00038, Pf02463, Pf04111, Pf07888, Pf07902, Pf10186, Pf10498, Pf12128, Pf13166, Pf13863	4741	ENSG00000104722.13	NEFM	8	hsa05014	Amyotrophic lateral sclerosis (ALS)	Amyotrophic lateral sclerosis (ALS); Association Between Physico-Chemical Features and Toxicity Associated Pathways	0	41.9	15.3	17.9	43.5	206.9	142.1	17.4	15.1	28.9	19.9	8	74	35.1	27	24.1	359.4	16.8	118.6
TRUE	High	Master Protein	P23246	Splicing factor, proline- and glutamine-rich OS=Homo sapiens OX=9606 GN=SFPQ PE=1 SV=2	0	FALSE	151.766	43	19	394	18	1	707	76.1	9.44	7557	630.43	17	17	cell organization and biogenesis;defense response;metabolic process;regulation of biological process;response to stimulus	chromosome;cytoplasm;nucleus	DNA binding;protein binding;RNA binding	Pf00076, Pf08075, Pf13893, Pf14259	6421	ENSG00000116560.10	SFPQ	1			mRNA Processing	1	127.8	183	67.8	134.8	197.6	162.8	83.3	84.5	168.6	188.6	43.4	40.6	34.6	69.1	46	64.3	45.6	27.7
TRUE	High	Master Protein	P00505	Aspartate aminotransferase, mitochondrial OS=Homo sapiens OX=9606 GN=GOT2 PE=1 SV=3	0	FALSE	151.726	54	20	434	20	1	430	47.5	9.01	7809	709.07	20	18	metabolic process;response to stimulus;transport	cell surface;membrane;mitochondrion;organelle lumen	catalytic activity;protein binding;RNA binding	Pf00155	2806	ENSG00000125166.12	GOT2	16	hsa00270; hsa00250; hsa00400; hsa01210; hsa00350; hsa00360; hsa01200; hsa00330; hsa00220; hsa01100; hsa04975; hsa01230	Cysteine and methionine metabolism; Alanine, aspartate and glutamate metabolism; Phenylalanine, tyrosine and tryptophan biosynthesis; 2-Oxocarboxylic acid metabolism; Tyrosine metabolism; Phenylalanine metabolism; Carbon metabolism; Arginine and proline metabolism; Arginine biosynthesis; Metabolic pathways; Fat digestion and absorption; Biosynthesis of amino acids	Glycolysis and Gluconeogenesis; Amino Acid metabolism; Alanine and aspartate metabolism	0	144.9	112.5	55.2	194.8	69.7	160	65.7	94.5	50.5	98	58.9	81	77	21	121.4	166.9	40.4	68.8
TRUE	High	Master Protein	P54652	Heat shock-related 70 kDa protein 2 OS=Homo sapiens OX=9606 GN=HSPA2 PE=1 SV=1	0	FALSE	151.723	36	19	976	8	1	639	70	5.74	21064	1557.15	18	19	cell differentiation;cell organization and biogenesis;metabolic process;regulation of biological process;response to stimulus	cell surface;cytoplasm;cytoskeleton;cytosol;membrane;mitochondrion;nucleus	nucleotide binding;protein binding	Pf00012, Pf06723	3306	ENSG00000126803.9	HSPA2	14	hsa05164; hsa04141; hsa05169; hsa05134; hsa05162; hsa04010; hsa04213; hsa04612; hsa04915; hsa05145; hsa03040; hsa04144	Influenza A; Protein processing in endoplasmic reticulum; Epstein-Barr virus infection; Legionellosis; Measles; MAPK signaling pathway; Longevity regulating pathway - multiple species; Antigen processing and presentation; Estrogen signaling pathway; Toxoplasmosis; Spliceosome; Endocytosis	Parkin-Ubiquitin Proteasomal System pathway	0	51.3	71.3	6.1	33.4	107	30	17.9	11.9	30.1	36.1	110.2	10.2	67.7	41.8	27.2	123.2	53.4	47.9
TRUE	High	Master Protein	P13645	Keratin, type I cytoskeletal 10 OS=Homo sapiens OX=9606 GN=KRT10 PE=1 SV=6	0	FALSE	151.524	49	23	268	21	1	584	58.8	5.21	5472	307.28	23	22	cell death;cell differentiation;metabolic process	cytoplasm;cytoskeleton;cytosol;membrane;nucleus	structural molecule activity	Pf00038, Pf04111	3858	ENSG00000186395.7	KRT10	17	hsa05150	Staphylococcus aureus infection		2	37.8	37.8	129.7	43.3	31.7	32.1	42	142.9	53.3	39	33.8	28.8	67	16.9	63.5	186.2	34.7	49.8
TRUE	High	Master Protein	Q06323	Proteasome activator complex subunit 1 OS=Homo sapiens OX=9606 GN=PSME1 PE=1 SV=1	0	FALSE	151.152	67	19	548	19	1	249	28.7	6.02	10410	822.39	18	18	metabolic process;regulation of biological process;response to stimulus;transport	cytoplasm;cytosol;proteasome	enzyme regulator activity;protein binding	Pf02251, Pf02252	5720	ENSG00000092010.14	PSME1	14	hsa03050; hsa04612	Proteasome; Antigen processing and presentation	Proteasome Degradation	0	97.7	169.6	102.9	221.5	90.5	88.4	48.9	64	113.3	118.5	89	99.5	80.7	49.3	132.4	138.4	72.1	45.1
TRUE	High	Master Protein	Q9BX66	Sorbin and SH3 domain-containing protein 1 OS=Homo sapiens OX=9606 GN=SORBS1 PE=1 SV=3	0	FALSE	150.839	26	28	187	27	1	1292	142.4	6.84	3138	261.35	26	21	cell organization and biogenesis;regulation of biological process;response to stimulus;transport	cytoplasm;cytoskeleton;cytosol;membrane;nucleus	protein binding	Pf00018, Pf02208, Pf07653, Pf14604	10580	ENSG00000095637.21	SORBS1	10	hsa04910; hsa03320; hsa04520	Insulin signaling pathway; PPAR signaling pathway; Adherens junction	PPAR signaling pathway; Integrin-mediated Cell Adhesion; Insulin Signaling	1	310.5	213.9	23.9	46.8	309.5	112.8	83.5	156.2	84.1	90.1	84.3	30.5	43.3	97.3	27	34.5	130	43.7
TRUE	High	Master Protein	P47756	F-actin-capping protein subunit beta OS=Homo sapiens OX=9606 GN=CAPZB PE=1 SV=4	0	FALSE	150.66	57	18	436	4	1	277	31.3	5.59	8066	695.29	18	14	cell organization and biogenesis;cellular component movement;coagulation;regulation of biological process;transport	cytoplasm;cytoskeleton;cytosol	protein binding	Pf01115	832	ENSG00000077549.17	CAPZB	1	hsa04144	Endocytosis		0
TRUE	High	Master Protein	O00264	Membrane-associated progesterone receptor component 1 OS=Homo sapiens OX=9606 GN=PGRMC1 PE=1 SV=3	0	FALSE	150.615	88	18	505	17	1	195	21.7	4.7	10995	956.98	17	17	transport	endoplasmic reticulum;membrane	protein binding	Pf00173	10857	ENSG00000101856.9	PGRMC1	X				1	51.8	231.8	97.5	298.4	119.3	154	104	205.1	60.3	126	48.7	58.4	75.5	11.1	99.7	96.9	94.1	28.5
TRUE	High	Master Protein	Q02818	Nucleobindin-1 OS=Homo sapiens OX=9606 GN=NUCB1 PE=1 SV=4	0	FALSE	150.611	54	20	295	20	1	461	53.8	5.25	5277	433.44	20	20	metabolic process;regulation of biological process;response to stimulus	cytoplasm;endoplasmic reticulum;endosome;extracellular;Golgi;membrane;nucleus;organelle lumen	DNA binding;metal ion binding;protein binding		4924	ENSG00000104805.15	NUCB1	19				0	173.2	166.7	41.2	155.1	93.9	205.2	79.5	87.3	82.4	140.7	69.4	54.7	36.9	154.2	68.2	35.9	144.5	28.9
TRUE	High	Master Protein	A0A024R4E5	High density lipoprotein binding protein (Vigilin), isoform CRA_a OS=Homo sapiens OX=9606 GN=HDLBP PE=1 SV=1	0	FALSE	149.922	33	31	182	4	1	1268	141.4	6.87		631.51		31	metabolic process;transport	cytosol;membrane;nucleus	protein binding;RNA binding	Pf00013, Pf13014, Pf14611	3069	ENSG00000115677.16	HDLBP	2				0	160.7	123.7	36	287.8	48.3	134.1	48.5	96.9	167.4	148.5	82.7	19.8	14.6	1.4	18.2	127.7	54.6	13.6
TRUE	High	Master Protein	Q9H4G0	Band 4.1-like protein 1 OS=Homo sapiens OX=9606 GN=EPB41L1 PE=1 SV=2	0	FALSE	149.807	38	23	143	10	1	881	98.4	5.62	2099	210.02	23	19	cell organization and biogenesis	cytoplasm;cytoskeleton;cytosol;membrane	protein binding;structural molecule activity	Pf00373, Pf04382, Pf05902, Pf08736, Pf09379, Pf09380	2036	ENSG00000088367.21	EPB41L1	20	hsa04530	Tight junction		9	239.8	135.8	73.4	114.7	65	118.5	63.6	48.6	78.2	79.6	84	127.4	86.3	40.4	96.2	53.9	89.6	118.4
TRUE	High	Master Protein	Q13838	Spliceosome RNA helicase DDX39B OS=Homo sapiens OX=9606 GN=DDX39B PE=1 SV=1	0	FALSE	149.775	54	20	428	9	1	428	49	5.67	6721	479.58	20	18	cell organization and biogenesis;metabolic process;regulation of biological process;transport	cytoplasm;nucleus;spliceosomal complex	catalytic activity;nucleotide binding;protein binding;RNA binding	Pf00270, Pf00271, Pf14617	7919	ENSG00000225859.10; ENSG00000215425.11; ENSG00000198563.13; ENSG00000235439.10; ENSG00000230624.10; ENSG00000225073.10; ENSG00000229496.10	DDX39B	6; CHR_HSCHR6_MHC_MANN_CTG1; CHR_HSCHR6_MHC_QBL_CTG1; CHR_HSCHR6_MHC_SSTO_CTG1; CHR_HSCHR6_MHC_DBB_CTG1; CHR_HSCHR6_MHC_COX_CTG1; CHR_HSCHR6_MHC_MCF_CTG1	hsa03015; hsa05164; hsa03040; hsa03013	mRNA surveillance pathway; Influenza A; Spliceosome; RNA transport		11	119	165.2	64.2	175.3	97.9	103.9	61.2	65.6	96.8	141	83.1	67.7	76.8	36.8	106.4	163.8	74.9	61.3
TRUE	High	Master Protein	P36776	Lon protease homolog, mitochondrial OS=Homo sapiens OX=9606 GN=LONP1 PE=1 SV=2	0	FALSE	149.702	42	27	216	27	1	959	106.4	6.39	3566	337.97	26	21	cell organization and biogenesis;metabolic process;response to stimulus	cytosol;membrane;mitochondrion;nucleus;organelle lumen	catalytic activity;DNA binding;nucleotide binding;protein binding;RNA binding	Pf00004, Pf00910, Pf01695, Pf02190, Pf05362, Pf05496, Pf07724, Pf07728, Pf08298, Pf13173, Pf13191, Pf13207, Pf13401, Pf13541	9361	ENSG00000196365.11	LONP1	19				0	151.8	200.5	60.4	161.8	96.9	167.3	64.1	69.8	85.6	87.6	93.3	52.8	67.2	30	68.5	113.8	62.3	33.9
TRUE	High	Master Protein	O75165	DnaJ homolog subfamily C member 13 OS=Homo sapiens OX=9606 GN=DNAJC13 PE=1 SV=5	0	FALSE	149.057	20	34	256	34	1	2243	254.3	6.74	4924	322.25	30	23	cell differentiation;cell organization and biogenesis;regulation of biological process;transport	cytosol;endosome;membrane	protein binding	Pf00226, Pf14237	23317	ENSG00000138246.15	DNAJC13	3				0	102.1	134.2	73.7	230.5	86.6	114.2	89.3	71.4	148	200.6	121.1	115.8	51.6	68.1	110.7	107.4	37.5	75.8
TRUE	High	Master Protein	P17174	Aspartate aminotransferase, cytoplasmic OS=Homo sapiens OX=9606 GN=GOT1 PE=1 SV=3	0	FALSE	148.989	63	19	282	19	1	413	46.2	7.01	5222	378.11	19	18	metabolic process;regulation of biological process;response to stimulus	cytoplasm;cytosol;mitochondrion;nucleus;vacuole	catalytic activity	Pf00155	2805	ENSG00000120053.10	GOT1	10	hsa00330; hsa01210; hsa00250; hsa00220; hsa00270; hsa01230; hsa01200; hsa00400; hsa01100; hsa00360; hsa00350	Arginine and proline metabolism; 2-Oxocarboxylic acid metabolism; Alanine, aspartate and glutamate metabolism; Arginine biosynthesis; Cysteine and methionine metabolism; Biosynthesis of amino acids; Carbon metabolism; Phenylalanine, tyrosine and tryptophan biosynthesis; Metabolic pathways; Phenylalanine metabolism; Tyrosine metabolism	Glycolysis and Gluconeogenesis; Amino Acid metabolism; Trans-sulfuration pathway; Alanine and aspartate metabolism	0	89.8	64.8	30.4	124.7	86.6	81.8	47.8	188.5	66.3	118	51.5	67.1	51.1	32.3	68.8	117.7	27.4	60.7
TRUE	High	Master Protein	P39060	Collagen alpha-1(XVIII) chain OS=Homo sapiens OX=9606 GN=COL18A1 PE=1 SV=5	0	FALSE	147.948	16	19	297	19	1	1754	178.1	6.01	4793	431.83	19	17	cell organization and biogenesis;metabolic process;regulation of biological process;response to stimulus	extracellular;organelle lumen	metal ion binding;protein binding;structural molecule activity	Pf01391, Pf01392, Pf06121, Pf06482, Pf13385	80781	ENSG00000182871.14	COL18A1	21	hsa04974	Protein digestion and absorption		0	60.2	55.7	53.3	51.2	48.8	69.3	126.4	105.4	40.6	29.5	58	57.6	176.4	90.4	64.2	234.8	51	37.1
TRUE	High	Master Protein	P35232	Prohibitin OS=Homo sapiens OX=9606 GN=PHB PE=1 SV=1	0	FALSE	147.843	79	17	608	17	1	272	29.8	5.76	12542	982.11	17	17	cell differentiation;cell organization and biogenesis;metabolic process;regulation of biological process;response to stimulus;transport	cell surface;cytoplasm;endosome;membrane;mitochondrion;nucleus	DNA binding;protein binding	Pf01145	5245	ENSG00000167085.11	PHB	17			Integrated Breast Cancer Pathway	0	166.1	105.8	71.1	170.2	90.1	172.5	66.9	74.1	59.6	88.7	58.8	77.5	62.1	42.9	105	169	104	40.4
TRUE	High	Master Protein	P05787	Keratin, type II cytoskeletal 8 OS=Homo sapiens OX=9606 GN=KRT8 PE=1 SV=7	0	TRUE	147.406	60	30	284	22	1	483	53.7	5.59	4933	368.2	30	28	cell death;cell differentiation;cell organization and biogenesis;regulation of biological process;response to stimulus	cytoplasm;cytoskeleton;cytosol;membrane;nucleus	catalytic activity;motor activity;protein binding;structural molecule activity	Pf00038, Pf01576, Pf13166, Pf15003	3856	ENSG00000170421.12	KRT8	12			Primary Focal Segmental Glomerulosclerosis FSGS	3	7.4	8.4	27.6	25.5	8.6	897.5	18.5	23.2	16.2	16.7	12	770.3	27.5	105.1	33.3	20.7	68.2	12.7
TRUE	High	Master Protein	P63241	Eukaryotic translation initiation factor 5A-1 OS=Homo sapiens OX=9606 GN=EIF5A PE=1 SV=2	0	FALSE	147.295	66	13	593	13	1	154	16.8	5.24	14201	1167.26	13	11	cell death;cellular homeostasis;metabolic process;regulation of biological process;response to stimulus;transport	cytoplasm;cytosol;endoplasmic reticulum;membrane;nucleus	protein binding;RNA binding	Pf01287	1984	ENSG00000132507.17	EIF5A	17			eIF5A regulation in response to inhibition of the nuclear export system; Translation Factors	0	200.5	154.4	106.5	247	93.2	167.9	68.8	68.9	133.4	127.6	129.2	41.3	119.3	46	132.8	101.2	70.2	66.5
TRUE	High	Master Protein	P21796	Voltage-dependent anion-selective channel protein 1 OS=Homo sapiens OX=9606 GN=VDAC1 PE=1 SV=2	0	FALSE	146.735	76	16	846	15	1	283	30.8	8.54	19924	1196.35	16	15	cell communication;cell death;cell differentiation;defense response;metabolic process;regulation of biological process;response to stimulus;transport	membrane;mitochondrion;nucleus	protein binding;transporter activity	Pf01459	7416	ENSG00000213585.10	VDAC1	5	hsa05016; hsa05164; hsa04621; hsa05166; hsa04022; hsa04020; hsa05012	Huntington's disease; Influenza A; NOD-like receptor signaling pathway; HTLV-I infection; cGMP-PKG signaling pathway; Calcium signaling pathway; Parkinson's disease		1	134.5	130.3	62.4	143.9	97.4	120.8	186.5	109.3	64.7	88.4	61.5	86.4	46.4	49.4	88.5	189.7	68.4	50.9
TRUE	High	Master Protein	P27708	CAD protein OS=Homo sapiens OX=9606 GN=CAD PE=1 SV=3	0	FALSE	146.438	22	31	142	30	1	2225	242.8	6.46	2230	188.25	27	23	metabolic process	cytoplasm;cytosol;membrane;nucleus	catalytic activity;metal ion binding;nucleotide binding;protein binding	Pf00117, Pf00185, Pf00289, Pf00988, Pf01979, Pf02142, Pf02222, Pf02729, Pf02786, Pf02787, Pf07478, Pf07722, Pf13147, Pf13535, Pf13594, Pf15632	790	ENSG00000084774.13	CAD	2	hsa01100; hsa00240; hsa00250	Metabolic pathways; Pyrimidine metabolism; Alanine, aspartate and glutamate metabolism	Endothelin Pathways; Amino Acid metabolism	1	111	125.2	105.7	117	41.1	85.3	25.4	23.5	68.4	58.2	62.7	84.9	77.3	37.5	156.8	128.6	132.7	53.6
TRUE	High	Master Protein	Q709C8	Vacuolar protein sorting-associated protein 13C OS=Homo sapiens OX=9606 GN=VPS13C PE=1 SV=1	0	FALSE	146.007	15	41	184	41	1	3753	422.1	6.83	2492	228.26	33	31	cell organization and biogenesis;transport	cytoplasm;cytosol;membrane;mitochondrion		Pf06650, Pf12624	54832	ENSG00000129003.15	VPS13C	15				0	116.9	131.3	79.1	247.6	75	104.1	80.7	112.1	114.2	70.8	201.3	132.3	52.3	52.6	162.5	131.9	62.7	54.9
TRUE	High	Master Protein	P38606	V-type proton ATPase catalytic subunit A OS=Homo sapiens OX=9606 GN=ATP6V1A PE=1 SV=2	0	FALSE	145.886	54	26	363	26	1	617	68.3	5.52	6615	514.6	24	22	cellular homeostasis;metabolic process;regulation of biological process;response to stimulus;transport	cytosol;membrane;mitochondrion	catalytic activity;nucleotide binding;transporter activity	Pf00006, Pf00306, Pf02874	523	ENSG00000114573.9	ATP6V1A	3	hsa04966; hsa04150; hsa05323; hsa01100; hsa00190; hsa04145; hsa04721; hsa05120; hsa05110	Collecting duct acid secretion; mTOR signaling pathway; Rheumatoid arthritis; Metabolic pathways; Oxidative phosphorylation; Phagosome; Synaptic vesicle cycle; Epithelial cell signaling in Helicobacter pylori infection; Vibrio cholerae infection		0	54.8	96.1	133.6	126.7	87.6	74.2	52.5	82.5	59.8	86.6	101.1	151.7	50.2	75.2	56.9	177.2	34.5	49.5
TRUE	High	Master Protein	Q9BUJ2	Heterogeneous nuclear ribonucleoprotein U-like protein 1 OS=Homo sapiens OX=9606 GN=HNRNPUL1 PE=1 SV=2	0	FALSE	145.652	35	22	218	22	1	856	95.7	6.92	3257	376.56	22	20	metabolic process;regulation of biological process;response to stimulus	nucleus	protein binding;RNA binding	Pf00622, Pf02037, Pf13671	11100	ENSG00000105323.16	HNRNPUL1	19	hsa05164	Influenza A		0	153.7	119.9	52.8	148.7	56.8	140.2	84.3	63	93.5	108.2	100.2	81.8	94.8	39.8	145.6	115.1	72.2	49.9
TRUE	High	Master Protein	Q3SY69	Mitochondrial 10-formyltetrahydrofolate dehydrogenase OS=Homo sapiens OX=9606 GN=ALDH1L2 PE=1 SV=2	0	FALSE	145.17	41	27	182	21	1	923	101.7	6.52	3401	267	25	23	metabolic process	cytoplasm;mitochondrion;organelle lumen	catalytic activity	Pf00171, Pf00550, Pf00551, Pf02911	160428	ENSG00000136010.13	ALDH1L2	12	hsa00670	One carbon pool by folate		6	124.6	90.5	293.1	79.2	63.7	154	41	33.1	62.9	119.4	70.7	73.7	119.4	161.1	116.6	70.5	100.9	67
TRUE	High	Master Protein	J3KN67	Tropomyosin alpha-3 chain OS=Homo sapiens OX=9606 GN=TPM3 PE=1 SV=1	0	FALSE	145.122	57	24	422	1	1	285	33.2	4.77		1445.55		24	cell organization and biogenesis;cellular component movement	cytoskeleton;cytosol	protein binding;structural molecule activity	Pf00261, Pf12718	7170	ENSG00000143549.19	TPM3	1			Striated Muscle Contraction	3	153.2	116.1	9.5	148.1	112	58.8	96.2	48.7	136.5	230.8	116	231	124.3	125.1	69.5	195.3	125.3	53
TRUE	High	Master Protein	P54136	Arginine--tRNA ligase, cytoplasmic OS=Homo sapiens OX=9606 GN=RARS PE=1 SV=2	0	FALSE	145.106	47	27	282	27	1	660	75.3	6.68	4316	368.88	27	25	metabolic process	cytoplasm;cytosol;membrane;mitochondrion;nucleus	catalytic activity;nucleotide binding;protein binding;RNA binding	Pf00750, Pf03485, Pf05746	5917	ENSG00000113643.8	RARS	5	hsa00970	Aminoacyl-tRNA biosynthesis	Amino Acid metabolism	0	98.4	107.3	51.9	186.1	74.4	125.7	100.1	79.8	90.7	166.7	126.2	83.9	63.4	56.7	108.7	170.3	98.8	65.8
TRUE	High	Master Protein	P50991	T-complex protein 1 subunit delta OS=Homo sapiens OX=9606 GN=CCT4 PE=1 SV=4	0	FALSE	144.854	58	23	535	22	1	539	57.9	7.83	9309	683.85	22	21	metabolic process;regulation of biological process;transport	cytoplasm;cytoskeleton;cytosol	nucleotide binding;protein binding;RNA binding	Pf00118	10575	ENSG00000115484.14	CCT4	2				0	91	109.8	70.6	95.7	72.8	75.3	67.6	95	72.7	77.4	83.4	77.4	73	54.1	107.4	164.1	136.7	54.9
TRUE	High	Master Protein	Q9UDY2	Tight junction protein ZO-2 OS=Homo sapiens OX=9606 GN=TJP2 PE=1 SV=2	0	FALSE	144.713	26	24	173	24	1	1190	133.9	7.4	2552	255.64	24	21	metabolic process;regulation of biological process;response to stimulus;transport	cytosol;membrane;nucleus	catalytic activity;protein binding	Pf00595, Pf00625, Pf07653, Pf13180	9414	ENSG00000119139.17	TJP2	9	hsa05110; hsa04530	Vibrio cholerae infection; Tight junction		0	410	252.5	63.6	234.4	74.1	98.8	75.2	75.2	153.7	104.1	113.9	71.2	48.8	23.4	88	85.9	35	33.7
TRUE	High	Master Protein	Q7L576	Cytoplasmic FMR1-interacting protein 1 OS=Homo sapiens OX=9606 GN=CYFIP1 PE=1 SV=1	0	FALSE	144.512	25	26	322	6	1	1253	145.1	6.9	5740	397.98	25	23	cell differentiation;cell growth;cell organization and biogenesis;development;regulation of biological process;response to stimulus;transport	cytoplasm;cytosol;extracellular;organelle lumen	protein binding;RNA binding	Pf05994, Pf07159	23191	ENSG00000273749.4	CYFIP1	15	hsa04810; hsa03013	Regulation of actin cytoskeleton; RNA transport	G13 Signaling Pathway; Brain-Derived Neurotrophic Factor (BDNF) signaling pathway	20	59.9	72.5	60.7	131.9	57.5	69.4	33.4	37.9	60.3	103.1	73.9	56.4	32.9	29.9	86.1	190	36.2	48.9
TRUE	High	Master Protein	Q9NYL9	Tropomodulin-3 OS=Homo sapiens OX=9606 GN=TMOD3 PE=1 SV=1	0	FALSE	144.453	75	19	329	18	1	352	39.6	5.19	6008	557.65	18	19	cell organization and biogenesis;regulation of biological process	cytoplasm;cytoskeleton	protein binding	Pf03250	29766	ENSG00000138594.13	TMOD3	15				0	189.7	213.8	139.4	115.8	119.5	82.7	52.3	102.1	154.3	153.5	230.1	114.5	78.5	59.4	205.8	58.4	140.3	60.4
TRUE	High	Master Protein	P40926	Malate dehydrogenase, mitochondrial OS=Homo sapiens OX=9606 GN=MDH2 PE=1 SV=3	0	FALSE	144.319	62	17	933	17	1	338	35.5	8.68	20600	1407.2	16	17	metabolic process	membrane;mitochondrion;nucleus;organelle lumen	catalytic activity;nucleotide binding;protein binding;RNA binding	Pf00056, Pf01073, Pf01118, Pf02866, Pf13460	4191	ENSG00000146701.11	MDH2	7	hsa00630; hsa00620; hsa00270; hsa01200; hsa01100; hsa00020	Glyoxylate and dicarboxylate metabolism; Pyruvate metabolism; Cysteine and methionine metabolism; Carbon metabolism; Metabolic pathways; Citrate cycle (TCA cycle)	Glycolysis and Gluconeogenesis; Amino Acid metabolism; TCA Cycle	0	176.2	130.4	79.6	216.1	92	108.1	73.6	74.5	68.7	86.1	80.1	106.2	88	42	131.4	221.7	88.3	57.2
TRUE	High	Master Protein	H7BYY1	Tropomyosin 1 (Alpha), isoform CRA_m OS=Homo sapiens OX=9606 GN=TPM1 PE=1 SV=1	0	FALSE	144.075	66	24	364	1	1	248	28.7	4.82		1182.97		24	cell organization and biogenesis;cellular component movement;regulation of biological process;response to stimulus	cytoskeleton;cytosol	protein binding;structural molecule activity	Pf00261, Pf12718	7168	ENSG00000140416.19	TPM1	15			Striated Muscle Contraction	0	246.9	190.6	37.3	102.8	28.4	112.4	14.3	44.5	2.3	91.9	3.6	18.3	495.4	112.9	25.9	7.4	104.6	39.8
TRUE	High	Master Protein	Q15019	Septin-2 OS=Homo sapiens OX=9606 GN=SEPT2 PE=1 SV=1	0	FALSE	143.939	58	14	620	14	1	361	41.5	6.6	14363	1043.9	13	14	cell differentiation;cell division;cell organization and biogenesis;regulation of biological process;response to stimulus	chromosome;cytoplasm;cytoskeleton;cytosol;membrane;nucleus	nucleotide binding;protein binding	Pf00071, Pf00735, Pf01926	4735	ENSG00000168385.17	SEPT2	2	hsa05100	Bacterial invasion of epithelial cells		0	203.6	165.7	90	184.5	108.9	202.1	121.1	75.7	137.9	155.1	113.3	39.3	141.7	70.3	93.3	112.9	75.9	64.2
TRUE	High	Master Protein	P24752	Acetyl-CoA acetyltransferase, mitochondrial OS=Homo sapiens OX=9606 GN=ACAT1 PE=1 SV=1	0	FALSE	143.696	57	19	538	19	1	427	45.2	8.85	9644	919.41	19	19	cell organization and biogenesis;metabolic process;response to stimulus	membrane;mitochondrion;organelle lumen	catalytic activity;metal ion binding;protein binding	Pf00108, Pf00109, Pf02803	38	ENSG00000075239.13	ACAT1	11	hsa01200; hsa00650; hsa00380; hsa00900; hsa00310; hsa00071; hsa01212; hsa00630; hsa00072; hsa00280; hsa01100; hsa00620; hsa00640	Carbon metabolism; Butanoate metabolism; Tryptophan metabolism; Terpenoid backbone biosynthesis; Lysine degradation; Fatty acid degradation; Fatty acid metabolism; Glyoxylate and dicarboxylate metabolism; Synthesis and degradation of ketone bodies; Valine, leucine and isoleucine degradation; Metabolic pathways; Pyruvate metabolism; Propanoate metabolism	Tryptophan metabolism; Fatty Acid Beta Oxidation; Synthesis and Degradation of Ketone Bodies	0	154.5	121.5	143.8	222	73.6	75.7	65.5	51.2	86.4	111.6	66.1	52.6	57.5	42.2	77.6	57.5	107.7	49.1
TRUE	High	Master Protein	P58107	Epiplakin OS=Homo sapiens OX=9606 GN=EPPK1 PE=1 SV=3	0	FALSE	143.459	20	17	224	9	1	5088	555.3	5.62	5247	356.2	15	14												0	122	466.5	20.7	103.4	156.1	74.2	12.6	272.7	34.2	130	299.2	33.4	62.5	23.7	74.8	273	196.2	38.1
TRUE	High	Master Protein	P05783	Keratin, type I cytoskeletal 18 OS=Homo sapiens OX=9606 GN=KRT18 PE=1 SV=2	0	FALSE	143.293	60	22	204	20	1	430	48	5.45	4118	317.27	21	21	cell death;cell organization and biogenesis;regulation of biological process;response to stimulus;transport	cytoplasm;cytosol;nucleus	protein binding;RNA binding;structural molecule activity	Pf00038	3875	ENSG00000111057.10	KRT18	12	hsa05130	Pathogenic Escherichia coli infection	Pathogenic Escherichia coli infection	1	36.2	42.6	49.9	82.8	74	679	73.6	195.5	40.5	51.7	68.9	305	39.3	17.2	165.1	31.6	93.1	31.4
TRUE	High	Master Protein	Q08431	Lactadherin OS=Homo sapiens OX=9606 GN=MFGE8 PE=1 SV=2	0	FALSE	143.005	65	18	165	18	1	387	43.1	8.15	3141	218.13	18	14	cell organization and biogenesis;metabolic process;regulation of biological process	extracellular;membrane;organelle lumen	protein binding	Pf00008, Pf00754	4240		MFGE8	15			Extracellular vesicle-mediated signaling in recipient cells	0	169.7	63.6	46.1	102.3	66.9	51.7	50.5	45.5	51	70.3	17.4	26.5	120.4	187.4	27.3	35.7	104.2	120.6
TRUE	High	Master Protein	Q01105	Protein SET OS=Homo sapiens OX=9606 GN=SET PE=1 SV=3	0	FALSE	143.002	46	11	437	6	1	290	33.5	4.32	7164	965.48	11	11	cell organization and biogenesis;metabolic process;regulation of biological process;transport	cytoplasm;cytosol;endoplasmic reticulum;nucleus	DNA binding;enzyme regulator activity;protein binding	Pf00956	6418	ENSG00000119335.16	SET	9			Histone Modifications	5	92.5	275.5	99.2	271.2	97.6	132.2	62	76.6	115.5	318.3	60	53.7	24.9	21.9	85.3	66.4	91.3	24.9
TRUE	High	Master Protein	P00739	Haptoglobin-related protein OS=Homo sapiens OX=9606 GN=HPR PE=2 SV=2	0	FALSE	142.362	52	19	482	5	1	348	39	7.09	9744	655.76	18	16	metabolic process;transport	extracellular	catalytic activity;protein binding	Pf00089	3250	ENSG00000261701.6	HPR	16	hsa05143	African trypanosomiasis		0	22.2	32.7	10.7	85.7	45	60.2	55.1	25.2	30.5	43.7	99.5	78.7	75.4	36.7	16.5	33.9	18.4	571.4
TRUE	High	Master Protein	Q92900	Regulator of nonsense transcripts 1 OS=Homo sapiens OX=9606 GN=UPF1 PE=1 SV=2	0	FALSE	142.279	31	25	173	25	1	1129	124.3	6.61	2607	235.43	23	22	cell organization and biogenesis;cellular homeostasis;metabolic process;regulation of biological process;response to stimulus;transport	chromosome;cytoplasm;cytosol;nucleus;spliceosomal complex	catalytic activity;DNA binding;metal ion binding;nucleotide binding;protein binding;RNA binding	Pf04851, Pf09416, Pf13086, Pf13087, Pf13245, Pf13604	5976	ENSG00000005007.12	UPF1	19	hsa03015; hsa03013	mRNA surveillance pathway; RNA transport		0	127.8	156.1	68.9	122.8	102.3	125.1	86.5	76	65.5	109.5	90	65.3	52.5	33	74.2	95.2	202.3	29.6
TRUE	High	Master Protein	P08123	Collagen alpha-2(I) chain OS=Homo sapiens OX=9606 GN=COL1A2 PE=1 SV=7	0	FALSE	142.19	25	22	519	22	1	1366	129.2	8.95	12302	1290.77	18	18	cell organization and biogenesis;cellular component movement;coagulation;metabolic process;regulation of biological process;response to stimulus	endoplasmic reticulum;extracellular;organelle lumen	metal ion binding;protein binding;structural molecule activity	Pf01391, Pf01410	1278	ENSG00000164692.17	COL1A2	7	hsa04510; hsa05146; hsa04151; hsa04933; hsa04512; hsa04974; hsa04611	Focal adhesion; Amoebiasis; PI3K-Akt signaling pathway; AGE-RAGE signaling pathway in diabetic complications; ECM-receptor interaction; Protein digestion and absorption; Platelet activation	miRNA targets in ECM and membrane receptors; TGF-beta Signaling Pathway; Focal Adhesion-PI3K-Akt-mTOR-signaling pathway; Inflammatory Response Pathway; Focal Adhesion	0	110.3	47.8	449.9	23.5	45	22.1	49.3	27.6	36	148.1	84.6	89.6	191.6	64	58.4	21.4	39.9	94.7
TRUE	High	Master Protein	Q9P2R3	Rabankyrin-5 OS=Homo sapiens OX=9606 GN=ANKFY1 PE=1 SV=2	0	FALSE	141.925	27	19	188	19	1	1169	128.3	6.1	3880	337.87	18	17	cell organization and biogenesis;regulation of biological process;transport	cytoplasm;cytosol;endosome;membrane	metal ion binding;protein binding	Pf00023, Pf00651, Pf01363, Pf07707, Pf12796, Pf13606, Pf13637, Pf13857	51479	ENSG00000185722.16	ANKFY1	17				0	109	91.7	40.7	81.5	57.5	50.5	34.1	39.5	48.1	53.3	62.6	51.7	29.9	14.4	50.1	68.8	64.4	44.9
TRUE	High	Master Protein	P51858	Hepatoma-derived growth factor OS=Homo sapiens OX=9606 GN=HDGF PE=1 SV=1	0	FALSE	141.913	64	16	289	14	1	240	26.8	4.73	4558	562.57	16	16	cell proliferation;metabolic process;regulation of biological process;response to stimulus	cytoplasm;extracellular;nucleus	DNA binding;nucleotide binding;protein binding;RNA binding	Pf00855	3068	ENSG00000143321.18	HDGF	1				2	425.7	190.9	40	169.1	143.5	92.4	36.6	48.7	113.2	142.4	34.6	68.9	68.7	49	71.7	125.8	132.8	41.1
TRUE	High	Master Protein	Q9Y6R1	Electrogenic sodium bicarbonate cotransporter 1 OS=Homo sapiens OX=9606 GN=SLC4A4 PE=1 SV=1	0	FALSE	141.912	26	22	280	21	1	1079	121.4	6.8	5175	414.26	21	18	cellular homeostasis;transport	membrane	protein binding;transporter activity	Pf00359, Pf00955, Pf03606, Pf07565	8671	ENSG00000080493.15	SLC4A4	4	hsa04976; hsa04964; hsa04972	Bile secretion; Proximal tubule bicarbonate reclamation; Pancreatic secretion		1	62.2	237	55.5	223.2	172.4	72.4	92.3	146	58.8	92.5	170	18.8	44.5	5.3	180.3	57.6	51.8	36.4
TRUE	High	Master Protein	P62195	26S proteasome regulatory subunit 8 OS=Homo sapiens OX=9606 GN=PSMC5 PE=1 SV=1	0	FALSE	141.894	59	22	192	21	1	406	45.6	7.55	3090	267.86	20	17	metabolic process;regulation of biological process;response to stimulus;transport	cytoplasm;cytosol;membrane;nucleus;proteasome	catalytic activity;nucleotide binding;protein binding;RNA binding	Pf00004, Pf00910, Pf01057, Pf01078, Pf05496, Pf06068, Pf06414, Pf07724, Pf07726, Pf07728, Pf13191, Pf13207, Pf13401	5705	ENSG00000087191.12	PSMC5	17	hsa05169; hsa03050	Epstein-Barr virus infection; Proteasome	Parkin-Ubiquitin Proteasomal System pathway; Proteasome Degradation	1	152.3	149.7	84.1	157.5	105.1	103.8	63	70.7	77.9	148.1	69.4	73.5	97.3	45.7	166.9	180.5	185.5	66.3
TRUE	High	Master Protein	Q99460	26S proteasome non-ATPase regulatory subunit 1 OS=Homo sapiens OX=9606 GN=PSMD1 PE=1 SV=2	0	FALSE	141.818	41	26	181	26	1	953	105.8	5.39	2588	254.88	21	25	metabolic process;regulation of biological process;response to stimulus;transport	cytosol;extracellular;membrane;nucleus;organelle lumen;proteasome	catalytic activity;enzyme regulator activity;protein binding	Pf01851, Pf13513, Pf13646	5707	ENSG00000173692.12	PSMD1	2	hsa05169; hsa03050	Epstein-Barr virus infection; Proteasome	Parkin-Ubiquitin Proteasomal System pathway; Proteasome Degradation	0	154.1	263	150.5	211.1	67.6	132.7	38.2	80.6	71.9	65.2	119.7	147.1	60.7	47.9	117	117.7	109.2	75.9
TRUE	High	Master Protein	P48163	NADP-dependent malic enzyme OS=Homo sapiens OX=9606 GN=ME1 PE=1 SV=1	0	FALSE	141.703	59	18	234	18	1	572	64.1	6.13	5391	399.56	18	16	cell organization and biogenesis;metabolic process;regulation of biological process;response to stimulus	cytoplasm;cytosol;mitochondrion	catalytic activity;metal ion binding;nucleotide binding	Pf00390, Pf03949	4199	ENSG00000065833.8	ME1	6	hsa00620; hsa01200; hsa01100; hsa03320	Pyruvate metabolism; Carbon metabolism; Metabolic pathways; PPAR signaling pathway	PPAR signaling pathway; NRF2 pathway	0	8	107.9	95.7	71.6	36.9	58.5	88.4	77.9	166.3	25	217.3	18.5	11.3	331.4	10	59.1	98.1	9.8
TRUE	High	Master Protein	Q9BZF9	Uveal autoantigen with coiled-coil domains and ankyrin repeats OS=Homo sapiens OX=9606 GN=UACA PE=1 SV=2	0	FALSE	141.36	24	25	127	25	1	1416	162.4	7.03	2301	245.77	23	21	metabolic process;regulation of biological process;response to stimulus	cytoplasm;cytoskeleton;cytosol;extracellular;nucleus	protein binding	Pf00023, Pf04111, Pf07888, Pf09726, Pf10174, Pf12128, Pf12796, Pf13606, Pf13637, Pf13857	55075	ENSG00000137831.14	UACA	15				0	58.1	226	40.5	83.6	105	54	83.7	94.3	113	52.3	147.2	65.1	115.1	14.3	94.6	363.7	88.6	103.8
TRUE	High	Master Protein	P00918	Carbonic anhydrase 2 OS=Homo sapiens OX=9606 GN=CA2 PE=1 SV=2	0	FALSE	141.238	81	15	410	15	1	260	29.2	7.4	8505	665.12	15	13	cellular homeostasis;metabolic process;regulation of biological process;response to stimulus;transport	cytoplasm;cytosol;membrane	catalytic activity;metal ion binding;protein binding	Pf00194	760	ENSG00000104267.9	CA2	8	hsa00910; hsa04964; hsa04971; hsa04976; hsa04966; hsa04972	Nitrogen metabolism; Proximal tubule bicarbonate reclamation; Gastric acid secretion; Bile secretion; Collecting duct acid secretion; Pancreatic secretion		0	11.7	23.8	77.9	45.4	99.8	42.5	58.8	77.1	21.7	31.3	178.5	103.8	28.3	75.8	61.5	67.1	118.8	69.1
TRUE	High	Master Protein	Q9UM54	Unconventional myosin-VI OS=Homo sapiens OX=9606 GN=MYO6 PE=1 SV=4	0	FALSE	141.083	26	28	143	2	1	1294	149.6	8.53	2071	233.9	28	26	cellular component movement;regulation of biological process;response to stimulus;transport	cytoplasm;cytosol;Golgi;membrane;nucleus	catalytic activity;motor activity;nucleotide binding;protein binding	Pf00063, Pf00529	4646		MYO6	6			VEGFA-VEGFR2 Signaling Pathway	24	35.3	162.7	106.6	109.5	59.5	51.8	256.4	201.7	155.3	83.2	76.6	72.9	108.4	374.7	51.9	53.6	111.8	53
TRUE	High	Master Protein	Q15029	116 kDa U5 small nuclear ribonucleoprotein component OS=Homo sapiens OX=9606 GN=EFTUD2 PE=1 SV=1	0	FALSE	140.762	38	28	228	27	1	972	109.4	5	3709	282.38	28	21	cell organization and biogenesis;metabolic process;response to stimulus	cytosol;membrane;nucleus;spliceosomal complex	catalytic activity;nucleotide binding;protein binding;RNA binding	Pf00009, Pf00679, Pf03144, Pf03764, Pf14492	9343	ENSG00000108883.12	EFTUD2	17	hsa03040	Spliceosome	mRNA Processing	0	120.1	124.8	47	142	89.7	98.2	77.9	351.7	115.2	154.1	69.2	41.3	65.2	34.8	87.9	103.8	57.4	40.9
TRUE	High	Master Protein	P23526	Adenosylhomocysteinase OS=Homo sapiens OX=9606 GN=AHCY PE=1 SV=4	0	FALSE	140.693	40	19	560	17	1	432	47.7	6.34	11989	802.59	17	18	defense response;metabolic process;response to stimulus;transport	cytoplasm;cytosol;nucleus	catalytic activity;nucleotide binding;protein binding	Pf00670, Pf02254, Pf02826, Pf05221	191	ENSG00000101444.12	AHCY	20	hsa00270; hsa01100	Cysteine and methionine metabolism; Metabolic pathways	Trans-sulfuration pathway; Folate Metabolism; Trans-sulfuration and one carbon metabolism; One Carbon Metabolism	0	72.2	93.5	59.9	97.3	67.9	82.1	42.7	38	78.6	72.1	46.1	61.7	58.4	36.6	161.7	94.6	94.1	29.9
TRUE	High	Master Protein	Q14194	Dihydropyrimidinase-related protein 1 OS=Homo sapiens OX=9606 GN=CRMP1 PE=1 SV=1	0	FALSE	140.675	61	21	343	18	1	572	62.1	7.03	5612	502.36	19	19	cell organization and biogenesis;cellular component movement;metabolic process;regulation of biological process	cytoplasm;cytoskeleton;cytosol	catalytic activity;protein binding	Pf01979, Pf07969, Pf13147, Pf13594	1400	ENSG00000072832.14	CRMP1	4				0	327.1	24.9	24.3	7.2	266.4	46	24.6	25.3	77.8	40.1	27.7	123.2	59.2	29.8	51.4	105.5	33.3	26.3
TRUE	High	Master Protein	Q96HC4	PDZ and LIM domain protein 5 OS=Homo sapiens OX=9606 GN=PDLIM5 PE=1 SV=5	0	FALSE	140.555	43	19	252	19	1	596	63.9	8.21	4224	360.01	18	17	cell growth;regulation of biological process	cytoplasm;cytoskeleton;cytosol;membrane	metal ion binding;protein binding	Pf00412, Pf00595, Pf13180	10611	ENSG00000163110.14	PDLIM5	4				0	127.3	73.4	31.3	186.1	58.4	144.6	68.3	63.7	147.9	103.8	62.9	66.7	196.6	70.9	115.8	164.6	36.6	196.6
TRUE	High	Master Protein	P51178	1-phosphatidylinositol 4,5-bisphosphate phosphodiesterase delta-1 OS=Homo sapiens OX=9606 GN=PLCD1 PE=1 SV=2	0	FALSE	140.404	41	19	228	19	1	756	85.6	6.7	4249	350.6	19	19	metabolic process;regulation of biological process;response to stimulus	cytoplasm;cytosol;membrane	catalytic activity;metal ion binding;protein binding;signal transducer activity	Pf00168, Pf00169, Pf00387, Pf00388, Pf09279, Pf14788	5333	ENSG00000187091.13	PLCD1	3	hsa04020; hsa04070; hsa00562; hsa01100; hsa04933; hsa04919	Calcium signaling pathway; Phosphatidylinositol signaling system; Inositol phosphate metabolism; Metabolic pathways; AGE-RAGE signaling pathway in diabetic complications; Thyroid hormone signaling pathway	GPR40 PATHWAY; Myometrial Relaxation and Contraction Pathways	0	160.7	97.2	70.2	116	81.4	68.4	63.6	81.3	176.2	115.8	92.8	16	51.7	61	88.5	202.5	35.1	46.2
TRUE	High	Master Protein	Q96NY7	Chloride intracellular channel protein 6 OS=Homo sapiens OX=9606 GN=CLIC6 PE=2 SV=3	0	FALSE	140.375	33	13	124	11	1	704	73	4.37	2499	264.87	13	12	metabolic process;regulation of biological process;transport	cytoplasm;membrane;nucleus	catalytic activity;protein binding;transporter activity	Pf00043, Pf13409, Pf13410, Pf13417, Pf14497	54102	ENSG00000159212.12	CLIC6	21				2	133.6	194.6	134.2	231.5	255.6	118.4	141.8	89.6	204.5	89	118.2	42.3	35.8	28.4	106.1	36.4	74.4	17.7
TRUE	High	Master Protein	Q93008	Probable ubiquitin carboxyl-terminal hydrolase FAF-X OS=Homo sapiens OX=9606 GN=USP9X PE=1 SV=3	0	FALSE	140.238	14	31	173	31	1	2570	292.1	5.8	2775	202.68	31	23	cell division;cell growth;cellular component movement;metabolic process;regulation of biological process;response to stimulus	cytoplasm;cytosol;membrane	catalytic activity;protein binding	Pf00443, Pf09606, Pf13423	8239	ENSG00000124486.12	USP9X	X				0	87	72.2	44.5	131.8	66.7	143.3	38.8	49	70.2	83.5	63.8	108	55.8	26	111.8	209.2	63.9	65.8
TRUE	High	Master Protein	O14980	Exportin-1 OS=Homo sapiens OX=9606 GN=XPO1 PE=1 SV=1	0	FALSE	140.163	33	26	301	26	1	1071	123.3	6.06	5185	466.57	25	21	cell organization and biogenesis;regulation of biological process;response to stimulus;transport	chromosome;cytoplasm;cytosol;membrane;nucleus	protein binding;RNA binding;transporter activity	Pf03810, Pf08389, Pf08767	7514	ENSG00000082898.16	XPO1	2	hsa05166; hsa05169; hsa03013; hsa03008; hsa05164	HTLV-I infection; Epstein-Barr virus infection; RNA transport; Ribosome biogenesis in eukaryotes; Influenza A	eIF5A regulation in response to inhibition of the nuclear export system	0	119.2	134.3	64.2	154.4	82.5	103.4	70	55.2	103.9	100.7	91.7	107.5	58.6	61.9	101.6	280.1	176.9	36.8
TRUE	High	Master Protein	P52209	6-phosphogluconate dehydrogenase, decarboxylating OS=Homo sapiens OX=9606 GN=PGD PE=1 SV=3	0	FALSE	139.751	54	22	414	22	1	483	53.1	7.23	7284	597.73	21	20	metabolic process	cytoplasm;cytosol;nucleus	catalytic activity	Pf00393, Pf03446	5226	ENSG00000142657.20	PGD	1	hsa01100; hsa00480; hsa00030; hsa01200	Metabolic pathways; Glutathione metabolism; Pentose phosphate pathway; Carbon metabolism	Pentose Phosphate Pathway; NRF2 pathway	0	53.5	154.4	121.8	102.4	133.6	92.1	61.9	70.9	149.6	83	127.8	277.8	56.4	37.3	80.8	139	87.5	61.6
TRUE	High	Master Protein	P47897	Glutamine--tRNA ligase OS=Homo sapiens OX=9606 GN=QARS PE=1 SV=1	0	FALSE	139.603	43	23	192	23	1	775	87.7	7.15	3059	287.46	20	21	metabolic process;regulation of biological process	cytoplasm;cytosol;organelle lumen	catalytic activity;enzyme regulator activity;nucleotide binding;protein binding	Pf00749, Pf03950, Pf04557, Pf04558	5859	ENSG00000172053.17	QARS	3	hsa00970; hsa01100	Aminoacyl-tRNA biosynthesis; Metabolic pathways		0	144.2	119.1	69.6	223.6	92.4	169.3	59.2	48.1	94.2	152.9	114.8	91.8	53.9	60.1	85.8	523.4	68.1	64.7
TRUE	High	Master Protein	P26641	Elongation factor 1-gamma OS=Homo sapiens OX=9606 GN=EEF1G PE=1 SV=3	0	FALSE	139.557	55	21	563	21	1	437	50.1	6.67	10892	731.28	21	18	metabolic process;response to stimulus	cytoplasm;cytosol;endoplasmic reticulum;membrane;nucleus	catalytic activity;protein binding;RNA binding	Pf00043, Pf00647, Pf02798, Pf13409, Pf13410, Pf13417, Pf14497	1937	ENSG00000254772.9	EEF1G	11	hsa05134	Legionellosis	Translation Factors	0	144.1	142.1	49.5	259.2	85	126	56.5	69.8	104	227.2	116.1	109.4	66.8	39.9	132.1	105.4	40.3	69.9
TRUE	High	Master Protein	Q14240	Eukaryotic initiation factor 4A-II OS=Homo sapiens OX=9606 GN=EIF4A2 PE=1 SV=2	0	FALSE	139.435	59	22	512	10	1	407	46.4	5.48	9298	762.66	21	21	metabolic process;regulation of biological process	cytosol	catalytic activity;DNA binding;nucleotide binding;protein binding;RNA binding	Pf00270, Pf00271, Pf04851	1974	ENSG00000156976.16	EIF4A2	3	hsa03013	RNA transport	Translation Factors	0	165	181.5	86.6	153	94	129	83.4	99.1	133.9	97.9	94.3	71.5	85.1	24.3	123	194.5	39.5	38
TRUE	High	Master Protein	P49748	Very long-chain specific acyl-CoA dehydrogenase, mitochondrial OS=Homo sapiens OX=9606 GN=ACADVL PE=1 SV=1	0	FALSE	139.377	42	24	386	24	1	655	70.3	8.75	6939	536.03	24	22	cell differentiation;metabolic process;regulation of biological process;response to stimulus	cytosol;membrane;mitochondrion;nucleus;organelle lumen	catalytic activity;nucleotide binding	Pf00441, Pf02770, Pf02771, Pf08028	37	ENSG00000072778.19	ACADVL	17	hsa00071; hsa01100; hsa01212	Fatty acid degradation; Metabolic pathways; Fatty acid metabolism	Mitochondrial LC-Fatty Acid Beta-Oxidation; Fatty Acid Beta Oxidation	0	92.7	71.5	76.8	109.4	32.5	94.2	61	71.5	94	74.4	91.8	258.2	82.9	39.4	66.6	261.4	57.3	48.2
TRUE	High	Master Protein	O60271	C-Jun-amino-terminal kinase-interacting protein 4 OS=Homo sapiens OX=9606 GN=SPAG9 PE=1 SV=4	0	FALSE	139.302	28	21	189	3	1	1321	146.1	5.15	3326	318.01	21	18	cell differentiation;cell organization and biogenesis;regulation of biological process;transport	cytoplasm;cytosol	protein binding;structural molecule activity	Pf09744	9043	ENSG00000008294.20	SPAG9	17				17	179	180.9	64.3	222.9	121.9	161.3	100.2	137.6	103.9	217.6	117.7	29.8	71.5	20.4	89.3	64.1	31.6	29
TRUE	High	Master Protein	P04792	Heat shock protein beta-1 OS=Homo sapiens OX=9606 GN=HSPB1 PE=1 SV=2	0	FALSE	138.916	82	19	743	19	1	205	22.8	6.4	14334	1294	19	16	cellular component movement;metabolic process;regulation of biological process;response to stimulus	cytoplasm;cytoskeleton;cytosol;membrane;nucleus;proteasome	enzyme regulator activity;protein binding;RNA binding	Pf00011	3315	ENSG00000106211.8	HSPB1	7	hsa04370; hsa04010; hsa05146; hsa05169	VEGF signaling pathway; MAPK signaling pathway; Amoebiasis; Epstein-Barr virus infection	VEGFA-VEGFR2 Signaling Pathway; p38 MAPK Signaling Pathway; Fas Ligand (FasL) pathway and Stress induction of Heat Shock Proteins (HSP) regulation; ATM Signaling Network in Development and Disease; Apoptosis-related network due to altered Notch3 in ovarian cancer; MAPK Signaling Pathway	0	143.6	102.6	79.1	42.8	69.1	110.7	192.5	94.3	164.9	50.9	298.5	58.8	115.5	100.9	103.4	129.9	38.9	53.8
TRUE	High	Master Protein	P17677	Neuromodulin OS=Homo sapiens OX=9606 GN=GAP43 PE=1 SV=1	0	FALSE	138.869	75	13	127	13	1	238	24.8	4.72	2978	371.04	12	12	cell differentiation;cell organization and biogenesis;cellular component movement;development;regulation of biological process;response to stimulus	cytoplasm;membrane	protein binding	Pf00612, Pf10580	2596	ENSG00000172020.12	GAP43	3			Glial Cell Differentiation; Spinal Cord Injury	0	14.4	8.8	17.5	53.9	224.4	15.1	11	21.1	888.7	844	12	9.6	3.6	5.8	4.2	43.7	8.9	28.8
TRUE	High	Master Protein	P11215	Integrin alpha-M OS=Homo sapiens OX=9606 GN=ITGAM PE=1 SV=2	0	FALSE	138.758	29	26	146	25	1	1152	127.1	7.23	3194	202.98	25	22	cell differentiation;cell organization and biogenesis;cellular component movement;regulation of biological process;response to stimulus;transport	cell surface;membrane	metal ion binding;protein binding	Pf00092, Pf00357, Pf01839, Pf08441, Pf13519	3684	ENSG00000169896.16	ITGAM	16	hsa04610; hsa04015; hsa04810; hsa05133; hsa04640; hsa05134; hsa04514; hsa04670; hsa05140; hsa05202; hsa05146; hsa04145; hsa05152; hsa05150	Complement and coagulation cascades; Rap1 signaling pathway; Regulation of actin cytoskeleton; Pertussis; Hematopoietic cell lineage; Legionellosis; Cell adhesion molecules (CAMs); Leukocyte transendothelial migration; Leishmaniasis; Transcriptional misregulation in cancer; Amoebiasis; Phagosome; Tuberculosis; Staphylococcus aureus infection	TYROBP Causal Network; Focal Adhesion; Microglia Pathogen Phagocytosis Pathway; Integrin-mediated Cell Adhesion	1	59.2	43.6	33.1	214.4	54.1	68.1	15.5	29.2	65.3	159.6	77.1	261	36.9	17.6	38.8	115.4	91.4	60.8
TRUE	High	Master Protein	Q06828	Fibromodulin OS=Homo sapiens OX=9606 GN=FMOD PE=1 SV=2	0	FALSE	138.734	39	12	511	12	1	376	43.2	6.04	11431	826.56	12	10	cell organization and biogenesis;metabolic process	extracellular;organelle lumen	protein binding	Pf01462, Pf12799, Pf13855, Pf14580	2331	ENSG00000122176.10	FMOD	1				0	338.5	53	192.2	59.7	30.7	62.7	32.3	38	40.9	37.2	23.9	28.5	285.5	529.7	27.1	11.6	17.2	285
TRUE	High	Master Protein	Q9P2J5	Leucine--tRNA ligase, cytoplasmic OS=Homo sapiens OX=9606 GN=LARS PE=1 SV=2	0	FALSE	138.697	30	28	207	28	1	1176	134.4	7.3	3280	260.23	27	23	cell communication;cell organization and biogenesis;metabolic process;regulation of biological process;response to stimulus;transport	cytoplasm;cytosol;endoplasmic reticulum;vacuole	catalytic activity;enzyme regulator activity;nucleotide binding;protein binding	Pf00133, Pf01406, Pf08264, Pf09334	51520	ENSG00000133706.17	LARS	5	hsa00970	Aminoacyl-tRNA biosynthesis		0	110	111.9	60.7	126.3	87.9	49.5	53.9	44.8	55.6	94.5	131.4	42.2	82.9	46.2	144.8	155	84	91.6
TRUE	High	Master Protein	P62140	Serine/threonine-protein phosphatase PP1-beta catalytic subunit OS=Homo sapiens OX=9606 GN=PPP1CB PE=1 SV=3	0	FALSE	138.548	68	20	423	7	1	327	37.2	6.19	7459	692.59	19	20	cell division;metabolic process;regulation of biological process;response to stimulus	cytoplasm;cytosol;nucleus	catalytic activity;metal ion binding;protein binding	Pf00149	5500	ENSG00000213639.9	PPP1CB	2	hsa04270; hsa03015; hsa04510; hsa04611; hsa04921; hsa05034; hsa05031; hsa04114; hsa04728; hsa05205; hsa04720; hsa04931; hsa04022; hsa04750; hsa04024; hsa05168; hsa04810; hsa04261; hsa04390; hsa04910	Vascular smooth muscle contraction; mRNA surveillance pathway; Focal adhesion; Platelet activation; Oxytocin signaling pathway; Alcoholism; Amphetamine addiction; Oocyte meiosis; Dopaminergic synapse; Proteoglycans in cancer; Long-term potentiation; Insulin resistance; cGMP-PKG signaling pathway; Inflammatory mediator regulation of TRP channels; cAMP signaling pathway; Herpes simplex infection; R…	Common Pathways Underlying Drug Addiction; G13 Signaling Pathway	13	153.3	151	64.9	171.4	103.3	164.8	65.9	60.7	119.3	100.7	79.3	74.9	105.7	62.3	109	98.3	103.3	110.4
TRUE	High	Master Protein	P62805	Histone H4 OS=Homo sapiens OX=9606 GN=HIST1H4A PE=1 SV=2	0	FALSE	138.456	65	16	1220	16	1	103	11.4	11.36	23634	1738.88	16	14	cell organization and biogenesis;metabolic process;regulation of biological process;response to stimulus	chromosome;extracellular;membrane;nucleus	DNA binding;protein binding;RNA binding	Pf00125, Pf02969, Pf15630	8359; 8361; 8360; 8363; 8365; 8364; 121504; 554313; 8367; 8294; 8366; 8370; 8362; 8368	ENSG00000197061.4; ENSG00000275126.1; ENSG00000273542.1; ENSG00000197238.4; ENSG00000197837.3; ENSG00000276966.2; ENSG00000158406.4; ENSG00000270882.2; ENSG00000274618.1; ENSG00000278637.1; ENSG00000277157.1; ENSG00000278705.1; ENSG00000270276.2; ENSG00000276180.1	HIST1H4A; HIST1H4F; HIST1H4D; HIST1H4J; HIST1H4H; HIST1H4C; HIST4H4; HIST2H4B; HIST1H4E; HIST1H4I; HIST1H4B; HIST2H4A; HIST1H4K; HIST1H4L	6; 12; 1	hsa05203; hsa05322; hsa05034	Viral carcinogenesis; Systemic lupus erythematosus; Alcoholism	Gastric Cancer Network 1; Type II interferon signaling (IFNG); Histone Modifications	0	96.5	94.6	102.6	144.6	92.6	131	90	62.2	68.8	217.1	48.2	72.6	111.7	47.5	195.3	75.8	62.1	75
TRUE	High	Master Protein	O94979	Protein transport protein Sec31A OS=Homo sapiens OX=9606 GN=SEC31A PE=1 SV=3	0	FALSE	138.194	27	26	337	26	1	1220	132.9	6.89	5093	489.78	25	21	cell organization and biogenesis;response to stimulus;transport	cytoplasm;cytosol;endoplasmic reticulum;membrane	protein binding	Pf03154, Pf09770, Pf12931	22872	ENSG00000138674.16	SEC31A	4	hsa04141	Protein processing in endoplasmic reticulum	Sterol Regulatory Element-Binding Proteins (SREBP) signalling	0	124.9	122	78.9	147.3	72.9	104.9	154.7	64.6	112.8	159.2	112.2	99.6	44.1	55	79.5	91.4	79.8	23.2
TRUE	High	Master Protein	Q13423	NAD(P) transhydrogenase, mitochondrial OS=Homo sapiens OX=9606 GN=NNT PE=1 SV=3	0	FALSE	137.913	27	24	310	7	1	1086	113.8	8.09	4078	479.36	23	22	metabolic process;transport	membrane;mitochondrion	catalytic activity;nucleotide binding;transporter activity	Pf01262, Pf02233, Pf05222, Pf12769	23530	ENSG00000112992.16	NNT	5	hsa00760; hsa01100	Nicotinate and nicotinamide metabolism; Metabolic pathways		18	57	71.6	65.2	142.3	30.9	110.8	52.6	67.6	38.3	67.3	47.6	57.6	48.5	12.5	74.3	87.2	58	33.7
TRUE	High	Master Protein	P01861	Immunoglobulin heavy constant gamma 4 OS=Homo sapiens OX=9606 GN=IGHG4 PE=1 SV=1	0	FALSE	137.341	68	15	1180	8	1	327	35.9	7.36	23363	1936.26	14	12	cell organization and biogenesis;defense response;metabolic process;regulation of biological process;response to stimulus	extracellular;membrane	catalytic activity;protein binding	Pf07654, Pf08205	3503	ENSG00000211892.3; ENSG00000277016.2	IGHG4	14; CHR_HSCHR14_3_CTG1				0	53.1	90.3	282.8	465	34	46.9	96.6	272.9	24.6	25.7	111.5	124.9	65.6	368	38.7	31.1	52.9	323.6
TRUE	High	Master Protein	P55060	Exportin-2 OS=Homo sapiens OX=9606 GN=CSE1L PE=1 SV=3	0	FALSE	137.312	40	27	254	27	1	971	110.3	5.77	4300	349.78	24	23	cell death;cell proliferation;transport	cytoplasm;cytosol;membrane;nucleus	protein binding;transporter activity	Pf03378, Pf03810, Pf08506	1434	ENSG00000124207.16	CSE1L	20				0	50.4	51.8	47.4	117.4	76.7	77.3	35.1	51.6	52.8	55.9	67.7	65.1	52.7	232.1	59.8	134.1	225.8	21.8
TRUE	High	Master Protein	P04003	C4b-binding protein alpha chain OS=Homo sapiens OX=9606 GN=C4BPA PE=1 SV=2	0	FALSE	137.162	48	20	308	20	1	597	67	7.3	5928	489.01	18	17	defense response;metabolic process;regulation of biological process;response to stimulus	extracellular;membrane	protein binding;RNA binding	Pf00084	722	ENSG00000123838.10	C4BPA	1	hsa04610; hsa05133	Complement and coagulation cascades; Pertussis		0	49.8	31.6	43.4	16.4	36.3	47.5	18.1	39.6	17.5	30.6	145.7	71.4	74.4	73.6	114.9	40	59	91.8
TRUE	High	Master Protein	P36578	60S ribosomal protein L4 OS=Homo sapiens OX=9606 GN=RPL4 PE=1 SV=5	0	FALSE	137.071	41	18	338	18	1	427	47.7	11.06	5584	479.31	18	16	cell organization and biogenesis;metabolic process;transport	cytoplasm;cytosol;endoplasmic reticulum;membrane;nucleus;ribosome	protein binding;RNA binding;structural molecule activity	Pf00573, Pf14374	6124	ENSG00000174444.14	RPL4	15	hsa03010	Ribosome	Cytoplasmic Ribosomal Proteins	0	145.4	161.6	94.3	179.8	69.9	138.9	42	61.6	54.3	132.4	53.5	166.6	210.3	30.5	133.3	177.1	73.2	42.9
TRUE	High	Master Protein	Q96CM8	Acyl-CoA synthetase family member 2, mitochondrial OS=Homo sapiens OX=9606 GN=ACSF2 PE=1 SV=2	0	FALSE	136.77	45	18	146	18	1	615	68.1	7.55	2835	243.94	18	15	metabolic process	mitochondrion;organelle lumen	catalytic activity;nucleotide binding;protein binding	Pf00501, Pf13193	80221	ENSG00000167107.12	ACSF2	17			Mitochondrial LC-Fatty Acid Beta-Oxidation	0	133.7	144	30.9	205.3	46.9	250	29.4	51.1	103.4	92.5	51.6	86.3	41.2	29.1	53.7	84.8	122.9	39.2
TRUE	High	Master Protein	P02765	Alpha-2-HS-glycoprotein OS=Homo sapiens OX=9606 GN=AHSG PE=1 SV=1	0	FALSE	136.391	44	10	334	10	1	367	39.3	5.72	7221	633.01	10	10	defense response;metabolic process;regulation of biological process;response to stimulus;transport	extracellular;Golgi;organelle lumen	enzyme regulator activity	Pf00031	197		AHSG	3				0	27.7	57.5	84	54.8	85.8	58.4	96.1	125.1	61.5	55.9	26.3	100.9	171.8	238.5	53.3	41.7	78.8	273.7
TRUE	High	Master Protein	P0DOX7	Immunoglobulin kappa light chain OS=Homo sapiens OX=9606 PE=1 SV=1	0	FALSE	136.209	50	8	1148	2	1	214	23.4	7.17	55493		8		response to stimulus	extracellular;membrane		Pf00047, Pf07654, Pf07679, Pf07686, Pf13927								0	18.7	59.2	236.9	156.5	79.8	33	129.6	165.5	142.3	96.1	299.3	142.1	101.5	259.3	20.6	110.4	36.6	262.5
TRUE	High	Master Protein	Q9Y265	RuvB-like 1 OS=Homo sapiens OX=9606 GN=RUVBL1 PE=1 SV=1	0	FALSE	135.969	59	19	240	19	1	456	50.2	6.42	3849	358.54	18	19	cell division;cell organization and biogenesis;metabolic process;regulation of biological process;response to stimulus	cytoplasm;cytoskeleton;cytosol;membrane;nucleus	catalytic activity;nucleotide binding;protein binding	Pf00004, Pf01078, Pf01695, Pf05496, Pf06068, Pf06414, Pf07726, Pf13191, Pf13238, Pf13245, Pf13481	8607	ENSG00000175792.11	RUVBL1	3	hsa04310	Wnt signaling pathway	Gastric Cancer Network 1	0	180.1	152.5	84.5	148.3	82	85.9	72	77.1	85.5	138.1	98.9	64.2	107.4	65.4	112.5	162.4	136.9	65.1
TRUE	High	Master Protein	H0YJE6	Spectrin beta chain, erythrocytic (Fragment) OS=Homo sapiens OX=9606 GN=SPTB PE=1 SV=1	0	FALSE	135.913	39	28	80	4	1	1028	117.4	5.2		267.02		28			protein binding	Pf00169, Pf00435, Pf15410		ENSG00000070182.19		14				0
TRUE	High	Master Protein	O75746	Calcium-binding mitochondrial carrier protein Aralar1 OS=Homo sapiens OX=9606 GN=SLC25A12 PE=1 SV=2	0	FALSE	135.907	55	25	232	21	1	678	74.7	8.38	3903	268.81	21	23	metabolic process;response to stimulus;transport	membrane;mitochondrion	metal ion binding;transporter activity	Pf00153, Pf13499	8604	ENSG00000115840.13	SLC25A12	2				4	159.1	146.1	48.7	164.4	109.4	102.2	62.2	55.2	88.7	118.4	92.8	51.5	30.9	31.9	79.2	115.5	45.7	32.3
TRUE	High	Master Protein	P35609	Alpha-actinin-2 OS=Homo sapiens OX=9606 GN=ACTN2 PE=1 SV=1	0	FALSE	135.876	20	20	571	2	1	894	103.8	5.45	10993	812.57	17	20	cell organization and biogenesis;cellular component movement;metabolic process;regulation of biological process;response to stimulus;transport	cytoplasm;cytoskeleton;cytosol;extracellular;membrane;organelle lumen	metal ion binding;protein binding;structural molecule activity	Pf00307, Pf00435, Pf08726, Pf11971, Pf13499, Pf13833	88	ENSG00000077522.12	ACTN2	1	hsa04510; hsa04810; hsa05412; hsa05203; hsa04670; hsa04520; hsa04530; hsa05146; hsa05322	Focal adhesion; Regulation of actin cytoskeleton; Arrhythmogenic right ventricular cardiomyopathy (ARVC); Viral carcinogenesis; Leukocyte transendothelial migration; Adherens junction; Tight junction; Amoebiasis; Systemic lupus erythematosus	Striated Muscle Contraction; Arrhythmogenic Right Ventricular Cardiomyopathy	0	9.6	2.3	32.4	342.5	1.5	12.2	274.8	268.9	235.9	1232.7	2.8	39.3	50.8	6.5	30.1	10.3	5.9	103
TRUE	High	Master Protein	P16144	Integrin beta-4 OS=Homo sapiens OX=9606 GN=ITGB4 PE=1 SV=5	0	FALSE	135.812	19	25	152	25	1	1822	202	6.09	3008	220.34	25	21	cell communication;cell differentiation;cell organization and biogenesis;cellular component movement;metabolic process;regulation of biological process;response to stimulus	cell surface;membrane;nucleus	protein binding;receptor activity	Pf00041, Pf00362, Pf03160, Pf07965, Pf07974	3691	ENSG00000132470.13	ITGB4	17	hsa05410; hsa04810; hsa05412; hsa04512; hsa05414; hsa04151; hsa04510	Hypertrophic cardiomyopathy (HCM); Regulation of actin cytoskeleton; Arrhythmogenic right ventricular cardiomyopathy (ARVC); ECM-receptor interaction; Dilated cardiomyopathy; PI3K-Akt signaling pathway; Focal adhesion	Focal Adhesion; Integrin-mediated Cell Adhesion; Regulation of Apoptosis by Parathyroid Hormone-related Protein; TGF-beta Signaling Pathway; Alpha 6 Beta 4 signaling pathway; Focal Adhesion-PI3K-Akt-mTOR-signaling pathway; Primary Focal Segmental Glomerulosclerosis FSGS; Arrhythmogenic Right Ventricular Cardiomyopathy	0	128.1	96.6	33.6	60.1	53.3	40.7	87.5	77.3	95.7	33.8	105.2	63.2	91	24.6	134.5	46.2	67.5	47.2
TRUE	High	Master Protein	P10768	S-formylglutathione hydrolase OS=Homo sapiens OX=9606 GN=ESD PE=1 SV=2	0	FALSE	134.65	79	16	478	16	1	282	31.4	7.02	9218	747.17	15	14	metabolic process	cytoplasm;organelle lumen	catalytic activity;protein binding	Pf00326, Pf00756, Pf05448, Pf12695, Pf12697	2098	ENSG00000139684.13	ESD	13	hsa01200	Carbon metabolism	Phase I biotransformations, non P450	0	176.5	191.2	78.5	182.5	129.3	105.5	203.2	141.3	148	151.3	123.7	46.5	109.9	57	95.6	98.9	65.6	67.1
TRUE	High	Master Protein	O43399	Tumor protein D54 OS=Homo sapiens OX=9606 GN=TPD52L2 PE=1 SV=2	0	FALSE	134.25	64	12	237	12	1	206	22.2	5.36	4333	415.62	11	12	regulation of biological process	cytoplasm	protein binding;RNA binding	Pf04201	7165	ENSG00000101150.17	TPD52L2	20				0	160.8	180.6	46.4	177.3	126.7	215.2	120.7	89.2	111.4	160.3	109	43.5	71.8	39	165.4	114.9	38	48.4
TRUE	High	Master Protein	P17844	Probable ATP-dependent RNA helicase DDX5 OS=Homo sapiens OX=9606 GN=DDX5 PE=1 SV=1	0	FALSE	134.151	50	25	397	18	1	614	69.1	8.92	7369	487.52	23	22	cell differentiation;cell growth;cell organization and biogenesis;metabolic process;regulation of biological process;response to stimulus	cytoplasm;membrane;nucleus;spliceosomal complex	catalytic activity;nucleotide binding;protein binding;RNA binding	Pf00270, Pf00271, Pf08061	1655	ENSG00000108654.13	DDX5	17	hsa03040; hsa05202; hsa05205	Spliceosome; Transcriptional misregulation in cancer; Proteoglycans in cancer		0	143	83.6	82.7	175.5	55.9	139	73.3	86.6	78.3	139.4	95.3	51.8	59.3	36.6	183.2	236.5	107.6	47.8
TRUE	High	Master Protein	P16112	Aggrecan core protein OS=Homo sapiens OX=9606 GN=ACAN PE=1 SV=3	0	FALSE	134.123	12	25	123	25	1	2530	261.2	4.13	2174	148.5	25	18												0	20.2	20.3	16.2	38.5	7.8	19.2	24	22.1	26.7	22.3	31.1	32.6	489.9	674.5	20.3	48.7	28.1	705.8
TRUE	High	Master Protein	Q92945	Far upstream element-binding protein 2 OS=Homo sapiens OX=9606 GN=KHSRP PE=1 SV=4	0	FALSE	134.073	40	22	353	20	1	711	73.1	7.3	7222	528.05	21	21	metabolic process;regulation of biological process;response to stimulus;transport	cytoplasm;cytosol;membrane;nucleus	DNA binding;protein binding;RNA binding	Pf00013, Pf07650, Pf09005, Pf13014	8570	ENSG00000088247.17	KHSRP	19			Preimplantation Embryo	2	124	147	43.5	243.7	167.5	115.9	61.1	53.3	107.4	88.5	56.7	51.2	86.3	88.2	84.4	197	69.2	71.9
TRUE	High	Master Protein	O00764	Pyridoxal kinase OS=Homo sapiens OX=9606 GN=PDXK PE=1 SV=1	0	FALSE	133.909	75	17	323	17	1	312	35.1	6.13	6710	514.51	17	16	cell proliferation;metabolic process;transport	cytoplasm;cytosol;extracellular;nucleus;organelle lumen	catalytic activity;metal ion binding;nucleotide binding;protein binding	Pf00294, Pf08543	8566	ENSG00000160209.18	PDXK	21	hsa01100; hsa00750	Metabolic pathways; Vitamin B6 metabolism		0	442	157.9	96.3	125.9	102.5	89.8	297.2	86.7	248.6	211.4	43.3	43.8	58.2	13.3	70.4	54.3	49.1	30.1
TRUE	High	Master Protein	P04217	Alpha-1B-glycoprotein OS=Homo sapiens OX=9606 GN=A1BG PE=1 SV=4	0	FALSE	133.849	58	18	383	18	1	495	54.2	5.86	7032	585.12	15	16	transport	extracellular;organelle lumen	protein binding	Pf00047, Pf13895, Pf13927	1	ENSG00000121410.11	A1BG	19				0	46.9	67.8	82.4	65.7	77.9	96.8	109.5	145.7	61.9	87.9	118.4	103.2	69.2	289.1	56.4	54.3	108	158.7
TRUE	High	Master Protein	P16152	Carbonyl reductase [NADPH] 1 OS=Homo sapiens OX=9606 GN=CBR1 PE=1 SV=3	0	FALSE	133.537	74	18	781	14	1	277	30.4	8.32	16615	1144.33	17	17	cell differentiation;metabolic process	cytoplasm;cytosol	catalytic activity	Pf00106, Pf01370, Pf08659, Pf13561	873; 54093	ENSG00000159228.12	CBR1; SETD4	21	hsa05204; hsa00980; hsa01100; hsa00590	Chemical carcinogenesis; Metabolism of xenobiotics by cytochrome P450; Metabolic pathways; Arachidonic acid metabolism	NRF2 pathway	4	107.2	142.6	68.8	103.1	126.4	85	55.6	51.5	93	104.2	102.3	43.9	73.3	46.8	121.3	158	51.1	85.9
TRUE	High	Master Protein	O00299	Chloride intracellular channel protein 1 OS=Homo sapiens OX=9606 GN=CLIC1 PE=1 SV=4	0	FALSE	133.426	80	19	547	18	1	241	26.9	5.17	11124	844.88	18	18	metabolic process;regulation of biological process;response to stimulus;transport	cytoplasm;membrane;mitochondrion;nucleus	catalytic activity;protein binding;transporter activity	Pf00043, Pf13409, Pf13410, Pf13417	1192	ENSG00000213719.8; ENSG00000206394.8; ENSG00000230685.6; ENSG00000226248.6; ENSG00000223639.6; ENSG00000226651.6; ENSG00000226417.6	CLIC1	6; CHR_HSCHR6_MHC_QBL_CTG1; CHR_HSCHR6_MHC_COX_CTG1; CHR_HSCHR6_MHC_DBB_CTG1; CHR_HSCHR6_MHC_SSTO_CTG1; CHR_HSCHR6_MHC_MANN_CTG1; CHR_HSCHR6_MHC_MCF_CTG1				0	103.5	164.1	89.4	172.1	192.1	102.7	183	116.5	243.3	271.9	154.2	57.2	36.5	45	89.4	54.7	76.3	49
TRUE	High	Master Protein	P31146	Coronin-1A OS=Homo sapiens OX=9606 GN=CORO1A PE=1 SV=4	0	FALSE	133.28	52	20	385	20	1	461	51	6.68	7440	731.19	20	20	cell organization and biogenesis;cellular component movement;defense response;regulation of biological process;response to stimulus;transport	cytoplasm;cytoskeleton;cytosol;endosome;membrane;nucleus	protein binding;RNA binding	Pf00400, Pf08953, Pf08954, Pf13094, Pf13863	11151	ENSG00000102879.15	CORO1A	16	hsa05152; hsa04145	Tuberculosis; Phagosome		0	127.4	80.1	79.9	308.4	131.5	160.8	33.1	32.9	106.9	256.9	30.4	194.3	49.4	75.8	53.4	77.3	146.6	57
TRUE	High	Master Protein	P51648	Fatty aldehyde dehydrogenase OS=Homo sapiens OX=9606 GN=ALDH3A2 PE=1 SV=1	0	FALSE	133.077	45	20	365	19	1	485	54.8	7.88	6965	520.34	20	18	metabolic process	endoplasmic reticulum;membrane;mitochondrion	catalytic activity	Pf00171	224	ENSG00000072210.18	ALDH3A2	17	hsa00380; hsa00561; hsa00053; hsa00040; hsa00410; hsa00330; hsa00310; hsa01100; hsa00071; hsa00010; hsa00620; hsa00280; hsa00340	Tryptophan metabolism; Glycerolipid metabolism; Ascorbate and aldarate metabolism; Pentose and glucuronate interconversions; beta-Alanine metabolism; Arginine and proline metabolism; Lysine degradation; Metabolic pathways; Fatty acid degradation; Glycolysis / Gluconeogenesis; Pyruvate metabolism; Valine, leucine and isoleucine degradation; Histidine metabolism	Tryptophan metabolism	1	37.2	117.5	77	238.5	149	243.4	37.7	117.5	68.9	102.9	233.3	33.5	47.8	19.1	35.1	94.9	85.5	50.5
TRUE	High	Master Protein	P09619	Platelet-derived growth factor receptor beta OS=Homo sapiens OX=9606 GN=PDGFRB PE=1 SV=1	0	FALSE	132.855	24	20	143	19	1	1106	123.9	4.98	2560	156.88	20	17	cell organization and biogenesis;cell proliferation;cellular component movement;development;metabolic process;regulation of biological process;response to stimulus	cell surface;cytoplasm;membrane;nucleus;organelle lumen;vacuole	catalytic activity;nucleotide binding;protein binding;receptor activity;signal transducer activity;structural molecule activity	Pf00047, Pf00069, Pf07679, Pf07714, Pf13895, Pf13927	5159	ENSG00000113721.13	PDGFRB	5	hsa05231; hsa04540; hsa04010; hsa05230; hsa04014; hsa05166; hsa05215; hsa04060; hsa05218; hsa05206; hsa04020; hsa05214; hsa04810; hsa05200; hsa04510; hsa04015; hsa01521; hsa04072; hsa04151	Choline metabolism in cancer; Gap junction; MAPK signaling pathway; Central carbon metabolism in cancer; Ras signaling pathway; HTLV-I infection; Prostate cancer; Cytokine-cytokine receptor interaction; Melanoma; MicroRNAs in cancer; Calcium signaling pathway; Glioma; Regulation of actin cytoskeleton; Pathways in cancer; Focal adhesion; Rap1 signaling pathway; EGFR tyrosine kinase inhibitor resis…	MAPK Signaling Pathway; Focal Adhesion; Focal Adhesion-PI3K-Akt-mTOR-signaling pathway; Imatinib and Chronic Myeloid Leukemia; Signaling Pathways in Glioblastoma; Osteoblast Signaling; Regulation of Actin Cytoskeleton; ESC Pluripotency Pathways; PDGF Pathway	1	176.2	82.2	61.1	112.4	39.9	157.1	45.5	75.6	99.1	113.8	69.3	28.1	34.2	15.8	35.1	53.7	30.4	28.4
TRUE	High	Master Protein	Q96AC1	Fermitin family homolog 2 OS=Homo sapiens OX=9606 GN=FERMT2 PE=1 SV=1	0	FALSE	132.638	49	23	269	23	1	680	77.8	6.7	4961	406.39	22	16	cell organization and biogenesis;regulation of biological process;response to stimulus	cell surface;cytoplasm;cytoskeleton;cytosol;membrane;nucleus	protein binding	Pf00169, Pf00373	10979	ENSG00000073712.14	FERMT2	14				0	79.3	129.4	54.9	177	92	122.9	66.2	142.6	159.8	177	89.9	33.4	108.1	51.7	51.9	41.8	68.5	71.4
TRUE	High	Master Protein	P55809	Succinyl-CoA:3-ketoacid coenzyme A transferase 1, mitochondrial OS=Homo sapiens OX=9606 GN=OXCT1 PE=1 SV=1	0	FALSE	132.247	53	19	260	19	1	520	56.1	7.46	5893	416.22	17	18	metabolic process;regulation of biological process;response to stimulus	mitochondrion;organelle lumen	catalytic activity;protein binding	Pf01144	5019	ENSG00000083720.12	OXCT1	5	hsa00650; hsa00072; hsa00280	Butanoate metabolism; Synthesis and degradation of ketone bodies; Valine, leucine and isoleucine degradation	Synthesis and Degradation of Ketone Bodies	0	94	178.5	33.9	105.9	126.3	92.8	295.3	175.7	89.5	43	64.7	77.9	78.8	25.1	169.7	54.2	38.8	39.1
TRUE	High	Master Protein	P06748	Nucleophosmin OS=Homo sapiens OX=9606 GN=NPM1 PE=1 SV=2	0	FALSE	132.173	54	12	382	11	1	294	32.6	4.78	10274	762.07	11	11	cell growth;cell organization and biogenesis;cellular homeostasis;metabolic process;regulation of biological process;response to stimulus;transport	cytoplasm;cytoskeleton;cytosol;membrane;nucleus	DNA binding;enzyme regulator activity;protein binding;RNA binding	Pf03066	4869	ENSG00000181163.13	NPM1	5				1	241.7	108.6	36.5	292	94	273.8	100.6	103.8	116.8	191.1	55	95.1	38.3	29.4	60.9	99.5	77.2	31.9
TRUE	High	Master Protein	P07196	Neurofilament light polypeptide OS=Homo sapiens OX=9606 GN=NEFL PE=1 SV=3	0	FALSE	131.92	44	25	476	23	1	543	61.5	4.65	7203	468.12	25	21	cell organization and biogenesis;cellular component movement;metabolic process;regulation of biological process;response to stimulus;transport	cytoplasm;cytosol	catalytic activity;motor activity;protein binding;structural molecule activity	Pf00038, Pf01576, Pf07889	4747	ENSG00000277586.2	NEFL	8	hsa05014	Amyotrophic lateral sclerosis (ALS)	Amyotrophic lateral sclerosis (ALS); Association Between Physico-Chemical Features and Toxicity Associated Pathways	1	85.6	26	98.3	30.1	225.7	70.1	36.3	26.1	13.3	26.7	29.9	61.7	24.7	14.6	68.8	254.3	13.1	143.8
TRUE	High	Master Protein	O95865	N(G),N(G)-dimethylarginine dimethylaminohydrolase 2 OS=Homo sapiens OX=9606 GN=DDAH2 PE=1 SV=1	0	FALSE	131.523	80	14	382	13	1	285	29.6	6.01	8361	608.11	14	13	metabolic process;regulation of biological process;response to stimulus	cytoplasm;cytosol;mitochondrion	catalytic activity;protein binding	Pf02274	23564	ENSG00000233076.6; ENSG00000227317.6; ENSG00000213722.8; ENSG00000228128.6; ENSG00000225635.7; ENSG00000206395.8; ENSG00000226634.6	DDAH2	6; CHR_HSCHR6_MHC_MANN_CTG1; CHR_HSCHR6_MHC_DBB_CTG1; CHR_HSCHR6_MHC_SSTO_CTG1; CHR_HSCHR6_MHC_MCF_CTG1; CHR_HSCHR6_MHC_QBL_CTG1; CHR_HSCHR6_MHC_COX_CTG1				1	149.4	162	125.2	70.7	77.1	129.4	120.8	84.9	144.1	204.2	112	43.4	128.3	40.8	101.3	60.1	92.4	52
TRUE	High	Master Protein	P21281	V-type proton ATPase subunit B, brain isoform OS=Homo sapiens OX=9606 GN=ATP6V1B2 PE=1 SV=3	0	FALSE	131.416	45	18	209	18	1	511	56.5	5.81	3842	301.93	17	16	cellular homeostasis;metabolic process;regulation of biological process;response to stimulus;transport	cytoplasm;cytosol;membrane	catalytic activity;nucleotide binding;protein binding;transporter activity	Pf00006, Pf00306, Pf02874	526	ENSG00000147416.10	ATP6V1B2	8	hsa00190; hsa04966; hsa05110; hsa04145; hsa05323; hsa05120; hsa04721; hsa01100; hsa04150	Oxidative phosphorylation; Collecting duct acid secretion; Vibrio cholerae infection; Phagosome; Rheumatoid arthritis; Epithelial cell signaling in Helicobacter pylori infection; Synaptic vesicle cycle; Metabolic pathways; mTOR signaling pathway		0	35.2	54.9	41.8	70.6	68.9	45.2	36	37.8	53.5	74.1	32	80.1	719.1	20.1	30.5	79.7	37.3	675.3
TRUE	High	Master Protein	P02649	Apolipoprotein E OS=Homo sapiens OX=9606 GN=APOE PE=1 SV=1	0	FALSE	131.161	57	18	526	18	1	317	36.1	5.73	12638	807.27	18	17	cell communication;cell organization and biogenesis;cellular homeostasis;metabolic process;regulation of biological process;response to stimulus;transport	cytoplasm;endoplasmic reticulum;endosome;extracellular;Golgi;membrane;nucleus;organelle lumen	antioxidant activity;catalytic activity;enzyme regulator activity;metal ion binding;protein binding;structural molecule activity;transporter activity	Pf01442	348	ENSG00000130203.9	APOE	19	hsa05010	Alzheimer's disease	ApoE and miR-146 in inflammation and atherosclerosis; Apoptosis-related network due to altered Notch3 in ovarian cancer; Statin Pathway; Alzheimers Disease; Vitamin B12 Metabolism	0	84.2	96.5	59.9	168	44.2	134.1	34	43.8	52.2	161.7	52.3	48	137	109.8	59.8	33.4	106.8	101.3
TRUE	High	Master Protein	P49023	Paxillin OS=Homo sapiens OX=9606 GN=PXN PE=1 SV=3	0	FALSE	131.05	56	18	183	18	1	591	64.5	6.19	2586	374.22	17	17	cell organization and biogenesis;cellular component movement;metabolic process;regulation of biological process;response to stimulus;transport	cytoplasm;cytoskeleton;cytosol;membrane	DNA binding;metal ion binding;protein binding;transporter activity	Pf00412, Pf03535	5829	ENSG00000089159.16	PXN	12	hsa04670; hsa04510; hsa04062; hsa04810; hsa04370; hsa05100; hsa05205; hsa05203	Leukocyte transendothelial migration; Focal adhesion; Chemokine signaling pathway; Regulation of actin cytoskeleton; VEGF signaling pathway; Bacterial invasion of epithelial cells; Proteoglycans in cancer; Viral carcinogenesis	Signaling of Hepatocyte Growth Factor Receptor; Integrin-mediated Cell Adhesion; Chemokine signaling pathway; VEGFA-VEGFR2 Signaling Pathway; Prolactin Signaling Pathway; Focal Adhesion; Regulation of Actin Cytoskeleton; Rac1/Pak1/p38/MMP-2 pathway; Oncostatin M Signaling Pathway	0	268.8	218.1	84.3	216.2	98.5	155.4	228.8	207.8	125	195.4	207.4	34.8	41.8	21.6	124.5	50.3	112.2	22.7
TRUE	High	Master Protein	Q5SSJ5	Heterochromatin protein 1-binding protein 3 OS=Homo sapiens OX=9606 GN=HP1BP3 PE=1 SV=1	0	FALSE	130.282	46	25	271	25	1	553	61.2	9.67	4447	370.5	24	22	cell organization and biogenesis;regulation of biological process;response to stimulus	chromosome;nucleus	DNA binding;protein binding	Pf00538	50809	ENSG00000127483.17	HP1BP3	1				0	74.8	145.6	73.4	85.3	50.6	98.2	72.2	78.1	38.3	111.7	59.6	657.6	21.1	20.4	95.2	100.1	114.3	26.6
TRUE	High	Master Protein	Q9UBQ7	Glyoxylate reductase/hydroxypyruvate reductase OS=Homo sapiens OX=9606 GN=GRHPR PE=1 SV=1	0	FALSE	130.094	63	17	285	17	1	328	35.6	7.39	5582	494.56	16	13	cell organization and biogenesis;metabolic process	cytoplasm;cytosol;organelle lumen	catalytic activity;nucleotide binding;protein binding	Pf00389, Pf01488, Pf02826, Pf03446, Pf03807	9380	ENSG00000137106.17	GRHPR	9	hsa01100; hsa00260; hsa00630; hsa00620	Metabolic pathways; Glycine, serine and threonine metabolism; Glyoxylate and dicarboxylate metabolism; Pyruvate metabolism		0	195.3	204.3	144.7	179.9	82.5	52.3	39.6	59.4	99.6	144.6	41.1	73.8	62.3	22	97.7	125.3	84.7	49.5
TRUE	High	Master Protein	P35998	26S proteasome regulatory subunit 7 OS=Homo sapiens OX=9606 GN=PSMC2 PE=1 SV=3	0	FALSE	130.09	47	20	236	20	1	433	48.6	5.95	4668	292.81	19	17	cell differentiation;metabolic process;regulation of biological process;response to stimulus;transport	cytoplasm;cytosol;extracellular;membrane;nucleus;organelle lumen;proteasome	catalytic activity;nucleotide binding;protein binding	Pf00004, Pf00158, Pf07724, Pf07726, Pf07728, Pf13191, Pf13401	5701	ENSG00000161057.11	PSMC2	7	hsa05169; hsa03050	Epstein-Barr virus infection; Proteasome	Parkin-Ubiquitin Proteasomal System pathway; Proteasome Degradation	0	92.7	129.3	74.2	205.2	79.8	92.7	67.5	99.2	109.8	133	97.8	105.7	55.6	58.3	88	136.5	105.7	32.5
TRUE	High	Master Protein	P00491	Purine nucleoside phosphorylase OS=Homo sapiens OX=9606 GN=PNP PE=1 SV=2	0	FALSE	130.036	70	17	194	17	1	289	32.1	6.95	4137	304.62	17	15	metabolic process;regulation of biological process;response to stimulus;transport	cytoplasm;cytoskeleton;cytosol;extracellular;nucleus;organelle lumen	catalytic activity	Pf01048	4860	ENSG00000198805.11	PNP	14	hsa01100; hsa00240; hsa00230; hsa00760	Metabolic pathways; Pyrimidine metabolism; Purine metabolism; Nicotinate and nicotinamide metabolism		0	111.1	40.2	37.6	88.5	61.8	51.7	126.8	61.3	40.7	83.7	117.3	120.2	60.6	33.1	55.7	75.4	114.3	57.8
TRUE	High	Master Protein	O43143	Pre-mRNA-splicing factor ATP-dependent RNA helicase DHX15 OS=Homo sapiens OX=9606 GN=DHX15 PE=1 SV=2	0	FALSE	130.01	31	22	226	22	1	795	90.9	7.46	4269	301.71	21	21	metabolic process;response to stimulus	cytoplasm;nucleus;spliceosomal complex	catalytic activity;nucleotide binding;protein binding;RNA binding	Pf00270, Pf00271, Pf04408, Pf07717, Pf13401	1665	ENSG00000109606.12	DHX15	4	hsa03040	Spliceosome	mRNA Processing	0	123.3	148.8	46.2	153.2	68.5	106.6	58.2	58.2	99.8	103.8	90.7	83.6	77.8	44.4	69.6	156.5	106	59.6
TRUE	High	Master Protein	Q13451	Peptidyl-prolyl cis-trans isomerase FKBP5 OS=Homo sapiens OX=9606 GN=FKBP5 PE=1 SV=2	0	FALSE	129.691	44	18	133	18	1	457	51.2	5.9	2130	243.25	18	18	metabolic process	cytoplasm;cytosol;membrane;nucleus	catalytic activity;protein binding	Pf00254, Pf00515, Pf07719, Pf13371, Pf13414, Pf13424, Pf13432	2289	ENSG00000096060.14	FKBP5	6	hsa04915	Estrogen signaling pathway	Farnesoid X Receptor Pathway; Mecp2 and Associated Rett Syndrome	0	155.3	71.8	55.8	191.5	143.6	184.9	62	76	30.1	121.7	110.6	58.4	94.3	60.1	97.4	130.6	122.3	89.4
TRUE	High	Master Protein	O75116	Rho-associated protein kinase 2 OS=Homo sapiens OX=9606 GN=ROCK2 PE=1 SV=4	0	FALSE	129.628	24	28	162	24	1	1388	160.8	6.02	2542	220.81	25	24	cell organization and biogenesis;metabolic process;regulation of biological process;response to stimulus	cytoplasm;cytoskeleton;cytosol;membrane;nucleus	catalytic activity;metal ion binding;motor activity;nucleotide binding;protein binding;RNA binding;structural molecule activity	Pf00069, Pf00130, Pf01576, Pf01636, Pf02185, Pf02463, Pf04111, Pf04156, Pf05557, Pf05622, Pf05667, Pf06160, Pf07714, Pf07888, Pf08912, Pf09726, Pf09731, Pf11559, Pf12128, Pf12718, Pf12795, Pf13166, Pf14531, Pf14915	9475	ENSG00000134318.13	ROCK2	2	hsa04810; hsa04310; hsa04270; hsa05131; hsa04062; hsa05205; hsa04921; hsa04024; hsa04670; hsa05130; hsa05132; hsa04611; hsa04510; hsa04360; hsa05200; hsa04071; hsa04022	Regulation of actin cytoskeleton; Wnt signaling pathway; Vascular smooth muscle contraction; Shigellosis; Chemokine signaling pathway; Proteoglycans in cancer; Oxytocin signaling pathway; cAMP signaling pathway; Leukocyte transendothelial migration; Pathogenic Escherichia coli infection; Salmonella infection; Platelet activation; Focal adhesion; Axon guidance; Pathways in cancer; Sphingolipid sig…	VEGFA-VEGFR2 Signaling Pathway; Leptin signaling pathway; G13 Signaling Pathway; Integrin-mediated Cell Adhesion; Regulation of Actin Cytoskeleton; Association Between Physico-Chemical Features and Toxicity Associated Pathways; Pathogenic Escherichia coli infection; MicroRNAs in cardiomyocyte hypertrophy; Focal Adhesion; Androgen receptor signaling pathway; Chemokine signaling pathway; Spinal Cor…	4	147.7	127.4	86.5	157.6	44.8	129.5	65.9	76.3	81	104.2	93.9	174.2	95.3	37.6	85.4	113.9	82.8	38.6
TRUE	High	Master Protein	P67809	Nuclease-sensitive element-binding protein 1 OS=Homo sapiens OX=9606 GN=YBX1 PE=1 SV=3	0	FALSE	129.619	44	10	190	5	1	324	35.9	9.88	4829	444.81	10	10	metabolic process;regulation of biological process	cytoplasm;cytosol;extracellular;membrane;nucleus;spliceosomal complex	DNA binding;protein binding;RNA binding	Pf00313	4904	ENSG00000065978.18	YBX1	1			Mecp2 and Associated Rett Syndrome; Sudden Infant Death Syndrome (SIDS) Susceptibility Pathways; Brain-Derived Neurotrophic Factor (BDNF) signaling pathway; mRNA Processing	0	433.6	318.3	77.7	579.8	118.1	164.7	63.1	77.5	368.6	296.8	6.8	41.7	70.7	20.9	34.1	51.3	2.2	62.2
TRUE	High	Master Protein	P20020	Plasma membrane calcium-transporting ATPase 1 OS=Homo sapiens OX=9606 GN=ATP2B1 PE=1 SV=3	0	FALSE	129.582	17	19	246	7	1	1258	138.7	6.04	4501	418.91	19	16	cell communication;cellular homeostasis;response to stimulus;transport	membrane;nucleus	catalytic activity;metal ion binding;nucleotide binding;protein binding;transporter activity	Pf00122, Pf00689, Pf00690, Pf00702, Pf08282, Pf12424, Pf12710, Pf13246	490		ATP2B1	12	hsa04961; hsa04978; hsa04261; hsa04020; hsa04972; hsa04970; hsa04022; hsa04024	Endocrine and other factor-regulated calcium reabsorption; Mineral absorption; Adrenergic signaling in cardiomyocytes; Calcium signaling pathway; Pancreatic secretion; Salivary secretion; cGMP-PKG signaling pathway; cAMP signaling pathway	Calcium Regulation in the Cardiac Cell	0	14.2	48.6	49.3	15.5	39	44.6	33.5	49.9	60.7	52.4	54.9	95.4	24.3	66.4	154.7	313.5	4.1	37
TRUE	High	Master Protein	P62424	60S ribosomal protein L7a OS=Homo sapiens OX=9606 GN=RPL7A PE=1 SV=2	0	FALSE	129.531	54	19	280	19	1	266	30	10.61	4869	473.26	18	17	cell organization and biogenesis;metabolic process;transport	cytoplasm;cytosol;membrane;nucleus;ribosome	protein binding;RNA binding;structural molecule activity	Pf01248	6130	ENSG00000280858.2; ENSG00000148303.16	RPL7A	9; CHR_HG2030_PATCH	hsa03010	Ribosome	Cytoplasmic Ribosomal Proteins	0	153.9	126.7	75.2	172.6	91.4	176	100.4	58.9	38.5	259.2	76.7	115.9	70	48.9	116.9	86.8	95	44.8
TRUE	High	Master Protein	P25311	Zinc-alpha-2-glycoprotein OS=Homo sapiens OX=9606 GN=AZGP1 PE=1 SV=2	0	FALSE	129.452	55	15	195	15	1	298	34.2	6.05	3508	352.96	14	15	metabolic process;regulation of biological process;response to stimulus;transport	extracellular;membrane;nucleus	catalytic activity;protein binding;transporter activity	Pf00129, Pf07654	563	ENSG00000160862.12	AZGP1	7				0	27.6	24.3	19.7	60.3	49.8	58.1	125.4	90.2	25.9	72.5	79.1	95.9	384	199.7	83.2	21.4	38.7	246.2
TRUE	High	Master Protein	P07858	Cathepsin B OS=Homo sapiens OX=9606 GN=CTSB PE=1 SV=3	0	FALSE	129.34	37	12	261	12	1	339	37.8	6.3	5309	449.61	12	12	cell differentiation;metabolic process;regulation of biological process;response to stimulus;transport	extracellular;mitochondrion;organelle lumen;vacuole	catalytic activity;protein binding	Pf00112, Pf08127	1508	ENSG00000164733.20	CTSB	8	hsa04210; hsa04142; hsa04924; hsa04612; hsa04621	Apoptosis; Lysosome; Renin secretion; Antigen processing and presentation; NOD-like receptor signaling pathway		0	143.6	83.6	45.2	236.5	86.9	164.9	71.7	64.9	96.6	127.8	79.3	506	75.7	73.6	99.6	211.7	53.5	56.2
TRUE	High	Master Protein	P04179	Superoxide dismutase [Mn], mitochondrial OS=Homo sapiens OX=9606 GN=SOD2 PE=1 SV=3	0	FALSE	129.176	82	15	355	15	1	222	24.7	8.25	6436	519.66	14	12												0	105.6	161	57.9	189.9	227.3	176.4	148	84.9	104.3	254.6	132.5	95.6	53.9	179.3	80.6	125.6	42.5	67
TRUE	High	Master Protein	P54886	Delta-1-pyrroline-5-carboxylate synthase OS=Homo sapiens OX=9606 GN=ALDH18A1 PE=1 SV=2	0	FALSE	129.088	35	21	150	21	1	795	87.2	7.12	2892	185.28	21	19	metabolic process	cytoplasm;cytosol;membrane;mitochondrion	catalytic activity;nucleotide binding;protein binding;RNA binding	Pf00171, Pf00696	5832	ENSG00000059573.8	ALDH18A1	10	hsa01230; hsa00330; hsa01100	Biosynthesis of amino acids; Arginine and proline metabolism; Metabolic pathways	Urea cycle and metabolism of amino groups; Amino Acid metabolism	0	148.9	203	85.4	134	76.9	152	118.4	52.8	86.5	84.2	63.3	130.3	56.1	73	39.3	137.2	44	31.8
TRUE	High	Master Protein	P27361	Mitogen-activated protein kinase 3 OS=Homo sapiens OX=9606 GN=MAPK3 PE=1 SV=4	0	FALSE	128.814	74	19	253	13	1	379	43.1	6.74	4506	315.99	19	15	cell communication;cell death;cell differentiation;cell organization and biogenesis;cellular component movement;cellular homeostasis;metabolic process;regulation of biological process;response to stimulus;transport	cytoplasm;cytoskeleton;cytosol;endosome;Golgi;membrane;mitochondrion;nucleus	catalytic activity;nucleotide binding;protein binding;signal transducer activity	Pf00069, Pf01636, Pf07714	5595	ENSG00000102882.11	MAPK3	16	hsa04668; hsa04068; hsa04015; hsa04012; hsa05133; hsa04150; hsa04664; hsa04024; hsa04350; hsa04066; hsa04370; hsa05210; hsa04933; hsa05205; hsa04071; hsa04062; hsa01524; hsa05142; hsa04724; hsa05220; hsa04713; hsa05214; hsa04210; hsa04810; hsa04666; hsa04151; hsa04380; hsa04917; hsa04914; hsa05215; hsa05218; hsa05132; hsa05160; hsa05164; hsa04320; hsa05230; hsa05221; hsa04650; hsa05211; hsa05010;…	TNF signaling pathway; FoxO signaling pathway; Rap1 signaling pathway; ErbB signaling pathway; Pertussis; mTOR signaling pathway; Fc epsilon RI signaling pathway; cAMP signaling pathway; TGF-beta signaling pathway; HIF-1 signaling pathway; VEGF signaling pathway; Colorectal cancer; AGE-RAGE signaling pathway in diabetic complications; Proteoglycans in cancer; Sphingolipid signaling pathway; Chemo…	Human Thyroid Stimulating Hormone (TSH) signaling pathway; Alpha 6 Beta 4 signaling pathway; Angiopoietin Like Protein 8 Regulatory Pathway; MicroRNAs in cardiomyocyte hypertrophy; IL-7 Signaling Pathway; TCA Cycle Nutrient Utilization and Invasiveness of Ovarian Cancer; Osteopontin Signaling; Focal Adhesion-PI3K-Akt-mTOR-signaling pathway; IL-5 Signaling Pathway; PDGF Pathway; Serotonin Receptor…	0	61.5	84.4	29.5	55.2	38.5	99.7	35.1	40.5	62.9	34.7	43.6	100	46	9.6	54.2	38.9	39.7	15.6
TRUE	High	Master Protein	Q8NBS9	Thioredoxin domain-containing protein 5 OS=Homo sapiens OX=9606 GN=TXNDC5 PE=1 SV=2	0	FALSE	128.776	53	17	399	17	1	432	47.6	5.97	8473	615.39	17	13	cellular homeostasis;metabolic process;regulation of biological process;response to stimulus;transport	endoplasmic reticulum;extracellular;organelle lumen	catalytic activity;protein binding	Pf00085, Pf13098, Pf13905	81567	ENSG00000239264.8	TXNDC5	6	hsa04141	Protein processing in endoplasmic reticulum		0	60.2	53.7	29.6	121	24.3	100.8	89.1	73	74.6	150.9	82.6	67.1	48.2	39	67.7	56.6	39.7	21.1
TRUE	High	Master Protein	P30044	Peroxiredoxin-5, mitochondrial OS=Homo sapiens OX=9606 GN=PRDX5 PE=1 SV=4	0	FALSE	128.114	66	14	963	14	1	214	22.1	8.7	19081	1520.86	14	14	cell death;cellular homeostasis;defense response;metabolic process;regulation of biological process;response to stimulus	cytoplasm;cytosol;mitochondrion;nucleus;organelle lumen	antioxidant activity;catalytic activity;DNA binding;enzyme regulator activity;protein binding	Pf00578, Pf08534	25824	ENSG00000126432.13	PRDX5	11	hsa04146	Peroxisome	Selenium Micronutrient Network	0	121.9	141.7	85.9	103.7	80.5	64.2	87.5	60.5	95.5	87.3	108.5	75	61.4	30.5	127.8	110.6	42.3	126.3
TRUE	High	Master Protein	Q6DD88	Atlastin-3 OS=Homo sapiens OX=9606 GN=ATL3 PE=1 SV=1	0	FALSE	127.855	44	17	311	5	1	541	60.5	5.66	6315	496.61	17	13	cell organization and biogenesis;regulation of biological process;transport	endoplasmic reticulum;membrane	catalytic activity;nucleotide binding;protein binding	Pf02263	25923	ENSG00000184743.12	ATL3	11				12	187.3	147.1	74.7	157.2	181.6	187.2	90.7	186.5	196.4	281.9	264.7	49.8	58	14.2	168.5	86.8	51.6	21.2
TRUE	High	Master Protein	O43852	Calumenin OS=Homo sapiens OX=9606 GN=CALU PE=1 SV=2	0	FALSE	127.853	48	15	300	15	1	315	37.1	4.64	4788	437.85	12	15	metabolic process	endoplasmic reticulum;extracellular;Golgi;membrane;organelle lumen	metal ion binding;protein binding	Pf13499	813	ENSG00000128595.16	CALU	7			NOTCH1 regulation of human endothelial cell calcification	0	230.1	113.8	131.8	106	49.8	87.1	125.1	80.8	117.5	111.8	119.2	54.4	96.9	68.9	133.6	199.8	114.3	28.9
TRUE	High	Master Protein	Q9UHB6	LIM domain and actin-binding protein 1 OS=Homo sapiens OX=9606 GN=LIMA1 PE=1 SV=1	0	FALSE	127.821	29	17	134	17	1	759	85.2	6.84	2824	196.71	17	16	cell organization and biogenesis;regulation of biological process	cytoplasm;cytoskeleton	metal ion binding;protein binding	Pf00412	51474	ENSG00000050405.13	LIMA1	12				0	90.8	311.9	77.9	164.9	78.8	71.2	52.4	84.9	285.9	177.7	223.9	28.2	83.3	51.1	27.8	84.1	54.7	47.3
TRUE	High	Master Protein	D6RF35	Vitamin D-binding protein OS=Homo sapiens OX=9606 GN=GC PE=1 SV=1	0	FALSE	127.543	58	24	252	4	1	476	53	5.52		991.46		24	transport	extracellular	transporter activity	Pf00273, Pf09164		ENSG00000145321.12		4				0	4.9	4.9	590.7	2.7	69.3	21.8	8.7	301.7	52.4	4.8	177.4	5.6	3.5	2.6	4.4	15.2	4	246.1
TRUE	High	Master Protein	P22102	Trifunctional purine biosynthetic protein adenosine-3 OS=Homo sapiens OX=9606 GN=GART PE=1 SV=1	0	FALSE	127.438	28	19	194	19	1	1010	107.7	6.7	4291	291.55	19	16	metabolic process;response to stimulus	cytoplasm;cytosol	catalytic activity;metal ion binding;nucleotide binding	Pf00551, Pf00586, Pf01071, Pf02222, Pf02655, Pf02769, Pf02843, Pf02844, Pf03435, Pf07478, Pf08442, Pf08443, Pf13535, Pf15632	2618	ENSG00000159131.16	GART	21	hsa01523; hsa01100; hsa00230; hsa00670	Antifolate resistance; Metabolic pathways; Purine metabolism; One carbon pool by folate	Folate Metabolism; One Carbon Metabolism	0	128	127.5	90.5	199.5	94.1	100.2	59.2	71.8	91.9	112.7	70.8	123.1	148.8	24	109	154	89.8	72
TRUE	High	Master Protein	P02748	Complement component C9 OS=Homo sapiens OX=9606 GN=C9 PE=1 SV=2	0	FALSE	127.381	43	19	167	18	1	559	63.1	5.59	2996	226.92	19	15	cell organization and biogenesis;defense response;metabolic process;regulation of biological process;response to stimulus	cytosol;extracellular;membrane	protein binding	Pf00057, Pf00090, Pf01823	735	ENSG00000113600.10	C9	5	hsa05146; hsa05322; hsa05020; hsa04610	Amoebiasis; Systemic lupus erythematosus; Prion diseases; Complement and coagulation cascades	Allograft Rejection; Complement Activation; Complement and Coagulation Cascades	1	38.7	50.4	93	47.4	91.6	22.6	70.9	67.5	35.5	37.5	126.4	66.1	122.2	359.5	73.5	43.1	53.7	222.9
TRUE	High	Master Protein	Q15393	Splicing factor 3B subunit 3 OS=Homo sapiens OX=9606 GN=SF3B3 PE=1 SV=4	0	FALSE	127.265	27	23	217	23	1	1217	135.5	5.26	4250	304.12	23	21	cell organization and biogenesis;metabolic process;regulation of biological process	nucleus;spliceosomal complex	protein binding;RNA binding	Pf03178, Pf10433	23450	ENSG00000189091.12	SF3B3	16	hsa03040	Spliceosome	mRNA Processing	0	105.5	108.3	54.1	149.7	36.6	103.1	33	44.8	68.2	76.3	51.8	56.9	72.2	32.6	81.8	86.5	64.2	47.5
TRUE	High	Master Protein	O15143	Actin-related protein 2/3 complex subunit 1B OS=Homo sapiens OX=9606 GN=ARPC1B PE=1 SV=3	0	FALSE	127.234	51	13	302	12	1	372	40.9	8.35	6204	454.59	13	13	cell organization and biogenesis;cellular component movement;regulation of biological process;response to stimulus	cytoplasm;cytoskeleton;cytosol	protein binding;structural molecule activity	Pf00400	10095	ENSG00000130429.12	ARPC1B	7	hsa05131; hsa04810; hsa04144; hsa05100; hsa05130; hsa04666; hsa05132	Shigellosis; Regulation of actin cytoskeleton; Endocytosis; Bacterial invasion of epithelial cells; Pathogenic Escherichia coli infection; Fc gamma R-mediated phagocytosis; Salmonella infection	Pathogenic Escherichia coli infection; Microglia Pathogen Phagocytosis Pathway	1	120.4	142.6	76.6	181.8	74.2	95.3	55.9	73	197.4	136.3	108.3	114.6	67.9	50.3	79	95.9	80.6	37.6
TRUE	High	Master Protein	O60547	GDP-mannose 4,6 dehydratase OS=Homo sapiens OX=9606 GN=GMDS PE=1 SV=1	0	FALSE	126.959	55	15	338	15	1	372	41.9	7.31	6107	520.05	15	15	metabolic process;regulation of biological process;response to stimulus	cytoplasm;cytosol	catalytic activity;nucleotide binding;protein binding	Pf01370, Pf04321, Pf13460	2762	ENSG00000112699.10	GMDS	6	hsa00520; hsa01100; hsa00051	Amino sugar and nucleotide sugar metabolism; Metabolic pathways; Fructose and mannose metabolism		0	32.3	249.3	105.9	193.9	16.6	143.6	88.8	133.4	278.7	249.8	126.7	92.9	62	24.7	157.8	130.1	32.8	32.4
TRUE	High	Master Protein	Q86W92	Liprin-beta-1 OS=Homo sapiens OX=9606 GN=PPFIBP1 PE=1 SV=2	0	FALSE	126.838	31	24	212	22	1	1011	114	5.55	3181	243.51	23	21	cell organization and biogenesis;metabolic process	cytosol;membrane	protein binding	Pf00536, Pf04111, Pf05483, Pf05911, Pf07647	8496	ENSG00000110841.13	PPFIBP1	12				1	65	137.2	74	97.7	69.3	160.8	79.9	246.4	169.7	233.2	105.1	34.7	55.9	50	83.1	42.7	125.9	83.6
TRUE	High	Master Protein	Q9BTV4	Transmembrane protein 43 OS=Homo sapiens OX=9606 GN=TMEM43 PE=1 SV=1	0	FALSE	126.178	47	16	248	16	1	400	44.8	8.13	4955	359.93	16	15	cell organization and biogenesis	endoplasmic reticulum;Golgi;membrane;nucleus;organelle lumen	protein binding	Pf07787	79188	ENSG00000170876.7	TMEM43	3				0	197.3	85.6	46.1	122.1	59.1	165.9	110.2	71.5	110	114.2	117.5	96.8	87.7	69	104.2	87.5	84	42.5
TRUE	High	Master Protein	P21291	Cysteine and glycine-rich protein 1 OS=Homo sapiens OX=9606 GN=CSRP1 PE=1 SV=3	0	FALSE	126.069	65	12	454	12	1	193	20.6	8.57	9892	819.41	12	12		nucleus	metal ion binding;RNA binding	Pf00412	1465	ENSG00000159176.13	CSRP1	1			Mecp2 and Associated Rett Syndrome	0	108.7	291.6	24.6	136.3	76.9	95.8	106.2	58.7	109.3	64	60.8	51.7	246.7	210.5	80.6	112.1	70.9	81.4
TRUE	High	Master Protein	P62937	Peptidyl-prolyl cis-trans isomerase A OS=Homo sapiens OX=9606 GN=PPIA PE=1 SV=2	0	FALSE	126.008	85	14	1391	14	1	165	18	7.81	34110	1761.2	14	12	cell organization and biogenesis;cellular component movement;metabolic process;regulation of biological process;response to stimulus;transport	cytoplasm;cytosol;extracellular;membrane;nucleus;organelle lumen	catalytic activity;protein binding;RNA binding	Pf00160	5478	ENSG00000196262.13	PPIA	7			Prolactin Signaling Pathway	0	191.8	119.2	116.7	126.1	165.5	84.8	126	78.4	127.6	172.6	119.1	89.7	119	50.8	124.7	129.1	109	83.4
TRUE	High	Master Protein	O43301	Heat shock 70 kDa protein 12A OS=Homo sapiens OX=9606 GN=HSPA12A PE=1 SV=2	0	FALSE	125.676	44	25	190	21	1	675	74.9	6.77	3265	257.01	25	20			nucleotide binding	Pf00012	259217	ENSG00000165868.13	HSPA12A	10				4	303.4	105.5	65.3	103.5	135.4	134.1	114.2	102.1	179	327.5	124.4	12.9	30.1	23.7	32.3	170.1	42.7	34.1
TRUE	High	Master Protein	Q9Y696	Chloride intracellular channel protein 4 OS=Homo sapiens OX=9606 GN=CLIC4 PE=1 SV=4	0	FALSE	125.342	71	16	379	15	1	253	28.8	5.59	8746	713.07	15	15	cell differentiation;cell organization and biogenesis;cellular homeostasis;metabolic process;regulation of biological process;response to stimulus;transport	cell surface;cytoplasm;cytoskeleton;cytosol;membrane;mitochondrion;nucleus	catalytic activity;protein binding;transporter activity	Pf00043, Pf13409, Pf13410, Pf13417, Pf14497	25932	ENSG00000169504.14	CLIC4	1				0	193	232.8	149	150.1	220.5	177.3	211.8	111.3	242.4	73.2	192.6	23.7	68.9	56.1	101.2	55.1	97.7	59.6
TRUE	High	Master Protein	P42224	Signal transducer and activator of transcription 1-alpha/beta OS=Homo sapiens OX=9606 GN=STAT1 PE=1 SV=2	0	FALSE	125.248	40	23	196	23	1	750	87.3	6.05	3541	243.84	22	18	cell death;cell differentiation;cell proliferation;cellular component movement;defense response;metabolic process;regulation of biological process;response to stimulus	cytoplasm;cytosol;nucleus	DNA binding;protein binding;signal transducer activity	Pf00017, Pf01017, Pf02864, Pf02865, Pf12162, Pf13204	6772	ENSG00000115415.18	STAT1	2	hsa04620; hsa04933; hsa04917; hsa05321; hsa05160; hsa04630; hsa05200; hsa05161; hsa05152; hsa04621; hsa04062; hsa04919; hsa04658; hsa05168; hsa05140; hsa05162; hsa05212; hsa05145; hsa04380; hsa05164	Toll-like receptor signaling pathway; AGE-RAGE signaling pathway in diabetic complications; Prolactin signaling pathway; Inflammatory bowel disease (IBD); Hepatitis C; Jak-STAT signaling pathway; Pathways in cancer; Hepatitis B; Tuberculosis; NOD-like receptor signaling pathway; Chemokine signaling pathway; Thyroid hormone signaling pathway; Th1 and Th2 cell differentiation; Herpes simplex infect…	Prolactin Signaling Pathway; IL-5 Signaling Pathway; Human Thyroid Stimulating Hormone (TSH) signaling pathway; IL-2 Signaling Pathway; Regulation of toll-like receptor signaling pathway; Interferon type I signaling pathways; Chemokine signaling pathway; TGF-beta Receptor Signaling; Allograft Rejection; EGF/EGFR Signaling Pathway; Brain-Derived Neurotrophic Factor (BDNF) signaling pathway; IL-4 S…	0	63.4	79.5	88.5	134.2	119.7	117.5	57.5	47.6	93.1	99.4	108.2	64.8	70.9	24.1	83.9	167.3	120	60.3
TRUE	High	Master Protein	O00571	ATP-dependent RNA helicase DDX3X OS=Homo sapiens OX=9606 GN=DDX3X PE=1 SV=3	0	FALSE	125.218	42	22	336	6	1	662	73.2	7.18	6560	410.63	22	20	cell death;cell organization and biogenesis;defense response;metabolic process;regulation of biological process;response to stimulus;transport	cytoplasm;cytosol;extracellular;membrane;mitochondrion;nucleus;organelle lumen	catalytic activity;DNA binding;enzyme regulator activity;nucleotide binding;protein binding;RNA binding	Pf00270, Pf00271, Pf04851	1654	ENSG00000215301.9	DDX3X	X	hsa04622; hsa05203; hsa05161	RIG-I-like receptor signaling pathway; Viral carcinogenesis; Hepatitis B	RIG-I-like Receptor Signaling	15	99	90	53.1	132.9	84	103.8	76.2	73.3	120	134	86.3	264.4	112.9	56.5	139.4	103	75.1	30.4
TRUE	High	Master Protein	Q9UQE7	Structural maintenance of chromosomes protein 3 OS=Homo sapiens OX=9606 GN=SMC3 PE=1 SV=2	0	FALSE	125.032	27	23	120	23	1	1217	141.5	7.18	2224	195.1	21	22	cell division;cell organization and biogenesis;metabolic process;regulation of biological process;response to stimulus;transport	chromosome;cytosol;nucleus	catalytic activity;motor activity;nucleotide binding;protein binding;transporter activity	Pf01496, Pf02463, Pf04111, Pf06470, Pf10168, Pf12128, Pf13304, Pf13476, Pf13555	9126	ENSG00000108055.9	SMC3	10	hsa04114; hsa04110	Oocyte meiosis; Cell cycle	Retinoblastoma (RB) in Cancer; Mecp2 and Associated Rett Syndrome	0	210.6	273.1	99.4	190.8	167.7	222.1	68.7	78.6	94.2	179.2	72.7	57	86.1	33.2	61.7	102.6	151.6	32.4
TRUE	High	Master Protein	P62879	Guanine nucleotide-binding protein G(I)/G(S)/G(T) subunit beta-2 OS=Homo sapiens OX=9606 GN=GNB2 PE=1 SV=3	0	FALSE	124.994	52	12	559	4	1	340	37.3	6	11923	865.66	12	12	metabolic process;regulation of biological process;response to stimulus	cytoplasm;cytosol;membrane	catalytic activity;protein binding;signal transducer activity	Pf00400	2783	ENSG00000172354.9	GNB2	7	hsa04726; hsa04151; hsa04014; hsa04723; hsa04713; hsa04728; hsa04062; hsa04727; hsa05032; hsa04725; hsa05034; hsa05200; hsa04724	Serotonergic synapse; PI3K-Akt signaling pathway; Ras signaling pathway; Retrograde endocannabinoid signaling; Circadian entrainment; Dopaminergic synapse; Chemokine signaling pathway; GABAergic synapse; Morphine addiction; Cholinergic synapse; Alcoholism; Pathways in cancer; Glutamatergic synapse	Chemokine signaling pathway; Calcium Regulation in the Cardiac Cell; G Protein Signaling Pathways; Focal Adhesion-PI3K-Akt-mTOR-signaling pathway; Corticotropin-releasing hormone signaling pathway; Myometrial Relaxation and Contraction Pathways	4	235.9	145.5	79.3	109.7	114.6	150.9	95	53.1	91.7	109	126.3	65.1	115	121.6	114	130.7	80.3	64.7
TRUE	High	Master Protein	P62136	Serine/threonine-protein phosphatase PP1-alpha catalytic subunit OS=Homo sapiens OX=9606 GN=PPP1CA PE=1 SV=1	0	FALSE	124.947	66	19	372	4	1	330	37.5	6.33	7174	538.62	19	17	cell division;metabolic process;regulation of biological process;response to stimulus	cytoplasm;cytosol;membrane;nucleus	catalytic activity;metal ion binding;protein binding	Pf00149	5499	ENSG00000172531.14	PPP1CA	11	hsa04390; hsa05034; hsa04728; hsa03015; hsa04720; hsa04611; hsa05031; hsa05168; hsa05205; hsa04024; hsa04270; hsa04261; hsa04750; hsa04921; hsa04114; hsa04022; hsa04810; hsa04931; hsa04910; hsa04510	Hippo signaling pathway; Alcoholism; Dopaminergic synapse; mRNA surveillance pathway; Long-term potentiation; Platelet activation; Amphetamine addiction; Herpes simplex infection; Proteoglycans in cancer; cAMP signaling pathway; Vascular smooth muscle contraction; Adrenergic signaling in cardiomyocytes; Inflammatory mediator regulation of TRP channels; Oxytocin signaling pathway; Oocyte meiosis; …	Nicotine Activity on Dopaminergic Neurons; Common Pathways Underlying Drug Addiction	1	100.4	83.2	76.6	119.3	46.2	36.2	21.6	393.1	54	129	34	8.9	32.4	29.7	34.5	89	115.6	12.5
TRUE	High	Master Protein	O43865	S-adenosylhomocysteine hydrolase-like protein 1 OS=Homo sapiens OX=9606 GN=AHCYL1 PE=1 SV=2	0	FALSE	124.849	36	20	427	5	1	530	58.9	6.89	7691	525.4	19	18	metabolic process;regulation of biological process;response to stimulus;transport	cytoplasm;cytosol;endoplasmic reticulum;membrane	catalytic activity;nucleotide binding;protein binding;RNA binding	Pf00670, Pf01262, Pf01488, Pf02254, Pf02826, Pf05221	10768	ENSG00000168710.17	AHCYL1	1	hsa00270; hsa01100	Cysteine and methionine metabolism; Metabolic pathways	Trans-sulfuration and one carbon metabolism; One carbon metabolism and related pathways	0	46.7	51.6	24.6	36.1	12	45.5	8.6	14.3	25.5	10.8	2.8	2	4.8	9.6	7.3	3.1	4.3	3
TRUE	High	Master Protein	P21589	5'-nucleotidase OS=Homo sapiens OX=9606 GN=NT5E PE=1 SV=1	0	FALSE	124.797	43	17	280	17	1	574	63.3	7.03	6078	369.95	17	15	metabolic process;regulation of biological process	cell surface;cytosol;membrane	catalytic activity;metal ion binding;nucleotide binding	Pf00149, Pf02872, Pf09587	4907	ENSG00000135318.11	NT5E	6	hsa01100; hsa00230; hsa00240; hsa00760	Metabolic pathways; Purine metabolism; Pyrimidine metabolism; Nicotinate and nicotinamide metabolism	Differentiation Pathway; NAD+ metabolism	0	115.6	123.7	124.6	81	70.6	164	35.6	112.6	166.6	123.2	127.7	15.5	63.4	42.9	78.9	31.3	72.7	25.5
TRUE	High	Master Protein	Q9NZ08	Endoplasmic reticulum aminopeptidase 1 OS=Homo sapiens OX=9606 GN=ERAP1 PE=1 SV=3	0	FALSE	124.751	34	27	218	27	1	941	107.2	6.46	3165	326.67	26	22	cell communication;cell differentiation;metabolic process;regulation of biological process;response to stimulus	cytoplasm;cytosol;endoplasmic reticulum;extracellular;membrane;organelle lumen	catalytic activity;metal ion binding;protein binding	Pf01433, Pf11838, Pf13485	51752	ENSG00000164307.12	ERAP1	5				0	84.5	104.7	54.3	205.4	85	135.2	111.7	182.2	76.6	79.7	72.2	107	63.7	23.9	50.3	85.2	116.5	54.8
TRUE	High	Master Protein	P40121	Macrophage-capping protein OS=Homo sapiens OX=9606 GN=CAPG PE=1 SV=2	0	FALSE	123.972	68	14	357	14	1	348	38.5	6.19	7541	562.76	13	14	cell organization and biogenesis;regulation of biological process	cytoplasm;extracellular;nucleus	protein binding	Pf00626	822	ENSG00000042493.15	CAPG	2			TYROBP Causal Network	0	275.8	175.6	74.4	187	81	93.3	15	31.4	171.5	162.6	196.9	248.5	66.3	17	180.1	72.8	95.3	36.3
TRUE	High	Master Protein	Q92599	Septin-8 OS=Homo sapiens OX=9606 GN=SEPT8 PE=1 SV=4	0	FALSE	123.732	49	19	288	14	1	483	55.7	6.28	4403	392.49	18	19		cytoplasm;cytoskeleton	nucleotide binding;protein binding	Pf00735	23176	ENSG00000164402.13	SEPT8	5	hsa05100	Bacterial invasion of epithelial cells		0	101.9	159.7	80.4	47.4	145.3	101.6	95.3	67	152.8	92.9	102.9	47.9	86.8	27.7	28.6	189.9	103.4	62
TRUE	High	Master Protein	P49591	Serine--tRNA ligase, cytoplasmic OS=Homo sapiens OX=9606 GN=SARS PE=1 SV=3	0	FALSE	123.726	41	16	237	16	1	514	58.7	6.43	5239	321.23	16	13	metabolic process;regulation of biological process	cytoplasm;cytosol;nucleus	catalytic activity;DNA binding;nucleotide binding;protein binding;RNA binding	Pf00587, Pf02403	6301	ENSG00000031698.12	SARS	1	hsa00970	Aminoacyl-tRNA biosynthesis		0	132.4	160.6	131.9	162.9	84.3	95.4	80.4	65.2	119.7	126.9	147.8	101	93.8	45.2	81	188.2	66.8	82.2
TRUE	High	Master Protein	O60763	General vesicular transport factor p115 OS=Homo sapiens OX=9606 GN=USO1 PE=1 SV=2	0	FALSE	123.647	31	23	238	23	1	962	107.8	4.91	4321	337.58	23	20	cell organization and biogenesis;metabolic process;transport	cytoplasm;cytosol;endoplasmic reticulum;Golgi;membrane	protein binding;RNA binding;transporter activity	Pf02403, Pf04111, Pf04869, Pf04871, Pf13166, Pf13514	8615	ENSG00000138768.14	USO1	4				0	59.2	89.8	46.3	117.5	83	86.6	92.3	411.6	81.8	97.9	49	183.2	43.2	28	90.3	127.7	53.3	57.3
TRUE	High	Master Protein	O14617	AP-3 complex subunit delta-1 OS=Homo sapiens OX=9606 GN=AP3D1 PE=1 SV=1	0	FALSE	123.601	25	21	145	21	1	1153	130.1	8.48	2480	229.26	20	18	cell organization and biogenesis;cellular component movement;metabolic process;regulation of biological process;transport	cytoplasm;Golgi;membrane	transporter activity	Pf01602, Pf06375	8943	ENSG00000065000.15	AP3D1	19	hsa04142	Lysosome		0	89.9	95.3	39.1	153.5	83.2	71.8	148.6	83.2	84.4	100.2	75.2	44.4	23.9	19.3	64.4	76.4	51	34.1
TRUE	High	Master Protein	O95460	Matrilin-4 OS=Homo sapiens OX=9606 GN=MATN4 PE=1 SV=3	0	FALSE	123.586	40	19	91	19	1	622	68.4	6.1	2217	151.06	19	16	cell organization and biogenesis	extracellular	metal ion binding;protein binding	Pf00092, Pf07645, Pf10393, Pf12662, Pf12947, Pf13519, Pf14670	8785	ENSG00000124159.15	MATN4	20				0	27.1	52.8	26.1	17.9	82.2	25.7	22.5	166.2	43.3	35.6	48.9	18.6	105.5	548.5	74.3	50	17.8	278.5
TRUE	High	Master Protein	P17600	Synapsin-1 OS=Homo sapiens OX=9606 GN=SYN1 PE=1 SV=3	0	FALSE	123.5	40	17	84	16	1	705	74.1	9.83	1498	125.37	17	16	cell communication;cell organization and biogenesis;regulation of biological process;transport	cytosol;Golgi;membrane	catalytic activity;nucleotide binding;protein binding;transporter activity	Pf02078, Pf02750, Pf08443, Pf10581	6853	ENSG00000008056.13	SYN1	X			Brain-Derived Neurotrophic Factor (BDNF) signaling pathway; Synaptic Vesicle Pathway; Monoamine Transport	1	27.8	28.8	12.8	43.4	48.6	19	10.9	22.1	14.4	80.4	15.9	13.1	30	14.2	16.9	618	18.5	29.7
TRUE	High	Master Protein	A0FGR8	Extended synaptotagmin-2 OS=Homo sapiens OX=9606 GN=ESYT2 PE=1 SV=1	0	FALSE	123.398	39	24	145	24	1	921	102.3	9.26	2525	187.62	24	20	metabolic process;transport	endoplasmic reticulum;membrane	metal ion binding;protein binding	Pf00168	57488		ESYT2	7				0	171.8	106.7	100.8	155.6	93.9	109	100.6	101.9	267.2	61.2	226.6	49.9	61.7	90.9	80.6	71	106.2	34.9
TRUE	High	Master Protein	P01042	Kininogen-1 OS=Homo sapiens OX=9606 GN=KNG1 PE=1 SV=2	0	FALSE	123.372	36	21	332	21	1	644	71.9	6.81	5987	477.63	21	19	cellular homeostasis;coagulation;defense response;metabolic process;regulation of biological process;response to stimulus;transport	extracellular;membrane;organelle lumen	enzyme regulator activity;metal ion binding;protein binding	Pf00031	3827	ENSG00000113889.11	KNG1	3	hsa04610	Complement and coagulation cascades	ACE Inhibitor Pathway; Complement and Coagulation Cascades	0	43.2	46.4	67.1	60.4	109.7	157	160.8	104.3	62.2	54	154.8	71.5	67	134.4	43.1	39.1	113.3	167
TRUE	High	Master Protein	P62873	Guanine nucleotide-binding protein G(I)/G(S)/G(T) subunit beta-1 OS=Homo sapiens OX=9606 GN=GNB1 PE=1 SV=3	0	FALSE	123.268	52	12	480	8	1	340	37.4	6	10316	762.65	12	12	cell death;cell organization and biogenesis;cell proliferation;cellular homeostasis;metabolic process;regulation of biological process;response to stimulus	cytosol;membrane	catalytic activity;protein binding;signal transducer activity	Pf00400	2782	ENSG00000078369.17	GNB1	1	hsa04713; hsa04744; hsa04725; hsa05034; hsa05200; hsa04740; hsa04726; hsa04062; hsa04727; hsa05032; hsa04724; hsa04728; hsa04151; hsa04014; hsa04723	Circadian entrainment; Phototransduction; Cholinergic synapse; Alcoholism; Pathways in cancer; Olfactory transduction; Serotonergic synapse; Chemokine signaling pathway; GABAergic synapse; Morphine addiction; Glutamatergic synapse; Dopaminergic synapse; PI3K-Akt signaling pathway; Ras signaling pathway; Retrograde endocannabinoid signaling	Focal Adhesion-PI3K-Akt-mTOR-signaling pathway; Corticotropin-releasing hormone signaling pathway; Nicotine Activity on Dopaminergic Neurons; Calcium Regulation in the Cardiac Cell; G Protein Signaling Pathways; Chemokine signaling pathway; Human Thyroid Stimulating Hormone (TSH) signaling pathway; Estrogen signaling pathway; Myometrial Relaxation and Contraction Pathways	4	89.2	120	89	117.1	102.7	137.9	120.4	68.5	152.4	126.8	65.8	62.5	89	54.9	87	147.2	55.6	74.8
TRUE	High	Master Protein	Q9UQ80	Proliferation-associated protein 2G4 OS=Homo sapiens OX=9606 GN=PA2G4 PE=1 SV=3	0	FALSE	123.225	52	18	213	18	1	394	43.8	6.55	3299	302.15	17	16	cell proliferation;metabolic process;regulation of biological process;transport	cytoplasm;extracellular;membrane;nucleus;organelle lumen	DNA binding;protein binding;RNA binding	Pf00557	5036	ENSG00000170515.13	PA2G4	12				0	199.8	162.2	50.5	165.4	89.1	180.7	69.3	96.7	65.4	119.3	105.3	75.3	96.7	40.5	120.1	80	94.3	42
TRUE	High	Master Protein	P05164	Myeloperoxidase OS=Homo sapiens OX=9606 GN=MPO PE=1 SV=1	0	FALSE	122.957	39	22	142	20	1	745	83.8	8.97	2861	161.09	22	17	cell organization and biogenesis;defense response;metabolic process;regulation of biological process;response to stimulus;transport	extracellular;mitochondrion;nucleus;organelle lumen;vacuole	antioxidant activity;catalytic activity;metal ion binding	Pf03098	4353	ENSG00000005381.7	MPO	17	hsa04145; hsa05202	Phagosome; Transcriptional misregulation in cancer	Vitamin B12 Metabolism; Selenium Micronutrient Network; Benzene metabolism; Folate Metabolism	2	25.9	23.5	30.2	54.4	18.1	26.2	20	30.3	14.5	22.3	27.3	677.6	91.1	38.4	107.5	29.8	166	46.6
TRUE	High	Master Protein	P15104	Glutamine synthetase OS=Homo sapiens OX=9606 GN=GLUL PE=1 SV=4	0	FALSE	122.411	50	16	324	16	1	373	42	6.89	6063	505.65	16	16	cell communication;cell organization and biogenesis;cell proliferation;metabolic process;regulation of biological process;response to stimulus;transport	cytoplasm;cytosol;endoplasmic reticulum;mitochondrion;nucleus	catalytic activity;metal ion binding;nucleotide binding;protein binding	Pf00120, Pf03951	2752	ENSG00000135821.17	GLUL	1	hsa04727; hsa04724; hsa01100; hsa01230; hsa00220; hsa00630; hsa00910; hsa00250	GABAergic synapse; Glutamatergic synapse; Metabolic pathways; Biosynthesis of amino acids; Arginine biosynthesis; Glyoxylate and dicarboxylate metabolism; Nitrogen metabolism; Alanine, aspartate and glutamate metabolism	TNF alpha Signaling Pathway; Amino Acid metabolism	0	131	25.7	37.7	220.5	97.9	33.8	186.2	38.5	18.3	56.7	25.6	93.2	220.6	43	23.7	120.9	104.3	60
TRUE	High	Master Protein	Q5T4S7	E3 ubiquitin-protein ligase UBR4 OS=Homo sapiens OX=9606 GN=UBR4 PE=1 SV=1	0	FALSE	122.277	8	30	89	30	1	5183	573.5	6.04	1424	74.89	29	15	metabolic process;transport	cytoplasm;cytoskeleton;cytosol;membrane;nucleus	catalytic activity;metal ion binding;protein binding	Pf02207, Pf13764	23352	ENSG00000127481.14	UBR4	1	hsa05203	Viral carcinogenesis		0	54.5	66.3	87.9	86.3	48.3	85.3	57.9	36.5	80.8	52.1	84.8	73.8	170.8	273.8	105.3	46.1	150.6	65.7
TRUE	High	Master Protein	Q12905	Interleukin enhancer-binding factor 2 OS=Homo sapiens OX=9606 GN=ILF2 PE=1 SV=2	0	FALSE	122.2	65	17	521	17	1	390	43	5.26	10332	693.25	17	15	metabolic process;regulation of biological process;response to stimulus;transport	cytoplasm;extracellular;membrane;nucleus;organelle lumen	catalytic activity;DNA binding;nucleotide binding;protein binding;RNA binding	Pf07528	3608	ENSG00000143621.16	ILF2	1			B Cell Receptor Signaling Pathway	0	112.5	152.2	72.4	170.2	68	144.7	72.1	79.9	101.3	109.5	105.2	80.2	75.5	24.9	126.8	178.4	87.8	43.1
TRUE	High	Master Protein	P48506	Glutamate--cysteine ligase catalytic subunit OS=Homo sapiens OX=9606 GN=GCLC PE=1 SV=2	0	FALSE	122.182	37	19	142	19	1	637	72.7	6.09	3235	169.39	18	16	cell organization and biogenesis;cellular homeostasis;metabolic process;regulation of biological process;response to stimulus	cytosol	catalytic activity;metal ion binding;nucleotide binding;protein binding	Pf03074	2729	ENSG00000001084.10	GCLC	6	hsa00270; hsa00480; hsa01100	Cysteine and methionine metabolism; Glutathione metabolism; Metabolic pathways	Transcriptional activation by NRF2; NRF2 pathway; Apoptosis-related network due to altered Notch3 in ovarian cancer; Trans-sulfuration and one carbon metabolism; Glutathione metabolism; One carbon metabolism and related pathways; Photodynamic therapy-induced NFE2L2 (NRF2) survival signaling; Aryl Hydrocarbon Receptor; Oxidative Stress	0	52.6	58.7	44.1	50	28.2	37	369.8	187.8	83.4	94.9	150.2	94.4	37.8	24.1	48.5	468.6	134.7	57.2
TRUE	High	Master Protein	Q9P266	Junctional protein associated with coronary artery disease OS=Homo sapiens OX=9606 GN=JCAD PE=1 SV=3	0	FALSE	122.122	21	20	144	20	1	1359	148.3	7.09	3306	212.58	18	19	regulation of biological process			Pf15351	57608	ENSG00000165757.8	KIAA1462; JCAD	10				0	219.9	261.9	60	140.7	92.1	179.1	159.7	271	378	198.2	146.6	52.7	20.5	24.2	17.3	74	76.4	18.5
TRUE	High	Master Protein	P04439	HLA class I histocompatibility antigen, A-3 alpha chain OS=Homo sapiens OX=9606 GN=HLA-A PE=1 SV=2	0	FALSE	121.288	58	18	265	3	1	365	40.8	6	4595	433.04	18	16	metabolic process;regulation of biological process;response to stimulus	cell surface;endoplasmic reticulum;Golgi;membrane	protein binding;RNA binding	Pf00129, Pf07654	3105	ENSG00000206503.12	HLA-A	6			Allograft Rejection; Proteasome Degradation	14	128.4	150.9	169	259.7	103.1	102.1	125.5	132.8	148.2	120	143.3	108.1	80.6	13.8	49.5	239.1	103.3	76.4
TRUE	High	Master Protein	P00441	Superoxide dismutase [Cu-Zn] OS=Homo sapiens OX=9606 GN=SOD1 PE=1 SV=2	0	FALSE	121.253	64	7	336	7	1	154	15.9	6.13	7516	941.3	7	6	cell organization and biogenesis;cellular component movement;cellular homeostasis;metabolic process;regulation of biological process;response to stimulus;transport	cytoplasm;cytosol;extracellular;membrane;mitochondrion;nucleus;organelle lumen;vacuole	antioxidant activity;catalytic activity;metal ion binding;protein binding	Pf00080	6647	ENSG00000142168.14	SOD1	21	hsa05020; hsa05014; hsa04213; hsa05016; hsa04146	Prion diseases; Amyotrophic lateral sclerosis (ALS); Longevity regulating pathway - multiple species; Huntington's disease; Peroxisome	Amyotrophic lateral sclerosis (ALS); AGE/RAGE pathway; Oxidative Stress; Selenium Micronutrient Network; One carbon metabolism and related pathways; Copper homeostasis; Dopamine metabolism; Vitamin B12 Metabolism; Folate Metabolism; Association Between Physico-Chemical Features and Toxicity Associated Pathways	0	183.1	151.2	28.1	120.4	129.9	213.5	146.2	74.7	144.2	211.5	37.5	48.8	75.7	37.9	72.9	83.9	66.5	84.7
TRUE	High	Master Protein	Q14126	Desmoglein-2 OS=Homo sapiens OX=9606 GN=DSG2 PE=1 SV=2	0	FALSE	121.215	28	20	194	20	1	1118	122.2	5.24	3565	273.27	20	19	cell death;cell organization and biogenesis;regulation of biological process;response to stimulus	cell surface;cytoskeleton;membrane	metal ion binding;protein binding	Pf00028, Pf01049	1829	ENSG00000046604.12	DSG2	18	hsa05412	Arrhythmogenic right ventricular cardiomyopathy (ARVC)	Arrhythmogenic Right Ventricular Cardiomyopathy	0	41.5	366.4	19.5	118.1	53	46.2	257.2	465.6	27.9	128.1	52.3	42.2	37	10.5	36.2	33.6	180	29.8
TRUE	High	Master Protein	P05155	Plasma protease C1 inhibitor OS=Homo sapiens OX=9606 GN=SERPING1 PE=1 SV=2	0	FALSE	121.127	40	19	282	19	1	500	55.1	6.55	5128	373.57	19	14	coagulation;defense response;metabolic process;regulation of biological process;response to stimulus;transport	extracellular;organelle lumen	enzyme regulator activity;protein binding	Pf00079	710	ENSG00000149131.15	SERPING1	11	hsa04610; hsa05133	Complement and coagulation cascades; Pertussis	Complement and Coagulation Cascades	0	45.5	28.9	55.1	59.5	81.4	45.6	78	100.6	48.3	52	96.3	93.7	114.8	287.6	48.6	102.2	107.4	312.5
TRUE	High	Master Protein	Q6ZMJ2	Scavenger receptor class A member 5 OS=Homo sapiens OX=9606 GN=SCARA5 PE=1 SV=1	0	FALSE	120.748	33	16	176	16	1	495	54	7.09	3610	291.58	16	13	cell organization and biogenesis;cellular homeostasis;regulation of biological process;response to stimulus;transport	cell surface;membrane	receptor activity	Pf00530, Pf01391	286133	ENSG00000168079.16	SCARA5	8				0	69.5	259.4	47.9	151	32.2	349.5	6.6	10.9	141.1	87.8	119.4	71.9	121.2	26.3	165.1	29.3	42.2	15.4
TRUE	High	Master Protein	P43686	26S proteasome regulatory subunit 6B OS=Homo sapiens OX=9606 GN=PSMC4 PE=1 SV=2	0	FALSE	120.724	63	21	245	21	1	418	47.3	5.21	3616	371.98	21	16	metabolic process;regulation of biological process;response to stimulus;transport	cytoplasm;cytosol;membrane;nucleus;proteasome	catalytic activity;nucleotide binding;protein binding;RNA binding	Pf00004, Pf00006, Pf00910, Pf01057, Pf01078, Pf05496, Pf07724, Pf07726, Pf07728, Pf13191	5704	ENSG00000281221.2; ENSG00000013275.7	PSMC4	19; CHR_HG2021_PATCH	hsa03050; hsa05169	Proteasome; Epstein-Barr virus infection	Parkin-Ubiquitin Proteasomal System pathway; Proteasome Degradation	0	134.3	162.9	122.7	194.9	132.4	126.7	113.3	86.5	141.7	163.6	89.9	40	47.9	43	60.4	58.5	66.6	23
TRUE	High	Master Protein	K7ENT6	Tropomyosin alpha-4 chain (Fragment) OS=Homo sapiens OX=9606 GN=TPM4 PE=1 SV=1	0	FALSE	120.414	66	20	429	2	1	179	20.6	4.61		1410.86		20				Pf00261, Pf12718		ENSG00000167460.14		19				0	28.9	34.6	3.9	55.2	19.5	10.7	26.7	55.2	23.4	44.5	1.8	163.3	107.6	58.8	137.8	44.8	24.3	48.7
TRUE	High	Master Protein	Q92973	Transportin-1 OS=Homo sapiens OX=9606 GN=TNPO1 PE=1 SV=2	0	FALSE	120.182	35	22	218	18	1	898	102.3	4.98	3600	304.85	20	19	cellular component movement;regulation of biological process;transport	cytoplasm;cytosol;membrane;nucleus	protein binding;RNA binding;transporter activity	Pf03810, Pf13513, Pf13646	3842	ENSG00000083312.17	TNPO1	5				4	235.3	178.8	112.3	151.7	82.4	127	67.2	78.4	137.9	108.9	155.5	111.1	51.4	24.3	89.5	126.3	54.1	30.6
TRUE	High	Master Protein	Q9Y2W1	Thyroid hormone receptor-associated protein 3 OS=Homo sapiens OX=9606 GN=THRAP3 PE=1 SV=2	0	FALSE	120.114	19	15	162	14	1	955	108.6	10.15	2710	288.55	14	15	metabolic process;regulation of biological process;response to stimulus	nucleus	DNA binding;nucleotide binding;protein binding;receptor activity;RNA binding	Pf15440	9967	ENSG00000054118.13	THRAP3	1			Interactome of polycomb repressive complex 2 (PRC2)	1	197.2	227.5	72.4	246.6	119.6	96.2	47.9	114.4	153	211.7	86.7	33	99.1	22	64.8	250.5	54.3	61.1
TRUE	High	Master Protein	P37802	Transgelin-2 OS=Homo sapiens OX=9606 GN=TAGLN2 PE=1 SV=3	0	FALSE	119.926	83	15	772	14	1	199	22.4	8.25	16590	1267.74	15	15	cell differentiation;transport	cytosol;extracellular	protein binding	Pf00307, Pf00402	8407	ENSG00000158710.14	TAGLN2	1				1	152.8	111.8	74.6	82.8	81.7	94.2	153	92.5	129.1	93.5	221.4	82	59.3	79.3	54	46.1	140.2	32.1
[truncated: 5,058 more rows]
[truncated: 107 more columns]

## Sheet: >=2 UNIQUE PEPTIDES
Checked	Protein FDR Confidence: Combined	Master	Accession	Description	Exp. q-value: Combined	Contaminant	Sum PEP Score	Coverage [%]	# Peptides	# PSMs	# Unique Peptides	# Protein Groups	# AAs	MW [kDa]	calc. pI	Score Mascot: Mascot	Score Sequest HT: Sequest HT	# Peptides (by Search Engine): Mascot	# Peptides (by Search Engine): Sequest HT	Biological Process	Cellular Component	Molecular Function	Pfam IDs	Entrez Gene ID	Ensembl Gene ID	Gene Symbol	Chromosome	KEGG Pathway Accessions	KEGG Pathways	WikiPathways	# Razor Peptides	Abundances (Scaled): F1: Sample	Abundances (Scaled): F2: Sample	Abundances (Scaled): F3: Sample	Abundances (Scaled): F4: Sample	Abundances (Scaled): F5: Sample	Abundances (Scaled): F6: Sample	Abundances (Scaled): F7: Sample	Abundances (Scaled): F8: Sample	Abundances (Scaled): F9: Sample	Abundances (Scaled): F10: Sample	Abundances (Scaled): F11: Sample	Abundances (Scaled): F12: Sample	Abundances (Scaled): F13: Sample	Abundances (Scaled): F14: Sample	Abundances (Scaled): F15: Sample	Abundances (Scaled): F16: Sample	Abundances (Scaled): F17: Sample	Abundances (Scaled): F18: Sample
[truncated: 5,659 more rows]
[truncated: 107 more columns]

[truncated: 2 more sheets: 18092018_LFQ_ALL_LABFINALSOP_AL, LOG2CONVERSION]
