# Supplementary material for: Comprehending Meningioma Signaling Cascades Using Multipronged Proteomics Approaches & Targeted Validation of Potential Markers
Source: Front Oncol. 2020 Aug 26;10:1600. doi: 10.3389/fonc.2020.01600 (PMC7482667; doi:10.3389/fonc.2020.01600)
Supplement: Supplementary file 6 [file Table_6.xlsx]

## Sheet: PROTEINS MODIFIED
Checked	Protein FDR Confidence: Combined	Master	Accession	Description	Exp. q-value: Combined	Sum PEP Score	Coverage [%]	# Peptides	# PSMs	# Unique Peptides	# Protein Groups	# AAs	MW [kDa]	calc. pI	Score Mascot: Mascot	Score Sequest HT: Sequest HT	# Peptides (by Search Engine): Mascot	# Peptides (by Search Engine): Sequest HT	# Razor Peptides	Abundances (Scaled): F1: Sample	Abundances (Scaled): F2: Sample	Abundances (Scaled): F3: Sample	Abundances (Scaled): F4: Sample	Abundances (Scaled): F5: Sample	Abundances (Scaled): F6: Sample	Abundances (Scaled): F7: Sample	Abundances (Scaled): F8: Sample	Abundances (Scaled): F9: Sample	Abundances (Scaled): F10: Sample	Abundances (Scaled): F11: Sample	Abundances (Scaled): F12: Sample	Abundances (Scaled): F13: Sample	Abundances (Scaled): F14: Sample	Abundances (Scaled): F15: Sample	Abundances (Scaled): F16: Sample	Abundances (Scaled): F17: Sample	Abundances (Scaled): F18: Sample	Abundances (Normalized): F1: Sample	Abundances (Normalized): F2: Sample	Abundances (Normalized): F3: Sample	Abundances (Normalized): F4: Sample	Abundances (Normalized): F5: Sample	Abundances (Normalized): F6: Sample	Abundances (Normalized): F7: Sample	Abundances (Normalized): F8: Sample	Abundances (Normalized): F9: Sample	Abundances (Normalized): F10: Sample	Abundances (Normalized): F11: Sample	Abundances (Normalized): F12: Sample
FALSE	High	Master Protein	Q09666	Neuroblast differentiation-associated protein AHNAK OS=Homo sapiens OX=9606 GN=AHNAK PE=1 SV=2	0	1588.82	75	294	2253	293	1	5890	628.7	6.15	47911	2581.92	287	230	1	32.4	95.5	288.2	392	137.5	24.2	78.3	72.8	32.1	47.3	69.4	115.5	79.2	116.2	105.2	33.7	55	25.5	9.87395e+09	2.90718e+10	8.77258e+10	1.19354e+11	4.18573e+10	7.35773e+09	2.38487e+10	2.21765e+10	9.75961e+09	1.44119e+10	2.11144e+10	3.51509e+10
	Checked	Confidence	Annotated Sequence	Modifications	Modifications in Master Proteins	# Protein Groups	# Proteins	# PSMs	Master Protein Accessions	Positions in Master Proteins	# Missed Cleavages	Theo. MH+ [Da]	# Razor Quan Results	Abundances (Scaled): F1: Sample	Abundances (Scaled): F2: Sample	Abundances (Scaled): F3: Sample	Abundances (Scaled): F4: Sample	Abundances (Scaled): F5: Sample	Abundances (Scaled): F6: Sample	Abundances (Scaled): F7: Sample	Abundances (Scaled): F8: Sample	Abundances (Scaled): F9: Sample	Abundances (Scaled): F10: Sample	Abundances (Scaled): F11: Sample	Abundances (Scaled): F12: Sample	Abundances (Scaled): F13: Sample	Abundances (Scaled): F14: Sample	Abundances (Scaled): F15: Sample	Abundances (Scaled): F16: Sample	Abundances (Scaled): F17: Sample	Abundances (Scaled): F18: Sample	Quan Info	Found in Sample: [S1] F1: Sample	Found in Sample: [S2] F2: Sample	Found in Sample: [S3] F3: Sample	Found in Sample: [S4] F4: Sample	Found in Sample: [S5] F5: Sample	Found in Sample: [S6] F6: Sample	Found in Sample: [S7] F7: Sample	Found in Sample: [S8] F8: Sample	Found in Sample: [S9] F9: Sample	Found in Sample: [S10] F10: Sample	Found in Sample: [S11] F11: Sample	Found in Sample: [S12] F12: Sample	Found in Sample: [S13] F13: Sample	Found in Sample: [S14] F14: Sample	Found in Sample: [S15] F15: Sample	Found in Sample: [S16] F16: Sample	Found in Sample: [S17] F17: Sample
	FALSE	High	[R].RVTAYTVDVTGR.[E]			1	1	4	Q09666	Q09666 [156-167]	1	1337.72	0		62.2	420.8	95.2		523.6		168.3	132.2			92.1			84			221.5		Not Found	Peak Found	Peak Found	High	Peak Found	High	Peak Found	Peak Found	Peak Found	Peak Found	Peak Found	Peak Found	Peak Found	Peak Found	Peak Found	Not Found	Not Found
	FALSE	High	[K].SEDGVEGDLGETQSR.[T]			1	1	5	Q09666	Q09666 [135-149]	0	1578.69	0	159.4	217.2		185.3	61.8		71.8	67.5	38.4		181.2	32.7	108.4	232.2	195.1	77.6	112.9	58.6		Peak Found	High	Not Found	Peak Found	Peak Found	Not Found	Peak Found	High	Peak Found	Not Found	Peak Found	Peak Found	Peak Found	Peak Found	High	Peak Found	Peak Found
	FALSE	High	[K].MYFPDVEFDIK.[S]			1	1	2	Q09666	Q09666 [5088-5098]	0	1403.66	0				1493.2				3.8	50.7	9.6			242.8							Not Found	Not Found	Not Found	High	Not Found	Not Found	Not Found	Peak Found	Peak Found	Peak Found	Not Found	Not Found	High	Not Found	Not Found	Not Found	Not Found
	FALSE	High	[K].LQGSGVSLASK.[K]			1	1	2	Q09666	Q09666 [5848-5858]	0	1046.58	0			1220.6		75.4		117			37.1	141.1	129.3		79.5						Not Found	Not Found	High	Not Found	Peak Found	Not Found	Peak Found	Not Found	Not Found	Peak Found	Peak Found	Peak Found	Not Found	Peak Found	Not Found	Not Found	Not Found
	FALSE	High	[K].LQGSGVSLASKK.[S]	1xPhospho [S10]	Q09666 1xPhospho [S5857]	1	1	1	Q09666	Q09666 [5848-5859]	1	1254.65	0			961.3		473.8							364.9								Not Found	Not Found	High	Not Found	Peak Found	Not Found	Not Found	Not Found	Not Found	Not Found	Not Found	Peak Found	Not Found	Not Found	Not Found	Not Found	Not Found
	FALSE	High	[K].LPQFGISTPGSDLHVNAK.[G]			1	1	3	Q09666	Q09666 [5408-5425]	0	1880.99	0			155.7	996.3		16.8	96.5	73.8	123.4			31	125.9		111.2		56.1	13.3		Not Found	Not Found	Peak Found	High	Not Found	Peak Found	Peak Found	Peak Found	Peak Found	Not Found	Not Found	Peak Found	Peak Found	Not Found	Peak Found	Not Found	Peak Found
	FALSE	High	[K].LPTGQISGPEIK.[G]			1	1	22	Q09666	Q09666 [5513-5524]	0	1239.69	0		6.5	279.1	627.4	54.7	34.2	76.1	62.7	72.1	29.3		85.7	208.1		138.3	12.7	51.5	61.5		Not Found	Peak Found	High	High	High	High	High	High	High	High	Not Found	High	High	Not Found	High	Peak Found	High
	FALSE	High	[R].LPSGSGAASPTGSAVDIR.[A]	2xPhospho [S/T]	Q09666 2xPhospho [S]	1	1	25	Q09666	Q09666 [208-225]	0	1802.77	0	40.6	23.2	1118.4	7.1	301.5		25.1	22	9.8	12.7	6.8	107.5		33.2	3	58.2	30.5	0.3		Peak Found	Peak Found	High	High	High	Not Found	Peak Found	High	High	High	Peak Found	High	Not Found	Peak Found	Peak Found	Peak Found	Peak Found
	FALSE	High	[R].LPSGSGAASPTGSAVDIR.[A]	1xPhospho [S/T]	Q09666 1xPhospho [S]	1	1	52	Q09666	Q09666 [208-225]	0	1722.81	0	35.3	345.5	773.8	13.8	128.2		22.5	12	1	24.8	12.1	254.4	3.5	21.2	0.5	4.5	142.4	4.6		High	High	High	High	High	Not Found	High	High	Peak Found	High	Peak Found	High	High	High	Peak Found	Peak Found	High
	FALSE	High	[R].LPSGSGAASPTGSAVDIR.[A]			1	1	11	Q09666	Q09666 [208-225]	0	1642.84	0		252.5	232.3	357.4	86.4	43.9	107.7	113.6	61.1	28.5		117.2	147.4		149.1		102.8			Not Found	High	High	Peak Found	Peak Found	Peak Found	High	High	Peak Found	High	Not Found	Peak Found	Peak Found	Not Found	Peak Found	Not Found	Peak Found
	FALSE	High	[R].ISMSEVDLNVAAPK.[V]	1xPhospho [S2]; 1xOxidation [M3]	Q09666 1xPhospho [S570]	1	1	3	Q09666	Q09666 [569-582]	0	1569.72	0	740.8		631.4				10.8					398						19		Peak Found	Not Found	High	Not Found	Not Found	Not Found	Peak Found	Not Found	Not Found	Not Found	Not Found	High	Not Found	Not Found	Not Found	Not Found	Not Found
	FALSE	High	[R].ISMSEVDLNVAAPK.[V]			1	1	4	Q09666	Q09666 [569-582]	0	1473.76	0				1505.7	49				16.8				228.5							Not Found	Not Found	Not Found	High	Peak Found	Not Found	Not Found	Not Found	Peak Found	Not Found	Not Found	Not Found	High	Not Found	Not Found	Not Found	Not Found
	FALSE	High	[K].ISMQDVDLSLGSPK.[L]	1xPhospho [S12]; 1xOxidation [M3]	Q09666 1xPhospho [S511]	1	1	1	Q09666	Q09666 [500-513]	0	1585.72	0		186.3	905.8	18.5					14.6	99.7		96.6	8.8	469.7						Not Found	Peak Found	High	Peak Found	Not Found	Not Found	Not Found	Not Found	Peak Found	Peak Found	Not Found	Peak Found	Peak Found	Peak Found	Not Found	Not Found	Not Found
	FALSE	High	[K].ISMQDVDLSLGSPK.[L]	1xOxidation [M3]		1	1	1	Q09666	Q09666 [500-513]	0	1505.75	0		40.4	133.2			24.3	69.2		46.3		1117.1	39	7.1		323.3					Not Found	Peak Found	High	Not Found	Not Found	Peak Found	Peak Found	Not Found	Peak Found	Not Found	Peak Found	Peak Found	Peak Found	Not Found	Peak Found	Not Found	Not Found
	FALSE	High	[K].ISMPGFKGEGPEVDVNLPK.[A]	1xOxidation [M3]		1	1	1	Q09666	Q09666 [3158-3176]; [3940-3958]	1	2030.03	0			183.8	205	64.8	187.3	270.4	466.7	40.7	16.6		234.4	45.6	44.8			40			Not Found	Not Found	Peak Found	Peak Found	Peak Found	Peak Found	Peak Found	High	Peak Found	Peak Found	Not Found	Peak Found	Peak Found	Peak Found	Not Found	Not Found	Peak Found
	FALSE	High	[K].ISMPGFKGEGPEVDVNLPK.[A]			1	1	4	Q09666	Q09666 [3158-3176]; [3940-3958]	1	2014.03	0		133.2		847.1		18.4	156.6	6.7		16.1		30	226.7		177.1		188.1			Not Found	Peak Found	Not Found	High	Not Found	Peak Found	Peak Found	Peak Found	Not Found	Peak Found	Not Found	Peak Found	High	Not Found	Peak Found	Not Found	Peak Found
	FALSE	High	[K].ISMPGFK.[G]			1	1	3	Q09666	Q09666 [2774-2780]; [3158-3164]; [3940-3946]	0	779.412	0				1800																Not Found	Not Found	Not Found	High	Not Found	Not Found	Not Found	Not Found	High	Not Found	Not Found	Not Found	High	Not Found	Not Found	Not Found	Not Found
	FALSE	High	[K].ISMPEVDLNLKGPK.[MV]			1	1	1	Q09666	Q09666 [4129-4142]; [4593-4606]	1	1540.84	0																			Not Reliable	Not Found	Not Found	Not Found	High	Not Found	Not Found	Not Found	Not Found	Not Found	Not Found	Not Found	Not Found	Not Found	Not Found	Not Found	Not Found	Not Found
	FALSE	High	[K].ISMPEVDLNLK.[G]			1	1	6	Q09666	Q09666 [4129-4139]; [4593-4603]	0	1258.67	1	67.4	114.7	16	964.8	19.6	173.1	10.2	11.2	78.1	5.9		9.3	123	9.7	23		15.2	158.9		Peak Found	Peak Found	Peak Found	High	Peak Found	High	Peak Found	Peak Found	Peak Found	Peak Found	Not Found	Peak Found	High	Peak Found	Peak Found	Not Found	Peak Found
	FALSE	High	[K].ISMPEIDLNLK.[G]			1	1	1	Q09666	Q09666 [3293-3303]	0	1272.69	0				1414.4			2.6		80.1	11.9		5	174.5	14.5	16.5	24.8	55.6			Not Found	Not Found	Not Found	High	Not Found	Not Found	Peak Found	Not Found	Peak Found	Peak Found	Not Found	Peak Found	Peak Found	Peak Found	Peak Found	Peak Found	Peak Found
	FALSE	High	[K].ISMPDVGLNLK.[A]			1	1	4	Q09666	Q09666 [1579-1589]	0	1186.65	0	18.8	483.5		25.6	12.8	73.5		6.8	240.5	30.4	191.9	60.2	286		309	43.4	17.5			Peak Found	Peak Found	Not Found	Peak Found	Peak Found	High	Not Found	Peak Found	High	Peak Found	Peak Found	Peak Found	High	Not Found	Peak Found	Peak Found	Peak Found
	FALSE	High	[KN].ISMPDVDLNLKGPK.[LI]			1	1	3	Q09666	Q09666 [1323-1336]; [2453-2466]	1	1526.82	0				1213.6	102.8				7.8	21.3			199		255.5					Not Found	Not Found	Not Found	High	Peak Found	Not Found	Not Found	Not Found	Peak Found	Peak Found	Not Found	Not Found	Peak Found	Not Found	Peak Found	Not Found	Not Found
	FALSE	High	[K].ISMPDVDLHVK.[G]			1	1	3	Q09666	Q09666 [697-707]	0	1253.66	0				1477	9.5	11.2		1.1	65.7	8.8		36.4	160.8		29.6					Not Found	Not Found	Not Found	High	Peak Found	Peak Found	Not Found	Peak Found	Peak Found	Peak Found	Not Found	Peak Found	High	Not Found	Peak Found	Not Found	Not Found
	FALSE	High	[K].ISIPDVGLHLK.[G]			1	1	6	Q09666	Q09666 [1451-1461]	0	1191.71	0	119.3	67.4	44.4	200.4	1069.9	19.1	27	45.8	22.9	8.5	3.5	28.5	86.7	25.4	19.6		3.7	7.9		Peak Found	Peak Found	Peak Found	High	Peak Found	High	Peak Found	Peak Found	Peak Found	Peak Found	Peak Found	Peak Found	High	Peak Found	Peak Found	Not Found	Peak Found
	FALSE	High	[K].ISIPDVDLDLKGPK.[V]			1	1	8	Q09666	Q09666 [4849-4862]	1	1509.85	0			121.6	607.6	47.2	4.4	42.6	89	13.3	19.5		60.6	337.7	47.1	229.3		23.7	156.3		Not Found	Not Found	High	High	Peak Found	Peak Found	Peak Found	High	Peak Found	Peak Found	Not Found	High	High	Peak Found	High	Not Found	Peak Found
	FALSE	High	[K].ISIPDVDLDLK.[G]			1	1	9	Q09666	Q09666 [4849-4859]	0	1227.68	0	1.8	105.7	133.6	478.6	53.7	41	127.4	6	169.2	19.1	21.2	164.6	181.1	140.6	3.1		44.7	108.4		Peak Found	High	Peak Found	Peak Found	Peak Found	Peak Found	High	High	Peak Found	Peak Found	Peak Found	High	High	Peak Found	Peak Found	Not Found	Peak Found
	FALSE	High	[K].ISMPDVDLHLKGPK.[V]	1xOxidation [M3]		1	1	1	Q09666	Q09666 [1195-1208]; [1653-1666]; [1855-1868]; [1922-1935]; [1989-2002]; [2117-2130]	1	1565.84	0						1037.7		170.3										592.1		Not Found	Not Found	Not Found	Not Found	Not Found	Peak Found	Not Found	High	Not Found	Not Found	Not Found	Not Found	Not Found	Not Found	Not Found	Not Found	Not Found
	FALSE	High	[K].ISMPDVDLHLKGPK.[V]			1	1	4	Q09666	Q09666 [1195-1208]; [1653-1666]; [1855-1868]; [1922-1935]; [1989-2002]; [2117-2130]	1	1549.84	0		13.9		1314.6		46.1		8.3			12.4	5.3	221.4	178.1						Not Found	Peak Found	Not Found	High	Not Found	High	Not Found	Peak Found	Not Found	Not Found	Peak Found	Peak Found	High	Peak Found	Not Found	Not Found	Not Found
	FALSE	High	[K].ISMPDVDLHLK.[G]	1xOxidation [M3]		1	1	2	Q09666	Q09666 [818-828]; [1195-1205]; [1653-1663]; [1855-1865]; [1922-1932]; [1989-1999]; [2117-2127]	0	1283.67	0			42.7	58.8			408.9	415.5	278.7	34.1	69.6	133.9			344.9			12.7		Not Found	Not Found	Peak Found	Peak Found	Not Found	Not Found	High	High	Peak Found	Peak Found	Peak Found	Peak Found	Not Found	Not Found	Peak Found	Not Found	Not Found
	FALSE	High	[K].ISMPDVDLHLK.[G]			1	1	7	Q09666	Q09666 [818-828]; [1195-1205]; [1653-1663]; [1855-1865]; [1922-1932]; [1989-1999]; [2117-2127]	0	1267.67	0	43.3		16.5	1306.9	7	34.2	6.3	14.4	97.7	25.7	14.9	11.8	137.6		24.2	6.6	14.4	38.4		Peak Found	Not Found	Peak Found	High	Peak Found	High	Peak Found	Peak Found	Peak Found	Peak Found	Peak Found	Peak Found	High	Not Found	Peak Found	Peak Found	Peak Found
	FALSE	High	[K].ISMPDIDLNLTGPK.[I]	1xOxidation [M3]		1	1	2	Q09666	Q09666 [2835-2848]	0	1529.79	0			815.2			31.8	243.8	328.5				95.7		79.8	109.1			96.2		Not Found	Not Found	Peak Found	Not Found	Not Found	Peak Found	High	Peak Found	Not Found	Not Found	Not Found	Peak Found	Not Found	Peak Found	Peak Found	Not Found	Not Found
	FALSE	High	[K].ISMPDIDLNLTGPK.[I]			1	1	4	Q09666	Q09666 [2835-2848]	0	1513.79	0		7.5	3	1364.3	15.4	2.6		5.8	95.5				268.1		12.9	24.8				Not Found	Peak Found	Peak Found	High	Peak Found	Peak Found	Not Found	Peak Found	Peak Found	Not Found	Not Found	Not Found	High	Not Found	Peak Found	Peak Found	Not Found
	FALSE	High	[K].ISMPDLDLNLKGPK.[VM]	1xOxidation [M3]		1	1	4	Q09666	Q09666 [2707-2720]; [3091-3104]; [3219-3232]; [3543-3556]; [3745-3758]; [3873-3886]; [4721-4734]	1	1556.84	0			73.7	98		263.1	268.1	503.5	85.1	39.7		133.2	16.6	10.2	266.5		19.1	23.2		Not Found	Not Found	Peak Found	Peak Found	Not Found	Peak Found	High	High	Peak Found	Peak Found	Not Found	Peak Found	Peak Found	Peak Found	Peak Found	Not Found	Peak Found
	FALSE	High	[K].ISMPDIDLNLKGPK.[VM]			1	1	16	Q09666	Q09666 [2707-2720]; [3091-3104]; [3219-3232]; [3543-3556]; [3745-3758]; [3873-3886]; [4721-4734]	1	1540.84	0			21	1252.8	4.2	24.9	23.1	8.2		2.8	4.1	134.4	150.4	21.1	70.8	11.5	53.9	16.7		Not Found	Not Found	Peak Found	High	Peak Found	High	Peak Found	Peak Found	Not Found	Peak Found	Peak Found	Peak Found	High	Peak Found	Peak Found	Peak Found	Peak Found
	FALSE	High	[K].ISMPDIDLNLK.[G]			1	1	26	Q09666	Q09666 [2707-2717]; [3091-3101]; [3219-3229]; [3543-3553]; [3745-3755]; [3873-3883]; [4721-4731]	0	1258.67	0		1.5	6.6	1149.8	60.7	8.2	74	107.9	147.5	2.6	6.7	55.8	161.5	1.3	4.7	2.5		8.6		Not Found	Peak Found	Peak Found	High	Peak Found	High	Peak Found	Peak Found	High	Peak Found	Peak Found	Peak Found	High	Peak Found	Peak Found	Peak Found	Peak Found
	FALSE	High	[K].ISMPDIDFNLK.[G]			1	1	4	Q09666	Q09666 [4385-4395]	0	1292.66	0				1468.3				5.8	112.1	16.2			163.2		11.7		22.7			Not Found	Not Found	Not Found	High	Not Found	Not Found	Not Found	Peak Found	Peak Found	Peak Found	Not Found	Not Found	High	Not Found	Peak Found	Not Found	Peak Found
	FALSE	High	[K].ISMPDFDLHLKGPK.[V]			1	1	3	Q09666	Q09666 [2579-2592]; [4001-4014]; [4257-4270]; [4459-4472]	1	1597.84	0				1179.2		95.2	98.9			88.8		64.6	152.9	90.3				30.2		Not Found	Not Found	Not Found	High	Not Found	Peak Found	Peak Found	Not Found	Not Found	Peak Found	Not Found	Peak Found	High	Peak Found	Not Found	Not Found	Not Found
	FALSE	High	[K].ISMPDFDLHLK.[G]			1	1	1	Q09666	Q09666 [2579-2589]; [4001-4011]; [4257-4267]; [4459-4469]	0	1315.67	0				56.8					564.9	127.1			964.7		86.4					Not Found	Not Found	Not Found	Peak Found	Not Found	Not Found	Not Found	Not Found	Peak Found	Peak Found	Not Found	Not Found	High	Not Found	Peak Found	Not Found	Not Found
	FALSE	High	[KN].ISMPDVDLNLK.[G]			1	1	6	Q09666	Q09666 [1323-1333]; [2453-2463]	0	1244.66	0				1449.6					162.1				165.8		22.4					Not Found	Not Found	Not Found	High	Not Found	Not Found	Not Found	Not Found	High	Not Found	Not Found	Not Found	High	Not Found	Peak Found	Not Found	Not Found
	FALSE	High	[K].LQVTMPGIK.[V]			1	1	2	Q09666	Q09666 [244-252]	0	986.57	0		12.9		1424.5				2.3	69	9.7			237.5		20.5			23.6		Not Found	Peak Found	Not Found	High	Not Found	Not Found	Not Found	Peak Found	High	Peak Found	Not Found	Not Found	Peak Found	Not Found	Peak Found	Not Found	Not Found
	FALSE	High	[R].ISAPNVDFNLEGPK.[V]	1xPhospho [S2]	Q09666 1xPhospho [S5448]	1	1	20	Q09666	Q09666 [5447-5460]	0	1580.74	0		310.1	554.1	18.9	297.4	4.9	68.7	16.7	1	15.2	4.7	355.1	0.9	104.5	3.9		38.3	5.5		Not Found	High	High	High	High	High	High	High	Peak Found	High	Peak Found	High	Peak Found	Peak Found	Peak Found	Not Found	High
	FALSE	High	[R].ISAPNVDFNLEGPK.[V]			1	1	8	Q09666	Q09666 [5447-5460]	0	1500.77	0			301	576.3	119.5		92.9	73.6	64			96.9	233.2	79.1	127.4		36			Not Found	Not Found	Peak Found	Peak Found	Peak Found	High	Peak Found	High	High	Peak Found	Peak Found	High	High	Peak Found	Peak Found	Not Found	Peak Found
	FALSE	High	[K].LPDMSVK.[T]			1	1	1	Q09666	Q09666 [687-693]	0	789.418	0			103.2	1431.7		24.1	18.9			14				17.8	48.3	141.9				Not Found	Not Found	Peak Found	High	Not Found	Peak Found	Peak Found	Not Found	Not Found	Peak Found	Not Found	Not Found	Not Found	Peak Found	Peak Found	Peak Found	Not Found
	FALSE	High	[K].LNVGAPDVTLR.[G]			1	1	11	Q09666	Q09666 [5356-5366]	0	1154.65	0			200	730.8	45.7	65.8	67.3	65.2	68.2	30		73.1	184.6	58.7	103.7			106.8		Not Found	Not Found	High	High	Peak Found	High	High	High	Peak Found	Peak Found	Not Found	Peak Found	High	High	Peak Found	Not Found	Not Found
	FALSE	High	[K].MDAEVPDVNIEGPDAK.[L]	1xOxidation [M1]		1	1	2	Q09666	Q09666 [1418-1433]	0	1715.78	0				60.1			764.9	729.2							245.8					Not Found	Not Found	Not Found	Peak Found	Not Found	Not Found	Peak Found	High	Not Found	Not Found	Not Found	Not Found	Not Found	Not Found	Peak Found	Not Found	Not Found
	FALSE	High	[K].MDAEVPDVNIEGPDAK.[L]			1	1	6	Q09666	Q09666 [1418-1433]	0	1699.78	1	43.9		66.2	894.8					26	46.4			111.9	318	159.3	133.5				Peak Found	Not Found	Peak Found	High	Not Found	Not Found	Not Found	Not Found	Peak Found	Peak Found	Not Found	Not Found	High	Peak Found	High	Peak Found	Not Found
	FALSE	High	[K].MDIDVPDVEVQGPDWHLK.[M]			1	1	6	Q09666	Q09666 [859-876]	0	2093	0				1498.3					95.1	13.6			193.1							Not Found	Not Found	Not Found	High	Not Found	Not Found	Not Found	Not Found	Peak Found	Peak Found	Not Found	Not Found	High	Not Found	Not Found	Not Found	Not Found
	FALSE	High	[K].MDIDAPDVEVQGPDWHLK.[M]			1	1	7	Q09666	Q09666 [1236-1253]	0	2064.97	0	55.6		83.3	863.8	358.6				119.1	11.3		23.2	280.1				3	2		Peak Found	Not Found	Peak Found	High	Peak Found	Not Found	Not Found	Not Found	Peak Found	Peak Found	Not Found	Peak Found	High	Not Found	Not Found	Not Found	Peak Found
	FALSE	High	[K].MDIDAPDVDVHGPDWHLK.[M]			1	1	2	Q09666	Q09666 [2030-2047]	0	2059.95	0				1534.9					85.6	22.4	110.2	47								Not Found	Not Found	Not Found	High	Not Found	Not Found	Not Found	Not Found	Peak Found	Peak Found	Peak Found	Peak Found	Not Found	Not Found	Not Found	Not Found	Not Found
	FALSE	High	[K].MDVNVGDIDIEGPEGK.[L]			1	1	6	Q09666	Q09666 [1620-1635]	0	1687.78	0		55.7	45.1	1134.9	31.1	53.7			9	59.6		35.4	315.1	43.6				16.7		Not Found	Peak Found	Peak Found	High	Peak Found	High	Not Found	Not Found	Peak Found	Peak Found	Not Found	Peak Found	High	Peak Found	Not Found	Not Found	Not Found
	FALSE	High	[K].MDVNVGDIDIEGPEGK.[L]	1xOxidation [M1]		1	1	2	Q09666	Q09666 [1620-1635]	0	1703.78	0		45.9	426.4	30.3		91	227.1	316.8	21.1			161.4	6.5	261.9	57.3		81.3	73		Not Found	Peak Found	Peak Found	Peak Found	Not Found	Peak Found	Peak Found	High	Peak Found	Not Found	Not Found	Peak Found	Peak Found	Peak Found	Peak Found	Not Found	Peak Found
	FALSE	High	[K].MEGGGAEVHAQLPSLEGDLR.[G]	1xOxidation [M1]		1	1	1	Q09666	Q09666 [5248-5267]	0	2081.99	0							631.4	442.7				498.9					141.7	85.3		Not Found	Not Found	Not Found	Not Found	Not Found	Not Found	Peak Found	High	Not Found	Not Found	Not Found	Peak Found	Not Found	Not Found	Not Found	Not Found	Peak Found
	FALSE	High	[K].MEGGGAEVHAQLPSLEGDLR.[G]			1	1	4	Q09666	Q09666 [5248-5267]	0	2066	0																			Not Reliable	Not Found	Not Found	Not Found	High	Not Found	Not Found	Not Found	Not Found	Not Found	Not Found	Not Found	Not Found	Not Found	Not Found	Not Found	Not Found	Not Found
	FALSE	High	[K].MEGDLKGPEVDIKGPK.[V]			1	1	2	Q09666	Q09666 [3770-3785]	2	1712.89	0				1161.2				100.3					102.8	72.3	363.4					Not Found	Not Found	Not Found	High	Not Found	Not Found	Not Found	Peak Found	Not Found	Not Found	Not Found	Not Found	Peak Found	Peak Found	Peak Found	Not Found	Not Found
	FALSE	High	[K].MEGDLKGPEVDIK.[G]			1	1	1	Q09666	Q09666 [3770-3782]	1	1430.72	0				1759					17.2	12.1					11.8					Not Found	Not Found	Not Found	High	Not Found	Not Found	Not Found	Not Found	Peak Found	Peak Found	Not Found	Not Found	Not Found	Not Found	Peak Found	Not Found	Not Found
	FALSE	High	[K].MEGDLKAPEVDIKGPK.[V]			1	1	1	Q09666	Q09666 [4026-4041]	2	1726.9	0	119.9	66.4	285	396.5	46.1	56.1	21	36		8.6	49.2			427.3		287.9				Peak Found	Peak Found	Peak Found	High	Peak Found	Peak Found	Peak Found	Peak Found	Not Found	Peak Found	Peak Found	Not Found	Not Found	Peak Found	Not Found	Peak Found	Not Found
	FALSE	High	[K].MEGDLKAPEVDIK.[G]			1	1	2	Q09666	Q09666 [4026-4038]	1	1444.74	0				470.3					937.6				272.4	64.1			55.7			Not Found	Not Found	Not Found	High	Not Found	Not Found	Not Found	Not Found	Peak Found	Not Found	Not Found	Not Found	Peak Found	Peak Found	Not Found	Not Found	Peak Found
	FALSE	High	[K].MSLPDVDLDLKGPK.[M]	1xPhospho [S2]; 1xOxidation [M1]	Q09666 1xPhospho [S1068]	1	1	2	Q09666	Q09666 [1067-1080]	1	1623.77	0			1420.5	19.3					14			317.8				14.7		13.7		Not Found	Not Found	High	Peak Found	Not Found	Not Found	Not Found	Not Found	Peak Found	Not Found	Not Found	Peak Found	Not Found	Not Found	Not Found	Peak Found	Not Found
	FALSE	High	[K].MSLPDVDLDLKGPK.[M]			1	1	2	Q09666	Q09666 [1067-1080]	1	1527.81	0				1321.8				7.7	13.4	16.1			348.6		92.4					Not Found	Not Found	Not Found	High	Not Found	Not Found	Not Found	Peak Found	Peak Found	Peak Found	Not Found	Not Found	High	Not Found	Peak Found	Not Found	Not Found
	FALSE	High	[K].MSLPDVDLDLK.[G]	1xPhospho [S2]; 1xOxidation [M1]	Q09666 1xPhospho [S1068]	1	1	2	Q09666	Q09666 [1067-1077]	0	1341.6	0			1086.2									713.8								Not Found	Not Found	High	Not Found	Not Found	Not Found	Not Found	Not Found	Not Found	Not Found	Not Found	Peak Found	Not Found	Not Found	Not Found	Not Found	Not Found
	FALSE	High	[K].MSLPDVDLDLK.[G]	1xPhospho [S2]	Q09666 1xPhospho [S1068]	1	1	1	Q09666	Q09666 [1067-1077]	0	1325.61	0			1424	214.9	42.6							118.5								Not Found	Not Found	High	Peak Found	Peak Found	Not Found	Not Found	Not Found	Not Found	Not Found	Not Found	Peak Found	Not Found	Not Found	Not Found	Not Found	Not Found
	FALSE	High	[K].MSLPDVDLDLK.[G]			1	1	1	Q09666	Q09666 [1067-1077]	0	1245.64	0				1159.1			27.2	29	230	17.6	87.5	9.8	197.8	41.9						Not Found	Not Found	Not Found	High	Not Found	Not Found	Peak Found	Peak Found	Peak Found	Peak Found	Peak Found	Peak Found	Peak Found	Peak Found	Not Found	Not Found	Not Found
	FALSE	High	[K].MPTFSTPGAK.[G]			1	1	3	Q09666	Q09666 [633-642]	0	1036.51	0		155.7		902.4			57.2	109.9	134.7	29.8		108.8	196.2	2.8			88.7	13.8		Not Found	Peak Found	Not Found	High	Not Found	Not Found	Peak Found	Peak Found	Peak Found	Peak Found	Not Found	Peak Found	High	Peak Found	Not Found	Not Found	Peak Found
	FALSE	High	[K].MPSMNIQTHK.[I]			1	1	3	Q09666	Q09666 [1569-1578]	0	1186.57	0		136.5	85.5	1074.7		57.8				20.1	131	25	10.6	62.5	33.6	19.3	107.9	35.6		Peak Found	Peak Found	Peak Found	High	Not Found	Peak Found	Not Found	Peak Found	Peak Found	Peak Found	Peak Found	Peak Found	Peak Found	Peak Found	Peak Found	Peak Found	Peak Found
	FALSE	High	[K].MPSLEISAPK.[V]			1	1	3	Q09666	Q09666 [4906-4915]	0	1072.57	0		3.9	46.3	1349.2		0.7		12.6	257.2				116.9	13.3						Not Found	Peak Found	Peak Found	High	Not Found	Peak Found	Not Found	Peak Found	Peak Found	Not Found	Not Found	Not Found	High	Peak Found	Not Found	Not Found	Not Found
	FALSE	High	[K].MPFLSISSPK.[V]			1	1	1	Q09666	Q09666 [3405-3414]	0	1106.59	0				1472.8				4	86	9.4			182.6		36.9		3.6	4.6		Not Found	Not Found	Not Found	High	Not Found	Not Found	Not Found	Peak Found	Peak Found	Peak Found	Not Found	Not Found	Peak Found	Not Found	Peak Found	Not Found	Peak Found
	FALSE	High	[K].MPEMSIKPQK.[I]			1	1	1	Q09666	Q09666 [1441-1450]	0	1188.61	0				1425.7		351.7												22.6		Not Found	Not Found	Not Found	High	Not Found	Peak Found	Not Found	Not Found	Not Found	Not Found	Not Found	Not Found	Not Found	Not Found	Not Found	Not Found	Not Found
	FALSE	High	[K].MPEMNIK.[VA]			1	1	1	Q09666	Q09666 [808-814]; [936-942]; [2569-2575]; [2697-2703]; [2953-2959]; [3081-3087]; [3209-3215]; [3661-3667]; [3863-3869]; [3991-3997]; [4247-4253]; [4375-4381]; [4449-4455]	0	862.416	0		19.9		1738.6			0.6	1	3.3	6.6	8.8	1.1			17.6		2.6			Not Found	Peak Found	Not Found	High	Not Found	Not Found	Peak Found	Peak Found	Peak Found	Peak Found	Peak Found	Peak Found	Not Found	Not Found	Peak Found	Not Found	Peak Found
	FALSE	High	[K].MPEMHFR.[A]			1	1	2	Q09666	Q09666 [1057-1063]	0	947.423	0		14.3	105	111.5						4	5.3				1534.1	5.4	20.4			Not Found	Peak Found	Peak Found	High	Not Found	Not Found	Not Found	Not Found	Not Found	Peak Found	Peak Found	Not Found	Not Found	Not Found	Peak Found	Peak Found	Peak Found
	FALSE	High	[K].MPEMHFK.[TA]			1	1	1	Q09666	Q09666 [1185-1191]; [1313-1319]; [1643-1649]; [1845-1851]; [1979-1985]; [2107-2113]; [2174-2180]; [2302-2308]; [2825-2831]	0	919.416	0			26.6	1335.7			47.4	149		69.9				30.7	47.5		53.5	39.7		Not Found	Not Found	Peak Found	High	Not Found	Not Found	Peak Found	Peak Found	Not Found	Peak Found	Not Found	Not Found	Not Found	Peak Found	Peak Found	Not Found	Peak Found
	FALSE	High	[K].MPEINIK.[A]			1	1	1	Q09666	Q09666 [4839-4845]	0	844.46	1		66.9	236.6		29.5	76.5			348.2	71.3		99.3	220	35.3	204.9			411.5		Not Found	Peak Found	Peak Found	Not Found	Peak Found	Peak Found	Not Found	Not Found	Peak Found	Peak Found	Not Found	Peak Found	High	Peak Found	Peak Found	Not Found	Not Found
	FALSE	High	[K].MPDMHFK.[A]			1	1	1	Q09666	Q09666 [1912-1918]; [2376-2382]; [2443-2449]	0	905.401	0		25.9	22.2	1589.3							87.2			29.2	32		14.2			Not Found	Peak Found	Peak Found	High	Not Found	Not Found	Not Found	Not Found	Not Found	Not Found	Peak Found	Not Found	Not Found	Peak Found	Peak Found	Not Found	Peak Found
	FALSE	High	[K].MKLPQFGISTPGSDLHVNAK.[G]			1	1	1	Q09666	Q09666 [5406-5425]	1	2140.12	0				1653.9									146.1							Not Found	Not Found	Not Found	High	Not Found	Not Found	Not Found	Not Found	Not Found	Not Found	Not Found	Not Found	Peak Found	Not Found	Not Found	Not Found	Not Found
	FALSE	High	[K].MKGEVDVSLANVEGDLKGPALDIK.[G]			1	1	3	Q09666	Q09666 [3233-3256]	2	2498.32	0				1197.4		22.8		153.3					327.2		99.2					Not Found	Not Found	Not Found	High	Not Found	Peak Found	Not Found	Peak Found	Not Found	Not Found	Not Found	Not Found	High	Not Found	Peak Found	Not Found	Not Found
	FALSE	High	[K].MKGEVDVSLANVEGDLK.[G]			1	1	1	Q09666	Q09666 [3233-3249]	1	1803.92	0																			No Quan Values	Not Found	Not Found	Not Found	High	Not Found	Not Found	Not Found	Not Found	Not Found	Not Found	Not Found	Not Found	Not Found	Not Found	Not Found	Not Found	Not Found
	FALSE	High	[K].MKGDYDVTVPK.[V]			1	1	2	Q09666	Q09666 [1465-1475]	1	1252.62	0				1502	15.1		30.8	6					85.8	20.5	7	50.7		82		Not Found	Not Found	Not Found	High	Peak Found	Not Found	Peak Found	Peak Found	Not Found	Not Found	Not Found	Not Found	Peak Found	Peak Found	Peak Found	Peak Found	Not Found
	FALSE	High	[K].MPDMNIK.[A]			1	1	1	Q09666	Q09666 [3533-3539]	0	848.4	0	216.2	14.3		894.9		3.1			582.9									88.6		Peak Found	Peak Found	Not Found	High	Not Found	Peak Found	Not Found	Not Found	Peak Found	Not Found	Not Found	Not Found	Not Found	Not Found	Not Found	Not Found	Not Found
	FALSE	High	[K].VKTPEMIIQKPK.[I]			1	1	1	Q09666	Q09666 [488-499]	1	1411.83	0			53.2	347.7			61.8	60.3				134.6		1142.6						Not Found	Not Found	Peak Found	High	Not Found	Not Found	Peak Found	Peak Found	Not Found	Not Found	Not Found	Peak Found	Not Found	Peak Found	Not Found	Not Found	Not Found
	FALSE	High	[K].VKGGVDVTLPR.[V]			1	1	7	Q09666	Q09666 [583-593]	1	1140.67	0			86.8	784.4		81.8	100	141.8	21.1	18.6		169.3	294.6	11.5	83.5			6.7		Not Found	Not Found	Peak Found	High	Not Found	High	Peak Found	High	Peak Found	Peak Found	Not Found	Peak Found	High	Peak Found	Peak Found	Not Found	Not Found
	FALSE	High	[K].VKGEYDVTVPK.[L]			1	1	2	Q09666	Q09666 [711-721]	1	1234.67	0			180.9	722.4	53.3	11.5	122.9	120	26.8	40.6		146.7	103.6	69.7	117	49.6	24.9	10.3		Not Found	Not Found	Peak Found	High	Peak Found	Peak Found	High	Peak Found	Peak Found	Peak Found	Not Found	Peak Found	Peak Found	Peak Found	Peak Found	Peak Found	Peak Found
	FALSE	High	[K].VKGDVDVTLPK.[V]			1	1	5	Q09666	Q09666 [4735-4745]	1	1170.67	0			310	657		151.2		103.6	41.4	36		131.7	114.5	71	112.2		9.9	61.5		Not Found	Peak Found	Peak Found	High	Peak Found	High	Peak Found	Peak Found	Peak Found	Peak Found	Not Found	Peak Found	High	Peak Found	Peak Found	Not Found	Peak Found
	FALSE	High	[K].VKGDVDVSVPK.[VL]			1	1	21	Q09666	Q09666 [1209-1219]; [1936-1946]	1	1142.64	0		115.5	161.2	556.1	47.4	77.3	87	90	37.1	23.7	26.7	96.5	221.5	71.2	112.6		28.7	47.4		Not Found	High	High	High	Peak Found	High	Peak Found	High	Peak Found	High	Peak Found	High	High	Peak Found	High	Not Found	Peak Found
	FALSE	High	[K].VKGDVDVSLPK.[LVM]			1	1	16	Q09666	Q09666 [2131-2141]; [2593-2603]; [2721-2731]; [3759-3769]; [4015-4025]; [4271-4281]; [4399-4409]; [4473-4483]	1	1156.66	0	11.4	40.9	272.5	482.3	51.5	81.2	119.6	85.6	53.2	38.5		140.5	134.7	83.5	135.1		20	49.7		Peak Found	High	Peak Found	High	Peak Found	High	High	High	High	Peak Found	Not Found	Peak Found	High	Peak Found	High	Not Found	Peak Found
	FALSE	High	[K].VKGDVDISLPK.[VL]			1	1	4	Q09666	Q09666 [2977-2987]; [3557-3567]	1	1170.67	0				986.6	54.4		81.6	89.3	86.1	40.5		180.2	202.2		47.6		31.5			Not Found	Peak Found	High	High	Peak Found	Not Found	Peak Found	Peak Found	Peak Found	Peak Found	Not Found	Peak Found	Peak Found	Peak Found	Peak Found	Not Found	Peak Found
	FALSE	High	[K].VKVPEVDVR.[G]			1	1	7	Q09666	Q09666 [598-606]	1	1040.61	0	9.6	212.7	273.7	536.5	31.7	6.1	92	113.4	34.8	35.8	10	94.7	80.8	88.2	79.8			100.3		Peak Found	Peak Found	Peak Found	High	Peak Found	High	High	High	Peak Found	Peak Found	Peak Found	Peak Found	High	Peak Found	Peak Found	Not Found	Peak Found
	FALSE	High	[K].VKGDMDVSVPK.[V]			1	1	3	Q09666	Q09666 [1667-1677]; [2003-2013]; [2198-2208]	1	1174.61	0		448.9		898.7	69.3		27	42.5	19.7	10.4		7.3	118.5		35.2		55.5	67		Not Found	Peak Found	Not Found	High	Peak Found	Not Found	Peak Found	Peak Found	Peak Found	Peak Found	Not Found	Peak Found	High	Not Found	Peak Found	Not Found	Peak Found
	FALSE	High	[K].VKGDMDVSLPK.[V]	1xOxidation [M5]		1	1	1	Q09666	Q09666 [3105-3115]; [3887-3897]	1	1204.62	0		111.9					263.4	291.4			968.3	165.1								Not Found	Peak Found	Not Found	Not Found	Not Found	Not Found	High	Peak Found	Not Found	Not Found	Peak Found	Peak Found	Not Found	Not Found	Not Found	Not Found	Not Found
	FALSE	High	[K].VKGDLDIAGPNLEGDFKGPK.[V]			1	1	2	Q09666	Q09666 [3429-3448]	2	2070.09	0				1148	132		97.1	143.2							209.8		69.8			Not Found	Not Found	Not Found	High	Peak Found	Not Found	Peak Found	Peak Found	Not Found	Not Found	Not Found	Not Found	Not Found	Not Found	Peak Found	Not Found	Peak Found
	FALSE	High	[K].VKGDLDIAGPNLEGDFK.[G]			1	1	2	Q09666	Q09666 [3429-3445]	1	1787.92	0				425.7	102.8		459.3	322.4		20.3		309.9	18.6	45.1	41.7		54.2			Not Found	Not Found	Not Found	High	Peak Found	Not Found	High	Peak Found	Not Found	Peak Found	Not Found	Peak Found	Peak Found	Peak Found	Peak Found	Not Found	Peak Found
	FALSE	High	[K].VKGDFDVSVPK.[V]			1	1	1	Q09666	Q09666 [4863-4873]	1	1190.64	0																			No Quan Values	Not Found	Not Found	Not Found	High	Not Found	Peak Found	Peak Found	Peak Found	Peak Found	Peak Found	Not Found	Peak Found	Peak Found	Peak Found	Peak Found	Not Found	Peak Found
	FALSE	High	[K].VKGDADVSVPKLEGDLTGPSVGVEVPDVELECPDAK.[L]	1xCarbamidomethyl [C32]		1	1	1	Q09666	Q09666 [1869-1904]	2	3720.85	1				262.8				9	587.3	357.4			517.4	36.2			30.1			Not Found	Not Found	Not Found	High	Not Found	Not Found	Not Found	Peak Found	Peak Found	Peak Found	Not Found	Not Found	Peak Found	Peak Found	Not Found	Not Found	Peak Found
	FALSE	High	[K].VKGDADVSVPK.[L]			1	1	1	Q09666	Q09666 [1869-1879]	1	1114.61	0																			No Quan Values	Not Found	Not Found	Not Found	High	Not Found	Not Found	Not Found	Not Found	Not Found	Not Found	Not Found	Not Found	Not Found	Not Found	Not Found	Not Found	Not Found
	FALSE	High	[K].VKGDMDVSLPK.[V]			1	1	3	Q09666	Q09666 [3105-3115]; [3887-3897]	1	1188.63	0		39.5		1694.6					54.5			6.1			5.3					Not Found	Peak Found	Not Found	High	Not Found	Not Found	Not Found	Not Found	Peak Found	Not Found	Not Found	Peak Found	High	Not Found	Peak Found	Not Found	Not Found
	FALSE	High	[K].VPEVDVR.[G]			1	1	3	Q09666	Q09666 [600-606]	0	813.446	0	47.6	183.3	469.2		353.8	9.2		144.9	27.8			22.5			92.8		268.2	180.7		Peak Found	Peak Found	Peak Found	Not Found	Peak Found	Peak Found	Not Found	High	Peak Found	Not Found	Not Found	Peak Found	Not Found	Not Found	High	Not Found	High
	FALSE	High	[K].VPDVEIK.[SG]			1	1	10	Q09666	Q09666 [849-855]; [1226-1232]	0	799.456	0	40	297		62.9		148.5	281.4	243.9	135.2		8.8	135.9	2.6	105	64.1	34.9	239.7			Peak Found	High	Not Found	High	Not Found	Peak Found	High	High	Peak Found	Not Found	Peak Found	Peak Found	Peak Found	Peak Found	Peak Found	Peak Found	High
	FALSE	High	[QK].VPDVDIR.[G]			1	1	2	Q09666	Q09666 [1098-1104]; [2215-2221]	0	813.446	1			127.4	287.3	184.7	35.2	173.3	97	9.6	18.6	349.8		2.5	212.6	33		148.1	120.8		Not Found	Not Found	Peak Found	High	Peak Found	Peak Found	Peak Found	Peak Found	Peak Found	Peak Found	Peak Found	Not Found	Peak Found	Peak Found	High	Not Found	Peak Found
	FALSE	High	[K].VPDVDIKGPK.[VM]			1	1	3	Q09666	Q09666 [1354-1363]; [1684-1693]; [2020-2029]; [3122-3131]	1	1067.61	0		11.7	146.4	471	11.9			271.5		60.3		71.1			690	10.4	55.6			Not Found	Peak Found	Peak Found	High	Peak Found	Not Found	Not Found	High	Not Found	Peak Found	Not Found	Peak Found	Not Found	Not Found	High	Peak Found	Peak Found
	FALSE	High	[K].VPDVDIK.[GE]			2	2	5	Q09666; P48552	Q09666 [1354-1360]; [1684-1690]; [2020-2026]; [3122-3128]; P48552 [475-481]	0	785.44	0	6		565	144.9	113.6		180.6	190.9		74.4	13.9	125.3			144.6	32.6	208.3		Shared	Peak Found	Peak Found	High	High	Peak Found	Not Found	Peak Found	High	Not Found	Peak Found	Peak Found	Peak Found	Not Found	Peak Found	High	Peak Found	Peak Found
	FALSE	High	[K].VNVEAPDVNLEGLGGK.[L]			1	1	14	Q09666	Q09666 [664-679]	0	1610.84	0		178	284.3	368.5	114.1	49.9	77.8	92.5	43.7	27.2	32.4	72	135.2	106.5	150.8	10.5	56.5			Not Found	High	High	Peak Found	High	High	Peak Found	Peak Found	Peak Found	Peak Found	Peak Found	High	High	Peak Found	Peak Found	Peak Found	High
	FALSE	High	[K].VQANLGAPDINIEGLDAK.[V]			1	1	10	Q09666	Q09666 [5164-5181]	0	1837.97	0	167		549.7	16.6	181.8	112.8			89.1	3.6	408.7		29.8	121.8	25.4		14.8	78.9		Peak Found	Not Found	Peak Found	High	High	High	Peak Found	Peak Found	High	Peak Found	Peak Found	Not Found	High	Peak Found	Peak Found	Not Found	Peak Found
	FALSE	High	[K].VDTNAPDLSLEGPEGK.[L]			1	1	13	Q09666	Q09666 [1034-1049]	0	1641.8	0		139.8	605	261.2	83.6	7.6	68.9	50.6	22.4	21.3		75.1	105.1	102.1	187.4	3.4	59.6	6.9		Not Found	High	High	High	High	Peak Found	Peak Found	High	High	Peak Found	Not Found	Peak Found	Peak Found	Peak Found	High	Peak Found	Peak Found
	FALSE	High	[K].VDVSAPDVEMQGPDWNLK.[M]			1	1	2	Q09666	Q09666 [980-997]	0	1999.94	0				1389	126						100.8		80.5	90.5	13.2					Not Found	Not Found	Not Found	Peak Found	Peak Found	Not Found	Not Found	Not Found	Not Found	Not Found	Peak Found	Not Found	High	Peak Found	Peak Found	Not Found	Not Found
	FALSE	High	[K].VDVSAPDVEAHGPEWNLK.[M]			1	1	14	Q09666	Q09666 [610-627]	0	1962.96	0				868.6		54.4	120.5	163.8	62.1	38.6		156.5	149.7	64.9	52		39	29.9		Not Found	Not Found	Not Found	High	Not Found	High	Peak Found	High	Peak Found	Peak Found	Not Found	High	High	Peak Found	Peak Found	Not Found	Peak Found
	FALSE	High	[K].VDVEVPDVSLEGPEGK.[L]			1	1	23	Q09666	Q09666 [1290-1305]; [2084-2099]; [2279-2294]	0	1668.83	0		7.6	346	357.3	108.3	33.2	100.3	108.4	29.2	22.8	76.1	97.7	82.7	131.1	166.3	16.4	91.7	24.8		Not Found	Peak Found	Peak Found	High	High	High	High	High	High	High	Peak Found	High	High	High	High	Peak Found	High
	FALSE	High	[K].VDVEGPDVNIEGPEGK.[L]			1	1	20	Q09666	Q09666 [2930-2945]	0	1653.8	1			321.7	317.4	69.6	147.4	101.7	83.4	24.1	42		77.2	59.3	148.5	177.8		88.8	141.1		Not Found	Not Found	High	High	High	High	High	High	Peak Found	High	Not Found	Peak Found	High	High	High	Not Found	High
	FALSE	High	[K].VDVECPDVNIEGPEGK.[W]	1xCarbamidomethyl [C5]		1	1	18	Q09666	Q09666 [2802-2817]	0	1756.81	0		164	241.9	387.2	105.8	29.9	55.4	55.7	19.8	27.7	42.3	70.2	114.2	221.1	115.2		59.9	90		Not Found	High	High	High	Peak Found	High	Peak Found	High	High	Peak Found	Peak Found	High	High	Peak Found	High	Not Found	Peak Found
	FALSE	High	[KN].VDVDVPDVNIEGPDAK.[L]			1	1	21	Q09666	Q09666 [3186-3201]; [3638-3653]; [3968-3983]; [4688-4703]	0	1681.83	0		203.7	305.2	351.4	81.6	30	95.7	105.3	33.1	24.4	98.2	72	80	85.9	113	1.5	77.4	41.7		Not Found	High	High	High	High	Peak Found	Peak Found	High	High	Peak Found	Peak Found	High	High	Peak Found	High	Peak Found	High
	FALSE	High	[K].VDVDIPDVNIEGPDAK.[L]			1	1	5	Q09666	Q09666 [4816-4831]	0	1695.84	0																			No Quan Values	Not Found	High	Peak Found	High	Peak Found	Peak Found	Peak Found	Peak Found	Peak Found	Peak Found	Peak Found	Peak Found	Peak Found	Peak Found	High	Peak Found	Peak Found
	FALSE	High	[K].VDVNAPDVQAPDWHLK.[M]			1	1	8	Q09666	Q09666 [2494-2509]	0	1803.9	0		269.5	21.4	723.9	16.3	38.2	90	87.8	70.5	37.6	11.5	72.9	160.2	34.3	63.1	42.7	15.3	44.8		Not Found	Peak Found	Peak Found	High	Peak Found	High	Peak Found	Peak Found	Peak Found	Peak Found	Peak Found	Peak Found	High	Peak Found	Peak Found	Peak Found	Peak Found
	FALSE	High	[K].VDIKAPDVEGQGLDWSLK.[I]			1	1	1	Q09666	Q09666 [1108-1125]	1	1970.02	0			18.5	138.6	112.3	98.7		24.4	37.9	129.4	229.1	51.6	163.4	346.2	33.3	392.5	24.2			Not Found	Not Found	Peak Found	High	Peak Found	Peak Found	Not Found	Peak Found	Peak Found	Peak Found	Peak Found	Peak Found	Peak Found	Peak Found	Peak Found	Peak Found	Peak Found
	FALSE	High	[R].VDIETPNLEGTLTGPR.[L]			1	1	18	Q09666	Q09666 [541-556]	0	1711.89	0		180.2	125.5	313.7	363.5	11.3	128.3	149.7	44.5	20.5	26.6	83.9	147.3	131.2	4.1	11	58.6			Not Found	High	High	High	High	Peak Found	High	High	Peak Found	Peak Found	Peak Found	High	High	Peak Found	Peak Found	Peak Found	High
	FALSE	High	[K].VDIEGPDVNIEGPEGK.[L]			1	1	26	Q09666	Q09666 [2546-2561]; [2674-2689]	0	1667.81	0	13.2	169.7	302.5	364.4	76.1	33.4	88.2	91.9	23.9	17.4	84.3	68.8	62.4	142.1	156.2		79.6	25.8		Peak Found	High	High	High	High	High	High	High	High	High	High	High	High	High	High	Not Found	High
	FALSE	High	[K].VDIEAPDVSLEGPEGK.[L]			1	1	19	Q09666	Q09666 [1162-1177]	0	1654.82	0	9.6	183.6	348.7	373.8	73.1	27.4	84.2	101	17.5	21.5		66.6	88.5	116.1	165.7		92.5	30		Peak Found	High	High	High	Peak Found	High	Peak Found	High	High	High	Not Found	High	High	Peak Found	Peak Found	Not Found	Peak Found
	FALSE	High	[K].VDIDVPDVNVQGPDWHLK.[M]			1	1	7	Q09666	Q09666 [2876-2893]	0	2046.03	0				732.7	48.8	80.3	135.8	68.6	63.5	18		176.4	148.2	44.9	39.5		214.6	28.8		Not Found	Not Found	Not Found	Peak Found	Peak Found	High	Peak Found	Peak Found	High	Peak Found	Not Found	Peak Found	High	Peak Found	Peak Found	Not Found	Peak Found
	FALSE	High	[K].VDIDVPDVNIEGPEGK.[L]			1	1	24	Q09666	Q09666 [3058-3073]; [3840-3855]	0	1695.84	0																			No Quan Values	Peak Found	Peak Found	High	High	High	High	High	High	High	High	High	High	High	High	High	Peak Found	High
	FALSE	High	[K].VDIDVPDVNIEGPDAK.[L]			1	1	28	Q09666	Q09666 [4224-4239]	0	1695.84	5	9.2	190.2	192.1	354.1	96.3	37.4	112	88	17.3	26.4	113.5	100.5	77.7	134.6	125	14	91.8	19.9		Peak Found	High	High	High	High	High	High	High	High	High	High	High	High	High	High	Peak Found	High
	FALSE	High	[K].VDIDVPDVNLEAPEGK.[L]			1	1	23	Q09666	Q09666 [1546-1561]	0	1709.86	0	18.1	192.1	106.3	244.5	113.3	38.1	133.8	90	13.8	23.5	7.4	172	91.2	135.1	284.3	17.4	119.2			Peak Found	High	High	High	High	High	High	High	High	Peak Found	Peak Found	Peak Found	High	High	High	Peak Found	High
	FALSE	High	[K].VDIDVPDVDVQGPDWHLK.[M]			1	1	12	Q09666	Q09666 [4170-4187]; [4634-4651]	0	2047.01	0		3.3	8	735.1	9.3	68.1	57.4	41.2	54.2	32.9	352.9	75	225.8	70	11.4	3.3	17.2	34.8		Not Found	Peak Found	Peak Found	High	Peak Found	High	Peak Found	Peak Found	High	Peak Found	Peak Found	High	High	Peak Found	Peak Found	Peak Found	Peak Found
	FALSE	High	[K].VDIDTPDINIEGSEGK.[F]			1	1	17	Q09666	Q09666 [3712-3727]	0	1701.82	0	130.8	135.5	150.9	250.7	56.3	22.4	52.2	49.9	127.4	143.9	114.6	55.2	185.4	46.8	120.1	21.8	57.7	78.3		Peak Found	High	High	High	Peak Found	High	High	High	Peak Found	High	Peak Found	Peak Found	Peak Found	Peak Found	Peak Found	Peak Found	High
	FALSE	High	[K].VDIDTPDIDIHGPEGK.[L]			1	1	9	Q09666	Q09666 [4096-4111]	0	1720.84	0			59	712.6	63.5	41.1	88.3	70	43.6	28.4	23.7	83.5	160.4	144.6	161.7		72.8	46.9		Not Found	Not Found	High	High	Peak Found	High	High	Peak Found	High	Peak Found	Peak Found	Peak Found	High	Peak Found	High	Not Found	Peak Found
	FALSE	High	[K].VDIDAPDVSIEGPDAK.[L]			1	1	22	Q09666	Q09666 [4352-4367]	0	1640.8	0			324.3	466.6	59.4	17.4	92.3	118.1	37	21	69.2	64.4	94.7	145	183.5		81.8	25.4		Not Found	High	High	High	Peak Found	High	Peak Found	High	High	High	Peak Found	High	High	Peak Found	High	Not Found	High
	FALSE	High	[K].VDIDAPDVEVHDPDWHLK.[M]			1	1	4	Q09666	Q09666 [1694-1711]	0	2100	0				1307.6			25.9	30.3	69.5	40.1			304.6				22			Not Found	Not Found	Not Found	High	Not Found	Not Found	Peak Found	Peak Found	Peak Found	Peak Found	Not Found	Not Found	High	Not Found	Not Found	Not Found	Peak Found
	FALSE	High	[K].VDIDAPDVDVHGPDWHLK.[M]			1	1	4	Q09666	Q09666 [731-748]; [2225-2242]; [2748-2765]; [4042-4059]; [4298-4315]	0	2027.98	0		15		1201		2.8	15.8	10.1	69.9	42	93.1	24.6	206.7	6.9		112.1				Not Found	Peak Found	Not Found	High	Not Found	Peak Found	Peak Found	Peak Found	Peak Found	Peak Found	Peak Found	Peak Found	Peak Found	Peak Found	Not Found	Peak Found	Not Found
	FALSE	High	[K].VDIKAPEVNLNAPDVDVHGPDWNLK.[M]			1	1	1	Q09666	Q09666 [3449-3473]	1	2755.4	0				840.1									959.9							Not Found	Not Found	Not Found	Peak Found	Not Found	Not Found	Not Found	Not Found	Not Found	Not Found	Not Found	Not Found	High	Not Found	Not Found	Not Found	Not Found
	FALSE	High	[K].VDISAPDVDVHGPDWHLK.[M]			1	1	2	Q09666	Q09666 [1364-1381]	0	1999.99	0			130.5	1133.7			4.8		121.8	30.2			319.8		59.1					Not Found	Not Found	Peak Found	High	Not Found	Not Found	Peak Found	Not Found	Peak Found	Peak Found	Not Found	Not Found	Peak Found	Not Found	Peak Found	Not Found	Not Found
	FALSE	High	[K].VDINTPDVDVHGPDWHLK.[M]			1	1	2	Q09666	Q09666 [4762-4779]	0	2057.01	0				1233.4		43.2					95.6		274.1	120.7				33.1		Not Found	Not Found	Not Found	High	Not Found	Peak Found	Not Found	Not Found	Not Found	Not Found	Peak Found	Not Found	Peak Found	Peak Found	Not Found	Not Found	Not Found
	FALSE	High	[K].VDINAPDVGVQGPDWHLK.[M]			1	1	9	Q09666	Q09666 [2620-2637]	0	1959.99	0		9.4	22.9	972.6		66.5	71.5	74.7	43.5	35.9		66.1	269.1	78.1	28.6		30.9	30.1		Not Found	Peak Found	Peak Found	High	Not Found	Peak Found	High	High	Peak Found	Peak Found	Not Found	Peak Found	High	Peak Found	Peak Found	Not Found	Peak Found
	FALSE	High	[K].VDINAPDVEVQGK.[V]			1	1	8	Q09666	Q09666 [3385-3397]	0	1383.71	0			107.2	158.6	59	16.8	45.1	94.3	78.4	275.1		43.7	75.2	406.9	379.7		56.7	3.4		Not Found	Not Found	High	Peak Found	Peak Found	High	Peak Found	High	Peak Found	Peak Found	Not Found	High	Peak Found	Peak Found	Peak Found	Not Found	High
	FALSE	High	[K].VDINAPDVEVHGPDWHLK.[M]			1	1	4	Q09666	Q09666 [1492-1509]	0	2041.01	0	746.6			660.3		35.2	29.6		8.6	42.8			238.3	38.7						Peak Found	Not Found	Not Found	High	Not Found	High	Peak Found	Not Found	Peak Found	Peak Found	Not Found	Not Found	Peak Found	Peak Found	Not Found	Not Found	Not Found
	FALSE	High	[K].VDINAPDVDVR.[G]			1	1	9	Q09666	Q09666 [3914-3924]	0	1212.62	0	1.7	32.1	66.4	762	34	91.6	19.6	36.2	61.3	9.5	57.5	46.1	169	24.7	277		30.5	80.8		Peak Found	Peak Found	Peak Found	High	Peak Found	High	Peak Found	Peak Found	Peak Found	Peak Found	Peak Found	Peak Found	High	High	High	Not Found	Peak Found
	FALSE	High	[K].VDINAPDVDVQGPDWHLK.[M]			1	1	9	Q09666	Q09666 [3132-3149]; [3786-3803]	0	2018	0	9.5	29.3	26.8	654.3	168.3	49.5	85.3	53.2	63.6	29.8	103	87.4	122	223.5	36.9		32.6	25		Peak Found	Peak Found	Peak Found	High	Peak Found	High	Peak Found	Peak Found	Peak Found	Peak Found	Peak Found	High	High	Peak Found	Peak Found	Not Found	Peak Found
	FALSE	High	[K].VDINAPDVDVHGPDWHLK.[M]			1	1	3	Q09666	Q09666 [3584-3601]	0	2027	0			66.8	626	20.2			8.7		9		42.7	163.5		23.3	9	67.8	762.9		Not Found	Not Found	Peak Found	High	Peak Found	Not Found	Not Found	Peak Found	Not Found	Peak Found	Not Found	Peak Found	High	Not Found	Peak Found	Peak Found	Peak Found
	FALSE	High	[K].VEAPSLDVHMDSPDINIEGPDVK.[I]			1	1	4	Q09666	Q09666 [4949-4971]	0	2477.19	0				1694.9			41.1	45.2					10		8.8					Not Found	Not Found	Not Found	High	Not Found	Not Found	Peak Found	Peak Found	Not Found	Not Found	Not Found	Not Found	Peak Found	Not Found	Peak Found	Not Found	Not Found
	FALSE	High	[K].VGIDTPDIDIHGPEGK.[L]			1	1	12	Q09666	Q09666 [4560-4575]	0	1662.83	0	10.3	27.7	39.7	629.5	34.7	6.4	90.5	89.8	50.4	39.4	36.7	100.2	214	105.6	245.3	20.5	55.1	4.1		Peak Found	Peak Found	Peak Found	High	Peak Found	Peak Found	High	High	Peak Found	High	Peak Found	Peak Found	High	Peak Found	Peak Found	Peak Found	High
	FALSE	High	[K].VGGSGVNVNAK.[G]			1	1	2	Q09666	Q09666 [253-263]	0	1001.54	0																			No Quan Values	Not Found	Not Found	Not Found	Not Found	Not Found	Not Found	Not Found	Not Found	Not Found	Not Found	Not Found	Not Found	Not Found	Not Found	High	Not Found	Not Found
	FALSE	High	[K].VHAPGLNLSGVGGK.[M]			1	1	8	Q09666	Q09666 [5324-5337]	0	1305.73	0	101.9	11.2	269.1	594.5	101.9	41.3	99.8	61	78.4	30.4		91.6	135.3	20.2	98	30.5		34.8		Peak Found	Peak Found	High	High	Peak Found	High	Peak Found	High	Peak Found	Peak Found	Not Found	Peak Found	High	Peak Found	Peak Found	Peak Found	Not Found
	FALSE	High	[K].VGVEVPDVNIEGPEGK.[L]			1	1	19	Q09666	Q09666 [913-928]	0	1637.84	0	231.3	137.9	303.4	274.5	44.8	18.8	71.5	74.5	20.6	18.9	145.3	50.8	63.2	78.4	146.5	14.7	74	30.9		Peak Found	High	High	High	Peak Found	High	Peak Found	High	High	Peak Found	Peak Found	High	High	Peak Found	High	Peak Found	Peak Found
	FALSE	High	[K].VGIQLPEVELSVSTK.[K]			1	1	3	Q09666	Q09666 [5874-5888]	0	1598.9	0				436.3	135		400	201.5		22		90.1	15.2	378	120.7			1.3		Not Found	Not Found	Not Found	High	Peak Found	Not Found	Peak Found	Peak Found	Not Found	Peak Found	Not Found	Peak Found	Peak Found	Peak Found	Peak Found	Not Found	Not Found
	FALSE	High	[K].VESEIKVPDVELK.[S]			1	1	11	Q09666	Q09666 [843-855]	1	1484.82	0	383.6	12.7	51.8	551.1	31.8	11.5	47.7	57.9	36.8	22.9		55.2	201.5	46	222.1		40.3	27		Peak Found	Peak Found	Peak Found	High	Peak Found	High	Peak Found	High	Peak Found	Peak Found	Not Found	High	High	Peak Found	High	Not Found	Peak Found
	FALSE	High	[K].VESDLKGPEVDIEGPEGK.[L]			1	1	10	Q09666	Q09666 [4484-4501]	1	1897.94	0		164.8	172.9	387.6	20.9	15.1	25.2	20.6	4.5	32.5		133	119.3	159.5	304.2	14.5	113.4	112		Not Found	Peak Found	Peak Found	High	Peak Found	High	High	Peak Found	Peak Found	Peak Found	Not Found	Peak Found	High	High	High	Peak Found	Peak Found
	FALSE	High	[K].VEGTLKGPEVDLK.[G]			1	1	2	Q09666	Q09666 [4874-4886]	1	1384.77	0			56.5	427.4		31.3	450.8	188.4	12	3.5		67.8	131.2	118.9	217	53.3	34.5	7.3		Not Found	Not Found	Peak Found	High	Not Found	High	Peak Found	Peak Found	Peak Found	Peak Found	Not Found	Peak Found	Peak Found	Peak Found	Peak Found	Peak Found	Peak Found
	FALSE	High	[K].VEGDLKGPEVDIRDPK.[V]			1	1	1	Q09666	Q09666 [4618-4633]	2	1766.93	0			185	793		37.4		159.9					240.6	61.3	224.6		98.1			Not Found	Not Found	Peak Found	High	Not Found	Peak Found	Not Found	Peak Found	Not Found	Not Found	Not Found	Not Found	Peak Found	Peak Found	Peak Found	Not Found	Peak Found
	FALSE	High	[K].VEGDLKGPEVDIKGPK.[V]			1	1	24	Q09666	Q09666 [2604-2619]; [2732-2747]; [2860-2875]; [3696-3711]; [4154-4169]; [4282-4297]	2	1680.92	0	8.4			482		141.6	22.9	132.3	2.2	53.2		39.3	318.1		590.4			9.6		Peak Found	Not Found	Not Found	High	Not Found	High	Peak Found	High	Peak Found	Peak Found	Not Found	Peak Found	High	Not Found	Peak Found	Not Found	Not Found
	FALSE	High	[K].VEGDLKGPEVDIK.[G]			1	1	46	Q09666	Q09666 [2604-2616]; [2732-2744]; [2860-2872]; [3696-3708]; [4154-4166]; [4282-4294]	1	1398.75	0		110	81.2	638.5	19.7	0.3	100.8	115.1	9	12.7		117.1	191.1	28.1	298.9		77.5			Not Found	High	High	High	High	Peak Found	High	High	Peak Found	Peak Found	Not Found	High	High	High	High	Not Found	High
	FALSE	High	[K].VEGDLKGPEIDIK.[G]			1	1	1	Q09666	Q09666 [4410-4422]	1	1412.76	0				872.1			152.1	138.1				181.2	125		331.4					Not Found	Not Found	Not Found	High	Not Found	Not Found	Peak Found	Peak Found	Not Found	Not Found	Not Found	Peak Found	Peak Found	Not Found	Peak Found	Not Found	Not Found
	FALSE	High	[K].VEGDLKGPEADIKGPK.[V]			1	1	4	Q09666	Q09666 [4746-4761]	2	1652.89	0			18.1	580.3			37.2	117.3		39.7		67	356.1		565.8		18.5			Not Found	Not Found	Peak Found	High	Not Found	Not Found	Peak Found	Peak Found	Not Found	Peak Found	Not Found	Peak Found	High	Not Found	Peak Found	Not Found	Peak Found
	FALSE	High	[K].VEGDLKGPEVDIR.[GD]			1	1	7	Q09666	Q09666 [2988-3000]; [4618-4630]	1	1426.75	0	4.8	41.1	24.4	250.9	267.9	38.4	42.7	119.2	16.1	306.9	2.1	57.3	77	3.5	466.9	31.2	24.9	24.7		Peak Found	Peak Found	Peak Found	High	Peak Found	High	Peak Found	Peak Found	Peak Found	Peak Found	Peak Found	Peak Found	High	Peak Found	Peak Found	Peak Found	Peak Found
	FALSE	High	[R].VTAYTVDVTGR.[E]			1	1	10	Q09666	Q09666 [157-167]	0	1181.62	0	379.2	34.1	435.7	295.6	28	3.5	70.8	44.5	43.7	20.3		55.6	64	74	161.1		68.6	21.3		Peak Found	Peak Found	High	High	High	Peak Found	High	Peak Found	Peak Found	Peak Found	Not Found	High	Peak Found	Peak Found	Peak Found	Not Found	Peak Found
	FALSE	High	[K].VTAPDVDLHLK.[A]			1	1	8	Q09666	Q09666 [4916-4926]	0	1207.67	1		56.2		848.1	114.7	65.4	108.2	130.5	61.4		15.7	99.1	170.7	52.4	56.8	6.9	4.4	9.5		Not Found	High	Not Found	High	Peak Found	High	Peak Found	Peak Found	High	Not Found	Peak Found	Peak Found	High	Peak Found	Peak Found	Peak Found	Peak Found
	FALSE	High	[K].VSAPGVQGDVK.[G]			1	1	12	Q09666	Q09666 [520-530]	0	1056.57	0		236.1	296	101.5	77.2		147.6	178.4	11.8	45.6		107.6		89.5	413.4		38.6	56.8		Not Found	Peak Found	High	High	Peak Found	Not Found	Peak Found	High	Peak Found	High	Not Found	Peak Found	Not Found	High	High	Not Found	Peak Found
	FALSE	High	[R].VSAPEVSVGHK.[G]			1	1	5	Q09666	Q09666 [331-341]	0	1109.59	0	23.2	363.6	376.7	53	81.1		190.6	207.3		55		192.3	23	94.1	27.6	4.6	107.8			Peak Found	High	High	Peak Found	Peak Found	Not Found	High	High	Not Found	Peak Found	Not Found	Peak Found	Peak Found	Peak Found	Peak Found	Peak Found	High
	FALSE	High	[K].VSGPDLDLNLKGPSLK.[G]			1	1	5	Q09666	Q09666 [5297-5312]	1	1652.92	0	433.9	145.7		423.6	33.8	20.5	14.2	88.7	12.5	28.7	89.2	27.8	239	12.1	220.6		9.8			Peak Found	Peak Found	Not Found	High	Peak Found	Peak Found	Peak Found	High	Peak Found	Peak Found	Peak Found	Peak Found	Peak Found	Peak Found	Peak Found	Not Found	Peak Found
	FALSE	High	[K].VSGPDLDLNLK.[G]			1	1	10	Q09666	Q09666 [5297-5307]	0	1170.64	0	15	1060.4	64.9	39		33			337.9		149			49.1	37.8			13.8		Peak Found	High	Peak Found	Peak Found	High	High	High	Peak Found	Peak Found	Peak Found	Peak Found	High	Peak Found	Peak Found	Peak Found	Not Found	Peak Found
	FALSE	High	[K].VQTPEVDVK.[G]			1	1	6	Q09666	Q09666 [3364-3372]	0	1014.55	0			305.8	808.7	80.2		135.8	127						45.8	246			50.7		Not Found	Not Found	Peak Found	High	Peak Found	Not Found	Peak Found	Peak Found	Not Found	Not Found	Not Found	Not Found	Not Found	Peak Found	High	Not Found	Not Found
	FALSE	High	[K].VSVGAPDLSLEASEGSIKLPK.[M]	1xPhospho [S]	Q09666 1xPhospho [S5400]	1	1	4	Q09666	Q09666 [5385-5405]	1	2177.11	0			553.4	32.1	895.8		126.7	33.7				155.1					3.3			Not Found	Not Found	Peak Found	Peak Found	High	Not Found	High	Peak Found	Not Found	Not Found	Not Found	High	Not Found	Not Found	Not Found	Not Found	Peak Found
	FALSE	High	[K].VSVGAPDLSLEASEGSIKLPK.[M]			1	1	5	Q09666	Q09666 [5385-5405]	1	2097.14	0				613		108.4		145					469		464.6					Not Found	Not Found	Not Found	High	Not Found	High	Not Found	Peak Found	Not Found	Not Found	Not Found	Not Found	High	Not Found	Peak Found	Not Found	Not Found
	FALSE	High	[K].VSVGAPDLSLEASEGSIK.[L]	1xPhospho [S]	Q09666 1xPhospho [S]	1	1	6	Q09666	Q09666 [5385-5402]	0	1838.88	0			1116.6		602.4							80.9								Not Found	Not Found	High	Not Found	High	Not Found	Not Found	Not Found	Not Found	Not Found	Not Found	Peak Found	Not Found	Not Found	Not Found	Not Found	Not Found
	FALSE	High	[K].VSVGAPDLSLEASEGSIK.[L]			1	1	12	Q09666	Q09666 [5385-5402]	0	1758.91	0			357.6	424.8	119.6	28.7	134.4	91.2	31	16.3	58	93.7	59.6	158.7	81.7	14.4	72.7	57.8		Not Found	Not Found	Peak Found	High	Peak Found	High	Peak Found	Peak Found	High	Peak Found	Peak Found	High	High	Peak Found	High	Peak Found	Peak Found
	FALSE	High	[K].VSMPDVELNLK.[S]			1	1	4	Q09666	Q09666 [3415-3425]	0	1244.66	0		43.6	16.7	1241.7		29.5	7.3	23.6	75.7	15		29.2	221.7		62.9	16.8		16.2		Not Found	Peak Found	Peak Found	High	Not Found	Peak Found	Peak Found	Peak Found	Peak Found	Peak Found	Not Found	Peak Found	High	Not Found	Peak Found	Peak Found	Not Found
	FALSE	High	[K].VSMPDVDLNLKGPK.[L]			1	1	3	Q09666	Q09666 [1781-1794]	1	1512.81	0				1301.5		42.4		40.4	21.7	22.9		9.2	206.8		64.6			90.5		Not Found	Not Found	Not Found	High	Not Found	Peak Found	Not Found	Peak Found	Peak Found	Peak Found	Not Found	Peak Found	Peak Found	Not Found	Peak Found	Not Found	Not Found
	FALSE	High	[K].VSMPDVDLNLK.[G]			1	1	2	Q09666	Q09666 [1781-1791]	0	1230.64	0				1421.2	32.6	156.8		10.7		15.3			132.3		20.5		10.6			Not Found	Not Found	Not Found	Peak Found	Peak Found	Peak Found	Not Found	Peak Found	Not Found	Peak Found	Not Found	Not Found	High	Not Found	Peak Found	Not Found	Peak Found
	FALSE	High	[K].SSKASLGSLEGEAEAEASSPK.[G]	2xPhospho [S]	Q09666 2xPhospho [S]	1	1	37	Q09666	Q09666 [5745-5765]	1	2194.92	0	37.8		706	3.7	190.1		44.3	32.2		30	29.2	310.4	1.5	396.2		14.2	4.5			Peak Found	Not Found	High	High	High	Not Found	High	High	Not Found	High	Peak Found	High	Peak Found	High	Not Found	Peak Found	Peak Found
	FALSE	High	[K].SSKASLGSLEGEAEAEASSPK.[G]	1xPhospho [S]	Q09666 1xPhospho [S]	1	1	13	Q09666	Q09666 [5745-5765]	1	2114.95	0	3.9		373.4	2.7	115.9		11.4	38.5	2.3	14	88.9	350.6		784.2			14.3			Peak Found	Not Found	High	Peak Found	Peak Found	Not Found	Peak Found	Peak Found	Peak Found	Peak Found	Peak Found	High	Not Found	High	Not Found	Not Found	Peak Found
	FALSE	High	[K].SSGCDVNLPGVNVK.[L]	1xCarbamidomethyl [C4]		1	1	8	Q09666	Q09666 [5499-5512]	0	1445.71	0		175.6		952		45.9	16.2		78.7	119	18		114.3	27.4	165.9	21.2	6.1	59.7		Not Found	High	Not Found	High	Not Found	Peak Found	Peak Found	Not Found	Peak Found	Peak Found	Peak Found	Not Found	High	Peak Found	High	Peak Found	Peak Found
	FALSE	High	[K].SPQISMSDIDLNLKGPK.[I]			1	1	6	Q09666	Q09666 [4516-4532]	1	1842.96	1	13	36.2	43.3	1112.6		15		16.1	304.1	25.3	25.2		118.5	29.6				61.1		Peak Found	Peak Found	Peak Found	High	Not Found	Peak Found	Not Found	Peak Found	Peak Found	Peak Found	Peak Found	Not Found	High	Peak Found	Not Found	Not Found	Not Found
	FALSE	High	[K].SPQISMSDIDLNLK.[G]			1	1	2	Q09666	Q09666 [4516-4529]	0	1560.79	0																			No Quan Values	Not Found	Not Found	Peak Found	Peak Found	Peak Found	Not Found	Not Found	Peak Found	Peak Found	Peak Found	Peak Found	Not Found	High	Peak Found	Peak Found	Peak Found	Not Found
	FALSE	High	[K].SPSLDVTVPEAELNLETPEISVGGK.[G]			1	1	8	Q09666	Q09666 [4993-5017]	0	2581.32	0		41	269.5	202.2	104.7		220	189.8	10.1	14.9		163	37.6	255.6	134.6		118.4	38.6		Not Found	Peak Found	Peak Found	High	Peak Found	Not Found	Peak Found	Peak Found	High	Peak Found	Not Found	Peak Found	High	Peak Found	Peak Found	Not Found	Peak Found
	FALSE	High	[R].SPEPGQTWTR.[E]	1xPhospho [S1]	Q09666 1xPhospho [S93]	1	5	5	Q09666	Q09666 [93-102]	0	1238.52	0			402.3		325.1		165	66.2		37		368.5		266	4.7		165.4			Not Found	Not Found	High	Not Found	High	Not Found	High	Peak Found	Not Found	Peak Found	Not Found	Peak Found	Not Found	High	Peak Found	Not Found	High
	FALSE	High	[R].SPEPGQTWTR.[E]			1	5	1	Q09666	Q09666 [93-102]	0	1158.55	0		238.8	41.4	852	14.6	8.8	240.2	17.2		93.9				45	88.7	37.1	122.4			Not Found	Peak Found	Peak Found	Peak Found	Peak Found	Peak Found	Peak Found	Peak Found	Not Found	High	Not Found	Not Found	Not Found	Peak Found	Peak Found	Peak Found	Peak Found
	FALSE	High	[K].SKGHYEVTGSDDETGKLQGSGVSLASK.[K]	1xPhospho [T/S]	Q09666 1xPhospho [S5841]	1	1	2	Q09666	Q09666 [5832-5858]	2	2817.29	0							459.2	17.2		217.3		849.5		256.8						Not Found	Not Found	Not Found	Not Found	Not Found	Not Found	High	Peak Found	Not Found	Peak Found	Not Found	High	Not Found	Peak Found	Not Found	Not Found	Not Found
	FALSE	High	[K].SKGHYEVTGSDDETGK.[L]	1xPhospho [S10]	Q09666 1xPhospho [S5841]	1	1	2	Q09666	Q09666 [5832-5847]	1	1789.73	0	3.3				213.4		774.6	90.9		142.5		108		467.3						Peak Found	Not Found	Not Found	Not Found	Peak Found	Not Found	Peak Found	Peak Found	Not Found	Peak Found	Not Found	High	Not Found	Peak Found	Not Found	Not Found	Not Found
	FALSE	High	[K].SKGHYEVTGSDDETGK.[L]			1	1	6	Q09666	Q09666 [5832-5847]	1	1709.76	0	265.9	17.3	25.1	531.3	21.1	73.3	51.4	1.8	21.2		692.5		98.7		0.6					Peak Found	Peak Found	Peak Found	High	Peak Found	High	Peak Found	Peak Found	Peak Found	Not Found	Peak Found	Not Found	High	Not Found	Peak Found	Not Found	Not Found
	FALSE	High	[R].SNSFSDEREFSGPSTPTGTLEFEGGEVSLEGGK.[V]	1xPhospho [S/T]	Q09666 1xPhospho [S/T]	1	1	11	Q09666	Q09666 [5780-5812]	1	3514.52	0				2.2	76.3		262.3	32.9		33.3		571.4		821.6						Not Found	Not Found	Not Found	Peak Found	Peak Found	Not Found	High	Peak Found	Not Found	High	Not Found	High	Not Found	Peak Found	Not Found	Not Found	Not Found
	FALSE	High	[R].SNSFSDER.[E]	1xPhospho [S3]	Q09666 1xPhospho [S5782]	1	1	9	Q09666	Q09666 [5780-5787]	0	1021.36	0	29		86.2		438		626.2	23.8		5.7	26.7			564.5						Peak Found	Not Found	High	Not Found	High	Not Found	High	High	Not Found	Peak Found	Peak Found	Not Found	Not Found	High	Not Found	Not Found	Not Found
	FALSE	High	[K].TPSFGISAPQVSIPDVNVNLK.[G]			1	1	11	Q09666	Q09666 [5184-5204]	0	2183.17	0			132.2	302.3	178.9	6.4	231.6	142.9	42.4	13.7		257.7	74.3	173.6	92.1		95.3	56.6		Not Found	Not Found	Peak Found	High	High	Peak Found	Peak Found	High	High	Peak Found	Not Found	Peak Found	High	Peak Found	Peak Found	Not Found	Peak Found
	FALSE	High	[K].TPEMIIQKPK.[I]			1	1	3	Q09666	Q09666 [490-499]	0	1184.67	0				1059.7		112.9				19.3					78.7			529.4		Not Found	Not Found	Not Found	High	Not Found	Peak Found	Not Found	Not Found	Not Found	Peak Found	Not Found	Not Found	Not Found	Not Found	Peak Found	Not Found	Not Found
	FALSE	High	[K].TVIRLPSGSGAASPTGSAVDIR.[A]	1xPhospho [S]	Q09666 1xPhospho [S]	1	1	7	Q09666	Q09666 [204-225]	1	2192.11	0		28.6	464.5	48.6	85.6	3.6		49.6	91			532.8	18.9		48.7	37.9	54.8	335.5		Not Found	Peak Found	High	Peak Found	Peak Found	Peak Found	Not Found	Peak Found	Peak Found	Not Found	Not Found	High	Peak Found	Not Found	Peak Found	Peak Found	Peak Found
	FALSE	High	[K].TVIRLPSGSGAASPTGSAVDIR.[A]	2xPhospho [S/T]	Q09666 2xPhospho [S216; S]	1	1	4	Q09666	Q09666 [204-225]	1	2272.07	0		363	561.9		217.2				77.2			143.2				423	14.5			Not Found	Peak Found	High	Not Found	Peak Found	Not Found	Not Found	Not Found	Peak Found	Not Found	Not Found	Peak Found	Not Found	Not Found	Not Found	High	Peak Found
	FALSE	High	[R].EGAKDIDISSPEFK.[I]			1	1	2	Q09666	Q09666 [168-181]	1	1535.76	0		910		112.9		451.4	7.2	19.4	90.7	122.5			22.6		63.4					Not Found	Peak Found	Not Found	High	Not Found	Peak Found	Peak Found	Peak Found	Peak Found	Peak Found	Not Found	Not Found	Peak Found	Not Found	Peak Found	Not Found	Not Found
	FALSE	High	[K].EGDQIVGATIYFDNLQSGEVTQLLNTMGHHTVGLK.[L-]			1	6	6	Q09666	Q09666 [51-85]	0	3785.88	0	692.9	219		450.4	48.5		132.9		9.3				88.2	149.4				9.5		Peak Found	Peak Found	Not Found	High	Peak Found	Not Found	Peak Found	Not Found	Peak Found	Not Found	Not Found	Not Found	High	Peak Found	Not Found	Not Found	Not Found
	FALSE	High	[R].EFSGPSTPTGTLEFEGGEVSLEGGK.[V]	1xPhospho [T/S]	Q09666 1xPhospho [S/T]	1	1	6	Q09666	Q09666 [5788-5812]	0	2592.14	0					497.9							404.7		897.4						Not Found	Not Found	Not Found	Not Found	Peak Found	Not Found	Not Found	Not Found	Not Found	Not Found	Not Found	Peak Found	Not Found	High	Not Found	Not Found	Not Found
	FALSE	High	[R].EFSGPSTPTGTLEFEGGEVSLEGGK.[V]			1	1	2	Q09666	Q09666 [5788-5812]	0	2512.17	0			223.4	118.3	178.5		176.5	139.4				228.9		499.3	53.4		182.2			Not Found	Not Found	Peak Found	High	Peak Found	Not Found	Peak Found	Peak Found	Not Found	Not Found	Not Found	Peak Found	Not Found	Peak Found	Peak Found	Not Found	Peak Found
	FALSE	High	[K].FAGGLHFSGPK.[V]			1	1	6	Q09666	Q09666 [5613-5623]	0	1117.58	0		33	8.1	784.6	18	110	91.4	108.5	116.5	120.6	62.5		241.5	33.9	64.5	7				Not Found	Peak Found	Peak Found	High	Peak Found	High	Peak Found	Peak Found	High	Peak Found	Peak Found	Not Found	High	Peak Found	Peak Found	Peak Found	Peak Found
	FALSE	High	[PR].EVDVNLPK.[A]			1	1	1	Q09666	Q09666 [768-775]; [896-903]; [1145-1152]; [1273-1280]; [1731-1738]; [2067-2074]; [2262-2269]; [2529-2536]; [2913-2920]; [3169-3176]; [3951-3958]; [4079-4086]	0	913.499	0		5.7	514.2	567.5			31.4	61.6	43.7	13.6		27.8	44.7	41.9	330.3	77.7	39.8			Not Found	Peak Found	Peak Found	High	Not Found	Not Found	Peak Found	Peak Found	Peak Found	Peak Found	Not Found	Peak Found	Peak Found	Peak Found	Peak Found	Peak Found	Peak Found
	FALSE	High	[K].FKAEAPLPSPK.[L]	1xPhospho [S9]	Q09666 1xPhospho [S5110]	1	1	10	Q09666	Q09666 [5102-5112]	1	1264.63	0			955.6	21.3	321.8		74.9	30	8.8	68.8		201.6	6.8	79.2	11	17.5	2.8			Not Found	Not Found	High	High	High	Not Found	High	Peak Found	Peak Found	High	Not Found	High	Peak Found	High	Peak Found	Peak Found	Peak Found
	FALSE	High	[K].FKAEAPLPSPK.[L]			1	1	12	Q09666	Q09666 [5102-5112]	1	1184.67	0	4.3	86.7	186.8	640.1	33.8	14.3	83.9	93.5	68	31.5		100.1	59	64.7	94.4		22.1	216.7		Peak Found	High	High	High	Peak Found	Peak Found	High	High	Peak Found	Peak Found	Not Found	Peak Found	High	High	High	Not Found	Peak Found
	FALSE	High	[K].FKMPFLSISSPK.[V]			1	1	1	Q09666	Q09666 [3403-3414]	1	1381.75	0				1260.2		251.3		50.9		54.5			183.1							Not Found	Not Found	Not Found	High	Not Found	Peak Found	Not Found	Peak Found	Not Found	Peak Found	Not Found	Not Found	Peak Found	Not Found	Not Found	Not Found	Not Found
	FALSE	High	[K].FKMPEMSIKPQK.[I]			1	1	1	Q09666	Q09666 [1439-1450]	1	1463.77	0				1068.7					231.5	97.4			402.4							Not Found	Not Found	Not Found	High	Not Found	Not Found	Not Found	Not Found	Peak Found	Peak Found	Not Found	Not Found	Peak Found	Not Found	Not Found	Not Found	Not Found
	FALSE	High	[K].FGTFGGLGSK.[S]			1	1	3	Q09666	Q09666 [5822-5831]	0	970.499	0				1240.4			11.5	2.8		44.1		34.6	203.2	20.1	168.8	64.6	10			Not Found	Not Found	Not Found	Peak Found	Not Found	Not Found	Peak Found	Peak Found	Not Found	Peak Found	Not Found	Peak Found	High	Peak Found	High	Peak Found	Peak Found
	FALSE	High	[K].FGTFGGLGSK.[S]	1xPhospho [S9]	Q09666 1xPhospho [S5830]	1	1	2	Q09666	Q09666 [5822-5831]	0	1050.47	0			906.8		777.2		46.8	21.9	3.1	1.2		27.8		11.8	3.3					Not Found	Not Found	Peak Found	Not Found	High	Not Found	Peak Found	Peak Found	Peak Found	Peak Found	Not Found	Peak Found	Not Found	Peak Found	Peak Found	Not Found	Not Found
	FALSE	High	[R].EMGVDVHFPK.[A]			1	1	2	Q09666	Q09666 [5677-5686]	0	1158.56	0				1357.4					181.3	99.3		3	157.6	1.3						Not Found	Not Found	Not Found	High	Not Found	Not Found	Not Found	Not Found	Peak Found	Peak Found	Not Found	Peak Found	Peak Found	Peak Found	Not Found	Not Found	Not Found
	FALSE	High	[R].ELLLPNWQGSGSHGLTIAQR.[D]			1	6	6	Q09666	Q09666 [9-28]	0	2177.15	0				1160			72.4	79.8	56.9	40.5		101.9	159.9	100.3			28.2			Not Found	Not Found	Not Found	High	Not Found	Not Found	Peak Found	Peak Found	Peak Found	Peak Found	Not Found	Peak Found	High	Peak Found	Not Found	Not Found	Peak Found
	FALSE	High	[K].AKGEVDVDVPKLEGDLK.[G]			1	1	2	Q09666	Q09666 [2400-2416]	2	1811.97	0				1231.3		9.3	74.5	46.5		19.7		56.5	141.3		141.3		79.4			Not Found	Not Found	Not Found	High	Not Found	Peak Found	Peak Found	Peak Found	Not Found	Peak Found	Not Found	Peak Found	Peak Found	Not Found	Peak Found	Not Found	Peak Found
	FALSE	High	[K].AKGEVDVDVPK.[L]			1	1	4	Q09666	Q09666 [2400-2410]	1	1156.62	0			260.5	648.8	75.1		127.5	79.2	70	32		103.6	191.1	150.9	61.5					Not Found	Not Found	Peak Found	High	Peak Found	Not Found	Peak Found	Peak Found	Peak Found	Peak Found	Not Found	Peak Found	High	Peak Found	Peak Found	Not Found	Not Found
	FALSE	High	[K].APNISMPDVDLNLKGPK.[I]			1	1	2	Q09666	Q09666 [2450-2466]	1	1808.96	0				1498.8		5.7							238		57.5					Not Found	Not Found	Not Found	High	Not Found	Peak Found	Not Found	Not Found	Not Found	Not Found	Not Found	Not Found	High	Not Found	Peak Found	Not Found	Not Found
	FALSE	High	[K].APNISMPDVDLNLK.[G]			1	1	4	Q09666	Q09666 [2450-2463]	0	1526.79	0				1505.9		67.6		16.5	62.1				129.2				18.7			Not Found	Not Found	Not Found	High	Not Found	Peak Found	Not Found	Peak Found	Peak Found	Not Found	Not Found	Not Found	High	Not Found	Not Found	Not Found	Peak Found
	FALSE	High	[K].APSLDIKGPEVDVSGPK.[L]			1	1	4	Q09666	Q09666 [3324-3340]	1	1708.91	0	6.6	211.3		358.6	11	60.4	57.7	96.8	7.2	119.2	11.3		189		661.8			9.3		Peak Found	Peak Found	Not Found	High	Peak Found	Peak Found	Peak Found	Peak Found	Peak Found	Peak Found	Peak Found	Not Found	High	Not Found	Peak Found	Not Found	Not Found
	FALSE	High	[K].ANVDISAPK.[V]			1	1	9	Q09666	Q09666 [1025-1033]	0	914.494	0		289.3	464.7	26.3	110.3		164.4	210.4		67		149.3		194.6	123.8					Not Found	Peak Found	High	Peak Found	Peak Found	Not Found	High	High	Not Found	High	Not Found	High	Not Found	High	Peak Found	Not Found	Not Found
	FALSE	High	[K].APEVNLNAPDVDVHGPDWNLK.[M]			1	1	6	Q09666	Q09666 [3453-3473]	0	2300.13	0	53.2	30.7	172.5	866.8		64.9	6		49.5		170.3	69.6	218			14.3	61.6	22.6		Peak Found	Peak Found	Peak Found	High	Not Found	High	Peak Found	Not Found	Peak Found	Not Found	Peak Found	Peak Found	High	Not Found	Not Found	Peak Found	Peak Found
	FALSE	High	[K].APDVEGQGLDWSLK.[I]			1	1	6	Q09666	Q09666 [1112-1125]	0	1514.75	0																			No Quan Values	Not Found	Not Found	Not Found	High	Peak Found	Not Found	Peak Found	High	Not Found	Not Found	Not Found	Peak Found	High	Peak Found	Peak Found	Peak Found	Peak Found
	FALSE	High	[K].APDVDVNIAGPDAALK.[V]			1	1	5	Q09666	Q09666 [5057-5072]	0	1565.82	0	16.1	197	288.4	223.2	29	7.9		36.4	24.5	6.3	348.2	59.4	8.4	26		438	82.5	8.9		Peak Found	Peak Found	High	High	Peak Found	Peak Found	Not Found	Peak Found	Peak Found	Peak Found	Peak Found	High	Peak Found	Peak Found	Not Found	Peak Found	Peak Found
	FALSE	High	[K].ADVDVSGPK.[MV]			1	1	2	Q09666	Q09666 [1409-1417]; [2270-2278]; [2921-2929]	0	887.447	0				1171.9											534.9			93.3		Not Found	Not Found	Not Found	High	Not Found	Not Found	Not Found	Not Found	Not Found	Not Found	Not Found	Not Found	Not Found	Not Found	Peak Found	Not Found	Not Found
	FALSE	High	[K].ADVDISGPK.[IV]			1	1	7	Q09666	Q09666 [776-784]; [904-912]; [2537-2545]	0	901.463	0																			No Quan Values	Not Found	Peak Found	Peak Found	Peak Found	Peak Found	High	High	Peak Found	Not Found	Peak Found	Peak Found	Peak Found	High	High	Peak Found	Not Found	Peak Found
	FALSE	High	[K].AEASIQAGAGDGEWEESEVK.[L]			1	1	3	Q09666	Q09666 [5687-5706]	0	2062.92	0			57.3	96.7			377.1	103.8		61.6		651.9		34.6	142.6		274.4			Not Found	Not Found	Peak Found	High	Not Found	Not Found	Peak Found	Peak Found	Not Found	Peak Found	Not Found	Peak Found	Not Found	Peak Found	Peak Found	Not Found	Peak Found
	FALSE	High	[K].AEAPLPSPK.[L]	1xPhospho [S7]	Q09666 1xPhospho [S5110]	1	1	4	Q09666	Q09666 [5104-5112]	0	989.47	0			909.7	28.2	405		28	9.1		37.6	202.1	27.7		37.5	3.5	74.2		37.4		Not Found	Not Found	High	Peak Found	High	Not Found	Peak Found	Peak Found	Not Found	Peak Found	Peak Found	Peak Found	Not Found	Peak Found	Peak Found	Peak Found	Not Found
	FALSE	High	[K].ADIKSPSLDVTVPEAELNLETPEISVGGK.[G]			1	1	1	Q09666	Q09666 [4989-5017]	1	3008.57	0								538.6				1020.6			240.8					Not Found	Not Found	Not Found	Not Found	Not Found	Not Found	Not Found	Peak Found	Not Found	Not Found	Not Found	Peak Found	Not Found	Not Found	High	Not Found	Not Found
	FALSE	High	[K].ADLGVSGPK.[V]			1	1	2	Q09666	Q09666 [1537-1545]	0	843.457	0							611.9	438.2						749.8						Not Found	Not Found	Not Found	Not Found	Not Found	Not Found	Peak Found	High	Not Found	Not Found	Not Found	Not Found	Not Found	Peak Found	Not Found	Not Found	Not Found
	FALSE	High	[K].ADIEISGPK.[V]			1	1	4	Q09666	Q09666 [4343-4351]	0	929.494	0	116.1			991.4			55.6			15.7	31.7		16.7		504.2			68.5		Peak Found	Not Found	Not Found	High	Not Found	Not Found	Peak Found	Not Found	Not Found	Peak Found	Peak Found	Not Found	Peak Found	Not Found	High	Not Found	Not Found
	FALSE	High	[K].ADIDVSGPSVDTDAPDLDIEGPEGK.[L]			1	1	14	Q09666	Q09666 [1739-1763]	0	2512.16	0	6.4	2.9	295.5	61.3	88.1		85.4	84.4		6.4	627.2	83	5.1	197.6	150.7	4.3	99.4	2.4		Peak Found	Peak Found	High	High	High	Not Found	High	High	Not Found	Peak Found	Peak Found	High	Peak Found	High	High	Peak Found	Peak Found
	FALSE	High	[K].ADIDVSGPKVDVECPDVNIEGPEGK.[W]	1xCarbamidomethyl [C14]		1	1	4	Q09666	Q09666 [2793-2817]	1	2639.25	0				68.3			94		609.5	19.9	154.1	24.9	113.1		436.8	84.9	182.2	12.4		Not Found	Not Found	Not Found	High	Not Found	Not Found	Peak Found	Not Found	Peak Found	Peak Found	Peak Found	Peak Found	High	Not Found	High	Peak Found	Peak Found
	FALSE	High	[K].ADIDVSGPKVDVDVPDVNIEGPDAK.[L]			1	1	12	Q09666	Q09666 [3177-3201]; [3959-3983]; [4679-4703]	1	2564.27	0				71.8	1543.9	16.2		120.7	25.6					11.5				10.4		Not Found	Not Found	Not Found	High	Peak Found	Peak Found	Not Found	High	Peak Found	Not Found	Not Found	Not Found	High	Peak Found	High	Not Found	Not Found
	FALSE	High	[K].ADIDVSGPKVDVDIPDVNIEGPDAK.[L]			1	1	2	Q09666	Q09666 [4807-4831]	1	2578.29	0																			No Quan Values	Peak Found	Not Found	Not Found	Peak Found	Not Found	Not Found	Peak Found	Peak Found	Not Found	Peak Found	Peak Found	Peak Found	High	Peak Found	High	Not Found	Peak Found
	FALSE	High	[K].ADIDVSGPKVDIEGPDVNIEGPEGK.[L]			1	1	1	Q09666	Q09666 [2665-2689]	1	2550.26	0		105.3					783.5				226.6				684.6					Not Found	Peak Found	Not Found	Not Found	Not Found	Not Found	Peak Found	Not Found	Not Found	Not Found	Peak Found	Not Found	Not Found	Not Found	High	Not Found	Not Found
	FALSE	High	[K].ADLDVSGPKVDIDVPDVNIEGPEGK.[L]			1	1	5	Q09666	Q09666 [3049-3073]; [3831-3855]	1	2578.29	0							495.9								513.5		790.5			Peak Found	Not Found	Not Found	Peak Found	Not Found	Not Found	Peak Found	Peak Found	Not Found	Peak Found	Peak Found	Peak Found	High	Peak Found	High	Not Found	Peak Found
	FALSE	High	[K].ADLDVSGPKVDIDVPDVNIEGPDAK.[L]			1	1	3	Q09666	Q09666 [4215-4239]	1	2578.29	1	10			193.3			30.9	177.3		23.5	449.1	67.8	172.5	33.8	606.7		16.5	18.5		Peak Found	Not Found	Not Found	Peak Found	Not Found	Not Found	Peak Found	Peak Found	Not Found	Peak Found	Peak Found	Peak Found	High	Peak Found	High	Not Found	Peak Found
	FALSE	High	[K].ADIDVSGPK.[V]			1	1	40	Q09666	Q09666 [1281-1289]; [2665-2673]; [2793-2801]; [3049-3057]; [3177-3185]; [3831-3839]; [3959-3967]; [4087-4095]; [4215-4223]; [4679-4687]; [4807-4815]	0	901.463	3		203.5	394	62.3	122.9	9.4	194.8	214.7		39.2	51.6	149.9	14.3	164.5	6.8		171.3	0.5		Not Found	Peak Found	High	High	High	High	High	High	Not Found	High	High	High	High	Peak Found	High	Not Found	High
	FALSE	High	[K].ADIDISGPNVDVDVPDVNIEGPDAK.[L]			1	1	6	Q09666	Q09666 [3629-3653]	0	2564.24	0			48.7	127.6	243.8		290.2	326.6		12.6	141.7	171.9			292.6		144.4			Not Found	Not Found	Peak Found	High	Peak Found	Not Found	High	Peak Found	Not Found	High	Peak Found	Peak Found	Not Found	Not Found	High	Not Found	Peak Found
	FALSE	High	[R].AGAISASGPELQGAGHSK.[L]			1	1	13	Q09666	Q09666 [226-243]	0	1637.82	0	6.6	129.9	157.2	720.3	37.8	29.3	61.4	107.4			3.2	90.7	86.8	64.7	267.5		37.1			Peak Found	High	High	High	Peak Found	High	High	High	Not Found	Not Found	Peak Found	Peak Found	High	Peak Found	High	Not Found	Peak Found
	FALSE	High	[K].AGLRVSAPEVSVGHK.[G]	1xPhospho [S6]	Q09666 1xPhospho [S332]	1	1	1	Q09666	Q09666 [327-341]	1	1586.81	0			530.4	47.9	163.7		75.9		6.3	45.7		765.4		78.7	5.7		80.3			Not Found	Not Found	Peak Found	Peak Found	Peak Found	Not Found	Peak Found	Not Found	Peak Found	Peak Found	Not Found	High	Not Found	Peak Found	Peak Found	Not Found	Peak Found
	FALSE	High	[K].AEGPEVDVNLPK.[A]			1	1	22	Q09666	Q09666 [764-775]; [892-903]; [1727-1738]; [2063-2074]; [2525-2536]; [2909-2920]	0	1267.65	0	7.6	7	273.4	699.3	38.2	54.9	24.8	20.4	52.7	13	10	38.3	141.7	67.7	273.9	0.9	21.1	55		High	High	High	High	High	High	High	High	Peak Found	Peak Found	Peak Found	High	High	Peak Found	High	Peak Found	High
	FALSE	High	[K].AEGPDVAVDLPK.[G]			1	1	4	Q09666	Q09666 [3489-3500]	0	1210.63	0	1.4	127.7	258	476.1	60.6	7.6	63.9	47.7	53.1	42.5	15.3	44.1	141.6	45.9	233.2	137.1	41.8	2.4		Peak Found	High	High	Peak Found	Peak Found	Peak Found	Peak Found	High	Peak Found	Peak Found	Peak Found	Peak Found	Peak Found	Peak Found	Peak Found	Peak Found	Peak Found
	FALSE	High	[R].DDGVFVQEVTQNSPAAR.[T]			1	6	26	Q09666	Q09666 [29-45]	0	1832.88	0	11	181.6	253.1	136.5	67	4.5	61.1	61.4	7.3	27.3	112.2	101.4	20.3	491.4	119.9	33.9	96.8	13.3		Peak Found	High	High	High	High	Peak Found	High	High	Peak Found	High	Peak Found	High	High	High	High	High	High
	FALSE	High	[K].DIDISSPEFK.[I]			1	1	7	Q09666	Q09666 [172-181]	0	1150.56	0			133.5	620.7	81	6.3	43		6.3	27.9	139.3		110.6	201.4	421.8			8.3		Not Found	Not Found	Peak Found	High	Peak Found	Peak Found	High	Not Found	Peak Found	Peak Found	High	Not Found	High	High	Peak Found	Not Found	Not Found
	FALSE	High	[R].AVEVQGPSLESGDHGK.[I]			1	1	17	Q09666	Q09666 [288-303]	0	1609.78	0	7.3	93.7	665.9	46.9	29	171.4	78.5	96.9	0.8	4.1	18.4	131.8	45.7	33.2	109	5.3	69.3	192.8		Peak Found	High	High	High	Peak Found	High	High	High	Peak Found	Peak Found	Peak Found	High	High	Peak Found	Peak Found	Peak Found	High
	FALSE	High	[K].ASLGSLEGEAEAEASSPKGK.[F]	2xPhospho [S5; S15]	Q09666 2xPhospho [S5752; S5762]	1	1	1	Q09666	Q09666 [5748-5767]	1	2077.87	0			869		652.4		44.4	17								217.3				Not Found	Not Found	Peak Found	Not Found	High	Not Found	Peak Found	Peak Found	Not Found	Not Found	Not Found	Not Found	Not Found	Not Found	Not Found	Peak Found	Not Found
	FALSE	High	[K].ASLGSLEGEAEAEASSPK.[G]	2xPhospho [S]	Q09666 2xPhospho [S]	1	1	16	Q09666	Q09666 [5748-5765]	0	1892.76	0	27.2	3.7	785.2	0.9	505.1		10.9	6.2		5.8	18	28.1		329.2		79.8				Peak Found	Peak Found	High	Peak Found	High	Not Found	Peak Found	High	Not Found	Peak Found	Peak Found	Peak Found	Not Found	High	Not Found	Peak Found	Not Found
	FALSE	High	[K].ASLGSLEGEAEAEASSPK.[G]	1xPhospho [S]	Q09666 1xPhospho [S]	1	1	35	Q09666	Q09666 [5748-5765]	0	1812.79	0	44	22.2	353.2	2.6	382.3		57.8	11		24	186.1	40.8	0.2	622.2	0.9	25.9	24.1	2.8		High	Peak Found	High	High	High	Not Found	High	High	Not Found	High	Peak Found	High	Peak Found	High	Peak Found	Peak Found	Peak Found
	FALSE	High	[K].ASLGSLEGEAEAEASSPK.[G]			1	1	10	Q09666	Q09666 [5748-5765]	0	1732.82	0	19.1	338.9	191.8	375.7	95.2		94.8	73.9				26.4	76.3	106.7	327.4		73.8			Peak Found	High	High	High	Peak Found	Not Found	High	Peak Found	Not Found	Not Found	Not Found	Peak Found	High	Peak Found	High	Not Found	Peak Found
	FALSE	High	[K].LDADMPEVAVEGPNGK.[W]			1	1	2	Q09666	Q09666 [2353-2368]	0	1641.78	0																			No Quan Values	Not Found	Peak Found	Not Found	High	Not Found	Peak Found	Not Found	Not Found	Not Found	Not Found	Not Found	Not Found	Not Found	Not Found	Not Found	Not Found	Not Found
	FALSE	High	[K].IDVDAPDIDIHGPDAK.[L]			1	1	5	Q09666	Q09666 [3260-3275]	0	1690.83	0	70.7	71.4	228.5	5.9	116.7	194	304.6	28.5	108.8	2	12.3	192.4	4.1	142		10.1		307.8		Peak Found	Peak Found	High	Peak Found	Peak Found	High	High	Peak Found	Peak Found	Peak Found	Peak Found	High	Peak Found	Peak Found	Not Found	Peak Found	Not Found
	FALSE	High	[K].IDVTAPDVSIEEPEGK.[L]			1	1	16	Q09666	Q09666 [785-800]	0	1698.84	1	9.4	194.9	340.9	362.4	55.1		71.2	108.5	25	20.4	54.1	56.1	95.8	119.8	198.5		85.7	2.3		Peak Found	High	High	High	Peak Found	Not Found	High	Peak Found	High	Peak Found	Peak Found	High	High	Peak Found	High	Not Found	High
	FALSE	High	[K].IEGEMQVPDVDIR.[G]	1xOxidation [M5]		1	1	4	Q09666	Q09666 [1092-1104]	0	1516.73	0																			No Quan Values	Peak Found	Not Found	High	High	Peak Found	Not Found	High	Peak Found	Peak Found	Not Found	Not Found	Peak Found	Not Found	Peak Found	Peak Found	Not Found	Not Found
	FALSE	High	[K].IEGEMQVPDVDIR.[G]			1	1	2	Q09666	Q09666 [1092-1104]	0	1500.74	0				1393.8		5.5		38.6	39.9	12.7			224.6		57.3		27.6			Not Found	Not Found	Not Found	High	Not Found	Peak Found	Not Found	Peak Found	Peak Found	Peak Found	Not Found	Not Found	Peak Found	Not Found	Peak Found	Not Found	Peak Found
	FALSE	High	[K].LEGELQAPDLELSLPAIHVEGLDIK.[A]			1	1	30	Q09666	Q09666 [5113-5137]	0	2699.45	0	12.1	136.4	149.7	162.7	111.9	42.1	171.5	178.6	23.2	9	25.2	93.7	156.3	267.4	124.9	83.3	44.4	7.4		Peak Found	High	Peak Found	High	Peak Found	High	High	High	Peak Found	High	Peak Found	High	High	High	High	Peak Found	Peak Found
	FALSE	High	[K].LEGELKGPK.[V]			1	1	1	Q09666	Q09666 [722-730]	1	970.557	0	636.9			113.1									69.3		980.7					Peak Found	Not Found	Not Found	Peak Found	Not Found	Not Found	Not Found	Not Found	Not Found	Not Found	Not Found	Not Found	Peak Found	Not Found	High	Not Found	Not Found
	FALSE	High	[K].LEGELKGPELDVK.[G]			1	1	2	Q09666	Q09666 [2337-2349]	1	1426.78	0			775.7	79.5				286.3	44.6			47.8		263.6	232.4		42.7	27.5		Not Found	Not Found	High	Peak Found	Not Found	Not Found	Not Found	Peak Found	Peak Found	Not Found	Not Found	Peak Found	Not Found	Peak Found	Peak Found	Not Found	Peak Found
	FALSE	High	[K].LEGDLTGPSVGVEVPDVELECPDAK.[L]	1xCarbamidomethyl [C21]		1	1	14	Q09666	Q09666 [1880-1904]; [1947-1971]	0	2625.26	0	19.2	196.1	208.9	156.9	197.6		98.6	123.7	8.3	15.6	88.6	176.7	11.6	232.4	123	5.2	137.7			Peak Found	Peak Found	Peak Found	High	Peak Found	Not Found	Peak Found	Peak Found	High	Peak Found	Peak Found	High	High	High	High	Peak Found	Peak Found
	FALSE	High	[K].LEGDLTGPSVDVEVPDVELECPDAK.[L]	1xCarbamidomethyl [C21]		1	1	7	Q09666	Q09666 [2142-2166]	0	2683.27	0			66	190	108.1		150.6	276.4				298.3		317.3	213.7		179.8			Not Found	Not Found	Peak Found	High	Peak Found	Not Found	High	High	Not Found	Not Found	Not Found	Peak Found	Not Found	Peak Found	High	Not Found	Peak Found
	FALSE	High	[R].LDFEGPDAK.[L]			1	1	11	Q09666	Q09666 [4890-4898]	0	991.473	0	3	2.9	215.8	691.7	37.4	5.4	64.8	82.5	75	36.6		45.8	93.8	59.1	305.2	3.2	24.9	52.9		Peak Found	Peak Found	Peak Found	High	Peak Found	Peak Found	High	High	High	Peak Found	Not Found	High	High	Peak Found	High	Peak Found	Peak Found
	FALSE	High	[K].KPDIDITGPK.[V]			1	1	2	Q09666	Q09666 [3375-3384]	0	1083.6	0				343.6			209	276.9				427.6					542.9			Not Found	Not Found	Not Found	High	Not Found	Not Found	Peak Found	Peak Found	Not Found	Not Found	Not Found	Peak Found	Not Found	Not Found	Not Found	Not Found	Peak Found
	FALSE	High	[K].KQGFDLNVPGGEIDASLKAPDVDVNIAGPDAALK.[V]			1	1	2	Q09666	Q09666 [5039-5072]	2	3434.78	0				1705.1														94.9		Not Found	Not Found	Not Found	High	Not Found	Not Found	Not Found	Not Found	Not Found	Not Found	Not Found	Not Found	Not Found	Not Found	Not Found	Not Found	Not Found
	FALSE	High	[K].LEGGEVDLK.[G]			1	1	7	Q09666	Q09666 [4937-4945]	0	959.504	0			310.6	786.4	58.2		121.1	85.3	20.1	24.1			29.9	76.5	196.7		40.2	50.8		Not Found	Not Found	High	High	Peak Found	Not Found	Peak Found	Peak Found	Peak Found	Peak Found	Not Found	Not Found	High	High	High	Not Found	Peak Found
	FALSE	High	[K].LEGGEVDLKGPK.[V]			1	1	6	Q09666	Q09666 [4937-4948]	1	1241.67	0		90.4	96.9	326.9	63.6	41	66	204.9	17	27.8	63	70.1	101.6	14.2	570.1		37.8	8.6		Not Found	Peak Found	Peak Found	High	Peak Found	High	Peak Found	Peak Found	Peak Found	Peak Found	Peak Found	Peak Found	High	Peak Found	High	Not Found	Peak Found
	FALSE	High	[R].LKSEDGVEGDLGETQSR.[T]	1xPhospho [S3]	Q09666 1xPhospho [S135]	1	1	43	Q09666	Q09666 [133-149]	1	1899.83	0	55.9	60.3	551.7	15	196.6	0.4	74.1	36.4	5	39.9	301.6	67.4	2	215.1	8.5	84.6	82.4	3.2		High	High	High	High	High	Peak Found	High	High	Peak Found	High	High	High	High	High	Peak Found	High	Peak Found
	FALSE	High	[R].LKSEDGVEGDLGETQSR.[T]			1	1	5	Q09666	Q09666 [133-149]	1	1819.87	0		244.2	334.8	46.5	107.3				31.8		92			315.9	471.5		155.9			Not Found	Peak Found	Peak Found	Peak Found	Peak Found	Not Found	Not Found	Not Found	Peak Found	Not Found	Peak Found	Not Found	High	High	High	Not Found	Peak Found
	FALSE	High	[K].LKGPQITGPSLEGDLGLK.[G]			1	1	12	Q09666	Q09666 [370-387]	1	1823.03	0	177.9		101.8	167.9		364.8		73.6			160		13.4		30.3	239.4	33.8	437.1		Peak Found	Not Found	Peak Found	High	Not Found	High	High	High	Not Found	High	Peak Found	High	High	High	Peak Found	Peak Found	Peak Found
	FALSE	High	[K].IKGGADVSGGVSAPDISLGEGHLSVK.[G]			1	1	1	Q09666	Q09666 [5566-5591]	1	2450.29	0				273.9		105.4						51.7		1199.7				169.3		Not Found	Not Found	Not Found	High	Not Found	Peak Found	Not Found	Not Found	Not Found	Not Found	Not Found	Peak Found	Not Found	Peak Found	Not Found	Not Found	Not Found
	FALSE	High	[K].LKGEIDASVPELEGDLRGPQVDVK.[G]			1	1	5	Q09666	Q09666 [1795-1818]	2	2564.36	0					1291.1	28.8		34.6	34.2				81.1		19.8	302		8.6		Not Found	Not Found	Not Found	High	Peak Found	Peak Found	Not Found	Peak Found	Peak Found	Not Found	Not Found	Not Found	High	Not Found	Peak Found	Peak Found	Not Found
	FALSE	High	[K].LKGEIDASVPELEGDLR.[G]			1	1	2	Q09666	Q09666 [1795-1811]	1	1840.97	0		29	244.5	848.5			99.7	52.1	81.5					252			115.2	77.6		Not Found	Peak Found	Peak Found	High	Not Found	Not Found	Peak Found	Peak Found	Peak Found	Not Found	Not Found	Not Found	Not Found	High	Not Found	Not Found	Peak Found
	FALSE	High	[K].IKGDVPSVGLEGPDVDLQGPEAK.[I]			1	1	14	Q09666	Q09666 [5208-5230]	1	2320.2	0		122.2	213.3	499	89.2	27.1	121.1	116.4	27.3	24.7	38.8	135.4	46.8	139.8	113.2	6.3	79.3			Not Found	High	High	High	Peak Found	Peak Found	High	High	Peak Found	High	Peak Found	Peak Found	High	High	High	Peak Found	Peak Found
	FALSE	High	[K].IKGDVDVTGPK.[V]			1	1	13	Q09666	Q09666 [2849-2859]	1	1128.63	1		33.2	34.1	418.3	17.7	79.4	91	12.8	28.9	10.8	60.7	702.8	190.5	74.3	31			14.6		Not Found	High	Peak Found	High	Peak Found	High	High	High	Peak Found	Peak Found	Peak Found	Peak Found	High	High	Peak Found	Not Found	Peak Found
	FALSE	High	[K].IKGDVDVSVPEVEGK.[L]			1	1	6	Q09666	Q09666 [2467-2481]	1	1570.83	0				755			183.9	147.4	44.8	40.5		38.7	148	37.4	260.3		42.2	101.9		Not Found	Not Found	Not Found	High	Not Found	Not Found	High	Peak Found	Peak Found	Peak Found	Not Found	Peak Found	High	Peak Found	Peak Found	Not Found	Peak Found
	FALSE	High	[K].LKGDVDVSLPEVEGEMKVPDVDIK.[G]			1	1	2	Q09666	Q09666 [1337-1360]	2	2611.35	0				1618.1				40.5					141.4							Not Found	Not Found	Not Found	High	Not Found	Not Found	Not Found	Peak Found	Not Found	Not Found	Not Found	Not Found	Peak Found	Not Found	Not Found	Not Found	Not Found
	FALSE	High	[K].LKGDVDVSGPK.[L]			1	1	3	Q09666	Q09666 [3307-3317]	1	1114.61	0		0.7		1091.1			180.7	23.1		8.3		63	329.4	6.7	1.1		95.9			Not Found	Peak Found	Not Found	Peak Found	Not Found	Not Found	Peak Found	Peak Found	Not Found	Peak Found	Not Found	Peak Found	High	Peak Found	Peak Found	Not Found	Peak Found
	FALSE	High	[K].IKGDVDVSAPK.[L]			1	1	7	Q09666	Q09666 [2326-2336]	1	1128.63	1		162.9	349.4	430.7	110.6		109.3	139.4	17.8	93.4			319.5				66.9			Not Found	High	High	Peak Found	Peak Found	Not Found	Peak Found	High	Peak Found	Peak Found	Peak Found	Peak Found	Peak Found	Peak Found	Peak Found	Not Found	Peak Found
	FALSE	High	[K].IKGDMDISVPK.[L]			1	1	2	Q09666	Q09666 [4533-4543]	1	1202.64	0	132.5	258.4		1140.6		43.2							109.3				22.9	93.1		Peak Found	Peak Found	Not Found	High	Not Found	Peak Found	Not Found	Not Found	Not Found	Not Found	Not Found	Not Found	Peak Found	Not Found	Not Found	Not Found	Peak Found
	FALSE	High	[K].IKFPTMK.[V]			1	1	1	Q09666	Q09666 [304-310]	1	864.501	0			29.3	1653.3	28.3										89.1					Not Found	Not Found	Peak Found	High	Peak Found	Not Found	Not Found	Not Found	Not Found	Not Found	Not Found	Not Found	Not Found	Not Found	Peak Found	Not Found	Not Found
	FALSE	High	[K].LEGPDVSLKGPGVDLPSVNLSMPK.[V]	1xOxidation [M22]		1	1	1	Q09666	Q09666 [5273-5296]	1	2465.3	0				69		453	173.2	227	385.5	18.2		63.7	68.1		124.8		40.8	176.8		Not Found	Not Found	Not Found	Peak Found	Not Found	Peak Found	Peak Found	High	Peak Found	Peak Found	Not Found	Peak Found	Peak Found	Not Found	Peak Found	Not Found	Peak Found
	FALSE	High	[K].LEGPDVSLKGPGVDLPSVNLSMPK.[V]			1	1	4	Q09666	Q09666 [5273-5296]	1	2449.3	0				1196.5		44.8							349.7		68.3	140.6				Not Found	Not Found	Not Found	High	Not Found	Peak Found	Not Found	Not Found	Not Found	Not Found	Not Found	Not Found	High	Not Found	Peak Found	Peak Found	Not Found
	FALSE	High	[K].LEGPDVSLK.[G]			1	1	2	Q09666	Q09666 [5273-5281]	0	957.525	0	36.5	219.7	6.8	661.3	196.2	0.8	113.1	56.9	99.6	29.7		66.3	71.5	110.7	76.2		54.6			Peak Found	High	Peak Found	Peak Found	Peak Found	Peak Found	High	Peak Found	Peak Found	Peak Found	Not Found	Peak Found	Peak Found	Peak Found	Peak Found	Not Found	Peak Found
	FALSE	High	[K].LEVPDMNIR.[G]	1xOxidation [M6]		1	1	3	Q09666	Q09666 [2482-2490]	0	1102.56	0	107.2	105.1					531.5	493.5	76.7			351.4			134.5					Peak Found	Peak Found	Not Found	Not Found	Not Found	Not Found	High	High	Peak Found	Not Found	Not Found	High	Not Found	Not Found	Peak Found	Not Found	Not Found
	FALSE	High	[K].LEVPDMNIR.[G]			1	1	4	Q09666	Q09666 [2482-2490]	0	1086.56	0				1501.1					106.8	14.1			136		42.1					Not Found	Not Found	Not Found	High	Not Found	Not Found	Not Found	Not Found	Peak Found	Peak Found	Not Found	Not Found	High	Not Found	Peak Found	Not Found	Not Found
	FALSE	High	[K].IGFSGPK.[L]			1	1	3	Q09666	Q09666 [4930-4936]	0	705.393	0			320.7		118.7		124.6	135.4		25.8	351.6	134.7				497.6	91			Not Found	Not Found	Peak Found	Not Found	Peak Found	Not Found	High	High	Not Found	Peak Found	Peak Found	High	Not Found	Not Found	Not Found	Peak Found	Peak Found
	FALSE	High	[K].GGADVSGGVSAPDISLGEGHLSVK.[G]	1xPhospho [S22]	Q09666 1xPhospho [S5589]	1	1	2	Q09666	Q09666 [5568-5591]	0	2289.08	0																			No Quan Values	Not Found	Not Found	Not Found	Not Found	Not Found	Not Found	Not Found	Not Found	Not Found	Not Found	Not Found	Not Found	Not Found	Not Found	High	Not Found	Not Found
	FALSE	High	[K].GGADVSGGVSAPDISLGEGHLSVK.[G]			1	1	2	Q09666	Q09666 [5568-5591]	0	2209.11	0				666			108.1	154	137.3	29.5		60.6	150.3	120.3	302.3		71.6			Not Found	Not Found	Not Found	High	Not Found	Not Found	Peak Found	Peak Found	Peak Found	Peak Found	Not Found	Peak Found	Peak Found	Peak Found	Peak Found	Not Found	Peak Found
	FALSE	High	[K].GGVTGSPEASISGSK.[G]			1	1	9	Q09666	Q09666 [5726-5740]	0	1333.66	0		212.9	127.9	480.1	41.4		105.2	76.8		16.1	20.8	272.6	20.9	117.8	186.3		121.2			Not Found	High	High	High	Peak Found	Not Found	High	Peak Found	Not Found	Peak Found	Peak Found	Peak Found	Peak Found	Peak Found	Peak Found	Not Found	High
	FALSE	High	[R].GGVQVPAVDISSSLGGR.[A]			1	1	10	Q09666	Q09666 [271-287]	0	1598.85	0			171.3	726.3	112.2	61	62.7	54.2	60.2	13.7	8.8	35.4	194.4	100.5	103.1		46.9	49.5		Not Found	Not Found	High	High	Peak Found	High	Peak Found	High	High	Peak Found	Peak Found	Peak Found	High	Peak Found	Peak Found	Not Found	Peak Found
	FALSE	High	[K].GGVDVTLPR.[V]			1	1	5	Q09666	Q09666 [585-593]	0	913.51	0		145.5		758.7	110.4		72	91.5	61.2	59.2			166.1		252.4		82.9			Not Found	Peak Found	Not Found	High	Peak Found	Not Found	Peak Found	Peak Found	Peak Found	Peak Found	Not Found	Not Found	High	Not Found	High	Not Found	Peak Found
	FALSE	High	[K].GGVTGSPEASISGSK.[G]	1xPhospho [S6]	Q09666 1xPhospho [S5731]	1	1	23	Q09666	Q09666 [5726-5740]	0	1413.63	0	106.7	83.3	366.5	9.2	475.6	6.7	80.3	39.1	3.2	53.4	233	66.3	1.7	193.1	1.8	31.6	42.4	6		High	High	High	High	High	Peak Found	High	High	Peak Found	High	Peak Found	Peak Found	Peak Found	High	Peak Found	High	High
	FALSE	High	[K].GGVTGSPEASISGSKGDLK.[S]	1xPhospho [S14]	Q09666 1xPhospho [S5739]	1	1	5	Q09666	Q09666 [5726-5744]	1	1826.85	0			763.4	38.4	113.7	28.7	74	6.8		36		299.8		360				79		Not Found	Not Found	High	Peak Found	Peak Found	Peak Found	Peak Found	Peak Found	Not Found	Peak Found	Not Found	High	Not Found	Peak Found	Not Found	Not Found	Not Found
	FALSE	High	[K].GGVTGSPEASISGSKGDLK.[S]	2xPhospho [S/T]	Q09666 2xPhospho [S5731; S]	1	1	2	Q09666	Q09666 [5726-5744]	1	1906.82	0	281.3		964.5		224.2		123.6	14.8		117.4		47.6			26.6					Peak Found	Not Found	High	Not Found	Peak Found	Not Found	Peak Found	Peak Found	Not Found	Peak Found	Not Found	Peak Found	Not Found	Not Found	Peak Found	Not Found	Not Found
	FALSE	High	[K].GGVTGSPEASISGSKGDLKSSK.[A]	1xPhospho [S]	Q09666 1xPhospho [S]	1	1	2	Q09666	Q09666 [5726-5747]	2	2129.01	0																			No Quan Values	Not Found	Not Found	Not Found	Not Found	Not Found	Not Found	Not Found	Not Found	Not Found	Not Found	Not Found	Not Found	Not Found	Not Found	Not Found	Not Found	Not Found
	FALSE	High	[K].GGKPGLTIQAPQLEVSVPSANIEGLEGK.[L]			1	1	16	Q09666	Q09666 [342-369]	0	2789.5	0				453.2	151.8	23.7	203.5	177.7	52.5	25.8		75.3	111.4	241.3	207.5		76.2			Not Found	Not Found	Not Found	High	Peak Found	High	High	High	High	Peak Found	Not Found	Peak Found	High	High	High	Not Found	Peak Found
	FALSE	High	[K].GGQIGLQAPGLSVSGPQGHLESGSGK.[V]			1	1	9	Q09666	Q09666 [5630-5655]	0	2418.24	0		59.5		795.5	35.8	56.6	108.3	103.1	54.2	39.1		79.9	150.3	53.8	174.6		89.2			Not Found	Peak Found	Not Found	High	Peak Found	High	Peak Found	Peak Found	High	Peak Found	Not Found	Peak Found	High	Peak Found	Peak Found	Not Found	Peak Found
	FALSE	High	[K].GEGPDVDVNLPK.[A]			1	1	11	Q09666	Q09666 [2781-2792]; [3037-3048]; [3819-3830]; [4203-4214]; [4667-4678]	0	1239.62	0		180.9	68.9	769	65.5	60	37.8	9.5	144.5	47	3.3	15.1	125.4	18.2	161.9	17	71.2	4.9		Not Found	High	High	Peak Found	High	High	High	Peak Found	Peak Found	Peak Found	Peak Found	Peak Found	High	Peak Found	High	Peak Found	Peak Found
	FALSE	High	[K].GEGPDVDVSLPK.[A]			1	1	2	Q09666	Q09666 [4795-4806]	0	1212.61	0				1224.2			62.3	24.1	109.7				150.7		183.9		45.2			Not Found	Not Found	Not Found	High	Not Found	Not Found	Peak Found	Peak Found	Peak Found	Not Found	Not Found	Not Found	Peak Found	Not Found	Peak Found	Not Found	Peak Found
	FALSE	High	[K].GEGPDVDVTLPK.[A]			1	1	1	Q09666	Q09666 [4331-4342]	0	1226.63	0																			Not Reliable	Not Found	Not Found	Not Found	Not Found	Not Found	Not Found	Not Found	Not Found	High	Not Found	Not Found	Not Found	Not Found	Not Found	Not Found	Not Found	Not Found
	FALSE	High	[K].GEGPDVHMTLPK.[G]			1	1	2	Q09666	Q09666 [643-654]	0	1280.63	0		254.2		1215.6					25	5.9			35.6	62	21.2			180.6		Not Found	Peak Found	Not Found	High	Not Found	Not Found	Not Found	Not Found	Peak Found	Peak Found	Not Found	Not Found	Peak Found	Peak Found	Peak Found	Not Found	Not Found
	FALSE	High	[K].GEIDASVPELEGDLR.[G]			1	1	2	Q09666	Q09666 [1797-1811]	0	1599.79	0																			No Quan Values	Peak Found	Peak Found	Peak Found	High	Not Found	Not Found	Not Found	Not Found	Not Found	Not Found	Peak Found	Peak Found	Peak Found	Peak Found	Peak Found	Peak Found	Peak Found
	FALSE	High	[K].GEGPEVDVTLPK.[A]			1	1	3	Q09666	Q09666 [3617-3628]	0	1240.64	0			160	821.8	47.7	22.1	87.9	49.9	82.4	7.7	25.6	58.4	111.6	52.9	189	26.3	53.2	3.5		Not Found	Not Found	Peak Found	Peak Found	Peak Found	Peak Found	High	Peak Found	High	Peak Found	Peak Found	Peak Found	High	Peak Found	Peak Found	Peak Found	Peak Found
	FALSE	High	[K].GEGPEVDVNLPK.[A]			1	1	10	Q09666	Q09666 [1141-1152]; [2258-2269]; [3165-3176]; [3947-3958]; [4075-4086]	0	1253.64	0		205	189.3	726.9	30.5	58.8	22	9.8	72.4	6.9		21.1	86.8	47	206.9		14.8	101.8		Not Found	High	Peak Found	Peak Found	High	High	Peak Found	Peak Found	High	Peak Found	Not Found	Peak Found	Peak Found	High	Peak Found	Not Found	Peak Found
	FALSE	High	[K].GEGPEVDMNLPK.[A]			1	1	2	Q09666	Q09666 [1525-1536]	0	1285.61	1		6.5		415.1		9.8			22.1			1290.2	35.4		11.4			9.5		Not Found	Peak Found	Not Found	High	Not Found	Peak Found	Not Found	Not Found	Peak Found	Not Found	Not Found	Peak Found	Peak Found	Not Found	Peak Found	Not Found	Not Found
	FALSE	High	[K].GEGPEFDVNLSK.[A]			1	1	8	Q09666	Q09666 [1013-1024]	0	1291.62	1		147.1	203.1	548.2	100.7		100.5	42.9	60.7	4.6	18.8	79.1	103.2	101.7	159.5		67.9	62		Not Found	High	High	High	Peak Found	Not Found	Peak Found	Peak Found	Peak Found	Peak Found	Peak Found	Peak Found	High	High	Peak Found	Not Found	Peak Found
	FALSE	High	[K].GDVPSVGLEGPDVDLQGPEAK.[I]			1	1	2	Q09666	Q09666 [5210-5230]	0	2079.02	0			200.1	476.3				637.8		18.1			123.1		293.1			51.5		Not Found	Not Found	Peak Found	High	Not Found	Not Found	Not Found	Peak Found	Not Found	Peak Found	Not Found	Not Found	Peak Found	Not Found	Peak Found	Not Found	Not Found
	FALSE	High	[K].GDVDVTLPK.[V]			1	1	1	Q09666	Q09666 [4737-4745]	0	943.509	0				120.3	638.2			69.1		141.7			2.2	728.7	77.6			22.1		Not Found	Not Found	Not Found	High	Peak Found	Not Found	Not Found	Peak Found	Not Found	Peak Found	Not Found	Not Found	Peak Found	Peak Found	Peak Found	Not Found	Not Found
	FALSE	High	[K].GDVDVSVPK.[VL]			1	1	1	Q09666	Q09666 [1211-1219]; [1938-1946]	0	915.478	0			677.7	563.9	242		89.1	45.5							90.4		91.5			Not Found	Not Found	Peak Found	High	Peak Found	Not Found	Peak Found	Peak Found	Not Found	Not Found	Not Found	Not Found	Not Found	Not Found	Peak Found	Not Found	Peak Found
	FALSE	High	[K].GDVDVSLPK.[LVM]			1	1	2	Q09666	Q09666 [2133-2141]; [2595-2603]; [2723-2731]; [3761-3769]; [4017-4025]; [4145-4153]; [4273-4281]; [4401-4409]; [4475-4483]	0	929.494	0	126.1	969.1		292.7	11.3	4.8	27.8	34.6	64.6	1.3	3.2		107.1		128.9	3.4	25.1			Peak Found	Peak Found	Not Found	High	Peak Found	Peak Found	Peak Found	Peak Found	Peak Found	Peak Found	Peak Found	Not Found	High	Not Found	Peak Found	Peak Found	Peak Found
	FALSE	High	[K].GDVDVSLPEVEGEMK.[V]			1	1	2	Q09666	Q09666 [1339-1353]	0	1603.75	0				786			291.2	180.7	131.1			132.4		278.6						Not Found	Not Found	Not Found	High	Not Found	Not Found	Peak Found	Peak Found	Peak Found	Not Found	Not Found	Peak Found	Not Found	Peak Found	Not Found	Not Found	Not Found
	FALSE	High	[K].GEVDVSLANVEGDLK.[G]			1	1	2	Q09666	Q09666 [3235-3249]	0	1544.78	0				225.1			107.1		78.8			23.1	87.9	71.7	99.5	1074.2	32.6			Not Found	Not Found	Not Found	High	Not Found	Not Found	Peak Found	Not Found	Peak Found	Not Found	Not Found	Peak Found	Peak Found	Peak Found	Peak Found	Peak Found	Peak Found
	FALSE	High	[K].GEVDVDVPKLEGDLK.[G]			1	1	2	Q09666	Q09666 [2402-2416]	1	1612.84	0				272.8			316.3					167.6			60		892.4	90.9		Not Found	Not Found	Not Found	High	Not Found	Not Found	Peak Found	Not Found	Not Found	Not Found	Not Found	Peak Found	Not Found	Not Found	Peak Found	Not Found	Peak Found
	FALSE	High	[K].GHYEVTGSDDETGKLQGSGVSLASK.[K]	1xPhospho [S/T]	Q09666 1xPhospho [S/T]	1	1	19	Q09666	Q09666 [5834-5858]	1	2602.17	0			101.4				329	51.3		108.5		514		650.7	2.6		42.5			Not Found	Not Found	Peak Found	Not Found	Not Found	Not Found	High	High	Not Found	High	Not Found	High	Not Found	High	Peak Found	Not Found	Peak Found
	FALSE	High	[K].GHYEVTGSDDETGKLQGSGVSLASK.[K]			1	1	2	Q09666	Q09666 [5834-5858]	1	2522.2	0				147.5				22.2		19.3				116.3	110.7	1384				Not Found	Not Found	Not Found	High	Not Found	Not Found	Not Found	Peak Found	Not Found	Peak Found	Not Found	Not Found	Not Found	Peak Found	Peak Found	Peak Found	Not Found
	FALSE	High	[K].GHYEVTGSDDETGK.[L]	1xPhospho [S/T]	Q09666 1xPhospho [S/T]	1	1	20	Q09666	Q09666 [5834-5847]	0	1574.6	0	128.4		304.9	19.8	273.4		309.7	32.6		83.6	23.3			543.5			32.1	48.7		High	Not Found	High	High	High	Not Found	Peak Found	High	Not Found	High	Peak Found	High	Not Found	High	Not Found	Not Found	High
	FALSE	High	[K].GHYEVTGSDDETGK.[L]			1	1	8	Q09666	Q09666 [5834-5847]	0	1494.63	0	81.7	25.1		810.3	86.1	11	121.5		60.3	32.8			162.1	271.4	26.1		111.6			Peak Found	Peak Found	Not Found	High	Peak Found	Peak Found	High	Not Found	High	Peak Found	Not Found	Not Found	Peak Found	Peak Found	Peak Found	Not Found	Peak Found
	FALSE	High	[K].GKKPDIDITGPK.[V]			1	1	1	Q09666	Q09666 [3373-3384]	1	1268.72	0							489.7	434.4		48.5		483.6		159.1		184.8				Not Found	Not Found	Not Found	Not Found	Not Found	Not Found	Peak Found	High	Not Found	Peak Found	Not Found	Peak Found	Not Found	Peak Found	Not Found	Peak Found	Not Found
	FALSE	High	[K].GKGGVTGSPEASISGSKGDLK.[S]	1xPhospho [S16]	Q09666 1xPhospho [S5739]	1	1	1	Q09666	Q09666 [5724-5744]	2	2011.97	0																			No Quan Values	Not Found	Not Found	High	Not Found	Not Found	Not Found	Not Found	Not Found	Not Found	Not Found	Not Found	Not Found	Not Found	Not Found	Not Found	Not Found	Not Found
	FALSE	High	[K].GKGGVTGSPEASISGSK.[G]	1xPhospho [S/T]	Q09666 1xPhospho [S/T]	1	1	17	Q09666	Q09666 [5724-5740]	1	1598.74	0	34.2	7	410.6	21.6	449.1	2.5	112.4	75	1.4	56.4	39.5	318.8		200.1	4.9		65	1.5		High	Peak Found	High	High	High	Peak Found	Peak Found	Peak Found	Peak Found	High	Peak Found	Peak Found	Not Found	High	Peak Found	Not Found	Peak Found
	FALSE	High	[K].GKGGVTGSPEASISGSK.[G]			1	1	2	Q09666	Q09666 [5724-5740]	1	1518.78	0																			No Quan Values	Not Found	Peak Found	Peak Found	High	Not Found	Peak Found	Not Found	Peak Found	Not Found	Peak Found	Peak Found	Not Found	Peak Found	Not Found	Not Found	Not Found	Not Found
	FALSE	High	[K].FSMPSLKGEGPEVDVNLPK.[A]	1xOxidation [M3]		1	1	1	Q09666	Q09666 [1134-1152]	1	2060.04	0		224.4	161	130.2	127	86.2	33	510.3				34.5				156.4	140.8	196.2		Not Found	Peak Found	Peak Found	Peak Found	Peak Found	Peak Found	Peak Found	High	Not Found	Not Found	Not Found	Peak Found	Not Found	Not Found	Not Found	Peak Found	Peak Found
	FALSE	High	[K].FSMPSLKGEGPEVDVNLPK.[A]			1	1	2	Q09666	Q09666 [1134-1152]	1	2044.04	0				1349.6		62							259.1		129.3					Not Found	Not Found	Not Found	High	Not Found	Peak Found	Not Found	Not Found	Not Found	Not Found	Not Found	Not Found	High	Not Found	Peak Found	Not Found	Not Found
	FALSE	High	[K].FSVSGLK.[A]			1	1	5	Q09666	Q09666 [3482-3488]	0	737.419	0	37.1			672.5	279.7		198.8	145		65.3		142.5		51.2	90.6		52.2	65		Peak Found	Not Found	Not Found	Peak Found	Peak Found	Not Found	Peak Found	High	Not Found	High	Not Found	High	Not Found	Peak Found	High	Not Found	Peak Found
	FALSE	High	[K].FSVPGFK.[A]			1	1	3	Q09666	Q09666 [757-763]	0	781.424	0			187.3	743.8	24.7	52	53.7	98.2	94.7	41.1		66.4	310.7	27.4	64.4		1.3	34.4		Not Found	Not Found	Peak Found	High	Peak Found	High	Peak Found	Peak Found	High	Peak Found	Not Found	Peak Found	Peak Found	Peak Found	Peak Found	Not Found	Peak Found
	FALSE	High	[K].FSMPSLKGEGPEFDVNLSK.[A]			1	1	1	Q09666	Q09666 [1006-1024]	1	2082.02	0				1654.5					34.3						111.2					Not Found	Not Found	Not Found	High	Not Found	Not Found	Not Found	Not Found	Peak Found	Not Found	Not Found	Not Found	Not Found	Not Found	Peak Found	Not Found	Not Found
	FALSE	High	[K].FSMPGFKGEGR.[E]			1	1	2	Q09666	Q09666 [1262-1272]	1	1212.58	0				1355.3									444.7							Not Found	Not Found	Not Found	High	Not Found	Not Found	Not Found	Not Found	Not Found	Not Found	Not Found	Not Found	High	Not Found	Not Found	Not Found	Not Found
	FALSE	High	[K].FSMPGFKGEGPEVDVK.[L]			1	1	3	Q09666	Q09666 [1390-1405]	1	1723.84	0				1067.2		112.5	9.9		37	18		14.6	230.2		279.8	21.6		9.3		Not Found	Not Found	Not Found	High	Not Found	Peak Found	Peak Found	Not Found	Peak Found	Peak Found	Not Found	Peak Found	Peak Found	Not Found	Peak Found	Peak Found	Not Found
	FALSE	High	[K].FSMPGFKGEGPEVDMNLPK.[A]			1	1	4	Q09666	Q09666 [1518-1536]	1	2079.99	0				1637.3								9.9	152.8							Not Found	Not Found	Not Found	High	Not Found	Not Found	Not Found	Not Found	Not Found	Not Found	Not Found	Peak Found	High	Not Found	Not Found	Not Found	Not Found
	FALSE	High	[K].FSMPGFKGEGPDVDVTLPK.[A]			1	1	2	Q09666	Q09666 [4324-4342]	1	2021	0	13.6			933		5.2	41.4		83.4	6.1	193.4	120.4	182.7	90.6	52.1	78.1				Peak Found	Not Found	Not Found	High	Not Found	Peak Found	Peak Found	Not Found	Peak Found	Peak Found	Peak Found	Peak Found	High	Peak Found	Peak Found	Peak Found	Not Found
	FALSE	High	[K].FSMPGFKGEGPDVDVSLPK.[A]			1	1	1	Q09666	Q09666 [4788-4806]	1	2006.99	0				1429	12.4					20			278		60.5					Not Found	Not Found	Not Found	High	Peak Found	Not Found	Not Found	Not Found	Not Found	Peak Found	Not Found	Not Found	Peak Found	Not Found	Peak Found	Not Found	Not Found
	FALSE	High	[K].FSMPGFKGEGPDVDVNLPK.[A]	1xOxidation [M3]		1	1	1	Q09666	Q09666 [3030-3048]; [3812-3830]; [4196-4214]; [4660-4678]	1	2049.99	0			228.4	322.3				927.9					19.7		148.8		152.9			Not Found	Not Found	Peak Found	Peak Found	Not Found	Not Found	Not Found	High	Not Found	Not Found	Not Found	Not Found	Peak Found	Not Found	Peak Found	Not Found	Peak Found
	FALSE	High	[K].FSMPGFKGEGPDVDVNLPK.[A]			1	1	7	Q09666	Q09666 [3030-3048]; [3812-3830]; [4196-4214]; [4660-4678]	1	2034	0	4.4			1199.7		24.1	4.9	7.6		18.3	319.3	1.9	127.3		78.9		8	5.5		Peak Found	Not Found	Not Found	High	Not Found	High	Peak Found	Peak Found	Not Found	Peak Found	Peak Found	Peak Found	High	Not Found	Peak Found	Not Found	Peak Found
	FALSE	High	[K].FSMPGFK.[AG]	1xOxidation [M3]		1	1	11	Q09666	Q09666 [885-891]; [1262-1268]; [1390-1396]; [1518-1524]; [1720-1726]; [2056-2062]; [2251-2257]; [2518-2524]; [2646-2652]; [2902-2908]; [3030-3036]; [3610-3616]; [3812-3818]; [4068-4074]; [4196-4202]; [4324-4330]; [4660-4666]; [4788-4794]	0	829.391	0	1.5	123.5	461.5	41.1	17.1	3.1	388.4	379.2		6.3	2.7	251.5		79.2	24.1	4	16.9			Peak Found	High	High	High	Peak Found	Peak Found	High	High	Not Found	Peak Found	Peak Found	High	Not Found	Peak Found	Peak Found	Peak Found	Peak Found
	FALSE	High	[K].FSMPGFK.[AG]			1	1	5	Q09666	Q09666 [885-891]; [1262-1268]; [1390-1396]; [1518-1524]; [1720-1726]; [2056-2062]; [2251-2257]; [2518-2524]; [2646-2652]; [2902-2908]; [3030-3036]; [3610-3616]; [3812-3818]; [4068-4074]; [4196-4202]; [4324-4330]; [4660-4666]; [4788-4794]	0	813.396	0			5.1	1489.4	3.4	40.8	2	4.9	0.3	18.2		2.6	215.9		15.2	0.5	1.3	0.3		Not Found	Not Found	Peak Found	High	Peak Found	High	Peak Found	Peak Found	Peak Found	High	Not Found	Peak Found	High	Not Found	High	Peak Found	Peak Found
	FALSE	High	[K].FSMPGFKGEGPEVDVNLPK.[A]			1	1	4	Q09666	Q09666 [2251-2269]; [4068-4086]	1	2048.02	0		28.3	47.9	559.8	10.3			36.1			847.1	37.5	126.3		22.6	44.9	39.2			Not Found	Peak Found	Peak Found	High	Peak Found	Not Found	Not Found	Peak Found	Not Found	Not Found	Peak Found	Peak Found	High	Not Found	Peak Found	Peak Found	Peak Found
	FALSE	High	[K].FNFSKPK.[G]			1	1	1	Q09666	Q09666 [5717-5723]	0	867.472	0	190.3	385.6	444.5	5	93.2		175.2	158.2	7		65.5			166				109.5		Peak Found	Peak Found	High	Peak Found	Peak Found	Not Found	Peak Found	Peak Found	Peak Found	Not Found	Peak Found	Not Found	Not Found	Peak Found	Not Found	Not Found	Not Found
	FALSE	High	[K].GAKPQGHIGVDASAPQIGGSITGPSVEVQAPDIDVQGPGSK.[L]			1	1	3	Q09666	Q09666 [388-428]	0	3921.99	0				272.7			80.2	209.6				156.5	35.6	982.2	16.2		47			Not Found	Not Found	Not Found	High	Not Found	Not Found	Peak Found	High	Not Found	Not Found	Not Found	Peak Found	Peak Found	Peak Found	Peak Found	Not Found	Peak Found
	FALSE	High	[K].GDLDIAGPNLEGDFK.[G]			1	1	2	Q09666	Q09666 [3431-3445]	0	1560.75	0	158.1	273.6	60.9	363.6	84.1		116.4	57.8	158.8	49.1		82	89.5	111.1	92.9		76.2	26		Peak Found	Peak Found	Peak Found	High	Peak Found	Not Found	Peak Found	Peak Found	Peak Found	Peak Found	Not Found	Peak Found	Peak Found	Peak Found	Peak Found	Not Found	Peak Found
	FALSE	High	[K].GDFDVSVPK.[V]			1	1	1	Q09666	Q09666 [4865-4873]	0	963.478	0				942.6	286.6		80.7		108				134		194.9		53.2			Not Found	Not Found	Not Found	High	Peak Found	Not Found	Peak Found	Not Found	Peak Found	Not Found	Not Found	Not Found	Peak Found	Not Found	Peak Found	Not Found	Peak Found
	FALSE	High	[K].GDRSPEPGQTWTR.[E]	1xPhospho [S4]	Q09666 1xPhospho [S93]	1	5	1	Q09666	Q09666 [90-102]	1	1566.67	0	68.9	92.6	27.4	69.3	115.3		65	44.1	15.5	66.6	138.4	223.5	52	200.5	17.4	42.1	561.3			Peak Found	Peak Found	Peak Found	Peak Found	Peak Found	Not Found	Peak Found	Peak Found	Peak Found	Peak Found	Peak Found	Peak Found	Peak Found	Peak Found	Peak Found	Peak Found	High
	FALSE	High	[K].GDMDVSLPK.[V]			1	1	1	Q09666	Q09666 [3107-3115]; [3889-3897]	0	961.466	0	24.3			1499.7		56.7							219.3							Peak Found	Not Found	Not Found	High	Not Found	Peak Found	Not Found	Not Found	Not Found	Not Found	Not Found	Not Found	Peak Found	Not Found	Not Found	Not Found	Not Found
	FALSE	High	[K].GDMDISVPK.[L]			1	1	1	Q09666	Q09666 [4535-4543]	0	961.466	0		632.2	362.6	633.4		46	56.5		24.8	13.7			30.8							Not Found	Peak Found	Peak Found	High	Not Found	Peak Found	Peak Found	Not Found	Peak Found	Peak Found	Not Found	Not Found	Peak Found	Not Found	Not Found	Not Found	Not Found
	FALSE	High	[R].HELTEISNVDVETQSGK.[T]			1	1	17	Q09666	Q09666 [187-203]	0	1885.91	0			426.4	92.6	96.2		160.1	157.2		27.7		190.7	38.8	370.2	97.4		142.6			Not Found	Not Found	High	High	High	Not Found	High	High	Not Found	Peak Found	Not Found	High	High	High	Peak Found	Not Found	High
	FALSE	High	[R].KGDRSPEPGQTWTR.[E]	1xPhospho [S5]	Q09666 1xPhospho [S93]	1	5	20	Q09666	Q09666 [89-102]	2	1694.76	0	66.4	40.5	41.7	6.8	47		127.3	58.1	6.7	180.2	51.9	821.6		165.4	0.6	66.7	119.2			High	High	High	Peak Found	High	Not Found	High	High	Peak Found	High	Peak Found	High	Not Found	Peak Found	Peak Found	High	High
	FALSE	High	[K].GSEVGFHGAAPDISVK.[G]			1	1	13	Q09666	Q09666 [5529-5544]	0	1570.79	0	6.4		143.9	999.3	6.8	9.7	111.6	73	61.8	40.7		57.9	142.4	21.5	79.6		32	13.4		Peak Found	Not Found	Peak Found	High	Peak Found	Peak Found	High	High	Peak Found	Peak Found	Not Found	High	High	Peak Found	High	Not Found	Peak Found
	FALSE	High	[K].GSLGATGEIK.[G]			1	1	3	Q09666	Q09666 [5463-5472]	0	932.505	0		228		759.1	188.2	86	156.2	16.5				28.4	304.8					32.9		Not Found	Peak Found	Not Found	Peak Found	Peak Found	High	Peak Found	Peak Found	Not Found	Not Found	Not Found	Peak Found	High	Not Found	Not Found	Not Found	Not Found
	FALSE	High	[K].GPAFNMASPESDFGINLK.[G]			1	1	2	Q09666	Q09666 [5545-5562]	0	1894.9	0				372.4			61.1			330.4		382.1					653.9			Not Found	Not Found	Not Found	High	Not Found	Not Found	Peak Found	Not Found	Not Found	Peak Found	Not Found	Peak Found	Not Found	Not Found	Not Found	Not Found	Peak Found
	FALSE	High	[K].GPTVGGGLPGIGVQGLEGNLQMPGIK.[S]			1	1	6	Q09666	Q09666 [5473-5498]	0	2446.31	0				1475.3									84.4		48.5			191.9		Not Found	Not Found	Not Found	High	Not Found	Not Found	Not Found	Not Found	Not Found	Not Found	Not Found	Not Found	High	Not Found	Peak Found	Not Found	Not Found
	FALSE	High	[R].GPSLQGDLAVSGDIK.[C]			1	1	2	Q09666	Q09666 [5367-5381]	0	1456.76	0				444.2			119.7					460.3			316.5		221.2	238.1		Not Found	Not Found	Not Found	High	Not Found	Not Found	Peak Found	Not Found	Not Found	Not Found	Not Found	Peak Found	Not Found	Not Found	Peak Found	Not Found	Peak Found
	FALSE	High	[K].GPSLDIDTPDVNIEGPEGK.[L]			1	1	4	Q09666	Q09666 [4423-4441]	0	1952.94	0							230.8	201.1	497.5				97.8		64.8			708		Not Found	Peak Found	Not Found	Peak Found	Peak Found	Peak Found	Peak Found	Peak Found	High	Peak Found	Peak Found	Peak Found	Peak Found	Peak Found	Peak Found	Peak Found	Peak Found
	FALSE	High	[K].GPGVDVNLK.[G]			1	1	5	Q09666	Q09666 [5435-5443]	0	898.499	0			171.1	1364.9					67.9	33			56.1	31.1	50.8		25.2			Not Found	Not Found	Peak Found	High	Not Found	Not Found	Not Found	Not Found	High	Peak Found	Not Found	Not Found	High	Peak Found	Peak Found	Not Found	Peak Found
	FALSE	High	[K].GPGVDLPSVNLSMPK.[V]			1	1	2	Q09666	Q09666 [5282-5296]	0	1510.79	0				1206.3			157.1			52.8			39.4		73.6		270.8			Not Found	Not Found	Not Found	High	Not Found	Not Found	Peak Found	Not Found	Not Found	Peak Found	Not Found	Not Found	Peak Found	Not Found	Peak Found	Not Found	Peak Found
	FALSE	High	[K].GPFVEAEVPDVDLECPDAK.[L]	1xCarbamidomethyl [C15]		1	1	10	Q09666	Q09666 [1819-1837]	0	2086.96	0			196.2	352.7	101.3	15.2	127.4	140	16.1	43.2	91	138.8	55.6	81.6	223		170.9	47		Not Found	Not Found	Peak Found	High	Peak Found	High	Peak Found	High	Peak Found	Peak Found	Peak Found	Peak Found	High	Peak Found	High	Not Found	Peak Found
	FALSE	High	[K].GPEVDVSGPK.[L]			1	1	9	Q09666	Q09666 [3331-3340]	0	984.5	1	62.9	133.8	181.7	1.4	262.6	0.2	43	211.2	0.3	212.4	252.4	36.3		41.8	86.3	229.1	44.3	0.4		Peak Found	Peak Found	High	High	Peak Found	Peak Found	High	High	Peak Found	High	Peak Found	Peak Found	Not Found	Peak Found	Peak Found	Peak Found	Peak Found
	FALSE	High	[K].GPHVDVSGPDIDIEGPEGK.[L]			1	1	6	Q09666	Q09666 [2417-2435]	0	1917.92	1				578		230.1	113.4	71.8		27.2		49	72.1	159.5	101.5		86.9	310.6		Not Found	Not Found	Not Found	High	Not Found	High	High	High	Not Found	Peak Found	Not Found	Peak Found	Peak Found	Peak Found	Peak Found	Not Found	High
	FALSE	High	[K].GPQITGPSLEGDLGLK.[G]			1	1	2	Q09666	Q09666 [372-387]	0	1581.85	0		218.2							728.5				394.4		459					Not Found	Peak Found	Not Found	Not Found	Not Found	Not Found	Not Found	Not Found	Peak Found	Not Found	Not Found	Not Found	High	Not Found	Peak Found	Not Found	Not Found
	FALSE	High	[K].GPQVSSALNLDTSK.[F]			1	1	2	Q09666	Q09666 [5599-5612]	0	1416.73	0				503.5	31.7	108.8	121.8	108.5	23.7	20.9		30.5	96.8	111.9	81.9		178.4	381.5		Not Found	Not Found	Not Found	Peak Found	Peak Found	Peak Found	Peak Found	Peak Found	Peak Found	Peak Found	Not Found	Peak Found	High	Peak Found	Peak Found	Not Found	Peak Found
FALSE	High	Master Protein	Q15149	Plectin OS=Homo sapiens OX=9606 GN=PLEC PE=1 SV=3	0	1264.05	59	264	1933	257	1	4684	531.5	5.96	44386	2132.08	262	207	7	50.5	172.7	214.2	344.7	123.9	24.6	136.9	63.7	34.1	30.3	73.4	94	75.7	57.5	129.8	21.6	68.4	83.9	8.63351e+09	2.95042e+10	3.65801e+10	5.888e+10	2.1159e+10	4.20493e+09	2.33782e+10	1.08816e+10	5.8217e+09	5.17148e+09	1.25352e+10	1.60604e+10
	Checked	Confidence	Annotated Sequence	Modifications	Modifications in Master Proteins	# Protein Groups	# Proteins	# PSMs	Master Protein Accessions	Positions in Master Proteins	# Missed Cleavages	Theo. MH+ [Da]	# Razor Quan Results	Abundances (Scaled): F1: Sample	Abundances (Scaled): F2: Sample	Abundances (Scaled): F3: Sample	Abundances (Scaled): F4: Sample	Abundances (Scaled): F5: Sample	Abundances (Scaled): F6: Sample	Abundances (Scaled): F7: Sample	Abundances (Scaled): F8: Sample	Abundances (Scaled): F9: Sample	Abundances (Scaled): F10: Sample	Abundances (Scaled): F11: Sample	Abundances (Scaled): F12: Sample	Abundances (Scaled): F13: Sample	Abundances (Scaled): F14: Sample	Abundances (Scaled): F15: Sample	Abundances (Scaled): F16: Sample	Abundances (Scaled): F17: Sample	Abundances (Scaled): F18: Sample	Quan Info	Found in Sample: [S1] F1: Sample	Found in Sample: [S2] F2: Sample	Found in Sample: [S3] F3: Sample	Found in Sample: [S4] F4: Sample	Found in Sample: [S5] F5: Sample	Found in Sample: [S6] F6: Sample	Found in Sample: [S7] F7: Sample	Found in Sample: [S8] F8: Sample	Found in Sample: [S9] F9: Sample	Found in Sample: [S10] F10: Sample	Found in Sample: [S11] F11: Sample	Found in Sample: [S12] F12: Sample	Found in Sample: [S13] F13: Sample	Found in Sample: [S14] F14: Sample	Found in Sample: [S15] F15: Sample	Found in Sample: [S16] F16: Sample	Found in Sample: [S17] F17: Sample
	FALSE	High	[R].QAEVELASR.[V]			1	1	6	Q15149	Q15149 [1649-1657]	0	1002.52	0	196		282.4	182	94.3	48.3	126.3	89.6	14	36.8		43.5	46.2	7.1	35.3	4.3	41.1	552.8		Peak Found	Not Found	Peak Found	Peak Found	Peak Found	High	Peak Found	High	Peak Found	Peak Found	Not Found	Peak Found	High	Peak Found	Peak Found	Peak Found	Peak Found
	FALSE	High	[R].QLAEEDLAQQR.[A]			1	1	12	Q15149	Q15149 [2432-2442]	0	1300.65	0			200.1	411	77.6	24.4	151	76	50.4	25.2		59.1	112.4	35.2	289.3		41.7	246.7		Not Found	Not Found	High	High	Peak Found	Peak Found	Peak Found	High	Peak Found	Peak Found	Not Found	Peak Found	High	Peak Found	High	Not Found	Peak Found
	FALSE	High	[R].QLAEAHAQAK.[A]			1	1	2	Q15149	Q15149 [1511-1520]	0	1066.56	0		28		1378.8									34		111.5		247.8			Not Found	Peak Found	Not Found	High	Not Found	Not Found	Not Found	Not Found	Not Found	Not Found	Not Found	Not Found	Peak Found	Not Found	Peak Found	Not Found	Peak Found
	FALSE	High	[R].QLLEEELAR.[L]			1	1	2	Q15149	Q15149 [1867-1875]	0	1100.59	0	6.6			903.4			38.4	14.2	46.7				64.8		712.5		13.5			Peak Found	Not Found	Not Found	High	Not Found	Not Found	Peak Found	Peak Found	Peak Found	Not Found	Not Found	Not Found	Peak Found	Not Found	High	Not Found	Peak Found
	FALSE	High	[R].QLLSPGTALILLEAQAASGFLLDPVR.[N]			1	2	6	Q15149	Q15149 [2856-2881]	0	2693.52	0				67.7	937.9							760.9	33.5							Not Found	Not Found	Not Found	High	Peak Found	High	Not Found	Not Found	Not Found	Not Found	Not Found	Peak Found	High	Not Found	Not Found	Not Found	Not Found
	FALSE	High	[R].QLEMSAEAER.[L]			1	1	2	Q15149	Q15149 [2512-2521]	0	1163.54	0	467.4		54.4	462.5	24.3	24.2	93.7	10.1		28.1	19.3	420.6	57.2	31.8	19.7	4.4	28.5	53.8		Peak Found	Not Found	Peak Found	High	Peak Found	Peak Found	Peak Found	Peak Found	Not Found	Peak Found	Peak Found	Peak Found	Peak Found	Peak Found	Peak Found	Peak Found	Peak Found
	FALSE	High	[R].QLEMSAEAER.[L]	1xOxidation [M4]		1	1	2	Q15149	Q15149 [2512-2521]	0	1179.53	0		234.7	316.5				589.3							130.5	163.2	205.1	160.7			Not Found	Peak Found	Peak Found	Not Found	Not Found	Not Found	High	Not Found	Not Found	Not Found	Not Found	Not Found	Not Found	Peak Found	Peak Found	Peak Found	Peak Found
	FALSE	High	[R].QEELYSELQAR.[E]			1	2	8	Q15149	Q15149 [3358-3368]	0	1365.66	0	292.7	252.1	17.6	388.1		18.5	32.5	6.3	32.1	25.8	51.2	4.4	76.8		417.4	123.4	36.9	24.3		Peak Found	High	Peak Found	High	Not Found	Peak Found	Peak Found	Peak Found	Peak Found	Peak Found	Peak Found	Peak Found	High	Not Found	High	Peak Found	Peak Found
	FALSE	High	[K].QEELQQLEQQR.[R]			1	2	2	Q15149	Q15149 [2707-2717]	0	1428.71	0				206.9	31			100.8				63.8	26		325.4		87.5	958.5		Not Found	Not Found	Not Found	High	Peak Found	Not Found	Not Found	Peak Found	Not Found	Not Found	Not Found	Peak Found	Peak Found	Not Found	Peak Found	Not Found	Peak Found
	FALSE	High	[R].QELEAELAK.[V]			1	1	2	Q15149	Q15149 [1888-1896]	0	1030.54	0			74.5	588.8	47.7	32.8	24.7		38.1	6.4			27.7	10.9	895.4		53			Not Found	Not Found	Peak Found	High	Peak Found	Peak Found	Peak Found	Not Found	Peak Found	Peak Found	Not Found	Not Found	Peak Found	Peak Found	Peak Found	Not Found	Peak Found
	FALSE	High	[R].QEQALLEEIER.[H]			1	2	5	Q15149	Q15149 [1387-1397]	0	1357.7	0	4.1	845.3	344		159.5	6.4	143.7		89.3	27.1			7.5		79.6		93.4			Peak Found	High	Peak Found	High	Peak Found	Peak Found	High	Peak Found	Peak Found	Peak Found	Peak Found	Peak Found	Peak Found	Peak Found	Peak Found	Peak Found	Peak Found
	FALSE	High	[R].QEQIQAMPLADSQAVR.[E]			1	2	2	Q15149	Q15149 [1367-1382]	0	1784.9	0																			No Quan Values	Not Found	Not Found	Not Found	High	Peak Found	Peak Found	Not Found	Not Found	Peak Found	Peak Found	Peak Found	Peak Found	Not Found	Not Found	Peak Found	Not Found	Not Found
	FALSE	High	[K].NLLDEELQR.[L]			1	1	3	Q15149	Q15149 [2340-2348]	0	1129.58	0			240.3	723.4	46.1		69.3	30.1	92.1	24.8	35	19	72.4	34.5	343.6		49.5	20		Not Found	Not Found	Peak Found	High	Peak Found	Not Found	Peak Found	High	Peak Found	Peak Found	Peak Found	Peak Found	Peak Found	Peak Found	Peak Found	Not Found	Peak Found
	FALSE	High	[R].NLVDNITGQR.[L]			1	2	9	Q15149	Q15149 [4438-4447]	0	1129.6	0	10.8	2.6		798.9		5	97.2	73.5	83.8		66.4	79.4	129.9	14.5	288.3		63.6	86.1		Peak Found	Peak Found	Not Found	High	Not Found	Peak Found	High	High	Peak Found	Not Found	Peak Found	High	Peak Found	Peak Found	High	Not Found	Peak Found
	FALSE	High	[R].SAEAELQSK.[R]			1	1	2	Q15149	Q15149 [1710-1718]	0	962.479	0				456.5									314.6		1028.9					Not Found	Not Found	Not Found	High	Not Found	Not Found	Not Found	Not Found	Not Found	Not Found	Not Found	Not Found	Peak Found	Not Found	Peak Found	Not Found	Not Found
	FALSE	High	[R].RYASGSSASLGGPESAVA.[-]			1	2	2	Q15149	Q15149 [4667-4684]	1	1666.8	0				714.3			77.4	67.7					149.2				791.4			Not Found	Not Found	Not Found	High	Not Found	Not Found	Peak Found	Peak Found	Not Found	Not Found	Not Found	Not Found	Peak Found	Not Found	Not Found	Not Found	Peak Found
	FALSE	High	[R].SALDQYR.[A]			1	2	4	Q15149	Q15149 [4354-4360]	0	852.421	0		284	312.1	139.9	105.5		257.1	159.4		63.2		151.4		43.3	236.5		47.5			Not Found	High	Peak Found	Peak Found	Peak Found	Not Found	Peak Found	High	Not Found	High	Not Found	Peak Found	Not Found	Peak Found	High	Not Found	Peak Found
	FALSE	High	[K].RQELEAELAK.[V]			1	1	20	Q15149	Q15149 [1887-1896]	1	1186.64	0	9.9	247.4	220	279.1	68.9	43.5	124.3	72.5	17.4	30	27.5	91.8	79.1	40.3	248.5		53.3	146.3		Peak Found	High	High	High	High	High	High	Peak Found	Peak Found	High	Peak Found	High	High	Peak Found	Peak Found	Not Found	High
	FALSE	High	[R].RQVEEEILALK.[A]			1	1	1	Q15149	Q15149 [2058-2068]	1	1327.76	0		194.3		783.5			186.1	89.8		54.4		183.5		35.4	197.6		49.4	25.9		Not Found	Peak Found	Not Found	High	Not Found	Not Found	Peak Found	Peak Found	Not Found	Peak Found	Not Found	Peak Found	Not Found	Peak Found	Peak Found	Not Found	Peak Found
	FALSE	High	[R].RQEQIQAMPLADSQAVR.[E]			1	2	4	Q15149	Q15149 [1366-1382]	1	1941	0				1667.7											132.3					Not Found	Not Found	Not Found	High	Not Found	Not Found	Not Found	Not Found	Not Found	Not Found	Not Found	Not Found	Not Found	Not Found	Peak Found	Not Found	Not Found
	FALSE	High	[R].RQQEELLAEENQR.[L]			1	2	4	Q15149	Q15149 [2718-2730]	1	1642.81	0				864.1		47.4	166	68				88.6	152.6		80.2		17.1	316		Not Found	Not Found	Not Found	High	Not Found	Peak Found	Peak Found	Peak Found	Not Found	Not Found	Not Found	Peak Found	Peak Found	Not Found	Peak Found	Not Found	Peak Found
	FALSE	High	[R].RPELEDSTLR.[Y]			1	3	11	Q15149	Q15149 [651-660]	0	1215.63	1		48.8	266.5	278.2	133.8		62.2	45.4	156.9	18.5	1.1	175.6	120.4	100.7	157.8	117.8	43.1	73.3		Not Found	Peak Found	High	High	Peak Found	Not Found	High	High	Peak Found	Peak Found	Peak Found	High	Peak Found	Peak Found	Peak Found	Peak Found	Peak Found
	FALSE	High	[R].RRQEQIQAMPLADSQAVR.[E]			1	2	3	Q15149	Q15149 [1365-1382]	2	2097.1	0				1800																Not Found	Not Found	Not Found	High	Not Found	Not Found	Not Found	Not Found	Not Found	Not Found	Not Found	Not Found	Not Found	Not Found	Not Found	Not Found	Not Found
	FALSE	High	[R].SDEGQLSPATR.[G]	1xPhospho [S7]	Q15149 1xPhospho [S720]	1	3	20	Q15149	Q15149 [714-724]	0	1240.52	1	84	442	533	14.5	229.8		112	21.5		44	106.3	8		91.9	11.7	4	97.4			High	High	High	High	High	Not Found	High	High	Not Found	High	Peak Found	Peak Found	Not Found	High	High	Peak Found	Peak Found
	FALSE	High	[R].SDEGQLSPATR.[G]			1	3	5	Q15149	Q15149 [714-724]	0	1160.55	0	51.9	445.2	393.9	7.8	93		262.9	149.6		35.3	36.7	46.3			81.8		195.7			High	High	Peak Found	Peak Found	Peak Found	Not Found	Peak Found	Peak Found	Not Found	Peak Found	Peak Found	High	Not Found	Not Found	Peak Found	Not Found	Peak Found
	FALSE	High	[K].SEEMQTVQQEQLLQETQALQQSFLSEKDSLLQR.[E]			1	1	2	Q15149	Q15149 [2610-2642]	1	3892.92	0				1755.3														44.7		Not Found	Not Found	Not Found	High	Not Found	Not Found	Not Found	Not Found	Not Found	Not Found	Not Found	Not Found	Not Found	Not Found	Not Found	Not Found	Not Found
	FALSE	High	[K].SEEMQTVQQEQLLQETQALQQSFLSEK.[D]			1	1	2	Q15149	Q15149 [2610-2636]	0	3180.54	0				560.8														1239.2		Not Found	Not Found	Not Found	High	Not Found	Not Found	Not Found	Not Found	Not Found	Not Found	Not Found	Not Found	Not Found	Not Found	Not Found	Not Found	Not Found
	FALSE	High	[R].SELELTLGKLEQVR.[S]			1	2	3	Q15149	Q15149 [1202-1215]	1	1614.91	0				326.1			152.5	50.4				259.6	494.9		516.5					Not Found	Not Found	Not Found	High	Not Found	Not Found	Peak Found	Peak Found	Not Found	Not Found	Not Found	Peak Found	Peak Found	Not Found	High	Not Found	Not Found
	FALSE	High	[R].SELELTLGK.[L]			1	2	2	Q15149	Q15149 [1202-1210]	0	989.551	0				85.5		158	88.1	72.5				126.6		240.6	549.8	315.7	122.4	40.7		Not Found	Not Found	Not Found	Peak Found	Not Found	High	Peak Found	Peak Found	Not Found	Not Found	Not Found	Peak Found	Not Found	Peak Found	Peak Found	Peak Found	Peak Found
	FALSE	High	[R].QTNLENLDQAFSVAER.[D]			1	3	8	Q15149	Q15149 [350-365]	0	1834.89	0		224.8	55.7	120.1	97.8	7.1	103	101.3	29	17.8	756.3	54.1	50.5		102.6		16.6	63.1		Not Found	Peak Found	Peak Found	High	High	Peak Found	Peak Found	Peak Found	Peak Found	Peak Found	Peak Found	Peak Found	High	Not Found	Peak Found	Not Found	Peak Found
	FALSE	High	[R].QTLSIYQALKK.[G]			1	2	4	Q15149	Q15149 [3839-3849]	1	1292.76	0				1386.9			9.7	21.3					191.2		190.8					Not Found	Not Found	Not Found	Peak Found	Not Found	High	Peak Found	Peak Found	Not Found	Not Found	Not Found	Not Found	High	Not Found	Peak Found	Not Found	Not Found
	FALSE	High	[R].QTLSIYQALK.[K]			1	2	2	Q15149	Q15149 [3839-3848]	0	1164.66	0				938.5	112.1		117.5	70.6	173.5	47.8		81.2	164	28.1	46		20.8			Not Found	Not Found	Not Found	Peak Found	Peak Found	Not Found	Peak Found	Peak Found	Peak Found	Peak Found	Not Found	Peak Found	High	Peak Found	Peak Found	Not Found	Peak Found
	FALSE	High	[K].QRLEAEAGR.[F]			1	1	2	Q15149	Q15149 [1924-1932]	1	1029.54	0		133		432.4	145.4	453.5							148.3			20.1		467.3		Not Found	Peak Found	Not Found	High	Peak Found	Peak Found	Not Found	Not Found	Not Found	Not Found	Not Found	Not Found	Peak Found	Not Found	Not Found	Peak Found	Not Found
	FALSE	High	[R].QSSEAEIQAK.[A]			1	1	2	Q15149	Q15149 [1564-1573]	0	1090.54	0						1800														Not Found	Not Found	Not Found	Not Found	Not Found	High	Not Found	Not Found	Not Found	Not Found	Not Found	Not Found	Not Found	Not Found	Not Found	Not Found	Not Found
	FALSE	High	[R].QVQVALETAQR.[S]			1	1	19	Q15149	Q15149 [1699-1709]	0	1242.68	0			291.8	421.2	74.6	58.3	135.1	65.5		38.3		117.8	111.1		217		36.8	232.5		Peak Found	High	High	High	High	High	High	High	Peak Found	Peak Found	Not Found	High	High	Not Found	High	Not Found	Peak Found
	FALSE	High	[R].QVEEEILALK.[A]			1	1	4	Q15149	Q15149 [2059-2068]	0	1171.66	0		356.6	67.4	415.1		20.3	91.2	61.5	71.7	30.4			89.7	129.5	378.1		65	23.6		Not Found	Peak Found	Peak Found	Peak Found	Not Found	Peak Found	High	High	Peak Found	Peak Found	Not Found	Not Found	High	Peak Found	Peak Found	Not Found	Peak Found
	FALSE	High	[K].QVEVTVHKGDECQLVGPAQPSHWK.[V]	1xCarbamidomethyl [C12]		1	2	1	Q15149	Q15149 [954-977]	1	2729.35	0																			No Quan Values	Not Found	Not Found	Not Found	High	Not Found	Not Found	Not Found	Not Found	Not Found	Not Found	Not Found	Not Found	Not Found	Not Found	Not Found	Not Found	Not Found
	FALSE	High	[K].QITMEELVR.[S]			1	2	2	Q15149	Q15149 [4028-4036]	0	1118.59	0	42.5	324.2		1353.1		67.5											12.6			Peak Found	Peak Found	Not Found	High	Not Found	Peak Found	Not Found	Not Found	Not Found	Not Found	Not Found	Not Found	Not Found	Not Found	Not Found	Not Found	Peak Found
	FALSE	High	[R].QLQLAQEAAQKR.[L]			1	1	2	Q15149	Q15149 [2172-2183]	1	1383.77	0				249.9			60.8			57.5		160.4			1085			186.3		Not Found	Not Found	Not Found	High	Not Found	Not Found	Peak Found	Not Found	Not Found	Peak Found	Not Found	Peak Found	Not Found	Not Found	High	Not Found	Not Found
	FALSE	High	[R].QLQLAQEAAQK.[R]			1	1	7	Q15149	Q15149 [2172-2182]	0	1227.67	0			311.4	599.7	74.9		128.6	52.5	13.2	27.8		76.3	4.8	17.7	144.9		52.3	296		Not Found	Not Found	High	High	High	Not Found	Peak Found	Peak Found	Peak Found	Peak Found	Not Found	Peak Found	Peak Found	Peak Found	Peak Found	Not Found	Peak Found
	FALSE	High	[R].QQGLASYDYVR.[R]			1	2	4	Q15149	Q15149 [3771-3781]	0	1299.63	0			83.2	543.3	94.2	14.9	249.1	83.4	136.3	31.7		115.3	205.1	38	193.2	6.6	5.8			Not Found	Not Found	Peak Found	High	Peak Found	Peak Found	High	Peak Found	Peak Found	Peak Found	Not Found	High	Peak Found	Peak Found	Peak Found	Peak Found	Peak Found
	FALSE	High	[R].QQEELLAEENQR.[L]			1	2	10	Q15149	Q15149 [2719-2730]	0	1486.71	1		298.8	192.4	357.8	95.5	31	185.8	81.3	41.2	40.8	101.4			21.9	222.3	7.1	28.1	94.6		Peak Found	High	Peak Found	High	Peak Found	Peak Found	High	Peak Found	Peak Found	Peak Found	Peak Found	Peak Found	Not Found	Peak Found	High	Peak Found	High
	FALSE	High	[R].RKQEELQQLEQQR.[R]			1	2	9	Q15149	Q15149 [2705-2717]	2	1712.9	0		5.6		624.6		66	198.3	18.3	19.4	39.7		166.4	224.9		26		321.8	89.1		Not Found	Peak Found	Not Found	High	Not Found	High	High	Peak Found	Peak Found	Peak Found	Not Found	Peak Found	High	Not Found	Peak Found	Not Found	Peak Found
	FALSE	High	[R].RLQEDKEQMAQQLAEETQGFQR.[T]			1	1	3	Q15149	Q15149 [2482-2503]	2	2663.28	0				1075.9									171.3	48.4			192.7	311.8		Not Found	Not Found	Not Found	High	Not Found	Not Found	Not Found	Not Found	Not Found	Not Found	Not Found	Not Found	Peak Found	Peak Found	Not Found	Not Found	Peak Found
	FALSE	High	[R].RLTVNEAVK.[E]			1	2	2	Q15149	Q15149 [2884-2892]	1	1029.61	0				1018.7									781.3							Not Found	Not Found	Not Found	High	Not Found	Not Found	Not Found	Not Found	Not Found	Not Found	Not Found	Not Found	Peak Found	Not Found	Not Found	Not Found	Not Found
	FALSE	High	[R].RDDGTGQLLLPLSDAR.[K]			1	2	2	Q15149	Q15149 [4003-4018]	1	1726.91	0		137.9	79.7			10.2	158.3	82.4	293.7	15.6		3.3	14.4		950.6		8	45.9		Not Found	High	Peak Found	Not Found	Not Found	Peak Found	Peak Found	Peak Found	Peak Found	Peak Found	Not Found	Peak Found	Peak Found	Not Found	Peak Found	Not Found	Peak Found
	FALSE	High	[K].RASFAEKTAQLER.[S]	1xPhospho [T/S]	Q15149 1xPhospho [S/T]	1	1	2	Q15149	Q15149 [1719-1731]	2	1586.77	0																			No Quan Values	Not Found	Not Found	Not Found	Not Found	Not Found	High	Not Found	Not Found	Not Found	Not Found	Not Found	Not Found	Not Found	Not Found	Not Found	Not Found	Not Found
	FALSE	High	[R].REEAAVDAQQQK.[R]			1	1	4	Q15149	Q15149 [1541-1552]	1	1372.68	0				1239.1									547		13.9					Not Found	Not Found	Not Found	Peak Found	Not Found	High	Not Found	Not Found	Not Found	Not Found	Not Found	Not Found	High	Not Found	Peak Found	Not Found	Not Found
	FALSE	High	[K].QYINAIKDYELQLVTYK.[A]			1	2	3	Q15149	Q15149 [1411-1427]	1	2102.12	0				112.6	111.8	584.1	18.8	41.5	131.1	295.5	219.1	7.5	4.2		53.1	220.7				Not Found	Not Found	Not Found	High	Peak Found	Peak Found	Peak Found	Peak Found	Peak Found	Peak Found	Peak Found	Peak Found	Peak Found	Not Found	Peak Found	Peak Found	Not Found
	FALSE	High	[R].QYDIDDAIAK.[N]			1	2	6	Q15149	Q15149 [4339-4348]	0	1151.56	0	43.1			556.5		334.8	82	56.9	98.8	22.3			112.5		489.7	3.4				Peak Found	Not Found	Not Found	Peak Found	Not Found	Peak Found	High	High	Peak Found	Peak Found	Not Found	Not Found	High	Not Found	High	Peak Found	Not Found
	FALSE	High	[K].LQMEAGLCEEQLNQADALLQSDVR.[L]	1xCarbamidomethyl [C8]		1	3	2	Q15149	Q15149 [538-561]	0	2731.3	0				1710.1						89.9										Not Found	Not Found	Not Found	High	Not Found	Not Found	Not Found	Not Found	Not Found	Peak Found	Not Found	Not Found	Not Found	Not Found	Not Found	Not Found	Not Found
	FALSE	High	[R].LQLEATER.[Q]			1	1	2	Q15149	Q15149 [1596-1603]	0	959.516	0	50.5	236.5	330	296.6	128.2		115.4	83.2	34.3	42.6	55.3	46.5	73.8	26.1	175.1		29	77.1		Peak Found	High	Peak Found	Peak Found	Peak Found	Not Found	High	Peak Found	Peak Found	Peak Found	Peak Found	Peak Found	Peak Found	Peak Found	Peak Found	Not Found	Peak Found
	FALSE	High	[R].LQLEACETR.[T]	1xCarbamidomethyl [C6]		1	2	8	Q15149	Q15149 [1131-1139]	0	1119.55	0	12.4	190.7	140.7	378.1	45.4	47.8	63.1	66.2	85	53.8	25.8	37.8	109.1	12.2	310.3	6	20.8	194.8		Peak Found	High	Peak Found	High	Peak Found	High	Peak Found	Peak Found	Peak Found	Peak Found	Peak Found	Peak Found	High	Peak Found	Peak Found	Peak Found	Peak Found
	FALSE	High	[K].LQNVQIALDYLR.[H]			1	6	19	Q15149	Q15149 [237-248]	0	1445.81	0	23.8	158.5	61.4	254.2	177.1	56	201.7	117	34.4	86	74.8	184.3	181.4	55.5	64.8	28	41.1			Peak Found	High	Peak Found	High	High	High	High	High	High	Peak Found	Peak Found	High	High	Peak Found	High	Peak Found	Peak Found
	FALSE	High	[R].LPVEVAYKR.[G]			1	2	1	Q15149	Q15149 [4198-4206]	1	1074.63	0				1450.3				150.3							199.3					Not Found	Not Found	Not Found	High	Not Found	Not Found	Not Found	Peak Found	Not Found	Not Found	Not Found	Not Found	Not Found	Not Found	Peak Found	Not Found	Not Found
	FALSE	High	[R].LPVEVAYK.[R]			1	2	1	Q15149	Q15149 [4198-4205]	0	918.529	0				1194.7			204.2	62.7	109.8	52.1		19.7	81.7		53.5		21.6			Not Found	Not Found	Not Found	High	Not Found	Not Found	Peak Found	Peak Found	Peak Found	Peak Found	Not Found	Peak Found	Peak Found	Not Found	Peak Found	Not Found	Peak Found
	FALSE	High	[R].LQAEEVAQQK.[S]			1	1	12	Q15149	Q15149 [1783-1792]	0	1143.6	0	65.1	482.2	442.2	86.8	128.1		285.5			56.5	37.8	65.6	57.3	59	33.7					High	Peak Found	High	High	High	Not Found	High	High	Not Found	Peak Found	Peak Found	Peak Found	Peak Found	Peak Found	Peak Found	Not Found	Not Found
	FALSE	High	[R].LQAEEAER.[R]			1	1	2	Q15149	Q15149 [1680-1687]	0	945.464	0			110.7	229.3	382.4	25.9	356			44.6			183.4		296.8			170.9		Not Found	Not Found	Peak Found	Peak Found	Peak Found	Peak Found	Peak Found	Not Found	Not Found	Peak Found	Not Found	Not Found	Peak Found	Not Found	High	Not Found	Not Found
	FALSE	High	[R].LQEDKEQMAQQLAEETQGFQR.[T]			1	1	2	Q15149	Q15149 [2483-2503]	1	2507.18	0				1632.4					167.6											Not Found	Not Found	Not Found	High	Not Found	Not Found	Not Found	Not Found	Peak Found	Not Found	Not Found	Not Found	Not Found	Not Found	Not Found	Not Found	Not Found
	FALSE	High	[R].LQEAGILSAEELQR.[L]			1	2	25	Q15149	Q15149 [2795-2808]	0	1556.83	0	32.6	160.9	264.6	346.6	125	19.7	119.3	73.8	60	29		107.5	81.2	38.3	102.8		50.5	188.5		High	High	High	High	High	High	High	High	Peak Found	High	Not Found	High	High	Peak Found	High	Not Found	Peak Found
	FALSE	High	[R].LSFSGLR.[A]			1	2	3	Q15149	Q15149 [3440-3446]	0	779.441	1		189.7	203.9	413.5	147.2	9.7	102.2	47.7	60.4	6.9	143	14.9	211.2		14.8		44.7	190.2		Not Found	Peak Found	Peak Found	High	Peak Found	High	Peak Found	Peak Found	Peak Found	Peak Found	Peak Found	Peak Found	Peak Found	Not Found	Peak Found	Not Found	Peak Found
	FALSE	High	[K].LSIYNALKK.[D]			1	2	3	Q15149	Q15149 [3175-3183]	1	1049.64	0			910.3	394.3	162.7		41.1	28.7	8	41.3		103.9	64.8		43.2			1.7		Not Found	Not Found	Peak Found	High	Peak Found	Not Found	High	High	Peak Found	Peak Found	Not Found	Peak Found	Peak Found	Not Found	Peak Found	Not Found	Not Found
	FALSE	High	[K].LSIYNALK.[K]			1	2	1	Q15149	Q15149 [3175-3182]	0	921.54	0					774.4	58.3	21.9	20.8		45.9	285	64.7		49.3		157.4	173.3	149		Not Found	Not Found	Not Found	Not Found	Peak Found	Peak Found	Peak Found	Peak Found	Not Found	Peak Found	Peak Found	Peak Found	Not Found	Peak Found	Not Found	Peak Found	Peak Found
	FALSE	High	[R].LRLPLDKEPAR.[E]			1	2	2	Q15149	Q15149 [1144-1154]	2	1307.78	0		41.9		936.2			169.2	134.4	16.2	62.4		160.5	205.7		42.2		9.9	21.5		Not Found	Peak Found	Not Found	High	Not Found	Not Found	Peak Found	Peak Found	Peak Found	Peak Found	Not Found	Peak Found	High	Not Found	Peak Found	Not Found	Peak Found
	FALSE	High	[R].LRAETEQGEQQR.[Q]			1	1	10	Q15149	Q15149 [1855-1866]	1	1444.71	0				451.5		15.7				6.7	261		9.2	7.7	981.4			66.8		Not Found	Not Found	Not Found	High	Not Found	Peak Found	Not Found	Not Found	Not Found	Peak Found	Peak Found	Not Found	High	Peak Found	High	Not Found	Not Found
	FALSE	High	[R].LREQLQLLEEQHR.[A]			1	2	4	Q15149	Q15149 [2731-2743]	1	1691.92	0				1043.3			109.2	55.6		70.4	46.7	206.7	196.8		51.7		7.6	12		Not Found	Not Found	Not Found	High	Not Found	Not Found	Peak Found	Peak Found	Not Found	Peak Found	Peak Found	Peak Found	High	Not Found	Peak Found	Not Found	Peak Found
	FALSE	High	[K].LISLFQAMK.[K]			1	2	4	Q15149	Q15149 [4159-4167]	0	1050.6	0	110.6			1373.8		19.7			54.4	5.3			135.9		41.1			59.1		Peak Found	Not Found	Not Found	High	Not Found	High	Not Found	Not Found	Peak Found	Peak Found	Not Found	Not Found	High	Not Found	Peak Found	Not Found	Not Found
	FALSE	High	[R].IISLETYNLLR.[E]			1	2	14	Q15149	Q15149 [3794-3804]	0	1334.77	0		9	32.1	720.4	82.2	81.4	148.2	107	39.2	30.4	10.9	113.3	250.9	40.6	30.4		47	56.9		Not Found	Peak Found	High	Peak Found	High	High	High	High	High	Peak Found	Peak Found	High	High	High	Peak Found	Not Found	High
	FALSE	High	[K].IIITVVEEQEQK.[G]			1	2	10	Q15149	Q15149 [3095-3106]	0	1428.79	0		23.1	343.6	391.3	126.7		160.8	66.1	19.3	70.7		154.2	95.5	99.6	144.4		97.7	7		Not Found	Peak Found	High	High	Peak Found	Not Found	High	High	Peak Found	High	Not Found	High	Peak Found	High	Peak Found	Not Found	Peak Found
	FALSE	High	[K].ILITIVEEVETLRQER.[L]			1	2	2	Q15149	Q15149 [3424-3439]	1	1941.1	0				96			248.3	247				595.9	222.6		390.2					Not Found	Not Found	Not Found	High	Not Found	Not Found	Peak Found	Peak Found	Not Found	Not Found	Not Found	Peak Found	Peak Found	Not Found	High	Not Found	Not Found
	FALSE	High	[K].ILITIVEEVETLR.[Q]			1	2	24	Q15149	Q15149 [3424-3436]	0	1527.9	0		72.4	63.7	57	40.3		319.7	85.4	8.3	27.1	83.9	681.2	26.9	173.7	49.4		110.9			Not Found	High	High	High	High	Not Found	High	High	Peak Found	High	Peak Found	High	High	High	High	Not Found	High
	FALSE	High	[R].LPLLAVCDYK.[Q]	1xCarbamidomethyl [C7]		1	2	2	Q15149	Q15149 [944-953]	0	1191.64	0		6.8	210.8	232.5	52.7	31.6		1.6	4.6	9	343.6	25.2	7.1		10.5	824.9	39.1			Not Found	Peak Found	Peak Found	High	Peak Found	Peak Found	Not Found	Peak Found	Peak Found	Peak Found	Peak Found	Peak Found	Peak Found	Not Found	Peak Found	Peak Found	Peak Found
	FALSE	High	[R].LYVHEAVK.[A]			1	2	3	Q15149	Q15149 [3544-3551]	0	958.536	1				458.1	86.5	174.9	100.6	164.6		45.8		136.4	217.2	99.7	56		134.1	126		Not Found	Not Found	Not Found	High	Peak Found	Peak Found	Peak Found	Peak Found	Not Found	Peak Found	Not Found	Peak Found	High	Peak Found	Peak Found	Not Found	Peak Found
	FALSE	High	[R].MGIVGPEFK.[D]			1	2	1	Q15149	Q15149 [4130-4138]	0	977.512	1	25.5	124.4		1202.4	15.5		6	5.4	293.6	8.7	7.7	4	89.8		13.6		3.3			Peak Found	Peak Found	Not Found	High	Peak Found	Not Found	Peak Found	Peak Found	Peak Found	Peak Found	Peak Found	Peak Found	Peak Found	Not Found	Peak Found	Not Found	Peak Found
	FALSE	High	[R].LTVDEAVR.[AK]			1	2	20	Q15149	Q15149 [3213-3220]; [3879-3886]	0	902.494	0		12.6	329.6	617.9	112.1		155	96.2	32.6	17.9	28.5	12.9	72.3	29	267.6		11.1	4.6		Not Found	Peak Found	High	High	High	High	High	High	High	High	High	High	High	High	High	Not Found	Peak Found
	FALSE	High	[R].LSVAAQEAAR.[L]			1	1	18	Q15149	Q15149 [2420-2429]	0	1015.55	0	15.3	232.9	322.6	281.8	71.5	79.7	126.2	91	20.5	37.1		113.8	143.8	28.8	50	8.8	10.1	166.1		Peak Found	High	High	High	High	Peak Found	High	Peak Found	High	Peak Found	Not Found	Peak Found	High	Peak Found	High	Peak Found	Peak Found
	FALSE	High	[R].LSVYQAMK.[K]	1xOxidation [M7]		1	2	2	Q15149	Q15149 [4084-4091]	0	955.492	0	56	210.5	377.6	6.9			452.1	396.4		65.2					235.3					Peak Found	Peak Found	Peak Found	Peak Found	Not Found	Not Found	Peak Found	High	Not Found	Peak Found	Not Found	Not Found	Not Found	Not Found	Peak Found	Not Found	Not Found
	FALSE	High	[K].LSVYAALQR.[Q]			1	2	7	Q15149	Q15149 [2847-2855]	0	1020.58	0		9.5	251.1	741.5	31.9	13.2	101.3	89.3	35.8	54	19	97.7	149.4		11.9	170.6	14	9.9		Not Found	Peak Found	Peak Found	High	Peak Found	Peak Found	High	Peak Found	Peak Found	Peak Found	Peak Found	Peak Found	High	Not Found	Peak Found	Peak Found	Peak Found
	FALSE	High	[K].ISYKDALDR.[S]			1	2	1	Q15149	Q15149 [4581-4589]	1	1080.57	0				1005.7				100.2		87.6		23.5	583							Not Found	Not Found	Not Found	Peak Found	Not Found	Not Found	Not Found	Peak Found	Not Found	Peak Found	Not Found	Peak Found	High	Not Found	Not Found	Not Found	Not Found
	FALSE	High	[R].LTAEDLFEAR.[I]			1	2	13	Q15149	Q15149 [3784-3793]	0	1164.59	0		140.8	146.6	416.3	146.7	30.3	110.2	122.8	25.2	36.8	1.6	81.6	95.8	23.5	254.5	21.2	39.2	106.7		Not Found	High	Peak Found	High	Peak Found	High	High	High	High	Peak Found	Peak Found	High	Peak Found	Peak Found	High	Peak Found	Peak Found
	FALSE	High	[R].LSYTQLLR.[R]			1	2	3	Q15149	Q15149 [3992-3999]	0	993.573	0		49.4	267.5	459.1	73.6	35.8	97.7	60.3	62.8	26.3	31.6	251.2	123.3	48.5	43.6	3.7	9.6	155.8		Not Found	Peak Found	Peak Found	Peak Found	Peak Found	Peak Found	Peak Found	High	Peak Found	Peak Found	Peak Found	High	Peak Found	Peak Found	Peak Found	Peak Found	Peak Found
	FALSE	High	[KR].LTVEEAVR.[MH]			2	5	2	Q15149; H3BQK9	Q15149 [4122-4129]; H3BQK9 [1821-1828]	0	916.51	0			280.9	672.9	93.3		129.5	122.9	45.6	36.5		5.9	124.2	27	232.5		28.9		Shared	Not Found	Not Found	Peak Found	Peak Found	Peak Found	Not Found	Peak Found	Peak Found	Peak Found	Peak Found	Not Found	Peak Found	Peak Found	Peak Found	High	Not Found	Peak Found
	FALSE	High	[R].LVASMEEARR.[R]			1	2	1	Q15149	Q15149 [2685-2694]	1	1161.6	0		401.8		1213.3								184.9								Not Found	Peak Found	Not Found	High	Not Found	Not Found	Not Found	Not Found	Not Found	Not Found	Not Found	Peak Found	Not Found	Not Found	Not Found	Not Found	Not Found
	FALSE	High	[R].LTVNEAVK.[E]			1	2	5	Q15149	Q15149 [2885-2892]	0	873.504	0		326.8	402.3	158.4	144.7		228.1	142.5	7.8	65.3		89.9	46.3	72	56.2		50.1	9.5		Not Found	High	High	High	Peak Found	Not Found	Peak Found	Peak Found	Peak Found	Peak Found	Not Found	Peak Found	Peak Found	Peak Found	Peak Found	Not Found	Peak Found
	FALSE	High	[K].VLALPEPSPAAPTLR.[S]			1	2	15	Q15149	Q15149 [1187-1201]	0	1531.88	0			334.6	418.9	165	46.7	144.6	89.6	43.3	25.1	29.9	84.9	83.1	37.4	109.6		78.4	108.9		Not Found	Not Found	High	High	High	High	High	High	Peak Found	High	Peak Found	High	Peak Found	Peak Found	High	Not Found	High
	FALSE	High	[R].VKAEAEAAR.[E]			1	1	5	Q15149	Q15149 [1658-1666]	1	944.516	0				733.2		430.6			95.2				469.9					71.2		Not Found	Not Found	Not Found	High	Not Found	High	Not Found	Not Found	Peak Found	Not Found	Not Found	Not Found	High	Not Found	Not Found	Not Found	Not Found
	FALSE	High	[R].VIDRELYQQLQR.[G]			1	2	8	Q15149	Q15149 [3128-3139]	1	1560.85	0				1090.4			55.1	51					581.2		22.2					Not Found	Not Found	Not Found	High	Not Found	Not Found	Peak Found	Peak Found	Not Found	Not Found	Not Found	Not Found	High	Not Found	Peak Found	Not Found	Not Found
	FALSE	High	[R].VPDVQDGVR.[A]			1	3	5	Q15149	Q15149 [402-410]	0	984.511	0			273.2	389.5	90.2		186.9	187.9		36.9		179.9			294.3		161.3			Not Found	Not Found	Peak Found	High	Peak Found	Not Found	High	Peak Found	Not Found	Peak Found	Not Found	High	Not Found	Not Found	Peak Found	Not Found	High
	FALSE	High	[R].VPLDEALQR.[G]			1	2	5	Q15149	Q15149 [4543-4551]	0	1040.57	0		12.6	73.6	552.6	73.4		99.8	107.3	187.1	59.7			73.4		136	301.3	123.2			Not Found	Peak Found	Peak Found	High	Peak Found	Peak Found	High	Peak Found	Peak Found	Peak Found	Not Found	High	Peak Found	Peak Found	Peak Found	Peak Found	High
	FALSE	High	[R].VPLDVACAR.[G]	1xCarbamidomethyl [C7]		1	2	5	Q15149	Q15149 [3289-3297]	0	1000.52	0			52.5	267.6	28.6	5.1	155.5	9.1	14.8	8.3	1.5	575.3	1.1	95.3	105.2		340.1	140.1		Not Found	Not Found	Peak Found	High	Peak Found	Peak Found	Peak Found	Peak Found	Peak Found	Peak Found	Peak Found	High	Peak Found	Peak Found	Peak Found	Not Found	Peak Found
	FALSE	High	[R].VPVDVAYR.[RC]			2	4	6	P58107; Q15149	P58107 [738-745]; [1699-1706]; [2357-2364]; [3424-3431]; [3958-3965]; [4492-4499]; [5025-5032]; Q15149 [2961-2968]	0	918.504	0	85		411.5	660.8	101.4		91.8	67.9	40.1	38.6		104.5			111.8		86.6		Shared	Peak Found	Not Found	Peak Found	High	Peak Found	Not Found	Peak Found	Peak Found	Peak Found	High	Not Found	Peak Found	Not Found	Not Found	High	Not Found	High
	FALSE	High	[R].VPVDVAYQR.[G]			2	4	14	P58107; Q15149	P58107 [2893-2901]; Q15149 [3620-3628]	0	1046.56	0		146.5	163.9	476.1	59.1	5.2	84.9	83.1	93.4	26		92.1	34.8		249.9		65.3	219.9	Shared	Not Found	High	High	High	High	Peak Found	High	Peak Found	Peak Found	Peak Found	Not Found	High	Peak Found	Not Found	High	Not Found	High
	FALSE	High	[K].VLSSSGSEAAVPSVCFLVPPPNQEAQEAVTR.[L]	1xCarbamidomethyl [C15]		1	2	1	Q15149	Q15149 [978-1008]	0	3226.6	0				462.3				291.1				790.9			255.7					Not Found	Not Found	Not Found	High	Not Found	Not Found	Not Found	Peak Found	Not Found	Not Found	Not Found	Peak Found	Not Found	Not Found	Peak Found	Not Found	Not Found
	FALSE	High	[R].VDGAEWGVDLPSVEAQLGSHR.[G]			1	3	4	Q15149	Q15149 [676-696]	0	2222.08	0		7.2	99	795.4		105.4	6	12.2	36.7	17	235.4	42.8	236.1		25.4	7.2	45.4	128.9		Not Found	Peak Found	Peak Found	High	Not Found	Peak Found	Peak Found	Peak Found	Peak Found	Peak Found	Peak Found	Peak Found	Peak Found	Not Found	Peak Found	Peak Found	Peak Found
	FALSE	High	[R].VAQLLER.[W]			1	2	5	Q15149	Q15149 [1318-1324]	0	828.494	1		215.4	392.2	54.4	127.7	2.1	233.3	150.6	21.1	27.4	9.6	204	4	311.4	29.4		3.4	13.9		Not Found	High	Peak Found	Peak Found	Peak Found	Peak Found	High	High	Peak Found	High	Peak Found	High	Peak Found	Peak Found	Peak Found	Not Found	Peak Found
	FALSE	High	[R].YLQDLLAWVEENQHR.[V]			1	3	6	Q15149	Q15149 [661-675]	0	1913.95	0			3.6	844.2		115	5.4	8.7	90.6	80.4		23.1	576.2	3.2	3.9		42.7	3.2		Not Found	Not Found	Peak Found	High	Not Found	High	Peak Found	Peak Found	Peak Found	High	Not Found	Peak Found	High	Peak Found	Peak Found	Not Found	Peak Found
	FALSE	High	[R].YYRESADPLGAWLQDAR.[R]			1	2	1	Q15149	Q15149 [1348-1364]	1	2010.97	0	1395.2			233		45.7				55			22.5				48.6			Peak Found	Not Found	Not Found	High	Not Found	Peak Found	Not Found	Not Found	Not Found	Peak Found	Not Found	Not Found	Peak Found	Not Found	Not Found	Not Found	Peak Found
	FALSE	High	[K].VTLVQTLEIQR.[Q]			1	1	13	Q15149	Q15149 [2565-2575]	0	1299.76	0				592.6	137.8	1.8	189.2	122	64.2	52.9		161.8	90.8		180.3		38.4	168.1		Not Found	Not Found	High	High	Peak Found	Peak Found	High	High	Peak Found	Peak Found	Not Found	Peak Found	High	Not Found	High	Not Found	High
	FALSE	High	[K].VQSGSESVIQEYVDLR.[T]			1	2	12	Q15149	Q15149 [1442-1457]	0	1808.9	0		91.1	8	498.8	116.2	51	115.8	46.4	38.2	147.5		210.6	182.7		24.3		45.5	223.7		Not Found	Peak Found	Peak Found	High	Peak Found	High	Peak Found	Peak Found	Peak Found	High	Not Found	High	High	Not Found	Peak Found	Not Found	Peak Found
	FALSE	High	[K].VSIYEAMR.[R]	1xOxidation [M7]		1	2	1	Q15149	Q15149 [3506-3513]	0	984.482	0					324.7			515.9					29					930.4		Not Found	Not Found	Not Found	Not Found	Peak Found	Not Found	Not Found	High	Not Found	Not Found	Not Found	Not Found	Peak Found	Not Found	Not Found	Not Found	Not Found
	FALSE	High	[K].VSIYEAMR.[R]			1	2	3	Q15149	Q15149 [3506-3513]	0	968.487	1				1502.9			18.5			41			182.3		55.3					Not Found	Not Found	Not Found	High	Not Found	Not Found	Peak Found	Not Found	Not Found	Peak Found	Not Found	Not Found	High	Not Found	Peak Found	Not Found	Not Found
	FALSE	High	[R].WQAVLAQTDVR.[Q]			1	2	13	Q15149	Q15149 [1325-1335]	0	1286.69	1		680		405.4	27.1	38.8	89.5	68.2	46.1	26.9		90.8	127.2	40.3	105.2	12.9	20.7	20.9		Not Found	Peak Found	Not Found	High	Peak Found	High	High	Peak Found	High	Peak Found	Not Found	High	High	Peak Found	High	Peak Found	Peak Found
	FALSE	High	[R].VVIVDPETGKEMSVYEAYRK.[G]			1	2	1	Q15149	Q15149 [4278-4297]	2	2313.18	0				1066.4					87.7				554.7					91.2		Not Found	Not Found	Not Found	High	Not Found	Not Found	Not Found	Not Found	Peak Found	Not Found	Not Found	Not Found	Peak Found	Not Found	Not Found	Not Found	Not Found
	FALSE	High	[R].VVIVDPETGK.[E]			1	2	4	Q15149	Q15149 [4278-4287]	0	1056.59	0				780.2		3.2	156.4	119.8	138.6	52.5		95.2	30.1		27.6		41.6	354.6		Not Found	Not Found	Not Found	High	Not Found	Peak Found	Peak Found	Peak Found	Peak Found	Peak Found	Not Found	Peak Found	Peak Found	Not Found	Peak Found	Not Found	Peak Found
	FALSE	High	[R].SQVMDEATALQLR.[E]			1	2	4	Q15149	Q15149 [4037-4049]	0	1461.74	0		154.5		1094.1		86.5		4	31.9	17.6			132.2		115.3			163.8		Not Found	Peak Found	Not Found	High	Not Found	Peak Found	Not Found	Peak Found	Peak Found	Peak Found	Not Found	Not Found	Peak Found	Not Found	Peak Found	Not Found	Not Found
	FALSE	High	[R].SQVEEELFSVR.[V]			1	1	12	Q15149	Q15149 [2361-2371]	0	1322.66	0	105.9	756.2		32.4	76.4		11.1	8	7.6		160.7	22.1		57.8	19.3		43.7	498.8		Peak Found	High	High	Peak Found	Peak Found	Not Found	High	High	Peak Found	Peak Found	Peak Found	High	Peak Found	Peak Found	Peak Found	Peak Found	High
	FALSE	High	[R].SSIAGLLLK.[A]			1	2	4	Q15149	Q15149 [2833-2841]	0	901.572	0	87.1	398.7		433.4	107.8	49.3	117.6	116.4		35		45.2	119.8	125	56.5	70.2	38.1			Peak Found	Peak Found	Not Found	High	Peak Found	High	High	High	Not Found	Peak Found	Not Found	Peak Found	Peak Found	Peak Found	Peak Found	Peak Found	Peak Found
	FALSE	High	[R].SYVDPSTDER.[L]			1	2	9	Q15149	Q15149 [3982-3991]	0	1168.51	0	27.7	184.6	166	417	89.9		119.6	65.7	7.2	21.6	20.4	31		26.7	263.8		32.2	326.6		Peak Found	High	High	High	Peak Found	Not Found	Peak Found	Peak Found	Peak Found	Peak Found	Peak Found	Peak Found	Not Found	Peak Found	High	Not Found	Peak Found
	FALSE	High	[R].SSSVGSSSSYPISPAVSR.[T]	2xPhospho [S/Y]	Q15149 2xPhospho [S]	1	2	74	Q15149	Q15149 [4384-4401]	0	1914.79	0	43.6	253.3	768.7	2.3	332.9		164.6	48	0.4	9.5	2.1	86.4		35.5	3.3	3.2	46.1			Peak Found	High	High	High	High	Not Found	High	High	Peak Found	High	Peak Found	High	Not Found	High	Peak Found	Peak Found	High
	FALSE	High	[R].SSSVGSSSSYPISPAVSR.[T]	1xPhospho [S/Y]	Q15149 1xPhospho [S]	1	2	145	Q15149	Q15149 [4384-4401]	0	1834.82	0	71.9	468.1	329.6	1.8	322.1		204.7	17.9	0.6	20.9	23.2	67.3	0.8	157.9	4.3	5.6	103.1	0.2		High	High	High	High	High	Not Found	High	High	High	High	Peak Found	High	High	High	High	Peak Found	High
	FALSE	High	[R].SSSVGSSSSYPISPAVSR.[T]			1	2	4	Q15149	Q15149 [4384-4401]	0	1754.86	0				357.9			383.5	234.1	138.6	18.2		44.8			142.4		309.5	171		Not Found	Not Found	Not Found	High	Not Found	Not Found	Peak Found	Peak Found	Peak Found	Peak Found	Not Found	Peak Found	Not Found	Not Found	Peak Found	Not Found	Peak Found
	FALSE	High	[K].SLAAEEEAAR.[Q]			1	1	10	Q15149	Q15149 [2130-2139]	0	1046.51	0		326	291.1	155.2			7.1	20.6		54.9		11	63.5	169.2	420.1		85.9	195.5		Not Found	High	Peak Found	Peak Found	Not Found	Not Found	Peak Found	Peak Found	Not Found	Peak Found	Not Found	Peak Found	High	Peak Found	High	Not Found	High
	FALSE	High	[K].SLAQAEAEKQKEEAER.[E]			1	1	8	Q15149	Q15149 [1793-1808]	2	1816.9	0						312.4	868.6	619.1												Not Found	Not Found	Not Found	High	Not Found	High	Peak Found	Peak Found	Not Found	Not Found	Not Found	Not Found	High	Not Found	High	Not Found	Not Found
	FALSE	High	[R].SLESLHSFVAAATK.[E]			1	3	6	Q15149	Q15149 [751-764]	0	1460.77	0			29.5	1104.8		2.2	143.1	106.1	27			111.4	168.1	2.7	34.9		68.6	1.7		Not Found	Not Found	Peak Found	High	Not Found	Peak Found	High	High	Peak Found	Not Found	Not Found	Peak Found	High	Peak Found	Peak Found	Not Found	Peak Found
	FALSE	High	[K].SLLAWQSLR.[R]			1	2	2	Q15149	Q15149 [1029-1037]	0	1073.61	0				1394.8			34.6	32.1	116.4			54.2	168							Not Found	Not Found	Not Found	Peak Found	Not Found	Not Found	Peak Found	Peak Found	High	Not Found	Not Found	Peak Found	Peak Found	Not Found	Not Found	Not Found	Not Found
	FALSE	High	[R].SKEQAELEAAR.[Q]			1	1	8	Q15149	Q15149 [2098-2108]	1	1231.63	0		317.2	367.5	460.1					23.2	24.9	88.4	133.2	94	115.1	59.8		116.6			Not Found	High	High	High	Not Found	Not Found	Not Found	Not Found	Peak Found	Peak Found	Peak Found	Peak Found	High	Peak Found	Peak Found	Not Found	Peak Found
	FALSE	High	[R].SKGIYQSLEGAVQAGQLK.[V]			1	3	2	Q15149	Q15149 [476-493]	1	1877.01	0				680.2			89.1					425.5	342.8	262.4						Not Found	Not Found	Not Found	Peak Found	Not Found	Not Found	Peak Found	Not Found	Not Found	Not Found	Not Found	Peak Found	High	Peak Found	Not Found	Not Found	Not Found
	FALSE	High	[K].SHRVPLDVACAR.[G]	1xCarbamidomethyl [C10]		1	2	3	Q15149	Q15149 [3286-3297]	1	1380.72	0		53.2		701.7	47.1	90	123.3	78.8		70.1		75.7	302.5	130.7	101.7			25.4		Not Found	Peak Found	Not Found	Peak Found	Peak Found	High	Peak Found	Peak Found	Not Found	Peak Found	Not Found	Peak Found	High	Peak Found	Peak Found	Not Found	Not Found
	FALSE	High	[R].SMVEEGTGLR.[L]	1xOxidation [M2]		1	2	8	Q15149	Q15149 [4590-4599]	0	1094.51	0		181.9	384.6				595.7	447.9				138.2					51.7			Not Found	High	High	Not Found	Not Found	Not Found	High	High	Not Found	Not Found	Not Found	High	Not Found	Not Found	Not Found	Not Found	High
	FALSE	High	[R].SLVPAAELLESR.[V]			1	2	16	Q15149	Q15149 [3116-3127]	0	1284.72	0						583.4		40				26.2			31.9		41.6	1076.9		Peak Found	Not Found	Peak Found	High	High	High	High	High	High	High	Peak Found	High	High	High	High	Not Found	Peak Found
	FALSE	High	[K].SIITYVSSLYDAMPR.[V]			1	3	4	Q15149	Q15149 [387-401]	0	1715.87	0	114.5			951.7					147				497.6				89.2			Peak Found	Not Found	Not Found	High	Not Found	Not Found	Not Found	Not Found	Peak Found	Not Found	Not Found	Not Found	High	Not Found	Not Found	Not Found	Peak Found
	FALSE	High	[R].SIQEELQQLR.[Q]	1xPhospho [S1]	Q15149 1xPhospho [S1554]	1	1	2	Q15149	Q15149 [1554-1563]	0	1323.63	0	33.3	1031.7	58			144.7	39.1			174.1	120.5	11.9	113.9					72.9		Peak Found	High	Peak Found	Not Found	Not Found	Peak Found	Peak Found	Not Found	Not Found	Peak Found	Peak Found	Peak Found	Peak Found	Not Found	Not Found	Not Found	Not Found
	FALSE	High	[R].SIQEELQQLR.[Q]			1	1	13	Q15149	Q15149 [1554-1563]	0	1243.66	0	59.2	346.9	290.1	262.4	26.5	15	77.1	57.5	74.1	95.7	2.7	70.6	66.8	79.2	119.6	62.2		94.4		Peak Found	High	High	High	Peak Found	Peak Found	High	High	Peak Found	High	Peak Found	High	Peak Found	High	Peak Found	Peak Found	Not Found
	FALSE	High	[R].SLQEEHVAVAQLREEAER.[R]			1	1	1	Q15149	Q15149 [1732-1749]	1	2094.06	0				855.7		133.1							597.6		213.6					Not Found	Not Found	Not Found	Peak Found	Not Found	Peak Found	Not Found	Not Found	Not Found	Not Found	Not Found	Not Found	High	Not Found	Peak Found	Not Found	Not Found
	FALSE	High	[R].SLQEEHVAVAQLR.[E]	1xPhospho [S1]	Q15149 1xPhospho [S1732]	1	1	9	Q15149	Q15149 [1732-1744]	0	1559.76	1	80	261	212.7	9.8	16.6	51.1	810.2	26.5	28.8	34.5	6.9	135.3	32.5	20.4	8.5	9.6	36.9	18.8		High	High	High	Peak Found	Peak Found	Peak Found	High	Peak Found	Peak Found	Peak Found	Peak Found	High	Peak Found	Peak Found	Peak Found	Peak Found	Peak Found
	FALSE	High	[R].SLQEEHVAVAQLR.[E]			1	1	18	Q15149	Q15149 [1732-1744]	0	1479.79	0		6.5	209.4	533.6	32.4	47.4	170.1	48.5	78	40.9		167	56.7	37.1	130.5		91.4	150.6		Not Found	Peak Found	High	High	Peak Found	High	High	High	Peak Found	High	Not Found	High	High	Peak Found	Peak Found	Not Found	High
	FALSE	High	[R].SLSAIYLEK.[L]			1	2	1	Q15149	Q15149 [1216-1224]	0	1023.57	0		11.1		470.3				25.1	69.5		730.5		170.7		9.9	173.2	10.9	128.7		Not Found	Peak Found	Not Found	High	Not Found	Not Found	Not Found	Peak Found	Peak Found	Not Found	Peak Found	Not Found	Peak Found	Not Found	Peak Found	Peak Found	Peak Found
	FALSE	High	[K].TPVEVPVGGFK.[G]			1	2	5	Q15149	Q15149 [3374-3384]	0	1129.63	0				1080.5			151.7	86.3	53.1	41.5			142.3		244.5					Not Found	Not Found	Not Found	Peak Found	Not Found	Not Found	Peak Found	High	High	Peak Found	Not Found	Not Found	High	Not Found	Peak Found	Not Found	Not Found
	FALSE	High	[R].TQLASWSDPTEETGPVAGILDTETLEK.[V]	1xPhospho [S/T]	Q15149 1xPhospho [T/S]	1	2	4	Q15149	Q15149 [4402-4428]	0	2968.37	0	119.4	172	165.4	5.3	317.2		48.8	7.7				570.3		108.7			285.3			Peak Found	Peak Found	Peak Found	Peak Found	High	Not Found	Peak Found	Peak Found	Not Found	Not Found	Not Found	Peak Found	Not Found	Peak Found	Not Found	Not Found	Peak Found
	FALSE	High	[R].TQLASWSDPTEETGPVAGILDTETLEK.[V]			1	2	4	Q15149	Q15149 [4402-4428]	0	2888.4	0		99.4		299.7			453.3	240		210.3		324.2	38.4	111.2	23.4					Not Found	Peak Found	Not Found	High	Not Found	Not Found	Peak Found	Peak Found	Not Found	Peak Found	Not Found	Peak Found	High	Peak Found	Peak Found	Not Found	Not Found
	FALSE	High	[K].TISLVIR.[G]			1	2	1	Q15149	Q15149 [1227-1233]	0	801.519	0	19.9		426.5	213.9	694.3		40.6	28.8	18	1.8	204.1		75.4		74.8		1.8			Peak Found	Not Found	Peak Found	High	Peak Found	Not Found	Peak Found	Peak Found	Peak Found	Peak Found	Peak Found	Not Found	Peak Found	Not Found	Peak Found	Not Found	Peak Found
	FALSE	High	[R].TLLQGSGCLAGIYLEDTKEK.[V]	1xCarbamidomethyl [C8]		1	2	2	Q15149	Q15149 [3486-3505]	1	2196.12	0				924.3	23.8		72.5	70.1		44.1		77.4	281.3	46.3	212.2		47.9			Not Found	Not Found	Not Found	High	Peak Found	Not Found	Peak Found	Peak Found	Not Found	Peak Found	Not Found	Peak Found	Peak Found	Peak Found	High	Not Found	Peak Found
	FALSE	High	[R].TLLQGSGCLAGIYLEDTK.[E]	1xCarbamidomethyl [C8]		1	2	3	Q15149	Q15149 [3486-3503]	0	1938.98	0		587.3		570.9			181.4	22.1		33		230.7	29.1				138.5	7		Not Found	High	Not Found	High	Not Found	Not Found	Peak Found	Peak Found	Not Found	Peak Found	Not Found	Peak Found	Peak Found	Not Found	Not Found	Not Found	Peak Found
	FALSE	High	[R].THYSELTTLTSQYIK.[F]			1	2	3	Q15149	Q15149 [1458-1472]	0	1784.91	0									297.8	99.4			587.1					815.7		Not Found	Not Found	Not Found	Not Found	Not Found	Not Found	Not Found	Not Found	Peak Found	Peak Found	Not Found	Not Found	High	Not Found	Not Found	Not Found	Not Found
	FALSE	High	[K].EAQAVPATLPELEATK.[A]			1	2	7	Q15149	Q15149 [1251-1266]	0	1667.89	0			398	376.6	136.1		155.4	78.3	37.1	15.4		96	37.5	48.5	119.2		87.1	214.8		Not Found	Not Found	Peak Found	High	Peak Found	Not Found	Peak Found	Peak Found	High	Peak Found	Not Found	Peak Found	High	Peak Found	Peak Found	Not Found	Peak Found
	FALSE	High	[R].ELAEQELEK.[Q]			1	1	3	Q15149	Q15149 [1825-1833]	0	1088.55	0			176.6	404.4	112.5		96.8	106.2	30.4	50		57.7	13.1		549.9		7.4	195.1		Not Found	Not Found	Peak Found	High	Peak Found	Not Found	Peak Found	Peak Found	Peak Found	Peak Found	Not Found	Peak Found	Peak Found	Not Found	Peak Found	Not Found	Peak Found
	FALSE	High	[R].ELEQLGR.[Q]			1	2	4	Q15149	Q15149 [1338-1344]	0	844.452	1		598.8	311.3		138.8		204.1	111.5		33.4		185.2		61.4			155.5			Not Found	Peak Found	High	Not Found	High	Not Found	Peak Found	Peak Found	Not Found	Peak Found	Not Found	High	Not Found	High	Not Found	Not Found	Peak Found
	FALSE	High	[R].EGLTSIEEVTK.[N]			1	2	12	Q15149	Q15149 [4050-4060]	0	1205.63	0		148.4	164.7	408.9	95.7	50.5	59.9	38.9	45.7	14.8	16.3	26.9	141.6	35.2	240.2	31.6	51	229.7		Not Found	High	High	High	Peak Found	Peak Found	High	High	Peak Found	Peak Found	Peak Found	Peak Found	High	Peak Found	Peak Found	Peak Found	High
	FALSE	High	[K].EGVVGPELHHK.[L]			1	2	1	Q15149	Q15149 [2893-2903]	0	1201.63	0								341.9					721.7		567.2			169.1		Not Found	Not Found	Not Found	Not Found	Not Found	Not Found	Not Found	Peak Found	Not Found	Not Found	Not Found	Not Found	Peak Found	Not Found	High	Not Found	Not Found
	FALSE	High	[R].DSQDAGGFGPEDR.[L]			1	2	25	Q15149	Q15149 [1076-1088]	0	1350.56	0	34.9	248.3	160	183	77.1		112.3	51.1	8.9	47.2	248.7	74.9	45.9	120.8	204.6	11	86	85.5		Peak Found	High	High	High	Peak Found	Not Found	High	High	High	High	High	Peak Found	High	High	High	Peak Found	High
	FALSE	High	[R].DPYTGQSVSLFQALKK.[G]			1	2	5	Q15149	Q15149 [3244-3259]	1	1781.94	0				1186.8	86.3		108.1	133.1				129.2	91.5		60.4			4.6		Not Found	Not Found	Not Found	High	Peak Found	Not Found	Peak Found	Peak Found	Not Found	Not Found	Not Found	Peak Found	High	Not Found	Peak Found	Not Found	Not Found
	FALSE	High	[R].DPYTGQSVSLFQALK.[K]			1	2	4	Q15149	Q15149 [3244-3258]	0	1653.85	0		13.2	58	521.1	111.1		242.3	71.5	47.7	8.4	227.8	250.9	72.2	26.2			149.5			Not Found	Peak Found	Peak Found	Peak Found	Peak Found	Not Found	Peak Found	High	High	Peak Found	Peak Found	Peak Found	High	Peak Found	Not Found	Not Found	Peak Found
	FALSE	High	[K].DPYTGQQISLFQAMQK.[G]			1	2	2	Q15149	Q15149 [2916-2931]	0	1854.91	0				1724.4					75.6											Not Found	Not Found	Not Found	High	Not Found	Not Found	Not Found	Not Found	Peak Found	Not Found	Not Found	Not Found	Not Found	Not Found	Not Found	Not Found	Not Found
	FALSE	High	[R].DPYSGSTISLFQAMQK.[G]			1	2	2	Q15149	Q15149 [3575-3590]	0	1772.85	0				1580.3					39.3				180.4							Not Found	Not Found	Not Found	High	Not Found	Not Found	Not Found	Not Found	Peak Found	Not Found	Not Found	Not Found	Peak Found	Not Found	Not Found	Not Found	Not Found
	FALSE	High	[R].EALEAESAWCYLYGTGSVAGVYLPGSR.[Q]	1xCarbamidomethyl [C10]		1	2	1	Q15149	Q15149 [3812-3838]	0	2906.37	0					1474.8		325.2													Not Found	Not Found	Not Found	Not Found	High	Not Found	Peak Found	Not Found	Not Found	Not Found	Not Found	Not Found	Not Found	Not Found	Not Found	Not Found	Not Found
	FALSE	High	[R].EAIAELER.[E]			1	1	1	Q15149	Q15149 [2587-2594]	0	930.489	0																			No Quan Values	Not Found	Not Found	Peak Found	High	Peak Found	Not Found	Peak Found	Peak Found	Peak Found	Peak Found	Not Found	Not Found	Not Found	Not Found	Peak Found	Not Found	Peak Found
	FALSE	High	[R].DVAEVDTVR.[R]			1	2	2	Q15149	Q15149 [3146-3154]	0	1003.51	0	577	241.6	390.8	74.6	155.6		127.8	50.6					111.8		70.3					Peak Found	Peak Found	High	Peak Found	High	Not Found	Peak Found	Peak Found	Not Found	Not Found	Not Found	Not Found	Peak Found	Not Found	Peak Found	Not Found	Not Found
	FALSE	High	[R].DVAEVDTVRR.[A]			1	2	3	Q15149	Q15149 [3146-3155]	1	1159.61	0		176.6	297.8		122.6		335.3	240.7	23	38		185.5	22.8	21.7	167.6		168.5			Not Found	Peak Found	High	Not Found	High	Not Found	Peak Found	Peak Found	Peak Found	High	Not Found	Peak Found	Peak Found	Peak Found	Peak Found	Not Found	Peak Found
	FALSE	High	[K].DTHDQLSEPSEVR.[S]			1	2	39	Q15149	Q15149 [3969-3981]	0	1512.69	0		146.7	181.2	453.9	69.7	2.9	139.1	54.5	30.8	31.8	58.6	31	32.8	94.7	213.6	3.6	71.7	183.5		Not Found	High	High	High	High	High	High	High	High	High	Peak Found	Peak Found	High	High	High	Peak Found	High
	FALSE	High	[K].FAEQTLR.[Q]			1	1	6	Q15149	Q15149 [2310-2316]	0	864.457	0		389.6	409.3		140.5		238.5	160		78.9		292.4					90.7			Not Found	Peak Found	High	Not Found	Peak Found	Not Found	High	High	Not Found	Peak Found	Not Found	High	Not Found	Not Found	Not Found	Not Found	Peak Found
	FALSE	High	[R].EYGSCSHHYQQLLQSLEQGAQEESR.[C]	1xCarbamidomethyl [C5]		1	2	2	Q15149	Q15149 [1094-1118]	0	2964.32	0				1800																Not Found	Not Found	Not Found	High	Not Found	Not Found	Not Found	Not Found	Not Found	Not Found	Not Found	Not Found	Not Found	Not Found	Not Found	Not Found	Not Found
	FALSE	High	[K].FKEMELPAK.[E]			1	3	2	Q15149	Q15149 [461-469]	1	1092.58	0																			No Quan Values	Not Found	Not Found	Peak Found	High	Not Found	Not Found	Not Found	Not Found	Not Found	Not Found	Not Found	Not Found	Not Found	Not Found	Not Found	Not Found	Not Found
	FALSE	High	[R].FLEVQYLTGGLIEPDTPGRVPLDEALQR.[G]			1	2	7	Q15149	Q15149 [4524-4551]	1	3126.65	0		60.2		77.8				36.5	11	508.3		64.2	895.3		146.7					Not Found	Peak Found	Not Found	High	Not Found	Not Found	Not Found	Peak Found	Peak Found	High	Not Found	Peak Found	High	Not Found	Peak Found	Not Found	Not Found
	FALSE	High	[R].FLEVQYLTGGLIEPDTPGR.[V]			1	2	20	Q15149	Q15149 [4524-4542]	0	2105.09	0		47.2	122.9	216.7	95.9	15.4	241.8	132.1		52.5		268.2	81.2	127.2	115.3		221.6	62.2		Not Found	High	Peak Found	High	High	Peak Found	High	High	Peak Found	High	Not Found	High	High	Peak Found	High	Not Found	High
	FALSE	High	[K].FLEGTSCIAGVFVDATK.[E]	1xCarbamidomethyl [C7]		1	2	10	Q15149	Q15149 [4065-4081]	0	1814.9	0		177.1	211.4	203.7	209.5	2.6	132.7	87.3	12.5	27.9		213	97.5	150.7	125.8	35.1	112.4	0.8		Not Found	High	High	High	Peak Found	Peak Found	High	Peak Found	Peak Found	Peak Found	Not Found	Peak Found	High	Peak Found	Peak Found	Peak Found	Peak Found
	FALSE	High	[R].ELYQQLQR.[G]			1	2	7	Q15149	Q15149 [3132-3139]	0	1077.57	0		182.8	115.4	454.2	46.2	19.1	132.5	50.2	63.9	29.6		77.6	47.2	27	175.9		110.3	268.1		Not Found	High	Peak Found	Peak Found	Peak Found	Peak Found	Peak Found	Peak Found	Peak Found	Peak Found	Not Found	Peak Found	High	Peak Found	High	Not Found	Peak Found
	FALSE	High	[K].EMSVYEAYR.[K]			1	2	1	Q15149	Q15149 [4288-4296]	0	1147.51	0				52.8		44.5	22.5				924.4		123.4	79.5	126.1			426.7		Not Found	Not Found	Not Found	Peak Found	Not Found	Peak Found	Peak Found	Not Found	Not Found	Not Found	Peak Found	Not Found	Peak Found	Peak Found	Peak Found	Not Found	Not Found
	FALSE	High	[K].ELIPTEEALR.[L]			1	2	11	Q15149	Q15149 [3926-3935]	0	1170.64	2		124.4	186.6	598.8	49.5	16.9	65.9	47.2	51.2	22.6		54	158.3	37.6	322.1		40.9	24		Not Found	High	Peak Found	High	High	High	High	High	High	Peak Found	Not Found	High	High	Peak Found	Peak Found	Peak Found	Peak Found
	FALSE	High	[K].ESYSALMR.[E]			1	2	2	Q15149	Q15149 [793-800]	0	956.451	0	1730.3			54.3					3.7				4.4		5.3		2			Peak Found	Not Found	Not Found	High	Not Found	Not Found	Not Found	Not Found	Peak Found	Not Found	Not Found	Not Found	Peak Found	Not Found	Peak Found	Not Found	Peak Found
	FALSE	High	[R].EQLQLLEEQHR.[A]			1	2	11	Q15149	Q15149 [2733-2743]	0	1422.73	1		29.7		544.9	7.5	90.6	215.7	62.9	70	47.5	11.3	92.5	99.9	3.8	350.8	10.4	59.1	103.5		Not Found	Peak Found	Not Found	High	Peak Found	High	High	Peak Found	Peak Found	High	Peak Found	Peak Found	High	Peak Found	Peak Found	Peak Found	Peak Found
	FALSE	High	[R].EQLRQEQALLEEIER.[H]			1	2	7	Q15149	Q15149 [1383-1397]	1	1883.98	0			13.3	281	25.7		310.7	74.4	7.3	14.5		163.3	83.2		197.9		628.6			Not Found	Not Found	Peak Found	High	Peak Found	Not Found	High	High	Peak Found	Peak Found	Not Found	High	High	Not Found	Peak Found	Not Found	Peak Found
	FALSE	High	[K].EQELQQTLQQEQSVLDQLRGEAEAAR.[R]			1	1	4	Q15149	Q15149 [2199-2224]	1	2997.49	0				545.6		47.5	203.2	93.3		49.5		332.1	280.8		147.9		100.1			Not Found	Not Found	Not Found	High	Not Found	Peak Found	Peak Found	Peak Found	Not Found	Peak Found	Not Found	Peak Found	High	Not Found	Peak Found	Not Found	Peak Found
	FALSE	High	[K].EQELQQTLQQEQSVLDQLR.[G]			1	1	15	Q15149	Q15149 [2199-2217]	0	2313.17	0			209.3	116	11.9		282.4	81.9		23		295.7	21.6	204.7	123.5		198.1	232		Not Found	Not Found	Peak Found	High	Peak Found	Not Found	Peak Found	High	Not Found	High	Not Found	High	High	Peak Found	High	Not Found	High
	FALSE	High	[R].ESADPLGAWLQDAR.[R]			1	2	7	Q15149	Q15149 [1351-1364]	0	1528.74	0			145.2	440.3	128.5	71.8	194.4	110.5			84.1	217.9		64.3	135.1	28.5	108.7	70.7		Not Found	Not Found	High	High	Peak Found	Peak Found	High	High	Not Found	Not Found	Peak Found	Peak Found	Not Found	High	Peak Found	Peak Found	Peak Found
	FALSE	High	[R].ALQALEELR.[L]			1	1	8	Q15149	Q15149 [1671-1679]	0	1042.59	0		106.5		649.4	59.9		81.4	45.7	112.6	31.4	9.6	88.8	162.8		124.7		16.3	311		Not Found	Peak Found	Not Found	Peak Found	Peak Found	Not Found	High	High	High	Peak Found	Peak Found	Peak Found	High	Not Found	High	Not Found	Peak Found
	FALSE	High	[K].AKLEQLFQDEVAK.[A]			1	2	12	Q15149	Q15149 [2651-2663]	1	1518.82	0			167.6	646.9	61.1	36.2	175.2	94.2	8.2	18.4	33.9	130.4	180.5	34.9	121.2		63.8	27.4		Not Found	Peak Found	High	High	Peak Found	High	Peak Found	High	Peak Found	Peak Found	Peak Found	High	High	Peak Found	Peak Found	Not Found	Peak Found
	FALSE	High	[R].AHEEQLKEAQAVPATLPELEATK.[A]			1	2	2	Q15149	Q15149 [1244-1266]	1	2503.3	0																			No Quan Values	Not Found	Not Found	Not Found	High	Not Found	Not Found	Not Found	Not Found	Not Found	Not Found	Not Found	Not Found	Not Found	Not Found	Not Found	Not Found	Not Found
	FALSE	High	[R].APVPASELLASGVLSR.[A]			1	2	17	Q15149	Q15149 [3447-3462]	0	1566.88	1	25.6	261.6	114	419.9	138.4	63.8	129.4	59.3	40.4	19.7		118.9	128.5	8	70		115.1	87.5		Peak Found	High	High	High	High	High	Peak Found	Peak Found	Peak Found	High	Not Found	High	High	Peak Found	High	Not Found	High
	FALSE	High	[K].AQLEPVASPAK.[K]	1xPhospho [S8]	Q15149 1xPhospho [S1435]	1	2	1	Q15149	Q15149 [1428-1438]	0	1190.58	0	246.4		375.4	65.8	591		45.1		162.3	130.5	183.5									Peak Found	Not Found	Peak Found	Peak Found	High	Not Found	Peak Found	Not Found	Peak Found	Peak Found	Peak Found	Not Found	Not Found	Not Found	Not Found	Not Found	Not Found
	FALSE	High	[K].AQLEPVASPAK.[K]			1	2	12	Q15149	Q15149 [1428-1438]	0	1110.62	0		297.5	346.8	50.3	125.5	26.3	207.8	142.4		49.3		77.9		44.8	275.8		36.5	119.1		Not Found	High	High	Peak Found	High	Peak Found	High	Peak Found	Not Found	High	Not Found	Peak Found	Not Found	Peak Found	High	Not Found	Peak Found
	FALSE	High	[K].AQAEVEGLGK.[G]			1	2	9	Q15149	Q15149 [1166-1175]	0	1001.53	0		342.2	369.5	38.4	135.3	2.9	210	155.9	5.3	32.2	36.1	86.5		76.9	15.2	13.7	99.5	180.4		Not Found	Peak Found	High	High	High	Peak Found	High	Peak Found	Peak Found	High	Peak Found	Peak Found	Not Found	Peak Found	Peak Found	Peak Found	Peak Found
	FALSE	High	[R].AQAEAQQPTFDALRDELR.[G]			1	2	16	Q15149	Q15149 [1274-1291]	1	2059.02	0	22.7	115.6	104	390	49.1	30.7	141.8	92	153.5	60.9		124.3	104.2	39.4	193.8		96	82.1		Peak Found	High	High	High	Peak Found	Peak Found	High	High	Peak Found	High	Not Found	High	High	Peak Found	Peak Found	Not Found	High
	FALSE	High	[R].AQFEQLKDGK.[T]			1	2	2	Q15149	Q15149 [3463-3472]	1	1163.61	0		115.4	270.6		134.4		262.8	437		34.6		393.3					152			Not Found	Peak Found	Peak Found	Not Found	Peak Found	Not Found	High	High	Not Found	Peak Found	Not Found	Peak Found	Not Found	Not Found	Not Found	Not Found	Peak Found
	FALSE	High	[R].ANELQLR.[W]			1	3	2	Q15149	Q15149 [411-417]	0	843.468	0		28	18		42.5		39.6	24.2		7.1	1357.9	22.6		136.7		87.1	36.2			Not Found	High	Peak Found	Not Found	Peak Found	Not Found	Peak Found	Peak Found	Not Found	Peak Found	Peak Found	Peak Found	Not Found	Peak Found	Not Found	Peak Found	Peak Found
	FALSE	High	[R].AALAHSEEVTASQVAATK.[T]			1	2	27	Q15149	Q15149 [2744-2761]	0	1783.92	0	8.2	143.4	188.1	213.9	91.9	26	149.5	22.3	18.5	113.2	38.8	186.6	157.4	43.2	169.3	8.2	95.2	126.3		Peak Found	High	High	High	Peak Found	High	High	High	Peak Found	Peak Found	Peak Found	High	High	Peak Found	Peak Found	Peak Found	Peak Found
	FALSE	High	[K].AALEEVER.[L]			1	1	2	Q15149	Q15149 [2143-2150]	0	916.473	1		423.9	487.8		161.3	4.4	95.9			57.4		23.5		91.1	304.6	10.3	126.8	12.9		Not Found	High	Peak Found	Not Found	Peak Found	Peak Found	Peak Found	Not Found	Not Found	Peak Found	Not Found	Peak Found	Not Found	Peak Found	Peak Found	Peak Found	Peak Found
	FALSE	High	[R].AGEVERDLDKADSMIR.[L]			1	3	1	Q15149	Q15149 [572-587]	2	1804.89	0																			No Quan Values	Not Found	Not Found	Not Found	High	Not Found	Not Found	Not Found	Not Found	Not Found	Not Found	Not Found	Not Found	Not Found	Not Found	Not Found	Not Found	Not Found
	FALSE	High	[K].AGVVGPELHEQLLSAEK.[A]			1	2	9	Q15149	Q15149 [3552-3568]	0	1776.95	0	15.9		112.3	654.6	67.6		122.1	71.1	41	27.5	26.4	91.9	141	64.4	289.5		74.7			Peak Found	Not Found	Peak Found	High	Peak Found	High	High	High	Peak Found	Peak Found	Peak Found	Peak Found	High	Peak Found	High	Not Found	High
	FALSE	High	[K].AGVAAPATQVAQVTLQSVQR.[R]			1	3	8	Q15149	Q15149 [631-650]	0	1995.1	0			538.8	382	239.9		304.4	134.6	25.6	28.4		69.2	32		45.2					Not Found	Not Found	Peak Found	High	High	Not Found	High	High	Peak Found	Peak Found	Not Found	Peak Found	Peak Found	Not Found	Peak Found	Not Found	Not Found
	FALSE	High	[R].AGTLSITEFADMLSGNAGGFR.[S]			1	2	4	Q15149	Q15149 [4361-4381]	0	2115.02	0				1429.6									370.4							Not Found	Not Found	Not Found	High	Not Found	Not Found	Not Found	Not Found	Not Found	Not Found	Not Found	Not Found	High	Not Found	Not Found	Not Found	Not Found
	FALSE	High	[R].AGLVGPEFHEK.[L]			1	2	10	Q15149	Q15149 [3221-3231]	0	1183.61	1		55.4	184.6	540	62.3	3.5	208	154.3		29.5	5.8	159.1	9.8	25.2	205.3	1.3	21.2	134.7		Not Found	Peak Found	High	High	Peak Found	Peak Found	High	High	Not Found	Peak Found	Peak Found	High	Peak Found	Peak Found	Peak Found	Peak Found	Peak Found
	FALSE	High	[K].AELELELGR.[I]			1	1	5	Q15149	Q15149 [2079-2087]	0	1029.56	0	227.7	45.7	163.1	190.9	135.3	28.1	93.3	59	13.9	37.9	154.4		28.6	48.1	395.2		16.6	162.2		Peak Found	Peak Found	Peak Found	High	Peak Found	Peak Found	Peak Found	High	Peak Found	High	Peak Found	Not Found	Peak Found	Peak Found	High	Not Found	Peak Found
	FALSE	High	[R].AEMEVLLASK.[A]	1xOxidation [M3]		1	1	1	Q15149	Q15149 [1899-1908]	0	1106.58	0			375.2	79.9			403.7	227.1	248.9	20.3		199.9		15	152		77.9			Not Found	Not Found	High	Peak Found	Not Found	Not Found	Peak Found	Peak Found	Peak Found	Peak Found	Not Found	Peak Found	Not Found	Peak Found	Peak Found	Not Found	Peak Found
	FALSE	High	[K].AFCGFEDPR.[T]	1xCarbamidomethyl [C3]		1	2	1	Q15149	Q15149 [4492-4500]	0	1098.47	0						245.2												1554.8		Not Found	Not Found	Not Found	Not Found	Not Found	Peak Found	Not Found	Not Found	Not Found	Not Found	Not Found	Not Found	Not Found	Not Found	Not Found	Not Found	Not Found
	FALSE	High	[K].AEVVETTQVYTEEETRR.[A]			1	2	5	Q15149	Q15149 [3686-3702]	1	2039.99	0		137	88.3	107.2	45.4	15.6	389.5	123.5		77.2		448.2	31.4	182.8			107.5	46.4		Not Found	High	Peak Found	High	Peak Found	Peak Found	Peak Found	Peak Found	Not Found	Peak Found	Not Found	Peak Found	Peak Found	High	Not Found	Not Found	Peak Found
	FALSE	High	[K].AEVVETTQVYTEEETR.[R]			1	2	10	Q15149	Q15149 [3686-3701]	0	1883.89	0	38.1	441.2	349.9		139.6		280.3	57.8		22.7	15	35.8		263.2		4.4	152			Peak Found	High	High	Not Found	Peak Found	Not Found	High	High	Not Found	Peak Found	Peak Found	Peak Found	Not Found	Peak Found	Not Found	Peak Found	High
	FALSE	High	[R].DGHNLISLLEVLSGDSLPR.[E]			1	5	22	Q15149	Q15149 [209-227]	0	2035.08	0		51.4		135.9	34.4	110.9	254.4	103.2	31.1	188.6		249.4	232.7	243.4	22.2		138.9	3.5		Not Found	Peak Found	Not Found	High	Peak Found	High	High	High	High	High	Not Found	High	High	Peak Found	Peak Found	Not Found	High
	FALSE	High	[R].DALDGPAAEAEPEHSFDGLRR.[K]			1	2	2	Q15149	Q15149 [2768-2788]	1	2253.05	0				1441.9								54.7	218.2					85.2		Not Found	Not Found	Not Found	High	Not Found	Not Found	Not Found	Not Found	Not Found	Not Found	Not Found	Peak Found	Peak Found	Not Found	Not Found	Not Found	Not Found
	FALSE	High	[R].DALDGPAAEAEPEHSFDGLR.[R]			1	2	12	Q15149	Q15149 [2768-2787]	0	2096.95	0				692.5		47.4	264.3	95.6		8.3		254.7	104.5	75.2			37.4	220.1		Not Found	Not Found	Not Found	High	Not Found	High	High	Peak Found	Not Found	Peak Found	Not Found	Peak Found	High	Peak Found	Not Found	Not Found	Peak Found
	FALSE	High	[R].DDGTGQLLLPLSDAR.[K]			1	2	22	Q15149	Q15149 [4004-4018]	0	1570.81	0		282.7	144.8	186.1	157.3	16.7	102.8	72.1	49.1	26.9	255.3	98	57.6	139.3	104.2		75.6	31.8		Not Found	High	High	High	High	High	High	High	High	High	High	High	High	High	High	Not Found	High
	FALSE	High	[K].DLLPSDMAVALLEAQAGTGHIIDPATSAR.[L]	1xOxidation [M7]		1	2	1	Q15149	Q15149 [3184-3212]	0	2949.5	0		93.9		16.4		3.3	653.5	386.3				504.2			94.2		48.2			Not Found	Peak Found	Not Found	Peak Found	Not Found	Peak Found	High	Peak Found	Not Found	Not Found	Not Found	Peak Found	Not Found	Not Found	Peak Found	Not Found	Peak Found
	FALSE	High	[K].DLLPSDMAVALLEAQAGTGHIIDPATSAR.[L]			1	2	6	Q15149	Q15149 [3184-3212]	0	2933.5	0			172.4	1214									413.6							Not Found	Not Found	Peak Found	High	Not Found	Not Found	Not Found	Not Found	Not Found	Not Found	Not Found	Not Found	High	Not Found	Not Found	Not Found	Not Found
	FALSE	High	[K].DLSELGSVR.[T]			1	2	7	Q15149	Q15149 [3477-3485]	0	975.511	0		75.6		731.7		19.3	18.7	53.3	11.4	44.6	45.7	62.9	125.6		532.9		52.1	26.1		Not Found	Peak Found	Peak Found	High	Not Found	Peak Found	Peak Found	Peak Found	Peak Found	Peak Found	Peak Found	Peak Found	High	Not Found	High	Not Found	Peak Found
	FALSE	High	[R].DLDKADSMIR.[L]			1	3	2	Q15149	Q15149 [578-587]	1	1163.57	0	30.6	54.2		959.9	151.5		6.6	8.6	70.3		184.9		66.9	10.7	95.7	134.6	9.4	16.1		Peak Found	Peak Found	Not Found	High	Peak Found	Not Found	Peak Found	Peak Found	Peak Found	Not Found	Peak Found	Not Found	Peak Found	Peak Found	Peak Found	Peak Found	Peak Found
	FALSE	High	[R].ATTAALLLEAQAATGFLVDPVR.[N]			1	2	26	Q15149	Q15149 [3519-3540]	0	2228.23	0		110.5	68.1	42.6	262.1		177.9	70.7			76.2	407	22	293	30.1	113.5	100.5	25.8		Not Found	High	Peak Found	High	High	Not Found	High	High	Not Found	Not Found	Peak Found	High	High	High	High	High	High
	FALSE	High	[K].ATVSAPFGK.[F]			1	2	2	Q15149	Q15149 [3045-3053]	0	877.478	0			244.7	84	120.5		196.6	181.5	14	65.8	51.5	108.1	25.7	140.5	329.8	46		191.1		Not Found	Not Found	Peak Found	Peak Found	Peak Found	Not Found	Peak Found	Peak Found	Peak Found	Peak Found	Peak Found	Peak Found	Peak Found	Peak Found	High	Peak Found	Not Found
	FALSE	High	[R].ARSDEGQLSPATR.[G]	1xPhospho [S9]	Q15149 1xPhospho [S720]	1	3	3	Q15149	Q15149 [712-724]	1	1467.66	0	719.5	62.9	323.4		305.6		141.5							109.5		84.5		53.1		Peak Found	Peak Found	High	Not Found	High	Not Found	Peak Found	Not Found	Not Found	Not Found	Not Found	Not Found	Not Found	Peak Found	Not Found	Peak Found	Not Found
	FALSE	High	[K].AQVEQELTTLR.[L]			1	1	13	Q15149	Q15149 [2319-2329]	0	1287.69	0	2.5	249.4		501.4	132.3	88.8	34.4	18.7	60.7	13		56.8	288.1	32.3	170.8	42.6	15.3	93		Peak Found	High	Not Found	High	Peak Found	High	High	Peak Found	Peak Found	Peak Found	Not Found	High	High	Peak Found	High	Peak Found	Peak Found
	FALSE	High	[R].ARQEELYSELQAR.[E]			1	2	7	Q15149	Q15149 [3356-3368]	1	1592.8	0			37.3			56.4	364	294.9		59.5	25.6	275.6	392.7		294.1					Not Found	Not Found	Peak Found	Not Found	Not Found	High	High	Peak Found	Not Found	Peak Found	Peak Found	High	High	Not Found	Peak Found	Not Found	Not Found
	FALSE	High	[R].AREEAERELER.[W]			1	1	1	Q15149	Q15149 [1760-1770]	2	1387.69	0				217.5	46.8	74.5	254.2	74.2			852.9	66.4	111.5		45.4		56.8			Not Found	Not Found	Not Found	Peak Found	Peak Found	Peak Found	High	Peak Found	Not Found	Not Found	Peak Found	Peak Found	Peak Found	Not Found	Peak Found	Not Found	Peak Found
	FALSE	High	[R].CITDPQTGLCLLPLK.[E]	2xCarbamidomethyl [C1; C10]		1	2	2	Q15149	Q15149 [4245-4259]	0	1728.9	0			760.4	305.9			24.1				65.7	242.3	219.2			35.8	62.2	84.4		Not Found	Not Found	Peak Found	Peak Found	Not Found	Not Found	Peak Found	Not Found	Not Found	Not Found	Peak Found	Peak Found	High	Not Found	Not Found	Peak Found	Peak Found
	FALSE	High	[R].CDNFTSSWR.[D]	1xCarbamidomethyl [C1]		1	4	4	Q15149	Q15149 [317-325]	0	1172.48	0				1436.1	11.2				45.1	31.1			262.4		14.1					Not Found	Not Found	Not Found	High	Peak Found	Not Found	Not Found	Not Found	Peak Found	Peak Found	Not Found	Not Found	High	Not Found	Peak Found	Not Found	Not Found
	FALSE	High	[R].CVEDPETGLR.[L]	1xCarbamidomethyl [C1]		1	2	9	Q15149	Q15149 [3667-3676]	0	1175.54	0			407.7	341.3	65.1	27.2	112.1	64.1		36.3	139.4	50.7	37.2		326.8	148.1	44			Not Found	Not Found	Peak Found	High	Peak Found	Peak Found	High	High	Not Found	Peak Found	Peak Found	Peak Found	High	Not Found	High	Peak Found	Peak Found
	FALSE	High	[R].CRPDQLTGLSLLPLSEK.[A]	1xCarbamidomethyl [C1]		1	2	6	Q15149	Q15149 [3336-3352]	0	1927.03	0				550.6	357.7		214	224				111.5	87.8		254.3					Not Found	Not Found	Not Found	High	Peak Found	Not Found	High	Peak Found	Not Found	Not Found	Not Found	Peak Found	High	Not Found	Peak Found	Not Found	Not Found
	FALSE	High	[K].AVTGYRDPYTGQSVSLFQALK.[K]			1	2	2	Q15149	Q15149 [3238-3258]	1	2301.19	0				1800																Not Found	Not Found	Not Found	High	Not Found	Not Found	Not Found	Not Found	Not Found	Not Found	Not Found	Not Found	Not Found	Not Found	Not Found	Not Found	Not Found
	FALSE	High	[R].AVTGYRDPYTEQTISLFQAMK.[K]			1	2	6	Q15149	Q15149 [3904-3924]	1	2419.2	0				907.9					17.2	12.4			392.1	227.1	19.7		223.5			Not Found	Not Found	Not Found	High	Not Found	Not Found	Not Found	Not Found	Peak Found	Peak Found	Not Found	Not Found	High	Peak Found	Peak Found	Not Found	Peak Found
	FALSE	High	[R].AVTGYKDPYTGQQISLFQAMQK.[G]			1	2	4	Q15149	Q15149 [2910-2931]	1	2474.24	0	962.8			837.2																Peak Found	Not Found	Not Found	High	Not Found	Not Found	Not Found	Not Found	Not Found	Not Found	Not Found	Not Found	Not Found	Not Found	Not Found	Not Found	Not Found
	FALSE	High	[R].AVTGYKDPYSGK.[L]			1	2	4	Q15149	Q15149 [4147-4158]	1	1285.64	0		23.6	71.4	446.5	26.5	84.7	198.8	214.2		78.9		183.9	6	9.2	98.8		14	343.4		Not Found	Peak Found	Peak Found	High	Peak Found	Peak Found	Peak Found	High	Not Found	Peak Found	Not Found	Peak Found	Peak Found	Peak Found	Peak Found	Not Found	Peak Found
	FALSE	High	[K].AYSDPSTGEPATYGELQQR.[C]			1	2	11	Q15149	Q15149 [3317-3335]	0	2069.94	0		297.3	274.9	265			260.5	172.4		73.2		9.4	56.6	68.8	108.5	14.4	127.1	71.9		Not Found	High	High	High	Not Found	Not Found	Peak Found	Peak Found	Not Found	Peak Found	Not Found	Peak Found	High	Peak Found	High	Peak Found	Peak Found
	FALSE	High	[R].LCFEGLR.[S]	1xCarbamidomethyl [C2]		1	2	4	Q15149	Q15149 [3109-3115]	0	894.45	0				878.7		6.2			115.3				518.3		3.2			278.3		Not Found	Not Found	Not Found	High	Not Found	Peak Found	Not Found	Not Found	High	Not Found	Not Found	Not Found	High	Not Found	Peak Found	Not Found	Not Found
	FALSE	High	[R].LAEVEAALEK.[Q]			1	1	10	Q15149	Q15149 [1499-1508]	0	1072.59	0		456	219.8	404.9	57.5		66.1	44.1	28.2	24.6	12.4	42.2	91.1		275.5	9.2	41.9	26.5		Not Found	High	High	Peak Found	High	Not Found	Peak Found	Peak Found	Peak Found	Peak Found	Peak Found	High	High	Not Found	High	Peak Found	Peak Found
	FALSE	High	[R].LAQGHTTVDELAR.[R]			1	2	23	Q15149	Q15149 [2809-2821]	0	1410.73	0	8.3	142.7	155.6	501.2	45.1	56.2	122.5	103.3	32.3	36.4		125	60.5	5	88.1	18.5	30.4	269		Peak Found	High	High	High	High	High	High	High	High	Peak Found	Not Found	High	High	Peak Found	Peak Found	Peak Found	Peak Found
	FALSE	High	[R].LEDLLQDAQDEKEQLNEYK.[G]			1	2	4	Q15149	Q15149 [897-915]	1	2321.11	0		163.3	112.7	393.5	181.1		229.4	89.9	20.6	9.9	16.8	224.9	78.8	85.1	84.6	19.9	89.5			Not Found	Peak Found	Peak Found	High	Peak Found	Not Found	Peak Found	Peak Found	Peak Found	Peak Found	Peak Found	Peak Found	High	Peak Found	Peak Found	Peak Found	Peak Found
	FALSE	High	[R].LEDLLQDAQDEK.[E]			1	2	2	Q15149	Q15149 [897-908]	0	1416.69	0			395.6	376.4		494.1	61.3	16.6		12	139.2	7.7	41.6	63.9	85.7	63.5	42.3			Not Found	Not Found	Peak Found	High	Not Found	Peak Found	Peak Found	Peak Found	Not Found	Peak Found	Peak Found	Peak Found	Peak Found	Peak Found	Peak Found	Peak Found	Peak Found
	FALSE	High	[R].LDLQYAK.[L]			1	3	4	Q15149	Q15149 [734-740]	0	850.467	0		116.2	36.5	645.5	72.1		106.6	80.7	16.8	33.6		90.7	5.6	17.7	220.7		31.5	325.7		Not Found	High	Peak Found	High	Peak Found	Not Found	Peak Found	Peak Found	Peak Found	Peak Found	Not Found	Peak Found	Peak Found	Peak Found	High	Not Found	Peak Found
	FALSE	High	[K].KGWLYYEAGQR.[F]			1	2	4	Q15149	Q15149 [4513-4523]	1	1370.69	0				1215.9									584.1							Not Found	Not Found	Not Found	High	Not Found	Not Found	Not Found	Not Found	Not Found	Not Found	Not Found	Not Found	High	Not Found	Not Found	Not Found	Not Found
	FALSE	High	[R].LAEDEAFQR.[R]			1	1	6	Q15149	Q15149 [2006-2014]	0	1078.52	0			175	877.3	73.6		100.3	57.5	53.2	33.3		89.6	45.8	18	224.4		39.6	12.4		Not Found	Not Found	Peak Found	High	Peak Found	Not Found	Peak Found	Peak Found	High	Peak Found	Not Found	Peak Found	Peak Found	Peak Found	High	Not Found	Peak Found
	FALSE	High	[R].LAAEQELIR.[L]			1	1	11	Q15149	Q15149 [1846-1854]	0	1042.59	1		171.3	316.7	348.4	77.7	74.4	101.6	80	40.4	42.5	2.1	78.8	99.8	13.1	125.9		29.4	197.9		Not Found	High	High	Peak Found	Peak Found	Peak Found	High	Peak Found	Peak Found	Peak Found	Peak Found	High	High	Peak Found	Peak Found	Not Found	Peak Found
	FALSE	High	[K].LAAIGEATR.[L]			1	1	6	Q15149	Q15149 [1976-1984]	0	901.51	0	94.3	1540.4								55.1					59.1			51.1		Peak Found	High	High	Peak Found	High	Not Found	Peak Found	Peak Found	Peak Found	Peak Found	Not Found	Not Found	Peak Found	Peak Found	Peak Found	Not Found	Peak Found
	FALSE	High	[R].KQEELQQLEQQR.[R]			1	2	8	Q15149	Q15149 [2706-2717]	1	1556.8	0			15.4	680.3	7.3	235.3	177.1		14.2	9.4			15.3		169.2	26.7	15.7	434.4		Not Found	Not Found	Peak Found	High	Peak Found	Peak Found	High	Not Found	Peak Found	Peak Found	Not Found	Not Found	Peak Found	Not Found	Peak Found	Peak Found	Peak Found
	FALSE	High	[R].KQITMEELVR.[S]	1xOxidation [M5]		1	2	1	Q15149	Q15149 [4027-4036]	1	1262.68	0							809.4	567.8										422.9		Not Found	Not Found	Not Found	Not Found	Not Found	Not Found	Peak Found	High	Not Found	Not Found	Not Found	Not Found	Not Found	Not Found	Not Found	Not Found	Not Found
	FALSE	High	[R].KQITMEELVR.[S]			1	2	2	Q15149	Q15149 [4027-4036]	1	1246.68	0				1387				36.3		61.9		79.9	234.9							Not Found	Not Found	Not Found	High	Not Found	Not Found	Not Found	Peak Found	Not Found	Peak Found	Not Found	Peak Found	Peak Found	Not Found	Not Found	Not Found	Not Found
	FALSE	High	[R].LKQSAEEQAQAR.[A]			1	1	11	Q15149	Q15149 [2254-2265]	1	1358.7	1				595.9		237.3			280.4	0.3			572.3					113.8		Not Found	Not Found	Not Found	High	Not Found	High	Not Found	Not Found	Peak Found	Peak Found	Not Found	Not Found	High	Not Found	Not Found	Not Found	Not Found
	FALSE	High	[R].LKTEAEIALK.[E]			1	1	3	Q15149	Q15149 [1985-1994]	1	1115.67	0			71.7	409.8	7.7		24	128.8	5.8		440.1	8.5	85.9	70.3	13.2	482.3	52			Not Found	Not Found	Peak Found	High	Peak Found	Not Found	Peak Found	Peak Found	Peak Found	Not Found	Peak Found	Peak Found	High	Peak Found	Peak Found	Peak Found	Peak Found
	FALSE	High	[R].LLDPEDVDVPQPDEK.[S]			1	3	16	Q15149	Q15149 [372-386]	0	1708.83	0	22.5	266.7	283.4	257.4	70.4	12.9	102.1	75.9	23	26.3	32.4	56.3	66.6	45.7	275		102	81.4		Peak Found	High	High	High	Peak Found	High	Peak Found	High	Peak Found	Peak Found	Peak Found	Peak Found	High	Peak Found	High	Not Found	High
	FALSE	High	[R].LLDAQLSTGGIVDPSK.[S]			1	2	24	Q15149	Q15149 [3270-3285]	0	1613.87	0	6.2	159.8	181.5	300	117.1	38.5	93.6	42.4		12.2	7.5	50.9	54.3	31.1	104	21.7	63.6	515.7		Peak Found	High	High	High	High	Peak Found	High	High	Not Found	Peak Found	Peak Found	High	High	Peak Found	High	Peak Found	High
	FALSE	High	[R].LLDAQLATGGIVDPR.[L]			1	2	17	Q15149	Q15149 [3936-3950]	0	1538.85	0	23.7	90.8	269.3	315.9	112	25.8	115.9	66.6	37.4	12.8	17.5	94.2	247.3	32.3	145.4	9	59	125.1		High	Peak Found	High	High	High	High	High	High	Peak Found	High	Peak Found	High	Peak Found	Peak Found	High	Peak Found	High
	FALSE	High	[K].LHVAILER.[E]			1	3	1	Q15149	Q15149 [510-517]	0	950.578	0				707.3	18.8		210.8	136.2	41.3	73.1		214.5	277.2	42.2	55.7		18.5	4.5		Not Found	Not Found	Not Found	Peak Found	Peak Found	Not Found	Peak Found	Peak Found	Peak Found	Peak Found	Not Found	Peak Found	High	Peak Found	Peak Found	Not Found	Peak Found
	FALSE	High	[R].LKAEATEAAR.[Q]			1	1	18	Q15149	Q15149 [2349-2358]	1	1059.58	0				834		196.5			115.9	4.7			464.8		32.7			151.4		Not Found	Not Found	Not Found	High	Not Found	High	Not Found	Not Found	High	Peak Found	Not Found	Not Found	High	Not Found	High	Not Found	Not Found
	FALSE	High	[R].LKAEAELLQQQK.[E]			1	1	11	Q15149	Q15149 [2462-2473]	1	1398.8	0			225.9	542.4	57.2	50.9	136.6	61.9	38.1	33.7		149	149.4	10.4	142.9		56	145.5		Not Found	Not Found	High	High	Peak Found	High	Peak Found	Peak Found	Peak Found	Peak Found	Not Found	Peak Found	High	Peak Found	Peak Found	Not Found	Peak Found
	FALSE	High	[K].IKELQNAGDR.[L]			1	2	1	Q15149	Q15149 [809-818]	1	1143.61	0						61.4	99.2	10.8	228.2		1026.7				373.7					Not Found	Not Found	Not Found	Not Found	Not Found	Peak Found	Peak Found	Peak Found	Peak Found	Not Found	Peak Found	Not Found	Not Found	Not Found	High	Not Found	Not Found
	FALSE	High	[R].LLLEAQAATGFLLDPVKGER.[L]			1	2	8	Q15149	Q15149 [3859-3878]	1	2141.2	0	18	13.8	44.4	139.4	51.9		183	139.5	4	17.1	279.6	168.8	167.1	89.4	167	203.9	112.7	0.6		Peak Found	Peak Found	Peak Found	High	Peak Found	Not Found	High	Peak Found	Peak Found	Peak Found	Peak Found	Peak Found	High	Peak Found	High	Peak Found	Peak Found
	FALSE	High	[R].LLLEAQAATGFLLDPVK.[G]			1	2	4	Q15149	Q15149 [3859-3875]	0	1799.03	0	86.8	610.9	404.9	36.4	72.3	7.4	222.4	37.1				150.6		58.1	25.6		86.4	1.2		Peak Found	High	High	Peak Found	Peak Found	Peak Found	Peak Found	Peak Found	Not Found	Not Found	Not Found	High	Not Found	Peak Found	Peak Found	Not Found	Peak Found
	FALSE	High	[R].LLEAAAQSTK.[G]			1	2	4	Q15149	Q15149 [4600-4609]	0	1031.57	0		324.1	413	154.3	248.3		352.4	307.9												Not Found	Peak Found	High	High	Peak Found	Not Found	High	Peak Found	Not Found	Not Found	Not Found	Not Found	Not Found	Not Found	Not Found	Not Found	Not Found
	FALSE	High	[R].LLEAQACTGGIIDPSTGER.[F]	1xCarbamidomethyl [C7]		1	2	4	Q15149	Q15149 [4448-4466]	0	1987.98	0			245.1	387.8	179.5		61.6				346.3		35.2	35.2	406.5		102.8			Not Found	Not Found	Peak Found	High	Peak Found	Not Found	Peak Found	Not Found	Not Found	Not Found	Peak Found	Not Found	High	Peak Found	Peak Found	Not Found	Peak Found
	FALSE	High	[R].LLEAQACTGGIIDPSTGERFPVTDAVNK.[G]	1xCarbamidomethyl [C7]		1	2	2	Q15149	Q15149 [4448-4475]	1	2959.48	0				1217				42.6		34.1		96.9	311.4		97.9					Not Found	Not Found	Not Found	High	Not Found	Not Found	Not Found	Peak Found	Not Found	Peak Found	Not Found	Peak Found	Peak Found	Not Found	Peak Found	Not Found	Not Found
	FALSE	High	[R].LLEAQIATGGVIDPVHSHR.[V]			2	4	8	P58107; Q15149	P58107 [719-737]; [2338-2356]; [2874-2892]; [3405-3423]; [3939-3957]; [4473-4491]; [5006-5024]; Q15149 [2942-2960]	0	2013.09	0				809.2		58.1	167.7	118.1		51.9		176.9	85		154.4		81.8	96.8	Shared	Not Found	Not Found	Not Found	High	Not Found	High	High	High	Not Found	Peak Found	Not Found	High	High	Not Found	Peak Found	Not Found	Peak Found
	FALSE	High	[R].LLEAQIATGGIIDPVHSHR.[V]			2	4	3	P58107; Q15149	P58107 [1680-1698]; Q15149 [3601-3619]	0	2027.1	0				652.3			90.3	72.5	23.2	17	672.5	64.8	112.7	15.6	61.3		17.9		Shared	Not Found	Not Found	Not Found	High	Not Found	Not Found	Peak Found	Peak Found	Peak Found	Peak Found	Peak Found	Peak Found	Peak Found	Peak Found	Peak Found	Not Found	Peak Found
	FALSE	High	[R].LLEAQIATGGIIDPEESHRLPVEVAYK.[R]			1	2	5	Q15149	Q15149 [4179-4205]	1	2948.57	0				983.3		231.4	41.7		22			20.4	381.3	17.7				102.2		Not Found	Not Found	Not Found	High	Not Found	Peak Found	Peak Found	Not Found	Peak Found	Not Found	Not Found	Peak Found	High	Peak Found	Not Found	Not Found	Not Found
	FALSE	High	[R].LLEAQIATGGIIDPEESHR.[L]			1	2	3	Q15149	Q15149 [4179-4197]	0	2049.06	0			241	613.7	37.2		239.4	93.5	35.1			175.7	25	108.8	58.4		172.1			Not Found	Not Found	Peak Found	High	Peak Found	Not Found	High	Peak Found	Peak Found	Not Found	Not Found	Peak Found	Peak Found	Peak Found	Peak Found	Not Found	Peak Found
	FALSE	High	[R].LLFNDVQTLK.[D]			1	3	10	Q15149	Q15149 [588-597]	0	1190.68	1		12.5	205.4	500.6	110.9	57.8	117.6	76.4	158.4	35.3		79	124.6	20.9	72.7		29.2	198.6		Not Found	Peak Found	Peak Found	High	Peak Found	High	High	Peak Found	High	Peak Found	Not Found	High	High	Peak Found	Peak Found	Not Found	Peak Found
	FALSE	High	[R].LFNAIIHR.[H]			1	4	3	Q15149	Q15149 [329-336]	0	983.579	0				325.6		31.2	488.6	791.7	16.7				61.7		42.5			42		Not Found	Not Found	Not Found	High	Not Found	High	Peak Found	Peak Found	Peak Found	Not Found	Not Found	Not Found	Peak Found	Not Found	Peak Found	Not Found	Not Found
	FALSE	High	[K].LEQLFQDEVAK.[A]			1	2	5	Q15149	Q15149 [2653-2663]	0	1319.68	1		166.9	6.3	403	91.6		119.4	71.1	115.4	12.6			69.6	54.2	480			210.1		Not Found	Peak Found	Peak Found	High	Peak Found	Not Found	High	High	Peak Found	Peak Found	Not Found	Not Found	Peak Found	Peak Found	Peak Found	Not Found	Not Found
	FALSE	High	[R].LGFHLPLEVAYQR.[G]			1	2	5	Q15149	Q15149 [3951-3963]	0	1542.84	0				1100.9		56.3	96.5	67.9	56.1	44.8		101.1	273.1					3.2		Not Found	Not Found	Not Found	High	Not Found	High	High	Peak Found	High	Peak Found	Not Found	Peak Found	High	Not Found	Not Found	Not Found	Not Found
	FALSE	High	[R].GGAEGELQALR.[A]			1	1	11	Q15149	Q15149 [1606-1616]	0	1100.57	0		109.5	143.4	393.2	94.5	94.4	56.9	33.8	41.6	24.7		39.5	119	18.4	259.7		52.5	318.7		Not Found	High	High	Peak Found	Peak Found	High	Peak Found	Peak Found	High	Peak Found	Not Found	Peak Found	High	Peak Found	Peak Found	Not Found	Peak Found
	FALSE	High	[K].GGELVYTDSEAR.[D]			1	2	14	Q15149	Q15149 [3028-3039]	0	1296.61	0			175.6	685.6	112.8		162.1	87.3	24.2	43	6.7	41.6	68.8	30.4	257.2	70.8	34			Not Found	Not Found	High	High	High	Not Found	Peak Found	Peak Found	Peak Found	High	Peak Found	Peak Found	High	High	High	Peak Found	High
	FALSE	High	[K].GFFDPNTHENLTYR.[Q]			1	2	5	Q15149	Q15149 [3648-3661]	0	1710.79	0				1276.4			13	20.9	85	66.8		16	270.1	10.1			9.5	32.2		Not Found	Not Found	Not Found	High	Not Found	Not Found	Peak Found	Peak Found	Peak Found	Peak Found	Not Found	Peak Found	High	Peak Found	Not Found	Not Found	Peak Found
	FALSE	High	[K].GFFDPNTHENLTYLQLLER.[C]			2	4	7	P58107; Q15149	P58107 [766-784]; [1727-1745]; Q15149 [2989-3007]	0	2307.14	0				735.8		81	80.9	48.8	51.4	107.5		73.4	421.3	65.8	8.2		105.3	20.4	Shared	Not Found	Not Found	Not Found	High	Not Found	High	Peak Found	High	High	Peak Found	Not Found	Peak Found	Peak Found	Peak Found	Peak Found	Not Found	Peak Found
	FALSE	High	[K].GFFDPNTEENLTYLQLMER.[C]			1	2	4	Q15149	Q15149 [4226-4244]	0	2317.08	0				1513.4					48.5				160.6				77.5			Not Found	Not Found	Not Found	High	Not Found	Not Found	Not Found	Not Found	Peak Found	Not Found	Not Found	Not Found	High	Not Found	Not Found	Not Found	Peak Found
	FALSE	High	[K].GIIRPGTAFELLEAQAATGYVIDPIKGLK.[L]			1	2	2	Q15149	Q15149 [4093-4121]	1	3041.7	0				1711.5									88.5							Not Found	Not Found	Not Found	High	Not Found	Not Found	Not Found	Not Found	Not Found	Not Found	Not Found	Not Found	Peak Found	Not Found	Not Found	Not Found	Not Found
	FALSE	High	[K].GIIRPGTAFELLEAQAATGYVIDPIK.[G]			1	2	6	Q15149	Q15149 [4093-4118]	0	2743.5	0				1270.9					94.4	133.1			206.2				95.4			Not Found	Not Found	Not Found	High	Not Found	Not Found	Not Found	Not Found	Peak Found	High	Not Found	Not Found	High	Not Found	Not Found	Not Found	Peak Found
	FALSE	High	[K].GLVGPELHDR.[L]			1	2	2	Q15149	Q15149 [3888-3897]	0	1092.58	0			216.1	148.6		563.6				71.2		170.6					28.8	601.1		Not Found	Not Found	Peak Found	High	Not Found	Peak Found	Not Found	Not Found	Not Found	Peak Found	Not Found	Peak Found	Not Found	Not Found	Not Found	Not Found	Peak Found
	FALSE	High	[K].GLVEDTLR.[Q]			1	1	3	Q15149	Q15149 [2048-2055]	0	902.494	0				936.8			108.8	48.5		53.2			174		311.5		38.3	128.9		Not Found	Not Found	Not Found	High	Not Found	Not Found	Peak Found	Peak Found	Not Found	Peak Found	Not Found	Not Found	High	Not Found	Peak Found	Not Found	Peak Found
	FALSE	High	[K].GIYQSLEGAVQAGQLK.[V]			1	3	11	Q15149	Q15149 [478-493]	0	1661.89	0	60	633.7	95.1	264.5	111.7	35.9	115.6	51.7	32.1	12.3		66.1	75.6	33.7	63.3		59.3	89.5		Peak Found	Peak Found	Peak Found	High	Peak Found	High	Peak Found	Peak Found	High	Peak Found	Not Found	High	High	Peak Found	Peak Found	Not Found	Peak Found
	FALSE	High	[R].GLHQSIEEFR.[A]			1	3	1	Q15149	Q15149 [697-706]	0	1215.61	0				1064.8			142	82.1	64.8	61		117.7	162.4		54.1		51			Not Found	Not Found	Not Found	Peak Found	Not Found	Not Found	Peak Found	Peak Found	Peak Found	Peak Found	Not Found	Peak Found	High	Not Found	Peak Found	Not Found	Peak Found
	FALSE	High	[R].GLFDEEMNEILTDPSDDTK.[G]	1xOxidation [M7]		1	2	1	Q15149	Q15149 [4207-4225]	0	2184.95	0			45				919.7	422.2				243.6			22.3		147.1			Not Found	Not Found	Peak Found	Not Found	Not Found	Not Found	High	Peak Found	Not Found	Not Found	Not Found	Peak Found	Not Found	Not Found	Peak Found	Not Found	Peak Found
	FALSE	High	[R].GLFDEEMNEILTDPSDDTK.[G]			1	2	6	Q15149	Q15149 [4207-4225]	0	2168.95	0		11.7		1177.4			27.8	55.2	9.4	43.6			131.1		176.7		43.1	124		Not Found	Peak Found	Not Found	High	Not Found	Not Found	Peak Found	Peak Found	Peak Found	Peak Found	Not Found	Not Found	High	Not Found	Peak Found	Not Found	Peak Found
	FALSE	High	[R].FRELAEEAAR.[L]			1	1	6	Q15149	Q15149 [1933-1942]	1	1191.61	1		561.4	14.5	221.2	159.4		20.4	40.5		9.2		192.1	14	4.7	30.1		21.2	511.3		Not Found	Peak Found	Peak Found	High	Peak Found	Not Found	High	Peak Found	Not Found	Peak Found	Not Found	High	High	Peak Found	Peak Found	Not Found	Peak Found
	FALSE	High	[R].FPVTDAVNK.[G]			1	2	2	Q15149	Q15149 [4467-4475]	0	990.525	0		69.2		713.6	5.3	60.2	101.8	65.6	209	20.8		96.5	5.6	23.3	132.5		80.4	216.2		Not Found	Peak Found	Not Found	High	Peak Found	Peak Found	Peak Found	Peak Found	Peak Found	Peak Found	Not Found	Peak Found	Peak Found	Peak Found	Peak Found	Not Found	Peak Found
	FALSE	High	[K].FISETLR.[R]			1	2	1	Q15149	Q15149 [1473-1479]	0	865.478	0				628.5	124.1		112.6	62.1	31.9	31.1	255.2	224.4	51.5		101.3		87.7	89.6		Not Found	Not Found	Not Found	Peak Found	Peak Found	Not Found	Peak Found	Peak Found	Peak Found	Peak Found	Peak Found	Peak Found	High	Not Found	Peak Found	Not Found	Peak Found
	FALSE	High	[R].FLQEEAEK.[M]			1	1	2	Q15149	Q15149 [2402-2409]	0	993.489	0		361.2	380.6		217.9		282.1			54.5	43.8		5.2	121.3	115	26	176.6	15.6		Not Found	High	Peak Found	Not Found	Peak Found	Not Found	Peak Found	Not Found	Not Found	Peak Found	Peak Found	Not Found	Peak Found	Peak Found	High	Peak Found	Peak Found
	FALSE	High	[R].GANVIAGVWLEEAGQK.[L]			1	2	7	Q15149	Q15149 [3159-3174]	0	1641.86	0				573.6	154.6		215.8	125.1	19			191.3	161.4	120.1	101.2		138			Not Found	Not Found	Not Found	High	Peak Found	Not Found	High	Peak Found	Peak Found	Not Found	Not Found	High	Peak Found	Peak Found	Peak Found	Not Found	High
	FALSE	High	[K].GDECQLVGPAQPSHWK.[V]	1xCarbamidomethyl [C4]		1	2	4	Q15149	Q15149 [962-977]	0	1808.84	0				699.7		12.5	142.3		103.4	17.9			147.8		28.9		254.5	393		Not Found	Not Found	Not Found	High	Not Found	Peak Found	Peak Found	Not Found	Peak Found	Peak Found	Not Found	Not Found	Peak Found	Not Found	Peak Found	Not Found	Peak Found
	FALSE	High	[R].HISDLYEDLRDGHNLISLLEVLSGDSLPR.[E]			1	5	1	Q15149	Q15149 [199-227]	1	3276.69	0				63.1			278.9				1215.7		242.3							Not Found	Not Found	Not Found	Peak Found	Not Found	Not Found	Peak Found	Not Found	Not Found	Not Found	Peak Found	Not Found	High	Not Found	Not Found	Not Found	Not Found
	FALSE	High	[R].HISDLYEDLR.[D]			1	5	2	Q15149	Q15149 [199-208]	0	1260.62	0		26.9		1614.9					67.1			22.4	30.2				33.3	5.1		Not Found	Peak Found	Not Found	High	Not Found	Not Found	Not Found	Not Found	Peak Found	Not Found	Not Found	Peak Found	Peak Found	Not Found	Not Found	Not Found	Peak Found
	FALSE	High	[R].HHTAAFEER.[R]			1	3	1	Q15149	Q15149 [434-442]	0	1097.51	0				1800																Not Found	Not Found	Not Found	High	Not Found	Not Found	Not Found	Not Found	Not Found	Not Found	Not Found	Not Found	Not Found	Not Found	Not Found	Not Found	Not Found
	FALSE	High	[R].KGLVGPELHDR.[L]			1	2	2	Q15149	Q15149 [3887-3897]	1	1220.67	0		47.1	139.6		32.6	24.7	415.3	178.7		35.4		279.7		75.7			55.3	516.1		Not Found	Peak Found	Peak Found	Not Found	Peak Found	Peak Found	Peak Found	High	Not Found	Peak Found	Not Found	High	Not Found	Peak Found	Not Found	Not Found	Peak Found
	FALSE	High	[K].KGIIRPGTAFELLEAQAATGYVIDPIK.[G]			1	2	3	Q15149	Q15149 [4092-4118]	1	2871.6	0				695.2		11.4			57.9	76.2		32.8	926.5							Not Found	Not Found	Not Found	High	Not Found	Peak Found	Not Found	Not Found	Peak Found	Peak Found	Not Found	Peak Found	High	Not Found	Not Found	Not Found	Not Found
	FALSE	High	[K].KDLLPSDMAVALLEAQAGTGHIIDPATSAR.[L]			1	2	1	Q15149	Q15149 [3183-3212]	1	3061.6	0				1733.4									66.6							Not Found	Not Found	Not Found	High	Not Found	Not Found	Not Found	Not Found	Not Found	Not Found	Not Found	Not Found	Peak Found	Not Found	Not Found	Not Found	Not Found
	FALSE	High	[R].GRLPLLAVCDYK.[Q]	1xCarbamidomethyl [C9]		1	2	1	Q15149	Q15149 [942-953]	1	1404.77	0		12.8		1189.9		41.3	60.2	60.8	21.6	24.6		30.9	283.6		60.8			13.5		Not Found	Peak Found	Not Found	Peak Found	Not Found	Peak Found	Peak Found	Peak Found	Peak Found	Peak Found	Not Found	Peak Found	High	Not Found	Peak Found	Not Found	Not Found
	FALSE	High	[K].GWLYYEAGQR.[F]			1	2	6	Q15149	Q15149 [4514-4523]	0	1242.59	0				679.8		71.3	4.5		121.4		735.6	12.2	158.5				10.4	6.3		Not Found	Not Found	Not Found	High	Not Found	High	Peak Found	Not Found	Peak Found	Not Found	Peak Found	Peak Found	High	Not Found	Not Found	Not Found	Peak Found
	FALSE	High	[R].GYFSEEMNR.[V]			1	2	4	Q15149	Q15149 [3629-3637]	0	1132.47	0	137.3		46.1	1302.8		6.4			63.8	11.3			196.4				25	10.8		Peak Found	Not Found	Peak Found	High	Not Found	Peak Found	Not Found	Not Found	Peak Found	Peak Found	Not Found	Not Found	High	Not Found	Not Found	Not Found	Peak Found
	FALSE	High	[CR].GYFDEEMNR.[IV]	1xOxidation [M7]		2	4	1	P58107; Q15149	P58107 [1708-1716]; [2366-2374]; [2902-2910]; [3433-3441]; [3967-3975]; [4501-4509]; [5034-5042]; Q15149 [2970-2978]	0	1176.46	0			106	181.7			757.9	432		98.8	28.2	142.9					52.7		Shared	Not Found	Not Found	Peak Found	High	Not Found	Not Found	Peak Found	Peak Found	Not Found	Peak Found	Peak Found	Peak Found	Not Found	Not Found	Not Found	Not Found	Peak Found
	FALSE	High	[R].GYLNKDTHDQLSEPSEVR.[S]			1	2	4	Q15149	Q15149 [3964-3981]	1	2088	0				1008			70.9	57.1	59.2	68.3		88	347.8		100.9					Not Found	Not Found	Not Found	High	Not Found	Not Found	Peak Found	Peak Found	Peak Found	Peak Found	Not Found	Peak Found	High	Not Found	Peak Found	Not Found	Not Found
	FALSE	High	[K].GYYSPYSVSGSGSTAGSR.[T]	2xPhospho [Y/S/T]	Q15149 2xPhospho [Y/T/S]	1	2	4	Q15149	Q15149 [4610-4627]	0	1942.73	0	30.1		543.2		201.8		482.1	68.4		21		176.3		126.2			150.9			Peak Found	Not Found	High	Not Found	Peak Found	Not Found	High	Peak Found	Not Found	Peak Found	Not Found	High	Not Found	Peak Found	Not Found	Not Found	Peak Found
	FALSE	High	[K].GYYSPYSVSGSGSTAGSR.[T]	1xPhospho [Y/S]	Q15149 1xPhospho [S/Y]	1	2	4	Q15149	Q15149 [4610-4627]	0	1862.76	0	147.3			66.2	416.4		135.2	62.1		89		618.2		265.6						High	Peak Found	Not Found	High	Peak Found	Not Found	Peak Found	Peak Found	Not Found	Peak Found	Peak Found	Peak Found	Peak Found	Peak Found	Peak Found	Not Found	Peak Found
	FALSE	High	[K].GYYSPYSVSGSGSTAGSR.[T]			1	2	2	Q15149	Q15149 [4610-4627]	0	1782.79	0																		1800		Not Found	Not Found	Not Found	Not Found	Not Found	Not Found	Not Found	Not Found	Not Found	Not Found	Not Found	Not Found	Not Found	Not Found	Not Found	Not Found	Not Found
	FALSE	High	[R].GTQGAEEVLR.[A]			1	2	3	Q15149	Q15149 [1234-1243]	0	1059.54	0		341.7	204.4		106.2		152.2	181.2				118.3		237.3	257.3		201.4			Not Found	Peak Found	High	Not Found	High	Not Found	Peak Found	Peak Found	Not Found	Not Found	Not Found	Peak Found	Not Found	Peak Found	Peak Found	Not Found	Peak Found
FALSE	High	Master Protein	Q13813	Spectrin alpha chain, non-erythrocytic 1 OS=Homo sapiens OX=9606 GN=SPTAN1 PE=1 SV=3	0	973.661	70	167	1315	2	1	2472	284.4	5.35	34888	1835.57	163	138	165	86.7	105.5	151	286.6	117.7	47.7	63.5	103.6	80	54.4	41.3	93.6	188.2	42.3	140.3	49.1	54.7	93.9	1.13938e+10	1.38538e+10	1.98404e+10	3.76447e+10	1.54558e+10	6.26263e+09	8.33451e+09	1.36098e+10	1.0504e+10	7.14472e+09	5.42498e+09	1.22908e+10
	Checked	Confidence	Annotated Sequence	Modifications	Modifications in Master Proteins	# Protein Groups	# Proteins	# PSMs	Master Protein Accessions	Positions in Master Proteins	# Missed Cleavages	Theo. MH+ [Da]	# Razor Quan Results	Abundances (Scaled): F1: Sample	Abundances (Scaled): F2: Sample	Abundances (Scaled): F3: Sample	Abundances (Scaled): F4: Sample	Abundances (Scaled): F5: Sample	Abundances (Scaled): F6: Sample	Abundances (Scaled): F7: Sample	Abundances (Scaled): F8: Sample	Abundances (Scaled): F9: Sample	Abundances (Scaled): F10: Sample	Abundances (Scaled): F11: Sample	Abundances (Scaled): F12: Sample	Abundances (Scaled): F13: Sample	Abundances (Scaled): F14: Sample	Abundances (Scaled): F15: Sample	Abundances (Scaled): F16: Sample	Abundances (Scaled): F17: Sample	Abundances (Scaled): F18: Sample	Quan Info	Found in Sample: [S1] F1: Sample	Found in Sample: [S2] F2: Sample	Found in Sample: [S3] F3: Sample	Found in Sample: [S4] F4: Sample	Found in Sample: [S5] F5: Sample	Found in Sample: [S6] F6: Sample	Found in Sample: [S7] F7: Sample	Found in Sample: [S8] F8: Sample	Found in Sample: [S9] F9: Sample	Found in Sample: [S10] F10: Sample	Found in Sample: [S11] F11: Sample	Found in Sample: [S12] F12: Sample	Found in Sample: [S13] F13: Sample	Found in Sample: [S14] F14: Sample	Found in Sample: [S15] F15: Sample	Found in Sample: [S16] F16: Sample	Found in Sample: [S17] F17: Sample
	FALSE	High	[R].NVEDIELWLYEVEGHLASDDYGKDLTNVQNLQK.[K]			2	3	6	A0A0D9SF54; Q13813	A0A0D9SF54 [686-718]; Q13813 [686-718]	1	3847.87	0				612.3			151.6			485.7			178	357.7				14.6	Shared	Not Found	Not Found	Not Found	High	Not Found	Not Found	Peak Found	Not Found	Not Found	High	Not Found	Not Found	Peak Found	Peak Found	Not Found	Not Found	Not Found
	FALSE	High	[R].NVEDIELWLYEVEGHLASDDYGK.[D]			2	3	1	A0A0D9SF54; Q13813	A0A0D9SF54 [686-708]; Q13813 [686-708]	0	2694.26	0				211.3					110.4	962.6			515.7						Shared	Not Found	Not Found	Not Found	High	Not Found	Not Found	Not Found	Not Found	Peak Found	Peak Found	Not Found	Not Found	Peak Found	Not Found	Not Found	Not Found	Not Found
	FALSE	High	[R].NTTGVTEEALKEFSMMFK.[H]			2	3	5	A0A0D9SF54; Q13813	A0A0D9SF54 [2301-2318]; Q13813 [2316-2333]	1	2062.98	0				1038.3		26.2				8.5			727.1						Shared	Not Found	Not Found	Not Found	High	Not Found	Peak Found	Not Found	Not Found	Not Found	Peak Found	Not Found	Not Found	High	Not Found	Not Found	Not Found	Not Found
	FALSE	High	[R].NTTGVTEEALK.[E]			2	3	14	A0A0D9SF54; Q13813	A0A0D9SF54 [2301-2311]; Q13813 [2316-2326]	0	1162.6	1		404.8	331.3	120	122	1.6	73.7	81.5		52.1		17.4	2.3	19.2	226.6		44.2	303.1	Shared	Not Found	High	Peak Found	Peak Found	High	Peak Found	High	High	Not Found	High	Not Found	Peak Found	Peak Found	Peak Found	High	Not Found	Peak Found
	FALSE	High	[K].QKLDILDQER.[A]			2	3	16	A0A0D9SF54; Q13813	A0A0D9SF54 [1398-1407]; Q13813 [1418-1427]	1	1257.68	2	17.9	458.3	262	107.9	29.4	32.3	98.2	81.4	23.1	13.9	3.9	209.1	61.2	72.4	74.6		215.5	38.8	Shared	Peak Found	High	Peak Found	High	Peak Found	High	Peak Found	High	High	Peak Found	Peak Found	Peak Found	High	Peak Found	High	Not Found	Peak Found
	FALSE	High	[K].QEAFLLNEDLGDSLDSVEALLK.[K]			2	3	25	A0A0D9SF54; Q13813	A0A0D9SF54 [486-507]; Q13813 [486-507]	0	2419.22	0	17.5	98.7	80.8	153.2	81.7	46.4	144.9	295.3	34.4	18.5	182.2	176.3	31.2	84.8	85.1		148.4	120.5	Shared	Peak Found	High	Peak Found	High	High	High	High	High	High	High	Peak Found	High	High	High	Peak Found	Not Found	Peak Found
	FALSE	High	[R].QEFAQHANAFHQWIQETR.[T]			2	3	2	A0A0D9SF54; Q13813	A0A0D9SF54 [2193-2210]; Q13813 [2208-2225]	0	2241.06	0				651.7		98.8		364.1	270.5				414.9						Shared	Not Found	Not Found	Not Found	High	Not Found	Peak Found	Not Found	Peak Found	Peak Found	Not Found	Not Found	Not Found	Peak Found	Not Found	Not Found	Not Found	Not Found
	FALSE	High	[K].QDEVNAAWQR.[L]			2	3	10	A0A0D9SF54; Q13813	A0A0D9SF54 [230-239]; Q13813 [230-239]	0	1216.57	1			144.5	78.7	34.6	68.5	194.8	256.7		8.3		274.6	34.1	412.6	61.7		164.1	66.8	Shared	Not Found	Not Found	Peak Found	High	Peak Found	High	Peak Found	High	Not Found	Peak Found	Not Found	High	High	Peak Found	Peak Found	Not Found	Peak Found
	FALSE	High	[R].QFQDAGHFDAENIKK.[K]			2	3	1	A0A0D9SF54; Q13813	A0A0D9SF54 [743-757]; Q13813 [743-757]	1	1747.84	0				625.6			135.2	193.2	180.8	92.7		189.9	382.6						Shared	Not Found	Not Found	Not Found	High	Not Found	Not Found	Peak Found	Peak Found	Peak Found	Peak Found	Not Found	Peak Found	Peak Found	Not Found	Not Found	Not Found	Not Found
	FALSE	High	[R].QFQDAGHFDAENIK.[K]			2	3	4	A0A0D9SF54; Q13813	A0A0D9SF54 [743-756]; Q13813 [743-756]	0	1619.74	0																			No Quan Values	Not Found	Not Found	Not Found	High	Not Found	Not Found	Not Found	Not Found	Not Found	Not Found	Not Found	Not Found	High	Not Found	Not Found	Not Found	Not Found
	FALSE	High	[R].QGFVPAAYVK.[K]			2	3	5	A0A0D9SF54; Q13813	A0A0D9SF54 [1013-1022]; Q13813 [1013-1022]	0	1079.59	1	76.3	327.3	14.2	283.1	73.5	85.4	43.3	83	122.7	54	3.6	81.4	265.8	1.5	190.4	1.2	25.2	68	Shared	Peak Found	Peak Found	Peak Found	Peak Found	Peak Found	High	Peak Found	Peak Found	Peak Found	Peak Found	Peak Found	High	High	Peak Found	Peak Found	Peak Found	Peak Found
	FALSE	High	[K].QETFDAGLQAFQQEGIANITALKDQLLAAK.[H]			2	3	9	A0A0D9SF54; Q13813	A0A0D9SF54 [2003-2032]; Q13813 [2018-2047]	1	3232.68	0				308.3		113	29.3	321.5	46.2	31.2		278.8	445.9		139.9			85.8	Shared	Not Found	Not Found	Not Found	Peak Found	Not Found	High	Peak Found	High	High	Peak Found	Not Found	Peak Found	High	Not Found	High	Not Found	Not Found
	FALSE	High	[K].QETFDAGLQAFQQEGIANITALK.[D]			2	3	11	A0A0D9SF54; Q13813	A0A0D9SF54 [2003-2025]; Q13813 [2018-2040]	0	2493.26	0		267.5	106.2	86.9	98.1		187.4	185	14.5			453.8	14.6	239.1	18.4		121.7	6.7	Shared	Not Found	High	Peak Found	High	Peak Found	Not Found	Peak Found	High	High	Not Found	Not Found	High	High	Peak Found	Peak Found	Not Found	Peak Found
	FALSE	High	[K].NQALNTDNYGHDLASVQALQR.[K]			2	3	21	A0A0D9SF54; Q13813	A0A0D9SF54 [1233-1253]; Q13813 [1253-1273]	0	2328.13	0	37.2	100.2		382.3	35.3	70.5	103.2	151.2	86.3	63.4		178.4	221.5	94.9	100.3		87.4	87.6	Shared	Peak Found	High	Not Found	High	Peak Found	High	Peak Found	High	High	High	Not Found	High	High	Peak Found	Peak Found	Not Found	Peak Found
	FALSE	High	[K].SADESGQALLAAGHYASDEVR.[E]			2	3	24	A0A0D9SF54; Q13813	A0A0D9SF54 [419-439]; Q13813 [419-439]	0	2147	0	13.6	114.4	50.2	388.6	12.6	166	140.2	198.6	55.2	63.3		236.8	149.9	25.7	22.4		26.2	136.2	Shared	Peak Found	High	Peak Found	High	Peak Found	High	High	High	High	Peak Found	Not Found	High	High	Peak Found	Peak Found	Not Found	High
	FALSE	High	[R].RQDLEDSLQAQQYFADANEAESWMR.[E]			2	3	4	A0A0D9SF54; Q13813	A0A0D9SF54 [883-907]; Q13813 [883-907]	1	3001.34	0				1425					57	104.2			213.8						Shared	Not Found	Not Found	Not Found	High	Not Found	Not Found	Not Found	Not Found	Peak Found	Peak Found	Not Found	Not Found	High	Not Found	Not Found	Not Found	Not Found
	FALSE	High	[K].QVEELYHSLLELGEK.[R]			1	2	5	Q13813	Q13813 [1068-1082]	0	1786.92	0				270.8	77.3		194.3	298.5	99.6	133.1		286.5	212.8			88	139.2			Not Found	Not Found	Peak Found	High	Peak Found	High	Peak Found	Peak Found	Peak Found	Peak Found	Not Found	Peak Found	High	Peak Found	Peak Found	Peak Found	Peak Found
	FALSE	High	[R].QQVAPTDDETGKELVLALYDYQEK.[S]			2	3	5	A0A0D9SF54; Q13813	A0A0D9SF54 [958-981]; Q13813 [958-981]	1	2753.35	0				252	60.7		171.4	344.9		214.8		488	219.3		48.8				Shared	Not Found	Not Found	Not Found	High	Peak Found	Not Found	Peak Found	Peak Found	Not Found	High	Not Found	Peak Found	High	Not Found	Peak Found	Not Found	Not Found
	FALSE	High	[K].RLEAELAAHEPAIQGVLDTGKK.[L]			2	3	5	A0A0D9SF54; Q13813	A0A0D9SF54 [1793-1814]; Q13813 [1808-1829]	2	2346.28	0	54.1	183	11.8	507.2	46.6		55.1	64.1	68.5	71.5		83	454.8	28	78.7		39.7	53.8	Shared	Peak Found	Peak Found	Peak Found	High	Peak Found	High	Peak Found	Peak Found	High	Peak Found	Not Found	High	High	Peak Found	Peak Found	Not Found	Peak Found
	FALSE	High	[K].RLEAELAAHEPAIQGVLDTGK.[K]			2	3	5	A0A0D9SF54; Q13813	A0A0D9SF54 [1793-1813]; Q13813 [1808-1828]	1	2218.18	0				439.4			120.7	337.2	186.4	167.2		135.7	302.3		90.8		20.4		Shared	Not Found	Not Found	Not Found	High	Not Found	Not Found	Peak Found	Peak Found	High	Peak Found	Not Found	Peak Found	High	Not Found	Peak Found	Not Found	Peak Found
	FALSE	High	[R].RAQLADSFHLQQFFR.[D]			2	3	2	A0A0D9SF54; Q13813	A0A0D9SF54 [566-580]; Q13813 [566-580]	1	1863.96	0		7.3		189.2			205	30.6	39.1	32.6		338.7	355		78.2		524.3		Shared	Not Found	Peak Found	Not Found	Peak Found	Not Found	Not Found	Peak Found	Peak Found	Peak Found	Peak Found	Not Found	Peak Found	High	Not Found	Peak Found	Not Found	Peak Found
	FALSE	High	[K].REELITNWEQIR.[T]			2	3	7	A0A0D9SF54; Q13813	A0A0D9SF54 [336-347]; Q13813 [336-347]	1	1586.83	1			195.1	771.1				11.7	152.4	141.6			456.5					71.6	Shared	Not Found	Not Found	Peak Found	High	Not Found	Not Found	Not Found	Peak Found	High	Peak Found	Not Found	Not Found	High	Not Found	Not Found	Not Found	Not Found
	FALSE	High	[K].LQIASDENYKDPTNLQGK.[L]			2	4	17	A0A0D9SF54; Q13813	A0A0D9SF54 [64-81]; Q13813 [64-81]	1	2034.01	0	125.6		64.1	291.8	211.6	83	78.9	134.6	67.1	97.9		138.4	117.1		70.3	7.6	42.9	269.2	Shared	Peak Found	Not Found	Peak Found	High	Peak Found	High	Peak Found	High	High	Peak Found	Not Found	High	High	Not Found	Peak Found	Peak Found	Peak Found
	FALSE	High	[R].LQQSHPLSATQIQVK.[R]			2	3	14	A0A0D9SF54; Q13813	A0A0D9SF54 [321-335]; Q13813 [321-335]	0	1677.93	0			316.2	400.4	83.9	107	61.9	121.6	115.3	57.1	10.6	93.4	147.5		58		27.6	199.4	Shared	Not Found	Not Found	High	High	Peak Found	High	High	High	High	Peak Found	Peak Found	Peak Found	High	Not Found	High	Not Found	Peak Found
	FALSE	High	[K].LQTASDESYKDPTNIQSK.[H]			1	1	18	Q13813	Q13813 [1571-1588]	1	2024.98	0	40.9	212.2	134.7	280.7	102.8	47.8		169.3	45.7	20.6		112.2	371.2		117.5	50.1	79.2	15.1		Peak Found	Peak Found	Peak Found	High	Peak Found	High	Not Found	High	High	High	Not Found	High	High	Not Found	Peak Found	Peak Found	Peak Found
	FALSE	High	[K].LSDDNTIGKEEIQQR.[L]			2	3	21	A0A0D9SF54; Q13813	A0A0D9SF54 [1815-1829]; Q13813 [1830-1844]	1	1745.87	0		122.8	129.1	303.6	71.9	62.5	80.9	102.8	49.2	45.5		121.1	325	24.8	140.9		81.8	138.3	Shared	Not Found	Peak Found	Peak Found	High	High	High	High	High	High	High	Not Found	Peak Found	High	Peak Found	Peak Found	Not Found	Peak Found
	FALSE	High	[K].LLVGSEDYGR.[D]			2	3	9	A0A0D9SF54; Q13813	A0A0D9SF54 [1770-1779]; Q13813 [1785-1794]	0	1108.56	0		196.5	243.7	184.4	80.7	37.3	62.6	106.5	76.2	42.7		97.4	190.5	34.1	181.4			266.1	Shared	Not Found	High	High	Peak Found	Peak Found	High	High	Peak Found	Peak Found	High	Not Found	Peak Found	High	Peak Found	Peak Found	Not Found	Not Found
	FALSE	High	[K].LIQNNHYAMEDVATRR.[D]			2	3	1	A0A0D9SF54; Q13813	A0A0D9SF54 [533-548]; Q13813 [533-548]	1	1930.96	0				1533.5									266.5						Shared	Not Found	Not Found	Not Found	Peak Found	Not Found	Not Found	Not Found	Not Found	Not Found	Not Found	Not Found	Not Found	High	Not Found	Not Found	Not Found	Not Found
	FALSE	High	[K].LIQNNHYAMEDVATR.[R]	1xOxidation [M9]		2	3	2	A0A0D9SF54; Q13813	A0A0D9SF54 [533-547]; Q13813 [533-547]	0	1790.85	0							471.3	748.4				561.6					18.6		Shared	Not Found	Not Found	Not Found	Not Found	Not Found	Not Found	High	High	Not Found	Not Found	Not Found	Peak Found	Not Found	Not Found	Not Found	Not Found	Peak Found
	FALSE	High	[K].LIQNNHYAMEDVATR.[R]			2	3	1	A0A0D9SF54; Q13813	A0A0D9SF54 [533-547]; Q13813 [533-547]	0	1774.85	0																			No Quan Values	Peak Found	Not Found	Not Found	High	Not Found	Peak Found	Not Found	Not Found	Peak Found	Not Found	Not Found	Not Found	Peak Found	Not Found	Not Found	Not Found	Not Found
	FALSE	High	[K].LIQEQHPEEELIK.[T]			2	3	7	A0A0D9SF54; Q13813	A0A0D9SF54 [215-227]; Q13813 [215-227]	0	1605.85	0			810.4	161.6	53.2	47.8	67.1	25.8	87.8	32.9			52.7	13.7	321		36.2	89.8	Shared	Not Found	Not Found	High	High	Peak Found	Peak Found	Peak Found	Peak Found	Peak Found	Peak Found	Not Found	Not Found	High	Peak Found	Peak Found	Not Found	Peak Found
	FALSE	High	[R].LIQSHPESAEDLQEK.[C]			2	3	18	A0A0D9SF54; Q13813	A0A0D9SF54 [1279-1293]; Q13813 [1299-1313]	0	1723.85	0		126.7	29.3	489.8	78	5.8	67.6	134.1	89.9	53.4	17.8	87.6	258.2	26	275.1	6	37.4	17.3	Shared	Not Found	High	Peak Found	High	High	High	Peak Found	High	High	Peak Found	Peak Found	High	High	Peak Found	High	Peak Found	High
	FALSE	High	[R].LMVHTVATFNSIK.[E]			2	3	7	A0A0D9SF54; Q13813	A0A0D9SF54 [1177-1189]; Q13813 [1197-1209]	0	1460.79	0				1130.6					135.9	56.7			365.6					111.2	Shared	Not Found	Not Found	Not Found	High	Not Found	Not Found	Not Found	Not Found	Peak Found	Peak Found	Not Found	Not Found	High	Not Found	Not Found	Not Found	Not Found
	FALSE	High	[R].MQHNLEQQIQAR.[N]	1xOxidation [M1]		2	3	7	A0A0D9SF54; Q13813	A0A0D9SF54 [2289-2300]; Q13813 [2304-2315]	0	1511.74	0		124.2	301	22.9		171.5	92.9	385.1		1.1	18.6	180.6	3.4	123.3	105	92.5	49.8	128	Shared	Not Found	High	Peak Found	Peak Found	Not Found	Peak Found	High	High	Not Found	Peak Found	Peak Found	Peak Found	Peak Found	Peak Found	Peak Found	Peak Found	Peak Found
	FALSE	High	[R].MQHNLEQQIQAR.[N]			2	3	10	A0A0D9SF54; Q13813	A0A0D9SF54 [2289-2300]; Q13813 [2304-2315]	0	1495.74	0	20	27.8	55.6	534.5	59	65.7	15.5		93.4	29.5	36		136	2.7	529.2	32.6	33.2	129.3	Shared	Peak Found	Peak Found	Peak Found	High	Peak Found	High	Peak Found	Not Found	High	Peak Found	Peak Found	Not Found	High	Peak Found	Peak Found	Peak Found	Peak Found
	FALSE	High	[K].MTLVASEDYGDTLAAIQGLLKK.[H]			2	3	2	A0A0D9SF54; Q13813	A0A0D9SF54 [1875-1896]; Q13813 [1890-1911]	1	2337.24	0				1361.2		60.1			14.9				307.4				56.4		Shared	Not Found	Not Found	Not Found	High	Not Found	Peak Found	Not Found	Not Found	Peak Found	Not Found	Not Found	Not Found	Peak Found	Not Found	Not Found	Not Found	Peak Found
	FALSE	High	[K].MTLVASEDYGDTLAAIQGLLK.[K]	1xOxidation [M1]		2	3	14	A0A0D9SF54; Q13813	A0A0D9SF54 [1875-1895]; Q13813 [1890-1910]	0	2225.14	0		278.2	62	44.5		15	156.7	348.1	9	8		473.5	12.5	97.7	47.3		205.6	41.9	Shared	Not Found	Peak Found	Peak Found	High	Not Found	High	High	High	Peak Found	High	Not Found	Peak Found	High	Peak Found	Peak Found	Not Found	Peak Found
	FALSE	High	[K].MTLVASEDYGDTLAAIQGLLK.[K]			2	3	13	A0A0D9SF54; Q13813	A0A0D9SF54 [1875-1895]; Q13813 [1890-1910]	0	2209.14	0		113.2	36.1	355.9	186.7	101.9		57.6	91	94.8		52.2	357.6	44.9	60.3		190.3	57.6	Shared	Not Found	Peak Found	Peak Found	High	High	High	Not Found	High	Peak Found	High	Not Found	Peak Found	High	Peak Found	Peak Found	Not Found	High
	FALSE	High	[R].MMLDQCLELQLFHR.[D]	1xCarbamidomethyl [C6]		2	3	1	A0A0D9SF54; Q13813	A0A0D9SF54 [1419-1432]; Q13813 [1439-1452]	0	1833.88	0				1800															Shared	Not Found	Not Found	Not Found	High	Not Found	Not Found	Not Found	Not Found	Not Found	Not Found	Not Found	Not Found	Not Found	Not Found	Not Found	Not Found	Not Found
	FALSE	High	[R].MNEVISLWK.[K]			2	3	3	A0A0D9SF54; Q13813	A0A0D9SF54 [653-661]; Q13813 [653-661]	0	1119.59	0				1142.6					187.1				470.3						Shared	Not Found	Not Found	Not Found	High	Not Found	Not Found	Not Found	Not Found	Peak Found	Not Found	Not Found	Not Found	High	Not Found	Not Found	Not Found	Not Found
	FALSE	High	[K].ITALDEFATK.[L]			2	3	18	A0A0D9SF54; Q13813	A0A0D9SF54 [523-532]; Q13813 [523-532]	0	1108.59	0		132.4	185.8	378.1	62.4	79.1	31.8	65.5	116.1	33.3	7.1	44.5	225.8	20.8	151.3	12.7	15.9	237.4	Shared	Not Found	High	High	High	Peak Found	High	High	High	High	Peak Found	Peak Found	Peak Found	High	Peak Found	Peak Found	Peak Found	Peak Found
	FALSE	High	[K].LTVLSEER.[A]			2	3	14	A0A0D9SF54; Q13813	A0A0D9SF54 [442-449]; Q13813 [442-449]	0	946.52	0	18.7	211.2	361.7	321.7	107		63.2	120.9	23.5	58.5		57.2	18.9	17	172.6		1.1	246.9	Shared	Peak Found	High	Peak Found	High	Peak Found	Not Found	High	High	Peak Found	High	Not Found	High	Peak Found	Peak Found	High	Not Found	Peak Found
	FALSE	High	[K].VLETAEDIQER.[R]			2	5	18	A0A0D9SF54; Q13813	A0A0D9SF54 [8-18]; Q13813 [8-18]	0	1302.65	0			338.3	394.6	114.9		77.3	0.9	63.3	47.3	26.8	22.9	244.8	18.1	334.3	3.8	112.8		Shared	Not Found	High	High	High	High	Not Found	High	Peak Found	High	High	Peak Found	Peak Found	Peak Found	Peak Found	High	High	Peak Found
	FALSE	High	[K].VNSLGETAER.[L]			2	3	1	A0A0D9SF54; Q13813	A0A0D9SF54 [1269-1278]; Q13813 [1289-1298]	0	1075.54	0		522.4	371.5			56.6	195.6			66.5							136.4	451.2	Shared	Not Found	Peak Found	Peak Found	Not Found	Not Found	Peak Found	Peak Found	Not Found	Not Found	Peak Found	Not Found	Not Found	Not Found	Not Found	Not Found	Not Found	High
	FALSE	High	[R].VNEVNQFAAK.[L]			2	3	12	A0A0D9SF54; Q13813	A0A0D9SF54 [205-214]; Q13813 [205-214]	0	1119.58	0		339	380.9	136.8	180.9		94.2	171.9		62.5		169.4			195.4		69		Shared	Not Found	High	High	Peak Found	High	Not Found	Peak Found	High	Not Found	High	Not Found	Peak Found	Not Found	Not Found	High	Not Found	Peak Found
	FALSE	High	[R].VNDVCTNGQDLIK.[K]	1xCarbamidomethyl [C5]		2	3	7	A0A0D9SF54; Q13813	A0A0D9SF54 [1911-1923]; Q13813 [1926-1938]	0	1475.72	0			74.3	215.5	46.9	128.2	11.8		111.8	38.2		43	178.5	122	286.7		53.9	489.3	Shared	Not Found	Not Found	Peak Found	High	Peak Found	High	Peak Found	Not Found	High	Peak Found	Not Found	Peak Found	High	Peak Found	Peak Found	Not Found	Peak Found
	FALSE	High	[K].VAEDLESEGLMAEEVQAVQQQEVYGMMPR.[D]			2	3	2	A0A0D9SF54; Q13813	A0A0D9SF54 [1133-1161]; Q13813 [1153-1181]	0	3266.5	0				1800															Shared	Not Found	Not Found	Not Found	High	Not Found	Not Found	Not Found	Not Found	Not Found	Not Found	Not Found	Not Found	Not Found	Not Found	Not Found	Not Found	Not Found
	FALSE	High	[R].VASNPYTWFTMEALEETWR.[N]			2	3	4	A0A0D9SF54; Q13813	A0A0D9SF54 [2147-2165]; Q13813 [2162-2180]	0	2331.08	0				618.8						711.8			469.4						Shared	Not Found	Not Found	Not Found	High	Not Found	Not Found	Not Found	Not Found	Not Found	High	Not Found	Not Found	Peak Found	Not Found	Not Found	Not Found	Not Found
	FALSE	High	[R].YEALKEPMVAR.[K]			2	3	1	A0A0D9SF54; Q13813	A0A0D9SF54 [766-776]; Q13813 [766-776]	1	1306.68	0	20.8			1080	66.2			4.4	143.5	45.9		16	332	9.5	45.6		36.2		Shared	Peak Found	Not Found	Not Found	High	Peak Found	Not Found	Not Found	Peak Found	Peak Found	Peak Found	Not Found	Peak Found	Peak Found	Peak Found	Peak Found	Not Found	Peak Found
	FALSE	High	[K].YTEHSTVGLAQQWDQLDQLGMR.[M]			2	3	5	A0A0D9SF54; Q13813	A0A0D9SF54 [2267-2288]; Q13813 [2282-2303]	0	2576.22	0				1139.9					140.8	135.8			329.4		36.7		17.5		Shared	Not Found	Not Found	Not Found	High	Not Found	Not Found	Not Found	Not Found	High	Peak Found	Not Found	Not Found	Peak Found	Not Found	Peak Found	Not Found	Peak Found
	FALSE	High	[R].WSQLLANSAAR.[K]			2	3	13	A0A0D9SF54; Q13813	A0A0D9SF54 [2050-2060]; Q13813 [2065-2075]	0	1216.64	0		138.9		313.1	125.9	22.7	102	235.6		115.4		85.2	296.6	86.1	154.5		80.8	43.3	Shared	Not Found	High	Not Found	High	Peak Found	Peak Found	Peak Found	High	Not Found	High	Not Found	High	High	Peak Found	Peak Found	Not Found	Peak Found
	FALSE	High	[R].SSLSSAQADFNQLAELDR.[Q]			2	3	18	A0A0D9SF54; Q13813	A0A0D9SF54 [2123-2140]; Q13813 [2138-2155]	0	1951.94	0		195.2	83.8	123.1	161.6		57.1	219.1	36.8	125.5	174.1	151.5	89.9		65.7	71.8	113	131.6	Shared	Not Found	Peak Found	Peak Found	High	High	Not Found	High	High	High	Peak Found	Peak Found	Peak Found	High	Not Found	High	Peak Found	High
	FALSE	High	[K].SSEEIESAFR.[A]			2	4	13	A0A0D9SF54; Q13813	A0A0D9SF54 [2390-2399]; Q13813 [2405-2414]	0	1154.53	0	32.9	132.8	257.3	276.9	79.4	48.3	52.7	103	60.8	51.8	19.5	67.4	136.9	16	217.4	3.5	28	215.3	Shared	Peak Found	High	High	High	Peak Found	Peak Found	Peak Found	Peak Found	High	Peak Found	Peak Found	Peak Found	High	Peak Found	High	Peak Found	Peak Found
	FALSE	High	[R].SQLLGSAHEVQR.[F]			2	3	22	A0A0D9SF54; Q13813	A0A0D9SF54 [1206-1217]; Q13813 [1226-1237]	0	1324.7	0	15.4	187.8	236.5	81.6	70.1	35.8	151.4	303.7	50.6	56.9		163.7	52.7	23.6	128.3		12.3	229.7	Shared	Peak Found	High	High	High	High	High	Peak Found	High	Peak Found	High	Not Found	High	High	Peak Found	High	Not Found	Peak Found
	FALSE	High	[R].SLGYDLPMVEEGEPDPEFEAILDTVDPNR.[D]			2	3	2	A0A0D9SF54; Q13813	A0A0D9SF54 [2339-2367]; Q13813 [2354-2382]	0	3247.5	0				1561.8					238.2										Shared	Not Found	Not Found	Not Found	High	Not Found	Not Found	Not Found	Not Found	Peak Found	Not Found	Not Found	Not Found	Not Found	Not Found	Not Found	Not Found	Not Found
	FALSE	High	[R].SLQQLAEER.[S]			2	3	7	A0A0D9SF54; Q13813	A0A0D9SF54 [1197-1205]; Q13813 [1217-1225]	0	1073.56	0			312.5	388.2	181.9		63.7	113.3	101.1	52.4		68	199.6	25.3	229.4	12.4	52.3		Shared	Not Found	High	Peak Found	High	Peak Found	Not Found	Peak Found	Peak Found	Peak Found	Peak Found	Not Found	Peak Found	High	High	Peak Found	Peak Found	Peak Found
	FALSE	High	[R].SLQQLAEER.[S]	1xPhospho [S1]	A0A0D9SF54 1xPhospho [S1197]; Q13813 1xPhospho [S1217]	2	3	8	A0A0D9SF54; Q13813	A0A0D9SF54 [1197-1205]; Q13813 [1217-1225]	0	1153.52	0	123.6	929.8	467.6		80.3		31.8	13		10.8	26.7			81	10.3		25.1		Shared	Peak Found	High	High	Not Found	High	Not Found	Peak Found	High	Not Found	Peak Found	Peak Found	Not Found	Not Found	Peak Found	Peak Found	Not Found	Peak Found
	FALSE	High	[R].TYLLDGSCMVEESGTLESQLEATK.[R]	1xCarbamidomethyl [C8]		2	2	2	A0A0D9SF54; Q13813	A0A0D9SF54 [2211-2234]; Q13813 [2226-2249]	0	2661.23	0				439.3	1137.4					217								6.3	Shared	Not Found	Not Found	Not Found	High	Peak Found	Not Found	Not Found	Not Found	Not Found	Peak Found	Not Found	Not Found	Not Found	Not Found	Not Found	Not Found	Not Found
	FALSE	High	[K].TATDEAYKDPSNLQGK.[V]			2	3	17	A0A0D9SF54; Q13813	A0A0D9SF54 [595-610]; Q13813 [595-610]	1	1737.83	0	15.2	110.5	160.6	265.7	114.5	29.6	51.7	104.6	230.1	44	31.5	64.6	160.2	51.9	168.7		79.8	116.7	Shared	Peak Found	High	High	High	High	High	High	High	Peak Found	High	Peak Found	Peak Found	High	Peak Found	Peak Found	Not Found	Peak Found
	FALSE	High	[K].TKQDEVNAAWQR.[L]			2	3	15	A0A0D9SF54; Q13813	A0A0D9SF54 [228-239]; Q13813 [228-239]	1	1445.71	0	64.1	21.1	10.3	377.5	9.6	76	39.3	149.7	70.3	50.1	65.8	144.3	171.4	25.3	20.9	241.9	39.2	223.1	Shared	Peak Found	Peak Found	Peak Found	High	Peak Found	High	High	High	Peak Found	High	Peak Found	High	High	Peak Found	Peak Found	Peak Found	Peak Found
	FALSE	High	[K].EELYQNLTR.[E]			2	3	8	A0A0D9SF54; Q13813	A0A0D9SF54 [2412-2420]; Q13813 [2427-2435]	0	1165.58	1		47	257.1	306.8	102.1	1.4	54.4	63.2	219.3	43.6	29.8	43.2	132.1	29	184	9.6	38.4	239.1	Shared	Not Found	Peak Found	High	Peak Found	Peak Found	Peak Found	Peak Found	High	Peak Found	Peak Found	Peak Found	High	Peak Found	Peak Found	High	Peak Found	High
	FALSE	High	[R].EELITNWEQIR.[T]			2	3	6	A0A0D9SF54; Q13813	A0A0D9SF54 [337-347]; Q13813 [337-347]	0	1430.73	0				1028.5			43.2	42.2	191.4	144.9		74.5	225.5	49.9					Shared	Not Found	Not Found	Not Found	High	Peak Found	Peak Found	Peak Found	Peak Found	Peak Found	Peak Found	Not Found	Peak Found	High	Peak Found	Not Found	Not Found	Not Found
	FALSE	High	[K].EFSMMFK.[H]			2	3	2	A0A0D9SF54; Q13813	A0A0D9SF54 [2312-2318]; Q13813 [2327-2333]	0	919.405	0		11.9	21.3	1286.7					216.9	17.3	46.3		55.1		5.3	70.6		68.6	Shared	Not Found	Peak Found	Peak Found	High	Not Found	Not Found	Not Found	Not Found	Peak Found	Peak Found	Peak Found	Not Found	High	Not Found	Peak Found	Peak Found	Not Found
	FALSE	High	[R].ECEDVMDWINDKEAIVTSEELGQDLEHVEVLQK.[K]	1xCarbamidomethyl [C2]		2	3	3	A0A0D9SF54; Q13813	A0A0D9SF54 [157-189]; Q13813 [157-189]	1	3900.82	0			334.4	515.7	94.9					64.1	191.9		150.2	232.8	53.7	162.4			Shared	Not Found	Not Found	Peak Found	High	Peak Found	Not Found	Not Found	Not Found	Not Found	Peak Found	Peak Found	Not Found	High	Peak Found	Peak Found	Peak Found	Not Found
	FALSE	High	[R].EANELQQWINEK.[E]			2	3	5	A0A0D9SF54; Q13813	A0A0D9SF54 [1079-1090]; Q13813 [1099-1110]	0	1501.73	0			387.5		252.9	89.3	44.3	94.1	20.3	45.9	102.3	135.3	161.2	112.8	40		81.4	232.5	Shared	Not Found	Not Found	Peak Found	High	Peak Found	High	Peak Found	Peak Found	Peak Found	Peak Found	Peak Found	Peak Found	High	Peak Found	Peak Found	Not Found	Peak Found
	FALSE	High	[K].EAIVTSEELGQDLEHVEVLQK.[K]			2	3	6	A0A0D9SF54; Q13813	A0A0D9SF54 [169-189]; Q13813 [169-189]	0	2366.21	0	15		72	33	309.4		220.7	93.6	169	53.8	180.7	261.1	60.6	215.3			88.9	26.9	Shared	Peak Found	Not Found	Peak Found	Peak Found	Peak Found	Not Found	Peak Found	High	High	Peak Found	Peak Found	High	Peak Found	Peak Found	Not Found	Not Found	Peak Found
	FALSE	High	[K].EKEQLMASDDFGRDLASVQALLR.[K]			2	3	2	A0A0D9SF54; Q13813	A0A0D9SF54 [273-295]; Q13813 [273-295]	2	2592.31	0									228.5				1571.5						Shared	Not Found	Not Found	Not Found	Not Found	Not Found	Not Found	Not Found	Not Found	Peak Found	Not Found	Not Found	Not Found	High	Not Found	Not Found	Not Found	Not Found
	FALSE	High	[K].EKEQLMASDDFGR.[D]	1xOxidation [M6]		2	3	1	A0A0D9SF54; Q13813	A0A0D9SF54 [273-285]; Q13813 [273-285]	1	1541.69	0																			No Quan Values	Not Found	Peak Found	Peak Found	Peak Found	Not Found	Not Found	High	Peak Found	Not Found	Not Found	Not Found	Peak Found	Peak Found	Peak Found	Peak Found	Not Found	Not Found
	FALSE	High	[K].EKEQLMASDDFGR.[D]			2	3	3	A0A0D9SF54; Q13813	A0A0D9SF54 [273-285]; Q13813 [273-285]	1	1525.7	0		76.7	113.1	737.8		40.7	4.8		352.4	46.4			169.1	109.6	28.9	40	50.6	29.8	Shared	Not Found	Peak Found	Peak Found	High	Not Found	Peak Found	Peak Found	Not Found	Peak Found	Peak Found	Not Found	Not Found	High	Peak Found	Peak Found	Peak Found	Peak Found
	FALSE	High	[R].EKEPIVGSTDYGKDEDSAEALLK.[K]			2	3	7	A0A0D9SF54; Q13813	A0A0D9SF54 [908-930]; Q13813 [908-930]	2	2494.22	0				464.3	96.8		100.8	116.9	182	92.5		230.9	251.8	56.1	134.2		73.9		Shared	Not Found	Not Found	Not Found	High	Peak Found	Not Found	Peak Found	Peak Found	High	High	Not Found	Peak Found	High	Peak Found	Peak Found	Not Found	Peak Found
	FALSE	High	[R].EKEPIAASTNR.[G]			2	3	2	A0A0D9SF54; Q13813	A0A0D9SF54 [802-812]; Q13813 [802-812]	1	1215.63	0																			No Quan Values	Not Found	Not Found	Not Found	Not Found	Not Found	Peak Found	Not Found	Not Found	Not Found	Not Found	Not Found	Not Found	Not Found	Not Found	High	Not Found	Not Found
	FALSE	High	[R].DSDELKSWVNEK.[M]			2	3	6	A0A0D9SF54; Q13813	A0A0D9SF54 [581-592]; Q13813 [581-592]	1	1449.69	0			496.8	85		85.3	245.9			102.5	65.5	122.4	267.6	198.3		21.9	108.7		Shared	Not Found	Not Found	Peak Found	High	Not Found	High	Peak Found	Not Found	Not Found	Peak Found	Peak Found	Peak Found	High	Peak Found	Not Found	Peak Found	Peak Found
	FALSE	High	[R].DMDDEESWIKEK.[K]			2	3	1	A0A0D9SF54; Q13813	A0A0D9SF54 [1757-1768]; Q13813 [1772-1783]	1	1524.65	0				1049.9									750.1						Shared	Not Found	Not Found	Not Found	Peak Found	Not Found	Not Found	Not Found	Not Found	Not Found	Not Found	Not Found	Not Found	High	Not Found	Not Found	Not Found	Not Found
	FALSE	High	[R].DMDDEESWIK.[E]			2	3	2	A0A0D9SF54; Q13813	A0A0D9SF54 [1757-1766]; Q13813 [1772-1781]	0	1267.51	0				1590.7									209.3						Shared	Not Found	Not Found	Not Found	High	Not Found	Not Found	Not Found	Not Found	Not Found	Not Found	Not Found	Not Found	Peak Found	Not Found	Not Found	Not Found	Not Found
	FALSE	High	[K].DLTNVQNLQK.[K]			2	3	13	A0A0D9SF54; Q13813	A0A0D9SF54 [709-718]; Q13813 [709-718]	0	1172.63	0		313.2	250	278	114		45.6	46	185	0.6		85.7	83.9	43.1	78			276.7	Shared	Not Found	High	Peak Found	High	High	Not Found	High	Peak Found	High	Peak Found	Not Found	High	Peak Found	Peak Found	High	Not Found	Not Found
	FALSE	High	[R].DLTGVQNLR.[K]			2	3	12	A0A0D9SF54; Q13813	A0A0D9SF54 [1780-1788]; Q13813 [1795-1803]	0	1015.55	0	28.6	125.2	52.3	237.8	102.2	0.6	60	87.9	44.5	47.4	513.6	57.3	104.8	92.1	143.1	42.3	53.5	6.7	Shared	Peak Found	High	Peak Found	High	Peak Found	Peak Found	High	High	Peak Found	High	Peak Found	High	High	Peak Found	Peak Found	Peak Found	Peak Found
	FALSE	High	[R].DLSSVQTLLTK.[Q]			2	3	18	A0A0D9SF54; Q13813	A0A0D9SF54 [1992-2002]; Q13813 [2007-2017]	0	1204.68	0		4.9	77.8	482.9	94.8	56.4	44.8	97.9	167.2	42.6	29	54	317.7	18.2	141.8	2.7	36.9	130.6	Shared	Not Found	Peak Found	High	High	Peak Found	High	High	High	Peak Found	High	Peak Found	High	High	Peak Found	High	Peak Found	Peak Found
	FALSE	High	[R].DLTSWVTEMK.[A]			2	3	4	A0A0D9SF54; Q13813	A0A0D9SF54 [372-381]; Q13813 [372-381]	0	1209.58	0	11.5	8.7		1179					199.1	10.2			362.6	26				2.9	Shared	Peak Found	Peak Found	Not Found	High	Not Found	Not Found	Not Found	Not Found	Peak Found	Peak Found	Not Found	Not Found	High	Peak Found	Not Found	Not Found	Not Found
	FALSE	High	[K].EAALTSEEVGADLEQVEVLQK.[K]			2	3	16	A0A0D9SF54; Q13813	A0A0D9SF54 [1091-1111]; Q13813 [1111-1131]	0	2258.14	0		3	227.1	10.9	363.1		218.6	172.3	6.5	26.9	34.7	348.7	13.3	171.4	60.7	18.8	123.1	0.8	Shared	Not Found	Peak Found	High	High	High	Not Found	Peak Found	High	High	High	Peak Found	High	High	Peak Found	Peak Found	Peak Found	High
	FALSE	High	[R].EAFLNTEDKGDSLDSVEALIK.[K]			2	3	23	A0A0D9SF54; Q13813	A0A0D9SF54 [1445-1465]; Q13813 [1465-1485]	1	2294.14	0	14	63.9	2.5	255	220.7	99.8	119.4	185.3	98.8	80.3		113.5	279.1	50.5	78.3	8.9	61.1	69	Shared	Peak Found	High	Peak Found	High	High	High	High	High	High	High	Not Found	Peak Found	High	Peak Found	High	Peak Found	Peak Found
	FALSE	High	[R].DVEDEETWIR.[E]			2	3	9	A0A0D9SF54; Q13813	A0A0D9SF54 [792-801]; Q13813 [792-801]	0	1291.58	0	198.8			379	29.9	95	37.2	67.7	120.6	35.8		36.2	360	14.5	102.3		16.6	306.4	Shared	Peak Found	Not Found	Not Found	High	Peak Found	Peak Found	Peak Found	Peak Found	High	Peak Found	Not Found	Peak Found	High	Peak Found	High	Not Found	Peak Found
	FALSE	High	[R].DVDETISWIK.[E]			2	3	4	A0A0D9SF54; Q13813	A0A0D9SF54 [263-272]; Q13813 [263-272]	0	1205.6	0		92.3	98.6	264.8	46.2	26.2		76.2	57.5		97.4	128	99.4	104.8	22.3	686.2			Shared	Not Found	High	Peak Found	High	Peak Found	Peak Found	Not Found	High	Peak Found	Not Found	Peak Found	Peak Found	Peak Found	Peak Found	Peak Found	Peak Found	Not Found
	FALSE	High	[R].DVDEIEAWISEK.[L]			2	3	11	A0A0D9SF54; Q13813	A0A0D9SF54 [1539-1550]; Q13813 [1559-1570]	0	1433.68	0	6.9	49.3	95.7	466	133.4		71.4	124	108.6	151.7		153.1	240.5	68.1	60.8		70.6		Shared	Peak Found	Peak Found	Peak Found	High	Peak Found	Not Found	High	High	High	High	Not Found	High	High	Peak Found	Peak Found	Not Found	Peak Found
	FALSE	High	[R].DTEQVDNWMSK.[Q]	1xOxidation [M9]		2	3	3	A0A0D9SF54; Q13813	A0A0D9SF54 [475-485]; Q13813 [475-485]	0	1368.57	0		288.7	436.6		109.5		165.6	90.9			176.2	83.7	1.8	365.9			81.1		Shared	Not Found	Peak Found	Peak Found	Not Found	Peak Found	Not Found	High	High	Not Found	Not Found	Peak Found	Peak Found	Peak Found	Peak Found	Not Found	Not Found	Peak Found
	FALSE	High	[K].DVTGAEALLER.[H]			2	3	18	A0A0D9SF54; Q13813	A0A0D9SF54 [1350-1360]; Q13813 [1370-1380]	0	1173.61	0	33.3	248.3	196	272.9	73.7	41.5	68.8	115.3	109.5	40.3	36.3	52.8	114.5	28	142.3		75.7	150.9	Shared	Peak Found	High	High	High	High	High	High	High	Peak Found	Peak Found	Peak Found	Peak Found	High	Peak Found	High	Not Found	Peak Found
	FALSE	High	[K].FDDFQK.[D]			2	3	1	A0A0D9SF54; Q13813	A0A0D9SF54 [1113-1118]; Q13813 [1133-1138]	0	799.362	0																			No Quan Values	Not Found	Not Found	Not Found	Not Found	Not Found	Not Found	Not Found	High	Not Found	Not Found	Not Found	Not Found	Not Found	Not Found	Not Found	Not Found	Not Found
	FALSE	High	[R].FKELSTLRR.[Q]			2	4	1	A0A0D9SF54; Q13813	A0A0D9SF54 [29-37]; Q13813 [29-37]	2	1149.67	0								277		237.8		217.4	364.7			703.1			Shared	Not Found	Not Found	Not Found	Not Found	Not Found	Not Found	Not Found	Peak Found	Not Found	Peak Found	Not Found	Peak Found	High	Not Found	Not Found	Peak Found	Not Found
	FALSE	High	[R].FKELSTLR.[R]			2	4	1	A0A0D9SF54; Q13813	A0A0D9SF54 [29-36]; Q13813 [29-36]	1	993.573	0			474.3	208.9	188.6		162.9	339.9		159.7	34.1	231.7							Shared	Not Found	Not Found	Peak Found	Peak Found	Peak Found	Not Found	Peak Found	Peak Found	Not Found	High	Peak Found	Peak Found	Not Found	Not Found	Not Found	Not Found	Not Found
	FALSE	High	[K].ELVLALYDYQEK.[S]			2	3	1	A0A0D9SF54; Q13813	A0A0D9SF54 [970-981]; Q13813 [970-981]	0	1483.77	0				116.6	220.5	13.4	148	96.8	217.2	55.1		295.2	52.1	252.7	29		303.5		Shared	Not Found	Not Found	Not Found	Peak Found	High	Peak Found	Peak Found	Peak Found	Peak Found	Peak Found	Not Found	Peak Found	Peak Found	Peak Found	Peak Found	Not Found	Peak Found
	FALSE	High	[R].ENLLEEQGSIALR.[Q]			2	3	19	A0A0D9SF54; Q13813	A0A0D9SF54 [1033-1045]; Q13813 [1033-1045]	0	1471.78	0	17.2	236.4	343.9	135.6	197	22.8	66.4	87.1	151.4	32.2	7	49.6	70.7	7.4	179.1	6.2	37.5	152.5	Shared	High	High	High	High	High	Peak Found	High	High	Peak Found	High	Peak Found	Peak Found	High	Peak Found	High	Peak Found	High
	FALSE	High	[R].ELPTAFDYVEFTR.[S]			2	3	13	A0A0D9SF54; Q13813	A0A0D9SF54 [2440-2452]; Q13813 [2455-2467]	0	1587.77	0	88.6	3.7	82	338.1	49.2	185.7	46.9	75.2	178.7	114		88.9	315.9	32.9	25	6.9	68.3	100.2	Shared	Peak Found	Peak Found	High	High	Peak Found	High	High	Peak Found	High	Peak Found	Not Found	High	High	Peak Found	Peak Found	Peak Found	Peak Found
	FALSE	High	[K].EQLMASDDFGR.[D]			2	3	6	A0A0D9SF54; Q13813	A0A0D9SF54 [275-285]; Q13813 [275-285]	0	1268.56	0	23.9			797.3					178.6	71.7	41.6		154.8	111.6	181.1		53.8	185.6	Shared	Peak Found	Not Found	Not Found	High	Not Found	Not Found	Not Found	Not Found	Peak Found	Peak Found	Peak Found	Not Found	High	Peak Found	Peak Found	Not Found	Peak Found
	FALSE	High	[R].EQADYCVSHMKPYVDGK.[G]	1xCarbamidomethyl [C6]		2	3	2	A0A0D9SF54; Q13813	A0A0D9SF54 [2421-2437]; Q13813 [2436-2452]	0	2026.9	0				1211.7		23.2	12.1				165.7		356.4		10.4	20.5			Shared	Not Found	Not Found	Not Found	High	Not Found	Peak Found	Peak Found	Not Found	Not Found	Not Found	Peak Found	Not Found	Peak Found	Not Found	Peak Found	Peak Found	Not Found
	FALSE	High	[K].ALINADELASDVAGAEALLDR.[H]			2	3	20	A0A0D9SF54; Q13813	A0A0D9SF54 [382-402]; Q13813 [382-402]	0	2127.09	0	26.7	224.7	159.6	75.3	128	37.2	109.6	180.1	36.5	27.7	30.2	266.8	213.7		80.3		153.4	50	Shared	Peak Found	High	High	Peak Found	High	High	Peak Found	High	High	High	Peak Found	Peak Found	High	Not Found	Peak Found	Not Found	Peak Found
	FALSE	High	[K].AKLDENSAFLQFNWK.[A]			2	4	2	A0A0D9SF54; Q13813	A0A0D9SF54 [1955-1969]; Q13813 [1970-1984]	1	1810.91	0																			No Quan Values	Not Found	Not Found	Not Found	Not Found	Not Found	Not Found	Not Found	Not Found	Not Found	Not Found	Not Found	Not Found	High	Not Found	Not Found	Not Found	Not Found
	FALSE	High	[R].AQLADSFHLQQFFR.[D]			2	3	13	A0A0D9SF54; Q13813	A0A0D9SF54 [567-580]; Q13813 [567-580]	0	1707.86	0				527.5		193.6	36.8	125.6	223.8	156		91.1	353.6	4.2	0.6	3		84.3	Shared	Not Found	Not Found	Not Found	High	Not Found	High	Peak Found	Peak Found	High	Peak Found	Not Found	High	High	Peak Found	Peak Found	Peak Found	Not Found
	FALSE	High	[R].ALSSEGKPYVTK.[E]			2	4	11	A0A0D9SF54; Q13813	A0A0D9SF54 [2400-2411]; Q13813 [2415-2426]	0	1279.69	0		494.8	419.3		291.4			303.9		83.6		207							Shared	Not Found	High	High	Not Found	High	Not Found	Not Found	High	Not Found	Peak Found	Not Found	High	Not Found	Not Found	Not Found	Not Found	Not Found
	FALSE	High	[R].ALSSEGKPYVTKEELYQNLTR.[E]			2	3	2	A0A0D9SF54; Q13813	A0A0D9SF54 [2400-2420]; Q13813 [2415-2435]	1	2426.26	0						1800													Shared	Not Found	Not Found	Not Found	Not Found	Not Found	High	Not Found	Not Found	Not Found	Not Found	Not Found	Not Found	Not Found	Not Found	Not Found	Not Found	Not Found
	FALSE	High	[K].ADVVESWIGEK.[E]			2	3	3	A0A0D9SF54; Q13813	A0A0D9SF54 [1970-1980]; Q13813 [1985-1995]	0	1232.62	1	42.4	302.1	295.7	4.5	181.5	61.4	73.3	167.4	230.7	95		120.9	41.1	53.2	79.9		50.9		Shared	High	High	Peak Found	Peak Found	Peak Found	Peak Found	Peak Found	Peak Found	Peak Found	Peak Found	Not Found	High	Peak Found	Peak Found	Peak Found	Not Found	Peak Found
	FALSE	High	[K].ADVVESWIGEKENSLK.[T]			2	3	4	A0A0D9SF54; Q13813	A0A0D9SF54 [1970-1985]; Q13813 [1985-2000]	1	1803.91	0				954.5									845.5						Shared	Not Found	Not Found	Not Found	High	Not Found	Not Found	Not Found	Not Found	Not Found	Not Found	Not Found	Not Found	High	Not Found	Not Found	Not Found	Not Found
	FALSE	High	[R].AALLELWELRR.[Q]			2	3	5	A0A0D9SF54; Q13813	A0A0D9SF54 [450-460]; Q13813 [450-460]	1	1369.8	0		20.2	31.6	72.4	763.4	32.1	164.8	100.6	7.5	72.1	109.6	84.3	240.7	97.7		1.7		1.2	Shared	Not Found	Peak Found	Peak Found	High	Peak Found	High	Peak Found	Peak Found	Peak Found	Peak Found	Peak Found	Peak Found	High	Peak Found	Not Found	Peak Found	Not Found
	FALSE	High	[R].AALLELWELR.[R]			2	3	11	A0A0D9SF54; Q13813	A0A0D9SF54 [450-459]; Q13813 [450-459]	0	1213.69	0	56.1	200.8	30.8	104.2	20	255.8	53.8	115.4	253.8	227.9		100.6	375.3		1.8			3.6	Shared	Peak Found	High	Peak Found	Peak Found	Peak Found	High	Peak Found	High	High	High	Not Found	High	High	Not Found	Peak Found	Not Found	Not Found
	FALSE	High	[R].AGTFQAFEQFGQQLLAHGHYASPEIK.[Q]			2	3	5	A0A0D9SF54; Q13813	A0A0D9SF54 [1372-1397]; Q13813 [1392-1417]	0	2875.42	0				595.2					111.3	128		12.9	935.8	13.6	0.7			2.5	Shared	Not Found	Not Found	Not Found	Peak Found	Not Found	Not Found	Not Found	Not Found	High	Peak Found	Not Found	Peak Found	High	Peak Found	Peak Found	Not Found	Not Found
	FALSE	High	[R].DCEQAENWMAAR.[E]	1xCarbamidomethyl [C2]		2	3	2	A0A0D9SF54; Q13813	A0A0D9SF54 [1433-1444]; Q13813 [1453-1464]	0	1480.59	0				1415.7					137.5				246.8						Shared	Not Found	Not Found	Not Found	High	Not Found	Not Found	Not Found	Not Found	Peak Found	Not Found	Not Found	Not Found	Peak Found	Not Found	Not Found	Not Found	Not Found
	FALSE	High	[K].DLIGVQNLLK.[K]			2	3	3	A0A0D9SF54; Q13813	A0A0D9SF54 [815-824]; Q13813 [815-824]	0	1112.67	0				371.7	263.3	175.7	79.2	153.1	232.7	56		65.9	155	37.9	112.4			97	Shared	Not Found	Not Found	Not Found	Peak Found	Peak Found	High	Peak Found	Peak Found	Peak Found	High	Not Found	Peak Found	Peak Found	Peak Found	Peak Found	Not Found	Not Found
	FALSE	High	[K].DLNSQADSLMTSSAFDTSQVK.[D]			2	3	4	A0A0D9SF54; Q13813	A0A0D9SF54 [1701-1721]; Q13813 [1716-1736]	0	2245.03	0				1248.3	279.1							110.4	162.2						Shared	Not Found	Not Found	Not Found	High	Peak Found	Not Found	Not Found	Not Found	Not Found	Not Found	Not Found	Peak Found	Peak Found	Not Found	Not Found	Not Found	Not Found
	FALSE	High	[R].DLMSWINGIR.[G]			2	3	5	A0A0D9SF54; Q13813	A0A0D9SF54 [1330-1339]; Q13813 [1350-1359]	0	1204.61	0				821.3		297.6			125.9	40.3			514.9						Shared	Not Found	Not Found	Not Found	High	Not Found	High	Not Found	Not Found	High	Peak Found	Not Found	Not Found	High	Not Found	Not Found	Not Found	Not Found
	FALSE	High	[R].DLAALGDKVNSLGETAER.[L]	1xPhospho [S11]	A0A0D9SF54 1xPhospho [S1271]; Q13813 1xPhospho [S1291]	2	3	2	A0A0D9SF54; Q13813	A0A0D9SF54 [1261-1278]; Q13813 [1281-1298]	1	1938.92	0			1065.9		503.6							122.3					108.1		Shared	Not Found	Not Found	High	Not Found	Peak Found	Not Found	Not Found	Not Found	Not Found	Not Found	Not Found	Peak Found	Not Found	Not Found	Not Found	Not Found	Peak Found
	FALSE	High	[R].DLAALGDKVNSLGETAER.[L]			2	3	22	A0A0D9SF54; Q13813	A0A0D9SF54 [1261-1278]; Q13813 [1281-1298]	1	1858.95	0	15.1	203	237.6	340.2	50.5		22.5	210.2		61.2			235.6	63.8	291.9	57.3	11		Shared	Peak Found	Peak Found	High	High	Peak Found	High	Peak Found	High	Peak Found	High	Not Found	Peak Found	High	Peak Found	High	Peak Found	Peak Found
	FALSE	High	[R].DLAALGDK.[V]			2	3	1	A0A0D9SF54; Q13813	A0A0D9SF54 [1261-1268]; Q13813 [1281-1288]	0	802.431	0		53.3	930.3	42.7			140.6	220.9		92					292.8	27.3			Shared	Not Found	Peak Found	Peak Found	Peak Found	Not Found	Not Found	Peak Found	Peak Found	Not Found	Peak Found	Not Found	Not Found	Not Found	Not Found	High	Peak Found	Not Found
	FALSE	High	[R].DLAALEDK.[V]			2	3	1	A0A0D9SF54; Q13813	A0A0D9SF54 [303-310]; Q13813 [303-310]	0	874.452	0		218.5	446.5	649.9	200.1			25	165.3	57.9					36.8				Shared	Not Found	Peak Found	Peak Found	High	Peak Found	Not Found	Not Found	Peak Found	Peak Found	Peak Found	Not Found	Not Found	Not Found	Not Found	Peak Found	Not Found	Not Found
	FALSE	High	[R].DLAALEDKVK.[A]			2	3	10	A0A0D9SF54; Q13813	A0A0D9SF54 [303-312]; Q13813 [303-312]	1	1101.62	0			13.2	294.4		0.8	33.4	106.2	5.6	31.3	6.3	73.4	232.9	2.4	338		120.9	541.3	Shared	Not Found	Not Found	Peak Found	High	Not Found	Peak Found	Peak Found	Peak Found	Peak Found	Peak Found	Peak Found	Peak Found	High	Peak Found	High	Not Found	Peak Found
	FALSE	High	[R].DLASVQALLR.[K]			2	3	7	A0A0D9SF54; Q13813	A0A0D9SF54 [286-295]; Q13813 [286-295]	0	1085.63	0																			No Quan Values	Not Found	Not Found	Not Found	High	High	Not Found	High	Peak Found	Peak Found	High	Not Found	High	Peak Found	Not Found	Peak Found	Not Found	Peak Found
	FALSE	High	[K].DLASVNNLLK.[K]			2	3	5	A0A0D9SF54; Q13813	A0A0D9SF54 [1674-1683]; Q13813 [1689-1698]	0	1086.62	0	10.7	251.1	38.3	348.8	283	125.9	36.9		209.3	30.1		57	35.1		9.7	70.8	44	249.3	Shared	Peak Found	High	Peak Found	Peak Found	Peak Found	High	Peak Found	Not Found	Peak Found	Peak Found	Not Found	High	Peak Found	Not Found	Peak Found	Peak Found	Peak Found
	FALSE	High	[K].ASAFNSWFENAEEDLTDPVR.[C]			2	3	10	A0A0D9SF54; Q13813	A0A0D9SF54 [2085-2104]; Q13813 [2100-2119]	0	2298.03	0				497.2		71.8			156.1	140.8	451.5		288.7					193.9	Shared	Not Found	Not Found	Not Found	High	Not Found	High	Not Found	Not Found	High	Peak Found	Peak Found	Not Found	High	Not Found	Not Found	Not Found	Not Found
	FALSE	High	[R].CNSLEEIK.[A]	1xCarbamidomethyl [C1]		2	3	1	A0A0D9SF54; Q13813	A0A0D9SF54 [2105-2112]; Q13813 [2120-2127]	0	992.472	0		54.6	576.6		239.6		91.3	174.7		68.2	113	29.3		59.6	393				Shared	Not Found	Peak Found	Peak Found	Not Found	Peak Found	Not Found	Peak Found	High	Not Found	Peak Found	Peak Found	Peak Found	Not Found	Peak Found	Peak Found	Not Found	Not Found
	FALSE	High	[R].DADETKEWIEEK.[N]			2	3	12	A0A0D9SF54; Q13813	A0A0D9SF54 [1221-1232]; Q13813 [1241-1252]	1	1492.68	0			86.1	301.8	203.7	80.5	35.3	23.1	44.9	137		163.9	316.3	65	62.7		152.4	127.1	Shared	Not Found	Not Found	Peak Found	High	Peak Found	Peak Found	Peak Found	Peak Found	High	Peak Found	Not Found	High	High	Peak Found	High	Not Found	Peak Found
	FALSE	High	[K].CTELNQAWSSLGK.[R]	1xCarbamidomethyl [C1]		2	3	6	A0A0D9SF54; Q13813	A0A0D9SF54 [1294-1306]; Q13813 [1314-1326]	0	1493.71	0				963.2					211.2				625.6						Shared	Not Found	Not Found	Not Found	High	Not Found	Not Found	Not Found	Not Found	High	Not Found	Not Found	Not Found	High	Not Found	Not Found	Not Found	Not Found
	FALSE	High	[R].LAQFVEHWK.[E]			2	3	2	A0A0D9SF54; Q13813	A0A0D9SF54 [1830-1838]; Q13813 [1845-1853]	0	1157.61	0				124.6				19.4		26.1	853.4		98.1	26.7	420.6	27.1	161.1	42.9	Shared	Not Found	Not Found	Not Found	Peak Found	Not Found	Not Found	Not Found	Peak Found	Not Found	Peak Found	Peak Found	Not Found	High	Peak Found	Peak Found	Peak Found	Peak Found
	FALSE	High	[R].LEAELAAHEPAIQGVLDTGKK.[L]			2	3	1	A0A0D9SF54; Q13813	A0A0D9SF54 [1794-1814]; Q13813 [1809-1829]	1	2190.18	0				613.1			72.6	200.9	60.2	23.2		123.5	168.9		254.7			282.9	Shared	Not Found	Not Found	Not Found	High	Not Found	Not Found	Peak Found	Peak Found	Peak Found	Peak Found	Not Found	Peak Found	Peak Found	Not Found	Peak Found	Not Found	Not Found
	FALSE	High	[K].IEDLGAAMEEALILDNK.[Y]			2	3	2	A0A0D9SF54; Q13813	A0A0D9SF54 [2250-2266]; Q13813 [2265-2281]	0	1844.93	0				908				183.5					330		112.5		266		Shared	Not Found	Not Found	Not Found	High	Not Found	Not Found	Not Found	Peak Found	Not Found	Not Found	Not Found	Not Found	Peak Found	Not Found	Peak Found	Not Found	Peak Found
	FALSE	High	[R].IDGITIQAR.[Q]			2	3	8	A0A0D9SF54; Q13813	A0A0D9SF54 [734-742]; Q13813 [734-742]	0	986.563	0		288.2		434.3	125.2		76.8	112.2	165.2	54.6		110.3	187.4		184.6		60.3	0.9	Shared	Not Found	High	Peak Found	High	Peak Found	High	Peak Found	Peak Found	Peak Found	Peak Found	Not Found	Peak Found	High	Peak Found	Peak Found	Not Found	Peak Found
	FALSE	High	[K].LDILDQER.[A]			2	3	5	A0A0D9SF54; Q13813	A0A0D9SF54 [1400-1407]; Q13813 [1420-1427]	0	1001.53	0				377.3	65.9	47.4	113.3	89.6	153	65.6			120.4	9.7	375.7		59.7	322.5	Shared	Not Found	Not Found	Not Found	High	Peak Found	Peak Found	Peak Found	Peak Found	Peak Found	Peak Found	Not Found	Not Found	Peak Found	Peak Found	High	Not Found	Peak Found
	FALSE	High	[K].LDETGNLMISEGHFASETIR.[T]	1xOxidation [M8]		2	4	2	A0A0D9SF54; Q13813	A0A0D9SF54 [102-121]; Q13813 [102-121]	0	2236.06	0							625.4	641.9				532.7							Shared	Not Found	Not Found	Not Found	Not Found	Not Found	Not Found	Peak Found	High	Not Found	Not Found	Not Found	Peak Found	Not Found	Not Found	Not Found	Not Found	Not Found
	FALSE	High	[K].LDETGNLMISEGHFASETIR.[T]			2	4	2	A0A0D9SF54; Q13813	A0A0D9SF54 [102-121]; Q13813 [102-121]	0	2220.06	0				1169.6			87.2		340				203.3						Shared	Not Found	Not Found	Not Found	High	Not Found	Not Found	Peak Found	Not Found	Peak Found	Not Found	Not Found	Not Found	Peak Found	Not Found	Not Found	Not Found	Not Found
	FALSE	High	[K].LDENSAFLQFNWK.[A]			2	4	8	A0A0D9SF54; Q13813	A0A0D9SF54 [1957-1969]; Q13813 [1972-1984]	0	1611.78	0	29	33.4		527.6		41.4	31.6	95.3	142.4	310.3	160.6	15.3	211.7	15.5	2.9	79.4	24.8	78.8	Shared	Peak Found	Peak Found	Not Found	Peak Found	Not Found	High	Peak Found	Peak Found	High	High	Peak Found	Peak Found	High	Peak Found	Peak Found	Peak Found	Peak Found
	FALSE	High	[K].KLSDDNTIGKEEIQQR.[L]			2	3	6	A0A0D9SF54; Q13813	A0A0D9SF54 [1814-1829]; Q13813 [1829-1844]	2	1873.96	0	879.9	2.7	44.1	12.7	6.8		2.2	19.5	4.2	1.7	65.8	15.5	17.9	14.9	391.4	242	77.6	1.1	Shared	Peak Found	Peak Found	Peak Found	High	Peak Found	Not Found	Peak Found	Peak Found	High	High	Peak Found	Peak Found	High	Peak Found	Peak Found	Peak Found	Peak Found
	FALSE	High	[K].KLLVGSEDYGR.[D]			2	3	2	A0A0D9SF54; Q13813	A0A0D9SF54 [1769-1779]; Q13813 [1784-1794]	1	1236.66	0			198.4	472.8	115	135.9	110.8	143.3	52.6	82.2		127.8	70.5		60			230.6	Shared	Not Found	Not Found	Peak Found	Peak Found	Peak Found	Peak Found	Peak Found	Peak Found	Peak Found	Peak Found	Not Found	High	Peak Found	Not Found	Peak Found	Not Found	Not Found
	FALSE	High	[K].KLLEATELK.[G]			2	3	5	A0A0D9SF54; Q13813	A0A0D9SF54 [662-670]; Q13813 [662-670]	1	1044.63	0			618.1	118.6	196.2		162.7	318.7		126.3		169	26.6	21.2			30.2	12.4	Shared	Peak Found	High	Peak Found	Peak Found	Peak Found	Peak Found	High	Peak Found	Peak Found	Peak Found	Not Found	High	Peak Found	Peak Found	Not Found	Not Found	Peak Found
	FALSE	High	[K].KLLEAQSHFR.[K]			2	4	1	A0A0D9SF54; Q13813	A0A0D9SF54 [2063-2072]; Q13813 [2078-2087]	1	1228.68	0		141.8	43.1	211.8			143.1	273.4		112	149.5	309.2	361.8		54.1				Shared	Not Found	Peak Found	Peak Found	Peak Found	Not Found	Not Found	Peak Found	Peak Found	Not Found	Peak Found	Peak Found	Peak Found	High	Not Found	Peak Found	Not Found	Not Found
	FALSE	High	[K].KHEAFETDFTVHKDR.[V]			2	3	3	A0A0D9SF54; Q13813	A0A0D9SF54 [1896-1910]; Q13813 [1911-1925]	2	1859.9	0	18.1		145.4	240.4		160.8	14.4	19.9	16.5				651.3	509.4	2.2		21.8		Shared	Peak Found	Not Found	Peak Found	High	Not Found	High	Peak Found	Peak Found	Peak Found	Not Found	Not Found	Not Found	High	Peak Found	Peak Found	Not Found	Peak Found
	FALSE	High	[K].KHEAFETDFTVHK.[D]			2	3	4	A0A0D9SF54; Q13813	A0A0D9SF54 [1896-1908]; Q13813 [1911-1923]	1	1588.78	0		51.3	84.5	466.8		366.4	92.7		41.8	27.4		7.1	372.9		41.7		247.4		Shared	Not Found	Peak Found	Peak Found	High	Not Found	Peak Found	Peak Found	Not Found	Peak Found	Peak Found	Not Found	Peak Found	High	Not Found	Peak Found	Not Found	Peak Found
	FALSE	High	[K].KHALLEADVAAHQDR.[I]			2	3	1	A0A0D9SF54; Q13813	A0A0D9SF54 [719-733]; Q13813 [719-733]	1	1673.87	0				310.6			33.3		146.3	39.7		259.6	650.1	360.4					Shared	Not Found	Not Found	Not Found	High	Not Found	Not Found	Peak Found	Not Found	Peak Found	Peak Found	Not Found	Peak Found	Peak Found	Peak Found	Not Found	Not Found	Not Found
	FALSE	High	[K].KHEALMSDLSAYGSSIQALR.[E]			2	3	2	A0A0D9SF54; Q13813	A0A0D9SF54 [931-950]; Q13813 [931-950]	1	2177.1	0				1039.7					206.7	106.9			446.7						Shared	Not Found	Not Found	Not Found	High	Not Found	Not Found	Not Found	Not Found	Peak Found	Peak Found	Not Found	Not Found	High	Not Found	Not Found	Not Found	Not Found
	FALSE	High	[K].KHQLLEADISAHEDR.[L]			2	3	3	A0A0D9SF54; Q13813	A0A0D9SF54 [1684-1698]; Q13813 [1699-1713]	1	1761.89	0		43.5		416.9	20	210.1							441	19.5	138.7			510.3	Shared	Not Found	Peak Found	Not Found	High	Peak Found	High	Not Found	Not Found	Not Found	Not Found	Not Found	Not Found	High	Peak Found	Peak Found	Not Found	Not Found
	FALSE	High	[K].KHQALQAEIAGHEPR.[I]			2	3	5	A0A0D9SF54; Q13813	A0A0D9SF54 [825-839]; Q13813 [825-839]	1	1684.89	0				418.1		212	37.2	21	52.7	47.4		114.8	687.4		24.9		69	115.5	Shared	Not Found	Not Found	Not Found	High	Not Found	High	Peak Found	Peak Found	High	Peak Found	Not Found	Peak Found	High	Not Found	Peak Found	Not Found	Peak Found
	FALSE	High	[K].KHQLLEADISAHEDRLK.[D]			2	3	1	A0A0D9SF54; Q13813	A0A0D9SF54 [1684-1700]; Q13813 [1699-1715]	2	2003.07	0				241.1									1558.9						Shared	Not Found	Not Found	Not Found	Peak Found	Not Found	Not Found	Not Found	Not Found	Not Found	Not Found	Not Found	Not Found	High	Not Found	Not Found	Not Found	Not Found
	FALSE	High	[K].KIEDLGAAMEEALILDNK.[Y]	1xOxidation [M9]		2	3	1	A0A0D9SF54; Q13813	A0A0D9SF54 [2249-2266]; Q13813 [2264-2281]	1	1989.02	0							590	1210											Shared	Not Found	Not Found	Not Found	Not Found	Not Found	Not Found	Peak Found	High	Not Found	Not Found	Not Found	Not Found	Not Found	Not Found	Not Found	Not Found	Not Found
	FALSE	High	[K].KIEDLGAAMEEALILDNK.[Y]			2	3	3	A0A0D9SF54; Q13813	A0A0D9SF54 [2249-2266]; Q13813 [2264-2281]	1	1973.03	0			36.5	940.2	47.3			50.2	144	118		20.5	268.8		80.2	76.1	18.2		Shared	Not Found	Not Found	Peak Found	High	Peak Found	Not Found	Not Found	Peak Found	High	Peak Found	Not Found	Peak Found	Peak Found	Not Found	Peak Found	Peak Found	Peak Found
	FALSE	High	[K].KLDPAQSASRENLLEEQGSIALR.[Q]	1xPhospho [S]	A0A0D9SF54 1xPhospho [S]; Q13813 1xPhospho [S]	2	3	10	A0A0D9SF54; Q13813	A0A0D9SF54 [1023-1045]; Q13813 [1023-1045]	2	2605.3	0								17.5		571.7		507		469.5			234.3		Shared	Not Found	Not Found	Not Found	Not Found	Not Found	Not Found	Not Found	Peak Found	Not Found	High	Not Found	High	Not Found	High	Not Found	Not Found	Peak Found
	FALSE	High	[R].LAALADQWQFLVQK.[S]			2	3	9	A0A0D9SF54; Q13813	A0A0D9SF54 [1618-1631]; Q13813 [1633-1646]	0	1630.9	0			77.4	292.4	74.3	56.8	80.1	128	75.3	34.7	519.5	131.9	275.6		0.7		22.2	31	Shared	Not Found	Not Found	Peak Found	Peak Found	High	High	Peak Found	High	High	Peak Found	Peak Found	Peak Found	High	Not Found	Peak Found	Not Found	Peak Found
	FALSE	High	[K].IAALQAFADQLIAAGHYAK.[G]			2	3	24	A0A0D9SF54; Q13813	A0A0D9SF54 [1481-1499]; Q13813 [1501-1519]	0	1972.07	0		40.9	14	285.2	9.5	214.7	133.9	279.6	158.3	2.6	31.4	22.8	520.8	12.3	1.7	3.3	5.1	63.8	Shared	Peak Found	High	Peak Found	High	High	High	High	High	High	Peak Found	Peak Found	High	High	Peak Found	High	Peak Found	Peak Found
	FALSE	High	[R].KVEDLFLTFAK.[K]			2	3	10	A0A0D9SF54; Q13813	A0A0D9SF54 [2073-2083]; Q13813 [2088-2098]	1	1310.74	0				603			125.7	218.7	135.5	154.3		170.7	290.6		81.2		20.2		Shared	Not Found	Not Found	Not Found	High	Not Found	Not Found	Peak Found	High	High	Peak Found	Not Found	High	High	Not Found	Peak Found	Not Found	Peak Found
	FALSE	High	[R].LKGLALQR.[Q]			2	3	2	A0A0D9SF54; Q13813	A0A0D9SF54 [240-247]; Q13813 [240-247]	1	898.583	0			444.9		128		157.3	570.7		126.3		329					43.8		Shared	Not Found	Not Found	Peak Found	Not Found	Peak Found	Not Found	High	High	Not Found	Peak Found	Not Found	Peak Found	Not Found	Not Found	Not Found	Not Found	Peak Found
	FALSE	High	[R].LKDLNSQADSLMTSSAFDTSQVK.[D]			2	3	4	A0A0D9SF54; Q13813	A0A0D9SF54 [1699-1721]; Q13813 [1714-1736]	1	2486.21	0		374.6	270.3	590.6	252.2				62.9	44.4			140.3		36.4		28.4		Shared	Not Found	Peak Found	Peak Found	High	Peak Found	Not Found	Not Found	Not Found	Peak Found	Peak Found	Not Found	Not Found	High	Not Found	Peak Found	Not Found	Peak Found
	FALSE	High	[K].LIDVNHYAKDEVAAR.[M]			2	3	2	A0A0D9SF54; Q13813	A0A0D9SF54 [638-652]; Q13813 [638-652]	1	1713.89	0				535.4			38.4	96.3		75.4		82	888		45.1		39.3		Shared	Not Found	Not Found	Not Found	High	Not Found	Not Found	Peak Found	Peak Found	Not Found	Peak Found	Not Found	Peak Found	High	Not Found	Peak Found	Not Found	Peak Found
	FALSE	High	[K].LIDVNHYAK.[D]			2	3	4	A0A0D9SF54; Q13813	A0A0D9SF54 [638-646]; Q13813 [638-646]	0	1072.58	0	25.2	131.8	265.4	371.5	92.4		96.2	137.4	20.4	68.4		122.5	24.7	35.9	117.9	9.5	38.3	242.5	Shared	Peak Found	High	Peak Found	Peak Found	Peak Found	Not Found	High	High	Peak Found	Peak Found	Not Found	Peak Found	Peak Found	Peak Found	Peak Found	Peak Found	Peak Found
	FALSE	High	[K].LLEATELK.[G]			2	3	6	A0A0D9SF54; Q13813	A0A0D9SF54 [663-670]; Q13813 [663-670]	0	916.535	0		9.5	30.2	346.5	131.4	6.2	64.9	133.6	94.8	79.7		108.1	84.3	3.1	318.2		62.8	326.9	Shared	Not Found	Peak Found	Peak Found	High	Peak Found	Peak Found	Peak Found	Peak Found	High	Peak Found	Not Found	Peak Found	High	Peak Found	High	Not Found	Peak Found
	FALSE	High	[K].LLEAQSHFR.[K]			2	4	19	A0A0D9SF54; Q13813	A0A0D9SF54 [2064-2072]; Q13813 [2079-2087]	0	1100.58	0	14.2	224.9	252.8	233.3	60		101.5	259.1	27.7	89.2	19.4	158.8	127.6	10	109.8		18	93.8	Shared	Peak Found	High	High	High	High	High	High	High	Peak Found	High	Peak Found	High	High	Peak Found	High	Not Found	Peak Found
	FALSE	High	[K].LFGAAEVQR.[F]			2	3	11	A0A0D9SF54; Q13813	A0A0D9SF54 [251-259]; Q13813 [251-259]	0	990.537	1			202.9	74.9	534.6	28.8	13.6	51.4	103.1	151.2		49.7	164.8		115.9	231.4	8.2	69.5	Shared	Not Found	Not Found	High	Peak Found	Peak Found	High	Peak Found	High	Peak Found	Peak Found	Not Found	Peak Found	High	Not Found	High	Peak Found	Peak Found
	FALSE	High	[K].LGESQTLQQFSR.[D]			2	3	23	A0A0D9SF54; Q13813	A0A0D9SF54 [1527-1538]; Q13813 [1547-1558]	0	1393.71	0		67.6	33.1	240	113.2	64.9	72.1	162.1	186.4	64.6	103.9	93.7	159.1	16.9	169.1	3.2	38.9	211.3	Shared	Not Found	High	High	High	High	High	High	High	High	High	Peak Found	High	High	Peak Found	High	Peak Found	High
	FALSE	High	[K].GEIDAHEDSFK.[S]			2	3	4	A0A0D9SF54; Q13813	A0A0D9SF54 [408-418]; Q13813 [408-418]	0	1247.55	0		48.8	188.5	380.5	96.8	69.6	77.5	84.1	130.2	110	23.2	38	26.2	126	59.6	166.2	124.3	50.6	Shared	Not Found	Peak Found	High	Peak Found	Peak Found	High	Peak Found	High	Peak Found	Peak Found	Peak Found	Peak Found	Peak Found	Peak Found	Peak Found	Peak Found	Peak Found
	FALSE	High	[R].GLVSSDELAKDVTGAEALLER.[H]			2	3	17	A0A0D9SF54; Q13813	A0A0D9SF54 [1340-1360]; Q13813 [1360-1380]	1	2173.13	0	42.8			138.9	31.5	175.1	37.1	170.4		26.6	82.4		594	43.9	447			10.1	Shared	Peak Found	Not Found	Not Found	High	Peak Found	High	Peak Found	High	Not Found	Peak Found	Peak Found	Not Found	High	Peak Found	High	Not Found	Not Found
	FALSE	High	[R].GLVSSDELAK.[D]			2	3	6	A0A0D9SF54; Q13813	A0A0D9SF54 [1340-1349]; Q13813 [1360-1369]	0	1018.54	0		143.3	83.4	796.1	113.5	1.2	48.6	76.7		46.9		57.9	76.1		220.3	56.8	57.7	21.5	Shared	Not Found	High	Peak Found	High	Peak Found	Peak Found	Peak Found	High	Not Found	Peak Found	Not Found	Peak Found	Peak Found	Not Found	Peak Found	Peak Found	Peak Found
	FALSE	High	[R].GKDLIGVQNLLKK.[H]			2	3	2	A0A0D9SF54; Q13813	A0A0D9SF54 [813-825]; Q13813 [813-825]	2	1425.88	0				599		92.3		109.4		88.9			580.6		329.8				Shared	Not Found	Not Found	Not Found	Peak Found	Not Found	High	Not Found	Peak Found	Not Found	Peak Found	Not Found	Not Found	High	Not Found	Peak Found	Not Found	Not Found
	FALSE	High	[R].GKDLIGVQNLLK.[K]			2	3	12	A0A0D9SF54; Q13813	A0A0D9SF54 [813-824]; Q13813 [813-824]	1	1297.78	0			171.7	482.5		72.7	46	158.6	305.6	39.2	16.5		274.1		67.7	58.9	3.6	102.7	Shared	Not Found	Not Found	High	Peak Found	Not Found	High	High	High	High	High	Peak Found	Not Found	High	Not Found	Peak Found	Peak Found	Peak Found
	FALSE	High	[R].FQFFQR.[D]			2	4	2	A0A0D9SF54; Q13813	A0A0D9SF54 [46-51]; Q13813 [46-51]	0	872.441	0				578.1	56.8	185.8	40.8	97.8	263.6	77.6		75.7	386.2	13.1	17.8		6.7		Shared	Not Found	Not Found	Not Found	Peak Found	Peak Found	High	Peak Found	Peak Found	High	Peak Found	Not Found	Peak Found	Peak Found	Peak Found	Peak Found	Not Found	Peak Found
	FALSE	High	[R].FNRDVDETISWIK.[E]			2	3	4	A0A0D9SF54; Q13813	A0A0D9SF54 [260-272]; Q13813 [260-272]	1	1622.82	0				779.2		79.9							884					56.9	Shared	Not Found	Not Found	Not Found	Peak Found	Not Found	Peak Found	Not Found	Not Found	Not Found	Not Found	Not Found	Not Found	High	Not Found	Not Found	Not Found	Not Found
	FALSE	High	[K].GDILTLLNSTNKDWWK.[V]			2	3	2	A0A0D9SF54; Q13813	A0A0D9SF54 [991-1006]; Q13813 [991-1006]	1	1903.99	0																			No Quan Values	Not Found	Not Found	Not Found	Not Found	Not Found	Not Found	Not Found	Not Found	Not Found	Not Found	Not Found	Not Found	High	Not Found	Not Found	Not Found	Not Found
	FALSE	High	[K].HQALQAEIAGHEPR.[I]			2	3	11	A0A0D9SF54; Q13813	A0A0D9SF54 [826-839]; Q13813 [826-839]	0	1556.79	0				389.6	9.5	176.7	62.1	103.5	100.3	49.1	12.1	95.2	446	5.2	188.8		38.1	123.7	Shared	Not Found	Not Found	Not Found	High	Peak Found	High	Peak Found	Peak Found	High	Peak Found	Peak Found	High	High	Peak Found	High	Not Found	Peak Found
	FALSE	High	[K].HQAFEAEVQANSGAIVK.[L]			2	4	5	A0A0D9SF54; Q13813	A0A0D9SF54 [85-101]; Q13813 [85-101]	0	1798.91	0			705.9	165.7		38.7	14.8	21.9	63.5	86.6		322	62.1		47.2		44.9	226.7	Shared	Not Found	Not Found	High	High	Not Found	Peak Found	Peak Found	Peak Found	Peak Found	Peak Found	Not Found	High	Peak Found	Not Found	Peak Found	Not Found	Peak Found
	FALSE	High	[K].HQAFEAELSANQSR.[I]			2	3	6	A0A0D9SF54; Q13813	A0A0D9SF54 [614-627]; Q13813 [614-627]	0	1587.75	0		7.3	548.9	166		125.7	35.7	302.5	8.8	46.3		180.8	70.8	12	49.2	92.9	7.7	145.5	Shared	Not Found	Peak Found	Peak Found	High	Not Found	Peak Found	Peak Found	High	Peak Found	Peak Found	Not Found	High	Peak Found	Peak Found	Peak Found	Peak Found	Peak Found
	FALSE	High	[K].HQAFEAELHANADR.[I]			2	3	17	A0A0D9SF54; Q13813	A0A0D9SF54 [1577-1590]; Q13813 [1592-1605]	0	1608.75	0	11			539.1		205.7	56.4	67.4	65.6	49		128	514.3	10.4	69.3	3.8		80.1	Shared	Peak Found	Not Found	Not Found	High	Not Found	High	High	High	High	Peak Found	Not Found	High	High	Peak Found	High	Peak Found	Not Found
	FALSE	High	[K].HQLLEADISAHEDR.[L]			2	3	8	A0A0D9SF54; Q13813	A0A0D9SF54 [1685-1698]; Q13813 [1700-1713]	0	1633.79	0		164.2	86.6	243.5			227.3	268.6		129.9	48.3	246.1	199.1	128			21.2	37.1	Shared	Not Found	Peak Found	Peak Found	Peak Found	Not Found	Not Found	Peak Found	High	Not Found	High	Peak Found	High	High	Peak Found	Not Found	Not Found	Peak Found
	FALSE	High	[R].HQEHKGEIDAHEDSFK.[S]			2	3	15	A0A0D9SF54; Q13813	A0A0D9SF54 [403-418]; Q13813 [403-418]	1	1906.87	0	319.2	1.5		662.5	60.8	145.7	1.2		23.6	19.2		6.3	516.8	0.7	2.3			40.3	Shared	Peak Found	Peak Found	Not Found	High	Peak Found	High	Peak Found	Not Found	High	High	Not Found	Peak Found	High	Peak Found	Peak Found	Not Found	Not Found
	FALSE	High	[K].KFEEFQTDMAAHEER.[V]			2	3	7	A0A0D9SF54; Q13813	A0A0D9SF54 [190-204]; Q13813 [190-204]	1	1867.83	0	57.5	552.4	81.8	623.5	61.8	61.7	4.9		84.2	38.3	14.2	7.8	109.8	32	11.6		30.6	28.1	Shared	Peak Found	Peak Found	Peak Found	High	Peak Found	High	Peak Found	Not Found	Peak Found	High	Peak Found	Peak Found	High	Peak Found	Peak Found	Not Found	Peak Found
	FALSE	High	[K].KGDILTLLNSTNK.[D]			2	3	10	A0A0D9SF54; Q13813	A0A0D9SF54 [990-1002]; Q13813 [990-1002]	1	1416.81	0	282	178.6		455.4	127.3	68	39.9	65.7	184.3	37.3		43.4	148.4	7.8	18.8		16.2	127	Shared	Peak Found	High	Not Found	High	Peak Found	Peak Found	Peak Found	Peak Found	High	Peak Found	Not Found	High	High	Peak Found	Peak Found	Not Found	Peak Found
	FALSE	High	[K].KGDILTLLNSTNKDWWK.[V]			2	3	6	A0A0D9SF54; Q13813	A0A0D9SF54 [990-1006]; Q13813 [990-1006]	2	2032.09	0			51.4	590.8	147.1	3.7			60	155.1		21.6	725		36.1	8.7		0.6	Shared	Not Found	Not Found	Peak Found	High	Peak Found	Peak Found	Not Found	Not Found	High	Peak Found	Not Found	Peak Found	High	Not Found	Peak Found	Peak Found	Not Found
	FALSE	High	[K].KASAFNSWFENAEEDLTDPVR.[C]			2	3	8	A0A0D9SF54; Q13813	A0A0D9SF54 [2084-2104]; Q13813 [2099-2119]	1	2426.13	0	138.6	95.7	191.2	272.4	470.5	39.7			30.4	23			245.4	55.9	10.9	220.3		6	Shared	Peak Found	Peak Found	Peak Found	High	Peak Found	High	Not Found	Not Found	High	High	Not Found	Not Found	High	Peak Found	Peak Found	Peak Found	Not Found
	FALSE	High	[K].GRELPTAFDYVEFTR.[S]			2	3	1	A0A0D9SF54; Q13813	A0A0D9SF54 [2438-2452]; Q13813 [2453-2467]	1	1800.89	0				1800															Shared	Not Found	Not Found	Not Found	High	Not Found	Not Found	Not Found	Not Found	Not Found	Not Found	Not Found	Not Found	Not Found	Not Found	Not Found	Not Found	Not Found
	FALSE	High	[K].GNAMVEEGHFAAEDVK.[A]			2	3	10	A0A0D9SF54; Q13813	A0A0D9SF54 [847-862]; Q13813 [847-862]	0	1703.77	0			410	670.3		30.2	51.5	16.4	106.1	52.4		46.5	198.6	12	50.5		102.1	53.3	Shared	Not Found	Not Found	Peak Found	High	Not Found	Peak Found	Peak Found	Peak Found	High	Peak Found	Not Found	Peak Found	High	Peak Found	Peak Found	Not Found	Peak Found
	FALSE	High	[K].GNAMVEEGHFAAEDVK.[A]	1xOxidation [M4]		2	3	1	A0A0D9SF54; Q13813	A0A0D9SF54 [847-862]; Q13813 [847-862]	0	1719.76	0																			No Quan Values	Not Found	Not Found	Not Found	Not Found	Not Found	Not Found	Not Found	High	Not Found	Not Found	Not Found	Not Found	Not Found	Not Found	Not Found	Not Found	Not Found
	FALSE	High	[K].HALLEADVAAHQDR.[I]			2	3	10	A0A0D9SF54; Q13813	A0A0D9SF54 [720-733]; Q13813 [720-733]	0	1545.78	0	240.7			514.2			104.7	108.5	157.3			183.6	378.6		55.4		57.1		Shared	Peak Found	Not Found	Not Found	High	Not Found	Not Found	High	High	Peak Found	Not Found	Not Found	High	High	Not Found	Peak Found	Not Found	Peak Found
	FALSE	High	[K].HEALMSDLSAYGSSIQALR.[E]			2	3	2	A0A0D9SF54; Q13813	A0A0D9SF54 [932-950]; Q13813 [932-950]	0	2049.01	0		572.8		122.2							932.6				172.4				Shared	Not Found	Peak Found	Not Found	High	Not Found	Not Found	Not Found	Not Found	Not Found	Not Found	Peak Found	Not Found	Not Found	Not Found	Peak Found	Not Found	Not Found
	FALSE	High	[K].HEAFETDFTVHKDR.[V]			2	3	1	A0A0D9SF54; Q13813	A0A0D9SF54 [1897-1910]; Q13813 [1912-1925]	1	1731.81	0			62.3	108.7	63.5	21.8		87.1		34.1		101.2	167.2					1154.1	Shared	Not Found	Not Found	Peak Found	Peak Found	Peak Found	Peak Found	Not Found	Peak Found	Not Found	Peak Found	Not Found	Peak Found	High	Not Found	Not Found	Not Found	Not Found
	FALSE	High	[R].GVIDMGNSLIER.[G]	1xOxidation [M5]		2	3	1	A0A0D9SF54; Q13813	A0A0D9SF54 [1593-1604]; Q13813 [1608-1619]	0	1319.66	0																			No Quan Values	Not Found	High	Not Found	Not Found	Not Found	Not Found	Not Found	Not Found	Not Found	Not Found	Not Found	Not Found	Not Found	Not Found	Not Found	Not Found	Not Found
	FALSE	High	[R].GVIDMGNSLIER.[G]			2	3	9	A0A0D9SF54; Q13813	A0A0D9SF54 [1593-1604]; Q13813 [1608-1619]	0	1303.67	0		22.3	9.2	1034.8	5.8	110.3	14.7		129	38.7		7.8	190.2		56.6	6.6	14.8	159.4	Shared	Not Found	Peak Found	Peak Found	High	Peak Found	High	Peak Found	Not Found	High	Peak Found	Not Found	Peak Found	High	Not Found	Peak Found	Peak Found	Peak Found
FALSE	High	Master Protein	A0A0D9SF54	Spectrin alpha chain, non-erythrocytic 1 OS=Homo sapiens OX=9606 GN=SPTAN1 PE=1 SV=1	0	966.219	71	167	1306	2	1	2457	282.7	5.34	34577	1812.92	163	138	0	7.9	735.4	81.1	187.8	62.7	52.1	42.6	76.1	90.3	40.2		68.1	51.2	4.2	124		21.6	154.7	1.54409e+07	1.42933e+09	1.57537e+08	3.65012e+08	1.21793e+08	1.01329e+08	8.27742e+07	1.47833e+08	1.75478e+08	7.80527e+07		1.32312e+08
	Checked	Confidence	Annotated Sequence	Modifications	Modifications in Master Proteins	# Protein Groups	# Proteins	# PSMs	Master Protein Accessions	Positions in Master Proteins	# Missed Cleavages	Theo. MH+ [Da]	# Razor Quan Results	Abundances (Scaled): F1: Sample	Abundances (Scaled): F2: Sample	Abundances (Scaled): F3: Sample	Abundances (Scaled): F4: Sample	Abundances (Scaled): F5: Sample	Abundances (Scaled): F6: Sample	Abundances (Scaled): F7: Sample	Abundances (Scaled): F8: Sample	Abundances (Scaled): F9: Sample	Abundances (Scaled): F10: Sample	Abundances (Scaled): F11: Sample	Abundances (Scaled): F12: Sample	Abundances (Scaled): F13: Sample	Abundances (Scaled): F14: Sample	Abundances (Scaled): F15: Sample	Abundances (Scaled): F16: Sample	Abundances (Scaled): F17: Sample	Abundances (Scaled): F18: Sample	Quan Info	Found in Sample: [S1] F1: Sample	Found in Sample: [S2] F2: Sample	Found in Sample: [S3] F3: Sample	Found in Sample: [S4] F4: Sample	Found in Sample: [S5] F5: Sample	Found in Sample: [S6] F6: Sample	Found in Sample: [S7] F7: Sample	Found in Sample: [S8] F8: Sample	Found in Sample: [S9] F9: Sample	Found in Sample: [S10] F10: Sample	Found in Sample: [S11] F11: Sample	Found in Sample: [S12] F12: Sample	Found in Sample: [S13] F13: Sample	Found in Sample: [S14] F14: Sample	Found in Sample: [S15] F15: Sample	Found in Sample: [S16] F16: Sample	Found in Sample: [S17] F17: Sample
	FALSE	High	[R].NVEDIELWLYEVEGHLASDDYGKDLTNVQNLQK.[K]			2	3	6	A0A0D9SF54; Q13813	A0A0D9SF54 [686-718]; Q13813 [686-718]	1	3847.87	0				612.3			151.6			485.7			178	357.7				14.6	Shared	Not Found	Not Found	Not Found	High	Not Found	Not Found	Peak Found	Not Found	Not Found	High	Not Found	Not Found	Peak Found	Peak Found	Not Found	Not Found	Not Found
	FALSE	High	[R].NVEDIELWLYEVEGHLASDDYGK.[D]			2	3	1	A0A0D9SF54; Q13813	A0A0D9SF54 [686-708]; Q13813 [686-708]	0	2694.26	0				211.3					110.4	962.6			515.7						Shared	Not Found	Not Found	Not Found	High	Not Found	Not Found	Not Found	Not Found	Peak Found	Peak Found	Not Found	Not Found	Peak Found	Not Found	Not Found	Not Found	Not Found
	FALSE	High	[R].NTTGVTEEALKEFSMMFK.[H]			2	3	5	A0A0D9SF54; Q13813	A0A0D9SF54 [2301-2318]; Q13813 [2316-2333]	1	2062.98	0				1038.3		26.2				8.5			727.1						Shared	Not Found	Not Found	Not Found	High	Not Found	Peak Found	Not Found	Not Found	Not Found	Peak Found	Not Found	Not Found	High	Not Found	Not Found	Not Found	Not Found
	FALSE	High	[R].NTTGVTEEALK.[E]			2	3	14	A0A0D9SF54; Q13813	A0A0D9SF54 [2301-2311]; Q13813 [2316-2326]	0	1162.6	1		404.8	331.3	120	122	1.6	73.7	81.5		52.1		17.4	2.3	19.2	226.6		44.2	303.1	Shared	Not Found	High	Peak Found	Peak Found	High	Peak Found	High	High	Not Found	High	Not Found	Peak Found	Peak Found	Peak Found	High	Not Found	Peak Found
	FALSE	High	[K].QKLDILDQER.[A]			2	3	16	A0A0D9SF54; Q13813	A0A0D9SF54 [1398-1407]; Q13813 [1418-1427]	1	1257.68	2	17.9	458.3	262	107.9	29.4	32.3	98.2	81.4	23.1	13.9	3.9	209.1	61.2	72.4	74.6		215.5	38.8	Shared	Peak Found	High	Peak Found	High	Peak Found	High	Peak Found	High	High	Peak Found	Peak Found	Peak Found	High	Peak Found	High	Not Found	Peak Found
	FALSE	High	[K].QEAFLLNEDLGDSLDSVEALLK.[K]			2	3	25	A0A0D9SF54; Q13813	A0A0D9SF54 [486-507]; Q13813 [486-507]	0	2419.22	0	17.5	98.7	80.8	153.2	81.7	46.4	144.9	295.3	34.4	18.5	182.2	176.3	31.2	84.8	85.1		148.4	120.5	Shared	Peak Found	High	Peak Found	High	High	High	High	High	High	High	Peak Found	High	High	High	Peak Found	Not Found	Peak Found
	FALSE	High	[R].QEFAQHANAFHQWIQETR.[T]			2	3	2	A0A0D9SF54; Q13813	A0A0D9SF54 [2193-2210]; Q13813 [2208-2225]	0	2241.06	0				651.7		98.8		364.1	270.5				414.9						Shared	Not Found	Not Found	Not Found	High	Not Found	Peak Found	Not Found	Peak Found	Peak Found	Not Found	Not Found	Not Found	Peak Found	Not Found	Not Found	Not Found	Not Found
	FALSE	High	[K].QDEVNAAWQR.[L]			2	3	10	A0A0D9SF54; Q13813	A0A0D9SF54 [230-239]; Q13813 [230-239]	0	1216.57	1			144.5	78.7	34.6	68.5	194.8	256.7		8.3		274.6	34.1	412.6	61.7		164.1	66.8	Shared	Not Found	Not Found	Peak Found	High	Peak Found	High	Peak Found	High	Not Found	Peak Found	Not Found	High	High	Peak Found	Peak Found	Not Found	Peak Found
	FALSE	High	[R].QFQDAGHFDAENIKK.[K]			2	3	1	A0A0D9SF54; Q13813	A0A0D9SF54 [743-757]; Q13813 [743-757]	1	1747.84	0				625.6			135.2	193.2	180.8	92.7		189.9	382.6						Shared	Not Found	Not Found	Not Found	High	Not Found	Not Found	Peak Found	Peak Found	Peak Found	Peak Found	Not Found	Peak Found	Peak Found	Not Found	Not Found	Not Found	Not Found
	FALSE	High	[R].QFQDAGHFDAENIK.[K]			2	3	4	A0A0D9SF54; Q13813	A0A0D9SF54 [743-756]; Q13813 [743-756]	0	1619.74	0																			No Quan Values	Not Found	Not Found	Not Found	High	Not Found	Not Found	Not Found	Not Found	Not Found	Not Found	Not Found	Not Found	High	Not Found	Not Found	Not Found	Not Found
	FALSE	High	[R].QGFVPAAYVK.[K]			2	3	5	A0A0D9SF54; Q13813	A0A0D9SF54 [1013-1022]; Q13813 [1013-1022]	0	1079.59	1	76.3	327.3	14.2	283.1	73.5	85.4	43.3	83	122.7	54	3.6	81.4	265.8	1.5	190.4	1.2	25.2	68	Shared	Peak Found	Peak Found	Peak Found	Peak Found	Peak Found	High	Peak Found	Peak Found	Peak Found	Peak Found	Peak Found	High	High	Peak Found	Peak Found	Peak Found	Peak Found
	FALSE	High	[K].QETFDAGLQAFQQEGIANITALKDQLLAAK.[H]			2	3	9	A0A0D9SF54; Q13813	A0A0D9SF54 [2003-2032]; Q13813 [2018-2047]	1	3232.68	0				308.3		113	29.3	321.5	46.2	31.2		278.8	445.9		139.9			85.8	Shared	Not Found	Not Found	Not Found	Peak Found	Not Found	High	Peak Found	High	High	Peak Found	Not Found	Peak Found	High	Not Found	High	Not Found	Not Found
	FALSE	High	[R].QEQIDNQYHSLLELGEK.[R]			1	1	6	A0A0D9SF54	A0A0D9SF54 [1046-1062]	0	2044	0		150.3	148.9	304.7	81.3	33.9	90.2	204.6	123.2	50.8		98.4	134.6	16.4	148		61.4	153.4		Not Found	High	Peak Found	High	Peak Found	Peak Found	Peak Found	Peak Found	Peak Found	Peak Found	Not Found	Peak Found	High	Peak Found	Peak Found	Not Found	Peak Found
	FALSE	High	[K].QETFDAGLQAFQQEGIANITALK.[D]			2	3	11	A0A0D9SF54; Q13813	A0A0D9SF54 [2003-2025]; Q13813 [2018-2040]	0	2493.26	0		267.5	106.2	86.9	98.1		187.4	185	14.5			453.8	14.6	239.1	18.4		121.7	6.7	Shared	Not Found	High	Peak Found	High	Peak Found	Not Found	Peak Found	High	High	Not Found	Not Found	High	High	Peak Found	Peak Found	Not Found	Peak Found
	FALSE	High	[K].NQALNTDNYGHDLASVQALQR.[K]			2	3	21	A0A0D9SF54; Q13813	A0A0D9SF54 [1233-1253]; Q13813 [1253-1273]	0	2328.13	0	37.2	100.2		382.3	35.3	70.5	103.2	151.2	86.3	63.4		178.4	221.5	94.9	100.3		87.4	87.6	Shared	Peak Found	High	Not Found	High	Peak Found	High	Peak Found	High	High	High	Not Found	High	High	Peak Found	Peak Found	Not Found	Peak Found
	FALSE	High	[K].SADESGQALLAAGHYASDEVR.[E]			2	3	24	A0A0D9SF54; Q13813	A0A0D9SF54 [419-439]; Q13813 [419-439]	0	2147	0	13.6	114.4	50.2	388.6	12.6	166	140.2	198.6	55.2	63.3		236.8	149.9	25.7	22.4		26.2	136.2	Shared	Peak Found	High	Peak Found	High	Peak Found	High	High	High	High	Peak Found	Not Found	High	High	Peak Found	Peak Found	Not Found	High
	FALSE	High	[R].RQDLEDSLQAQQYFADANEAESWMR.[E]			2	3	4	A0A0D9SF54; Q13813	A0A0D9SF54 [883-907]; Q13813 [883-907]	1	3001.34	0				1425					57	104.2			213.8						Shared	Not Found	Not Found	Not Found	High	Not Found	Not Found	Not Found	Not Found	Peak Found	Peak Found	Not Found	Not Found	High	Not Found	Not Found	Not Found	Not Found
	FALSE	High	[R].QQVAPTDDETGKELVLALYDYQEK.[S]			2	3	5	A0A0D9SF54; Q13813	A0A0D9SF54 [958-981]; Q13813 [958-981]	1	2753.35	0				252	60.7		171.4	344.9		214.8		488	219.3		48.8				Shared	Not Found	Not Found	Not Found	High	Peak Found	Not Found	Peak Found	Peak Found	Not Found	High	Not Found	Peak Found	High	Not Found	Peak Found	Not Found	Not Found
	FALSE	High	[K].RLEAELAAHEPAIQGVLDTGKK.[L]			2	3	5	A0A0D9SF54; Q13813	A0A0D9SF54 [1793-1814]; Q13813 [1808-1829]	2	2346.28	0	54.1	183	11.8	507.2	46.6		55.1	64.1	68.5	71.5		83	454.8	28	78.7		39.7	53.8	Shared	Peak Found	Peak Found	Peak Found	High	Peak Found	High	Peak Found	Peak Found	High	Peak Found	Not Found	High	High	Peak Found	Peak Found	Not Found	Peak Found
	FALSE	High	[K].RLEAELAAHEPAIQGVLDTGK.[K]			2	3	5	A0A0D9SF54; Q13813	A0A0D9SF54 [1793-1813]; Q13813 [1808-1828]	1	2218.18	0				439.4			120.7	337.2	186.4	167.2		135.7	302.3		90.8		20.4		Shared	Not Found	Not Found	Not Found	High	Not Found	Not Found	Peak Found	Peak Found	High	Peak Found	Not Found	Peak Found	High	Not Found	Peak Found	Not Found	Peak Found
	FALSE	High	[R].RAQLADSFHLQQFFR.[D]			2	3	2	A0A0D9SF54; Q13813	A0A0D9SF54 [566-580]; Q13813 [566-580]	1	1863.96	0		7.3		189.2			205	30.6	39.1	32.6		338.7	355		78.2		524.3		Shared	Not Found	Peak Found	Not Found	Peak Found	Not Found	Not Found	Peak Found	Peak Found	Peak Found	Peak Found	Not Found	Peak Found	High	Not Found	Peak Found	Not Found	Peak Found
	FALSE	High	[K].REELITNWEQIR.[T]			2	3	7	A0A0D9SF54; Q13813	A0A0D9SF54 [336-347]; Q13813 [336-347]	1	1586.83	1			195.1	771.1				11.7	152.4	141.6			456.5					71.6	Shared	Not Found	Not Found	Peak Found	High	Not Found	Not Found	Not Found	Peak Found	High	Peak Found	Not Found	Not Found	High	Not Found	Not Found	Not Found	Not Found
	FALSE	High	[K].LQIASDENYKDPTNLQGK.[L]			2	4	17	A0A0D9SF54; Q13813	A0A0D9SF54 [64-81]; Q13813 [64-81]	1	2034.01	0	125.6		64.1	291.8	211.6	83	78.9	134.6	67.1	97.9		138.4	117.1		70.3	7.6	42.9	269.2	Shared	Peak Found	Not Found	Peak Found	High	Peak Found	High	Peak Found	High	High	Peak Found	Not Found	High	High	Not Found	Peak Found	Peak Found	Peak Found
	FALSE	High	[R].LQQSHPLSATQIQVK.[R]			2	3	14	A0A0D9SF54; Q13813	A0A0D9SF54 [321-335]; Q13813 [321-335]	0	1677.93	0			316.2	400.4	83.9	107	61.9	121.6	115.3	57.1	10.6	93.4	147.5		58		27.6	199.4	Shared	Not Found	Not Found	High	High	Peak Found	High	High	High	High	Peak Found	Peak Found	Peak Found	High	Not Found	High	Not Found	Peak Found
	FALSE	High	[K].LQTASDESYKDPTNIQLSK.[L]			1	2	8	A0A0D9SF54	A0A0D9SF54 [1551-1569]	1	2138.06	0	10.7	937.2	57.7	147.5	56.2	58.4	26.2	31.7	78.9	36.5		57.6	22.4		115.7		7.9	155.2		Peak Found	Peak Found	Peak Found	High	Peak Found	High	Peak Found	Peak Found	High	High	Not Found	Peak Found	Peak Found	Not Found	High	Not Found	Peak Found
	FALSE	High	[K].LSDDNTIGKEEIQQR.[L]			2	3	21	A0A0D9SF54; Q13813	A0A0D9SF54 [1815-1829]; Q13813 [1830-1844]	1	1745.87	0		122.8	129.1	303.6	71.9	62.5	80.9	102.8	49.2	45.5		121.1	325	24.8	140.9		81.8	138.3	Shared	Not Found	Peak Found	Peak Found	High	High	High	High	High	High	High	Not Found	Peak Found	High	Peak Found	Peak Found	Not Found	Peak Found
	FALSE	High	[K].LLVGSEDYGR.[D]			2	3	9	A0A0D9SF54; Q13813	A0A0D9SF54 [1770-1779]; Q13813 [1785-1794]	0	1108.56	0		196.5	243.7	184.4	80.7	37.3	62.6	106.5	76.2	42.7		97.4	190.5	34.1	181.4			266.1	Shared	Not Found	High	High	Peak Found	Peak Found	High	High	Peak Found	Peak Found	High	Not Found	Peak Found	High	Peak Found	Peak Found	Not Found	Not Found
	FALSE	High	[K].LIQNNHYAMEDVATRR.[D]			2	3	1	A0A0D9SF54; Q13813	A0A0D9SF54 [533-548]; Q13813 [533-548]	1	1930.96	0				1533.5									266.5						Shared	Not Found	Not Found	Not Found	Peak Found	Not Found	Not Found	Not Found	Not Found	Not Found	Not Found	Not Found	Not Found	High	Not Found	Not Found	Not Found	Not Found
	FALSE	High	[K].LIQNNHYAMEDVATR.[R]	1xOxidation [M9]		2	3	2	A0A0D9SF54; Q13813	A0A0D9SF54 [533-547]; Q13813 [533-547]	0	1790.85	0							471.3	748.4				561.6					18.6		Shared	Not Found	Not Found	Not Found	Not Found	Not Found	Not Found	High	High	Not Found	Not Found	Not Found	Peak Found	Not Found	Not Found	Not Found	Not Found	Peak Found
	FALSE	High	[K].LIQNNHYAMEDVATR.[R]			2	3	1	A0A0D9SF54; Q13813	A0A0D9SF54 [533-547]; Q13813 [533-547]	0	1774.85	0																			No Quan Values	Peak Found	Not Found	Not Found	High	Not Found	Peak Found	Not Found	Not Found	Peak Found	Not Found	Not Found	Not Found	Peak Found	Not Found	Not Found	Not Found	Not Found
	FALSE	High	[K].LIQEQHPEEELIK.[T]			2	3	7	A0A0D9SF54; Q13813	A0A0D9SF54 [215-227]; Q13813 [215-227]	0	1605.85	0			810.4	161.6	53.2	47.8	67.1	25.8	87.8	32.9			52.7	13.7	321		36.2	89.8	Shared	Not Found	Not Found	High	High	Peak Found	Peak Found	Peak Found	Peak Found	Peak Found	Peak Found	Not Found	Not Found	High	Peak Found	Peak Found	Not Found	Peak Found
	FALSE	High	[R].LIQSHPESAEDLQEK.[C]			2	3	18	A0A0D9SF54; Q13813	A0A0D9SF54 [1279-1293]; Q13813 [1299-1313]	0	1723.85	0		126.7	29.3	489.8	78	5.8	67.6	134.1	89.9	53.4	17.8	87.6	258.2	26	275.1	6	37.4	17.3	Shared	Not Found	High	Peak Found	High	High	High	Peak Found	High	High	Peak Found	Peak Found	High	High	Peak Found	High	Peak Found	High
	FALSE	High	[R].LMVHTVATFNSIK.[E]			2	3	7	A0A0D9SF54; Q13813	A0A0D9SF54 [1177-1189]; Q13813 [1197-1209]	0	1460.79	0				1130.6					135.9	56.7			365.6					111.2	Shared	Not Found	Not Found	Not Found	High	Not Found	Not Found	Not Found	Not Found	Peak Found	Peak Found	Not Found	Not Found	High	Not Found	Not Found	Not Found	Not Found
	FALSE	High	[R].MQHNLEQQIQAR.[N]	1xOxidation [M1]		2	3	7	A0A0D9SF54; Q13813	A0A0D9SF54 [2289-2300]; Q13813 [2304-2315]	0	1511.74	0		124.2	301	22.9		171.5	92.9	385.1		1.1	18.6	180.6	3.4	123.3	105	92.5	49.8	128	Shared	Not Found	High	Peak Found	Peak Found	Not Found	Peak Found	High	High	Not Found	Peak Found	Peak Found	Peak Found	Peak Found	Peak Found	Peak Found	Peak Found	Peak Found
	FALSE	High	[R].MQHNLEQQIQAR.[N]			2	3	10	A0A0D9SF54; Q13813	A0A0D9SF54 [2289-2300]; Q13813 [2304-2315]	0	1495.74	0	20	27.8	55.6	534.5	59	65.7	15.5		93.4	29.5	36		136	2.7	529.2	32.6	33.2	129.3	Shared	Peak Found	Peak Found	Peak Found	High	Peak Found	High	Peak Found	Not Found	High	Peak Found	Peak Found	Not Found	High	Peak Found	Peak Found	Peak Found	Peak Found
	FALSE	High	[K].MTLVASEDYGDTLAAIQGLLKK.[H]			2	3	2	A0A0D9SF54; Q13813	A0A0D9SF54 [1875-1896]; Q13813 [1890-1911]	1	2337.24	0				1361.2		60.1			14.9				307.4				56.4		Shared	Not Found	Not Found	Not Found	High	Not Found	Peak Found	Not Found	Not Found	Peak Found	Not Found	Not Found	Not Found	Peak Found	Not Found	Not Found	Not Found	Peak Found
	FALSE	High	[K].MTLVASEDYGDTLAAIQGLLK.[K]	1xOxidation [M1]		2	3	14	A0A0D9SF54; Q13813	A0A0D9SF54 [1875-1895]; Q13813 [1890-1910]	0	2225.14	0		278.2	62	44.5		15	156.7	348.1	9	8		473.5	12.5	97.7	47.3		205.6	41.9	Shared	Not Found	Peak Found	Peak Found	High	Not Found	High	High	High	Peak Found	High	Not Found	Peak Found	High	Peak Found	Peak Found	Not Found	Peak Found
	FALSE	High	[K].MTLVASEDYGDTLAAIQGLLK.[K]			2	3	13	A0A0D9SF54; Q13813	A0A0D9SF54 [1875-1895]; Q13813 [1890-1910]	0	2209.14	0		113.2	36.1	355.9	186.7	101.9		57.6	91	94.8		52.2	357.6	44.9	60.3		190.3	57.6	Shared	Not Found	Peak Found	Peak Found	High	High	High	Not Found	High	Peak Found	High	Not Found	Peak Found	High	Peak Found	Peak Found	Not Found	High
	FALSE	High	[R].MMLDQCLELQLFHR.[D]	1xCarbamidomethyl [C6]		2	3	1	A0A0D9SF54; Q13813	A0A0D9SF54 [1419-1432]; Q13813 [1439-1452]	0	1833.88	0				1800															Shared	Not Found	Not Found	Not Found	High	Not Found	Not Found	Not Found	Not Found	Not Found	Not Found	Not Found	Not Found	Not Found	Not Found	Not Found	Not Found	Not Found
	FALSE	High	[R].MNEVISLWK.[K]			2	3	3	A0A0D9SF54; Q13813	A0A0D9SF54 [653-661]; Q13813 [653-661]	0	1119.59	0				1142.6					187.1				470.3						Shared	Not Found	Not Found	Not Found	High	Not Found	Not Found	Not Found	Not Found	Peak Found	Not Found	Not Found	Not Found	High	Not Found	Not Found	Not Found	Not Found
	FALSE	High	[K].ITALDEFATK.[L]			2	3	18	A0A0D9SF54; Q13813	A0A0D9SF54 [523-532]; Q13813 [523-532]	0	1108.59	0		132.4	185.8	378.1	62.4	79.1	31.8	65.5	116.1	33.3	7.1	44.5	225.8	20.8	151.3	12.7	15.9	237.4	Shared	Not Found	High	High	High	Peak Found	High	High	High	High	Peak Found	Peak Found	Peak Found	High	Peak Found	Peak Found	Peak Found	Peak Found
	FALSE	High	[K].LTVLSEER.[A]			2	3	14	A0A0D9SF54; Q13813	A0A0D9SF54 [442-449]; Q13813 [442-449]	0	946.52	0	18.7	211.2	361.7	321.7	107		63.2	120.9	23.5	58.5		57.2	18.9	17	172.6		1.1	246.9	Shared	Peak Found	High	Peak Found	High	Peak Found	Not Found	High	High	Peak Found	High	Not Found	High	Peak Found	Peak Found	High	Not Found	Peak Found
	FALSE	High	[K].VLETAEDIQER.[R]			2	5	18	A0A0D9SF54; Q13813	A0A0D9SF54 [8-18]; Q13813 [8-18]	0	1302.65	0			338.3	394.6	114.9		77.3	0.9	63.3	47.3	26.8	22.9	244.8	18.1	334.3	3.8	112.8		Shared	Not Found	High	High	High	High	Not Found	High	Peak Found	High	High	Peak Found	Peak Found	Peak Found	Peak Found	High	High	Peak Found
	FALSE	High	[K].VNSLGETAER.[L]			2	3	1	A0A0D9SF54; Q13813	A0A0D9SF54 [1269-1278]; Q13813 [1289-1298]	0	1075.54	0		522.4	371.5			56.6	195.6			66.5							136.4	451.2	Shared	Not Found	Peak Found	Peak Found	Not Found	Not Found	Peak Found	Peak Found	Not Found	Not Found	Peak Found	Not Found	Not Found	Not Found	Not Found	Not Found	Not Found	High
	FALSE	High	[R].VNEVNQFAAK.[L]			2	3	12	A0A0D9SF54; Q13813	A0A0D9SF54 [205-214]; Q13813 [205-214]	0	1119.58	0		339	380.9	136.8	180.9		94.2	171.9		62.5		169.4			195.4		69		Shared	Not Found	High	High	Peak Found	High	Not Found	Peak Found	High	Not Found	High	Not Found	Peak Found	Not Found	Not Found	High	Not Found	Peak Found
	FALSE	High	[R].VNDVCTNGQDLIK.[K]	1xCarbamidomethyl [C5]		2	3	7	A0A0D9SF54; Q13813	A0A0D9SF54 [1911-1923]; Q13813 [1926-1938]	0	1475.72	0			74.3	215.5	46.9	128.2	11.8		111.8	38.2		43	178.5	122	286.7		53.9	489.3	Shared	Not Found	Not Found	Peak Found	High	Peak Found	High	Peak Found	Not Found	High	Peak Found	Not Found	Peak Found	High	Peak Found	Peak Found	Not Found	Peak Found
	FALSE	High	[K].VAEDLESEGLMAEEVQAVQQQEVYGMMPR.[D]			2	3	2	A0A0D9SF54; Q13813	A0A0D9SF54 [1133-1161]; Q13813 [1153-1181]	0	3266.5	0				1800															Shared	Not Found	Not Found	Not Found	High	Not Found	Not Found	Not Found	Not Found	Not Found	Not Found	Not Found	Not Found	Not Found	Not Found	Not Found	Not Found	Not Found
	FALSE	High	[R].VASNPYTWFTMEALEETWR.[N]			2	3	4	A0A0D9SF54; Q13813	A0A0D9SF54 [2147-2165]; Q13813 [2162-2180]	0	2331.08	0				618.8						711.8			469.4						Shared	Not Found	Not Found	Not Found	High	Not Found	Not Found	Not Found	Not Found	Not Found	High	Not Found	Not Found	Peak Found	Not Found	Not Found	Not Found	Not Found
	FALSE	High	[R].YEALKEPMVAR.[K]			2	3	1	A0A0D9SF54; Q13813	A0A0D9SF54 [766-776]; Q13813 [766-776]	1	1306.68	0	20.8			1080	66.2			4.4	143.5	45.9		16	332	9.5	45.6		36.2		Shared	Peak Found	Not Found	Not Found	High	Peak Found	Not Found	Not Found	Peak Found	Peak Found	Peak Found	Not Found	Peak Found	Peak Found	Peak Found	Peak Found	Not Found	Peak Found
	FALSE	High	[K].YTEHSTVGLAQQWDQLDQLGMR.[M]			2	3	5	A0A0D9SF54; Q13813	A0A0D9SF54 [2267-2288]; Q13813 [2282-2303]	0	2576.22	0				1139.9					140.8	135.8			329.4		36.7		17.5		Shared	Not Found	Not Found	Not Found	High	Not Found	Not Found	Not Found	Not Found	High	Peak Found	Not Found	Not Found	Peak Found	Not Found	Peak Found	Not Found	Peak Found
	FALSE	High	[R].WSQLLANSAAR.[K]			2	3	13	A0A0D9SF54; Q13813	A0A0D9SF54 [2050-2060]; Q13813 [2065-2075]	0	1216.64	0		138.9		313.1	125.9	22.7	102	235.6		115.4		85.2	296.6	86.1	154.5		80.8	43.3	Shared	Not Found	High	Not Found	High	Peak Found	Peak Found	Peak Found	High	Not Found	High	Not Found	High	High	Peak Found	Peak Found	Not Found	Peak Found
	FALSE	High	[R].SSLSSAQADFNQLAELDR.[Q]			2	3	18	A0A0D9SF54; Q13813	A0A0D9SF54 [2123-2140]; Q13813 [2138-2155]	0	1951.94	0		195.2	83.8	123.1	161.6		57.1	219.1	36.8	125.5	174.1	151.5	89.9		65.7	71.8	113	131.6	Shared	Not Found	Peak Found	Peak Found	High	High	Not Found	High	High	High	Peak Found	Peak Found	Peak Found	High	Not Found	High	Peak Found	High
	FALSE	High	[K].SSEEIESAFR.[A]			2	4	13	A0A0D9SF54; Q13813	A0A0D9SF54 [2390-2399]; Q13813 [2405-2414]	0	1154.53	0	32.9	132.8	257.3	276.9	79.4	48.3	52.7	103	60.8	51.8	19.5	67.4	136.9	16	217.4	3.5	28	215.3	Shared	Peak Found	High	High	High	Peak Found	Peak Found	Peak Found	Peak Found	High	Peak Found	Peak Found	Peak Found	High	Peak Found	High	Peak Found	Peak Found
	FALSE	High	[R].SQLLGSAHEVQR.[F]			2	3	22	A0A0D9SF54; Q13813	A0A0D9SF54 [1206-1217]; Q13813 [1226-1237]	0	1324.7	0	15.4	187.8	236.5	81.6	70.1	35.8	151.4	303.7	50.6	56.9		163.7	52.7	23.6	128.3		12.3	229.7	Shared	Peak Found	High	High	High	High	High	Peak Found	High	Peak Found	High	Not Found	High	High	Peak Found	High	Not Found	Peak Found
	FALSE	High	[R].SLGYDLPMVEEGEPDPEFEAILDTVDPNR.[D]			2	3	2	A0A0D9SF54; Q13813	A0A0D9SF54 [2339-2367]; Q13813 [2354-2382]	0	3247.5	0				1561.8					238.2										Shared	Not Found	Not Found	Not Found	High	Not Found	Not Found	Not Found	Not Found	Peak Found	Not Found	Not Found	Not Found	Not Found	Not Found	Not Found	Not Found	Not Found
	FALSE	High	[R].SLQQLAEER.[S]			2	3	7	A0A0D9SF54; Q13813	A0A0D9SF54 [1197-1205]; Q13813 [1217-1225]	0	1073.56	0			312.5	388.2	181.9		63.7	113.3	101.1	52.4		68	199.6	25.3	229.4	12.4	52.3		Shared	Not Found	High	Peak Found	High	Peak Found	Not Found	Peak Found	Peak Found	Peak Found	Peak Found	Not Found	Peak Found	High	High	Peak Found	Peak Found	Peak Found
	FALSE	High	[R].SLQQLAEER.[S]	1xPhospho [S1]	A0A0D9SF54 1xPhospho [S1197]; Q13813 1xPhospho [S1217]	2	3	8	A0A0D9SF54; Q13813	A0A0D9SF54 [1197-1205]; Q13813 [1217-1225]	0	1153.52	0	123.6	929.8	467.6		80.3		31.8	13		10.8	26.7			81	10.3		25.1		Shared	Peak Found	High	High	Not Found	High	Not Found	Peak Found	High	Not Found	Peak Found	Peak Found	Not Found	Not Found	Peak Found	Peak Found	Not Found	Peak Found
	FALSE	High	[R].TYLLDGSCMVEESGTLESQLEATK.[R]	1xCarbamidomethyl [C8]		2	2	2	A0A0D9SF54; Q13813	A0A0D9SF54 [2211-2234]; Q13813 [2226-2249]	0	2661.23	0				439.3	1137.4					217								6.3	Shared	Not Found	Not Found	Not Found	High	Peak Found	Not Found	Not Found	Not Found	Not Found	Peak Found	Not Found	Not Found	Not Found	Not Found	Not Found	Not Found	Not Found
	FALSE	High	[K].TATDEAYKDPSNLQGK.[V]			2	3	17	A0A0D9SF54; Q13813	A0A0D9SF54 [595-610]; Q13813 [595-610]	1	1737.83	0	15.2	110.5	160.6	265.7	114.5	29.6	51.7	104.6	230.1	44	31.5	64.6	160.2	51.9	168.7		79.8	116.7	Shared	Peak Found	High	High	High	High	High	High	High	Peak Found	High	Peak Found	Peak Found	High	Peak Found	Peak Found	Not Found	Peak Found
	FALSE	High	[K].TKQDEVNAAWQR.[L]			2	3	15	A0A0D9SF54; Q13813	A0A0D9SF54 [228-239]; Q13813 [228-239]	1	1445.71	0	64.1	21.1	10.3	377.5	9.6	76	39.3	149.7	70.3	50.1	65.8	144.3	171.4	25.3	20.9	241.9	39.2	223.1	Shared	Peak Found	Peak Found	Peak Found	High	Peak Found	High	High	High	Peak Found	High	Peak Found	High	High	Peak Found	Peak Found	Peak Found	Peak Found
	FALSE	High	[K].EELYQNLTR.[E]			2	3	8	A0A0D9SF54; Q13813	A0A0D9SF54 [2412-2420]; Q13813 [2427-2435]	0	1165.58	1		47	257.1	306.8	102.1	1.4	54.4	63.2	219.3	43.6	29.8	43.2	132.1	29	184	9.6	38.4	239.1	Shared	Not Found	Peak Found	High	Peak Found	Peak Found	Peak Found	Peak Found	High	Peak Found	Peak Found	Peak Found	High	Peak Found	Peak Found	High	Peak Found	High
	FALSE	High	[R].EELITNWEQIR.[T]			2	3	6	A0A0D9SF54; Q13813	A0A0D9SF54 [337-347]; Q13813 [337-347]	0	1430.73	0				1028.5			43.2	42.2	191.4	144.9		74.5	225.5	49.9					Shared	Not Found	Not Found	Not Found	High	Peak Found	Peak Found	Peak Found	Peak Found	Peak Found	Peak Found	Not Found	Peak Found	High	Peak Found	Not Found	Not Found	Not Found
	FALSE	High	[K].EFSMMFK.[H]			2	3	2	A0A0D9SF54; Q13813	A0A0D9SF54 [2312-2318]; Q13813 [2327-2333]	0	919.405	0		11.9	21.3	1286.7					216.9	17.3	46.3		55.1		5.3	70.6		68.6	Shared	Not Found	Peak Found	Peak Found	High	Not Found	Not Found	Not Found	Not Found	Peak Found	Peak Found	Peak Found	Not Found	High	Not Found	Peak Found	Peak Found	Not Found
	FALSE	High	[R].ECEDVMDWINDKEAIVTSEELGQDLEHVEVLQK.[K]	1xCarbamidomethyl [C2]		2	3	3	A0A0D9SF54; Q13813	A0A0D9SF54 [157-189]; Q13813 [157-189]	1	3900.82	0			334.4	515.7	94.9					64.1	191.9		150.2	232.8	53.7	162.4			Shared	Not Found	Not Found	Peak Found	High	Peak Found	Not Found	Not Found	Not Found	Not Found	Peak Found	Peak Found	Not Found	High	Peak Found	Peak Found	Peak Found	Not Found
	FALSE	High	[R].EANELQQWINEK.[E]			2	3	5	A0A0D9SF54; Q13813	A0A0D9SF54 [1079-1090]; Q13813 [1099-1110]	0	1501.73	0			387.5		252.9	89.3	44.3	94.1	20.3	45.9	102.3	135.3	161.2	112.8	40		81.4	232.5	Shared	Not Found	Not Found	Peak Found	High	Peak Found	High	Peak Found	Peak Found	Peak Found	Peak Found	Peak Found	Peak Found	High	Peak Found	Peak Found	Not Found	Peak Found
	FALSE	High	[K].EAIVTSEELGQDLEHVEVLQK.[K]			2	3	6	A0A0D9SF54; Q13813	A0A0D9SF54 [169-189]; Q13813 [169-189]	0	2366.21	0	15		72	33	309.4		220.7	93.6	169	53.8	180.7	261.1	60.6	215.3			88.9	26.9	Shared	Peak Found	Not Found	Peak Found	Peak Found	Peak Found	Not Found	Peak Found	High	High	Peak Found	Peak Found	High	Peak Found	Peak Found	Not Found	Not Found	Peak Found
	FALSE	High	[K].EKEQLMASDDFGRDLASVQALLR.[K]			2	3	2	A0A0D9SF54; Q13813	A0A0D9SF54 [273-295]; Q13813 [273-295]	2	2592.31	0									228.5				1571.5						Shared	Not Found	Not Found	Not Found	Not Found	Not Found	Not Found	Not Found	Not Found	Peak Found	Not Found	Not Found	Not Found	High	Not Found	Not Found	Not Found	Not Found
	FALSE	High	[K].EKEQLMASDDFGR.[D]	1xOxidation [M6]		2	3	1	A0A0D9SF54; Q13813	A0A0D9SF54 [273-285]; Q13813 [273-285]	1	1541.69	0																			No Quan Values	Not Found	Peak Found	Peak Found	Peak Found	Not Found	Not Found	High	Peak Found	Not Found	Not Found	Not Found	Peak Found	Peak Found	Peak Found	Peak Found	Not Found	Not Found
	FALSE	High	[K].EKEQLMASDDFGR.[D]			2	3	3	A0A0D9SF54; Q13813	A0A0D9SF54 [273-285]; Q13813 [273-285]	1	1525.7	0		76.7	113.1	737.8		40.7	4.8		352.4	46.4			169.1	109.6	28.9	40	50.6	29.8	Shared	Not Found	Peak Found	Peak Found	High	Not Found	Peak Found	Peak Found	Not Found	Peak Found	Peak Found	Not Found	Not Found	High	Peak Found	Peak Found	Peak Found	Peak Found
	FALSE	High	[R].EKEPIVGSTDYGKDEDSAEALLK.[K]			2	3	7	A0A0D9SF54; Q13813	A0A0D9SF54 [908-930]; Q13813 [908-930]	2	2494.22	0				464.3	96.8		100.8	116.9	182	92.5		230.9	251.8	56.1	134.2		73.9		Shared	Not Found	Not Found	Not Found	High	Peak Found	Not Found	Peak Found	Peak Found	High	High	Not Found	Peak Found	High	Peak Found	Peak Found	Not Found	Peak Found
	FALSE	High	[R].EKEPIAASTNR.[G]			2	3	2	A0A0D9SF54; Q13813	A0A0D9SF54 [802-812]; Q13813 [802-812]	1	1215.63	0																			No Quan Values	Not Found	Not Found	Not Found	Not Found	Not Found	Peak Found	Not Found	Not Found	Not Found	Not Found	Not Found	Not Found	Not Found	Not Found	High	Not Found	Not Found
	FALSE	High	[R].DSDELKSWVNEK.[M]			2	3	6	A0A0D9SF54; Q13813	A0A0D9SF54 [581-592]; Q13813 [581-592]	1	1449.69	0			496.8	85		85.3	245.9			102.5	65.5	122.4	267.6	198.3		21.9	108.7		Shared	Not Found	Not Found	Peak Found	High	Not Found	High	Peak Found	Not Found	Not Found	Peak Found	Peak Found	Peak Found	High	Peak Found	Not Found	Peak Found	Peak Found
	FALSE	High	[R].DMDDEESWIKEK.[K]			2	3	1	A0A0D9SF54; Q13813	A0A0D9SF54 [1757-1768]; Q13813 [1772-1783]	1	1524.65	0				1049.9									750.1						Shared	Not Found	Not Found	Not Found	Peak Found	Not Found	Not Found	Not Found	Not Found	Not Found	Not Found	Not Found	Not Found	High	Not Found	Not Found	Not Found	Not Found
	FALSE	High	[R].DMDDEESWIK.[E]			2	3	2	A0A0D9SF54; Q13813	A0A0D9SF54 [1757-1766]; Q13813 [1772-1781]	0	1267.51	0				1590.7									209.3						Shared	Not Found	Not Found	Not Found	High	Not Found	Not Found	Not Found	Not Found	Not Found	Not Found	Not Found	Not Found	Peak Found	Not Found	Not Found	Not Found	Not Found
	FALSE	High	[K].DLTNVQNLQK.[K]			2	3	13	A0A0D9SF54; Q13813	A0A0D9SF54 [709-718]; Q13813 [709-718]	0	1172.63	0		313.2	250	278	114		45.6	46	185	0.6		85.7	83.9	43.1	78			276.7	Shared	Not Found	High	Peak Found	High	High	Not Found	High	Peak Found	High	Peak Found	Not Found	High	Peak Found	Peak Found	High	Not Found	Not Found
	FALSE	High	[R].DLTGVQNLR.[K]			2	3	12	A0A0D9SF54; Q13813	A0A0D9SF54 [1780-1788]; Q13813 [1795-1803]	0	1015.55	0	28.6	125.2	52.3	237.8	102.2	0.6	60	87.9	44.5	47.4	513.6	57.3	104.8	92.1	143.1	42.3	53.5	6.7	Shared	Peak Found	High	Peak Found	High	Peak Found	Peak Found	High	High	Peak Found	High	Peak Found	High	High	Peak Found	Peak Found	Peak Found	Peak Found
	FALSE	High	[R].DLSSVQTLLTK.[Q]			2	3	18	A0A0D9SF54; Q13813	A0A0D9SF54 [1992-2002]; Q13813 [2007-2017]	0	1204.68	0		4.9	77.8	482.9	94.8	56.4	44.8	97.9	167.2	42.6	29	54	317.7	18.2	141.8	2.7	36.9	130.6	Shared	Not Found	Peak Found	High	High	Peak Found	High	High	High	Peak Found	High	Peak Found	High	High	Peak Found	High	Peak Found	Peak Found
	FALSE	High	[R].DLTSWVTEMK.[A]			2	3	4	A0A0D9SF54; Q13813	A0A0D9SF54 [372-381]; Q13813 [372-381]	0	1209.58	0	11.5	8.7		1179					199.1	10.2			362.6	26				2.9	Shared	Peak Found	Peak Found	Not Found	High	Not Found	Not Found	Not Found	Not Found	Peak Found	Peak Found	Not Found	Not Found	High	Peak Found	Not Found	Not Found	Not Found
	FALSE	High	[K].EAALTSEEVGADLEQVEVLQK.[K]			2	3	16	A0A0D9SF54; Q13813	A0A0D9SF54 [1091-1111]; Q13813 [1111-1131]	0	2258.14	0		3	227.1	10.9	363.1		218.6	172.3	6.5	26.9	34.7	348.7	13.3	171.4	60.7	18.8	123.1	0.8	Shared	Not Found	Peak Found	High	High	High	Not Found	Peak Found	High	High	High	Peak Found	High	High	Peak Found	Peak Found	Peak Found	High
	FALSE	High	[R].EAFLNTEDKGDSLDSVEALIK.[K]			2	3	23	A0A0D9SF54; Q13813	A0A0D9SF54 [1445-1465]; Q13813 [1465-1485]	1	2294.14	0	14	63.9	2.5	255	220.7	99.8	119.4	185.3	98.8	80.3		113.5	279.1	50.5	78.3	8.9	61.1	69	Shared	Peak Found	High	Peak Found	High	High	High	High	High	High	High	Not Found	Peak Found	High	Peak Found	High	Peak Found	Peak Found
	FALSE	High	[R].DVEDEETWIR.[E]			2	3	9	A0A0D9SF54; Q13813	A0A0D9SF54 [792-801]; Q13813 [792-801]	0	1291.58	0	198.8			379	29.9	95	37.2	67.7	120.6	35.8		36.2	360	14.5	102.3		16.6	306.4	Shared	Peak Found	Not Found	Not Found	High	Peak Found	Peak Found	Peak Found	Peak Found	High	Peak Found	Not Found	Peak Found	High	Peak Found	High	Not Found	Peak Found
	FALSE	High	[R].DVDETISWIK.[E]			2	3	4	A0A0D9SF54; Q13813	A0A0D9SF54 [263-272]; Q13813 [263-272]	0	1205.6	0		92.3	98.6	264.8	46.2	26.2		76.2	57.5		97.4	128	99.4	104.8	22.3	686.2			Shared	Not Found	High	Peak Found	High	Peak Found	Peak Found	Not Found	High	Peak Found	Not Found	Peak Found	Peak Found	Peak Found	Peak Found	Peak Found	Peak Found	Not Found
	FALSE	High	[R].DVDEIEAWISEK.[L]			2	3	11	A0A0D9SF54; Q13813	A0A0D9SF54 [1539-1550]; Q13813 [1559-1570]	0	1433.68	0	6.9	49.3	95.7	466	133.4		71.4	124	108.6	151.7		153.1	240.5	68.1	60.8		70.6		Shared	Peak Found	Peak Found	Peak Found	High	Peak Found	Not Found	High	High	High	High	Not Found	High	High	Peak Found	Peak Found	Not Found	Peak Found
	FALSE	High	[R].DTEQVDNWMSK.[Q]	1xOxidation [M9]		2	3	3	A0A0D9SF54; Q13813	A0A0D9SF54 [475-485]; Q13813 [475-485]	0	1368.57	0		288.7	436.6		109.5		165.6	90.9			176.2	83.7	1.8	365.9			81.1		Shared	Not Found	Peak Found	Peak Found	Not Found	Peak Found	Not Found	High	High	Not Found	Not Found	Peak Found	Peak Found	Peak Found	Peak Found	Not Found	Not Found	Peak Found
	FALSE	High	[K].DVTGAEALLER.[H]			2	3	18	A0A0D9SF54; Q13813	A0A0D9SF54 [1350-1360]; Q13813 [1370-1380]	0	1173.61	0	33.3	248.3	196	272.9	73.7	41.5	68.8	115.3	109.5	40.3	36.3	52.8	114.5	28	142.3		75.7	150.9	Shared	Peak Found	High	High	High	High	High	High	High	Peak Found	Peak Found	Peak Found	Peak Found	High	Peak Found	High	Not Found	Peak Found
	FALSE	High	[K].FDDFQK.[D]			2	3	1	A0A0D9SF54; Q13813	A0A0D9SF54 [1113-1118]; Q13813 [1133-1138]	0	799.362	0																			No Quan Values	Not Found	Not Found	Not Found	Not Found	Not Found	Not Found	Not Found	High	Not Found	Not Found	Not Found	Not Found	Not Found	Not Found	Not Found	Not Found	Not Found
	FALSE	High	[R].FKELSTLRR.[Q]			2	4	1	A0A0D9SF54; Q13813	A0A0D9SF54 [29-37]; Q13813 [29-37]	2	1149.67	0								277		237.8		217.4	364.7			703.1			Shared	Not Found	Not Found	Not Found	Not Found	Not Found	Not Found	Not Found	Peak Found	Not Found	Peak Found	Not Found	Peak Found	High	Not Found	Not Found	Peak Found	Not Found
	FALSE	High	[R].FKELSTLR.[R]			2	4	1	A0A0D9SF54; Q13813	A0A0D9SF54 [29-36]; Q13813 [29-36]	1	993.573	0			474.3	208.9	188.6		162.9	339.9		159.7	34.1	231.7							Shared	Not Found	Not Found	Peak Found	Peak Found	Peak Found	Not Found	Peak Found	Peak Found	Not Found	High	Peak Found	Peak Found	Not Found	Not Found	Not Found	Not Found	Not Found
	FALSE	High	[K].ELVLALYDYQEK.[S]			2	3	1	A0A0D9SF54; Q13813	A0A0D9SF54 [970-981]; Q13813 [970-981]	0	1483.77	0				116.6	220.5	13.4	148	96.8	217.2	55.1		295.2	52.1	252.7	29		303.5		Shared	Not Found	Not Found	Not Found	Peak Found	High	Peak Found	Peak Found	Peak Found	Peak Found	Peak Found	Not Found	Peak Found	Peak Found	Peak Found	Peak Found	Not Found	Peak Found
	FALSE	High	[R].ENLLEEQGSIALR.[Q]			2	3	19	A0A0D9SF54; Q13813	A0A0D9SF54 [1033-1045]; Q13813 [1033-1045]	0	1471.78	0	17.2	236.4	343.9	135.6	197	22.8	66.4	87.1	151.4	32.2	7	49.6	70.7	7.4	179.1	6.2	37.5	152.5	Shared	High	High	High	High	High	Peak Found	High	High	Peak Found	High	Peak Found	Peak Found	High	Peak Found	High	Peak Found	High
	FALSE	High	[R].ELPTAFDYVEFTR.[S]			2	3	13	A0A0D9SF54; Q13813	A0A0D9SF54 [2440-2452]; Q13813 [2455-2467]	0	1587.77	0	88.6	3.7	82	338.1	49.2	185.7	46.9	75.2	178.7	114		88.9	315.9	32.9	25	6.9	68.3	100.2	Shared	Peak Found	Peak Found	High	High	Peak Found	High	High	Peak Found	High	Peak Found	Not Found	High	High	Peak Found	Peak Found	Peak Found	Peak Found
	FALSE	High	[K].EQLMASDDFGR.[D]			2	3	6	A0A0D9SF54; Q13813	A0A0D9SF54 [275-285]; Q13813 [275-285]	0	1268.56	0	23.9			797.3					178.6	71.7	41.6		154.8	111.6	181.1		53.8	185.6	Shared	Peak Found	Not Found	Not Found	High	Not Found	Not Found	Not Found	Not Found	Peak Found	Peak Found	Peak Found	Not Found	High	Peak Found	Peak Found	Not Found	Peak Found
	FALSE	High	[R].EQADYCVSHMKPYVDGK.[G]	1xCarbamidomethyl [C6]		2	3	2	A0A0D9SF54; Q13813	A0A0D9SF54 [2421-2437]; Q13813 [2436-2452]	0	2026.9	0				1211.7		23.2	12.1				165.7		356.4		10.4	20.5			Shared	Not Found	Not Found	Not Found	High	Not Found	Peak Found	Peak Found	Not Found	Not Found	Not Found	Peak Found	Not Found	Peak Found	Not Found	Peak Found	Peak Found	Not Found
	FALSE	High	[K].ALINADELASDVAGAEALLDR.[H]			2	3	20	A0A0D9SF54; Q13813	A0A0D9SF54 [382-402]; Q13813 [382-402]	0	2127.09	0	26.7	224.7	159.6	75.3	128	37.2	109.6	180.1	36.5	27.7	30.2	266.8	213.7		80.3		153.4	50	Shared	Peak Found	High	High	Peak Found	High	High	Peak Found	High	High	High	Peak Found	Peak Found	High	Not Found	Peak Found	Not Found	Peak Found
	FALSE	High	[K].AKLDENSAFLQFNWK.[A]			2	4	2	A0A0D9SF54; Q13813	A0A0D9SF54 [1955-1969]; Q13813 [1970-1984]	1	1810.91	0																			No Quan Values	Not Found	Not Found	Not Found	Not Found	Not Found	Not Found	Not Found	Not Found	Not Found	Not Found	Not Found	Not Found	High	Not Found	Not Found	Not Found	Not Found
	FALSE	High	[R].AQLADSFHLQQFFR.[D]			2	3	13	A0A0D9SF54; Q13813	A0A0D9SF54 [567-580]; Q13813 [567-580]	0	1707.86	0				527.5		193.6	36.8	125.6	223.8	156		91.1	353.6	4.2	0.6	3		84.3	Shared	Not Found	Not Found	Not Found	High	Not Found	High	Peak Found	Peak Found	High	Peak Found	Not Found	High	High	Peak Found	Peak Found	Peak Found	Not Found
	FALSE	High	[R].ALSSEGKPYVTK.[E]			2	4	11	A0A0D9SF54; Q13813	A0A0D9SF54 [2400-2411]; Q13813 [2415-2426]	0	1279.69	0		494.8	419.3		291.4			303.9		83.6		207							Shared	Not Found	High	High	Not Found	High	Not Found	Not Found	High	Not Found	Peak Found	Not Found	High	Not Found	Not Found	Not Found	Not Found	Not Found
	FALSE	High	[R].ALSSEGKPYVTKEELYQNLTR.[E]			2	3	2	A0A0D9SF54; Q13813	A0A0D9SF54 [2400-2420]; Q13813 [2415-2435]	1	2426.26	0						1800													Shared	Not Found	Not Found	Not Found	Not Found	Not Found	High	Not Found	Not Found	Not Found	Not Found	Not Found	Not Found	Not Found	Not Found	Not Found	Not Found	Not Found
	FALSE	High	[K].ADVVESWIGEK.[E]			2	3	3	A0A0D9SF54; Q13813	A0A0D9SF54 [1970-1980]; Q13813 [1985-1995]	0	1232.62	1	42.4	302.1	295.7	4.5	181.5	61.4	73.3	167.4	230.7	95		120.9	41.1	53.2	79.9		50.9		Shared	High	High	Peak Found	Peak Found	Peak Found	Peak Found	Peak Found	Peak Found	Peak Found	Peak Found	Not Found	High	Peak Found	Peak Found	Peak Found	Not Found	Peak Found
	FALSE	High	[K].ADVVESWIGEKENSLK.[T]			2	3	4	A0A0D9SF54; Q13813	A0A0D9SF54 [1970-1985]; Q13813 [1985-2000]	1	1803.91	0				954.5									845.5						Shared	Not Found	Not Found	Not Found	High	Not Found	Not Found	Not Found	Not Found	Not Found	Not Found	Not Found	Not Found	High	Not Found	Not Found	Not Found	Not Found
	FALSE	High	[R].AALLELWELRR.[Q]			2	3	5	A0A0D9SF54; Q13813	A0A0D9SF54 [450-460]; Q13813 [450-460]	1	1369.8	0		20.2	31.6	72.4	763.4	32.1	164.8	100.6	7.5	72.1	109.6	84.3	240.7	97.7		1.7		1.2	Shared	Not Found	Peak Found	Peak Found	High	Peak Found	High	Peak Found	Peak Found	Peak Found	Peak Found	Peak Found	Peak Found	High	Peak Found	Not Found	Peak Found	Not Found
	FALSE	High	[R].AALLELWELR.[R]			2	3	11	A0A0D9SF54; Q13813	A0A0D9SF54 [450-459]; Q13813 [450-459]	0	1213.69	0	56.1	200.8	30.8	104.2	20	255.8	53.8	115.4	253.8	227.9		100.6	375.3		1.8			3.6	Shared	Peak Found	High	Peak Found	Peak Found	Peak Found	High	Peak Found	High	High	High	Not Found	High	High	Not Found	Peak Found	Not Found	Not Found
	FALSE	High	[R].AGTFQAFEQFGQQLLAHGHYASPEIK.[Q]			2	3	5	A0A0D9SF54; Q13813	A0A0D9SF54 [1372-1397]; Q13813 [1392-1417]	0	2875.42	0				595.2					111.3	128		12.9	935.8	13.6	0.7			2.5	Shared	Not Found	Not Found	Not Found	Peak Found	Not Found	Not Found	Not Found	Not Found	High	Peak Found	Not Found	Peak Found	High	Peak Found	Peak Found	Not Found	Not Found
	FALSE	High	[R].DCEQAENWMAAR.[E]	1xCarbamidomethyl [C2]		2	3	2	A0A0D9SF54; Q13813	A0A0D9SF54 [1433-1444]; Q13813 [1453-1464]	0	1480.59	0				1415.7					137.5				246.8						Shared	Not Found	Not Found	Not Found	High	Not Found	Not Found	Not Found	Not Found	Peak Found	Not Found	Not Found	Not Found	Peak Found	Not Found	Not Found	Not Found	Not Found
	FALSE	High	[K].DLIGVQNLLK.[K]			2	3	3	A0A0D9SF54; Q13813	A0A0D9SF54 [815-824]; Q13813 [815-824]	0	1112.67	0				371.7	263.3	175.7	79.2	153.1	232.7	56		65.9	155	37.9	112.4			97	Shared	Not Found	Not Found	Not Found	Peak Found	Peak Found	High	Peak Found	Peak Found	Peak Found	High	Not Found	Peak Found	Peak Found	Peak Found	Peak Found	Not Found	Not Found
	FALSE	High	[K].DLNSQADSLMTSSAFDTSQVK.[D]			2	3	4	A0A0D9SF54; Q13813	A0A0D9SF54 [1701-1721]; Q13813 [1716-1736]	0	2245.03	0				1248.3	279.1							110.4	162.2						Shared	Not Found	Not Found	Not Found	High	Peak Found	Not Found	Not Found	Not Found	Not Found	Not Found	Not Found	Peak Found	Peak Found	Not Found	Not Found	Not Found	Not Found
	FALSE	High	[R].DLMSWINGIR.[G]			2	3	5	A0A0D9SF54; Q13813	A0A0D9SF54 [1330-1339]; Q13813 [1350-1359]	0	1204.61	0				821.3		297.6			125.9	40.3			514.9						Shared	Not Found	Not Found	Not Found	High	Not Found	High	Not Found	Not Found	High	Peak Found	Not Found	Not Found	High	Not Found	Not Found	Not Found	Not Found
	FALSE	High	[R].DLAALGDKVNSLGETAER.[L]	1xPhospho [S11]	A0A0D9SF54 1xPhospho [S1271]; Q13813 1xPhospho [S1291]	2	3	2	A0A0D9SF54; Q13813	A0A0D9SF54 [1261-1278]; Q13813 [1281-1298]	1	1938.92	0			1065.9		503.6							122.3					108.1		Shared	Not Found	Not Found	High	Not Found	Peak Found	Not Found	Not Found	Not Found	Not Found	Not Found	Not Found	Peak Found	Not Found	Not Found	Not Found	Not Found	Peak Found
	FALSE	High	[R].DLAALGDKVNSLGETAER.[L]			2	3	22	A0A0D9SF54; Q13813	A0A0D9SF54 [1261-1278]; Q13813 [1281-1298]	1	1858.95	0	15.1	203	237.6	340.2	50.5		22.5	210.2		61.2			235.6	63.8	291.9	57.3	11		Shared	Peak Found	Peak Found	High	High	Peak Found	High	Peak Found	High	Peak Found	High	Not Found	Peak Found	High	Peak Found	High	Peak Found	Peak Found
	FALSE	High	[R].DLAALGDK.[V]			2	3	1	A0A0D9SF54; Q13813	A0A0D9SF54 [1261-1268]; Q13813 [1281-1288]	0	802.431	0		53.3	930.3	42.7			140.6	220.9		92					292.8	27.3			Shared	Not Found	Peak Found	Peak Found	Peak Found	Not Found	Not Found	Peak Found	Peak Found	Not Found	Peak Found	Not Found	Not Found	Not Found	Not Found	High	Peak Found	Not Found
	FALSE	High	[R].DLAALEDK.[V]			2	3	1	A0A0D9SF54; Q13813	A0A0D9SF54 [303-310]; Q13813 [303-310]	0	874.452	0		218.5	446.5	649.9	200.1			25	165.3	57.9					36.8				Shared	Not Found	Peak Found	Peak Found	High	Peak Found	Not Found	Not Found	Peak Found	Peak Found	Peak Found	Not Found	Not Found	Not Found	Not Found	Peak Found	Not Found	Not Found
	FALSE	High	[R].DLAALEDKVK.[A]			2	3	10	A0A0D9SF54; Q13813	A0A0D9SF54 [303-312]; Q13813 [303-312]	1	1101.62	0			13.2	294.4		0.8	33.4	106.2	5.6	31.3	6.3	73.4	232.9	2.4	338		120.9	541.3	Shared	Not Found	Not Found	Peak Found	High	Not Found	Peak Found	Peak Found	Peak Found	Peak Found	Peak Found	Peak Found	Peak Found	High	Peak Found	High	Not Found	Peak Found
	FALSE	High	[R].DLASVQALLR.[K]			2	3	7	A0A0D9SF54; Q13813	A0A0D9SF54 [286-295]; Q13813 [286-295]	0	1085.63	0																			No Quan Values	Not Found	Not Found	Not Found	High	High	Not Found	High	Peak Found	Peak Found	High	Not Found	High	Peak Found	Not Found	Peak Found	Not Found	Peak Found
	FALSE	High	[K].DLASVNNLLK.[K]			2	3	5	A0A0D9SF54; Q13813	A0A0D9SF54 [1674-1683]; Q13813 [1689-1698]	0	1086.62	0	10.7	251.1	38.3	348.8	283	125.9	36.9		209.3	30.1		57	35.1		9.7	70.8	44	249.3	Shared	Peak Found	High	Peak Found	Peak Found	Peak Found	High	Peak Found	Not Found	Peak Found	Peak Found	Not Found	High	Peak Found	Not Found	Peak Found	Peak Found	Peak Found
	FALSE	High	[K].ASAFNSWFENAEEDLTDPVR.[C]			2	3	10	A0A0D9SF54; Q13813	A0A0D9SF54 [2085-2104]; Q13813 [2100-2119]	0	2298.03	0				497.2		71.8			156.1	140.8	451.5		288.7					193.9	Shared	Not Found	Not Found	Not Found	High	Not Found	High	Not Found	Not Found	High	Peak Found	Peak Found	Not Found	High	Not Found	Not Found	Not Found	Not Found
	FALSE	High	[R].CNSLEEIK.[A]	1xCarbamidomethyl [C1]		2	3	1	A0A0D9SF54; Q13813	A0A0D9SF54 [2105-2112]; Q13813 [2120-2127]	0	992.472	0		54.6	576.6		239.6		91.3	174.7		68.2	113	29.3		59.6	393				Shared	Not Found	Peak Found	Peak Found	Not Found	Peak Found	Not Found	Peak Found	High	Not Found	Peak Found	Peak Found	Peak Found	Not Found	Peak Found	Peak Found	Not Found	Not Found
	FALSE	High	[R].DADETKEWIEEK.[N]			2	3	12	A0A0D9SF54; Q13813	A0A0D9SF54 [1221-1232]; Q13813 [1241-1252]	1	1492.68	0			86.1	301.8	203.7	80.5	35.3	23.1	44.9	137		163.9	316.3	65	62.7		152.4	127.1	Shared	Not Found	Not Found	Peak Found	High	Peak Found	Peak Found	Peak Found	Peak Found	High	Peak Found	Not Found	High	High	Peak Found	High	Not Found	Peak Found
	FALSE	High	[K].CTELNQAWSSLGK.[R]	1xCarbamidomethyl [C1]		2	3	6	A0A0D9SF54; Q13813	A0A0D9SF54 [1294-1306]; Q13813 [1314-1326]	0	1493.71	0				963.2					211.2				625.6						Shared	Not Found	Not Found	Not Found	High	Not Found	Not Found	Not Found	Not Found	High	Not Found	Not Found	Not Found	High	Not Found	Not Found	Not Found	Not Found
	FALSE	High	[R].LAQFVEHWK.[E]			2	3	2	A0A0D9SF54; Q13813	A0A0D9SF54 [1830-1838]; Q13813 [1845-1853]	0	1157.61	0				124.6				19.4		26.1	853.4		98.1	26.7	420.6	27.1	161.1	42.9	Shared	Not Found	Not Found	Not Found	Peak Found	Not Found	Not Found	Not Found	Peak Found	Not Found	Peak Found	Peak Found	Not Found	High	Peak Found	Peak Found	Peak Found	Peak Found
	FALSE	High	[R].LEAELAAHEPAIQGVLDTGKK.[L]			2	3	1	A0A0D9SF54; Q13813	A0A0D9SF54 [1794-1814]; Q13813 [1809-1829]	1	2190.18	0				613.1			72.6	200.9	60.2	23.2		123.5	168.9		254.7			282.9	Shared	Not Found	Not Found	Not Found	High	Not Found	Not Found	Peak Found	Peak Found	Peak Found	Peak Found	Not Found	Peak Found	Peak Found	Not Found	Peak Found	Not Found	Not Found
	FALSE	High	[K].IEDLGAAMEEALILDNK.[Y]			2	3	2	A0A0D9SF54; Q13813	A0A0D9SF54 [2250-2266]; Q13813 [2265-2281]	0	1844.93	0				908				183.5					330		112.5		266		Shared	Not Found	Not Found	Not Found	High	Not Found	Not Found	Not Found	Peak Found	Not Found	Not Found	Not Found	Not Found	Peak Found	Not Found	Peak Found	Not Found	Peak Found
	FALSE	High	[R].IDGITIQAR.[Q]			2	3	8	A0A0D9SF54; Q13813	A0A0D9SF54 [734-742]; Q13813 [734-742]	0	986.563	0		288.2		434.3	125.2		76.8	112.2	165.2	54.6		110.3	187.4		184.6		60.3	0.9	Shared	Not Found	High	Peak Found	High	Peak Found	High	Peak Found	Peak Found	Peak Found	Peak Found	Not Found	Peak Found	High	Peak Found	Peak Found	Not Found	Peak Found
	FALSE	High	[K].LDILDQER.[A]			2	3	5	A0A0D9SF54; Q13813	A0A0D9SF54 [1400-1407]; Q13813 [1420-1427]	0	1001.53	0				377.3	65.9	47.4	113.3	89.6	153	65.6			120.4	9.7	375.7		59.7	322.5	Shared	Not Found	Not Found	Not Found	High	Peak Found	Peak Found	Peak Found	Peak Found	Peak Found	Peak Found	Not Found	Not Found	Peak Found	Peak Found	High	Not Found	Peak Found
	FALSE	High	[K].LDETGNLMISEGHFASETIR.[T]	1xOxidation [M8]		2	4	2	A0A0D9SF54; Q13813	A0A0D9SF54 [102-121]; Q13813 [102-121]	0	2236.06	0							625.4	641.9				532.7							Shared	Not Found	Not Found	Not Found	Not Found	Not Found	Not Found	Peak Found	High	Not Found	Not Found	Not Found	Peak Found	Not Found	Not Found	Not Found	Not Found	Not Found
	FALSE	High	[K].LDETGNLMISEGHFASETIR.[T]			2	4	2	A0A0D9SF54; Q13813	A0A0D9SF54 [102-121]; Q13813 [102-121]	0	2220.06	0				1169.6			87.2		340				203.3						Shared	Not Found	Not Found	Not Found	High	Not Found	Not Found	Peak Found	Not Found	Peak Found	Not Found	Not Found	Not Found	Peak Found	Not Found	Not Found	Not Found	Not Found
	FALSE	High	[K].LDENSAFLQFNWK.[A]			2	4	8	A0A0D9SF54; Q13813	A0A0D9SF54 [1957-1969]; Q13813 [1972-1984]	0	1611.78	0	29	33.4		527.6		41.4	31.6	95.3	142.4	310.3	160.6	15.3	211.7	15.5	2.9	79.4	24.8	78.8	Shared	Peak Found	Peak Found	Not Found	Peak Found	Not Found	High	Peak Found	Peak Found	High	High	Peak Found	Peak Found	High	Peak Found	Peak Found	Peak Found	Peak Found
	FALSE	High	[K].KLSDDNTIGKEEIQQR.[L]			2	3	6	A0A0D9SF54; Q13813	A0A0D9SF54 [1814-1829]; Q13813 [1829-1844]	2	1873.96	0	879.9	2.7	44.1	12.7	6.8		2.2	19.5	4.2	1.7	65.8	15.5	17.9	14.9	391.4	242	77.6	1.1	Shared	Peak Found	Peak Found	Peak Found	High	Peak Found	Not Found	Peak Found	Peak Found	High	High	Peak Found	Peak Found	High	Peak Found	Peak Found	Peak Found	Peak Found
	FALSE	High	[K].KLLVGSEDYGR.[D]			2	3	2	A0A0D9SF54; Q13813	A0A0D9SF54 [1769-1779]; Q13813 [1784-1794]	1	1236.66	0			198.4	472.8	115	135.9	110.8	143.3	52.6	82.2		127.8	70.5		60			230.6	Shared	Not Found	Not Found	Peak Found	Peak Found	Peak Found	Peak Found	Peak Found	Peak Found	Peak Found	Peak Found	Not Found	High	Peak Found	Not Found	Peak Found	Not Found	Not Found
	FALSE	High	[K].KLLEATELK.[G]			2	3	5	A0A0D9SF54; Q13813	A0A0D9SF54 [662-670]; Q13813 [662-670]	1	1044.63	0			618.1	118.6	196.2		162.7	318.7		126.3		169	26.6	21.2			30.2	12.4	Shared	Peak Found	High	Peak Found	Peak Found	Peak Found	Peak Found	High	Peak Found	Peak Found	Peak Found	Not Found	High	Peak Found	Peak Found	Not Found	Not Found	Peak Found
	FALSE	High	[K].KLLEAQSHFR.[K]			2	4	1	A0A0D9SF54; Q13813	A0A0D9SF54 [2063-2072]; Q13813 [2078-2087]	1	1228.68	0		141.8	43.1	211.8			143.1	273.4		112	149.5	309.2	361.8		54.1				Shared	Not Found	Peak Found	Peak Found	Peak Found	Not Found	Not Found	Peak Found	Peak Found	Not Found	Peak Found	Peak Found	Peak Found	High	Not Found	Peak Found	Not Found	Not Found
	FALSE	High	[K].KHEAFETDFTVHKDR.[V]			2	3	3	A0A0D9SF54; Q13813	A0A0D9SF54 [1896-1910]; Q13813 [1911-1925]	2	1859.9	0	18.1		145.4	240.4		160.8	14.4	19.9	16.5				651.3	509.4	2.2		21.8		Shared	Peak Found	Not Found	Peak Found	High	Not Found	High	Peak Found	Peak Found	Peak Found	Not Found	Not Found	Not Found	High	Peak Found	Peak Found	Not Found	Peak Found
	FALSE	High	[K].KHEAFETDFTVHK.[D]			2	3	4	A0A0D9SF54; Q13813	A0A0D9SF54 [1896-1908]; Q13813 [1911-1923]	1	1588.78	0		51.3	84.5	466.8		366.4	92.7		41.8	27.4		7.1	372.9		41.7		247.4		Shared	Not Found	Peak Found	Peak Found	High	Not Found	Peak Found	Peak Found	Not Found	Peak Found	Peak Found	Not Found	Peak Found	High	Not Found	Peak Found	Not Found	Peak Found
	FALSE	High	[K].KHALLEADVAAHQDR.[I]			2	3	1	A0A0D9SF54; Q13813	A0A0D9SF54 [719-733]; Q13813 [719-733]	1	1673.87	0				310.6			33.3		146.3	39.7		259.6	650.1	360.4					Shared	Not Found	Not Found	Not Found	High	Not Found	Not Found	Peak Found	Not Found	Peak Found	Peak Found	Not Found	Peak Found	Peak Found	Peak Found	Not Found	Not Found	Not Found
	FALSE	High	[K].KHEALMSDLSAYGSSIQALR.[E]			2	3	2	A0A0D9SF54; Q13813	A0A0D9SF54 [931-950]; Q13813 [931-950]	1	2177.1	0				1039.7					206.7	106.9			446.7						Shared	Not Found	Not Found	Not Found	High	Not Found	Not Found	Not Found	Not Found	Peak Found	Peak Found	Not Found	Not Found	High	Not Found	Not Found	Not Found	Not Found
	FALSE	High	[K].KHQLLEADISAHEDR.[L]			2	3	3	A0A0D9SF54; Q13813	A0A0D9SF54 [1684-1698]; Q13813 [1699-1713]	1	1761.89	0		43.5		416.9	20	210.1							441	19.5	138.7			510.3	Shared	Not Found	Peak Found	Not Found	High	Peak Found	High	Not Found	Not Found	Not Found	Not Found	Not Found	Not Found	High	Peak Found	Peak Found	Not Found	Not Found
	FALSE	High	[K].KHQALQAEIAGHEPR.[I]			2	3	5	A0A0D9SF54; Q13813	A0A0D9SF54 [825-839]; Q13813 [825-839]	1	1684.89	0				418.1		212	37.2	21	52.7	47.4		114.8	687.4		24.9		69	115.5	Shared	Not Found	Not Found	Not Found	High	Not Found	High	Peak Found	Peak Found	High	Peak Found	Not Found	Peak Found	High	Not Found	Peak Found	Not Found	Peak Found
	FALSE	High	[K].KHQLLEADISAHEDRLK.[D]			2	3	1	A0A0D9SF54; Q13813	A0A0D9SF54 [1684-1700]; Q13813 [1699-1715]	2	2003.07	0				241.1									1558.9						Shared	Not Found	Not Found	Not Found	Peak Found	Not Found	Not Found	Not Found	Not Found	Not Found	Not Found	Not Found	Not Found	High	Not Found	Not Found	Not Found	Not Found
	FALSE	High	[K].KIEDLGAAMEEALILDNK.[Y]	1xOxidation [M9]		2	3	1	A0A0D9SF54; Q13813	A0A0D9SF54 [2249-2266]; Q13813 [2264-2281]	1	1989.02	0							590	1210											Shared	Not Found	Not Found	Not Found	Not Found	Not Found	Not Found	Peak Found	High	Not Found	Not Found	Not Found	Not Found	Not Found	Not Found	Not Found	Not Found	Not Found
	FALSE	High	[K].KIEDLGAAMEEALILDNK.[Y]			2	3	3	A0A0D9SF54; Q13813	A0A0D9SF54 [2249-2266]; Q13813 [2264-2281]	1	1973.03	0			36.5	940.2	47.3			50.2	144	118		20.5	268.8		80.2	76.1	18.2		Shared	Not Found	Not Found	Peak Found	High	Peak Found	Not Found	Not Found	Peak Found	High	Peak Found	Not Found	Peak Found	Peak Found	Not Found	Peak Found	Peak Found	Peak Found
	FALSE	High	[K].KLDPAQSASRENLLEEQGSIALR.[Q]	1xPhospho [S]	A0A0D9SF54 1xPhospho [S]; Q13813 1xPhospho [S]	2	3	10	A0A0D9SF54; Q13813	A0A0D9SF54 [1023-1045]; Q13813 [1023-1045]	2	2605.3	0								17.5		571.7		507		469.5			234.3		Shared	Not Found	Not Found	Not Found	Not Found	Not Found	Not Found	Not Found	Peak Found	Not Found	High	Not Found	High	Not Found	High	Not Found	Not Found	Peak Found
	FALSE	High	[R].LAALADQWQFLVQK.[S]			2	3	9	A0A0D9SF54; Q13813	A0A0D9SF54 [1618-1631]; Q13813 [1633-1646]	0	1630.9	0			77.4	292.4	74.3	56.8	80.1	128	75.3	34.7	519.5	131.9	275.6		0.7		22.2	31	Shared	Not Found	Not Found	Peak Found	Peak Found	High	High	Peak Found	High	High	Peak Found	Peak Found	Peak Found	High	Not Found	Peak Found	Not Found	Peak Found
	FALSE	High	[K].IAALQAFADQLIAAGHYAK.[G]			2	3	24	A0A0D9SF54; Q13813	A0A0D9SF54 [1481-1499]; Q13813 [1501-1519]	0	1972.07	0		40.9	14	285.2	9.5	214.7	133.9	279.6	158.3	2.6	31.4	22.8	520.8	12.3	1.7	3.3	5.1	63.8	Shared	Peak Found	High	Peak Found	High	High	High	High	High	High	Peak Found	Peak Found	High	High	Peak Found	High	Peak Found	Peak Found
	FALSE	High	[R].KVEDLFLTFAK.[K]			2	3	10	A0A0D9SF54; Q13813	A0A0D9SF54 [2073-2083]; Q13813 [2088-2098]	1	1310.74	0				603			125.7	218.7	135.5	154.3		170.7	290.6		81.2		20.2		Shared	Not Found	Not Found	Not Found	High	Not Found	Not Found	Peak Found	High	High	Peak Found	Not Found	High	High	Not Found	Peak Found	Not Found	Peak Found
	FALSE	High	[R].LKGLALQR.[Q]			2	3	2	A0A0D9SF54; Q13813	A0A0D9SF54 [240-247]; Q13813 [240-247]	1	898.583	0			444.9		128		157.3	570.7		126.3		329					43.8		Shared	Not Found	Not Found	Peak Found	Not Found	Peak Found	Not Found	High	High	Not Found	Peak Found	Not Found	Peak Found	Not Found	Not Found	Not Found	Not Found	Peak Found
	FALSE	High	[R].LKDLNSQADSLMTSSAFDTSQVK.[D]			2	3	4	A0A0D9SF54; Q13813	A0A0D9SF54 [1699-1721]; Q13813 [1714-1736]	1	2486.21	0		374.6	270.3	590.6	252.2				62.9	44.4			140.3		36.4		28.4		Shared	Not Found	Peak Found	Peak Found	High	Peak Found	Not Found	Not Found	Not Found	Peak Found	Peak Found	Not Found	Not Found	High	Not Found	Peak Found	Not Found	Peak Found
	FALSE	High	[K].LIDVNHYAKDEVAAR.[M]			2	3	2	A0A0D9SF54; Q13813	A0A0D9SF54 [638-652]; Q13813 [638-652]	1	1713.89	0				535.4			38.4	96.3		75.4		82	888		45.1		39.3		Shared	Not Found	Not Found	Not Found	High	Not Found	Not Found	Peak Found	Peak Found	Not Found	Peak Found	Not Found	Peak Found	High	Not Found	Peak Found	Not Found	Peak Found
	FALSE	High	[K].LIDVNHYAK.[D]			2	3	4	A0A0D9SF54; Q13813	A0A0D9SF54 [638-646]; Q13813 [638-646]	0	1072.58	0	25.2	131.8	265.4	371.5	92.4		96.2	137.4	20.4	68.4		122.5	24.7	35.9	117.9	9.5	38.3	242.5	Shared	Peak Found	High	Peak Found	Peak Found	Peak Found	Not Found	High	High	Peak Found	Peak Found	Not Found	Peak Found	Peak Found	Peak Found	Peak Found	Peak Found	Peak Found
	FALSE	High	[K].LLEATELK.[G]			2	3	6	A0A0D9SF54; Q13813	A0A0D9SF54 [663-670]; Q13813 [663-670]	0	916.535	0		9.5	30.2	346.5	131.4	6.2	64.9	133.6	94.8	79.7		108.1	84.3	3.1	318.2		62.8	326.9	Shared	Not Found	Peak Found	Peak Found	High	Peak Found	Peak Found	Peak Found	Peak Found	High	Peak Found	Not Found	Peak Found	High	Peak Found	High	Not Found	Peak Found
	FALSE	High	[K].LLEAQSHFR.[K]			2	4	19	A0A0D9SF54; Q13813	A0A0D9SF54 [2064-2072]; Q13813 [2079-2087]	0	1100.58	0	14.2	224.9	252.8	233.3	60		101.5	259.1	27.7	89.2	19.4	158.8	127.6	10	109.8		18	93.8	Shared	Peak Found	High	High	High	High	High	High	High	Peak Found	High	Peak Found	High	High	Peak Found	High	Not Found	Peak Found
	FALSE	High	[K].LFGAAEVQR.[F]			2	3	11	A0A0D9SF54; Q13813	A0A0D9SF54 [251-259]; Q13813 [251-259]	0	990.537	1			202.9	74.9	534.6	28.8	13.6	51.4	103.1	151.2		49.7	164.8		115.9	231.4	8.2	69.5	Shared	Not Found	Not Found	High	Peak Found	Peak Found	High	Peak Found	High	Peak Found	Peak Found	Not Found	Peak Found	High	Not Found	High	Peak Found	Peak Found
	FALSE	High	[K].LGESQTLQQFSR.[D]			2	3	23	A0A0D9SF54; Q13813	A0A0D9SF54 [1527-1538]; Q13813 [1547-1558]	0	1393.71	0		67.6	33.1	240	113.2	64.9	72.1	162.1	186.4	64.6	103.9	93.7	159.1	16.9	169.1	3.2	38.9	211.3	Shared	Not Found	High	High	High	High	High	High	High	High	High	Peak Found	High	High	Peak Found	High	Peak Found	High
	FALSE	High	[K].GEIDAHEDSFK.[S]			2	3	4	A0A0D9SF54; Q13813	A0A0D9SF54 [408-418]; Q13813 [408-418]	0	1247.55	0		48.8	188.5	380.5	96.8	69.6	77.5	84.1	130.2	110	23.2	38	26.2	126	59.6	166.2	124.3	50.6	Shared	Not Found	Peak Found	High	Peak Found	Peak Found	High	Peak Found	High	Peak Found	Peak Found	Peak Found	Peak Found	Peak Found	Peak Found	Peak Found	Peak Found	Peak Found
	FALSE	High	[R].GLVSSDELAKDVTGAEALLER.[H]			2	3	17	A0A0D9SF54; Q13813	A0A0D9SF54 [1340-1360]; Q13813 [1360-1380]	1	2173.13	0	42.8			138.9	31.5	175.1	37.1	170.4		26.6	82.4		594	43.9	447			10.1	Shared	Peak Found	Not Found	Not Found	High	Peak Found	High	Peak Found	High	Not Found	Peak Found	Peak Found	Not Found	High	Peak Found	High	Not Found	Not Found
	FALSE	High	[R].GLVSSDELAK.[D]			2	3	6	A0A0D9SF54; Q13813	A0A0D9SF54 [1340-1349]; Q13813 [1360-1369]	0	1018.54	0		143.3	83.4	796.1	113.5	1.2	48.6	76.7		46.9		57.9	76.1		220.3	56.8	57.7	21.5	Shared	Not Found	High	Peak Found	High	Peak Found	Peak Found	Peak Found	High	Not Found	Peak Found	Not Found	Peak Found	Peak Found	Not Found	Peak Found	Peak Found	Peak Found
	FALSE	High	[R].GKDLIGVQNLLKK.[H]			2	3	2	A0A0D9SF54; Q13813	A0A0D9SF54 [813-825]; Q13813 [813-825]	2	1425.88	0				599		92.3		109.4		88.9			580.6		329.8				Shared	Not Found	Not Found	Not Found	Peak Found	Not Found	High	Not Found	Peak Found	Not Found	Peak Found	Not Found	Not Found	High	Not Found	Peak Found	Not Found	Not Found
	FALSE	High	[R].GKDLIGVQNLLK.[K]			2	3	12	A0A0D9SF54; Q13813	A0A0D9SF54 [813-824]; Q13813 [813-824]	1	1297.78	0			171.7	482.5		72.7	46	158.6	305.6	39.2	16.5		274.1		67.7	58.9	3.6	102.7	Shared	Not Found	Not Found	High	Peak Found	Not Found	High	High	High	High	High	Peak Found	Not Found	High	Not Found	Peak Found	Peak Found	Peak Found
	FALSE	High	[R].FQFFQR.[D]			2	4	2	A0A0D9SF54; Q13813	A0A0D9SF54 [46-51]; Q13813 [46-51]	0	872.441	0				578.1	56.8	185.8	40.8	97.8	263.6	77.6		75.7	386.2	13.1	17.8		6.7		Shared	Not Found	Not Found	Not Found	Peak Found	Peak Found	High	Peak Found	Peak Found	High	Peak Found	Not Found	Peak Found	Peak Found	Peak Found	Peak Found	Not Found	Peak Found
	FALSE	High	[R].FNRDVDETISWIK.[E]			2	3	4	A0A0D9SF54; Q13813	A0A0D9SF54 [260-272]; Q13813 [260-272]	1	1622.82	0				779.2		79.9							884					56.9	Shared	Not Found	Not Found	Not Found	Peak Found	Not Found	Peak Found	Not Found	Not Found	Not Found	Not Found	Not Found	Not Found	High	Not Found	Not Found	Not Found	Not Found
	FALSE	High	[K].GDILTLLNSTNKDWWK.[V]			2	3	2	A0A0D9SF54; Q13813	A0A0D9SF54 [991-1006]; Q13813 [991-1006]	1	1903.99	0																			No Quan Values	Not Found	Not Found	Not Found	Not Found	Not Found	Not Found	Not Found	Not Found	Not Found	Not Found	Not Found	Not Found	High	Not Found	Not Found	Not Found	Not Found
	FALSE	High	[K].HQALQAEIAGHEPR.[I]			2	3	11	A0A0D9SF54; Q13813	A0A0D9SF54 [826-839]; Q13813 [826-839]	0	1556.79	0				389.6	9.5	176.7	62.1	103.5	100.3	49.1	12.1	95.2	446	5.2	188.8		38.1	123.7	Shared	Not Found	Not Found	Not Found	High	Peak Found	High	Peak Found	Peak Found	High	Peak Found	Peak Found	High	High	Peak Found	High	Not Found	Peak Found
	FALSE	High	[K].HQAFEAEVQANSGAIVK.[L]			2	4	5	A0A0D9SF54; Q13813	A0A0D9SF54 [85-101]; Q13813 [85-101]	0	1798.91	0			705.9	165.7		38.7	14.8	21.9	63.5	86.6		322	62.1		47.2		44.9	226.7	Shared	Not Found	Not Found	High	High	Not Found	Peak Found	Peak Found	Peak Found	Peak Found	Peak Found	Not Found	High	Peak Found	Not Found	Peak Found	Not Found	Peak Found
	FALSE	High	[K].HQAFEAELSANQSR.[I]			2	3	6	A0A0D9SF54; Q13813	A0A0D9SF54 [614-627]; Q13813 [614-627]	0	1587.75	0		7.3	548.9	166		125.7	35.7	302.5	8.8	46.3		180.8	70.8	12	49.2	92.9	7.7	145.5	Shared	Not Found	Peak Found	Peak Found	High	Not Found	Peak Found	Peak Found	High	Peak Found	Peak Found	Not Found	High	Peak Found	Peak Found	Peak Found	Peak Found	Peak Found
	FALSE	High	[K].HQAFEAELHANADR.[I]			2	3	17	A0A0D9SF54; Q13813	A0A0D9SF54 [1577-1590]; Q13813 [1592-1605]	0	1608.75	0	11			539.1		205.7	56.4	67.4	65.6	49		128	514.3	10.4	69.3	3.8		80.1	Shared	Peak Found	Not Found	Not Found	High	Not Found	High	High	High	High	Peak Found	Not Found	High	High	Peak Found	High	Peak Found	Not Found
	FALSE	High	[K].HQLLEADISAHEDR.[L]			2	3	8	A0A0D9SF54; Q13813	A0A0D9SF54 [1685-1698]; Q13813 [1700-1713]	0	1633.79	0		164.2	86.6	243.5			227.3	268.6		129.9	48.3	246.1	199.1	128			21.2	37.1	Shared	Not Found	Peak Found	Peak Found	Peak Found	Not Found	Not Found	Peak Found	High	Not Found	High	Peak Found	High	High	Peak Found	Not Found	Not Found	Peak Found
	FALSE	High	[R].HQEHKGEIDAHEDSFK.[S]			2	3	15	A0A0D9SF54; Q13813	A0A0D9SF54 [403-418]; Q13813 [403-418]	1	1906.87	0	319.2	1.5		662.5	60.8	145.7	1.2		23.6	19.2		6.3	516.8	0.7	2.3			40.3	Shared	Peak Found	Peak Found	Not Found	High	Peak Found	High	Peak Found	Not Found	High	High	Not Found	Peak Found	High	Peak Found	Peak Found	Not Found	Not Found
	FALSE	High	[K].KFEEFQTDMAAHEER.[V]			2	3	7	A0A0D9SF54; Q13813	A0A0D9SF54 [190-204]; Q13813 [190-204]	1	1867.83	0	57.5	552.4	81.8	623.5	61.8	61.7	4.9		84.2	38.3	14.2	7.8	109.8	32	11.6		30.6	28.1	Shared	Peak Found	Peak Found	Peak Found	High	Peak Found	High	Peak Found	Not Found	Peak Found	High	Peak Found	Peak Found	High	Peak Found	Peak Found	Not Found	Peak Found
	FALSE	High	[K].KGDILTLLNSTNK.[D]			2	3	10	A0A0D9SF54; Q13813	A0A0D9SF54 [990-1002]; Q13813 [990-1002]	1	1416.81	0	282	178.6		455.4	127.3	68	39.9	65.7	184.3	37.3		43.4	148.4	7.8	18.8		16.2	127	Shared	Peak Found	High	Not Found	High	Peak Found	Peak Found	Peak Found	Peak Found	High	Peak Found	Not Found	High	High	Peak Found	Peak Found	Not Found	Peak Found
	FALSE	High	[K].KGDILTLLNSTNKDWWK.[V]			2	3	6	A0A0D9SF54; Q13813	A0A0D9SF54 [990-1006]; Q13813 [990-1006]	2	2032.09	0			51.4	590.8	147.1	3.7			60	155.1		21.6	725		36.1	8.7		0.6	Shared	Not Found	Not Found	Peak Found	High	Peak Found	Peak Found	Not Found	Not Found	High	Peak Found	Not Found	Peak Found	High	Not Found	Peak Found	Peak Found	Not Found
	FALSE	High	[K].KASAFNSWFENAEEDLTDPVR.[C]			2	3	8	A0A0D9SF54; Q13813	A0A0D9SF54 [2084-2104]; Q13813 [2099-2119]	1	2426.13	0	138.6	95.7	191.2	272.4	470.5	39.7			30.4	23			245.4	55.9	10.9	220.3		6	Shared	Peak Found	Peak Found	Peak Found	High	Peak Found	High	Not Found	Not Found	High	High	Not Found	Not Found	High	Peak Found	Peak Found	Peak Found	Not Found
	FALSE	High	[K].GRELPTAFDYVEFTR.[S]			2	3	1	A0A0D9SF54; Q13813	A0A0D9SF54 [2438-2452]; Q13813 [2453-2467]	1	1800.89	0				1800															Shared	Not Found	Not Found	Not Found	High	Not Found	Not Found	Not Found	Not Found	Not Found	Not Found	Not Found	Not Found	Not Found	Not Found	Not Found	Not Found	Not Found
	FALSE	High	[K].GNAMVEEGHFAAEDVK.[A]			2	3	10	A0A0D9SF54; Q13813	A0A0D9SF54 [847-862]; Q13813 [847-862]	0	1703.77	0			410	670.3		30.2	51.5	16.4	106.1	52.4		46.5	198.6	12	50.5		102.1	53.3	Shared	Not Found	Not Found	Peak Found	High	Not Found	Peak Found	Peak Found	Peak Found	High	Peak Found	Not Found	Peak Found	High	Peak Found	Peak Found	Not Found	Peak Found
	FALSE	High	[K].GNAMVEEGHFAAEDVK.[A]	1xOxidation [M4]		2	3	1	A0A0D9SF54; Q13813	A0A0D9SF54 [847-862]; Q13813 [847-862]	0	1719.76	0																			No Quan Values	Not Found	Not Found	Not Found	Not Found	Not Found	Not Found	Not Found	High	Not Found	Not Found	Not Found	Not Found	Not Found	Not Found	Not Found	Not Found	Not Found
	FALSE	High	[K].HALLEADVAAHQDR.[I]			2	3	10	A0A0D9SF54; Q13813	A0A0D9SF54 [720-733]; Q13813 [720-733]	0	1545.78	0	240.7			514.2			104.7	108.5	157.3			183.6	378.6		55.4		57.1		Shared	Peak Found	Not Found	Not Found	High	Not Found	Not Found	High	High	Peak Found	Not Found	Not Found	High	High	Not Found	Peak Found	Not Found	Peak Found
	FALSE	High	[K].HEALMSDLSAYGSSIQALR.[E]			2	3	2	A0A0D9SF54; Q13813	A0A0D9SF54 [932-950]; Q13813 [932-950]	0	2049.01	0		572.8		122.2							932.6				172.4				Shared	Not Found	Peak Found	Not Found	High	Not Found	Not Found	Not Found	Not Found	Not Found	Not Found	Peak Found	Not Found	Not Found	Not Found	Peak Found	Not Found	Not Found
	FALSE	High	[K].HEAFETDFTVHKDR.[V]			2	3	1	A0A0D9SF54; Q13813	A0A0D9SF54 [1897-1910]; Q13813 [1912-1925]	1	1731.81	0			62.3	108.7	63.5	21.8		87.1		34.1		101.2	167.2					1154.1	Shared	Not Found	Not Found	Peak Found	Peak Found	Peak Found	Peak Found	Not Found	Peak Found	Not Found	Peak Found	Not Found	Peak Found	High	Not Found	Not Found	Not Found	Not Found
	FALSE	High	[R].GVIDMGNSLIER.[G]	1xOxidation [M5]		2	3	1	A0A0D9SF54; Q13813	A0A0D9SF54 [1593-1604]; Q13813 [1608-1619]	0	1319.66	0																			No Quan Values	Not Found	High	Not Found	Not Found	Not Found	Not Found	Not Found	Not Found	Not Found	Not Found	Not Found	Not Found	Not Found	Not Found	Not Found	Not Found	Not Found
	FALSE	High	[R].GVIDMGNSLIER.[G]			2	3	9	A0A0D9SF54; Q13813	A0A0D9SF54 [1593-1604]; Q13813 [1608-1619]	0	1303.67	0		22.3	9.2	1034.8	5.8	110.3	14.7		129	38.7		7.8	190.2		56.6	6.6	14.8	159.4	Shared	Not Found	Peak Found	Peak Found	High	Peak Found	High	Peak Found	Not Found	High	Peak Found	Not Found	Peak Found	High	Not Found	Peak Found	Peak Found	Peak Found
FALSE	High	Master Protein	P02549	Spectrin alpha chain, erythrocytic 1 OS=Homo sapiens OX=9606 GN=SPTA1 PE=1 SV=5	0	803.703	66	155	1058	155	1	2419	279.8	5.05	26140	1188.15	153	117	0	54.1	129.7	13.9	15.4	26.1	12.3	181.1	162.2	9.6	17.4	26.2	410.4	7.9	299	58.5	13	354.2	9.1	1.1558e+10	2.77186e+10	2.97722e+09	3.29037e+09	5.58003e+09	2.63232e+09	3.87044e+10	3.46658e+10	2.05167e+09	3.71557e+09	5.59727e+09	8.77214e+10
	Checked	Confidence	Annotated Sequence	Modifications	Modifications in Master Proteins	# Protein Groups	# Proteins	# PSMs	Master Protein Accessions	Positions in Master Proteins	# Missed Cleavages	Theo. MH+ [Da]	# Razor Quan Results	Abundances (Scaled): F1: Sample	Abundances (Scaled): F2: Sample	Abundances (Scaled): F3: Sample	Abundances (Scaled): F4: Sample	Abundances (Scaled): F5: Sample	Abundances (Scaled): F6: Sample	Abundances (Scaled): F7: Sample	Abundances (Scaled): F8: Sample	Abundances (Scaled): F9: Sample	Abundances (Scaled): F10: Sample	Abundances (Scaled): F11: Sample	Abundances (Scaled): F12: Sample	Abundances (Scaled): F13: Sample	Abundances (Scaled): F14: Sample	Abundances (Scaled): F15: Sample	Abundances (Scaled): F16: Sample	Abundances (Scaled): F17: Sample	Abundances (Scaled): F18: Sample	Quan Info	Found in Sample: [S1] F1: Sample	Found in Sample: [S2] F2: Sample	Found in Sample: [S3] F3: Sample	Found in Sample: [S4] F4: Sample	Found in Sample: [S5] F5: Sample	Found in Sample: [S6] F6: Sample	Found in Sample: [S7] F7: Sample	Found in Sample: [S8] F8: Sample	Found in Sample: [S9] F9: Sample	Found in Sample: [S10] F10: Sample	Found in Sample: [S11] F11: Sample	Found in Sample: [S12] F12: Sample	Found in Sample: [S13] F13: Sample	Found in Sample: [S14] F14: Sample	Found in Sample: [S15] F15: Sample	Found in Sample: [S16] F16: Sample	Found in Sample: [S17] F17: Sample
	FALSE	High	[R].QKMELNEAWEDLQGR.[T]			1	1	1	P02549	P02549 [1263-1277]	1	1846.88	0							19.4		30.2			706	22.7				1000.4	21.2		Not Found	Not Found	Not Found	Not Found	Not Found	Not Found	Peak Found	Not Found	Peak Found	Not Found	Not Found	Peak Found	Peak Found	Not Found	Not Found	Not Found	High
	FALSE	High	[R].QKALSNAANLQR.[F]			1	1	2	P02549	P02549 [257-268]	1	1313.73	0												1703.2					96.8			Not Found	Not Found	Not Found	Not Found	Not Found	Not Found	Not Found	Not Found	Not Found	Not Found	Not Found	High	Not Found	Not Found	Not Found	Not Found	Peak Found
	FALSE	High	[R].QLLGSAHAVEVFHR.[E]			1	1	1	P02549	P02549 [1177-1190]	0	1563.84	0							219.7			126.6	84.8	942.8					426.1			Not Found	Not Found	Not Found	Not Found	Not Found	Not Found	Peak Found	Not Found	Not Found	Peak Found	Peak Found	High	Not Found	Not Found	Not Found	Not Found	Peak Found
	FALSE	High	[K].QDTLDASLQSFQQER.[L]			1	1	12	P02549	P02549 [1970-1984]	0	1765.84	0		144.5		6.5		4.1	240.2	80.4	12.2	33.7	58.3	236.5		523.4	44.6	70.7	342.3	2.7		Not Found	High	Not Found	Peak Found	Not Found	Peak Found	High	High	Peak Found	Peak Found	Peak Found	High	Not Found	High	Peak Found	Peak Found	High
	FALSE	High	[R].QDQVDILTDLAAYFEEIGHPDSK.[D]			1	1	5	P02549	P02549 [740-762]	0	2604.25	0							292	43.9	33	517.9					255.5		657.8			Not Found	Not Found	Not Found	Not Found	Not Found	Not Found	High	Peak Found	Peak Found	High	Not Found	Not Found	Not Found	Not Found	Peak Found	Not Found	High
	FALSE	High	[R].QEAFLENEDLGNSLGSAEALLQK.[H]			1	1	5	P02549	P02549 [495-517]	0	2476.22	0		207.7	17.8			7.5	454.4	74.4		36.3	114.4	41.1		250.4	92.3		501.1	2.5		Not Found	Peak Found	Peak Found	Not Found	Not Found	High	High	Peak Found	Not Found	High	Peak Found	Peak Found	Not Found	Peak Found	Peak Found	Not Found	Peak Found
	FALSE	High	[R].QEQIENQYR.[S]			1	1	5	P02549	P02549 [1057-1065]	0	1207.57	0	17.9	279.6	27.4	2.9	11.5		177	19.4	0.6	6	4.6	273.5	1.1	586.9	45.1	18.4	307.3	20.7		Peak Found	High	Peak Found	Peak Found	Peak Found	Not Found	Peak Found	Peak Found	Peak Found	Peak Found	Peak Found	Peak Found	Peak Found	Peak Found	High	High	Peak Found
	FALSE	High	[R].NLAVMSDKVK.[E]			1	1	8	P02549	P02549 [312-321]	1	1104.61	0							138.9	185				1065.7		37.8	29.8		342.8			Not Found	Not Found	Not Found	Not Found	Not Found	Not Found	High	High	Not Found	Not Found	Not Found	High	Not Found	Peak Found	Peak Found	Not Found	High
	FALSE	High	[R].NLAVMSDK.[V]			1	1	3	P02549	P02549 [312-319]	0	877.445	0		129				6.1	124.1	370	12.1	3.5		272.3		459.3	52.4		318.8	52.6		Not Found	Peak Found	Not Found	Not Found	Not Found	Peak Found	Peak Found	Peak Found	Peak Found	Peak Found	Not Found	High	Not Found	High	Peak Found	Not Found	High
	FALSE	High	[R].NQANACQQQQAAPVEGVAGEQR.[V]	1xCarbamidomethyl [C6]		1	1	14	P02549	P02549 [960-981]	0	2354.09	0		427	15.1	5.6		20.6	36.7	514.5		31.5	59.2	67.5		464.6	40.7	74	43.1			Not Found	High	Peak Found	Peak Found	Not Found	High	High	High	Not Found	High	Peak Found	High	Not Found	High	Peak Found	Peak Found	High
	FALSE	High	[K].RWEQLLEASAVHR.[Q]			1	1	2	P02549	P02549 [2016-2028]	1	1594.84	0		278.8			587.5	495		250.9				84.8	70.6				32.4			Not Found	Peak Found	Not Found	Not Found	Peak Found	High	Not Found	Peak Found	Not Found	Not Found	Not Found	Peak Found	Peak Found	Not Found	Not Found	Not Found	Peak Found
	FALSE	High	[R].RQNDLEANVQFQQYLADLHEAETWIR.[E]			1	1	4	P02549	P02549 [891-916]	1	3187.56	0						177.7	301.5		6.8	471.1							842.8			Not Found	Not Found	Not Found	Not Found	Not Found	High	Peak Found	Not Found	Peak Found	High	Not Found	Not Found	Not Found	Not Found	Not Found	Not Found	Peak Found
	FALSE	High	[R].RREEPGNITQR.[Q]			1	1	2	P02549	P02549 [1046-1056]	2	1355.71	0		7.8				294.3									1450.2		47.7			Not Found	Peak Found	Not Found	Not Found	Not Found	Peak Found	Not Found	Not Found	Not Found	Not Found	Not Found	Not Found	Not Found	Not Found	High	Not Found	Peak Found
	FALSE	High	[R].SDDKSSLDSLEALMK.[K]	1xOxidation [M14]		1	1	5	P02549	P02549 [1420-1434]	1	1654.78	1		357.7			15.7	2.5	188.4	107.1	6.5	11.5	32.8	371		233.7	41.3	185.8	240.9	5		Not Found	High	Not Found	Not Found	Peak Found	Peak Found	Peak Found	High	Peak Found	Peak Found	Peak Found	High	Not Found	Peak Found	Peak Found	Peak Found	Peak Found
	FALSE	High	[R].SDDKSSLDSLEALMK.[K]			1	1	8	P02549	P02549 [1420-1434]	1	1638.79	0		377.8					220.4	95.7			30.1	466.4		101	52.3	17.8	438.3			Not Found	High	Not Found	Not Found	Not Found	Not Found	High	High	Not Found	Not Found	Peak Found	Peak Found	Not Found	Peak Found	Peak Found	Peak Found	High
	FALSE	High	[K].QNEVNAAWER.[L]			1	1	8	P02549	P02549 [239-248]	0	1216.57	0		1099.9		247.1	7.2				144.4	83.4		5.5		26.9	125.9		14.9	44.8		Not Found	High	Not Found	Peak Found	Peak Found	Not Found	High	Peak Found	Peak Found	Peak Found	Not Found	Peak Found	Peak Found	High	High	Not Found	High
	FALSE	High	[R].RLAHDEFPMLPQR.[R]	1xOxidation [M9]		1	1	3	P02549	P02549 [1033-1045]	1	1625.82	0		18.3		3.9		1.6	299.4	10				1033.9	15.6		29		386.4	1.9		Not Found	Peak Found	Not Found	Peak Found	Not Found	Peak Found	High	Peak Found	Not Found	Not Found	Not Found	High	Peak Found	Not Found	Peak Found	Not Found	High
	FALSE	High	[R].RLAHDEFPMLPQR.[R]			1	1	1	P02549	P02549 [1033-1045]	1	1609.83	0	84.8	578.6	489.6	10.5	86.3	7.8	63	10.1				236.4		12		78	122.6	20.2		Peak Found	Peak Found	Peak Found	Peak Found	Peak Found	Peak Found	Peak Found	Peak Found	Not Found	Not Found	Not Found	High	Not Found	Peak Found	Not Found	Peak Found	Peak Found
	FALSE	High	[K].RDDLDKAITAQEGK.[I]			1	1	2	P02549	P02549 [1436-1449]	2	1559.8	0		21.9				34.4	120	105.4				1165.2	19.4		45.6		271.2	16.8		Not Found	Peak Found	Not Found	Not Found	Not Found	Peak Found	Peak Found	Peak Found	Not Found	Not Found	Not Found	High	Peak Found	Not Found	Peak Found	Not Found	High
	FALSE	High	[R].REEPGNITQR.[Q]			1	1	2	P02549	P02549 [1047-1056]	1	1199.61	0												9.8			1443.9			346.3		Not Found	Not Found	Not Found	Not Found	Not Found	Not Found	Not Found	Not Found	Not Found	Not Found	Not Found	Peak Found	Not Found	Not Found	High	Not Found	Not Found
	FALSE	High	[K].LQLEDDYAFQEFNWK.[A]			1	1	7	P02549	P02549 [1922-1936]	0	1945.9	0				2.2		16.1	609.8	156.1		49.8	184.6			81	33.6		666.9			Not Found	Not Found	Not Found	Peak Found	Not Found	High	High	High	Not Found	Peak Found	Peak Found	Not Found	Not Found	Peak Found	Peak Found	Not Found	High
	FALSE	High	[R].IQEITER.[G]			1	1	6	P02549	P02549 [849-855]	0	888.479	0							217.9	126.7			14.3	42.3	3.8	1034.6	1.8		358.7			Not Found	Not Found	Not Found	Not Found	Not Found	Not Found	High	High	Not Found	Not Found	Peak Found	High	Peak Found	High	Peak Found	Not Found	Peak Found
	FALSE	High	[K].LQAVKLER.[D]			1	1	4	P02549	P02549 [1370-1377]	1	956.589	0							102.4	65.3				1328.8					303.5			Not Found	Not Found	Not Found	Not Found	Not Found	Not Found	High	Peak Found	Not Found	Not Found	Not Found	High	Not Found	Not Found	Not Found	Not Found	High
	FALSE	High	[K].LQATYWYHR.[F]			1	1	6	P02549	P02549 [366-374]	0	1237.61	0			7.1		2	168	198.4	68.6	9.4	31.1		794.7	3.6		46.7	82.3	319.6	68.6		Not Found	Not Found	Peak Found	Not Found	Peak Found	High	High	Peak Found	Peak Found	Peak Found	Not Found	High	Peak Found	Not Found	Peak Found	Peak Found	High
	FALSE	High	[R].LSEVASLWEELLEATK.[Q]			1	1	14	P02549	P02549 [662-677]	0	1817.95	0				12.4		157	333.4	79.3	47.1	237		103.7	20.8	34.7	114.6	76.2	581.2	2.7		Not Found	Not Found	Not Found	Peak Found	Not Found	High	High	Peak Found	High	High	Not Found	High	Peak Found	Peak Found	High	Peak Found	High
	FALSE	High	[R].LSESHPDATEDLQR.[Q]			1	1	18	P02549	P02549 [1249-1262]	0	1597.75	0	2.1	669	8.1	1.9	60.7	2.2	108.4	71.1	6.1	23.3	6.1	164.3	6.6	121.3	68.9	11	451.6	17.3		Peak Found	High	Peak Found	Peak Found	Peak Found	High	High	High	High	Peak Found	Peak Found	High	Peak Found	Peak Found	High	Peak Found	High
	FALSE	High	[R].LPEITDLKDK.[L]			1	1	5	P02549	P02549 [1985-1994]	1	1171.66	0	60.6	92.7	37.4	9.7	91.9		160.1	179.5	9.9	14.2		500.7	2.7	193.7	77.2		369.8			Peak Found	High	Peak Found	Peak Found	Peak Found	Not Found	Peak Found	Peak Found	Peak Found	Peak Found	Not Found	High	Peak Found	Peak Found	Peak Found	Not Found	High
	FALSE	High	[R].LPEITDLK.[D]			1	1	2	P02549	P02549 [1985-1992]	0	928.535	0						18	99.8	234.9	31.6	13.2		352.3		677	89.3		283.9			Not Found	Not Found	Not Found	Not Found	Not Found	Peak Found	Peak Found	Peak Found	Peak Found	Peak Found	Not Found	High	Not Found	High	Peak Found	Not Found	Peak Found
	FALSE	High	[R].LMSELEKTREER.[F]	1xOxidation [M2]		1	1	2	P02549	P02549 [107-118]	2	1536.77	0							540.3					421.4					838.3			Not Found	Not Found	Not Found	Not Found	Not Found	Not Found	Peak Found	Not Found	Not Found	Not Found	Not Found	High	Not Found	Not Found	Not Found	Not Found	High
	FALSE	High	[R].LMSELEK.[T]			1	1	6	P02549	P02549 [107-113]	0	849.439	0		76.1				1.9	79.3	176.5		8.1		828.6		330.4	42.5		256.5			Not Found	High	Not Found	Not Found	Not Found	Peak Found	Peak Found	High	Not Found	Peak Found	Not Found	High	Not Found	High	Peak Found	Not Found	Peak Found
	FALSE	High	[K].MEENLSEPVHCVSLNEIR.[Q]	1xCarbamidomethyl [C11]		1	1	3	P02549	P02549 [2062-2079]	0	2156.01	0		218.1			204.8			107.1			885.5			227			157.4			Not Found	Peak Found	Not Found	Not Found	Peak Found	Not Found	Not Found	High	Not Found	Not Found	Peak Found	Not Found	Not Found	Peak Found	Not Found	Not Found	Peak Found
	FALSE	High	[K].MEENLSEPVHCVSLNEIR.[Q]	1xCarbamidomethyl [C11]; 1xOxidation [M1]		1	1	1	P02549	P02549 [2062-2079]	0	2172.01	0			315.2		36.9	13.1	31.6	53.3	5.7		278.4	175.8		749.1	72.9		67.8			Not Found	Not Found	Peak Found	Not Found	Peak Found	Peak Found	Peak Found	High	Peak Found	Not Found	Peak Found	Peak Found	Not Found	Peak Found	Peak Found	Not Found	Peak Found
	FALSE	High	[K].MELNEAWEDLQGR.[T]	1xOxidation [M1]		1	1	7	P02549	P02549 [1265-1277]	0	1606.72	0							278.4	295				363.6		161	57.7	111.7	532.6			Not Found	Not Found	Not Found	Not Found	Not Found	Not Found	High	High	Not Found	Not Found	Not Found	High	Not Found	Peak Found	Peak Found	Peak Found	High
	FALSE	High	[K].MELNEAWEDLQGR.[T]			1	1	6	P02549	P02549 [1265-1277]	0	1590.72	0	94.8	512.4					249.7	135	33.4			221		23.3	56.6		473.9			Peak Found	High	Not Found	Not Found	Not Found	Not Found	High	Peak Found	Peak Found	Not Found	Not Found	High	Not Found	Peak Found	Peak Found	Not Found	High
	FALSE	High	[-].MEQFPKETVVESSGPK.[V]	1xAcetyl [N-Term]	P02549 1xAcetyl [N-Term]	1	1	1	P02549	P02549 [1-16]	1	1834.89	0		55.8	52.7				44.2	26	90.2		44.3	127.9	81.5	1153.1			124.2			Not Found	Peak Found	Peak Found	Not Found	Not Found	Not Found	Peak Found	Peak Found	Peak Found	Not Found	Peak Found	Peak Found	Peak Found	High	Not Found	Not Found	Peak Found
	FALSE	High	[K].LYEDSDDLK.[N]			1	1	5	P02549	P02549 [587-595]	0	1097.5	0		189	44.2	23.4			185.8	276.8	17.1	95.2	44.8	125.3		494.7	71	23.9	208.7			Not Found	High	Peak Found	Peak Found	Not Found	Not Found	High	High	Peak Found	Peak Found	Peak Found	Peak Found	Not Found	High	Peak Found	Peak Found	Peak Found
	FALSE	High	[R].MQHNLEQQIQAK.[D]			1	1	17	P02549	P02549 [2252-2263]	0	1467.74	0		144.7					200.3	195.8				757.2		52	73.6		376.4			Peak Found	High	Not Found	Peak Found	Not Found	Not Found	High	High	Not Found	Peak Found	Not Found	High	Peak Found	High	Peak Found	Not Found	High
	FALSE	High	[R].MQHNLEQQIQAK.[D]	1xOxidation [M1]		1	1	6	P02549	P02549 [2252-2263]	0	1483.73	0	199.3	68.2			715.4	1.2	241.4	221.6				180	2.3	25.7	4.6	11.2	129.1			Peak Found	Peak Found	Not Found	Not Found	Peak Found	Peak Found	Peak Found	Peak Found	Not Found	Not Found	Not Found	High	Peak Found	Peak Found	Peak Found	Peak Found	High
	FALSE	High	[K].MVEEGHFAAEDVASR.[V]	1xOxidation [M1]		1	1	9	P02549	P02549 [859-873]	0	1663.74	0		128.7	18.8			16.2	346.4	320.4	4.9	2.4	38.2	345.4		115.2	21.1	2	440.3			Not Found	High	Peak Found	Not Found	Not Found	Peak Found	High	High	Peak Found	Peak Found	Peak Found	High	Not Found	Peak Found	Peak Found	Peak Found	High
	FALSE	High	[K].MVEEGHFAAEDVASR.[V]			1	1	17	P02549	P02549 [859-873]	0	1647.74	0		321.8	87.4	1.6		14.7	252.2	258.6		6.2	2.5	257.7	1.2	68.5	59.9		462.2	5.5		Not Found	High	Peak Found	Peak Found	Not Found	High	High	High	Not Found	High	Peak Found	High	Peak Found	Peak Found	High	Not Found	High
	FALSE	High	[K].LTLSHPSDAPQIQEMK.[E]			1	1	2	P02549	P02549 [330-345]	0	1794.91	0							262.8	496.7	10.2	11.1		343.9		124.4	42.9		508			Not Found	Not Found	Not Found	Not Found	Not Found	Not Found	Peak Found	Peak Found	Peak Found	Peak Found	Not Found	High	Not Found	Peak Found	Peak Found	Not Found	High
	FALSE	High	[K].ITDLEHFAESLIADEHYAK.[E]			1	1	3	P02549	P02549 [1450-1468]	0	2202.07	0				25.9		1178.7			233	165.3		50.9	24.3		35.8	86				Not Found	Not Found	Not Found	Peak Found	Not Found	High	Not Found	Not Found	High	Peak Found	Not Found	Peak Found	Peak Found	Not Found	Peak Found	Peak Found	Not Found
	FALSE	High	[K].IVDLGDNLEDALILDIK.[Y]			1	1	18	P02549	P02549 [2216-2232]	0	1869.02	0		46.6	95.7			22.1	201.2	42		32.4	213.4	29.4		42.2	145.8	99.8	829.3			Not Found	Peak Found	Peak Found	Not Found	Not Found	High	High	High	Not Found	High	High	High	Not Found	High	Peak Found	High	High
	FALSE	High	[R].VILENIASHEPR.[I]			1	1	13	P02549	P02549 [837-848]	0	1377.75	0	134.3	69.8	5	10.7	1.9	3.7	227.9	97.9	73.2	24.9		395.9	7.5	7.5	128	0.5	596.9	14.3		Peak Found	High	Peak Found	Peak Found	Peak Found	Peak Found	High	High	Peak Found	Peak Found	Not Found	High	Peak Found	Peak Found	Peak Found	Peak Found	High
	FALSE	High	[K].VLQEESQNKEISSK.[I]			1	1	18	P02549	P02549 [1889-1902]	1	1618.83	0	330.3	151.8				1.6	105.5	188.5	0.4			281.3		519.4			221.2			Peak Found	High	Not Found	Not Found	Not Found	Peak Found	High	High	Peak Found	Not Found	Not Found	High	Not Found	High	Not Found	Not Found	High
	FALSE	High	[K].VLETAEEIQER.[R]			1	1	20	P02549	P02549 [17-27]	0	1316.67	0	0.3	4.6					79.1	69	0.8			555.7		908.3	49.2		133			Peak Found	High	Peak Found	Peak Found	Peak Found	High	High	High	High	Peak Found	High	High	Peak Found	High	High	Peak Found	High
	FALSE	High	[R].VQNVCAQGEDILNK.[V]	1xCarbamidomethyl [C5]		1	1	10	P02549	P02549 [1875-1888]	0	1587.78	0		218	18.9	2.1	48.1	26.8	70.2	388.3	6	25.7		265.4		462.1	43	8	196.5	20.9		Not Found	High	Peak Found	Peak Found	Peak Found	High	High	High	Peak Found	Peak Found	Not Found	High	Not Found	Peak Found	Peak Found	Peak Found	High
	FALSE	High	[K].VNILTDKSYEDPTNIQGK.[Y]			1	1	3	P02549	P02549 [73-90]	1	2035.03	0						5.8	166.7	38.1				592.2		592.9	56.6		342	5.6		Not Found	Not Found	Not Found	Not Found	Not Found	Peak Found	High	Peak Found	Not Found	Not Found	Not Found	High	Not Found	Peak Found	Peak Found	Not Found	Peak Found
	FALSE	High	[K].VNILTDK.[S]			1	1	5	P02549	P02549 [73-79]	0	802.467	0							70.1	100.6				835.3		595.4			198.6			Not Found	Not Found	Not Found	Not Found	Not Found	Not Found	High	Peak Found	Not Found	Not Found	Not Found	High	Not Found	High	Not Found	Not Found	Peak Found
	FALSE	High	[R].VMALYDFQAR.[S]	1xOxidation [M2]		1	1	8	P02549	P02549 [982-991]	0	1229.6	0		125.8					332.8	189		37.9		207.3		130.4	183.6		593.1			Not Found	Peak Found	Not Found	Not Found	Not Found	Not Found	High	High	Not Found	Peak Found	Not Found	High	Not Found	Peak Found	High	Not Found	High
	FALSE	High	[R].VMALYDFQAR.[S]			1	1	6	P02549	P02549 [982-991]	0	1213.6	0	121.9	288.2	64			7.6	220.1	153.9	23.1	35		167.8	7.4	43.6	149.6		517.8			Peak Found	High	Peak Found	Not Found	Not Found	Peak Found	Peak Found	Peak Found	Peak Found	Peak Found	Not Found	High	Peak Found	Peak Found	High	Not Found	High
	FALSE	High	[K].VEAADHQGIVPAVYVR.[R]			1	1	9	P02549	P02549 [1017-1032]	0	1723.91	0	1.2	67.2		2.4		0.4	161.8	339.9	14.1			375.7	2.8	424.5	3.2		405.9	0.8		Peak Found	High	Not Found	Peak Found	Not Found	Peak Found	High	Peak Found	Peak Found	Not Found	Not Found	High	Peak Found	Peak Found	High	Not Found	High
	FALSE	High	[K].VADDLLFEGLLTPEGAQIR.[Q]			1	1	17	P02549	P02549 [1140-1158]	0	2057.09	0		102.6	9.6			13.5	418.3	52.1	2.8	5.7	30	131.1		109.5	63.7	22.6	834	4.6		Not Found	High	High	Not Found	Not Found	High	Peak Found	High	Peak Found	High	High	High	Not Found	High	Peak Found	Peak Found	High
	FALSE	High	[K].YSTIGLAQQWDQLYQLGLR.[M]			1	1	7	P02549	P02549 [2233-2251]	0	2253.17	0		27.5				25.4	394.7	48.4	7	10.3	296	273.2		23.4	23.9	18	648.1	4.1		Not Found	Peak Found	Not Found	Not Found	Not Found	High	High	Peak Found	Peak Found	Peak Found	Peak Found	High	Not Found	Peak Found	Peak Found	Peak Found	High
	FALSE	High	[K].YQKHQSLEAEVQTK.[S]			1	1	1	P02549	P02549 [91-104]	1	1688.86	0							403.5					477.8			163.5		739.1	16.1		Not Found	Not Found	Not Found	Not Found	Not Found	Not Found	Peak Found	Not Found	Not Found	Not Found	Not Found	High	Not Found	Not Found	Peak Found	Not Found	Peak Found
	FALSE	High	[K].VTILGETAER.[L]			1	1	11	P02549	P02549 [1239-1248]	0	1088.59	0	738.5	115.7	4.8		3.4	36	67.4	112.7		59.4		155.2	70.8	243.4	51.1		127.8	13.6		Peak Found	High	Peak Found	Not Found	Peak Found	High	High	High	Not Found	Peak Found	Not Found	Peak Found	Peak Found	High	Peak Found	Not Found	High
	FALSE	High	[R].VSSQDYGRDLQGVQNLLK.[K]			1	1	1	P02549	P02549 [1736-1753]	1	2020.05	0				6.9			476.2			6.2		242.1		38.1			1030.5			Not Found	Not Found	Not Found	Peak Found	Not Found	Not Found	Peak Found	Not Found	Not Found	Peak Found	Not Found	Peak Found	Not Found	Peak Found	Not Found	Not Found	High
	FALSE	High	[R].WEQLLEASAVHR.[Q]			1	1	2	P02549	P02549 [2017-2028]	0	1438.74	0		35.9				82.3	780.9	233							55.9		611.9			Not Found	Peak Found	Not Found	Not Found	Not Found	Peak Found	High	Peak Found	Not Found	Not Found	Not Found	Not Found	Not Found	Not Found	Peak Found	Not Found	High
	FALSE	High	[R].YAALLKR.[W]			1	1	6	P02549	P02549 [2010-2016]	1	834.52	0			8.5				253.8	82.3				421.4		41.7		33.3	958.9			Not Found	Not Found	Peak Found	Not Found	Not Found	Not Found	High	High	Not Found	Not Found	Not Found	High	Not Found	Peak Found	Not Found	Peak Found	High
	FALSE	High	[R].VVEVNQYANECAEENHPDLPLIQSK.[Q]	1xCarbamidomethyl [C11]		1	1	2	P02549	P02549 [214-238]	0	2896.38	0			43.8				193.9	163.8		46.5	414.2	227.2		243.3	9.1	183.3	274.9			Not Found	Not Found	Peak Found	Not Found	Not Found	Not Found	High	High	Not Found	Peak Found	Peak Found	Peak Found	Not Found	Peak Found	Peak Found	Peak Found	Peak Found
	FALSE	High	[K].SSDEIENAFQALAEGK.[S]			1	1	16	P02549	P02549 [2353-2368]	0	1708.8	0	13.4	34.9	10.7	0.5	9	15.3	137.9	79.4	2.2	5.6	468.2	418.5	0.8	285	24.8	31.4	260.7	1.7		Peak Found	Peak Found	Peak Found	Peak Found	Peak Found	High	High	High	Peak Found	High	Peak Found	High	Peak Found	High	Peak Found	High	High
	FALSE	High	[K].SSLDSLEALMK.[K]			1	1	2	P02549	P02549 [1424-1434]	0	1193.61	0		685.7			28.1		173.2	192.9				350.6		210.4			159.1			Not Found	Peak Found	Not Found	Not Found	Peak Found	Not Found	Peak Found	Peak Found	Not Found	Not Found	Not Found	High	Not Found	Peak Found	Not Found	Not Found	Peak Found
	FALSE	High	[K].SYITKEDMK.[Q]			1	1	8	P02549	P02549 [2369-2377]	1	1114.54	0		113.9	95.6				254.8	219.3		1.4		554.8		101.2			458.8			Not Found	High	Peak Found	Not Found	Not Found	Not Found	High	High	Not Found	Peak Found	Not Found	High	Not Found	Peak Found	Not Found	Not Found	Peak Found
	FALSE	High	[K].SYEDPTNIQGK.[Y]			1	1	12	P02549	P02549 [80-90]	0	1251.59	0		5.4		6.4	2.7	3.9	64	89.8	6.2	16.5	35.3	614.9		739.7	75	18.6	106.7	14.9		Not Found	Peak Found	Not Found	Peak Found	Peak Found	Peak Found	High	High	Peak Found	High	Peak Found	High	Not Found	High	Peak Found	Peak Found	High
	FALSE	High	[R].SHLSGYDYVGFTNSYFGN.[-]			1	1	5	P02549	P02549 [2402-2419]	0	2027.88	0		28.1	41.7				365.6	78.3		19.9	280.8	203.8		71.9	31.4		678.6			Not Found	Peak Found	Peak Found	Not Found	Not Found	Not Found	High	High	Not Found	Peak Found	Peak Found	Peak Found	Not Found	Peak Found	Peak Found	Not Found	High
	FALSE	High	[K].SLNQNMESLR.[A]	1xOxidation [M6]		1	1	8	P02549	P02549 [876-885]	0	1207.57	0							333.6	429.5				184.9		278.9			573			Not Found	Not Found	Not Found	Not Found	Not Found	Not Found	High	High	Not Found	Not Found	Not Found	Peak Found	Not Found	High	Not Found	Not Found	High
	FALSE	High	[K].SLNQNMESLR.[A]			1	1	8	P02549	P02549 [876-885]	0	1191.58	0	2.4						213	287.4				375.2		291.9	93		537.1			Peak Found	High	Not Found	Peak Found	Peak Found	Not Found	High	High	Peak Found	Peak Found	Not Found	High	Peak Found	High	High	Peak Found	Peak Found
	FALSE	High	[R].SLLDRAEER.[R]			1	1	6	P02549	P02549 [1066-1074]	1	1088.57	1		153.3	53.5		62		257.2	34.1			18.4	637.5		19.4	175.9		384.5	4.3		Not Found	High	Peak Found	Not Found	Peak Found	Not Found	High	Peak Found	Not Found	Not Found	Peak Found	High	Not Found	Peak Found	High	Not Found	Peak Found
	FALSE	High	[K].TAAINADELPTDVAGGEVLLDR.[H]			1	1	14	P02549	P02549 [390-411]	0	2240.14	0			5.3		1		271.1	284		6.2	22.2	269.9		386.6	37	31.4	485.4			Not Found	Not Found	Peak Found	Not Found	Peak Found	Not Found	High	High	Not Found	High	Peak Found	Peak Found	Not Found	High	High	High	High
	FALSE	High	[K].TQLENIQK.[T]			1	1	8	P02549	P02549 [635-642]	0	973.531	0			24.5				167.2	201.3			3.3	193.9		912.9			295.2	1.7		Not Found	High	Peak Found	Not Found	Peak Found	Not Found	High	Peak Found	Peak Found	Not Found	Peak Found	High	Not Found	High	Peak Found	Peak Found	High
	FALSE	High	[K].TGQEMIEGGHYASDNVTTR.[L]	1xOxidation [M5]		1	1	13	P02549	P02549 [643-661]	0	2081.92	0	4.2	57.7		6.8		16.4	450.1	70.9			13.9	404.7		349	103.5		322.7			Peak Found	Peak Found	Not Found	Peak Found	Not Found	Peak Found	High	High	Not Found	Not Found	Peak Found	High	Not Found	High	High	Not Found	High
	FALSE	High	[K].TGQEMIEGGHYASDNVTTR.[L]			1	1	17	P02549	P02549 [643-661]	0	2065.92	0	3.6	220.5			17.1	18	229	73.3	4.3	13		527.4		274.1	20.7	22.1	371	5.9		Peak Found	High	Not Found	Not Found	Peak Found	Peak Found	High	High	Peak Found	Peak Found	Not Found	High	Not Found	High	Peak Found	Peak Found	High
	FALSE	High	[R].TKLGDYANLK.[Q]			1	1	4	P02549	P02549 [1494-1503]	1	1122.62	0							164					1162.2			120.1		353.7			Not Found	Not Found	Not Found	Not Found	Not Found	Not Found	High	Not Found	Not Found	Not Found	Not Found	High	Not Found	Not Found	Peak Found	Not Found	High
	FALSE	High	[K].EDLVSSWEHIR.[A]			1	1	9	P02549	P02549 [346-356]	0	1370.67	0	649.5	24.1		6.4		71.6	193.1	165.5	25.7	7.8		259.4			23		365.5	8.5		Peak Found	Peak Found	Not Found	Peak Found	Not Found	High	High	High	Peak Found	Peak Found	Not Found	High	Not Found	Not Found	Peak Found	Not Found	High
	FALSE	High	[R].EDALKDLNTLAEDLLSSGTFNVDQIVK.[K]			1	1	4	P02549	P02549 [1660-1686]	1	2948.51	0							405.9					781.3					579.8	33		Not Found	Not Found	Not Found	Not Found	Not Found	Not Found	High	Not Found	Not Found	Not Found	Not Found	High	Not Found	Not Found	Not Found	Not Found	Peak Found
	FALSE	High	[K].ELAVNKTQLENIQK.[T]			1	1	1	P02549	P02549 [629-642]	1	1627.9	0					161		154.8	92.7				994.4		64.3			332.8			Not Found	Not Found	Not Found	Not Found	Peak Found	Not Found	Peak Found	High	Not Found	Not Found	Not Found	Peak Found	Not Found	Peak Found	Not Found	Not Found	Peak Found
	FALSE	High	[K].EKEPVLTSEDYGK.[D]			1	1	14	P02549	P02549 [282-294]	1	1494.73	0		407.4				18.2	130.4	376.1	26	38		170.7		374.8	40		207.9	10.6		Not Found	High	Not Found	Not Found	Not Found	Peak Found	High	High	Peak Found	Peak Found	Not Found	High	Not Found	High	High	Not Found	High
	FALSE	High	[R].EKEPIVDNTNYGADEEAAGALLK.[K]			1	1	9	P02549	P02549 [917-939]	1	2447.19	0		389				5.3	180.2	299.5		16.6		280.3	4.2	279.6	36.7		308.8			Not Found	High	Not Found	Not Found	Not Found	Peak Found	High	High	Not Found	High	Not Found	High	Peak Found	High	High	Not Found	High
	FALSE	High	[R].DSEQVDSWMSR.[Q]	1xOxidation [M9]		1	1	13	P02549	P02549 [484-494]	0	1355.55	0		196.4	11.3		2.5		212.3	196		1.1	12	496.2	9.8	345.1	50.5	5.8	260.9			Not Found	High	Peak Found	Not Found	Peak Found	Not Found	High	High	Not Found	Peak Found	Peak Found	High	Peak Found	High	High	Peak Found	High
	FALSE	High	[R].DSEQVDSWMSR.[Q]			1	1	9	P02549	P02549 [484-494]	0	1339.56	0	38.5	578.4	3.5			26	91.4	265.9	10.9	4		265.2	1.3	283.8	43.7		180.6	6.8		Peak Found	High	Peak Found	Not Found	Not Found	High	High	Peak Found	Peak Found	Peak Found	Not Found	High	Peak Found	High	High	Not Found	High
	FALSE	High	[R].DLVPLGDKVTILGETAER.[L]			1	1	13	P02549	P02549 [1231-1248]	1	1926.05	0		128.9		5.1		3.7	326.1	125.9	1.8	1.2		431.7	2.4	51	51.2		667.4	3.5		Not Found	High	Not Found	Peak Found	Not Found	Peak Found	High	High	Peak Found	Peak Found	Not Found	High	Peak Found	Peak Found	High	Not Found	High
	FALSE	High	[R].DLVPLGDK.[V]			1	1	1	P02549	P02549 [1231-1238]	0	856.477	0							98.3	252.4		31.5		336.3		695.6	109.3		276.6			Not Found	Not Found	Not Found	Not Found	Not Found	Not Found	Peak Found	Peak Found	Not Found	Peak Found	Not Found	Peak Found	Not Found	High	Peak Found	Not Found	Peak Found
	FALSE	High	[K].DLVASEGLFHSHK.[G]			1	1	1	P02549	P02549 [295-307]	0	1439.73	0				57.8			126.2	93.3	302.9	162.6		499	66.4		92.7		364.9	34.1		Not Found	Not Found	Not Found	Peak Found	Not Found	Not Found	Peak Found	Peak Found	Peak Found	Peak Found	Not Found	High	Peak Found	Not Found	Peak Found	Not Found	Peak Found
	FALSE	High	[R].DVTEAIQWIK.[E]			1	1	5	P02549	P02549 [272-281]	0	1202.64	0		200	0.8		1.8	23.2	266.9	198.2	7.1	28.5	8.5	260.9		349	63.2	47.3	339.5	5		Not Found	High	Peak Found	Not Found	Peak Found	High	Peak Found	High	Peak Found	Peak Found	Peak Found	Peak Found	Not Found	Peak Found	Peak Found	Peak Found	High
	FALSE	High	[K].FDEFQK.[D]			1	1	4	P02549	P02549 [1120-1125]	0	813.378	0							138.2	143.5				446.9		656.2		6.2	409.1			Not Found	High	Not Found	Not Found	Not Found	Not Found	High	High	Not Found	Not Found	Not Found	High	Not Found	Peak Found	Not Found	Peak Found	Peak Found
	FALSE	High	[K].FDEFQKDLNTNEPR.[L]			1	1	7	P02549	P02549 [1120-1133]	1	1752.82	0		14.6					254.7	60				648.6		76.8	98.4		612.3	34.6		Not Found	High	Peak Found	Not Found	Peak Found	Not Found	High	Peak Found	Not Found	Peak Found	Not Found	High	Not Found	Peak Found	Peak Found	Not Found	High
	FALSE	High	[K].FLDAVDPGRK.[G]			1	1	5	P02549	P02549 [2322-2331]	1	1117.6	0							114.9	80.6		11.8		994		49.7	78.6	8.9	461.5			Not Found	Not Found	Not Found	Not Found	Not Found	Not Found	High	Peak Found	Not Found	Peak Found	Not Found	High	Not Found	Peak Found	Peak Found	Peak Found	High
	FALSE	High	[K].FLDAVDPGR.[K]			1	1	9	P02549	P02549 [2322-2330]	0	989.505	0	3.1	3.3		3.4		22.4	197	133.7	62.5	17.2	13.7	517.2	7.2	290.6	97.4	8.2	411.2	12		Peak Found	Peak Found	Not Found	Peak Found	Not Found	Peak Found	High	High	Peak Found	High	Peak Found	High	Peak Found	High	Peak Found	Peak Found	High
	FALSE	High	[K].FEDFQVELVAK.[E]			1	1	1	P02549	P02549 [200-210]	0	1324.68	0	70.1			20.1	99	9.8	282.9	69.9		101.5	113.3	65.5	3.2	152.4	187.1	139.1	486			Peak Found	Not Found	Not Found	Peak Found	Peak Found	Peak Found	High	Peak Found	Not Found	Peak Found	Peak Found	Peak Found	Peak Found	Peak Found	Peak Found	Peak Found	Peak Found
	FALSE	High	[R].FEALKEPLATRK.[K]			1	1	1	P02549	P02549 [775-786]	2	1402.81	0			217.1		64.5		254.5	25.1		37.7		609.9			97.4	30.5	463.3			Not Found	Not Found	Peak Found	Not Found	Peak Found	Not Found	Peak Found	Peak Found	Not Found	Peak Found	Not Found	High	Not Found	Not Found	Peak Found	Peak Found	Peak Found
	FALSE	High	[R].FEALKEPLATR.[K]			1	1	15	P02549	P02549 [775-785]	1	1274.71	1	2.7	111.6	52.7	68.2		14.3	199.7	121	78.8	17.3	25.2	393.9	19.8	67.7	128.2	5.1	474	20		Peak Found	High	Peak Found	Peak Found	Not Found	High	High	High	Peak Found	High	Peak Found	High	Peak Found	High	Peak Found	Peak Found	High
	FALSE	High	[-].XSLILQK.[K]			1	2	6	P02549	P02549	0	830.498	1						117.7	114.7	204.7		12.9		477.8		501.9	69.1		301.1			Not Found	Not Found	Not Found	Not Found	Not Found	Peak Found	Peak Found	Peak Found	Not Found	Peak Found	Not Found	High	Not Found	High	Peak Found	Not Found	High
	FALSE	High	[K].ETGTLESQLEANKRK.[Q]			1	1	4	P02549	P02549 [2188-2202]	2	1703.89	0				36			466.2	144.8				914.1			183.2		55.8			Not Found	Not Found	Not Found	Peak Found	Not Found	Not Found	High	High	Not Found	Not Found	Not Found	Peak Found	Not Found	Not Found	Peak Found	Not Found	Peak Found
	FALSE	High	[K].ETGTLESQLEANKR.[K]			1	1	21	P02549	P02549 [2188-2201]	1	1575.8	0	23.5	161.9				8	192.3	375.9	2.3	14		515.7		191.7	29.3		282.2	3.3		Peak Found	High	Not Found	Not Found	Not Found	High	High	High	Peak Found	Peak Found	Not Found	High	Not Found	High	High	Not Found	High
	FALSE	High	[K].ETGTLESQLEANK.[R]			1	1	9	P02549	P02549 [2188-2200]	0	1419.7	0		105			5	3.2	124.2	234.1		13.5	5.5	404.2	3.9	633.4	21.8	1.1	243.1	2.2		Not Found	High	Not Found	Not Found	Peak Found	Peak Found	Peak Found	High	Not Found	Peak Found	Peak Found	High	Peak Found	High	Peak Found	Peak Found	High
	FALSE	High	[K].ALKAQLIDER.[T]			1	1	4	P02549	P02549 [1484-1493]	1	1156.67	1			7.8	1580.4	0.8		20.9	1				139			4.1	0.8	45.2			Not Found	Not Found	Peak Found	Peak Found	Peak Found	Not Found	Peak Found	Peak Found	Not Found	Not Found	Not Found	High	Not Found	Not Found	Peak Found	Peak Found	High
	FALSE	High	[K].ALGVPSSPYTWLTVEVLER.[T]			1	1	12	P02549	P02549 [2111-2129]	0	2117.13	0	102.4	138		1.4		142.9	502.5	175.3		158.2		569.3	10							Peak Found	Peak Found	Not Found	Peak Found	Not Found	High	High	High	Not Found	High	Not Found	High	Peak Found	Not Found	Not Found	Not Found	High
	FALSE	High	[K].AQLIDER.[T]			1	1	11	P02549	P02549 [1487-1493]	0	844.452	0			5.5		3.9		97.1	211.8		2	5.9	544.2		672.3	3.1	14.6	231.6	8		Not Found	High	Peak Found	Not Found	Peak Found	Not Found	High	High	Not Found	Peak Found	Peak Found	High	Not Found	High	Peak Found	High	High
	FALSE	High	[K].AIRDGLLAR.[R]			1	1	4	P02549	P02549 [555-563]	1	984.595	0			21.9				187.8	97.1	2.9			1220.3			22.6		210.3	37.2		Not Found	Not Found	Peak Found	Not Found	Not Found	Not Found	High	Peak Found	Peak Found	Not Found	Not Found	High	Not Found	Not Found	Peak Found	Not Found	High
	FALSE	High	[K].ALSNAANLQR.[F]			1	1	14	P02549	P02549 [259-268]	0	1057.57	0		3.6	8.7		11.6		110.5	239.5		9.8	2.4	375.9		721	13.9	38.9	261.3	2.9		Not Found	Peak Found	High	Not Found	Peak Found	Not Found	High	High	Not Found	High	Peak Found	High	Not Found	High	Peak Found	Peak Found	High
	FALSE	High	[K].AAVGQEEIQLR.[L]			1	1	12	P02549	P02549 [1783-1793]	0	1213.65	0							142.9	296.9	8.1	18.6		378.3		606.4	69.4		279.4			Not Found	Not Found	Not Found	Not Found	Not Found	Not Found	High	Peak Found	Peak Found	High	Not Found	High	Not Found	High	High	Not Found	High
	FALSE	High	[K].ADVVEAWIADKETSLK.[T]			1	1	3	P02549	P02549 [1937-1952]	1	1774.92	0		115.9		10.2			418.3	148.4	16.9	35.3		312.3			116.3	14.1	612.2			Not Found	Peak Found	Not Found	Peak Found	Not Found	Not Found	High	Peak Found	Peak Found	Peak Found	Not Found	High	Not Found	Not Found	Peak Found	Peak Found	Peak Found
	FALSE	High	[R].ADMEAEAPTFQALEDFSAELIDSGHHASPEIEK.[K]	1xOxidation [M3]		1	1	4	P02549	P02549 [1336-1368]	0	3601.63	0																			No Quan Values	Not Found	High	Not Found	Not Found	Not Found	Not Found	High	Not Found	Not Found	Not Found	Not Found	Not Found	Not Found	Not Found	Not Found	Not Found	High
	FALSE	High	[K].AENTGVELDDVWELQK.[K]			1	1	5	P02549	P02549 [1103-1118]	0	1845.89	0							367.1	69.7		13.8		225.6		303.3	101.3		719.2			Not Found	Not Found	Not Found	Not Found	Not Found	Not Found	High	Peak Found	Not Found	Peak Found	Not Found	High	Not Found	Peak Found	Peak Found	Not Found	High
	FALSE	High	[K].AEDLFVEFAHK.[A]			1	1	7	P02549	P02549 [2041-2051]	0	1305.65	0						62.3	337.6	161	6.3	112.8		381.9			143.2	4.8	590.2			Not Found	Not Found	Not Found	Not Found	Not Found	High	High	Peak Found	Peak Found	High	Not Found	High	Not Found	Not Found	High	Peak Found	High
	FALSE	High	[R].DDLEKAWEKR.[K]			1	1	1	P02549	P02549 [1378-1387]	2	1289.65	0			27.6		468.2		79.5	8.7		10.7	87.2	831.9			35.3	130.2	120.7			Not Found	Not Found	Peak Found	Not Found	Peak Found	Not Found	Peak Found	Peak Found	Not Found	Peak Found	Peak Found	High	Not Found	Not Found	Peak Found	Peak Found	Peak Found
	FALSE	High	[R].DDLDKAITAQEGK.[I]			1	1	10	P02549	P02549 [1437-1449]	1	1403.7	0		280.1		11.9	10.1		113.2	162.1				561		271.6	137.2	15.3	200	37.5		Not Found	High	Not Found	Peak Found	Peak Found	Not Found	High	High	Not Found	Not Found	Not Found	High	Not Found	High	Peak Found	Peak Found	High
	FALSE	High	[R].DDLEKAWEK.[R]			1	1	4	P02549	P02549 [1378-1386]	1	1133.55	0		390		68	5.9	54.8		5.3	126.4		76.1	678.5	67.4		66.6	8.7	193.6	58.7		Not Found	High	Not Found	Peak Found	Peak Found	Peak Found	Not Found	Peak Found	Peak Found	Not Found	Peak Found	High	Peak Found	Not Found	Peak Found	Peak Found	High
	FALSE	High	[R].DLQGVQNLLKK.[H]			1	1	5	P02549	P02549 [1744-1754]	1	1255.74	0							317.5	101.1				362.8		126.8	211		661.5	19.2		Not Found	Not Found	Not Found	Not Found	Not Found	Not Found	High	High	Not Found	Not Found	Not Found	Peak Found	Not Found	Peak Found	Peak Found	Not Found	High
	FALSE	High	[R].DLQGVQNLLK.[K]			1	1	4	P02549	P02549 [1744-1753]	0	1127.64	1		122.4	54.9	46.3		100.9	92.1	229.4		25.5	5.8	196.5		507.4	101.9		317			Not Found	High	Peak Found	Peak Found	Not Found	High	Peak Found	Peak Found	Not Found	Peak Found	Peak Found	High	Not Found	Peak Found	Peak Found	Not Found	Peak Found
	FALSE	High	[K].DLNTLAEDLLSSGTFNVDQIVK.[K]			1	1	10	P02549	P02549 [1665-1686]	0	2392.22	0	49.9						326.6	86.6			344	72.6		190.5	89.8	139.8	479.2	21		Peak Found	Not Found	Not Found	Not Found	Not Found	Not Found	High	High	Not Found	Not Found	Peak Found	High	Not Found	Peak Found	Peak Found	Peak Found	High
	FALSE	High	[R].DINKVADDLLFEGLLTPEGAQIR.[Q]			1	1	4	P02549	P02549 [1136-1158]	1	2527.34	0							381.1		26.1			318.7	12		132		930.2			Not Found	Not Found	Not Found	Not Found	Not Found	Not Found	High	Not Found	Peak Found	Not Found	Not Found	High	Peak Found	Not Found	Peak Found	Not Found	High
	FALSE	High	[K].DHEDFLASLAR.[A]			1	1	5	P02549	P02549 [2084-2094]	0	1273.62	0	113.3	180.9		13	11.3	6.6	130.5	142	65.8	78.6	64.9	384.3	23.9	27.8	113	118.1	273.2	52.9		Peak Found	High	Not Found	Peak Found	Peak Found	Peak Found	Peak Found	High	Peak Found	Peak Found	Peak Found	High	Peak Found	Peak Found	Peak Found	Peak Found	Peak Found
	FALSE	High	[K].DKAAVGQEEIQLR.[L]			1	1	9	P02549	P02549 [1781-1793]	1	1456.78	0							202.2	328.2				556.5	21.4	227.2	103.2		361.3			Not Found	Not Found	Not Found	Not Found	Not Found	Not Found	High	High	Not Found	Not Found	Not Found	High	Peak Found	Peak Found	Peak Found	Not Found	High
	FALSE	High	[R].DLASAGNLLKK.[H]			1	1	1	P02549	P02549 [1638-1648]	1	1129.66	0				2.8		1.6	223	102.1		2.1		436.5	1.1	219	176.9	5.2	624.6	4.9		Not Found	Not Found	Not Found	Peak Found	Not Found	Peak Found	Peak Found	Peak Found	Not Found	Peak Found	Not Found	High	Peak Found	Peak Found	Peak Found	Peak Found	Peak Found
	FALSE	High	[R].DLASAGNLLK.[K]			1	1	9	P02549	P02549 [1638-1647]	0	1001.56	0	141.8			5.6		13.3	142.7	149.1	15.5	20.3		285.6	3.1	548	117.6	22.1	315.5	19.9		Peak Found	Not Found	Not Found	Peak Found	Not Found	Peak Found	High	High	Peak Found	Peak Found	Not Found	High	Peak Found	High	Peak Found	Peak Found	High
	FALSE	High	[K].ASALNNWCEK.[M]	1xCarbamidomethyl [C8]		1	1	3	P02549	P02549 [2052-2061]	0	1192.54	1	171.8	42.3	19.7	7.9		11.1	3	637.1		191.2	19.5	205.4		419.1	12.7	45.3	13.8			Peak Found	Peak Found	Peak Found	Peak Found	Not Found	Peak Found	Peak Found	High	Not Found	Peak Found	Peak Found	High	Not Found	Peak Found	Peak Found	Peak Found	Peak Found
	FALSE	High	[R].DADDLGKWIMEK.[V]			1	1	3	P02549	P02549 [61-72]	1	1420.68	0	1641.7						21.5					65.5			8.5		62.9			Peak Found	Not Found	Not Found	Not Found	Not Found	Not Found	High	Not Found	Not Found	Not Found	Not Found	High	Not Found	Not Found	Peak Found	Not Found	High
	FALSE	High	[K].CQALSAADPGSDLFSVQALQR.[R]	1xCarbamidomethyl [C1]		1	1	2	P02549	P02549 [1203-1223]	0	2234.09	0								963.2									836.8			Not Found	Not Found	Not Found	Not Found	Not Found	Not Found	Not Found	High	Not Found	Not Found	Not Found	Not Found	Not Found	Not Found	Not Found	Not Found	Peak Found
	FALSE	High	[R].AYFLDGSLLK.[E]			1	1	5	P02549	P02549 [2178-2187]	0	1126.61	0			27	25.5		40.1	220.5	204.4	26.4	35.4		465.8	15.8	119.1	136.6		483.3			Not Found	Not Found	Peak Found	Peak Found	Not Found	High	Peak Found	Peak Found	Peak Found	Peak Found	Not Found	High	Peak Found	High	Peak Found	Not Found	High
	FALSE	High	[R].LAHDEFPMLPQR.[R]			1	1	3	P02549	P02549 [1034-1045]	0	1453.73	0	18.1					2.1	229.4	47.2		91.8		600.5		16.6	83.4		701.4	9.5		Peak Found	Not Found	Not Found	Not Found	Not Found	Peak Found	Peak Found	Peak Found	Not Found	Peak Found	Not Found	High	Not Found	Peak Found	Peak Found	Not Found	High
	FALSE	High	[R].LAQFVEHWEK.[L]			1	1	2	P02549	P02549 [1794-1803]	0	1286.65	0							218.7	142.5		43.7		779.1			124.8		491.2			Not Found	Not Found	Not Found	Not Found	Not Found	High	Peak Found	Peak Found	Not Found	Peak Found	Not Found	High	Not Found	Not Found	Peak Found	Not Found	Peak Found
	FALSE	High	[K].IEALNEKTPSLAK.[A]			1	1	9	P02549	P02549 [1903-1915]	1	1413.79	0		9.8					247.5	116.1		3.2		584.3		191.6	112.8		531.3	3.4		Not Found	Peak Found	Not Found	Not Found	Not Found	Not Found	High	High	Not Found	Peak Found	Not Found	High	Not Found	High	Peak Found	Not Found	High
	FALSE	High	[R].LEGELVAHEPAIQNVLDMAEK.[L]			1	1	2	P02549	P02549 [1758-1778]	0	2306.17	0							714.7										1085.3			Not Found	Not Found	Not Found	Not Found	Not Found	Not Found	High	Not Found	Not Found	Not Found	Not Found	Not Found	Not Found	Not Found	Not Found	Not Found	High
	FALSE	High	[K].LEDSYHLQVFKR.[D]			1	1	2	P02549	P02549 [49-60]	1	1534.8	0		13.8	29.8	124.3			22.7	3.7	15	3.9		1071.2	50.8		129.4		164	171.5		Not Found	Peak Found	Peak Found	Peak Found	Not Found	Not Found	Peak Found	Peak Found	Peak Found	Peak Found	Not Found	High	Peak Found	Not Found	Peak Found	Not Found	Peak Found
	FALSE	High	[K].LEDSYHLQVFK.[R]			1	1	2	P02549	P02549 [49-59]	0	1378.7	0						76	114.6		194.6	352.3				174.7	590.9			296.9		Not Found	Not Found	Not Found	Not Found	Not Found	High	Peak Found	Not Found	Peak Found	Peak Found	Not Found	Not Found	Not Found	Peak Found	Peak Found	Not Found	Not Found
	FALSE	High	[K].KLADDEDYKDIQNLK.[S]			1	1	2	P02549	P02549 [603-617]	2	1807.91	0		1224.5	22.6		5.8		83.8	46.2		0.4	3.4	246.8	7.9			5	153.7			Not Found	Peak Found	Peak Found	Not Found	Peak Found	Not Found	Peak Found	Peak Found	Not Found	Peak Found	Peak Found	High	Peak Found	Not Found	Not Found	Peak Found	Peak Found
	FALSE	High	[R].KGYVSLEDYTAFLIDKESENIK.[S]			1	1	1	P02549	P02549 [2331-2352]	2	2562.3	0				11.4			218.4		34.7	764.5		589.1	61				121			Not Found	Not Found	Not Found	Peak Found	Not Found	Not Found	Peak Found	Not Found	Peak Found	High	Not Found	Peak Found	Peak Found	Not Found	Not Found	Not Found	Peak Found
	FALSE	High	[R].KHGLLESAVAAR.[Q]			1	1	6	P02549	P02549 [728-739]	1	1251.72	0						86.5	174.4	31.3		42		872.9	3.8		82.7	15.8	487.3	3.3		Not Found	Not Found	Not Found	Not Found	Not Found	High	High	Peak Found	Not Found	High	Not Found	High	Peak Found	Not Found	High	Peak Found	High
	FALSE	High	[K].KLLDLLHLQLICR.[D]	1xCarbamidomethyl [C12]		1	1	1	P02549	P02549 [788-800]	1	1634.98	0						1800														Not Found	Not Found	Not Found	Not Found	Not Found	High	Not Found	Not Found	Not Found	Not Found	Not Found	Not Found	Not Found	Not Found	Not Found	Not Found	Not Found
	FALSE	High	[K].LADDEDYKDIQNLK.[S]			1	1	16	P02549	P02549 [604-617]	1	1679.81	0		296.5		19.1	9.9	22	141.2	252	11.5	28.9	11.7	468.1	12.1	155.2	66.7	1	295.2	8.9		Not Found	High	Not Found	Peak Found	Peak Found	High	High	High	Peak Found	Peak Found	Peak Found	High	Peak Found	Peak Found	Peak Found	Peak Found	High
	FALSE	High	[K].LLDLLHLQLICR.[D]	1xCarbamidomethyl [C11]		1	1	4	P02549	P02549 [789-800]	0	1506.88	0						849.9			36.8	657.5			71.2		28.8	155.9				Not Found	Not Found	Not Found	Not Found	Not Found	High	Not Found	Not Found	Peak Found	High	Not Found	Not Found	Peak Found	Not Found	Peak Found	Peak Found	Not Found
	FALSE	High	[K].LKEAYALFQFFQDLDDEESWIEEK.[L]			1	1	2	P02549	P02549 [1709-1732]	1	2993.41	0										1800										Not Found	Not Found	Not Found	Not Found	Not Found	Not Found	Not Found	Not Found	Not Found	High	Not Found	Not Found	Not Found	Not Found	Not Found	Not Found	Not Found
	FALSE	High	[K].LKDKAAVGQEEIQLR.[L]			1	1	3	P02549	P02549 [1779-1793]	2	1697.95	0				59.3		15.6	343.2		28.7			614					723.7	15.5		Not Found	Not Found	Not Found	Peak Found	Not Found	Peak Found	High	Not Found	Peak Found	Not Found	Not Found	High	Not Found	Not Found	Not Found	Not Found	High
	FALSE	High	[R].LLKESLLLQK.[L]			1	1	3	P02549	P02549 [577-586]	1	1184.76	0	10.2						125.5	24				1125.1			80.6		434.6			Peak Found	Not Found	Not Found	Not Found	Not Found	Not Found	Peak Found	Peak Found	Not Found	Not Found	Not Found	High	Not Found	Not Found	Peak Found	Not Found	High
	FALSE	High	[K].LIGDDHYDSENIK.[A]			1	1	13	P02549	P02549 [542-554]	0	1518.71	0		87.5				4.1	182.9	341.5		3.1		565.5		196.9	69.7	21.4	326.3	1.1		Not Found	High	Not Found	Not Found	Not Found	High	High	High	Not Found	Peak Found	Not Found	High	Not Found	Peak Found	High	Peak Found	Peak Found
	FALSE	High	[K].LGDYANLK.[Q]			1	1	4	P02549	P02549 [1496-1503]	0	893.473	0				65.6					196.8	90.4			345.1	190.4	388.1		141.2	382.4		Not Found	Not Found	Peak Found	Peak Found	Peak Found	Not Found	Peak Found	High	Peak Found	Peak Found	Not Found	Peak Found	Peak Found	Peak Found	High	Not Found	Peak Found
	FALSE	High	[K].GLAEVQNR.[L]			1	1	2	P02549	P02549 [718-725]	0	886.474	0																			No Quan Values	Not Found	Not Found	Not Found	Not Found	Not Found	Peak Found	Peak Found	Not Found	Not Found	Not Found	Peak Found	Not Found	Not Found	Not Found	High	Not Found	Peak Found
	FALSE	High	[R].FQSADETGQDLVNANHEASDEVR.[E]			1	1	7	P02549	P02549 [426-448]	0	2532.12	0	20.8						266.3	503.3		54.1		163.7		261.8			530			Peak Found	Not Found	Not Found	Not Found	Not Found	Not Found	Peak Found	High	Not Found	High	Not Found	High	Not Found	High	Not Found	Not Found	High
	FALSE	High	[R].FSSDFDELSGWMNEK.[T]			1	1	9	P02549	P02549 [375-389]	0	1791.75	0	9.4	225.9			7.6	6.2	333.4	108.4		5.8	15	129.9		60.2	43.8		854.3			Peak Found	High	Not Found	Not Found	Peak Found	High	High	High	Not Found	Peak Found	Peak Found	Peak Found	Not Found	Peak Found	High	Not Found	High
	FALSE	High	[R].FSSDFDELSGWMNEK.[T]	1xOxidation [M12]		1	1	6	P02549	P02549 [375-389]	0	1807.75	0							442.1	214				301.2		111.4	52.3		679.1			Not Found	Not Found	Not Found	Not Found	Not Found	Not Found	High	Peak Found	Not Found	Not Found	Not Found	High	Not Found	Peak Found	High	Not Found	High
	FALSE	High	[R].FLNVQELAAAHHEK.[L]			1	1	6	P02549	P02549 [1695-1708]	0	1606.83	0			11.9		7	1.5	238.3	63.2	15.2	44.6	69.4	798.2			90.1		456.5	4.1		Not Found	Not Found	Peak Found	Not Found	Peak Found	Peak Found	High	High	Peak Found	High	Peak Found	High	Not Found	Not Found	Peak Found	Not Found	High
	FALSE	High	[R].GDCGDTLAATQSLLMK.[H]	1xCarbamidomethyl [C3]		1	1	2	P02549	P02549 [1845-1860]	0	1680.79	0		78.6		26.6			72.4	955.2		39	236.1	233					159			Not Found	Peak Found	Not Found	Peak Found	Not Found	Not Found	Peak Found	High	Not Found	Peak Found	Peak Found	Peak Found	Not Found	Not Found	Not Found	Not Found	Peak Found
	FALSE	High	[R].FTMGHSAHEETKAHIEELR.[H]	1xOxidation [M3]		1	1	2	P02549	P02549 [119-137]	1	2239.06	0		7.3				16.5				0.7		852.4			303.4	562.9	41.1	15.6		Not Found	Peak Found	Not Found	Not Found	Not Found	Peak Found	Not Found	Not Found	Not Found	Peak Found	Not Found	High	Not Found	Not Found	Peak Found	Peak Found	Peak Found
	FALSE	High	[K].FYLFLSK.[A]			1	1	5	P02549	P02549 [1291-1297]	0	917.513	0	34.6	474.3	173.4	5.5	427.4	17.7	90	42.7	4.5	29.1	191.5	81.6		10.3	12	88.6	109.3	7.3		Peak Found	Peak Found	Peak Found	Peak Found	Peak Found	High	High	Peak Found	Peak Found	Peak Found	Peak Found	High	Not Found	Peak Found	Peak Found	Peak Found	High
	FALSE	High	[K].HLSDIIEER.[E]			1	1	10	P02549	P02549 [2133-2141]	0	1111.57	0		258.1	58.8		226	116.1	77.4	262.5		101.9		482.4		14	14.6	30.3	145.7	12.1		Not Found	High	Peak Found	Not Found	Peak Found	High	High	High	Not Found	High	Not Found	High	Not Found	Peak Found	Peak Found	Peak Found	Peak Found
	FALSE	High	[R].HLWDLLLELTLEK.[G]			1	1	2	P02549	P02549 [138-150]	0	1622.92	0										357.2	1413.7		29.1							Not Found	Not Found	Not Found	Not Found	Not Found	Not Found	Not Found	Not Found	Not Found	High	Peak Found	Not Found	Peak Found	Not Found	Not Found	Not Found	Not Found
	FALSE	High	[K].HQTFAHEVDGR.[S]			1	1	8	P02549	P02549 [1541-1551]	0	1296.61	0				0.8	2.8	54.5	1330.9	0.2	69.6			300.4	32.8		1.6		4.8	1.6		Not Found	Not Found	Not Found	Peak Found	Peak Found	High	High	Peak Found	Peak Found	Not Found	Not Found	High	Peak Found	Not Found	Peak Found	Not Found	High
	FALSE	High	[K].HQSLEAEVQTK.[S]			1	1	10	P02549	P02549 [94-104]	0	1269.64	0		111.5					127.3	146.2				931.5		223.2			260.2			Not Found	Peak Found	Not Found	Not Found	Not Found	Not Found	High	High	Not Found	Not Found	Not Found	High	Not Found	High	Not Found	Not Found	High
	FALSE	High	[K].HGLLESAVAAR.[Q]			1	1	9	P02549	P02549 [729-739]	0	1123.62	1	2.7	168.1	10.5	39.4		19.4	243.1	84.9	14.8	21.5	15.9	553.7	17.9		96.2	2.8	459.3	49.7		Peak Found	High	Peak Found	Peak Found	Not Found	High	High	High	Peak Found	High	Peak Found	Peak Found	Peak Found	Not Found	Peak Found	Peak Found	High
	FALSE	High	[K].HEIDSYDDRFQSADETGQDLVNANHEASDEVR.[E]			1	1	1	P02549	P02549 [417-448]	1	3662.59	0							163.2	9.3		20	1133.3			40.1			434.1			Not Found	Not Found	Not Found	Not Found	Not Found	Not Found	Peak Found	Peak Found	Not Found	Peak Found	Peak Found	Not Found	Not Found	Peak Found	Not Found	Not Found	High
	FALSE	High	[K].HEIDSYDDR.[F]			1	1	2	P02549	P02549 [417-425]	0	1149.48	0	231.4					26.9	170.9	254		5.8		64				39.8	986.3	21		Peak Found	Not Found	Not Found	Not Found	Not Found	Peak Found	High	Peak Found	Not Found	Peak Found	Not Found	Peak Found	Not Found	Not Found	Not Found	Peak Found	Peak Found
	FALSE	High	[K].HFDENLTGR.[L]			1	1	13	P02549	P02549 [2282-2290]	0	1088.51	0		65		25.8		2.2	99.5	129.5		12.7	8.8	784.3	114	130.5	56.9	7	363.8			Not Found	High	Not Found	Peak Found	Not Found	Peak Found	High	High	Not Found	High	Peak Found	High	Peak Found	High	High	Peak Found	High
	FALSE	High	[K].KFEDFQVELVAK.[E]			1	1	5	P02549	P02549 [199-210]	1	1452.77	0						162.7	378.9	124	68.6	232.9	19.5	158.2	20.1		115.2		495.6	24.3		Not Found	Not Found	Not Found	Not Found	Not Found	High	High	High	Peak Found	Peak Found	Peak Found	Peak Found	Peak Found	Not Found	Peak Found	Not Found	Peak Found
	FALSE	High	[K].KFDEFQKDLNTNEPR.[L]			1	1	1	P02549	P02549 [1119-1133]	2	1880.91	0						112.9	419.1		76.3			1041.2			120			30.6		Not Found	Not Found	Not Found	Not Found	Not Found	Peak Found	Peak Found	Not Found	Peak Found	Not Found	Not Found	Peak Found	Not Found	Not Found	High	Not Found	Not Found
	FALSE	High	[K].KGDVLTLLSSINKDWWK.[V]			1	1	3	P02549	P02549 [1000-1016]	2	2003.1	0				11.5		928.7				391.9			248.9		8.2	80.9	128.6	1.4		Not Found	Not Found	Not Found	Peak Found	Not Found	High	Not Found	Not Found	Not Found	Peak Found	Not Found	Not Found	High	Not Found	Peak Found	Peak Found	Peak Found
	FALSE	High	[K].KGDVLTLLSSINK.[D]			1	1	6	P02549	P02549 [1000-1012]	1	1387.82	0			257			297.4	333.1	31.4	132.1	224.5		78.5			94.4		334.1	17.6		Not Found	Not Found	Peak Found	Not Found	Not Found	High	High	Peak Found	High	Peak Found	Not Found	Peak Found	Not Found	Not Found	Peak Found	Not Found	Peak Found
	FALSE	High	[K].KCQALSAADPGSDLFSVQALQR.[R]	1xCarbamidomethyl [C2]		1	1	3	P02549	P02549 [1202-1223]	1	2362.18	0							336.2	219.1				525.5			88.3		631			Not Found	Not Found	Not Found	Not Found	Not Found	Not Found	High	High	Not Found	Not Found	Not Found	High	Not Found	Not Found	Peak Found	Not Found	Peak Found
	FALSE	High	[K].KAENTGVELDDVWELQKK.[F]			1	1	2	P02549	P02549 [1102-1119]	2	2102.08	0			81.7			5.5	406.6					463.3			110.1		732.8			Not Found	Not Found	Peak Found	Not Found	Not Found	Peak Found	Peak Found	Not Found	Not Found	Not Found	Not Found	High	Not Found	Not Found	Peak Found	Not Found	High
	FALSE	High	[K].KAENTGVELDDVWELQK.[K]			1	1	4	P02549	P02549 [1102-1118]	1	1973.98	0		139.2		3.1			417.7	58	8.4	17.1		263.2		76.5	64.7		732.1	19.9		Not Found	High	Not Found	Peak Found	Not Found	Not Found	High	High	Peak Found	Peak Found	Not Found	High	Not Found	Peak Found	Peak Found	Not Found	Peak Found
	FALSE	High	[K].HEDFEEAFTAQEEK.[I]			1	1	8	P02549	P02549 [518-531]	0	1709.73	0		121.5					393.3	329.3		100.1					87.2		768.6			Not Found	Peak Found	Not Found	Not Found	Not Found	Not Found	High	High	Not Found	Peak Found	Not Found	Not Found	Not Found	Not Found	High	Not Found	High
	FALSE	High	[R].GNKMVEEGHFAAEDVASR.[V]	1xOxidation [M4]		1	1	1	P02549	P02549 [856-873]	1	1962.9	0							330.4	16.2				624.3	37.2		11.8		780.1			Not Found	Not Found	Not Found	Not Found	Not Found	Not Found	Peak Found	Peak Found	Not Found	Not Found	Not Found	Peak Found	Peak Found	Not Found	Peak Found	Not Found	High
	FALSE	High	[K].GVSEETLKEFSTIYK.[H]			1	1	6	P02549	P02549 [2267-2281]	1	1730.88	0						10.8	291.4	75.6		4.8		616.4	1.2	34.4	71.4		681.2	12.6		Not Found	Not Found	Not Found	Not Found	Not Found	High	High	Peak Found	Not Found	Peak Found	Not Found	High	Peak Found	Peak Found	Peak Found	Not Found	Peak Found
	FALSE	High	[K].HEALENDFAVHETR.[V]			1	1	9	P02549	P02549 [1861-1874]	0	1667.78	0		308.7					219.7	202.4	25.3	64.3		585.9			48		345.8			Not Found	High	Not Found	Not Found	Not Found	High	High	High	Peak Found	High	Not Found	Peak Found	Not Found	Not Found	Peak Found	Not Found	Peak Found
	FALSE	High	[K].GYVSLEDYTAFLIDKESENIK.[S]			1	1	1	P02549	P02549 [2332-2352]	1	2434.2	0							563.8	95.2		258.4		389.5	118.5	26.7	7.7		340.3			Not Found	Not Found	Not Found	Not Found	Not Found	Not Found	High	Peak Found	Not Found	Peak Found	Not Found	Peak Found	Peak Found	Peak Found	Peak Found	Not Found	Peak Found
	FALSE	High	[K].GTQLHEANQQLQFENNAEDLQR.[W]			1	1	13	P02549	P02549 [680-701]	0	2583.22	0		131.5				0.5	359.8	204.2		16.5		343.5		21.6	49.1	5.8	667.5			Not Found	High	Not Found	Not Found	Not Found	Peak Found	High	Peak Found	Not Found	Peak Found	Not Found	High	Not Found	High	High	Peak Found	High
FALSE	High	Master Protein	P35579	Myosin-9 OS=Homo sapiens OX=9606 GN=MYH9 PE=1 SV=4	0	800.731	60	131	1379	114	1	1960	226.4	5.6	36898	2226.16	130	109	16	129	157	101.5	73.3	223.8	23.4	109.6	114.6	40.8	44.1	103.7	81.7	60.4	150.9	77.6	68.8	195.8	44.1	3.02615e+10	3.68285e+10	2.37986e+10	1.71901e+10	5.24821e+10	5.49779e+09	2.57086e+10	2.6888e+10	9.56382e+09	1.03323e+10	2.43336e+10	1.91543e+10
	Checked	Confidence	Annotated Sequence	Modifications	Modifications in Master Proteins	# Protein Groups	# Proteins	# PSMs	Master Protein Accessions	Positions in Master Proteins	# Missed Cleavages	Theo. MH+ [Da]	# Razor Quan Results	Abundances (Scaled): F1: Sample	Abundances (Scaled): F2: Sample	Abundances (Scaled): F3: Sample	Abundances (Scaled): F4: Sample	Abundances (Scaled): F5: Sample	Abundances (Scaled): F6: Sample	Abundances (Scaled): F7: Sample	Abundances (Scaled): F8: Sample	Abundances (Scaled): F9: Sample	Abundances (Scaled): F10: Sample	Abundances (Scaled): F11: Sample	Abundances (Scaled): F12: Sample	Abundances (Scaled): F13: Sample	Abundances (Scaled): F14: Sample	Abundances (Scaled): F15: Sample	Abundances (Scaled): F16: Sample	Abundances (Scaled): F17: Sample	Abundances (Scaled): F18: Sample	Quan Info	Found in Sample: [S1] F1: Sample	Found in Sample: [S2] F2: Sample	Found in Sample: [S3] F3: Sample	Found in Sample: [S4] F4: Sample	Found in Sample: [S5] F5: Sample	Found in Sample: [S6] F6: Sample	Found in Sample: [S7] F7: Sample	Found in Sample: [S8] F8: Sample	Found in Sample: [S9] F9: Sample	Found in Sample: [S10] F10: Sample	Found in Sample: [S11] F11: Sample	Found in Sample: [S12] F12: Sample	Found in Sample: [S13] F13: Sample	Found in Sample: [S14] F14: Sample	Found in Sample: [S15] F15: Sample	Found in Sample: [S16] F16: Sample	Found in Sample: [S17] F17: Sample
	FALSE	High	[R].QAQQERDELADEIANSSGK.[G]			1	1	18	P35579	P35579 [1698-1716]	1	2088.98	0	23.5	264.2		72.9	83.8	48.1	85.8	176.5	113	36.4	155.4	181.8	92.6	145.7	100.3	57.7	126.5	35.8		Peak Found	High	Not Found	High	Peak Found	High	High	High	Peak Found	High	Peak Found	High	High	Peak Found	High	Peak Found	High
	FALSE	High	[R].NTDQASMPDNTAAQK.[V]	1xOxidation [M7]		2	2	2	P35749; P35579	P35749 [366-380]; P35579 [359-373]	0	1607.7	0																			No Quan Values	Not Found	Not Found	Not Found	Not Found	Not Found	Not Found	Not Found	Not Found	Not Found	Not Found	Not Found	Not Found	Not Found	Not Found	High	Not Found	Not Found
	FALSE	High	[K].QIATLHAQVADMK.[K]			1	1	2	P35579	P35579 [1358-1370]	0	1425.75	0			430.1	394.1	115.2		117.8		114.9	25		67.1	132.5		152.7	64.3	186			Not Found	Not Found	Peak Found	High	Peak Found	Not Found	Peak Found	Not Found	Peak Found	Peak Found	Not Found	Peak Found	High	Not Found	Peak Found	Peak Found	Peak Found
	FALSE	High	[RK].QLLQANPILEAFGNAK.[T]			3	5	21	P35749; P35579; Q7Z406	P35749 [217-232]; P35579 [210-225]; Q7Z406 [237-252]	0	1726.95	0		366.6	88.3	29.1	149.6	40.6	129.3	121.8	33.6	21	203	133.6	95.7	115.6	70.2	19.3	177.1	5.5	Shared	Not Found	High	High	Peak Found	High	High	High	High	High	Peak Found	High	Peak Found	High	High	Peak Found	Peak Found	High
	FALSE	High	[R].QLEEAEEEAQR.[A]			1	1	7	P35579	P35579 [1878-1888]	0	1331.61	0	13.6	403.3	96.4	167.6	77.2		67.2	131.8	55.1	27.6	137.9	32.6	49.9	107.1	312.6		120			Peak Found	High	Peak Found	Peak Found	Peak Found	Not Found	Peak Found	High	Peak Found	High	High	Peak Found	Peak Found	Peak Found	Peak Found	Not Found	Peak Found
	FALSE	High	[R].QEEEMMAKEEELVK.[V]			1	1	2	P35579	P35579 [843-856]	1	1722.79	0				869.2				114.2			816.6									Not Found	Not Found	Not Found	High	Not Found	Not Found	Not Found	Peak Found	Not Found	Not Found	Peak Found	Not Found	Not Found	Not Found	Not Found	Not Found	Not Found
	FALSE	High	[K].NFINNPLAQADWAAK.[K]			1	3	9	P35579	P35579 [15-29]	0	1672.84	0	173.5	250.9	11.3	136.3	104.7	110.5	64.9	119.2	271.4	36.9	6.7	120.6	145.1	80.6	71.5		56	39.8		Peak Found	High	Peak Found	Peak Found	Peak Found	High	Peak Found	Peak Found	High	Peak Found	Peak Found	High	High	Peak Found	Peak Found	Not Found	Peak Found
	FALSE	High	[K].NKHEAMITDLEER.[L]	1xOxidation [M6]		1	1	4	P35579	P35579 [1023-1035]	1	1601.76	0	21.7			38.3		127.2	179.5	124.2	35	397.5	129	211.9	31.6	186.3	125	14.9	178			Peak Found	Not Found	Not Found	Peak Found	Not Found	Peak Found	High	Peak Found	Peak Found	Peak Found	Peak Found	High	Peak Found	Peak Found	High	Peak Found	High
	FALSE	High	[K].NKHEAMITDLEER.[L]			1	1	1	P35579	P35579 [1023-1035]	1	1585.76	0		1118.7						240.5				157.3			126.9			156.6		Not Found	High	Not Found	Not Found	Not Found	Not Found	Not Found	Peak Found	Not Found	Not Found	Not Found	Peak Found	Not Found	Not Found	Peak Found	Not Found	Not Found
	FALSE	High	[R].NAEQYKDQADKASTR.[L]			1	1	14	P35579	P35579 [1857-1871]	2	1724.82	0	0.9	64.8				17.1	173.2	257.2		17.1		687.4	17.5	63.8			468.1	32.8		Peak Found	High	Not Found	High	Not Found	High	Peak Found	Peak Found	Not Found	High	Not Found	Peak Found	High	High	Not Found	Not Found	High
	FALSE	High	[K].NMDPLNDNIATLLHQSSDKFVSELWK.[D]			1	1	5	P35579	P35579 [588-613]	1	3015.49	0				863.2					7.3	85.6			843.9							Not Found	Not Found	Not Found	High	Not Found	Not Found	Not Found	Not Found	Peak Found	Peak Found	Not Found	Not Found	High	Not Found	Not Found	Not Found	Not Found
	FALSE	High	[K].NMDPLNDNIATLLHQSSDK.[F]			1	1	6	P35579	P35579 [588-606]	0	2126.02	0				742.7		189.9			444.3	66.7		77.3	214					65.1		Not Found	Not Found	Not Found	High	Not Found	High	Not Found	Not Found	Peak Found	Peak Found	Not Found	Peak Found	High	Not Found	Not Found	Not Found	Not Found
	FALSE	High	[K].NLPIYSEEIVEMYK.[G]			1	2	8	P35579	P35579 [126-139]	0	1727.86	0			17.5	247.3		67.9	208.3	206.6	136.6	358.6		14.5	85	19.4			431.8	6.5		Not Found	Not Found	Peak Found	Peak Found	Not Found	High	Peak Found	Peak Found	High	High	Not Found	Peak Found	High	Peak Found	Not Found	Not Found	Peak Found
	FALSE	High	[K].RQLEEAEEEAQR.[A]			1	1	13	P35579	P35579 [1877-1888]	1	1487.71	0		112.7	11.7	408.9		159.9		176.5	115.4	40.7	10.2	58.9	226.6	2.5	220.8		89.8	165.4		Not Found	Peak Found	Peak Found	High	Not Found	High	Not Found	High	Peak Found	Peak Found	Peak Found	High	High	Peak Found	Peak Found	Not Found	Peak Found
	FALSE	High	[K].SGFEPASLKEEVGEEAIVELVENGKK.[V]			1	3	3	P35579	P35579 [39-64]	2	2788.43	0				160.8	37	166.4	18.2	137		233		275.6	747	15.4				9.5		Not Found	Not Found	Not Found	Peak Found	Peak Found	High	Peak Found	Peak Found	Not Found	High	Not Found	Peak Found	Peak Found	Peak Found	Not Found	Not Found	Not Found
	FALSE	High	[K].QTLENERGELANEVK.[V]			1	1	5	P35579	P35579 [1220-1234]	1	1729.87	0			367.7	33.5	7.5	45.3		153.8	38.3	83.5		47.8	162.1		467.3		393			Not Found	Not Found	Peak Found	High	Peak Found	Peak Found	Not Found	Peak Found	Peak Found	Peak Found	Not Found	Peak Found	High	Not Found	Peak Found	Not Found	Peak Found
	FALSE	High	[R].QRYEILTPNSIPK.[G]			1	1	1	P35579	P35579 [719-731]	1	1558.86	0			351.5	313.6			73.6	217.4	83.2	49.7		160.7	313.4	121.1	77		38.7			Not Found	Not Found	Peak Found	High	Not Found	Not Found	Peak Found	Peak Found	Peak Found	Peak Found	Not Found	Peak Found	Peak Found	Peak Found	Peak Found	Not Found	Peak Found
	FALSE	High	[R].RKLEGDSTDLSDQIAELQAQIAELK.[M]			1	1	7	P35579	P35579 [1051-1075]	2	2771.44	0		4.3	11.7	171.6		34.1	42.5	58.7	95.2	202.8	512.9	91.9	488.8	24	22.7	8.9	29.9			Not Found	Peak Found	Peak Found	High	Not Found	High	Peak Found	Peak Found	Peak Found	Peak Found	Peak Found	Peak Found	High	Peak Found	Peak Found	Peak Found	Peak Found
	FALSE	High	[R].RGDLPFVVPR.[R]			1	1	18	P35579	P35579 [1923-1932]	1	1155.66	0	119.5	252.3	399.5	73.8	368.3	49.4	2.7	50.3	70.1	45.2	28.8	59.6	123.3	42.7	37.8	11.4	33.6	31.6		Peak Found	High	High	High	High	High	Peak Found	Peak Found	High	Peak Found	Peak Found	Peak Found	High	High	Peak Found	Peak Found	High
	FALSE	High	[K].REQEVNILK.[K]			1	1	3	P35579	P35579 [1165-1173]	1	1128.64	0		698.7						211.1							304.3			585.9		Not Found	High	Not Found	Not Found	Not Found	Not Found	Not Found	Peak Found	Not Found	Not Found	Not Found	Not Found	Not Found	Not Found	Peak Found	Not Found	High
	FALSE	High	[K].LQLQEQLQAETELCAEAEELR.[A]	1xCarbamidomethyl [C14]		1	1	8	P35579	P35579 [883-903]	0	2501.22	0		16.3	29.2	1.5	154.6		109	26.9		7.2	626.3	64.9		562.6	16.7	127.5	57.3			Not Found	Peak Found	Peak Found	High	Peak Found	Not Found	Peak Found	Peak Found	Not Found	Peak Found	Peak Found	High	Not Found	High	High	Peak Found	Peak Found
	FALSE	High	[K].LQVELDNVTGLLSQSDSK.[S]			1	1	27	P35579	P35579 [1278-1295]	0	1946.01	0		8.7	98.3	24.4	127.2	9.7	312.4	131	40.4	1.5	207.1	121.4	65.1	150.4	122.8	8.5	320.4	50.8		Not Found	Peak Found	High	High	High	High	High	High	High	High	High	Peak Found	High	High	High	Peak Found	High
	FALSE	High	[K].LQQLFNHTMFILEQEEYQR.[E]			3	3	7	P35580; P35749; P35579	P35580 [483-501]; P35749 [483-501]; P35579 [476-494]	0	2467.21	0				176.8		464.5		107	250.6	531.1			242.2				15.2	12.6	Shared	Not Found	Not Found	Not Found	High	Not Found	High	Not Found	Peak Found	High	Peak Found	Not Found	Not Found	High	Not Found	Not Found	Not Found	Peak Found
	FALSE	High	[R].LQQELDDLLVDLDHQR.[Q]			1	1	22	P35579	P35579 [1418-1433]	0	1949.99	0		24.1	32.1	135.3	34.2	79.8	91.8	154.5	199.1	135.4	251.6	95.3	196.2	125	155.9	31.8	57.9			Not Found	Peak Found	Peak Found	High	Peak Found	High	High	High	High	High	High	Peak Found	High	High	High	High	Peak Found
	FALSE	High	[K].LQEMEGTVK.[S]			1	1	1	P35579	P35579 [1794-1802]	0	1034.52	0		248.7					108.9	328.2		40.3	19.6			172.5			434.2	447.7		Not Found	Peak Found	Not Found	Not Found	Not Found	Not Found	Peak Found	Peak Found	Not Found	Peak Found	Peak Found	Not Found	Not Found	High	Not Found	Not Found	Peak Found
	FALSE	High	[K].IRELESQISELQEDLESER.[A]			1	1	17	P35579	P35579 [1106-1124]	1	2303.14	0	24	18.4		114.3	15.9	361.2		184.6	116.8	224.9		33.4	418	39.5	118.3		130.6			Peak Found	Peak Found	Not Found	High	Peak Found	High	High	High	High	High	Not Found	High	High	Peak Found	High	Not Found	High
	FALSE	High	[R].IMGIPEEEQMGLLR.[V]			1	1	2	P35579	P35579 [328-341]	0	1615.82	0																			No Quan Values	Not Found	Not Found	Not Found	High	Not Found	Not Found	Not Found	Not Found	Not Found	Not Found	Not Found	Not Found	Not Found	Not Found	Not Found	Not Found	Not Found
	FALSE	High	[K].MEDSVGCLETAEEVKR.[K]	1xCarbamidomethyl [C7]		1	1	1	P35579	P35579 [1373-1388]	1	1852.84	0		1800																		Not Found	High	Not Found	Not Found	Not Found	Not Found	Not Found	Not Found	Not Found	Not Found	Not Found	Not Found	Not Found	Not Found	Not Found	Not Found	Not Found
	FALSE	High	[K].MEDSVGCLETAEEVK.[R]	1xCarbamidomethyl [C7]		1	1	3	P35579	P35579 [1373-1387]	0	1696.74	0				1295.3					326.9	177.8										Not Found	Not Found	Not Found	High	Not Found	Not Found	Not Found	Not Found	High	Peak Found	Not Found	Not Found	Not Found	Not Found	Not Found	Not Found	Not Found
	FALSE	High	[K].MQQNIQELEEQLEEEESAR.[Q]			1	1	12	P35579	P35579 [941-959]	0	2333.06	0		541.1		116.3			263.7	56.4	36.1	71.1			16.7		102.1		596.5			Not Found	High	Not Found	High	Not Found	Not Found	High	Peak Found	High	High	Not Found	Not Found	Peak Found	Not Found	High	Not Found	High
	FALSE	High	[K].MQQNIQELEEQLEEEESAR.[Q]	1xOxidation [M1]		1	1	8	P35579	P35579 [941-959]	0	2349.05	0		331	11.5				339.6	188.1		10.7	222.4	100.3		135.1	57.9		403.4			Not Found	Peak Found	Peak Found	Not Found	Not Found	Not Found	High	High	Not Found	Peak Found	Peak Found	Peak Found	Not Found	Peak Found	High	Not Found	High
	FALSE	High	[R].LTEMETLQSQLMAEK.[L]	1xOxidation [M]		1	1	1	P35579	P35579 [868-882]	0	1767.85	0																			No Quan Values	Not Found	High	Not Found	Not Found	Not Found	Not Found	Not Found	Not Found	Not Found	Not Found	Not Found	Not Found	Not Found	Not Found	Not Found	Not Found	Not Found
	FALSE	High	[R].LTEMETLQSQLMAEK.[L]			1	1	8	P35579	P35579 [868-882]	0	1751.86	0				518			232.3	161.6		39.1		157.4	135.6				556.1			Not Found	Not Found	Not Found	Peak Found	Not Found	Not Found	High	Peak Found	High	Peak Found	Not Found	Peak Found	High	Not Found	Not Found	Not Found	High
	FALSE	High	[K].LVWVPSDK.[S]			1	3	3	P35579	P35579 [31-38]	0	943.525	0				541.9		89.9			297				367.6		376.3			127.3		Not Found	Not Found	Not Found	High	Not Found	High	Not Found	Not Found	Peak Found	Not Found	Not Found	Not Found	Peak Found	Not Found	Peak Found	Not Found	Not Found
	FALSE	High	[K].VKPLLQVSR.[Q]			1	1	3	P35579	P35579 [834-842]	0	1039.66	1					83.9		264.1	323.4		137.9	84.4	397.6		64.3	68.3		376.1			Not Found	Not Found	Not Found	Not Found	Peak Found	Not Found	Peak Found	High	Not Found	Peak Found	Peak Found	High	Not Found	Peak Found	Peak Found	Not Found	High
	FALSE	High	[K].VKLQEMEGTVK.[S]			1	1	2	P35579	P35579 [1792-1802]	1	1261.68	0			551.8	69.8	116.1	19.2		630.4				78.4				295.5		38.7		Not Found	Not Found	Peak Found	Peak Found	Peak Found	Peak Found	Not Found	High	Not Found	Not Found	Not Found	Peak Found	Not Found	Not Found	Not Found	Peak Found	Not Found
	FALSE	High	[K].VIQYLAYVASSHK.[S]			1	2	10	P35579	P35579 [187-199]	0	1478.8	1	11.7	3.1		414.9		190.7	79.9	113.3	107.3	83.4	18.6	180.5	306.8	24.1	67.6		163.6	34.6		Peak Found	Peak Found	Not Found	High	Not Found	High	Peak Found	High	High	Peak Found	Peak Found	High	High	Peak Found	Peak Found	Not Found	Peak Found
	FALSE	High	[R].VISGVLQLGNIVFK.[K]			1	1	29	P35579	P35579 [342-355]	0	1486.9	0	25.7	473	79.5	84.5	90.3	161.9	67.2	97.1	68.1	22.5	78.3	99.8	152.1	157.9	73.7		62.9	5.6		High	High	Peak Found	High	High	High	High	High	High	Peak Found	High	High	High	High	High	Not Found	High
	FALSE	High	[R].VISGVLQLGNIVFKK.[E]			1	1	8	P35579	P35579 [342-356]	1	1614.99	0			21.7	177.1	44	163.2	90.7	156.2	3.6	57.3	15.3	88.9	650.4	40.8	176.1	22.4	84.7	7.7		Not Found	Not Found	Peak Found	High	Peak Found	High	High	Peak Found	Peak Found	Peak Found	Peak Found	Peak Found	High	Peak Found	Peak Found	Peak Found	Peak Found
	FALSE	High	[K].VAAYDKLEK.[T]			1	1	8	P35579	P35579 [1405-1413]	1	1036.57	0		334.1	41.3		79		263.2	258.1				216.7		47.4		28.8	531.4			Not Found	High	Peak Found	Not Found	Peak Found	Not Found	High	Peak Found	Not Found	Not Found	Not Found	High	Not Found	Peak Found	Not Found	Peak Found	High
	FALSE	High	[K].VEAQLQELQVK.[F]			1	1	11	P35579	P35579 [1250-1260]	0	1284.72	0	91.8	460.4		163.9	5.1	53.7	6.3	210.2	84.3	44.5			103.3		322.4		30.5	223.5		Peak Found	High	Not Found	Peak Found	Peak Found	High	Peak Found	High	High	High	Not Found	Not Found	Peak Found	Not Found	High	Not Found	Peak Found
	FALSE	High	[R].VEEEEERCQHLQAEK.[K]	1xCarbamidomethyl [C8]		1	1	1	P35579	P35579 [924-938]	1	1913.87	0	111.2	752.4	345.5		121.6			196.7		17				25.2	20.8	49.4	151.7	8.5		Peak Found	High	Peak Found	Not Found	Peak Found	Not Found	Not Found	Peak Found	Not Found	Peak Found	Not Found	Not Found	Not Found	Peak Found	Peak Found	Peak Found	Peak Found
	FALSE	High	[K].VEDMAELTCLNEASVLHNLK.[ED]	1xCarbamidomethyl [C9]		2	5	7	P35580; P35579	P35580 [87-106]; P35579 [83-102]	0	2286.11	0	280.5	158.1		344		111.9	3.9	25.6	460.5	63.2		5.2	218.4	106.1	7.7			14.9	Shared	Peak Found	Peak Found	Not Found	High	Not Found	High	Peak Found	Peak Found	High	Peak Found	Not Found	Peak Found	High	Peak Found	Peak Found	Not Found	Not Found
	FALSE	High	[K].YKASITALEAK.[I]			1	1	3	P35579	P35579 [1805-1815]	1	1194.67	0				20.1			305.3					659.3	67.9	28.7	140.5		563.1	15.1		Not Found	Not Found	Not Found	Peak Found	Not Found	Not Found	High	Not Found	Not Found	Not Found	Not Found	High	Peak Found	Peak Found	Peak Found	Not Found	Peak Found
	FALSE	High	[R].YEILTPNSIPK.[G]			1	1	3	P35579	P35579 [721-731]	0	1274.7	0				295.4	161.2			188.5	204.6	56.8		70.1	252.4	177.4	276.2		97.1	20.3		Not Found	Not Found	Not Found	Peak Found	Peak Found	Not Found	Not Found	Peak Found	High	Peak Found	Not Found	Peak Found	High	Peak Found	Peak Found	Not Found	Peak Found
	FALSE	High	[K].YLYVDKNFINNPLAQADWAAK.[K]			1	3	1	P35579	P35579 [9-29]	1	2454.25	0				321.3						110.8			1367.9							Not Found	Not Found	Not Found	High	Not Found	Not Found	Not Found	Not Found	Not Found	Peak Found	Not Found	Not Found	Peak Found	Not Found	Not Found	Not Found	Not Found
	FALSE	High	[R].VRTELADKVTK.[L]			1	1	2	P35579	P35579 [1267-1277]	2	1259.73	0				228.8									1421.6		149.6					Not Found	Not Found	Not Found	Peak Found	Not Found	Not Found	Not Found	Not Found	Not Found	Not Found	Not Found	Not Found	High	Not Found	Peak Found	Not Found	Not Found
	FALSE	High	[K].VSHLLGINVTDFTR.[G]			1	1	18	P35579	P35579 [374-387]	0	1571.85	0	3.8	50	36.7	267.2	27.6	148.3	88.3	157.3	106.8	108.9		160.2	333.5	58.2	104.3		124.9	24		Peak Found	High	Peak Found	High	Peak Found	High	High	High	High	Peak Found	Not Found	High	High	High	Peak Found	Not Found	High
	FALSE	High	[R].VVFQEFR.[Q]			1	1	5	P35579	P35579 [712-718]	0	924.494	0				483.9	30	3.2	13.7	47.9	258.9	32.8		127.9	562.7	38.4	174.5		26.2			Not Found	Not Found	Not Found	Peak Found	Peak Found	High	Peak Found	Peak Found	High	Peak Found	Not Found	Peak Found	High	Peak Found	High	Not Found	Peak Found
	FALSE	High	[K].SMEAEMIQLQEELAAAER.[A]	2xOxidation [M2; M6]		1	1	2	P35579	P35579 [1677-1694]	0	2080.95	1								566.1				503.1					401.7	329.2		Not Found	Not Found	Not Found	Not Found	Not Found	Not Found	Not Found	High	Not Found	Not Found	Not Found	Peak Found	Not Found	Not Found	Not Found	Not Found	Peak Found
	FALSE	High	[K].SMEAEMIQLQEELAAAER.[A]	1xOxidation [M]		1	1	9	P35579	P35579 [1677-1694]	0	2064.96	0							331.1	63.4				300.8			44.4		1060.2			Not Found	Not Found	Not Found	Not Found	Not Found	Not Found	High	High	Not Found	Not Found	Not Found	Peak Found	Not Found	Not Found	High	Not Found	High
	FALSE	High	[K].SMEAEMIQLQEELAAAER.[A]			1	1	18	P35579	P35579 [1677-1694]	0	2048.96	0		182.9		426.6		104.7	154	58.5	182.7	106			59.8		78.7		446.1			Not Found	High	Not Found	High	Not Found	High	High	Peak Found	High	High	Not Found	Not Found	High	Not Found	High	Not Found	High
	FALSE	High	[R].SMMQDREDQSILCTGESGAGK.[T]	1xCarbamidomethyl [C13]		1	2	2	P35579	P35579 [160-180]	1	2300	0	360.7	425.7		385.7				86	115.8			31.9	80.4	76.6	45.2	192.1				Peak Found	Peak Found	Not Found	High	Not Found	Not Found	Not Found	Peak Found	Peak Found	Not Found	Not Found	Peak Found	Peak Found	Peak Found	Peak Found	Peak Found	Not Found
	FALSE	High	[RK].TQLEELEDELQATEDAK.[L]			3	3	12	P35580; P35749; P35579	P35580 [1546-1562]; P35749 [1546-1562]; P35579 [1539-1555]	0	1961.92	0	64.1	218.2	41.4	40.8	135.7	14.1	75.2	98.4	130.6	38.6	338.6	9.9	65	206.6	91.5	26.4	139	65.9	Shared	Peak Found	High	Peak Found	High	Peak Found	High	Peak Found	Peak Found	High	Peak Found	Peak Found	Peak Found	Peak Found	Peak Found	High	Peak Found	High
	FALSE	High	[R].TVGQLYKEQLAK.[L]			1	1	1	P35579	P35579 [645-656]	1	1377.77	0			349.8	77.2	71.2	57.3	132.8	219.6				132.5		115.6	184.1	229	181.1	49.9		Not Found	Not Found	Peak Found	Peak Found	Peak Found	Peak Found	Peak Found	High	Not Found	Not Found	Not Found	Peak Found	Not Found	Peak Found	Peak Found	Peak Found	Peak Found
	FALSE	High	[K].TELEDTLDSTAAQQELR.[S]			1	1	11	P35579	P35579 [1146-1162]	0	1919.92	0		415.1	48.9	56.9	64.4	5.5	143.9	82.6	102	31.7	181	87.2	19.8	168.2	148.5		172.7	71.4		Not Found	High	Peak Found	High	High	Peak Found	Peak Found	Peak Found	Peak Found	Peak Found	Peak Found	High	Peak Found	High	High	Not Found	High
	FALSE	High	[R].TELADKVTK.[L]			1	1	2	P35579	P35579 [1269-1277]	1	1004.56	0																			No Quan Values	Not Found	Not Found	Not Found	Not Found	Not Found	Not Found	Not Found	Not Found	Not Found	Not Found	Not Found	Not Found	Not Found	Not Found	High	Not Found	Not Found
	FALSE	High	[R].TEMEDLMSSKDDVGK.[S]	2xOxidation [M3; M7]		1	1	14	P35579	P35579 [1504-1518]	1	1716.73	0		153.1						314.1	199.6			256.5		64.6	52.3	274.1	485.8			Not Found	High	Not Found	Not Found	Not Found	Not Found	High	High	Peak Found	Not Found	Not Found	High	Not Found	Peak Found	Peak Found	Peak Found	High
	FALSE	High	[R].TEMEDLMSSKDDVGK.[S]			1	1	4	P35579	P35579 [1504-1518]	1	1684.74	0	76.3	708.6		118			58.8	124.9			515.8				24.6		173			Peak Found	High	Not Found	High	Not Found	Not Found	Peak Found	Peak Found	Not Found	Not Found	Peak Found	Not Found	Not Found	Not Found	Peak Found	Not Found	Peak Found
	FALSE	High	[R].TEMEDLMSSK.[D]			1	1	4	P35579	P35579 [1504-1513]	0	1170.5	0	720			695				44.2	173.5	83.4			83.8							Peak Found	Not Found	Not Found	High	Not Found	Not Found	Not Found	Peak Found	High	Peak Found	Not Found	Not Found	Peak Found	Not Found	Not Found	Not Found	Not Found
	FALSE	High	[R].TFHIFYYLLSGAGEHLK.[T]			1	1	7	P35579	P35579 [273-289]	0	1996.03	0				66.6		136.4			21.8	548.3	216.7		719.5	10.6	13.4	10.1	34	22.6		Not Found	Not Found	Not Found	High	Not Found	High	Not Found	Not Found	Peak Found	High	Peak Found	Not Found	High	Peak Found	Peak Found	Peak Found	Peak Found
	FALSE	High	[K].TDLLLEPYNK.[Y]			1	1	9	P35579	P35579 [290-299]	0	1205.64	0		5		201.9	130.3		76.4	223.8	135.6	60.2		131	352.1	169.8	207		106.8			Not Found	Peak Found	Not Found	High	Peak Found	Not Found	Peak Found	Peak Found	High	Peak Found	Not Found	High	Peak Found	Peak Found	High	Not Found	High
	FALSE	High	[K].TLEEEAKTHEAQIQEMR.[Q]			1	1	6	P35579	P35579 [1175-1191]	1	2042.98	0	486.6	341.2		8.6		12.1	88.5		17.8	19.7	461.3	157		6.1			201.2			Peak Found	High	Not Found	Peak Found	Not Found	Peak Found	High	Not Found	Peak Found	Peak Found	Peak Found	Peak Found	Not Found	Peak Found	Not Found	Not Found	High
	FALSE	High	[K].THEAQIQEMR.[Q]			1	1	6	P35579	P35579 [1182-1191]	0	1242.59	0							529.7										1270.3			Peak Found	Not Found	Not Found	High	Not Found	Not Found	High	Peak Found	Peak Found	Not Found	Peak Found	High	Peak Found	Peak Found	Peak Found	Peak Found	High
	FALSE	High	[R].EEILAQAK.[E]			1	1	3	P35579	P35579 [1662-1669]	0	901.499	1		39.7	190.4		181.9		119.8	309.9	15.6	29.5	264	203.7		263.2		17.1	165.4			Not Found	Peak Found	Peak Found	Not Found	High	Not Found	Peak Found	Peak Found	Peak Found	Peak Found	Peak Found	Peak Found	Not Found	High	Not Found	Peak Found	High
	FALSE	High	[R].EDQSILCTGESGAGK.[T]	1xCarbamidomethyl [C7]		4	8	13	P35580; P35749; P35579; Q7Z406	P35580 [170-184]; P35749 [170-184]; P35579 [166-180]; Q7Z406 [190-204]	0	1551.7	0	90.6	536.9		165.7	52.3	48.4	4.5	39.4	174.8	63.1	326.1	2.3	33.3	93		79.4	21.5	68.6	Shared	Peak Found	High	Not Found	High	Peak Found	High	Peak Found	Peak Found	High	High	Peak Found	Peak Found	High	Peak Found	Not Found	Peak Found	Peak Found
	FALSE	High	[R].ELEDATETADAMNR.[E]	1xOxidation [M12]		1	1	18	P35579	P35579 [1899-1912]	0	1581.67	0	56.4	305.3	75.5	7.6		13.8	162.9	314.5	4.1	11.4	140.4	137.9	18.6	250.4	113.9	15.7	149.4	22.2		Peak Found	High	High	Peak Found	Not Found	High	High	High	Peak Found	Peak Found	Peak Found	High	Peak Found	High	High	Peak Found	High
	FALSE	High	[R].ELEDATETADAMNR.[E]			1	1	18	P35579	P35579 [1899-1912]	0	1565.67	0		134.2	105.1	242.6	3.3	35.6	31.6	93.5	77.8	62.2	122.8	38.3	95.1	244	92.8	143.2	245.7	32.2		Not Found	High	Peak Found	Peak Found	Peak Found	High	Peak Found	High	High	High	Peak Found	High	High	Peak Found	High	Peak Found	Peak Found
	FALSE	High	[R].ELESQISELQEDLESER.[A]			1	1	22	P35579	P35579 [1108-1124]	0	2033.95	0	3.6	138.5	14.4	14.1	128.2	3.9	154.7	82.1	51.2	40.8	504.2	49.3	58.6	218.2	58		232.4	47.8		Peak Found	High	Peak Found	High	High	Peak Found	High	High	High	High	Peak Found	High	High	Peak Found	High	Not Found	High
[truncated: 34,505 more rows]
[truncated: 25 more columns]

## Sheet: REVIGO Input files
Data Via GoRILLA
[truncated: 196 more rows]

[truncated: 1 more sheets: Kinases]
