# Supplementary material for: Comprehending Meningioma Signaling Cascades Using Multipronged Proteomics Approaches & Targeted Validation of Potential Markers
Source: Front Oncol. 2020 Aug 26;10:1600. doi: 10.3389/fonc.2020.01600 (PMC7482667; doi:10.3389/fonc.2020.01600)
Supplement: Supplementary file 7 [file Table_7.xlsx]

## Sheet: SM LFQ
Checked	Protein FDR Confidence: Combined	Master	Accession	Description	# Unique Peptides	Gene Symbol	Abundances (Normalized): F1: Sample	Abundances (Normalized): F2: Sample	Abundances (Normalized): F3: Sample	Abundances (Normalized): F4: Sample	Abundances (Normalized): F5: Sample	Abundances (Normalized): F6: Sample	Abundances (Normalized): F7: Sample	Abundances (Normalized): F8: Sample	Abundances (Normalized): F9: Sample	Abundances (Normalized): F10: Sample	Abundances (Normalized): F11: Sample	Abundances (Normalized): F12: Sample	Abundances (Normalized): F13: Sample	Abundances (Normalized): F14: Sample	Abundances (Normalized): F15: Sample	Abundances (Normalized): F16: Sample	Abundances (Normalized): F17: Sample	Abundances (Normalized): F18: Sample	Abundances (Normalized): F19: Sample	Abundances (Normalized): F20: Sample	Abundances (Normalized): F21: Sample	Abundances (Normalized): F22: Sample	Abundances (Normalized): F23: Sample	Abundances (Normalized): F24: Sample	Abundances (Normalized): F25: Sample	Abundances (Normalized): F26: Sample	Abundances (Normalized): F27: Sample	Abundances (Normalized): F28: Sample	Abundances (Normalized): F29: Sample	Abundances (Normalized): F30: Sample	Abundances (Normalized): F31: Sample
TRUE	High	Master Protein	Q09666	Neuroblast differentiation-associated protein AHNAK OS=Homo sapiens OX=9606 GN=AHNAK PE=1 SV=2	370	AHNAK	2.54534e+10	1.03461e+10	2.76786e+09	1.19502e+10	7.23609e+09	1.05675e+10	7.26268e+09	5.15338e+09	1.05272e+10	1.76082e+10	6.53141e+09	3.30755e+09	7.08876e+09	3.97276e+09	8.97121e+09	7.56152e+09	8.09718e+09	3.83478e+09	2.596e+09	1.50224e+09	7.76253e+09	1.16139e+10	9.79823e+09	5.47862e+09	4.64087e+09	5.02797e+09	3.27797e+09	6.14176e+09	8.4151e+09	1.2068e+10	1.38513e+10
TRUE	High	Master Protein	Q15149	Plectin OS=Homo sapiens OX=9606 GN=PLEC PE=1 SV=3	246	PLEC	1.00315e+10	5.69378e+09	3.23593e+09	5.3834e+09	5.10784e+09	5.57203e+09	2.84485e+09	3.32495e+09	5.90597e+09	9.18361e+09	4.5075e+09	1.98029e+09	3.32271e+09	1.41081e+09	4.31327e+09	2.56577e+09	3.09033e+09	2.34867e+09	1.07606e+09	6.88661e+08	4.68122e+09	5.12858e+09	4.87511e+09	2.46894e+09	3.0667e+09	4.93011e+09	3.267e+09	5.42543e+09	8.10828e+09	3.91666e+09	6.84278e+09
TRUE	High	Master Protein	Q13813	Spectrin alpha chain, non-erythrocytic 1 OS=Homo sapiens OX=9606 GN=SPTAN1 PE=1 SV=3	15	SPTAN1	7.08159e+09	6.42248e+09	2.53775e+09	5.31754e+09	3.34472e+09	6.86151e+09	4.95081e+09	4.25703e+09	5.48368e+09	5.77045e+09	4.40689e+09	1.99086e+09	4.30005e+09	1.47002e+09	5.51106e+09	2.85762e+09	3.57614e+09	2.50377e+09	1.75065e+09	9.13631e+08	4.05993e+09	5.88191e+09	5.35678e+09	1.64101e+09	4.20904e+09	4.32147e+09	4.89766e+09	3.50027e+09	6.496e+09	5.80517e+09	7.05384e+09
TRUE	High	Master Protein	Q01082	Spectrin beta chain, non-erythrocytic 1 OS=Homo sapiens OX=9606 GN=SPTBN1 PE=1 SV=2	160	SPTBN1	5.12273e+09	4.52172e+09	1.86599e+09	3.68317e+09	2.18549e+09	4.55915e+09	3.27764e+09	3.13592e+09	3.61562e+09	3.52061e+09	3.33817e+09	1.04199e+09	2.67797e+09	9.79397e+08	3.60339e+09	2.58448e+09	2.67821e+09	1.67194e+09	7.99968e+08	9.15125e+08	2.65745e+09	3.55049e+09	2.56715e+09	1.79913e+09	1.39836e+09	2.30748e+09	1.99684e+09	1.94618e+09	3.3199e+09	3.43455e+09	2.81561e+09
TRUE	High	Master Protein	P02768	Serum albumin OS=Homo sapiens OX=9606 GN=ALB PE=1 SV=2	99	ALB	1.67236e+10	2.34101e+10	3.15922e+10	3.74614e+10	3.3793e+10	2.89431e+10	6.7675e+10	6.23862e+10	3.24027e+10	2.25056e+10	2.76738e+10	5.82629e+10	5.01725e+10	1.20861e+11	1.96015e+10	1.96878e+10	2.82864e+10	9.94644e+10	6.72192e+10	5.89493e+10	2.47978e+10	3.67184e+10	3.87159e+10	9.28513e+10	4.00193e+10	2.71923e+10	4.24497e+10	2.13362e+10	1.23629e+10	4.17799e+10	4.35294e+10
TRUE	High	Master Protein	O75369	Filamin-B OS=Homo sapiens OX=9606 GN=FLNB PE=1 SV=2	144	FLNB	6.12923e+09	4.20164e+09	1.76708e+09	4.56299e+09	3.7106e+09	4.06275e+09	2.81966e+09	2.31008e+09	3.46879e+09	5.64577e+09	3.84854e+09	1.50977e+09	2.27106e+09	1.34124e+09	4.75472e+09	2.36971e+09	2.44434e+09	1.96747e+09	7.84656e+08	3.34659e+08	5.77817e+09	3.34707e+09	3.33794e+09	3.53092e+09	9.37846e+08	1.76151e+09	1.19639e+09	1.35409e+09	1.76409e+09	2.54221e+09	3.51112e+09
TRUE	High	Master Protein	P35579	Myosin-9 OS=Homo sapiens OX=9606 GN=MYH9 PE=1 SV=4	125	MYH9	3.37923e+09	6.45508e+09	2.55543e+09	4.25839e+09	1.82824e+09	2.69414e+09	3.99966e+09	3.89821e+09	4.81009e+09	3.479e+09	4.45237e+09	3.33539e+09	2.94526e+09	1.25289e+09	2.58494e+09	2.75354e+09	2.92152e+09	1.80477e+09	8.94719e+08	8.50747e+08	3.42382e+09	4.26823e+09	3.09717e+09	1.72581e+09	2.80724e+09	2.13289e+09	1.87046e+09	1.7528e+09	2.05567e+09	1.38151e+09	2.11094e+09
TRUE	High	Master Protein	P12111	Collagen alpha-3(VI) chain OS=Homo sapiens OX=9606 GN=COL6A3 PE=1 SV=5	152	COL6A3	2.71915e+09	1.22729e+09	5.84608e+09	2.48576e+09	1.43096e+09	2.62091e+09	2.94851e+09	1.92768e+09	1.41961e+09	1.47317e+09	2.59007e+09	3.72721e+09	6.16447e+09	2.81286e+09	2.39728e+09	4.37882e+09	5.0933e+09	3.53088e+09	3.49302e+09	3.39967e+09	1.47546e+10	2.10585e+09	3.59897e+09	1.32456e+09	4.14085e+09	5.46129e+09	4.0191e+09	4.79665e+09	1.37561e+09	2.46845e+09	2.36075e+09
TRUE	High	Master Protein	Q14204	Cytoplasmic dynein 1 heavy chain 1 OS=Homo sapiens OX=9606 GN=DYNC1H1 PE=1 SV=5	182	DYNC1H1	1.09019e+09	1.0161e+09	7.85399e+08	1.25094e+09	8.50202e+08	1.55356e+09	7.22097e+08	7.92894e+08	9.39741e+08	1.06398e+09	1.03247e+09	6.60123e+08	5.39089e+08	4.28017e+08	8.80207e+08	1.08188e+09	7.07384e+08	6.12644e+08	2.78647e+08	2.23049e+08	1.13772e+09	1.04297e+09	1.11823e+09	4.4005e+08	4.72269e+08	9.72273e+08	9.23084e+08	6.73206e+08	1.07044e+09	6.59207e+08	1.18054e+09
TRUE	High	Master Protein	P21333	Filamin-A OS=Homo sapiens OX=9606 GN=FLNA PE=1 SV=4	119	FLNA	2.03025e+09	2.17283e+09	1.34931e+09	1.61254e+09	9.69983e+08	3.15742e+09	1.12425e+09	1.3054e+09	2.0582e+09	2.07667e+09	1.58385e+09	1.65103e+09	2.46761e+09	2.03932e+09	1.82977e+09	1.26711e+09	1.5987e+09	1.35283e+09	1.01963e+09	7.12051e+08	2.46555e+09	2.52716e+09	1.14405e+09	6.60661e+08	9.27876e+08	2.82038e+09	4.39088e+09	2.72089e+09	1.92897e+09	1.12717e+09	4.07052e+09
TRUE	High	Master Protein	P15924	Desmoplakin OS=Homo sapiens OX=9606 GN=DSP PE=1 SV=3	171	DSP	7.70904e+08	2.21694e+09	8.69797e+08	2.16763e+09	9.25961e+08	1.88065e+09	2.92385e+09	3.36367e+09	2.71775e+09	2.1798e+09	2.02982e+09	7.52254e+08	7.13544e+08	6.22619e+08	1.16192e+09	6.43331e+08	2.49245e+09	5.86422e+08	2.98747e+08	3.67415e+08	1.68702e+09	3.20176e+09	1.51093e+09	1.08878e+09	1.33579e+09	1.52738e+09	5.01069e+08	1.50958e+09	1.8197e+09	1.45876e+09	2.89939e+09
TRUE	High	Master Protein	A0A0D9SF54	Spectrin alpha chain, non-erythrocytic 1 OS=Homo sapiens OX=9606 GN=SPTAN1 PE=1 SV=1	14	SPTAN1	1.73002e+08	1.58253e+08	3.16969e+07	9.29815e+07	9.11672e+07	1.4407e+08	8.7177e+07	7.99251e+07	9.3778e+07	1.06632e+08	1.11681e+08	9.13915e+06	1.18138e+08	1.35421e+07	6.80529e+07	1.47362e+07	7.20147e+07	1.38378e+08	7.58587e+06	9.25743e+06	6.10192e+07	6.7856e+07	5.61882e+06	7.25088e+06	2.76753e+07	4.02391e+07	7.64999e+07	3.2892e+07	1.42493e+08	5.02505e+07	1.85723e+08
TRUE	High	Master Protein	Q9Y490	Talin-1 OS=Homo sapiens OX=9606 GN=TLN1 PE=1 SV=3	111	TLN1	1.99243e+09	1.70339e+09	1.04803e+09	2.14976e+09	1.06462e+09	1.28009e+09	1.06383e+09	1.19076e+09	1.46703e+09	1.82116e+09	1.32134e+09	1.25416e+09	1.0231e+09	5.07653e+08	9.96502e+08	9.23975e+08	1.27641e+09	5.51226e+08	2.33999e+08	3.21767e+08	1.67317e+09	2.41559e+09	7.79182e+08	1.34889e+09	8.51095e+08	1.14349e+09	1.10937e+09	1.06082e+09	2.12994e+09	1.40495e+09	1.81996e+09
TRUE	High	Master Protein	P98160	Basement membrane-specific heparan sulfate proteoglycan core protein OS=Homo sapiens OX=9606 GN=HSPG2 PE=1 SV=4	125	HSPG2	4.64371e+08	6.96935e+08	1.17499e+09	7.5618e+08	3.92802e+08	9.9621e+08	9.75232e+08	7.1612e+08	5.35179e+08	3.5121e+08	4.01535e+08	6.0693e+08	1.1254e+09	6.21087e+08	3.65519e+08	1.32046e+09	7.05466e+08	4.62433e+08	4.07698e+08	3.55058e+08	9.71924e+08	1.02829e+09	4.97707e+08	3.26917e+08	1.19563e+09	1.53736e+09	1.85968e+09	2.03408e+09	6.66173e+08	9.46332e+08	4.27682e+08
TRUE	High	Master Protein	Q02952	A-kinase anchor protein 12 OS=Homo sapiens OX=9606 GN=AKAP12 PE=1 SV=4	92	AKAP12	7.73727e+08	1.838e+09	1.80463e+08	2.41921e+09	1.03935e+09	7.66395e+08	2.76083e+09	9.74218e+08	8.69513e+08	6.88017e+09	3.43246e+08	2.89001e+08	1.94436e+08	8.86015e+07	4.78064e+08	2.54596e+08	5.24073e+08	1.8962e+08	1.10607e+08	7.08229e+07	1.50384e+09	4.10236e+09	5.92573e+08	1.88502e+09	1.08931e+08	2.36256e+08	2.82791e+08	2.17979e+08	4.40305e+08	1.18717e+09	1.21959e+09
TRUE	High	Master Protein	P08670	Vimentin OS=Homo sapiens OX=9606 GN=VIM PE=1 SV=4	68	VIM	5.36813e+10	1.06285e+11	1.4103e+11	5.2466e+10	1.02163e+11	3.95964e+10	1.11395e+11	1.15898e+11	1.62007e+11	4.22365e+10	1.03371e+11	1.21453e+10	5.48174e+10	2.04788e+10	3.39025e+10	3.86198e+09	7.59159e+10	4.49162e+10	6.77188e+09	2.35633e+10	4.84778e+10	5.66254e+10	3.09238e+10	3.03457e+10	4.02728e+10	4.63667e+10	1.36684e+10	4.45115e+10	3.43822e+10	5.58447e+10	5.03527e+10
TRUE	High	Master Protein	Q00610	Clathrin heavy chain 1 OS=Homo sapiens OX=9606 GN=CLTC PE=1 SV=5	80	CLTC	2.09171e+09	2.28962e+09	1.25688e+09	3.53034e+09	1.17936e+09	2.59922e+09	1.30424e+09	1.41772e+09	2.49846e+09	2.33317e+09	1.90127e+09	1.1544e+09	1.02224e+09	4.19387e+08	2.23292e+09	2.61126e+09	8.06752e+08	6.60331e+08	2.58547e+08	3.15273e+08	2.55478e+09	2.31132e+09	1.24402e+09	3.64737e+09	5.04443e+08	1.07184e+09	2.2474e+09	7.11478e+08	1.73145e+09	9.67758e+08	2.04174e+09
TRUE	High	Master Protein	P02751	Fibronectin OS=Homo sapiens OX=9606 GN=FN1 PE=1 SV=4	87	FN1	1.931e+09	3.60665e+09	5.79861e+09	1.76067e+09	4.7631e+08	2.9407e+09	5.332e+09	1.06287e+09	2.05059e+09	4.61621e+09	1.15867e+09	8.13365e+08	1.85884e+09	8.21164e+08	1.38879e+09	7.76556e+08	1.6746e+09	8.55666e+08	6.03686e+08	1.91498e+09	4.33741e+09	3.06169e+09	7.35382e+08	7.36261e+08	4.18789e+08	1.56414e+09	1.39388e+09	1.25516e+09	1.96813e+09	1.6679e+09	1.21566e+09
TRUE	High	Master Protein	P01024	Complement C3 OS=Homo sapiens OX=9606 GN=C3 PE=1 SV=2	111	C3	4.62407e+08	5.07496e+08	2.24542e+09	6.84623e+08	1.18342e+09	9.66991e+08	9.5935e+08	1.63448e+09	8.44712e+08	1.01708e+09	1.20901e+09	3.77065e+09	1.6658e+09	2.01838e+09	1.1386e+09	7.95114e+08	9.76654e+08	2.89075e+09	1.72844e+09	2.43368e+09	8.51397e+08	1.00249e+09	7.77369e+09	6.39583e+08	1.84199e+09	1.3857e+09	2.70683e+09	1.84558e+09	9.83308e+08	2.18482e+09	8.70183e+08
TRUE	High	Master Protein	P35555	Fibrillin-1 OS=Homo sapiens OX=9606 GN=FBN1 PE=1 SV=3	74	FBN1	4.7487e+09	6.6412e+08	1.52481e+09	2.84148e+09	1.07073e+09	8.69776e+09	3.45613e+08	4.93468e+08	1.05444e+09	2.93479e+09	1.26815e+09	1.36689e+09	1.42809e+09	5.10244e+08	3.00636e+09	6.0324e+08	2.47472e+09	6.09999e+08	5.44822e+08	2.66024e+08	4.16346e+09	2.22046e+09	5.19118e+09	2.85513e+09	1.04512e+09	1.21869e+09	9.52289e+08	1.90496e+09	1.83779e+09	2.49263e+09	3.42876e+09
TRUE	High	Master Protein	Q07954	Prolow-density lipoprotein receptor-related protein 1 OS=Homo sapiens OX=9606 GN=LRP1 PE=1 SV=2	115	LRP1	8.73663e+08	8.7264e+08	3.24896e+08	9.79665e+08	6.93676e+08	1.20931e+09	5.95915e+08	5.9084e+08	9.39701e+08	9.524e+08	1.00548e+09	4.93017e+08	5.44061e+08	2.28805e+08	7.90358e+08	5.89296e+08	5.43826e+08	4.26891e+08	1.93463e+08	1.2642e+08	8.51158e+08	9.2623e+08	6.44964e+08	3.79665e+08	1.72916e+08	3.89731e+08	2.59618e+08	3.60455e+08	5.67297e+08	5.24596e+08	7.83089e+08
TRUE	High	Master Protein	P35580	Myosin-10 OS=Homo sapiens OX=9606 GN=MYH10 PE=1 SV=3	76	MYH10	7.32951e+08	4.9527e+08	2.78055e+08	3.77337e+08	3.13101e+08	4.93796e+08	3.59107e+08	1.87923e+08	2.94679e+08	5.11118e+08	3.62923e+08	2.62598e+08	5.33175e+08	2.51419e+08	1.91337e+08	7.18912e+08	2.03037e+08	3.02609e+08	1.95342e+08	2.00417e+08	1.24914e+09	5.51746e+08	4.46503e+08	2.77067e+08	1.10029e+08	3.78239e+08	4.05312e+08	2.18486e+08	1.68461e+08	1.83445e+08	2.32366e+08
TRUE	High	Master Protein	P78527	DNA-dependent protein kinase catalytic subunit OS=Homo sapiens OX=9606 GN=PRKDC PE=1 SV=3	143	PRKDC	4.15761e+08	6.80495e+08	2.65273e+08	6.77239e+08	4.52516e+08	5.27491e+08	3.7251e+08	3.39553e+08	5.46866e+08	5.74457e+08	4.62255e+08	1.0648e+09	3.65316e+08	1.14699e+08	9.24267e+08	1.45155e+09	2.36365e+09	2.73375e+08	9.32961e+07	1.25037e+08	1.27568e+09	7.57204e+08	1.2792e+09	4.60126e+08	7.44999e+08	7.42176e+08	3.06462e+08	6.22659e+08	8.0156e+08	5.86644e+08	9.52172e+08
TRUE	High	Master Protein	P02787	Serotransferrin OS=Homo sapiens OX=9606 GN=TF PE=1 SV=3	69	TF	1.53703e+09	2.62818e+09	3.35083e+09	3.64171e+09	2.98872e+09	3.21507e+09	7.6742e+09	7.60141e+09	3.07071e+09	3.21985e+09	5.41832e+09	4.08855e+09	4.32538e+09	1.55901e+10	1.85608e+09	2.17564e+09	2.49077e+09	8.53079e+09	6.23701e+09	6.65934e+09	2.25369e+09	2.85419e+09	4.25278e+09	2.17508e+09	4.06023e+09	3.00852e+09	2.90608e+09	2.2687e+09	1.58213e+09	4.97839e+09	2.40736e+09
TRUE	High	Master Protein	P04114	Apolipoprotein B-100 OS=Homo sapiens OX=9606 GN=APOB PE=1 SV=2	138	APOB	2.92131e+08	4.59925e+08	2.45942e+08	1.78753e+08	1.69891e+08	3.20311e+08	1.66795e+08	1.80386e+08	1.56611e+08	1.39221e+08	3.34396e+08	3.97559e+08	2.63198e+08	4.86802e+08	1.76258e+08	2.61889e+08	3.65609e+08	6.08332e+08	5.66056e+08	7.05495e+08	4.60207e+08	3.37938e+08	4.3135e+08	7.06309e+08	5.06732e+08	3.5047e+08	4.60102e+08	2.38998e+08	2.21896e+08	3.0394e+08	2.60367e+08
TRUE	High	Master Protein	P02549	Spectrin alpha chain, erythrocytic 1 OS=Homo sapiens OX=9606 GN=SPTA1 PE=1 SV=5	99	SPTA1	5.40319e+07	3.42544e+08	2.11937e+08	1.58206e+08	2.74147e+08	1.42312e+08	8.15615e+07	1.76426e+08	1.76005e+08	1.44524e+08	3.8051e+08	2.95033e+08	8.20052e+07	8.6852e+07	2.59382e+08	2.00318e+08	3.42269e+08	1.0715e+08	1.67278e+08	7.11756e+08	1.46645e+08	2.18533e+08	3.26792e+08	2.04651e+08	6.52469e+08	4.92596e+08	2.75191e+08	3.5575e+08	2.6518e+08	2.66305e+08	8.98844e+08
TRUE	High	Master Protein	P0C0L5	Complement C4-B OS=Homo sapiens OX=9606 GN=C4B PE=1 SV=2	13	C4B; C4B_2; LOC100293534	1.66294e+08	3.2549e+08	9.93294e+08	3.85862e+08	5.65847e+08	3.97353e+08	4.30591e+08	5.1298e+08	8.46832e+08	3.01e+08	6.17014e+08	7.67096e+08	8.79443e+08	1.25386e+09	5.79365e+08	3.35137e+08	6.12339e+08	7.93588e+08	9.83438e+08	9.47827e+08	3.47903e+08	2.63335e+08	6.97062e+08	5.59841e+08	1.25458e+09	7.08977e+08	1.53579e+09	1.06869e+09	4.02301e+08	6.65593e+08	1.78642e+09
TRUE	High	Master Protein	P35749	Myosin-11 OS=Homo sapiens OX=9606 GN=MYH11 PE=1 SV=3	74	MYH11	5.20865e+07	5.25398e+07	7.00045e+07	9.73535e+07	7.28164e+07	6.12231e+07	6.9154e+07	1.41837e+08	6.17046e+07	8.3017e+07	2.0716e+08	1.35271e+08	2.8224e+08	1.64493e+08	1.50502e+08	1.72574e+08	2.06489e+08	1.04831e+08	9.43236e+07	3.38728e+07	2.11928e+08	7.47506e+07	2.30582e+08	1.44141e+08	1.79496e+08	1.00858e+09	2.30861e+09	6.05395e+08	1.17945e+08	4.80285e+07	1.45839e+08
TRUE	High	Master Protein	P69905	Hemoglobin subunit alpha OS=Homo sapiens OX=9606 GN=HBA1 PE=1 SV=2	24	HBA2; HBA1	1.07879e+10	1.06939e+10	1.57196e+10	3.56071e+09	2.81573e+10	3.46164e+10	2.53901e+10	2.28418e+10	6.71951e+09	1.43835e+10	3.68087e+10	5.05126e+10	3.39703e+10	3.01328e+10	5.13818e+10	5.26871e+10	4.6247e+10	3.96618e+10	8.04671e+10	9.26076e+10	5.56057e+09	2.44821e+10	2.40515e+10	3.44604e+10	8.40668e+10	4.6433e+10	4.68706e+10	4.61667e+10	2.80333e+10	3.38005e+10	1.88477e+10
TRUE	High	Master Protein	O43707	Alpha-actinin-4 OS=Homo sapiens OX=9606 GN=ACTN4 PE=1 SV=2	34	ACTN4	1.67397e+09	1.52515e+09	8.03679e+08	1.56467e+09	7.89899e+08	1.92554e+09	9.42468e+08	7.58592e+08	1.77998e+09	1.42818e+09	1.0819e+09	1.42287e+09	1.45842e+09	2.94087e+09	8.21763e+08	2.2244e+09	8.95522e+08	7.89999e+08	2.46048e+09	2.5633e+08	2.17206e+09	1.74895e+09	9.409e+08	8.26012e+08	3.43673e+08	1.31642e+09	2.13798e+09	1.89676e+09	1.01053e+09	6.01726e+08	1.14624e+09
TRUE	High	Master Protein	Q9Y4G6	Talin-2 OS=Homo sapiens OX=9606 GN=TLN2 PE=1 SV=4	73	TLN2	4.36463e+08	5.00757e+08	2.71955e+08	4.37448e+08	3.8547e+08	3.10759e+08	2.64344e+08	3.28147e+08	4.25503e+08	3.6943e+08	4.68351e+08	1.12523e+08	1.51617e+08	9.2188e+07	1.53309e+08	1.68514e+08	3.10581e+08	1.21772e+08	9.36566e+07	3.42804e+07	3.24337e+08	2.63088e+08	2.51159e+08	1.21798e+08	9.75345e+07	2.37237e+08	1.26224e+08	1.78571e+08	1.52367e+08	9.56158e+07	1.03812e+08
TRUE	High	Master Protein	P46821	Microtubule-associated protein 1B OS=Homo sapiens OX=9606 GN=MAP1B PE=1 SV=2	72	MAP1B	4.50556e+08	1.52683e+08	2.17992e+08	4.20987e+08	7.63534e+08	1.88114e+09	2.48132e+08	2.04154e+08	2.91176e+08	6.77503e+08	4.92562e+08	2.43443e+08	4.30395e+08	2.61682e+08	3.91035e+08	4.17533e+08	2.87309e+08	4.19831e+08	1.92954e+08	4.55221e+07	4.67432e+08	3.09495e+08	3.60922e+08	9.07841e+07	1.14183e+08	2.15117e+08	4.92624e+08	1.39326e+08	3.62269e+08	1.71997e+08	3.65286e+08
TRUE	High	Master Protein	P46940	Ras GTPase-activating-like protein IQGAP1 OS=Homo sapiens OX=9606 GN=IQGAP1 PE=1 SV=1	75	IQGAP1	7.93579e+08	6.51628e+08	3.68683e+08	6.43823e+08	4.49668e+08	5.54314e+08	3.52182e+08	3.50683e+08	4.69879e+08	4.93057e+08	5.14582e+08	5.0174e+08	3.48557e+08	1.86091e+08	5.00643e+08	4.05171e+08	2.60542e+08	2.25344e+08	1.4497e+08	7.89987e+07	6.31128e+08	5.7692e+08	9.14115e+08	1.28354e+09	1.94747e+08	3.58384e+08	2.99422e+08	3.26138e+08	7.03043e+08	4.33338e+08	5.08619e+08
TRUE	High	Master Protein	P01023	Alpha-2-macroglobulin OS=Homo sapiens OX=9606 GN=A2M PE=1 SV=3	66	A2M	2.92502e+08	3.43351e+08	5.74288e+08	4.33575e+08	9.17901e+08	6.14914e+08	5.52433e+08	5.45714e+08	3.63443e+08	3.8099e+08	5.85107e+08	2.14125e+09	9.13192e+08	1.62188e+09	7.85263e+08	7.59369e+08	4.89662e+08	1.74734e+09	1.44004e+09	1.30423e+09	6.17957e+08	3.51261e+08	1.83698e+09	2.84609e+08	1.50572e+09	1.63704e+09	1.00363e+09	8.08462e+08	3.44571e+08	5.84908e+08	2.40525e+08
TRUE	High	Master Protein	P11277	Spectrin beta chain, erythrocytic OS=Homo sapiens OX=9606 GN=SPTB PE=1 SV=5	54	SPTB	1.36677e+08	1.16782e+08	1.5732e+08	4.98061e+07	1.17894e+08	1.75435e+08	6.81351e+07	9.45724e+07	5.59062e+07	1.19825e+08	1.57891e+08	2.30818e+08	1.4362e+08	1.03941e+08	2.22704e+08	1.83081e+08	2.6621e+08	2.19405e+08	1.53202e+08	6.08905e+08	1.24537e+08	1.32038e+08	2.53441e+08	1.35965e+08	4.49573e+08	4.20883e+08	2.82532e+08	3.6273e+08	4.28151e+08	3.62804e+08	6.50815e+07
TRUE	High	Master Protein	Q14315	Filamin-C OS=Homo sapiens OX=9606 GN=FLNC PE=1 SV=3	76	FLNC	4.83527e+08	6.25448e+08	3.07853e+08	8.02416e+08	6.16516e+08	3.60621e+08	2.42273e+08	2.76288e+08	4.12954e+08	2.6805e+08	4.27299e+08	1.51092e+08	2.12241e+08	1.01161e+08	3.58135e+08	1.07207e+08	3.60411e+08	1.76424e+08	9.1905e+07	7.72231e+07	2.7522e+08	5.16355e+08	3.42774e+08	6.24224e+08	1.67328e+08	2.06931e+08	2.86418e+08	3.25964e+08	1.55083e+09	2.35624e+08	3.4045e+08
TRUE	High	Master Protein	Q05707	Collagen alpha-1(XIV) chain OS=Homo sapiens OX=9606 GN=COL14A1 PE=1 SV=3	78	COL14A1	2.49556e+08	2.10287e+08	4.95427e+08	1.22175e+08	1.30897e+08	1.9181e+08	6.59149e+08	3.68566e+08	1.22292e+08	7.50082e+07	2.27859e+08	9.33666e+08	3.78879e+09	1.7787e+09	2.01881e+08	7.48452e+08	2.39118e+08	2.11789e+09	1.06219e+09	4.6449e+08	4.3019e+08	1.03591e+08	6.96565e+08	3.3337e+08	8.90646e+08	1.84481e+09	9.35383e+08	1.6301e+09	1.64494e+08	2.94338e+08	8.51854e+07
TRUE	High	Master Protein	Q99715	Collagen alpha-1(XII) chain OS=Homo sapiens OX=9606 GN=COL12A1 PE=1 SV=2	94	COL12A1	2.042e+08	1.67612e+08	2.04679e+08	1.53087e+08	9.67787e+07	7.8776e+07	8.34664e+07	1.09786e+08	1.23752e+08	1.72801e+08	1.34162e+08	9.74997e+08	5.20755e+08	9.55401e+08	1.80716e+08	3.4549e+08	1.68904e+08	9.14616e+08	1.52099e+09	2.39218e+08	3.19484e+08	2.54263e+08	6.96023e+08	1.83849e+08	2.97464e+08	9.18654e+08	4.88452e+08	1.34804e+09	1.23123e+08	2.09888e+08	2.21906e+08
TRUE	High	Master Protein	P12814	Alpha-actinin-1 OS=Homo sapiens OX=9606 GN=ACTN1 PE=1 SV=2	37	ACTN1	4.14609e+08	4.17962e+08	2.423e+08	2.42962e+08	2.39229e+08	3.41868e+08	2.52695e+08	2.49584e+08	3.74054e+08	3.72888e+08	3.59695e+08	6.14348e+08	4.90187e+08	5.33933e+08	3.3491e+08	4.80438e+08	3.01055e+08	3.24603e+08	2.30925e+08	1.09428e+08	4.30298e+08	3.91404e+08	2.30397e+08	2.78019e+07	1.87589e+08	4.61434e+08	7.03039e+08	6.46212e+08	2.70845e+08	1.7923e+08	2.11466e+08
TRUE	High	Master Protein	P02675	Fibrinogen beta chain OS=Homo sapiens OX=9606 GN=FGB PE=1 SV=2	49	FGB	1.93327e+09	4.76392e+08	3.0881e+09	1.52536e+08	1.97986e+09	7.35996e+08	9.01233e+08	1.53003e+09	3.26236e+08	8.2583e+08	2.74435e+09	3.10655e+09	5.23608e+08	1.59528e+09	1.08781e+10	7.375e+08	4.57963e+09	2.57122e+09	1.28468e+09	2.80075e+09	2.55455e+08	8.96822e+08	1.64343e+09	1.18127e+09	1.78308e+09	1.21954e+09	9.70551e+08	2.25406e+09	4.34965e+09	2.64101e+09	6.87972e+08
TRUE	High	Master Protein	P07355	Annexin A2 OS=Homo sapiens OX=9606 GN=ANXA2 PE=1 SV=2	52	ANXA2	1.52375e+10	8.66508e+09	5.07232e+09	1.17138e+10	6.84333e+09	9.58312e+09	1.08355e+10	6.92633e+09	1.0931e+10	1.63369e+10	1.39614e+10	3.1467e+09	7.67844e+09	4.11367e+09	1.60867e+10	7.03311e+08	6.50286e+09	3.89413e+09	2.1941e+09	1.50679e+09	1.09798e+10	8.51003e+09	1.0051e+10	1.08698e+10	1.69642e+09	2.11382e+09	6.89955e+08	2.95133e+09	7.70671e+09	6.6512e+09	1.25169e+10
TRUE	High	Master Protein	K7EMP8	Glial fibrillary acidic protein OS=Homo sapiens OX=9606 GN=GFAP PE=1 SV=2	47	GFAP	2.11858e+08	1.22229e+08	2.69888e+08	1.48244e+08	1.62041e+10	2.10857e+08	1.15998e+08	3.06782e+10	1.12483e+08	2.53776e+08	4.62255e+08	1.93056e+08	3.69715e+08	2.14835e+08	2.04243e+08	2.69374e+09	8.66155e+08	6.58832e+09	1.03202e+08	1.34307e+08	3.93787e+08	1.3743e+08	2.26371e+09	1.45944e+09	1.20645e+09	1.65279e+09	5.47077e+09	4.01022e+09	1.08117e+10	1.94758e+08	4.99149e+08
TRUE	High	Master Protein	P35556	Fibrillin-2 OS=Homo sapiens OX=9606 GN=FBN2 PE=1 SV=3	56	FBN2	4.92665e+08	9.68847e+07	2.58501e+08	2.44818e+08	4.81566e+07	9.58803e+08	4.64255e+07	5.33302e+07	3.00719e+08	1.50214e+09	2.14158e+08	6.96988e+07	5.71987e+07	4.59725e+07	1.52902e+08	1.33241e+08	3.93697e+08	3.89757e+07	1.33456e+09	8.05219e+07	2.18531e+09	1.13573e+09	5.70128e+08	5.94646e+07	2.62979e+07	1.51852e+08	7.45268e+07	8.89778e+07	1.22235e+08	1.9605e+08	2.78481e+08
TRUE	High	Master Protein	P07437	Tubulin beta chain OS=Homo sapiens OX=9606 GN=TUBB PE=1 SV=2	6	TUBB	5.50259e+09	4.01926e+09	2.68054e+09	5.65715e+09	3.85387e+09	9.50689e+09	2.73726e+09	2.33762e+09	3.15723e+09	6.31705e+09	3.19193e+09	1.61673e+09	3.43269e+09	1.95235e+09	3.79248e+09	6.18062e+09	1.84299e+09	3.82355e+09	1.30942e+09	5.18471e+08	3.47672e+09	4.28717e+09	1.08851e+09	6.941e+08	7.46809e+08	2.47587e+09	3.8484e+09	1.77118e+09	2.23535e+09	2.36125e+09	2.83354e+09
TRUE	High	Master Protein	P49327	Fatty acid synthase OS=Homo sapiens OX=9606 GN=FASN PE=1 SV=3	72	FASN	4.15376e+08	2.79424e+08	7.53281e+07	2.84476e+08	1.171e+08	1.25337e+08	7.88344e+07	1.09353e+08	1.28206e+08	3.32273e+08	2.04728e+08	2.12597e+08	1.05373e+08	6.10915e+07	3.48291e+08	2.97854e+08	1.31431e+08	1.13987e+08	5.0945e+07	4.67983e+07	9.55181e+08	4.40878e+08	4.87344e+08	3.5679e+08	7.06904e+07	1.05021e+08	1.22705e+08	8.38042e+07	1.69104e+08	2.04605e+08	2.55261e+08
TRUE	High	Master Protein	P68371	Tubulin beta-4B chain OS=Homo sapiens OX=9606 GN=TUBB4B PE=1 SV=1	1	TUBB4B	9.62995e+08	8.7991e+08	9.81446e+08	7.11513e+08	7.93077e+08	8.48081e+08	6.59209e+08	8.6533e+08	7.0658e+08	4.59531e+08	9.22735e+08	1.0572e+08	2.28875e+08	1.11283e+08	5.14398e+08	5.55292e+08	1.57175e+08	2.2919e+08	7.0261e+07	5.42216e+07	7.03545e+07	4.24375e+08	1.67306e+07	6.74215e+06	5.21131e+07	1.38849e+08	2.34377e+08	1.23864e+08	1.5219e+08	2.30351e+08	1.90696e+08
TRUE	High	Master Protein	P68871	Hemoglobin subunit beta OS=Homo sapiens OX=9606 GN=HBB PE=1 SV=2	25	HBB	1.30873e+10	1.47004e+10	3.08958e+10	6.5919e+09	5.6049e+10	4.66019e+10	4.04657e+10	4.08172e+10	1.41509e+10	2.92763e+10	5.21685e+10	1.19059e+11	5.10331e+10	5.01986e+10	8.43858e+10	1.09562e+11	9.07473e+10	7.43035e+10	1.54832e+11	1.85338e+11	1.03778e+10	4.74464e+10	5.93146e+10	8.83297e+10	1.18171e+11	9.23526e+10	7.80007e+10	7.27802e+10	5.03844e+10	5.8005e+10	3.67964e+10
TRUE	High	Master Protein	P18206	Vinculin OS=Homo sapiens OX=9606 GN=VCL PE=1 SV=4	63	VCL	1.20157e+09	1.3791e+09	6.88762e+08	1.57868e+09	7.96949e+08	9.8887e+08	5.53817e+08	7.37049e+08	1.05628e+09	1.37244e+09	7.32794e+08	5.89782e+08	9.42338e+08	5.44843e+08	6.82937e+08	4.85541e+08	7.93254e+08	3.8263e+08	3.46502e+08	2.58547e+08	6.86646e+08	1.18792e+09	1.45228e+09	9.28888e+08	4.45955e+08	9.66598e+08	8.0604e+08	1.29266e+09	8.99567e+08	8.6731e+08	9.00699e+08
TRUE	High	Master Protein	Q15063	Periostin OS=Homo sapiens OX=9606 GN=POSTN PE=1 SV=2	50	POSTN	6.2445e+08	1.25497e+08	3.50468e+09	6.89486e+07	1.03609e+08	2.79149e+08	1.08071e+08	7.29454e+08	1.33876e+08	1.13201e+08	2.21766e+08	8.98916e+08	1.8886e+08	1.62221e+08	3.3006e+08	1.20274e+08	1.70104e+08	1.36575e+08	6.5185e+07	1.09128e+09	5.03433e+08	7.58377e+07	5.4437e+08	1.98543e+08	1.03104e+08	1.17029e+08	1.98141e+08	2.32591e+08	1.19619e+08	4.04853e+08	1.59226e+09
TRUE	High	Master Protein	Q14980	Nuclear mitotic apparatus protein 1 OS=Homo sapiens OX=9606 GN=NUMA1 PE=1 SV=2	63	NUMA1	2.20358e+08	3.40098e+08	9.29059e+07	2.52817e+08	2.08032e+08	1.45962e+08	1.51248e+08	1.57855e+08	1.18209e+08	1.49624e+08	1.43918e+08	1.74448e+08	9.32552e+07	6.03875e+07	1.62884e+08	1.732e+08	3.3819e+08	8.03821e+07	6.70493e+07	4.43542e+07	2.96885e+08	2.79622e+08	1.27456e+08	2.27448e+08	1.04615e+08	2.19574e+08	7.37477e+07	1.84111e+08	3.07734e+08	1.99159e+08	2.37008e+08
TRUE	High	Master Protein	P04350	Tubulin beta-4A chain OS=Homo sapiens OX=9606 GN=TUBB4A PE=1 SV=2	4	TUBB4A	1.6064e+08	9.74305e+07	5.53742e+07	1.44754e+08	1.81364e+08	1.40896e+08	1.02198e+08	9.82468e+07	4.34822e+07	9.79577e+07	6.79914e+07	1.71286e+07	5.1102e+07	8.06505e+06	2.58674e+07	3.25793e+08	4.56141e+07	1.04719e+08	8.15484e+06	1.69933e+07	4.76078e+07	8.17471e+07	1.70446e+07	4.60384e+06	6.60918e+07	1.07256e+08	5.93476e+08	1.23861e+08	9.83484e+06	8.62616e+07	9.96779e+07
TRUE	High	Master Protein	P14618	Pyruvate kinase PKM OS=Homo sapiens OX=9606 GN=PKM PE=1 SV=4	8	PKM	4.84148e+09	2.72803e+09	2.67733e+09	4.30977e+09	4.36134e+09	3.17476e+09	5.17566e+09	5.04237e+09	3.94496e+09	4.36001e+09	2.95577e+09	2.63061e+09	3.15907e+09	1.44353e+09	4.79855e+09	2.26582e+09	3.15383e+09	2.81245e+09	8.3141e+08	5.02126e+08	1.98999e+09	4.9402e+09	8.33991e+08	3.44887e+08	1.17336e+09	1.38072e+09	1.76559e+09	1.85273e+09	3.28854e+09	3.63359e+09	4.12555e+09
TRUE	High	Master Protein	P22105	Tenascin-X OS=Homo sapiens OX=9606 GN=TNXB PE=1 SV=4	24	TNXB	9.75716e+07	1.5881e+08	1.41364e+08	1.50729e+08	1.19756e+08	2.20159e+08	2.20443e+08	5.49595e+08	1.81657e+08	2.32839e+08	3.35534e+08	1.80065e+08	3.38975e+08	1.47875e+08	5.79124e+08	1.25305e+08	1.78069e+08	1.21654e+08	1.22714e+08	2.03923e+08	4.26054e+08	1.42469e+08	5.92886e+08	3.78841e+08	4.5668e+08	1.85257e+08	1.63378e+08	4.22494e+08	6.8446e+07	6.83228e+08	2.99713e+08
TRUE	High	Master Protein	Q9BVA1	Tubulin beta-2B chain OS=Homo sapiens OX=9606 GN=TUBB2B PE=1 SV=1	1	TUBB2B	2.65529e+07	1.26518e+07	5.2801e+08	1.61851e+07	1.7917e+08	2.38092e+07	1.95367e+07	2.18189e+07	1.5875e+07	4.79889e+07	3.1326e+07	7.34701e+06	9.977e+06	4.59988e+06	7.83535e+06	3.49327e+07	7.2651e+06	4.67655e+07	6.29524e+06	2.78992e+06	2.70699e+06	1.84602e+07	1.81968e+06	693119	7.59963e+06	8.52566e+06	1.50097e+07	1.15977e+07	4.55054e+07	9.89449e+06	9.80554e+06
TRUE	High	Master Protein	P14625	Endoplasmin OS=Homo sapiens OX=9606 GN=HSP90B1 PE=1 SV=1	53	HSP90B1	1.73369e+09	1.36549e+09	8.02853e+08	2.01055e+09	1.10814e+09	2.8842e+09	1.13046e+09	8.62554e+08	1.18481e+09	2.12264e+09	1.06982e+09	8.89303e+08	1.12889e+09	7.49071e+08	1.6814e+09	2.86609e+09	1.12579e+09	5.90945e+08	5.60836e+08	2.23733e+08	2.39242e+09	2.08184e+09	7.86184e+08	9.60622e+08	3.4926e+08	1.12237e+09	2.84895e+08	1.13952e+09	1.24871e+09	1.60868e+09	2.08453e+09
TRUE	High	Master Protein	Q13885	Tubulin beta-2A chain OS=Homo sapiens OX=9606 GN=TUBB2A PE=1 SV=1	3	TUBB2A	2.28342e+08	1.08784e+08	5.46649e+07	1.2231e+08	3.81071e+08	2.39284e+08	5.45165e+07	1.32512e+08	6.84992e+07	2.14016e+08	6.01552e+07	2.54115e+07	6.68641e+07	9.49649e+07	3.47916e+07	5.88316e+08	2.70763e+07	1.53793e+08	8.07517e+07	1.38404e+07	2.55039e+07	6.48436e+07	1.54958e+08	8.41841e+07	1.05691e+08	6.3451e+08	4.65738e+08	1.67353e+08	1.28037e+08	1.44738e+08	8.31349e+07
TRUE	High	Master Protein	Q07157	Tight junction protein ZO-1 OS=Homo sapiens OX=9606 GN=TJP1 PE=1 SV=3	8	TJP1	6.04023e+08	6.64793e+08	1.25036e+08	4.47517e+08	2.72972e+08	2.73813e+08	5.36723e+08	8.51895e+08	5.30917e+08	2.60588e+08	4.03581e+08	1.62196e+08	1.27308e+08	1.07141e+08	2.54801e+08	1.79073e+08	4.08473e+08	8.53393e+07	7.68619e+07	1.13694e+09	2.28004e+08	3.79355e+08	2.99031e+08	1.33405e+08	1.47693e+08	1.52553e+08	7.23747e+07	1.59815e+08	2.22773e+08	1.80611e+08	2.96473e+08
TRUE	High	Master Protein	P08133	Annexin A6 OS=Homo sapiens OX=9606 GN=ANXA6 PE=1 SV=3	30	ANXA6	1.19134e+09	1.34107e+09	2.84728e+09	1.3439e+09	3.45449e+09	1.44645e+09	1.66885e+09	6.82026e+08	1.27949e+09	1.58595e+09	8.00564e+08	1.11505e+09	1.37082e+09	9.90605e+08	1.17097e+09	1.13796e+09	1.22035e+09	1.17483e+09	4.35523e+08	1.06087e+09	6.86848e+08	1.62327e+09	1.89141e+09	4.64155e+08	5.70188e+08	1.24466e+09	1.32443e+09	1.10962e+09	2.03904e+09	1.08164e+09	2.33863e+09
TRUE	High	Master Protein	P02545	Prelamin-A/C OS=Homo sapiens OX=9606 GN=LMNA PE=1 SV=1	17	LMNA	5.49513e+09	5.01133e+09	2.51311e+09	4.04257e+09	3.41262e+09	3.7768e+09	2.98141e+09	2.1469e+09	3.98447e+09	5.75856e+09	5.07289e+09	4.29177e+09	5.44925e+09	3.18761e+09	3.81021e+09	3.94991e+09	3.14107e+09	2.83091e+09	2.43814e+09	2.588e+09	8.79583e+09	4.64423e+09	5.96064e+09	8.13114e+09	3.13421e+09	4.1866e+09	2.16149e+09	3.84982e+09	4.11494e+09	6.47116e+09	4.22295e+09
TRUE	High	Master Protein	P60709	Actin, cytoplasmic 1 OS=Homo sapiens OX=9606 GN=ACTB PE=1 SV=1	14	ACTB	1.75327e+10	1.46476e+10	8.43965e+09	1.88506e+10	1.22076e+10	1.35314e+10	1.04158e+10	7.88342e+09	1.4131e+10	1.44474e+10	1.04258e+10	1.08238e+10	1.37546e+10	7.40802e+09	1.30824e+10	1.40288e+10	9.91568e+09	8.47686e+09	3.94149e+09	2.09187e+09	8.67065e+09	1.5927e+10	5.49142e+09	1.09231e+10	4.18345e+09	1.07154e+10	1.34731e+10	1.66626e+10	1.12389e+10	1.001e+10	1.57957e+10
TRUE	High	Master Protein	P06396	Gelsolin OS=Homo sapiens OX=9606 GN=GSN PE=1 SV=1	29	GSN	2.51978e+09	1.99381e+09	1.19399e+09	2.22644e+09	1.60605e+09	1.72249e+09	1.09068e+09	1.30203e+09	2.28846e+09	1.71235e+09	2.01758e+09	1.65118e+09	1.43673e+09	1.00694e+09	1.63752e+09	1.68019e+09	1.15913e+09	1.03401e+09	4.45648e+08	3.83152e+08	1.57634e+09	1.80751e+09	5.91408e+09	3.07512e+09	5.03914e+08	7.16944e+08	6.45199e+08	9.3337e+08	4.94643e+08	1.55466e+09	1.74819e+09
TRUE	High	Master Protein	P07900	Heat shock protein HSP 90-alpha OS=Homo sapiens OX=9606 GN=HSP90AA1 PE=1 SV=5	37	HSP90AA1	2.45516e+09	1.99574e+09	1.10858e+09	2.75605e+09	1.4646e+09	2.20742e+09	7.73076e+08	1.09948e+09	1.65035e+09	2.87551e+09	1.37184e+09	1.84324e+09	1.15739e+09	6.31752e+08	2.39411e+09	3.0672e+09	1.83189e+09	1.18042e+09	4.39927e+08	3.07257e+08	3.70997e+09	2.85186e+09	1.64714e+09	1.00235e+09	5.33216e+08	1.15102e+09	1.62847e+09	9.12123e+08	3.40507e+09	2.1271e+09	2.4999e+09
TRUE	High	Master Protein	P13639	Elongation factor 2 OS=Homo sapiens OX=9606 GN=EEF2 PE=1 SV=4	54	EEF2	1.6561e+09	1.36304e+09	7.96791e+08	1.70738e+09	6.71984e+08	1.20062e+09	6.40229e+08	4.83107e+08	9.76375e+08	8.97477e+08	7.6303e+08	4.53838e+08	4.75645e+08	3.09105e+08	9.15888e+08	6.8527e+08	5.42319e+08	2.1042e+08	1.5769e+08	7.92307e+07	1.19892e+09	1.04405e+09	5.27401e+08	4.99252e+08	2.00977e+08	2.37607e+08	2.34946e+08	2.24293e+08	6.48724e+08	4.77769e+08	9.77858e+08
TRUE	High	Master Protein	P22314	Ubiquitin-like modifier-activating enzyme 1 OS=Homo sapiens OX=9606 GN=UBA1 PE=1 SV=3	52	UBA1	9.39842e+08	9.92365e+08	6.82633e+08	9.2722e+08	5.6611e+08	8.96956e+08	4.95535e+08	4.73626e+08	1.02893e+09	1.26674e+09	1.12392e+09	2.93557e+08	3.42886e+08	1.86394e+08	7.20983e+08	9.8055e+08	4.82229e+08	2.53996e+08	1.4275e+08	1.5702e+08	1.26361e+09	7.255e+08	3.11304e+08	1.5526e+08	2.05137e+08	3.12535e+08	3.06371e+08	3.20879e+08	6.39513e+08	5.26751e+08	9.88722e+08
TRUE	High	Master Protein	P08238	Heat shock protein HSP 90-beta OS=Homo sapiens OX=9606 GN=HSP90AB1 PE=1 SV=4	32	HSP90AB1	6.81603e+08	7.32718e+08	3.59498e+08	1.02942e+09	4.87495e+08	5.69754e+08	5.16725e+08	4.08308e+08	5.77711e+08	8.38715e+08	4.52099e+08	5.91058e+08	3.05332e+08	2.61663e+08	3.96835e+08	9.06767e+08	3.62678e+08	2.45172e+08	1.1166e+08	7.9848e+07	1.67286e+09	8.58825e+08	6.396e+08	2.47137e+08	1.01301e+08	3.26395e+08	3.80304e+08	2.22572e+08	9.56303e+08	6.57928e+08	6.08888e+08
TRUE	High	Master Protein	P04406	Glyceraldehyde-3-phosphate dehydrogenase OS=Homo sapiens OX=9606 GN=GAPDH PE=1 SV=3	32	GAPDH	6.52771e+09	3.84085e+09	2.81929e+09	5.03409e+09	3.69533e+09	4.17389e+09	4.02021e+09	3.12172e+09	3.95399e+09	5.49261e+09	3.56604e+09	7.67555e+08	2.24005e+09	9.62074e+08	2.21282e+09	1.45383e+09	2.08729e+09	1.61742e+09	6.01335e+08	9.58403e+08	2.11568e+09	1.7161e+09	4.52623e+08	5.87297e+08	5.77923e+08	6.078e+08	2.16366e+09	7.50612e+08	2.24423e+09	1.89237e+09	3.46099e+09
TRUE	High	Master Protein	P55072	Transitional endoplasmic reticulum ATPase OS=Homo sapiens OX=9606 GN=VCP PE=1 SV=4	51	VCP	1.23971e+09	1.45151e+09	8.7134e+08	1.56438e+09	8.6657e+08	1.25779e+09	8.6674e+08	1.03676e+09	1.26525e+09	1.62655e+09	9.20545e+08	6.81376e+08	9.84398e+08	3.19215e+08	5.39949e+08	8.90754e+08	7.86634e+08	5.09409e+08	2.9477e+08	1.03511e+09	1.14347e+09	1.37809e+09	1.03047e+09	2.79532e+08	3.98867e+08	6.47136e+08	5.51612e+08	6.76458e+08	1.36158e+09	9.01939e+08	1.30316e+09
TRUE	High	Master Protein	Q14697	Neutral alpha-glucosidase AB OS=Homo sapiens OX=9606 GN=GANAB PE=1 SV=3	13	GANAB	7.34565e+08	8.82169e+08	7.69444e+08	1.07629e+09	1.26917e+09	8.47897e+08	1.20366e+09	7.09352e+08	6.99296e+08	7.99762e+08	5.42896e+08	4.91311e+08	4.84847e+08	1.87393e+08	5.24012e+08	9.391e+08	6.17026e+08	3.35801e+08	9.51102e+08	1.13087e+08	9.64425e+08	5.23683e+08	1.41164e+09	1.32375e+09	3.4607e+09	4.99585e+08	2.39886e+08	5.01988e+08	1.8283e+09	1.32897e+09	7.66804e+08
TRUE	High	Master Protein	P0DMV9	Heat shock 70 kDa protein 1B OS=Homo sapiens OX=9606 GN=HSPA1B PE=1 SV=1	28	HSPA1A; HSPA1B	1.10125e+09	1.9313e+09	8.22487e+08	1.52037e+09	2.35601e+09	1.18926e+09	9.81388e+08	1.07447e+09	1.47507e+09	1.10048e+09	1.20625e+09	9.0816e+08	2.0267e+09	8.51582e+08	1.29454e+09	1.96227e+09	7.75572e+08	1.29394e+09	4.40696e+08	2.77729e+08	1.42454e+09	1.32406e+09	2.01254e+09	3.37662e+08	3.64421e+08	5.23451e+08	5.44993e+08	6.29121e+08	1.32516e+09	6.19006e+08	4.96008e+08
TRUE	High	Master Protein	O43491	Band 4.1-like protein 2 OS=Homo sapiens OX=9606 GN=EPB41L2 PE=1 SV=1	29	EPB41L2	2.85133e+08	5.62764e+08	4.1235e+08	5.16495e+08	2.25837e+08	4.54987e+08	3.98411e+08	3.87978e+08	6.37466e+08	7.3427e+08	2.52769e+08	1.6077e+08	2.14003e+08	1.11925e+08	3.29601e+08	2.56298e+08	2.61842e+08	1.59644e+08	6.45785e+07	5.32176e+07	3.38044e+08	6.10177e+08	3.30267e+08	1.58401e+08	2.54939e+08	3.7075e+08	2.38182e+08	3.0175e+08	5.52845e+08	2.25988e+08	4.33736e+08
TRUE	High	Master Protein	P08603	Complement factor H OS=Homo sapiens OX=9606 GN=CFH PE=1 SV=4	49	CFH	2.56511e+08	1.62991e+08	2.58466e+08	1.51092e+08	1.80853e+08	2.34369e+08	1.77918e+08	2.18831e+08	1.78398e+08	1.15771e+08	3.48885e+08	2.90831e+08	6.65682e+08	6.95671e+08	2.25935e+08	5.97855e+08	2.82022e+08	7.62079e+08	4.22054e+08	5.39397e+08	2.72122e+08	1.78445e+08	2.30602e+08	1.28541e+08	5.24216e+08	3.30923e+08	5.59165e+08	3.75913e+08	1.13382e+08	3.525e+08	2.46266e+08
TRUE	High	Master Protein	P11142	Heat shock cognate 71 kDa protein OS=Homo sapiens OX=9606 GN=HSPA8 PE=1 SV=1	30	HSPA8	3.48776e+09	3.15468e+09	2.17407e+09	3.23488e+09	2.56939e+09	2.78151e+09	2.23154e+09	1.90823e+09	2.98938e+09	3.54663e+09	2.38204e+09	2.37788e+09	1.75919e+09	9.61886e+08	2.43125e+09	2.46157e+09	1.44124e+09	1.79217e+09	1.46396e+09	6.5644e+08	3.20972e+09	3.07541e+09	1.38315e+09	4.90277e+08	5.00341e+08	8.75097e+08	1.26862e+09	9.65143e+08	2.1581e+09	1.82042e+09	1.71463e+09
TRUE	High	Master Protein	Q15582	Transforming growth factor-beta-induced protein ig-h3 OS=Homo sapiens OX=9606 GN=TGFBI PE=1 SV=1	36	TGFBI	3.63892e+08	7.241e+07	2.76488e+08	2.24969e+08	7.91986e+07	6.08501e+08	1.80923e+09	6.91534e+08	1.3645e+08	3.04391e+08	7.1175e+08	4.04674e+08	4.26697e+08	3.26536e+08	9.10197e+08	5.22001e+08	3.12614e+08	4.33375e+08	4.97337e+08	9.32263e+07	1.73401e+09	1.68267e+08	2.55813e+08	2.91698e+08	3.26654e+08	1.68392e+08	2.63906e+08	3.48159e+08	9.5588e+07	4.34394e+09	1.84667e+08
TRUE	High	Master Protein	P12109	Collagen alpha-1(VI) chain OS=Homo sapiens OX=9606 GN=COL6A1 PE=1 SV=3	40	COL6A1	7.51737e+08	4.22801e+08	1.875e+09	1.02021e+09	5.26268e+08	9.77632e+08	9.28078e+08	4.25838e+08	6.4989e+08	6.66283e+08	8.30748e+08	8.86283e+08	1.67074e+09	8.96015e+08	7.29362e+08	1.18491e+09	9.46098e+08	1.37556e+09	1.09342e+09	9.06023e+08	4.50979e+09	7.21702e+08	6.62147e+08	1.79951e+08	9.80836e+08	1.29268e+09	1.89436e+09	1.70948e+09	3.69084e+08	5.26505e+08	5.74155e+08
TRUE	High	Master Protein	P21810	Biglycan OS=Homo sapiens OX=9606 GN=BGN PE=1 SV=2	33	BGN	3.18213e+09	6.48801e+08	3.59063e+09	4.52616e+08	1.74183e+08	4.51701e+08	4.77941e+08	9.90072e+08	2.96647e+08	1.01882e+09	8.76983e+08	6.09605e+08	1.01408e+10	1.57949e+10	1.20261e+09	3.23836e+08	2.30551e+09	9.15845e+09	1.13543e+10	6.65876e+09	6.97262e+08	4.10068e+08	8.09936e+08	1.57716e+08	8.6486e+09	7.51371e+08	3.00756e+09	5.12961e+09	2.48803e+08	3.23259e+09	6.21695e+08
TRUE	High	Master Protein	O15230	Laminin subunit alpha-5 OS=Homo sapiens OX=9606 GN=LAMA5 PE=1 SV=8	63	LAMA5	4.2428e+08	2.29091e+08	7.33562e+08	2.08179e+08	1.5346e+08	2.03909e+08	1.80707e+08	2.42317e+08	1.20571e+08	8.00425e+07	1.1922e+08	5.67057e+07	6.99393e+07	1.32149e+08	9.89757e+07	1.14243e+08	1.14318e+08	4.55897e+07	5.24102e+07	9.27518e+07	2.0215e+08	7.18127e+07	1.44391e+08	8.10432e+07	1.69079e+08	2.47534e+08	9.46937e+08	5.34624e+08	1.90156e+08	1.86702e+08	1.42219e+08
TRUE	High	Master Protein	Q14112	Nidogen-2 OS=Homo sapiens OX=9606 GN=NID2 PE=1 SV=3	46	NID2	5.41142e+08	3.65435e+08	4.83221e+08	4.32041e+08	2.23349e+08	4.60588e+08	3.4921e+08	3.07329e+08	2.58304e+08	3.53683e+08	2.70775e+08	2.58449e+08	6.3688e+08	2.04087e+08	3.45675e+08	1.95294e+08	6.37675e+08	1.70532e+08	1.11541e+08	1.16629e+08	5.19223e+08	3.33718e+08	5.96568e+08	2.78797e+08	1.39035e+08	1.95076e+08	1.80139e+08	2.49289e+08	2.38065e+08	5.45116e+08	2.17472e+08
TRUE	High	Master Protein	P01009	Alpha-1-antitrypsin OS=Homo sapiens OX=9606 GN=SERPINA1 PE=1 SV=3	10	SERPINA1	6.33522e+08	3.70669e+08	9.13635e+08	5.78529e+08	1.03844e+09	6.26927e+08	9.7583e+08	1.15605e+09	5.60523e+08	4.08618e+08	9.19624e+08	9.35328e+08	1.35078e+09	1.4326e+10	5.72768e+08	7.23363e+08	6.16688e+08	3.34947e+09	7.33556e+09	2.5179e+09	3.47709e+08	7.98825e+08	3.29417e+09	1.30306e+09	2.02586e+09	9.44802e+08	2.98248e+09	4.19704e+09	9.96689e+08	2.98841e+09	9.11919e+08
TRUE	High	Master Protein	P07996	Thrombospondin-1 OS=Homo sapiens OX=9606 GN=THBS1 PE=1 SV=2	49	THBS1	5.11227e+08	9.18198e+07	3.58361e+08	7.77279e+07	6.34369e+07	1.84598e+08	6.97041e+07	1.19341e+08	6.72771e+07	2.61789e+08	1.46182e+08	2.86226e+08	4.83432e+08	3.83116e+09	2.27321e+08	2.13073e+08	1.60689e+08	4.90202e+08	4.43015e+09	1.64296e+08	4.27669e+08	9.97835e+07	2.75849e+08	1.18189e+08	9.28032e+07	3.15452e+08	6.33183e+07	1.36192e+08	1.08432e+08	6.72002e+07	5.14785e+07
TRUE	High	Master Protein	P06576	ATP synthase subunit beta, mitochondrial OS=Homo sapiens OX=9606 GN=ATP5F1B PE=1 SV=3	30	ATP5B	2.11478e+09	1.61824e+09	5.49761e+08	1.54808e+09	8.67414e+08	1.92811e+09	6.58883e+08	8.69948e+08	5.81981e+08	1.18034e+09	7.11873e+08	5.95995e+08	8.25428e+08	4.32097e+08	9.40856e+08	1.2827e+09	6.85623e+08	5.05648e+08	3.65128e+08	3.86713e+08	1.06528e+09	1.298e+09	1.70195e+09	7.63635e+07	7.0977e+08	1.23526e+09	1.64429e+09	1.15678e+09	1.83134e+09	1.2132e+09	1.22605e+09
TRUE	High	Master Protein	P05091	Aldehyde dehydrogenase, mitochondrial OS=Homo sapiens OX=9606 GN=ALDH2 PE=1 SV=2	37	ALDH2	5.97399e+09	1.61031e+09	7.88683e+08	2.96922e+09	6.74376e+08	4.20569e+09	4.89179e+08	3.82196e+08	1.36552e+09	3.30139e+09	1.52723e+09	7.98591e+08	4.95327e+08	1.92646e+08	1.6784e+09	3.9692e+08	6.32224e+08	2.95247e+08	1.04569e+08	1.2108e+08	1.69135e+09	1.40961e+09	1.26635e+09	8.1308e+08	4.9229e+08	7.85824e+08	5.97265e+08	6.98291e+08	5.2227e+09	1.87857e+09	2.82808e+09
TRUE	High	Master Protein	P00450	Ceruloplasmin OS=Homo sapiens OX=9606 GN=CP PE=1 SV=1	43	CP	1.76675e+08	1.91321e+08	1.97893e+08	2.66512e+08	3.17971e+08	1.62003e+08	2.94405e+08	4.04408e+08	2.25505e+08	1.23285e+08	3.3e+08	3.87809e+08	1.97803e+08	1.14462e+09	1.46374e+08	1.54539e+08	4.63594e+08	7.06622e+08	6.33321e+08	7.25385e+08	1.21194e+08	1.57368e+08	1.18965e+09	2.94742e+07	8.5453e+07	7.93801e+07	2.05019e+08	1.56065e+08	3.72809e+07	1.66904e+08	3.92336e+07
TRUE	High	Master Protein	P10809	60 kDa heat shock protein, mitochondrial OS=Homo sapiens OX=9606 GN=HSPD1 PE=1 SV=2	41	HSPD1	1.115e+09	7.52872e+08	3.44466e+08	1.31952e+09	4.08279e+08	1.14771e+09	4.35152e+08	3.68407e+08	2.95979e+08	7.65143e+08	3.26072e+08	4.70575e+08	3.20088e+08	1.93479e+08	5.80293e+08	8.73901e+08	4.96852e+08	2.43721e+08	2.02666e+08	1.02062e+08	9.99219e+08	1.07096e+09	3.46439e+08	1.46879e+08	7.53017e+08	8.83287e+08	7.88057e+08	1.02739e+09	1.79047e+09	7.29059e+08	8.37264e+08
TRUE	High	Master Protein	P11216	Glycogen phosphorylase, brain form OS=Homo sapiens OX=9606 GN=PYGB PE=1 SV=5	38	PYGB	5.16582e+08	4.75337e+08	4.7146e+08	4.56031e+08	6.79843e+08	5.79861e+08	3.64326e+08	2.84741e+08	4.91494e+08	4.05781e+08	1.14912e+09	2.19562e+08	2.45371e+08	1.21694e+08	9.31968e+08	1.05861e+09	4.83337e+08	2.69432e+08	1.17301e+08	1.03849e+08	4.7126e+08	4.22029e+08	8.9502e+08	4.08968e+08	1.38871e+08	3.39242e+08	5.06092e+08	5.8512e+08	4.75567e+08	4.21056e+08	3.58114e+08
TRUE	High	Master Protein	P24821	Tenascin OS=Homo sapiens OX=9606 GN=TNC PE=1 SV=3	53	TNC	5.01061e+07	3.39189e+07	2.16982e+08	8.3258e+07	4.74053e+07	4.75001e+07	1.20367e+08	9.38074e+07	2.62205e+07	6.52964e+07	1.30498e+08	5.47887e+08	2.59096e+08	6.41146e+08	7.71979e+07	3.50591e+08	1.77398e+07	4.70665e+08	3.13347e+08	4.12238e+07	1.52788e+08	5.07631e+07	7.5004e+07	9.24405e+07	5.9556e+07	7.646e+07	7.24517e+07	7.67015e+07	6.66614e+07	4.90671e+07	1.82805e+08
TRUE	High	Master Protein	P11021	Endoplasmic reticulum chaperone BiP OS=Homo sapiens OX=9606 GN=HSPA5 PE=1 SV=2	39	HSPA5	2.29596e+09	1.79115e+09	9.93717e+08	2.76358e+09	1.67655e+09	2.32513e+09	1.15811e+09	1.56096e+09	1.92394e+09	2.50864e+09	1.51598e+09	1.51687e+09	1.20184e+09	1.23683e+09	1.905e+09	3.71279e+09	2.09992e+09	8.63649e+08	9.48531e+08	2.90374e+08	2.7721e+09	2.79281e+09	7.49962e+08	9.14855e+08	4.27051e+08	1.02489e+09	5.26293e+08	1.00707e+09	1.47055e+09	1.53673e+09	1.86983e+09
TRUE	High	Master Protein	P30101	Protein disulfide-isomerase A3 OS=Homo sapiens OX=9606 GN=PDIA3 PE=1 SV=4	31	PDIA3	1.3525e+09	9.92117e+08	7.53015e+08	2.47967e+09	8.43907e+08	1.76068e+09	9.9473e+08	1.06731e+09	1.13823e+09	2.3693e+09	1.07734e+09	1.26653e+09	1.04813e+09	7.17993e+08	1.24856e+09	4.27098e+09	8.97652e+08	5.10999e+08	3.19915e+08	2.21471e+08	1.53092e+09	1.29049e+09	6.72219e+08	7.33802e+08	3.2534e+08	5.28967e+08	2.51975e+08	8.04137e+08	9.02128e+08	8.25936e+08	1.83364e+09
TRUE	High	Master Protein	P16157	Ankyrin-1 OS=Homo sapiens OX=9606 GN=ANK1 PE=1 SV=3	46	ANK1	5.44362e+07	4.70605e+07	1.64647e+08	3.69006e+07	8.75152e+07	9.55688e+07	6.06062e+07	1.26362e+08	3.0986e+07	7.62089e+07	1.21744e+08	9.15382e+07	6.2255e+07	1.07337e+08	1.43865e+08	9.17444e+07	1.59967e+08	5.4169e+07	2.07062e+08	4.9676e+08	1.09719e+08	7.9704e+07	1.54352e+08	2.04817e+08	3.75344e+08	2.64411e+08	2.00298e+08	1.96146e+08	1.39997e+08	1.72207e+08	2.00249e+08
TRUE	High	Master Protein	P29401	Transketolase OS=Homo sapiens OX=9606 GN=TKT PE=1 SV=3	33	TKT	1.0087e+09	2.11984e+09	5.44695e+08	1.42818e+09	4.57924e+08	6.2263e+08	1.62777e+08	2.50238e+08	1.17471e+09	9.62696e+08	3.51894e+08	4.09572e+08	3.20734e+08	1.89923e+08	7.70428e+08	3.82038e+08	7.1458e+08	2.71525e+08	8.55419e+07	1.08489e+08	9.04268e+08	1.08448e+09	6.18239e+08	4.1462e+08	1.74573e+08	2.2826e+08	4.15111e+08	2.74366e+08	8.2223e+08	5.13442e+08	1.09308e+09
TRUE	High	Master Protein	Q16555	Dihydropyrimidinase-related protein 2 OS=Homo sapiens OX=9606 GN=DPYSL2 PE=1 SV=1	2	DPYSL2	161809	109262	11291.8	41747.5	119403	151900	189834	128640	63965.8	189908	147560	94709.9	59153.2	1.84697e+06	21695.7	7583.57	29605.8	194487	50731.4	2.30239e+06	6560.65	15761.8	254978	68945.8	284312	377020	6.77349e+06	600491	83490.4	189492	42325.2
TRUE	High	Master Protein	P68032	Actin, alpha cardiac muscle 1 OS=Homo sapiens OX=9606 GN=ACTC1 PE=1 SV=1	2	ACTC1	1.74532e+09	1.01012e+09	6.35677e+08	9.89691e+08	3.86932e+08	7.92437e+08	5.82259e+08	6.28122e+08	6.42306e+08	7.53334e+08	1.35413e+08	2.75191e+08	2.43242e+09	1.8777e+09	1.13651e+09	3.82908e+08	1.78894e+09	1.21361e+09	5.94883e+08	3.36373e+08	5.35331e+08	8.63436e+08	1.56508e+08	2.40687e+07	2.13761e+08	1.93135e+09	2.5946e+09	3.80633e+09	3.70561e+08	2.99255e+08	2.20998e+08
TRUE	High	Master Protein	Q71U36	Tubulin alpha-1A chain OS=Homo sapiens OX=9606 GN=TUBA1A PE=1 SV=1	1	TUBA1A	3.16645e+09	2.23953e+09	1.96437e+09	4.04181e+09	3.23763e+09	5.94825e+09	2.00738e+09	2.10564e+09	2.54093e+09	4.90318e+09	2.91192e+09	8.39817e+08	2.4621e+09	8.26206e+08	2.51572e+09	4.54514e+09	1.70322e+09	1.71483e+09	7.06006e+08	4.0076e+08	3.67147e+09	2.94119e+09	1.77261e+09	1.15426e+09	7.4091e+08	2.81205e+09	4.40716e+09	1.95635e+09	2.11772e+09	2.1232e+09	2.81143e+09
TRUE	High	Master Protein	P02671	Fibrinogen alpha chain OS=Homo sapiens OX=9606 GN=FGA PE=1 SV=2	41	FGA	1.16334e+09	2.23159e+08	1.61929e+09	1.51303e+08	1.58811e+09	4.00805e+08	5.68468e+08	1.02119e+09	2.81766e+08	6.37135e+08	1.77054e+09	2.21974e+09	4.7702e+08	1.12149e+09	6.57037e+09	5.14737e+08	3.19838e+09	1.39998e+09	9.37715e+08	1.06209e+09	2.12688e+08	9.00717e+08	5.94055e+08	2.09101e+08	1.26626e+09	1.84628e+09	3.166e+09	3.73685e+09	2.84629e+09	1.56329e+09	4.69528e+08
TRUE	High	Master Protein	Q6ZMP0	Thrombospondin type-1 domain-containing protein 4 OS=Homo sapiens OX=9606 GN=THSD4 PE=2 SV=2	41	THSD4	6.40123e+08	8.21128e+07	1.0172e+08	3.31948e+08	3.64708e+07	7.18897e+08	7.12917e+07	8.68079e+07	4.14152e+08	2.2063e+09	3.66167e+08	1.4703e+08	2.12421e+08	7.04897e+07	3.64013e+08	5.50632e+07	2.05344e+08	9.40754e+07	4.76868e+07	3.97503e+07	8.71715e+08	7.68152e+08	2.76419e+08	6.22516e+07	8.94365e+07	1.31972e+08	1.45051e+08	1.00184e+08	1.43991e+08	5.20268e+08	1.12176e+09
TRUE	High	Master Protein	A0A0G2JPR0	Complement C4-A OS=Homo sapiens OX=9606 GN=C4A PE=1 SV=1	12	LOC100294156	9.14602e+06	4.21908e+07	4.19638e+07	1.53574e+07	1.14005e+07	1.999e+07	5.74651e+07	6.15851e+07	2.45534e+07	1.92838e+07	2.42811e+07	1.16245e+08	8.17411e+07	1.52375e+08	5.73777e+07	2.41088e+07	2.18982e+07	4.57673e+07	9.59557e+07	2.92335e+07	2.6093e+06	4.67132e+07	4.46697e+08	7.09181e+07	7.61927e+07	3.35367e+07	1.98896e+08	6.43826e+07	6.93343e+07	1.405e+07	2.94321e+07
TRUE	High	Master Protein	Q13509	Tubulin beta-3 chain OS=Homo sapiens OX=9606 GN=TUBB3 PE=1 SV=2	9	TUBB3	2.17981e+08	5.60214e+07	3.99192e+07	4.19052e+07	1.10812e+08	9.70102e+07	6.00919e+07	4.3051e+07	4.56383e+07	6.14467e+07	9.09937e+07	2.06752e+07	2.7777e+07	1.15145e+07	2.74055e+07	1.2435e+08	6.07902e+07	3.83782e+07	1.41306e+07	2.08297e+07	2.7239e+07	5.94099e+07	7.264e+06	4.69508e+07	2.05522e+07	9.83143e+07	3.49471e+08	5.34233e+07	4.39215e+07	4.30535e+07	7.67312e+07
TRUE	High	Master Protein	P00558	Phosphoglycerate kinase 1 OS=Homo sapiens OX=9606 GN=PGK1 PE=1 SV=3	37	PGK1	2.03694e+09	1.49938e+09	1.27111e+09	2.00679e+09	1.27126e+09	1.46814e+09	1.57601e+09	1.2165e+09	1.30993e+09	1.64627e+09	1.28561e+09	9.70788e+08	1.14124e+09	5.52767e+08	1.87806e+09	1.23179e+09	7.82198e+08	6.49389e+08	4.48315e+08	3.8925e+08	9.60935e+08	1.48359e+09	2.91904e+09	9.70179e+08	6.46678e+08	5.8787e+08	1.00198e+09	9.44767e+08	1.94425e+09	1.79353e+09	1.93296e+09
TRUE	High	Master Protein	P06733	Alpha-enolase OS=Homo sapiens OX=9606 GN=ENO1 PE=1 SV=2	29	ENO1	1.67756e+09	1.7214e+09	1.84757e+09	1.83699e+09	1.76209e+09	1.61092e+09	1.3979e+09	1.15733e+09	2.02913e+09	2.44613e+09	1.6811e+09	1.28329e+09	1.25044e+09	2.04503e+09	1.14771e+09	1.22136e+09	1.34564e+09	8.56577e+08	1.95592e+09	9.1856e+08	9.62089e+08	1.86214e+09	6.6739e+08	4.80921e+08	4.15514e+08	6.90013e+08	1.00537e+09	9.40159e+08	5.69453e+08	8.745e+08	1.72157e+09
TRUE	High	Master Protein	P05023	Sodium/potassium-transporting ATPase subunit alpha-1 OS=Homo sapiens OX=9606 GN=ATP1A1 PE=1 SV=1	29	ATP1A1	1.83684e+09	1.06841e+09	5.42701e+08	1.38684e+09	6.55001e+08	1.23255e+09	2.32141e+08	1.99043e+08	1.19927e+09	1.50321e+09	1.04536e+09	4.49718e+08	9.52676e+08	1.18087e+08	1.09028e+09	1.33342e+09	2.83623e+08	5.70129e+08	1.16681e+08	8.14658e+07	1.27852e+09	8.78169e+08	8.05731e+08	3.35147e+08	3.52989e+08	1.24135e+09	2.71603e+09	8.91354e+08	1.52919e+09	6.69523e+08	7.96225e+08
TRUE	High	Master Protein	Q9BQE3	Tubulin alpha-1C chain OS=Homo sapiens OX=9606 GN=TUBA1C PE=1 SV=1	2	TUBA1C	3.44563e+08	3.10435e+08	6.48417e+08	7.40016e+08	2.81407e+08	7.5293e+08	2.88017e+08	1.98177e+08	4.4317e+08	5.58251e+08	4.64393e+08	4.23306e+07	1.40741e+08	9.47534e+07	3.06812e+08	3.33553e+08	7.66006e+07	1.53392e+08	2.7468e+06	2.66873e+07	9.37405e+07	7.64988e+08	8.75653e+06	161257	8.64831e+07	1.6584e+08	9.04197e+07	1.66709e+08	1.62399e+08	8.00933e+07	2.27773e+08
TRUE	High	Master Protein	P00747	Plasminogen OS=Homo sapiens OX=9606 GN=PLG PE=1 SV=2	41	PLG	9.74678e+07	9.10234e+07	4.67533e+08	8.99554e+07	1.27711e+08	2.03446e+08	1.30496e+08	2.13126e+08	1.50721e+08	1.12409e+08	3.20788e+08	1.8225e+08	1.6784e+08	2.78448e+08	2.35405e+08	1.23777e+08	1.81807e+08	3.69569e+08	1.30295e+08	3.72582e+08	1.64791e+08	9.13444e+07	2.68493e+08	8.5555e+07	1.37676e+08	9.35081e+07	1.56845e+08	8.10187e+07	6.49259e+07	1.25022e+08	1.00858e+08
TRUE	High	Master Protein	P53621	Coatomer subunit alpha OS=Homo sapiens OX=9606 GN=COPA PE=1 SV=2	50	COPA	3.55583e+08	3.6033e+08	1.68303e+08	4.80694e+08	1.82825e+08	3.13573e+08	2.32569e+08	1.80667e+08	3.22191e+08	3.76461e+08	2.71859e+08	2.93426e+08	2.34278e+08	7.66316e+07	4.24935e+08	4.94617e+08	1.6381e+08	1.2563e+08	6.89432e+07	3.3544e+07	4.925e+08	3.52851e+08	2.10706e+08	1.31629e+08	8.68147e+07	1.88801e+08	7.92285e+07	1.34392e+08	3.62322e+08	2.41574e+08	3.74785e+08
TRUE	High	Master Protein	P62736	Actin, aortic smooth muscle OS=Homo sapiens OX=9606 GN=ACTA2 PE=1 SV=1	1	ACTA2	5.22739e+07	6.45744e+07	7.9158e+07	8.03108e+07	5.66194e+07	4.31797e+07	1.05176e+08	6.91835e+07	5.14809e+07	5.5452e+07	3.92062e+07	3.62405e+07	9.74818e+08	6.10579e+08	5.48352e+07	6.81784e+07	2.12071e+07	1.45105e+08	7.1102e+07	7.11912e+07	2.49613e+06	1.4998e+08	8.27675e+07	96591.1	6.66211e+07	4.16966e+07	2.15917e+08	1.10136e+08	3.2122e+08	3.96971e+08	1.03616e+07
TRUE	High	Master Protein	Q9P2E9	Ribosome-binding protein 1 OS=Homo sapiens OX=9606 GN=RRBP1 PE=1 SV=5	43		4.27688e+08	3.51982e+08	1.80475e+08	5.70748e+08	1.45689e+08	6.62338e+08	2.91614e+08	1.92593e+08	4.20603e+08	6.99707e+08	2.94694e+08	3.05586e+08	1.49534e+08	1.42923e+08	2.25304e+08	4.23692e+08	2.02028e+08	1.87128e+08	8.12509e+07	5.70021e+07	7.05403e+08	5.62903e+08	1.10849e+08	6.80818e+07	6.50313e+07	4.6721e+07	4.47708e+07	7.85774e+07	1.96995e+08	3.07934e+08	3.02042e+08
TRUE	High	Master Protein	P09493	Tropomyosin alpha-1 chain OS=Homo sapiens OX=9606 GN=TPM1 PE=1 SV=2	4	TPM1	9.55458e+07	9.01826e+07	2.34193e+07	3.48262e+07	6.27695e+07	9.40017e+07	5.42347e+07	5.13888e+07	5.26916e+07	1.08443e+08	8.51618e+06	2.57771e+07	9.96144e+07	9.98595e+07	3.65279e+07	2.15539e+07	1.43939e+08	6.11618e+07	7.37226e+07	1.11842e+07	5.30356e+07	9.8081e+07	4.73776e+07	2.26031e+07	2.08025e+07	5.93136e+07	3.63602e+07	1.04337e+08	6.88531e+07	5.98184e+07	1.47578e+07
TRUE	High	Master Protein	Q99798	Aconitate hydratase, mitochondrial OS=Homo sapiens OX=9606 GN=ACO2 PE=1 SV=2	39	ACO2	4.77647e+08	6.64179e+08	5.028e+08	6.74073e+08	3.32873e+08	5.1633e+08	4.10834e+08	4.25654e+08	3.78515e+08	4.3466e+08	3.75568e+08	2.22983e+08	2.25407e+08	1.16275e+08	2.82055e+08	6.08668e+08	2.52622e+08	1.56139e+08	6.23821e+07	6.981e+07	5.16932e+08	4.40686e+08	2.32375e+08	1.3802e+08	7.32747e+08	5.36379e+08	1.01748e+09	5.45149e+08	4.15507e+08	1.78438e+08	3.39062e+08
TRUE	High	Master Protein	P55268	Laminin subunit beta-2 OS=Homo sapiens OX=9606 GN=LAMB2 PE=1 SV=2	49	LAMB2	3.23514e+08	1.7954e+08	2.92351e+08	2.98966e+08	1.5356e+08	2.83824e+08	2.0616e+08	2.67188e+08	1.62157e+08	1.77874e+08	2.04799e+08	1.82955e+08	2.05025e+08	7.55612e+07	2.0245e+08	1.71933e+08	2.56465e+08	1.15082e+08	6.00092e+07	1.66523e+08	2.25123e+08	5.53092e+08	2.90186e+08	3.21312e+08	1.36341e+08	2.69076e+08	6.52513e+08	3.50161e+08	1.53204e+08	2.46834e+08	1.9136e+08
TRUE	High	Master Protein	P04075	Fructose-bisphosphate aldolase A OS=Homo sapiens OX=9606 GN=ALDOA PE=1 SV=2	26	ALDOA	1.68516e+09	1.21497e+09	6.84087e+08	1.76873e+09	8.17408e+08	1.52319e+09	1.34914e+09	1.87923e+09	9.25436e+08	2.50181e+09	1.26589e+09	7.76094e+08	1.02647e+09	3.92982e+08	2.10649e+09	5.9943e+08	7.13564e+08	7.25123e+08	2.39213e+08	2.24389e+08	1.54721e+09	1.39754e+09	9.0473e+08	1.52773e+09	5.04418e+08	5.16644e+08	9.71584e+08	5.14502e+08	1.25421e+09	1.38989e+09	3.52214e+09
TRUE	High	Master Protein	P35221	Catenin alpha-1 OS=Homo sapiens OX=9606 GN=CTNNA1 PE=1 SV=1	36	CTNNA1	6.42441e+08	6.58164e+08	2.54304e+08	6.06426e+08	5.17955e+08	4.12571e+08	2.09837e+08	3.13733e+08	4.09631e+08	4.09063e+08	4.25683e+08	8.37835e+07	4.87502e+08	5.17789e+07	2.15465e+08	1.51885e+08	1.61011e+08	3.07833e+08	3.94129e+07	4.48119e+07	6.67596e+08	3.46955e+08	3.58394e+08	5.54153e+07	6.57888e+07	1.47813e+08	1.07755e+08	8.50316e+07	2.07947e+08	7.72282e+07	1.02694e+08
TRUE	High	Master Protein	P02679	Fibrinogen gamma chain OS=Homo sapiens OX=9606 GN=FGG PE=1 SV=3	31	FGG	1.95928e+09	5.1249e+08	2.83154e+09	7.42698e+07	1.74351e+09	6.75949e+08	1.07612e+09	1.62697e+09	2.69429e+08	9.23972e+08	3.67127e+09	3.08949e+09	5.5921e+08	2.94481e+09	1.08134e+10	9.52587e+08	3.5662e+09	2.9646e+09	2.39356e+09	3.1691e+09	2.31799e+08	9.7329e+08	7.95716e+08	5.07437e+08	1.87832e+09	1.31006e+09	1.01247e+09	3.01427e+09	4.68261e+09	3.9869e+09	1.10402e+09
TRUE	High	Master Protein	Q14764	Major vault protein OS=Homo sapiens OX=9606 GN=MVP PE=1 SV=4	43	MVP	4.54236e+08	4.89277e+08	1.08136e+09	2.68395e+08	2.04949e+08	2.97252e+08	2.38165e+08	2.54214e+08	3.82732e+08	3.93431e+08	4.20367e+08	1.94969e+08	3.22575e+08	6.93635e+07	2.4677e+08	1.54666e+08	1.32023e+08	1.51069e+08	4.7957e+07	1.02693e+09	1.61206e+08	2.69939e+08	2.47643e+08	7.42802e+08	1.66222e+08	2.0814e+08	1.45061e+08	2.2363e+08	5.54119e+08	2.59413e+08	1.92235e+08
TRUE	High	Master Protein	Q7Z6Z7	E3 ubiquitin-protein ligase HUWE1 OS=Homo sapiens OX=9606 GN=HUWE1 PE=1 SV=3	56	HUWE1	1.19728e+08	1.69295e+08	8.61992e+07	1.96686e+08	8.37683e+07	1.82919e+08	9.96003e+07	7.09538e+07	1.28655e+08	1.55448e+08	9.3478e+07	2.86508e+07	5.24374e+07	2.62178e+07	3.88635e+07	7.37304e+07	8.21461e+07	1.98888e+07	2.97858e+07	1.78922e+07	1.08535e+08	1.47964e+08	7.38588e+07	7.40886e+07	3.74019e+07	4.22208e+07	4.89848e+07	4.2951e+07	1.16944e+08	5.31117e+07	1.27616e+08
TRUE	High	Master Protein	P02647	Apolipoprotein A-I OS=Homo sapiens OX=9606 GN=APOA1 PE=1 SV=1	38	APOA1	8.17681e+08	5.97559e+08	1.44521e+09	1.20855e+09	1.34111e+09	1.94108e+09	1.1647e+09	1.03291e+09	9.56409e+08	1.50478e+09	1.66026e+09	7.86727e+08	1.26094e+09	6.16973e+09	6.64579e+08	1.00864e+09	1.45454e+09	3.64564e+09	3.28984e+09	2.86785e+09	4.5651e+08	9.13022e+08	2.78409e+09	2.86727e+09	2.11082e+09	1.25836e+09	9.83511e+08	6.87395e+08	3.54249e+08	2.6325e+09	1.41353e+09
TRUE	High	Master Protein	P20774	Mimecan OS=Homo sapiens OX=9606 GN=OGN PE=1 SV=1	29	OGN	4.85316e+09	1.13445e+09	5.02915e+09	7.01254e+08	2.19861e+08	5.31477e+08	7.43527e+08	1.57653e+09	4.71313e+08	1.63415e+09	1.14692e+09	5.45835e+08	1.53492e+10	1.71099e+10	1.93252e+09	3.92299e+08	1.9845e+09	9.80279e+09	5.91466e+09	1.24267e+10	2.30632e+09	4.31125e+08	1.69096e+09	5.90994e+08	4.25972e+09	1.76474e+09	1.23871e+09	2.75148e+09	2.93225e+08	7.76215e+09	1.32269e+09
TRUE	High	Master Protein	P42704	Leucine-rich PPR motif-containing protein, mitochondrial OS=Homo sapiens OX=9606 GN=LRPPRC PE=1 SV=3	49	LRPPRC	2.31251e+08	2.08189e+08	1.43431e+08	2.80933e+08	1.51801e+08	1.8962e+08	1.0451e+08	6.18049e+08	1.15045e+08	1.73869e+08	3.4434e+08	1.32952e+08	5.24157e+07	9.45204e+07	1.9785e+08	2.42611e+08	1.0801e+08	7.69804e+07	8.36247e+07	5.92817e+07	1.78657e+08	1.36034e+08	2.21199e+08	1.1905e+08	4.10044e+08	4.03444e+08	3.85333e+08	2.32298e+08	4.74786e+08	2.04986e+08	1.94865e+08
TRUE	High	Master Protein	P07099	Epoxide hydrolase 1 OS=Homo sapiens OX=9606 GN=EPHX1 PE=1 SV=1	35	EPHX1	1.51738e+09	9.40429e+08	4.31912e+08	1.1209e+09	7.96904e+08	2.26169e+09	5.85559e+08	6.24615e+08	6.27936e+08	4.30769e+08	4.73969e+08	3.77592e+08	4.27124e+08	1.23421e+08	8.13936e+08	1.33854e+08	3.99033e+08	2.60924e+08	8.36959e+07	7.0741e+07	8.28297e+08	5.87684e+08	1.93467e+09	7.83852e+08	2.64866e+09	3.00273e+09	2.88334e+09	2.41596e+09	3.06942e+09	1.69576e+09	2.15001e+09
TRUE	High	Master Protein	Q08211	ATP-dependent RNA helicase A OS=Homo sapiens OX=9606 GN=DHX9 PE=1 SV=4	42	DHX9	3.98101e+08	3.69498e+08	1.19546e+08	4.90798e+08	2.5231e+08	3.48736e+08	3.86673e+08	1.98967e+08	2.54804e+08	4.02531e+08	2.0465e+08	3.88445e+08	1.83574e+08	8.54913e+07	2.67176e+08	3.63898e+08	2.07553e+08	1.06276e+08	1.06965e+08	4.58462e+07	6.16031e+08	2.84053e+08	1.08465e+08	3.25397e+07	6.43159e+07	1.9804e+08	1.3031e+08	2.47807e+08	3.13656e+08	1.90191e+08	2.899e+08
TRUE	High	Master Protein	P50395	Rab GDP dissociation inhibitor beta OS=Homo sapiens OX=9606 GN=GDI2 PE=1 SV=2	24	GDI2	6.8954e+08	7.22291e+08	5.11058e+08	5.88723e+08	5.57301e+08	5.2932e+08	3.86188e+08	3.27932e+08	7.61486e+08	5.05033e+08	6.496e+08	3.16004e+08	3.64405e+08	2.16601e+08	2.68052e+08	5.72311e+08	4.07863e+08	2.69931e+08	1.90226e+08	1.32601e+08	3.92303e+08	5.45644e+08	3.35691e+08	1.19724e+08	1.84463e+08	2.45568e+08	4.70882e+08	2.07864e+08	5.91043e+08	2.481e+08	6.97471e+08
TRUE	High	Master Protein	Q92616	eIF-2-alpha kinase activator GCN1 OS=Homo sapiens OX=9606 GN=GCN1 PE=1 SV=6	59	GCN1L1; GCN1	8.34755e+07	1.24989e+08	1.22491e+08	1.10536e+08	7.71125e+07	1.0133e+08	3.21528e+08	1.83479e+08	6.00552e+07	7.48484e+07	1.36138e+08	1.64547e+07	2.56628e+07	1.44886e+07	6.17632e+07	5.83674e+07	4.20832e+07	3.30196e+07	2.42631e+07	9.78471e+06	1.26887e+08	1.03703e+08	5.5423e+07	3.30012e+07	4.11658e+07	5.97504e+07	7.07455e+07	7.23906e+07	1.49946e+08	5.30424e+07	9.27026e+07
TRUE	High	Master Protein	Q14195	Dihydropyrimidinase-related protein 3 OS=Homo sapiens OX=9606 GN=DPYSL3 PE=1 SV=1	24	DPYSL3	1.12693e+09	4.13155e+08	2.24132e+08	3.13083e+08	3.40235e+08	7.63096e+08	9.976e+07	1.57715e+08	4.33408e+08	8.53927e+08	4.45079e+08	1.76246e+08	4.49711e+08	1.93246e+08	6.51077e+08	1.91787e+08	3.00012e+08	3.08315e+08	9.36811e+07	9.93261e+07	8.49778e+08	4.65674e+08	8.80889e+08	1.17341e+08	1.30051e+08	3.50878e+08	3.16012e+08	1.92744e+08	6.71414e+08	3.40203e+08	5.5809e+08
TRUE	High	Master Protein	Q99959	Plakophilin-2 OS=Homo sapiens OX=9606 GN=PKP2 PE=1 SV=2	32	PKP2	2.3664e+08	4.13195e+08	1.9458e+08	2.27063e+08	7.17047e+07	8.51207e+07	3.22423e+08	5.47285e+08	3.17406e+08	2.29548e+08	1.28054e+08	2.67623e+08	1.26867e+08	2.9008e+07	1.7406e+08	7.00502e+07	1.93228e+08	7.14503e+07	1.79534e+07	1.91419e+07	1.18187e+08	1.26684e+08	3.15911e+08	1.01402e+08	2.07452e+08	2.23627e+08	6.92583e+07	2.81285e+08	1.86438e+08	5.02624e+07	1.22352e+08
TRUE	High	Master Protein	O00468	Agrin OS=Homo sapiens OX=9606 GN=AGRN PE=1 SV=5	46	AGRN	2.39203e+08	1.08744e+08	1.28591e+08	1.12516e+08	7.77947e+07	1.91592e+08	1.3758e+08	1.80666e+08	8.67616e+07	1.04978e+08	1.54136e+08	6.93004e+07	1.35991e+08	4.31809e+07	2.27732e+08	2.12645e+08	1.31652e+08	5.23988e+07	3.83984e+07	3.09193e+07	1.27734e+08	2.24131e+08	1.56763e+09	1.36184e+08	8.36064e+07	1.6376e+08	1.67865e+08	1.82443e+08	9.88383e+07	2.09376e+08	1.27868e+08
TRUE	High	Master Protein	Q86UP2	Kinectin OS=Homo sapiens OX=9606 GN=KTN1 PE=1 SV=1	45	KTN1	2.99311e+08	2.8797e+08	9.64898e+07	3.06944e+08	1.97873e+08	3.66896e+08	1.00821e+08	1.57387e+08	1.96201e+08	2.48896e+08	2.16823e+08	7.62324e+07	1.07326e+08	2.89077e+07	1.29232e+08	1.00858e+08	1.99191e+08	8.00195e+07	4.13131e+07	3.18685e+07	2.31205e+08	2.72638e+08	1.3884e+08	5.84213e+07	9.63327e+07	1.11513e+08	1.05525e+08	1.07021e+08	4.0252e+08	2.05802e+08	2.49437e+08
TRUE	High	Master Protein	Q9BUF5	Tubulin beta-6 chain OS=Homo sapiens OX=9606 GN=TUBB6 PE=1 SV=1	12	TUBB6	1.2515e+08	2.53393e+08	9.12697e+07	1.8077e+08	8.36601e+07	2.52562e+08	2.10959e+08	8.22084e+07	8.93083e+07	2.22981e+08	1.75297e+08	6.65041e+07	5.73564e+07	3.06687e+07	3.2555e+07	2.67321e+08	2.29944e+08	1.16669e+08	1.27019e+08	1.56957e+08	3.40506e+08	1.13961e+08	5.70117e+07	9.56134e+06	1.59293e+06	5.76192e+06	2.66509e+06	8.91804e+06	6.20766e+06	1.78397e+07	1.41049e+07
TRUE	High	Master Protein	P21980	Protein-glutamine gamma-glutamyltransferase 2 OS=Homo sapiens OX=9606 GN=TGM2 PE=1 SV=2	35	TGM2	4.47933e+08	9.12732e+07	7.96609e+08	2.07519e+08	1.7213e+08	2.46428e+09	2.06468e+08	2.08009e+08	3.49231e+08	5.55563e+08	3.17458e+08	1.09124e+08	3.06322e+08	4.50569e+08	5.11966e+08	1.60564e+08	2.99532e+08	1.11054e+08	1.92591e+08	1.40387e+08	5.07716e+08	8.0335e+07	1.77063e+08	6.73324e+07	1.92267e+08	3.68943e+08	4.65519e+08	4.20056e+08	1.53093e+08	7.29085e+08	2.39156e+08
TRUE	High	Master Protein	Q9NZM1	Myoferlin OS=Homo sapiens OX=9606 GN=MYOF PE=1 SV=1	52	MYOF	6.3279e+07	4.47246e+07	3.93594e+07	8.11029e+07	1.11662e+08	1.01014e+08	2.16025e+08	1.50365e+08	2.22692e+08	6.34538e+07	2.55431e+08	1.56599e+08	1.0364e+08	8.3212e+08	1.13462e+08	1.76808e+08	6.45813e+08	5.89438e+07	2.87209e+09	2.53402e+09	2.12275e+08	7.1273e+08	1.64251e+08	9.5598e+07	6.02493e+08	3.32406e+08	3.06665e+08	3.59326e+08	1.96294e+08	1.40482e+08	5.77228e+07
TRUE	High	Master Protein	P67936	Tropomyosin alpha-4 chain OS=Homo sapiens OX=9606 GN=TPM4 PE=1 SV=3	14	TPM4	9.83753e+08	1.44653e+09	8.38578e+07	1.07975e+09	7.27563e+08	1.35377e+09	1.91357e+09	8.0587e+08	1.90416e+09	1.57554e+09	5.60305e+08	7.40137e+08	1.72424e+09	9.43634e+08	5.61952e+08	3.93755e+08	5.75943e+08	5.54928e+08	3.52821e+08	1.37446e+08	1.06123e+09	1.63641e+09	5.78026e+08	6.45693e+08	3.43873e+08	9.28897e+08	1.38666e+09	2.01452e+09	5.8668e+08	1.56181e+09	9.11509e+08
TRUE	High	Master Protein	P27824	Calnexin OS=Homo sapiens OX=9606 GN=CANX PE=1 SV=2	32	CANX	5.39565e+08	7.21052e+08	2.64696e+08	1.27989e+09	6.78695e+08	1.0326e+09	1.21348e+09	1.15824e+09	7.0099e+08	1.2382e+09	6.25884e+08	7.8208e+08	5.75768e+08	2.65717e+08	6.82038e+08	2.10389e+09	7.69957e+08	3.82664e+08	2.44146e+08	1.15618e+08	1.09853e+09	1.05456e+09	8.0054e+08	3.57222e+08	2.09914e+08	4.61182e+08	1.81573e+08	3.47089e+08	3.81286e+08	3.05106e+08	3.6582e+08
TRUE	High	Master Protein	P0DOX5	Immunoglobulin gamma-1 heavy chain OS=Homo sapiens OX=9606 PE=1 SV=1	11		2.32266e+09	1.54459e+09	3.03826e+09	3.47855e+09	2.41236e+09	1.816e+09	3.1372e+09	4.47994e+09	2.3526e+09	1.58634e+09	2.68387e+09	4.88784e+09	7.41337e+09	1.16114e+10	2.13815e+09	2.39697e+09	2.35942e+09	9.49522e+09	1.06712e+10	4.78609e+09	2.59325e+09	1.94104e+09	3.87818e+09	5.83104e+09	7.92389e+09	2.49191e+09	5.91643e+09	4.23253e+09	2.68811e+09	4.46497e+09	3.28122e+09
TRUE	High	Master Protein	P68104	Elongation factor 1-alpha 1 OS=Homo sapiens OX=9606 GN=EEF1A1 PE=1 SV=1	16	EEF1A1	2.67144e+09	3.64849e+09	2.27579e+09	5.03904e+09	1.79679e+09	2.66314e+09	2.05521e+09	1.51255e+09	3.23026e+09	3.66764e+09	2.00882e+09	9.14122e+08	2.29944e+09	7.0612e+08	1.98169e+09	2.39801e+09	1.03826e+09	9.44711e+08	3.94466e+08	2.49856e+08	3.94304e+09	3.32329e+09	7.72051e+08	6.77337e+08	5.26772e+08	1.52144e+09	9.1205e+08	1.62482e+09	3.66262e+09	2.57474e+09	5.9603e+09
TRUE	High	Master Protein	Q13228	Methanethiol oxidase OS=Homo sapiens OX=9606 GN=SELENBP1 PE=1 SV=2	35	SELENBP1	2.17432e+08	7.83143e+08	3.45687e+08	7.80396e+08	4.47303e+08	4.22453e+08	2.62554e+08	1.58425e+08	1.04286e+09	8.2604e+08	5.41472e+08	3.92136e+08	2.84914e+08	1.43425e+08	6.08309e+08	2.24224e+08	3.40346e+08	2.45679e+08	2.18567e+08	2.19437e+08	4.78135e+08	5.59095e+08	3.24786e+08	1.77645e+08	2.13392e+09	1.25104e+09	8.21882e+08	7.825e+08	1.4312e+09	7.24725e+08	1.12309e+09
TRUE	High	Master Protein	P13010	X-ray repair cross-complementing protein 5 OS=Homo sapiens OX=9606 GN=XRCC5 PE=1 SV=3	38	XRCC5	3.32265e+08	3.74998e+08	1.93173e+08	4.02946e+08	2.66997e+08	1.91254e+08	1.96804e+08	1.73526e+08	2.5687e+08	2.88492e+08	2.19769e+08	1.66976e+08	1.47484e+08	1.0107e+08	1.94472e+08	3.34506e+08	3.16209e+08	1.06697e+08	5.59682e+07	5.17084e+07	4.39101e+08	3.94909e+08	2.62441e+08	6.7467e+07	9.81928e+07	2.20597e+08	1.88885e+08	1.51067e+08	4.00019e+08	1.93245e+08	2.53333e+08
TRUE	High	Master Protein	Q86VP6	Cullin-associated NEDD8-dissociated protein 1 OS=Homo sapiens OX=9606 GN=CAND1 PE=1 SV=2	42	CAND1	3.47331e+08	4.86653e+08	3.00744e+08	4.97815e+08	3.42009e+08	4.01094e+08	2.03986e+08	2.94975e+08	4.0174e+08	3.17538e+08	3.84515e+08	1.47758e+08	1.92814e+08	5.93987e+07	2.2911e+08	3.46468e+08	2.5783e+08	1.2599e+08	6.10785e+07	7.82361e+07	3.39759e+08	4.15881e+08	1.69376e+08	7.65699e+07	7.65895e+07	1.63288e+08	3.31048e+08	1.62465e+08	4.24936e+08	1.32964e+08	3.1151e+08
TRUE	High	Master Protein	P11047	Laminin subunit gamma-1 OS=Homo sapiens OX=9606 GN=LAMC1 PE=1 SV=3	42	LAMC1	3.19655e+08	1.52703e+08	2.17985e+08	2.0189e+08	9.59858e+07	2.33662e+08	1.64696e+08	1.61275e+08	7.92813e+07	1.66724e+08	1.31007e+08	1.0827e+09	2.28938e+08	7.3333e+07	1.49844e+08	1.83524e+08	3.47207e+08	1.23258e+08	8.02137e+07	5.90943e+07	3.41059e+08	1.39112e+08	2.24628e+08	1.52335e+08	1.22951e+08	1.8575e+08	2.40812e+08	1.6106e+08	1.2048e+08	1.9172e+08	1.89851e+08
TRUE	High	Master Protein	P15144	Aminopeptidase N OS=Homo sapiens OX=9606 GN=ANPEP PE=1 SV=4	41	ANPEP	1.25695e+09	1.77322e+08	7.25264e+07	2.34773e+08	4.27169e+08	1.25768e+08	7.71957e+07	9.92008e+07	3.12168e+08	1.7064e+08	2.35125e+08	1.15991e+08	6.34595e+07	4.58694e+07	2.09641e+08	8.21173e+07	1.4371e+08	8.82109e+07	8.22546e+07	1.52982e+07	1.26829e+08	1.36666e+08	2.46371e+08	2.18974e+08	3.45356e+07	4.72742e+07	3.52706e+07	7.36322e+07	8.87202e+07	9.27407e+07	1.98322e+08
TRUE	High	Master Protein	P04040	Catalase OS=Homo sapiens OX=9606 GN=CAT PE=1 SV=3	34	CAT	4.37584e+08	3.76494e+08	3.62818e+08	3.21472e+08	4.27221e+08	2.95917e+08	2.45251e+08	1.99257e+08	2.73116e+08	2.99386e+08	4.68811e+08	6.82815e+08	1.29939e+08	1.24335e+08	4.53001e+08	2.93821e+08	3.41959e+08	2.42859e+08	2.41899e+08	7.2444e+08	3.16478e+08	2.00657e+08	2.22008e+08	1.07796e+08	1.0318e+09	4.43054e+08	3.8506e+08	3.97991e+08	5.02463e+08	2.73168e+08	2.64994e+08
TRUE	High	Master Protein	Q07065	Cytoskeleton-associated protein 4 OS=Homo sapiens OX=9606 GN=CKAP4 PE=1 SV=2	32	CKAP4	4.50874e+08	4.71816e+08	2.6454e+08	8.82879e+08	2.18731e+08	1.45589e+09	3.8026e+08	3.38799e+08	3.81824e+08	1.00302e+09	3.41519e+08	1.86262e+08	1.22602e+08	6.5321e+07	3.56367e+08	2.95353e+08	2.19743e+08	9.63198e+07	3.94225e+07	7.06178e+07	1.07812e+09	6.63877e+08	4.00961e+08	9.74277e+07	9.5428e+07	3.18079e+08	7.01182e+07	1.83451e+08	6.13677e+08	4.20284e+08	5.3423e+08
TRUE	High	Master Protein	Q01484	Ankyrin-2 OS=Homo sapiens OX=9606 GN=ANK2 PE=1 SV=4	23	ANK2	6.26549e+07	8.34934e+07	2.98978e+07	1.84944e+08	1.25552e+08	4.12647e+08	4.72453e+07	4.59562e+07	4.20184e+07	1.79256e+08	5.30205e+07	4.53568e+07	3.86886e+07	1.91616e+07	1.94206e+08	1.09141e+08	5.05715e+07	4.81161e+07	1.78025e+07	1.48085e+07	1.17892e+08	3.38372e+07	3.39602e+07	2.95554e+07	8.83999e+07	1.58684e+08	2.82264e+08	9.10596e+07	4.98285e+07	1.11523e+08	3.17224e+07
TRUE	High	Master Protein	P13796	Plastin-2 OS=Homo sapiens OX=9606 GN=LCP1 PE=1 SV=6	31	LCP1	3.08824e+08	2.31491e+08	4.69093e+08	6.54178e+08	3.0574e+08	3.33368e+08	2.25151e+08	3.00312e+08	2.88292e+08	5.40283e+08	4.88055e+08	8.81675e+08	2.24369e+08	2.26646e+08	2.10674e+08	1.10113e+09	2.58258e+08	2.5957e+08	6.03752e+08	9.80771e+07	1.88956e+08	4.42698e+08	2.63929e+08	7.8863e+07	9.55374e+07	1.47197e+08	9.79957e+07	3.35103e+08	3.50347e+08	1.58342e+08	6.10455e+08
TRUE	High	Master Protein	Q9UBG0	C-type mannose receptor 2 OS=Homo sapiens OX=9606 GN=MRC2 PE=1 SV=2	33	MRC2	2.06968e+08	4.22228e+08	1.41216e+08	6.23692e+08	2.29953e+08	5.29793e+08	1.9783e+08	1.52084e+08	4.47598e+08	3.24157e+08	5.34995e+08	1.45816e+08	1.39385e+08	3.76986e+07	3.77684e+08	3.38327e+08	2.39491e+08	1.28869e+08	4.32203e+07	5.19657e+07	7.08209e+08	6.27823e+08	2.31061e+08	3.92207e+07	1.11309e+07	2.41793e+07	1.74405e+07	2.06343e+07	1.29869e+08	1.16191e+08	2.69073e+08
TRUE	High	Master Protein	O60716	Catenin delta-1 OS=Homo sapiens OX=9606 GN=CTNND1 PE=1 SV=1	34	CTNND1	2.89774e+08	2.32398e+08	1.1981e+08	2.25346e+08	1.64625e+08	1.45e+08	9.65909e+07	9.05511e+07	1.45423e+08	1.74333e+08	1.38413e+08	5.57083e+07	1.21912e+08	9.0149e+07	1.40494e+08	1.06453e+08	1.55478e+08	1.19901e+08	3.42597e+07	6.18084e+07	3.1123e+08	1.6803e+08	7.06835e+07	2.96054e+07	8.74326e+07	7.89565e+07	7.03959e+07	9.78952e+07	1.14105e+08	7.27539e+07	1.31254e+08
TRUE	High	Master Protein	P17655	Calpain-2 catalytic subunit OS=Homo sapiens OX=9606 GN=CAPN2 PE=1 SV=6	31	CAPN2	5.79172e+08	3.02483e+08	1.84734e+08	4.95355e+08	3.00188e+08	2.20707e+08	2.49927e+08	2.03633e+08	8.22433e+08	5.82882e+08	3.44648e+08	9.45763e+07	1.73307e+08	7.18066e+07	5.43196e+08	1.35678e+08	1.84934e+08	1.15354e+08	2.89553e+07	7.48506e+07	6.48118e+08	2.84334e+08	2.49077e+08	9.67107e+07	2.65973e+07	8.03955e+07	7.07469e+07	1.0764e+08	2.98962e+08	1.59921e+08	3.18378e+08
TRUE	High	Master Protein	P00738	Haptoglobin OS=Homo sapiens OX=9606 GN=HP PE=1 SV=1	13	HP	6.3415e+08	1.72999e+08	3.31089e+08	1.68922e+08	7.36384e+08	1.87694e+08	2.01933e+08	5.50843e+08	2.70886e+08	4.9612e+08	6.54155e+08	2.65723e+09	5.35776e+08	3.77084e+09	3.69803e+08	3.72214e+08	3.91776e+08	2.30928e+09	3.15054e+09	1.38167e+09	1.21083e+09	2.83876e+08	1.45771e+08	2.70365e+08	1.0815e+09	5.06316e+08	1.16513e+08	2.04449e+09	3.55401e+08	1.28555e+09	2.67656e+08
TRUE	High	Master Protein	P26038	Moesin OS=Homo sapiens OX=9606 GN=MSN PE=1 SV=3	35	MSN	6.34861e+08	8.74246e+08	6.18288e+08	9.98648e+08	8.07733e+08	9.68657e+08	5.72695e+08	4.71122e+08	1.31635e+09	9.19524e+08	1.16396e+09	7.38944e+08	5.93595e+08	6.07203e+08	8.30628e+08	4.39109e+08	1.05376e+09	3.58162e+08	3.03156e+08	1.14487e+08	8.96332e+08	7.85173e+08	1.42387e+09	3.50652e+08	2.70585e+08	5.36562e+08	7.91869e+08	9.22996e+08	1.26419e+09	7.70492e+08	1.10399e+09
TRUE	High	Master Protein	P68366	Tubulin alpha-4A chain OS=Homo sapiens OX=9606 GN=TUBA4A PE=1 SV=1	6	TUBA4A	3.36572e+08	1.96686e+08	1.71349e+08	4.40098e+08	2.01379e+08	4.28603e+08	1.46846e+08	1.52451e+08	1.73461e+08	2.57425e+08	2.06106e+08	4.01619e+07	1.04734e+08	1.09538e+08	1.0335e+08	2.27561e+08	1.32078e+08	7.71269e+07	9.52249e+07	2.80342e+07	2.10081e+08	1.72129e+08	9.73749e+06	3.48162e+06	7.07361e+07	1.59127e+08	4.40141e+08	1.82205e+08	1.09546e+08	8.60447e+07	1.31315e+08
TRUE	High	Master Protein	Q02218	2-oxoglutarate dehydrogenase, mitochondrial OS=Homo sapiens OX=9606 GN=OGDH PE=1 SV=3	33	OGDH	2.55204e+08	1.89118e+08	1.06852e+08	2.09318e+08	9.36718e+07	2.48386e+08	1.92408e+08	1.32834e+08	1.00377e+08	2.35881e+08	1.43597e+08	1.1773e+08	5.8087e+07	1.2712e+08	3.49917e+08	1.55734e+08	7.11071e+07	3.72859e+07	1.25255e+08	7.87022e+07	1.1565e+08	1.1422e+08	9.50883e+07	7.30891e+07	1.89743e+09	1.60081e+09	1.46019e+09	9.68019e+08	1.31791e+09	1.08158e+09	9.08319e+08
TRUE	High	Master Protein	P22626	Heterogeneous nuclear ribonucleoproteins A2/B1 OS=Homo sapiens OX=9606 GN=HNRNPA2B1 PE=1 SV=2	24	HNRNPA2B1	1.39847e+09	1.2974e+09	4.82507e+08	1.65282e+09	8.93335e+08	1.34708e+09	5.36637e+08	7.75995e+08	8.89101e+08	1.50167e+09	6.07528e+08	5.28752e+08	9.92003e+08	1.42432e+08	1.25224e+09	1.12389e+09	7.05083e+08	4.48849e+08	9.4077e+07	1.20968e+08	1.52072e+09	9.34125e+08	5.76454e+08	6.93747e+08	2.49374e+08	4.99749e+08	3.31427e+08	2.5805e+08	1.24158e+09	7.77019e+08	1.14858e+09
TRUE	High	Master Protein	Q9H4M9	EH domain-containing protein 1 OS=Homo sapiens OX=9606 GN=EHD1 PE=1 SV=2	26	EHD1	7.95197e+08	4.53129e+08	3.789e+08	2.98552e+08	8.49754e+07	3.59246e+08	1.95533e+08	2.38074e+08	3.42629e+08	1.44958e+08	4.91674e+08	1.2361e+08	4.88493e+08	1.15813e+08	5.54313e+08	9.66385e+07	4.29788e+08	9.70185e+07	9.25131e+07	5.20163e+07	3.57522e+08	2.77697e+08	2.7077e+08	1.19838e+08	1.96032e+08	2.04581e+08	2.91605e+08	3.00324e+08	2.99357e+08	3.13168e+08	3.31879e+08
TRUE	High	Master Protein	P04083	Annexin A1 OS=Homo sapiens OX=9606 GN=ANXA1 PE=1 SV=2	26	ANXA1	1.65023e+09	2.48982e+09	6.96643e+08	2.04108e+09	1.65466e+09	1.39369e+09	1.33461e+09	1.61477e+09	9.69253e+08	2.10484e+09	1.63841e+09	5.18504e+09	1.35267e+09	1.01783e+09	1.75486e+09	2.31631e+09	4.8668e+08	7.94296e+08	3.00829e+08	3.95673e+08	1.85365e+09	2.28771e+09	1.44179e+09	7.70243e+08	3.39115e+08	4.78517e+08	2.23067e+08	7.20925e+08	1.50138e+09	1.04716e+09	1.0604e+09
TRUE	High	Master Protein	P13637	Sodium/potassium-transporting ATPase subunit alpha-3 OS=Homo sapiens OX=9606 GN=ATP1A3 PE=1 SV=3	18	ATP1A3	9.36315e+07	1.35038e+07	2.54498e+07	1.71419e+07	1.76758e+07	1.6213e+07	7.85721e+06	2.03699e+07	1.9567e+07	2.61088e+07	1.95914e+07	2.21215e+07	1.74033e+07	7.81151e+07	1.33001e+07	8.62946e+07	1.99559e+07	6.25576e+07	2.94379e+07	2.58523e+07	4.56305e+07	1.08695e+07	8.3269e+06	1.30957e+07	3.95302e+07	3.71558e+07	3.322e+08	1.06048e+07	2.65376e+07	1.04257e+07	1.68424e+07
TRUE	High	Master Protein	P12110	Collagen alpha-2(VI) chain OS=Homo sapiens OX=9606 GN=COL6A2 PE=1 SV=4	27	COL6A2	4.12957e+08	2.52327e+08	6.55802e+08	4.69902e+08	2.78216e+08	4.37144e+08	3.36562e+08	2.11315e+08	2.10536e+08	2.66893e+08	4.36622e+08	6.55211e+08	1.74229e+09	4.99087e+08	5.4511e+08	8.66471e+08	1.1017e+09	7.92405e+08	8.24713e+08	4.25907e+08	3.50979e+09	3.27094e+08	5.16647e+08	8.14499e+08	1.20435e+09	1.88649e+09	1.25665e+09	1.97083e+09	3.67347e+08	4.06498e+08	4.59966e+08
TRUE	High	Master Protein	Q7KZF4	Staphylococcal nuclease domain-containing protein 1 OS=Homo sapiens OX=9606 GN=SND1 PE=1 SV=1	39	SND1	3.77126e+08	3.20253e+08	1.46723e+08	3.32244e+08	1.40678e+08	2.9795e+08	1.17779e+08	1.12244e+08	2.05229e+08	2.19814e+08	1.91172e+08	3.98995e+08	2.19016e+08	2.0193e+08	4.25463e+08	6.72525e+08	2.99514e+08	3.46445e+08	1.43492e+08	9.9825e+07	5.89868e+08	2.82578e+08	1.33514e+08	1.22837e+08	5.67743e+08	3.34938e+08	1.73078e+08	3.1457e+08	3.79676e+08	2.30182e+08	2.44045e+08
TRUE	High	Master Protein	P50993	Sodium/potassium-transporting ATPase subunit alpha-2 OS=Homo sapiens OX=9606 GN=ATP1A2 PE=1 SV=1	25	ATP1A2	4.03371e+07	6.01106e+07	5.07668e+07	5.21146e+07	2.52216e+08	2.67943e+07	1.56402e+08	1.03657e+08	5.46871e+07	2.60179e+07	4.45422e+07	6.05133e+07	5.35491e+07	4.53846e+07	8.8335e+07	2.50125e+08	3.25399e+08	7.33428e+07	2.96498e+07	1.29583e+07	1.99448e+08	9.46895e+07	1.51767e+08	2.04669e+08	3.02041e+08	1.34125e+09	7.01985e+08	1.04599e+09	1.1388e+08	2.42865e+07	1.04899e+08
TRUE	High	Master Protein	P09874	Poly [ADP-ribose] polymerase 1 OS=Homo sapiens OX=9606 GN=PARP1 PE=1 SV=4	42	PARP1	1.96672e+08	2.53143e+08	1.64712e+08	3.32187e+08	1.82517e+08	1.90534e+08	1.52767e+08	1.58988e+08	2.25349e+08	1.96627e+08	2.55419e+08	1.46024e+08	1.20511e+08	5.53518e+07	2.04728e+08	2.36964e+08	2.0461e+08	7.06044e+07	1.7313e+08	3.16467e+08	6.50824e+08	2.62507e+08	1.79307e+08	1.33105e+08	9.17208e+07	1.49346e+08	1.38862e+08	7.83736e+07	9.58356e+07	7.89804e+07	1.42939e+08
TRUE	High	Master Protein	P35573	Glycogen debranching enzyme OS=Homo sapiens OX=9606 GN=AGL PE=1 SV=3	45	AGL	5.21163e+07	3.46898e+08	1.12602e+08	4.60986e+08	4.46694e+07	5.12111e+07	3.54014e+07	3.87649e+07	4.55614e+07	2.65068e+07	8.25281e+07	2.39191e+08	7.59219e+07	3.32278e+08	1.31137e+08	1.16169e+08	1.62132e+08	1.17958e+08	5.98979e+07	3.13169e+07	9.98666e+07	2.85873e+08	5.98125e+07	4.32512e+07	2.91142e+07	5.2712e+07	8.08186e+07	4.70113e+07	7.85916e+07	2.78565e+07	3.63623e+08
TRUE	High	Master Protein	P02042	Hemoglobin subunit delta OS=Homo sapiens OX=9606 GN=HBD PE=1 SV=2	5	HBD	7.3448e+08	5.80211e+08	1.43548e+09	2.04165e+08	3.98957e+09	2.52819e+09	2.2465e+09	1.43717e+09	4.39833e+08	1.38589e+09	2.58106e+09	3.57237e+09	2.35843e+09	2.28656e+09	2.13556e+09	2.14756e+09	5.12827e+09	4.32866e+09	8.61576e+09	9.57608e+09	3.87692e+08	2.19067e+09	1.3112e+09	4.48988e+08	1.20663e+10	6.84739e+09	4.02966e+09	4.67812e+09	3.88217e+09	3.35311e+09	8.54112e+08
TRUE	High	Master Protein	O00159	Unconventional myosin-Ic OS=Homo sapiens OX=9606 GN=MYO1C PE=1 SV=4	44	MYO1C	4.65603e+08	3.60667e+08	1.24913e+08	2.04408e+08	1.036e+08	1.5794e+08	2.32471e+08	2.31734e+08	1.48009e+08	2.04511e+08	1.89647e+08	8.86149e+07	1.57604e+08	1.04851e+08	2.19943e+08	1.23281e+08	2.13015e+08	7.49768e+07	7.14519e+07	2.83605e+07	2.50763e+08	1.87715e+08	1.33117e+08	2.25534e+08	1.17768e+08	2.14051e+08	1.88779e+08	2.64957e+08	2.16595e+08	2.67952e+08	1.32212e+08
TRUE	High	Master Protein	A0A140TA41	Tenascin-X OS=Homo sapiens OX=9606 GN=TNXB PE=1 SV=1	25		123347	155183	141418	50303.3	49521.1	162906	178328	132440	43567.5	87135.7	183268	82197.6	4.72668e+06	153578	7.35124e+06	194815	214318	53087.4	175186	129209	3.52964e+06	159242	3853.49	175357	140284	164772	60600.8	1.34454e+06	127333	698212	189175
TRUE	High	Master Protein	P01011	Alpha-1-antichymotrypsin OS=Homo sapiens OX=9606 GN=SERPINA3 PE=1 SV=2	32	SERPINA3	3.39585e+08	3.8484e+07	2.15945e+08	1.1186e+08	2.04947e+08	1.15748e+08	1.38215e+08	2.31588e+08	8.47486e+07	9.87656e+07	1.67995e+08	8.54828e+07	2.4206e+08	2.63977e+09	1.3994e+08	1.78362e+08	1.50356e+08	6.69474e+08	1.60808e+09	2.14272e+08	1.84031e+08	1.60306e+08	1.89529e+08	1.41277e+08	3.82478e+08	2.62991e+08	6.14162e+08	1.31371e+09	3.65974e+08	8.99832e+08	3.89204e+08
TRUE	High	Master Protein	Q14203	Dynactin subunit 1 OS=Homo sapiens OX=9606 GN=DCTN1 PE=1 SV=3	6	DCTN1	2.74273e+08	1.34052e+08	1.02549e+08	2.1142e+08	1.32788e+08	1.49628e+08	9.76967e+07	1.2233e+08	2.36468e+08	1.69496e+08	2.47367e+08	1.30439e+08	9.18449e+07	5.84536e+08	8.39917e+07	1.54758e+08	1.67337e+08	9.60942e+07	3.64324e+07	1.74127e+08	1.04046e+08	1.83646e+08	3.65695e+08	3.83217e+08	7.95572e+08	4.68658e+08	2.87364e+08	2.39762e+08	4.50802e+08	4.19212e+08	8.73209e+08
TRUE	High	Master Protein	P40939	Trifunctional enzyme subunit alpha, mitochondrial OS=Homo sapiens OX=9606 GN=HADHA PE=1 SV=2	35	HADHA	4.64916e+08	3.54251e+08	1.30569e+08	6.59274e+08	2.03183e+08	4.44764e+08	1.49165e+08	1.84341e+08	1.68625e+08	2.31331e+08	3.09469e+08	3.07589e+08	3.61093e+08	1.06299e+08	4.51073e+08	4.51062e+08	2.84072e+08	1.08643e+08	7.10958e+07	5.12432e+07	4.37913e+08	3.10003e+08	1.48016e+08	9.96374e+07	1.74315e+08	3.9938e+08	2.61558e+08	2.79419e+08	4.73078e+08	2.4377e+08	4.85428e+08
TRUE	High	Master Protein	P49419	Alpha-aminoadipic semialdehyde dehydrogenase OS=Homo sapiens OX=9606 GN=ALDH7A1 PE=1 SV=5	29	ALDH7A1	1.02144e+09	4.51983e+08	3.30473e+08	1.60486e+09	3.0852e+08	1.53279e+09	1.59686e+08	1.89126e+08	3.17886e+08	9.77974e+08	1.8957e+08	2.93648e+08	4.81701e+08	1.18252e+08	8.04458e+08	2.06753e+08	3.60347e+08	2.15327e+08	5.31807e+07	4.06592e+07	8.64305e+08	3.20604e+08	5.6021e+08	2.44344e+08	1.19985e+08	3.1122e+08	1.87862e+08	2.83358e+08	2.11641e+09	2.9721e+08	5.35249e+08
TRUE	High	Master Protein	P07814	Bifunctional glutamate/proline--tRNA ligase OS=Homo sapiens OX=9606 GN=EPRS PE=1 SV=5	45	EPRS	1.17764e+08	1.55642e+08	5.87364e+07	2.00575e+08	1.01329e+08	1.35629e+08	1.14706e+08	8.75433e+07	1.19336e+08	1.86301e+08	7.08865e+07	7.22734e+07	4.53143e+07	2.93765e+07	1.03074e+08	1.2968e+08	7.98438e+07	3.36595e+07	2.05171e+07	1.48811e+07	1.72333e+08	1.86281e+08	7.10582e+07	2.13322e+08	3.55628e+07	6.64778e+07	7.70387e+07	6.18544e+07	1.68638e+08	7.4896e+07	1.25912e+08
TRUE	High	Master Protein	P32119	Peroxiredoxin-2 OS=Homo sapiens OX=9606 GN=PRDX2 PE=1 SV=5	22	PRDX2	8.08203e+08	1.5444e+09	1.6504e+09	1.07471e+09	1.25255e+09	9.95833e+08	1.19523e+09	1.37904e+09	1.1349e+09	7.99865e+08	1.51185e+09	1.62652e+09	8.6783e+08	8.00654e+08	1.59599e+09	1.66036e+09	1.43775e+09	9.52247e+08	1.09152e+09	2.5327e+09	7.20131e+08	1.21665e+09	1.12563e+09	3.59358e+08	7.23354e+09	6.23653e+09	6.28049e+09	4.86474e+09	4.28257e+09	4.05877e+09	9.94881e+08
TRUE	High	Master Protein	P23634	Plasma membrane calcium-transporting ATPase 4 OS=Homo sapiens OX=9606 GN=ATP2B4 PE=1 SV=2	22	ATP2B4	2.3966e+08	3.28735e+08	1.36366e+08	2.65644e+08	1.27247e+08	2.21359e+08	1.7404e+08	1.73059e+08	2.31364e+08	2.64123e+08	2.31702e+08	3.72919e+08	4.02202e+08	4.42644e+08	3.83994e+08	4.22398e+08	2.29187e+08	1.35946e+08	8.32617e+07	4.35545e+07	9.86907e+08	2.25776e+08	1.68387e+08	5.21715e+08	2.37812e+08	3.05769e+08	4.18067e+08	2.54313e+08	4.15457e+08	2.75986e+08	4.82668e+08
TRUE	High	Master Protein	P07951	Tropomyosin beta chain OS=Homo sapiens OX=9606 GN=TPM2 PE=1 SV=1	3	TPM2	9.19282e+06	2.72119e+07	5.03285e+07	5.14253e+07	3.32991e+07	7.3939e+07	9.6735e+07	1.0579e+08	6.04065e+07	1.04009e+08	2.15576e+07	4.89315e+07	3.22231e+08	5.34035e+08	1.53199e+07	9.59441e+06	6.57202e+07	6.93206e+07	4.39872e+07	1.98566e+07	9.47659e+07	1.5023e+08	6.19935e+07	8.08351e+07	5.0894e+07	6.87453e+08	2.00014e+08	7.04914e+08	5.85911e+07	5.01069e+07	1.19367e+08
TRUE	High	Master Protein	P14923	Junction plakoglobin OS=Homo sapiens OX=9606 GN=JUP PE=1 SV=3	28	JUP	2.74241e+08	5.39844e+08	1.58044e+08	4.49775e+08	2.08784e+08	1.61877e+08	7.32682e+08	8.30569e+08	6.25552e+08	8.01513e+08	2.41871e+08	1.92406e+08	9.37587e+07	4.57007e+07	1.04296e+08	1.08477e+08	4.42723e+08	7.89661e+07	1.5061e+07	3.81101e+07	9.45032e+07	2.74797e+08	3.16995e+08	9.88427e+07	2.78563e+08	2.86865e+08	1.42973e+08	2.14344e+08	3.44514e+08	1.06865e+08	1.86451e+08
TRUE	High	Master Protein	P25705	ATP synthase subunit alpha, mitochondrial OS=Homo sapiens OX=9606 GN=ATP5F1A PE=1 SV=1	31	ATP5A1	1.668e+09	1.86475e+09	6.94781e+08	2.15331e+09	1.13639e+09	1.82505e+09	8.72869e+08	1.14528e+09	1.0032e+09	1.62458e+09	1.05161e+09	6.52739e+08	1.09065e+09	4.63025e+08	1.27696e+09	1.42963e+09	7.61021e+08	6.97738e+08	2.45502e+08	1.09955e+08	1.56203e+09	1.32734e+09	9.77291e+08	2.69269e+08	1.38762e+09	2.94454e+09	3.05332e+09	2.20142e+09	3.3951e+09	1.88205e+09	2.11131e+09
TRUE	High	Master Protein	G5E9E7	Tight junction protein 1 (Zona occludens 1), isoform CRA_e OS=Homo sapiens OX=9606 GN=TJP1 PE=1 SV=1	7	TJP1	6.482e+07	4.62616e+07	1.67182e+07	4.28592e+07	9.52962e+06	2.26314e+07	2.18198e+07	4.33017e+07	3.8717e+07	6.38609e+07	8.97785e+06	7.89441e+06	4.00943e+06	1.17735e+07	2.28121e+07	5.85393e+06	1.13336e+07	6.8095e+06	8.332e+06	898701	3.44219e+07	2.49143e+07	4.41036e+07	2.96545e+07	1.9815e+07	2.72811e+07	8.40729e+06	2.48408e+07	3.77874e+07	2.4825e+07	2.70167e+07
TRUE	High	Master Protein	O75083	WD repeat-containing protein 1 OS=Homo sapiens OX=9606 GN=WDR1 PE=1 SV=4	25	WDR1	3.16822e+08	3.71693e+08	2.31836e+08	3.92961e+08	1.93078e+08	3.52715e+08	3.11596e+08	2.39679e+08	4.06578e+08	3.80997e+08	3.10273e+08	2.95167e+08	2.55122e+08	1.11932e+08	1.17042e+08	2.53937e+08	2.51596e+08	1.44437e+08	7.85959e+07	6.94989e+07	1.90209e+08	4.15368e+08	3.21652e+08	1.77433e+08	2.1306e+08	3.07739e+08	3.099e+08	4.11605e+08	2.95495e+08	2.28206e+08	5.14496e+08
TRUE	High	Master Protein	P51888	Prolargin OS=Homo sapiens OX=9606 GN=PRELP PE=1 SV=1	26	PRELP	1.83134e+09	4.12007e+08	1.95764e+09	3.00337e+08	8.75585e+07	4.75264e+08	1.65427e+08	7.67306e+08	1.96196e+08	3.61772e+08	4.20994e+08	6.4829e+08	9.5569e+09	8.67896e+09	8.93348e+08	2.1886e+08	1.50438e+09	7.49126e+09	7.55392e+09	3.3786e+09	7.14763e+08	1.48553e+08	3.43098e+08	9.30842e+07	8.4566e+09	1.99346e+09	3.05748e+09	4.85396e+09	8.05945e+08	4.29279e+09	1.30256e+09
TRUE	High	Master Protein	P07237	Protein disulfide-isomerase OS=Homo sapiens OX=9606 GN=P4HB PE=1 SV=3	37	P4HB	7.58663e+08	9.66853e+08	6.94146e+08	1.3183e+09	7.14107e+08	1.19995e+09	1.34491e+09	1.80295e+09	1.08081e+09	1.59326e+09	1.32518e+09	1.58817e+09	1.06199e+09	2.51766e+08	9.50732e+08	1.96272e+09	7.42483e+08	7.0315e+08	9.67938e+08	4.11739e+08	9.57664e+08	9.66885e+08	1.92863e+09	6.00638e+08	3.45083e+08	7.33967e+08	5.61699e+08	9.12108e+08	1.04044e+09	1.40012e+09	2.00333e+09
TRUE	High	Master Protein	P50454	Serpin H1 OS=Homo sapiens OX=9606 GN=SERPINH1 PE=1 SV=2	22	SERPINH1	6.27559e+08	6.12998e+08	3.96469e+08	4.88114e+08	7.8451e+07	4.5247e+08	2.68828e+08	2.07716e+08	5.04913e+08	1.13517e+09	4.24238e+08	1.93525e+08	3.35782e+08	1.44511e+08	2.4563e+08	3.73273e+08	3.62006e+08	1.64637e+08	1.08226e+08	5.91393e+07	1.01576e+09	5.75449e+08	4.20762e+08	8.52294e+07	2.00032e+08	4.83129e+08	1.90185e+08	2.67512e+08	3.09792e+08	6.19783e+08	6.49697e+08
TRUE	High	Master Protein	P00734	Prothrombin OS=Homo sapiens OX=9606 GN=F2 PE=1 SV=2	29	F2	2.44331e+08	1.41869e+08	4.3605e+08	1.52138e+08	1.23987e+08	1.51715e+08	1.57873e+08	1.8182e+08	1.07052e+08	1.41692e+08	2.94092e+08	1.7275e+08	3.10349e+08	2.89776e+08	2.20059e+08	1.30049e+08	2.23868e+08	4.6176e+08	3.22431e+08	4.21703e+08	1.50006e+08	1.16626e+08	1.03613e+08	5.16495e+07	1.0597e+08	9.62419e+07	1.59815e+08	8.78408e+07	9.04145e+07	1.95657e+08	7.1375e+07
TRUE	High	Master Protein	Q14767	Latent-transforming growth factor beta-binding protein 2 OS=Homo sapiens OX=9606 GN=LTBP2 PE=1 SV=3	33	LTBP2	1.35434e+08	8.47678e+07	2.34848e+07	7.8691e+07	9.47677e+07	9.42937e+08	8.70066e+07	1.43308e+08	9.354e+07	2.61652e+08	2.60099e+08	5.07607e+07	1.60827e+08	1.20093e+08	6.37279e+07	5.10987e+07	9.71075e+07	1.93394e+07	9.89555e+07	8.23082e+07	1.02751e+08	3.86547e+08	4.54022e+07	2.85292e+08	1.47153e+08	8.28776e+07	3.04262e+07	1.04471e+08	1.02917e+08	5.3178e+07	1.25319e+08
TRUE	High	Master Protein	P12956	X-ray repair cross-complementing protein 6 OS=Homo sapiens OX=9606 GN=XRCC6 PE=1 SV=2	33	XRCC6	3.80981e+08	6.26568e+08	3.19372e+08	5.35733e+08	3.33786e+08	3.37687e+08	3.17746e+08	2.88805e+08	3.7021e+08	4.64607e+08	4.36491e+08	3.55537e+08	2.82007e+08	1.38021e+08	3.96357e+08	6.54116e+08	4.34719e+08	1.7602e+08	1.05116e+08	8.91484e+07	8.60708e+08	5.28304e+08	4.58078e+08	9.29095e+07	7.73461e+07	2.60331e+08	1.62211e+08	2.37749e+08	5.07584e+08	2.2734e+08	2.6275e+08
TRUE	High	Master Protein	Q6P2Q9	Pre-mRNA-processing-splicing factor 8 OS=Homo sapiens OX=9606 GN=PRPF8 PE=1 SV=2	50	PRPF8	1.0294e+08	2.61132e+08	3.3046e+07	1.03755e+08	1.63367e+08	8.4109e+07	4.40401e+07	5.76856e+07	5.87335e+07	7.61574e+07	5.48268e+07	8.66277e+07	3.73807e+07	1.09849e+08	8.66169e+07	1.01569e+08	8.49233e+07	1.94888e+07	6.59019e+07	3.99653e+07	1.25541e+08	1.05659e+08	2.98523e+08	9.56891e+07	2.3653e+07	8.69374e+07	4.41816e+07	4.82706e+07	1.01236e+08	5.93789e+07	1.19079e+08
TRUE	High	Master Protein	P18669	Phosphoglycerate mutase 1 OS=Homo sapiens OX=9606 GN=PGAM1 PE=1 SV=2	21	PGAM1; LOC643576	7.71907e+08	8.90249e+08	4.00462e+08	8.21985e+08	8.54823e+08	4.86092e+08	5.26033e+08	2.98481e+08	9.84949e+08	8.94058e+08	3.96336e+08	3.15376e+08	2.88106e+08	2.37634e+08	3.08893e+08	4.54813e+08	3.32141e+08	2.6926e+08	9.82754e+07	9.72218e+07	2.16563e+08	7.78656e+08	1.41669e+08	2.90119e+08	9.81337e+07	3.41117e+08	5.32297e+08	3.60817e+08	5.33853e+08	4.83366e+08	9.11202e+08
TRUE	High	Master Protein	P00915	Carbonic anhydrase 1 OS=Homo sapiens OX=9606 GN=CA1 PE=1 SV=2	18	CA1	3.88374e+08	1.25571e+08	1.11171e+09	1.11288e+08	8.22247e+08	3.35565e+08	5.81272e+08	3.67746e+08	1.36225e+08	3.11219e+08	7.25032e+08	1.66586e+09	3.46126e+08	6.63441e+08	7.04366e+08	7.7093e+08	2.30719e+09	9.95168e+08	1.23389e+09	4.0166e+09	2.96004e+08	7.44232e+08	8.14113e+08	2.33307e+08	5.34574e+09	8.88345e+08	1.7278e+09	1.93698e+09	1.79209e+09	1.96823e+09	6.25131e+08
TRUE	High	Master Protein	P63010	AP-2 complex subunit beta OS=Homo sapiens OX=9606 GN=AP2B1 PE=1 SV=1	23	AP2B1	2.91043e+08	2.50727e+08	1.3739e+08	3.9832e+08	1.77241e+08	2.74537e+08	1.82763e+08	1.45383e+08	2.42355e+08	3.86744e+08	2.29084e+08	1.69201e+08	1.39268e+08	7.5429e+07	1.80474e+08	3.36708e+08	1.18554e+08	8.37545e+07	4.4168e+07	4.26252e+07	3.22985e+08	1.99291e+08	1.86566e+08	9.71839e+07	1.17847e+08	3.65685e+08	6.16e+08	2.4035e+08	5.20737e+08	2.79976e+08	4.40648e+08
TRUE	High	Master Protein	P27797	Calreticulin OS=Homo sapiens OX=9606 GN=CALR PE=1 SV=1	23	CALR	1.36761e+09	1.24204e+09	7.77936e+08	2.29478e+09	9.87316e+08	2.38001e+09	9.6529e+08	7.32552e+08	1.68333e+09	1.97972e+09	1.16221e+09	1.40619e+09	6.80547e+08	5.44777e+08	7.42562e+08	2.02974e+09	8.12493e+08	3.5693e+08	2.8181e+08	2.22e+08	1.60634e+09	1.7863e+09	1.63691e+08	3.47257e+08	2.11866e+08	4.9608e+08	1.33765e+08	5.91313e+08	4.30292e+08	9.64889e+08	5.94741e+08
TRUE	High	Master Protein	Q12906	Interleukin enhancer-binding factor 3 OS=Homo sapiens OX=9606 GN=ILF3 PE=1 SV=3	27	ILF3	3.93483e+08	3.9678e+08	9.87143e+07	4.33073e+08	2.48236e+08	3.36591e+08	1.76897e+08	1.63996e+08	2.5234e+08	2.86716e+08	1.16144e+08	2.22e+08	2.33814e+08	4.16737e+08	2.63074e+08	3.16985e+08	1.57604e+08	3.22535e+08	1.698e+08	1.34354e+07	4.2015e+08	3.16545e+08	4.68693e+08	1.64618e+08	1.26531e+08	4.34584e+08	7.61815e+08	3.62461e+08	6.39702e+08	3.8597e+08	4.6138e+08
TRUE	High	Master Protein	Q9NYU2	UDP-glucose:glycoprotein glucosyltransferase 1 OS=Homo sapiens OX=9606 GN=UGGT1 PE=1 SV=3	43	UGGT1	2.03997e+08	1.5173e+08	6.87477e+07	1.91528e+08	8.12041e+07	2.20984e+08	9.84725e+07	1.16805e+08	8.87137e+07	2.48788e+08	9.52199e+07	1.1426e+08	7.52728e+07	2.75242e+07	8.16194e+07	2.02072e+08	7.45263e+07	6.41241e+07	2.75027e+07	2.28698e+07	1.81242e+08	8.0571e+07	3.78466e+08	5.22817e+07	3.12258e+07	6.49009e+07	4.86764e+07	5.82523e+07	1.47042e+08	7.70255e+07	1.38068e+08
TRUE	High	Master Protein	P00367	Glutamate dehydrogenase 1, mitochondrial OS=Homo sapiens OX=9606 GN=GLUD1 PE=1 SV=2	29	GLUD1	3.96597e+08	3.13771e+08	1.51707e+08	7.06322e+08	2.10441e+08	4.03837e+08	2.51898e+08	3.95831e+08	1.52593e+08	3.95828e+08	1.04315e+08	1.94243e+08	3.30396e+08	1.71454e+08	2.48375e+08	3.66609e+08	3.2458e+08	1.38835e+08	1.28805e+08	3.45645e+07	3.02579e+08	2.58877e+08	2.72862e+08	1.91031e+08	3.27635e+08	6.10757e+08	6.84166e+08	6.4986e+08	6.53392e+08	4.90753e+08	6.51794e+08
TRUE	High	Master Protein	Q92499	ATP-dependent RNA helicase DDX1 OS=Homo sapiens OX=9606 GN=DDX1 PE=1 SV=2	35	DDX1	3.02457e+08	2.82738e+08	1.4477e+08	3.49996e+08	1.81972e+08	2.565e+08	9.29594e+07	1.46126e+08	2.10532e+08	1.45898e+08	1.51706e+08	8.29709e+08	2.01827e+08	7.39988e+07	3.43508e+08	5.47241e+08	1.35039e+08	1.75019e+08	9.29115e+07	3.43805e+07	3.07237e+08	2.23107e+08	3.87995e+08	3.93947e+07	8.27801e+08	9.55664e+07	6.40578e+08	1.06885e+08	4.65157e+08	1.42168e+08	1.51799e+08
TRUE	High	Master Protein	P02730	Band 3 anion transport protein OS=Homo sapiens OX=9606 GN=SLC4A1 PE=1 SV=3	32	SLC4A1	2.18847e+08	1.00636e+08	3.46411e+08	1.05655e+08	2.63931e+08	2.79259e+08	1.6174e+08	2.85015e+08	8.30909e+07	1.88971e+08	3.86194e+08	1.56539e+08	4.91653e+07	1.67043e+08	2.65674e+08	1.74097e+08	4.56896e+08	1.42905e+08	2.35312e+08	7.48705e+08	6.68746e+07	2.13493e+08	9.02979e+07	4.58989e+07	8.57263e+08	4.89836e+08	4.28818e+08	2.71277e+08	3.01111e+08	1.93282e+08	6.62737e+07
TRUE	High	Master Protein	Q9Y3Z3	Deoxynucleoside triphosphate triphosphohydrolase SAMHD1 OS=Homo sapiens OX=9606 GN=SAMHD1 PE=1 SV=2	38	SAMHD1	2.45167e+08	2.21189e+08	2.21058e+08	6.32375e+08	1.34696e+08	3.11748e+08	7.64696e+07	7.81742e+07	1.63319e+08	3.62949e+08	1.11059e+08	2.06058e+08	2.57663e+08	1.42589e+08	1.02323e+08	2.13948e+08	2.054e+08	8.43982e+07	8.55569e+07	1.51032e+08	7.0849e+08	3.84642e+08	1.00425e+08	1.44893e+08	6.53784e+07	1.65064e+08	1.58208e+08	1.07951e+08	2.14907e+08	1.48477e+08	3.30407e+08
TRUE	High	Master Protein	P13797	Plastin-3 OS=Homo sapiens OX=9606 GN=PLS3 PE=1 SV=4	24	PLS3	6.21075e+07	3.84726e+07	3.8444e+07	5.18713e+07	5.57922e+07	4.93609e+07	5.121e+07	3.87463e+07	5.00282e+07	5.63229e+07	5.85566e+07	6.77413e+07	7.78293e+07	7.50991e+07	3.90146e+07	2.88495e+09	8.20187e+07	7.16052e+07	2.50904e+07	2.29457e+07	8.87851e+07	3.2494e+07	6.52216e+07	5.07891e+07	2.9273e+07	2.4977e+07	7.63521e+07	8.61643e+07	4.05039e+07	3.68512e+07	5.20362e+07
TRUE	High	Master Protein	P31150	Rab GDP dissociation inhibitor alpha OS=Homo sapiens OX=9606 GN=GDI1 PE=1 SV=2	18	GDI1	1.61861e+08	1.4869e+08	7.35931e+07	1.32709e+08	1.63599e+08	1.27995e+08	9.45471e+07	8.7216e+07	8.45511e+07	1.17377e+08	8.51466e+07	6.65882e+07	6.62617e+07	4.08588e+07	7.48114e+07	1.48382e+08	7.7015e+07	7.78988e+07	5.14541e+07	2.28444e+07	7.70195e+07	8.65678e+07	8.58873e+07	1.86552e+07	9.28169e+07	1.40229e+08	3.36047e+08	1.37148e+08	3.82836e+08	1.49306e+08	7.45847e+07
TRUE	High	Master Protein	Q14974	Importin subunit beta-1 OS=Homo sapiens OX=9606 GN=KPNB1 PE=1 SV=2	32	KPNB1	3.79085e+08	3.03325e+08	5.23877e+08	3.44908e+08	1.40915e+09	2.07066e+08	1.3503e+09	1.3003e+08	1.9559e+08	2.22933e+08	1.77416e+08	1.78454e+08	1.06679e+08	8.28536e+07	1.78257e+08	1.81156e+08	8.32694e+07	8.08951e+07	5.53467e+07	6.01192e+07	2.61306e+08	3.34551e+08	1.03891e+08	1.15892e+08	3.1236e+07	9.37198e+07	6.16973e+07	7.69698e+07	2.34681e+08	1.69148e+08	2.92203e+08
TRUE	High	Master Protein	P60174	Triosephosphate isomerase OS=Homo sapiens OX=9606 GN=TPI1 PE=1 SV=3	23	TPI1	1.89595e+09	2.5158e+09	1.06003e+09	2.30291e+09	1.89142e+09	1.59203e+09	2.57212e+09	2.43998e+09	1.90505e+09	2.08803e+09	1.49373e+09	1.86593e+09	9.5866e+08	7.06408e+08	1.92271e+09	1.67308e+09	1.29267e+09	8.55743e+08	4.16479e+08	3.00358e+08	1.23568e+09	2.67134e+09	6.05905e+08	5.48568e+08	8.47389e+08	1.3468e+09	1.27127e+09	1.06569e+09	1.83748e+09	2.30918e+09	2.52844e+09
TRUE	High	Master Protein	P00751	Complement factor B OS=Homo sapiens OX=9606 GN=CFB PE=1 SV=2	32	CFB	6.80189e+07	1.08061e+08	2.90262e+08	2.17988e+08	2.10636e+08	2.54343e+08	2.1859e+08	2.11266e+08	2.34479e+08	1.02194e+08	2.44123e+08	2.14313e+08	3.01308e+08	9.05799e+08	1.24374e+08	1.85067e+08	1.37822e+08	5.3329e+08	7.80445e+08	3.71017e+08	2.3545e+08	1.55275e+08	1.24606e+08	1.57272e+08	1.56876e+08	8.05001e+07	1.26953e+08	1.2622e+08	1.01315e+08	2.32853e+08	1.20527e+08
TRUE	High	Master Protein	P00338	L-lactate dehydrogenase A chain OS=Homo sapiens OX=9606 GN=LDHA PE=1 SV=2	17	LDHA	1.41275e+09	5.71767e+08	3.7148e+08	1.01531e+09	5.24972e+08	5.06121e+08	1.68039e+09	1.45925e+09	1.04562e+09	1.10736e+09	1.56204e+09	7.81848e+08	7.43811e+08	4.71859e+08	1.8685e+09	7.16314e+08	1.20046e+09	4.05519e+08	5.3117e+08	1.40946e+08	8.13346e+08	1.35343e+09	7.36219e+08	1.4463e+08	4.6353e+08	7.56453e+08	9.82653e+08	9.62265e+08	1.77809e+09	1.76831e+09	1.9205e+09
TRUE	High	Master Protein	Q92597	Protein NDRG1 OS=Homo sapiens OX=9606 GN=NDRG1 PE=1 SV=1	16	NDRG1	1.95751e+09	9.34112e+08	3.85991e+08	6.21664e+08	4.96319e+08	1.56754e+09	7.82273e+08	8.05964e+08	4.13242e+08	7.41023e+08	4.6188e+08	6.62933e+07	3.16249e+08	1.04365e+09	4.79101e+08	9.89741e+07	1.13645e+09	2.7029e+08	1.88766e+09	1.24139e+08	6.27889e+08	6.66267e+08	1.64e+08	2.48567e+08	2.73733e+07	3.07221e+07	7.88547e+06	4.21453e+07	1.73208e+08	1.455e+08	1.82849e+08
TRUE	High	Master Protein	Q15075	Early endosome antigen 1 OS=Homo sapiens OX=9606 GN=EEA1 PE=1 SV=2	45	EEA1	1.49097e+08	1.04085e+08	3.45275e+07	2.79348e+08	1.60909e+08	2.6769e+08	1.38652e+08	1.29861e+08	1.41757e+08	2.32095e+08	1.03911e+08	9.9842e+07	6.15322e+07	5.29579e+07	1.57818e+08	1.11663e+08	8.80459e+07	3.87394e+07	2.19557e+07	1.75136e+07	1.12732e+08	1.3168e+08	6.45307e+07	1.78365e+08	7.7888e+07	1.18742e+08	1.74442e+08	8.59661e+07	2.26986e+08	1.61423e+08	1.59944e+08
TRUE	High	Master Protein	Q8WUM4	Programmed cell death 6-interacting protein OS=Homo sapiens OX=9606 GN=PDCD6IP PE=1 SV=1	40	PDCD6IP	2.21528e+08	2.84047e+08	1.71638e+08	4.38251e+08	2.71007e+08	2.57169e+08	2.6037e+08	2.6503e+08	4.33687e+08	2.51369e+08	3.23498e+08	3.17392e+08	2.60279e+08	1.64584e+08	3.19391e+08	3.33407e+08	2.91655e+08	1.36392e+08	9.94876e+07	5.9599e+07	3.95172e+08	3.58e+08	5.39078e+08	2.26785e+08	1.15107e+08	1.87736e+08	1.84514e+08	2.06632e+08	3.40705e+08	2.80396e+08	3.13212e+08
TRUE	High	Master Protein	P07585	Decorin OS=Homo sapiens OX=9606 GN=DCN PE=1 SV=1	7	DCN	1.24082e+09	2.10746e+08	3.74955e+08	9.88528e+07	4.01434e+07	7.47088e+07	2.2183e+08	4.60384e+08	1.43518e+08	3.74338e+08	1.36404e+08	9.63799e+08	6.25152e+09	1.69068e+09	2.65831e+08	7.30927e+07	2.18489e+08	2.76565e+09	1.42521e+09	4.94092e+09	6.77501e+08	5.70103e+07	5.02008e+07	3.54536e+07	7.37734e+08	8.15461e+08	5.65285e+08	1.14734e+09	6.65438e+07	3.58021e+09	5.79541e+08
TRUE	High	Master Protein	Q92896	Golgi apparatus protein 1 OS=Homo sapiens OX=9606 GN=GLG1 PE=1 SV=2	33	GLG1	2.01127e+08	2.78144e+08	1.04506e+08	2.25377e+08	1.7202e+08	2.7763e+08	2.13188e+08	1.56879e+08	1.48972e+08	3.38268e+08	1.70116e+08	1.7245e+08	5.61955e+07	2.00214e+07	1.34024e+08	1.65093e+08	1.38179e+08	3.41368e+07	4.37648e+07	2.29488e+07	2.00282e+08	2.80036e+08	2.09882e+08	2.32283e+08	4.38556e+07	5.15987e+07	2.53301e+07	5.55458e+07	1.39496e+08	1.1012e+08	1.80719e+08
TRUE	High	Master Protein	P02790	Hemopexin OS=Homo sapiens OX=9606 GN=HPX PE=1 SV=2	29	HPX	3.4391e+08	1.91386e+08	4.4102e+08	3.41331e+08	4.36454e+08	4.29658e+08	8.03937e+08	7.93692e+08	2.24099e+08	3.74451e+08	6.78923e+08	6.17921e+08	1.15089e+09	2.05687e+09	4.76845e+08	7.70913e+08	3.34456e+08	1.91085e+09	1.14399e+09	6.99146e+08	3.83417e+08	2.80631e+08	4.0693e+08	2.32367e+08	4.21072e+08	3.53789e+08	4.93532e+08	3.55099e+08	1.34246e+08	5.6801e+08	4.80897e+08
TRUE	High	Master Protein	P07942	Laminin subunit beta-1 OS=Homo sapiens OX=9606 GN=LAMB1 PE=1 SV=2	39	LAMB1	1.32989e+08	1.06799e+08	1.13914e+08	9.44492e+07	3.60302e+07	8.04521e+07	7.36487e+07	7.40597e+07	3.565e+07	3.18303e+07	6.52174e+07	1.61065e+08	8.79081e+07	2.21524e+07	8.21112e+07	6.39965e+07	9.37395e+07	2.30722e+07	4.21388e+07	1.36908e+07	1.40727e+08	6.51857e+07	3.46062e+08	5.23361e+07	5.5547e+07	6.98145e+07	6.32749e+07	4.68361e+07	6.66098e+07	8.12137e+07	5.02898e+07
TRUE	High	Master Protein	P13489	Ribonuclease inhibitor OS=Homo sapiens OX=9606 GN=RNH1 PE=1 SV=2	24	RNH1	7.13784e+08	9.37004e+08	4.61079e+08	7.51708e+08	6.51188e+08	2.88507e+08	4.82646e+08	2.38232e+08	6.21626e+08	8.85454e+08	5.50303e+08	3.18715e+08	4.19778e+08	2.40596e+08	4.13152e+08	7.21113e+08	1.19421e+09	2.83118e+08	1.76312e+08	2.07021e+08	9.00281e+08	4.95274e+08	7.53887e+08	1.74383e+08	1.43405e+08	1.77825e+08	8.7406e+07	1.71425e+08	3.91569e+08	3.93928e+08	4.80008e+08
TRUE	High	Master Protein	Q96HN2	Adenosylhomocysteinase 3 OS=Homo sapiens OX=9606 GN=AHCYL2 PE=1 SV=1	15	AHCYL2	4.8714e+08	6.64293e+08	1.98571e+08	4.98099e+08	4.59696e+08	2.38035e+08	2.34958e+08	3.05291e+08	1.42734e+09	2.84996e+08	3.38065e+08	3.87169e+08	2.85764e+08	9.55955e+07	6.32992e+08	2.95061e+08	2.82231e+08	2.13195e+08	2.67328e+07	2.38503e+07	5.50145e+08	3.03943e+08	1.06262e+09	1.50799e+08	1.80439e+08	2.31325e+08	2.00243e+08	2.0754e+08	7.20925e+08	2.16582e+08	3.93453e+08
TRUE	High	Master Protein	P35222	Catenin beta-1 OS=Homo sapiens OX=9606 GN=CTNNB1 PE=1 SV=1	20	CTNNB1	2.3315e+08	2.37161e+08	9.32584e+07	1.75038e+08	1.3639e+08	9.70063e+07	8.76666e+07	1.03446e+08	1.73272e+08	1.49817e+08	1.17653e+08	5.07121e+07	6.31679e+07	3.22064e+07	8.87919e+07	5.3419e+07	4.66342e+07	4.74636e+07	7.772e+06	2.84889e+07	1.31614e+08	2.3612e+08	1.0889e+08	5.65764e+07	6.5222e+07	1.38775e+08	8.41539e+07	1.12435e+08	3.74705e+08	1.23283e+08	1.84e+08
TRUE	High	Master Protein	P27816	Microtubule-associated protein 4 OS=Homo sapiens OX=9606 GN=MAP4 PE=1 SV=3	30	MAP4	4.27854e+08	1.2912e+09	1.51688e+09	3.84341e+08	5.46803e+08	3.72255e+08	8.25187e+08	2.51945e+08	7.18358e+08	4.64482e+08	1.27174e+09	4.93192e+07	2.00074e+08	2.87582e+08	1.89062e+08	1.72428e+08	5.33794e+08	2.9339e+08	6.31269e+07	6.88271e+07	5.76841e+08	7.44241e+08	5.42706e+08	2.17657e+08	6.73115e+07	6.71426e+07	8.1492e+07	7.63172e+07	1.82262e+08	2.48253e+08	5.07534e+08
TRUE	High	Master Protein	Q9Y6C2	EMILIN-1 OS=Homo sapiens OX=9606 GN=EMILIN1 PE=1 SV=3	30	EMILIN1	5.64839e+08	2.02545e+08	2.78473e+08	3.02889e+08	2.5683e+08	9.02504e+08	2.00349e+08	1.87221e+08	1.91077e+08	3.16724e+08	2.588e+08	1.41781e+08	2.58834e+08	1.58032e+08	1.61333e+08	2.68305e+08	1.80238e+08	1.46369e+08	1.19333e+08	5.02479e+07	7.64622e+08	3.72894e+08	9.94237e+08	3.42755e+08	1.05808e+08	3.63549e+08	1.24085e+08	2.91358e+08	1.101e+08	9.02476e+08	2.32232e+08
TRUE	High	Master Protein	P46939	Utrophin OS=Homo sapiens OX=9606 GN=UTRN PE=1 SV=2	50	UTRN	1.3645e+08	1.7505e+08	7.81293e+07	1.75426e+08	5.27569e+07	1.46373e+08	7.70649e+07	5.81472e+07	8.14768e+07	1.27129e+08	1.18199e+08	2.13978e+08	7.2791e+07	1.91597e+07	7.58034e+07	6.09911e+07	6.93662e+07	6.68918e+07	2.44415e+07	3.14647e+07	9.33214e+07	4.17076e+07	7.37383e+07	1.59202e+08	1.66454e+08	7.78097e+07	3.72462e+07	1.09911e+08	4.79404e+07	8.79746e+07	7.46251e+07
TRUE	High	Master Protein	Q00341	Vigilin OS=Homo sapiens OX=9606 GN=HDLBP PE=1 SV=2	3	HDLBP	2.00073e+08	1.41261e+08	9.16486e+07	1.76755e+08	8.87339e+07	1.54007e+08	1.03365e+08	9.27465e+07	1.12299e+08	2.16968e+08	1.24039e+08	5.08444e+07	9.3808e+07	5.36044e+07	1.40301e+08	1.95658e+08	1.2136e+08	4.44721e+07	2.93335e+07	1.62231e+07	2.30968e+08	2.06598e+08	2.02513e+08	1.3236e+08	1.18167e+08	1.16768e+08	1.7467e+08	1.19401e+08	2.3744e+08	1.82664e+08	1.98609e+08
TRUE	High	Master Protein	Q9Y4L1	Hypoxia up-regulated protein 1 OS=Homo sapiens OX=9606 GN=HYOU1 PE=1 SV=1	37	HYOU1	1.75055e+08	9.51634e+07	6.85184e+07	1.1787e+08	7.82257e+07	9.99998e+07	6.68124e+07	7.20906e+07	9.16579e+07	1.3858e+08	8.8597e+07	5.30111e+07	4.39689e+07	6.72999e+07	7.38127e+07	9.32861e+07	5.11485e+07	2.12392e+07	3.8154e+07	1.0585e+07	1.74091e+08	9.10417e+07	8.31731e+07	8.20602e+07	5.9465e+07	7.69318e+07	7.79409e+07	1.01071e+08	1.84454e+08	1.12892e+08	1.91812e+08
TRUE	High	Master Protein	Q03252	Lamin-B2 OS=Homo sapiens OX=9606 GN=LMNB2 PE=1 SV=4	36	LMNB2	6.52573e+08	6.17173e+08	2.9297e+08	6.49393e+08	6.85908e+08	3.94352e+08	4.03993e+08	2.63743e+08	4.91028e+08	5.42014e+08	3.88241e+08	8.32957e+08	7.70032e+08	3.03762e+08	7.65743e+08	6.38791e+08	3.22571e+08	5.5172e+08	2.2098e+08	9.12472e+07	6.26829e+08	6.76531e+08	1.26753e+09	5.5812e+08	3.99842e+08	6.06109e+08	2.27833e+08	6.56656e+08	4.84684e+08	9.67467e+08	5.44635e+08
TRUE	High	Master Protein	P09651	Heterogeneous nuclear ribonucleoprotein A1 OS=Homo sapiens OX=9606 GN=HNRNPA1 PE=1 SV=5	17	HNRNPA1	3.58662e+08	3.46773e+08	1.75674e+08	8.00427e+08	3.2882e+08	4.1477e+08	2.01481e+08	2.64534e+08	3.27704e+08	8.89424e+08	1.10078e+08	1.2552e+08	2.69328e+08	6.2474e+07	3.04106e+08	3.78536e+08	2.10408e+08	1.64976e+08	3.92553e+07	3.28367e+07	6.22549e+08	6.03615e+08	1.49805e+08	2.3818e+08	2.32024e+07	4.96596e+07	2.52508e+08	3.34399e+07	1.25438e+08	7.87031e+07	1.31682e+08
TRUE	High	Master Protein	P02788	Lactotransferrin OS=Homo sapiens OX=9606 GN=LTF PE=1 SV=6	35	LTF	3.78968e+07	1.83808e+07	1.88905e+07	1.68524e+07	7.32414e+07	4.95958e+07	2.1876e+07	4.35812e+07	2.37569e+07	2.42182e+07	1.78506e+07	2.23388e+09	7.00093e+07	3.14492e+07	5.42544e+07	8.09571e+07	2.75221e+07	1.25922e+08	3.09502e+07	8.9457e+07	1.22925e+08	1.28414e+07	2.56851e+08	1.31075e+08	5.35953e+07	2.7682e+07	1.16559e+07	2.78484e+07	3.31672e+07	2.55669e+07	2.29645e+08
TRUE	High	Master Protein	P02452	Collagen alpha-1(I) chain OS=Homo sapiens OX=9606 GN=COL1A1 PE=1 SV=5	32	COL1A1	1.40607e+09	5.12453e+08	1.74478e+09	1.76882e+08	6.12407e+07	1.92417e+08	1.31729e+08	1.91113e+08	1.67218e+08	7.9255e+08	1.20385e+08	1.02432e+09	2.03298e+09	7.61236e+08	4.78842e+08	1.97463e+08	3.4365e+08	9.10004e+08	5.26053e+08	5.04844e+08	9.58024e+08	1.56351e+08	1.42481e+09	5.88941e+09	2.34108e+08	4.97998e+08	5.75014e+08	3.89931e+08	1.97148e+08	4.28494e+08	2.87946e+08
TRUE	High	Master Protein	P49411	Elongation factor Tu, mitochondrial OS=Homo sapiens OX=9606 GN=TUFM PE=1 SV=2	26	TUFM	5.01398e+08	4.84412e+08	3.89829e+08	7.48032e+08	4.074e+08	6.21734e+08	3.74282e+08	5.71067e+08	3.43979e+08	4.73345e+08	2.1218e+08	2.21624e+08	2.13738e+08	9.15564e+07	3.5126e+08	3.64366e+08	2.00016e+08	1.86622e+08	4.35834e+07	3.87132e+07	4.80786e+08	5.24989e+08	1.57801e+08	1.64245e+08	4.28332e+08	7.38019e+08	3.56113e+08	4.49369e+08	6.92494e+08	3.91954e+08	2.11443e+08
TRUE	High	Master Protein	P08758	Annexin A5 OS=Homo sapiens OX=9606 GN=ANXA5 PE=1 SV=2	30	ANXA5	1.90671e+09	2.51005e+09	1.30284e+09	2.90929e+09	3.90324e+09	1.9439e+09	2.08277e+09	2.21858e+09	2.2332e+09	2.09376e+09	1.75854e+09	1.47763e+09	2.35221e+09	2.08041e+09	2.05625e+09	1.59249e+09	2.92239e+09	2.00919e+09	5.1091e+08	2.7297e+08	1.16333e+09	2.80367e+09	9.69568e+09	1.13347e+10	1.36435e+09	3.21634e+09	1.58791e+09	2.9551e+09	3.90177e+09	1.51399e+09	2.05239e+09
TRUE	High	Master Protein	P36871	Phosphoglucomutase-1 OS=Homo sapiens OX=9606 GN=PGM1 PE=1 SV=3	31	PGM1	1.27181e+08	2.09097e+08	3.13526e+08	2.34179e+08	1.04585e+08	1.77527e+08	1.73402e+08	8.20646e+07	4.54394e+08	3.53586e+08	2.65346e+08	2.04604e+08	3.29271e+08	1.7105e+08	3.44746e+08	4.27503e+08	3.20344e+08	2.15229e+08	9.3688e+07	9.40614e+07	2.90661e+08	1.66662e+08	2.31391e+08	1.82143e+08	8.7087e+07	1.29617e+08	1.4433e+08	1.31031e+08	2.63989e+08	2.47854e+08	2.13021e+08
TRUE	High	Master Protein	P06753	Tropomyosin alpha-3 chain OS=Homo sapiens OX=9606 GN=TPM3 PE=1 SV=2	3	TPM3	5.37083e+08	3.51114e+08	4.2018e+07	7.58269e+08	4.57124e+08	2.44184e+08	3.97332e+08	1.36141e+08	7.46709e+08	8.30425e+08	1.24713e+08	3.21571e+08	2.61431e+08	8.67494e+07	3.07447e+08	2.77906e+08	3.55653e+08	2.49022e+08	6.7269e+07	2.28211e+08	3.38086e+08	6.98407e+08	3.29819e+07	2.51431e+06	2.0155e+08	2.63066e+08	1.38844e+08	2.97439e+08	2.69963e+08	6.64177e+08	5.69887e+08
TRUE	High	Master Protein	P51659	Peroxisomal multifunctional enzyme type 2 OS=Homo sapiens OX=9606 GN=HSD17B4 PE=1 SV=3	29	HSD17B4	1.14666e+08	1.53348e+08	1.06271e+08	2.14094e+08	1.7445e+08	4.54894e+08	1.32607e+08	1.14838e+08	1.55618e+08	2.29954e+08	1.97545e+08	1.77277e+08	8.34697e+07	1.5111e+08	1.08724e+08	5.53883e+07	8.20247e+07	1.03817e+08	1.77568e+08	5.45024e+07	1.71764e+08	1.49107e+08	7.41544e+07	1.90893e+07	7.63807e+07	1.04931e+08	6.57419e+07	1.44951e+08	2.31204e+08	1.12392e+08	1.44842e+08
TRUE	High	Master Protein	Q9NZN4	EH domain-containing protein 2 OS=Homo sapiens OX=9606 GN=EHD2 PE=1 SV=2	27	EHD2	3.67112e+08	3.51681e+08	1.75115e+08	1.11868e+08	7.60129e+07	1.25628e+08	2.49098e+08	3.29915e+08	1.39035e+08	9.03054e+07	9.6118e+07	8.33407e+07	2.42012e+08	8.6166e+07	1.86118e+08	1.10839e+08	2.67678e+08	5.89144e+07	9.61891e+07	1.23783e+08	1.11967e+08	1.75184e+08	2.42037e+08	1.57414e+08	1.22577e+08	1.15045e+08	3.14606e+08	1.82008e+08	1.97458e+08	1.41814e+08	2.3145e+08
TRUE	High	Master Protein	P04844	Dolichyl-diphosphooligosaccharide--protein glycosyltransferase subunit 2 OS=Homo sapiens OX=9606 GN=RPN2 PE=1 SV=3	23	RPN2	2.11211e+08	1.85517e+08	1.24174e+08	2.47246e+08	8.97012e+07	2.55393e+08	1.69056e+08	1.23858e+08	1.09468e+08	1.95621e+08	2.42648e+08	9.35775e+07	7.3912e+07	6.31424e+07	1.52245e+08	1.58574e+08	6.79728e+07	3.50418e+07	1.34208e+07	2.69345e+07	3.0194e+08	2.24088e+08	3.75324e+07	4.22993e+06	2.95619e+07	3.45324e+07	2.19542e+07	1.8779e+07	7.38689e+07	2.64666e+07	9.8708e+07
TRUE	High	Master Protein	P78371	T-complex protein 1 subunit beta OS=Homo sapiens OX=9606 GN=CCT2 PE=1 SV=4	27	CCT2	1.44435e+08	1.91235e+08	2.60102e+08	1.77488e+08	2.2629e+08	1.6893e+08	1.3646e+08	1.47434e+08	1.64802e+08	1.54166e+08	1.21798e+08	1.49413e+08	1.67864e+08	1.00251e+08	1.87794e+08	1.34146e+08	1.59726e+08	9.49279e+07	9.71927e+07	4.71576e+07	1.45485e+08	2.17898e+08	2.66685e+07	9.77928e+07	1.52838e+08	2.58592e+08	2.64961e+08	2.52024e+08	3.82462e+08	2.55181e+08	2.22315e+08
TRUE	High	Master Protein	P35611	Alpha-adducin OS=Homo sapiens OX=9606 GN=ADD1 PE=1 SV=2	24	ADD1	3.32217e+08	4.39401e+08	1.79318e+08	3.10772e+08	2.22569e+08	3.23216e+08	2.8935e+08	2.41471e+08	3.27423e+08	3.55766e+08	2.74114e+08	8.88425e+07	2.51826e+08	1.57089e+08	1.43315e+08	1.5553e+08	2.57396e+08	1.11296e+08	6.79407e+07	1.08082e+08	1.31428e+08	4.15131e+08	8.35459e+07	5.74434e+07	3.08817e+08	3.56593e+08	2.05426e+08	2.6026e+08	5.98272e+08	4.93233e+08	4.58023e+08
TRUE	High	Master Protein	Q6ZN40	Tropomyosin 1 (Alpha), isoform CRA_f OS=Homo sapiens OX=9606 GN=TPM1 PE=1 SV=1	3	TPM1	9.06044e+08	1.4265e+09	1.21608e+09	7.47117e+08	9.36765e+08	9.02397e+08	1.17934e+09	7.9857e+08	1.2209e+09	1.89793e+09	3.60394e+08	5.57653e+08	1.93476e+09	1.97893e+09	5.84915e+08	6.96287e+08	6.9307e+08	8.79121e+08	5.35487e+08	1.70775e+08	7.46067e+08	9.91785e+08	9.31456e+08	2.08144e+09	5.58987e+08	3.35599e+09	4.31975e+09	7.64418e+09	9.3111e+08	1.08467e+09	1.05155e+09
TRUE	High	Master Protein	P04275	von Willebrand factor OS=Homo sapiens OX=9606 GN=VWF PE=1 SV=4	43	VWF	2.91962e+08	5.99765e+07	8.25843e+07	1.03588e+08	4.96016e+07	7.14909e+07	7.79877e+07	2.94733e+08	4.23773e+07	4.0378e+07	6.66103e+07	1.00773e+08	2.94922e+08	1.79585e+08	1.47322e+08	1.46708e+08	3.70434e+08	1.57903e+08	1.41168e+08	6.08313e+07	2.40997e+08	8.73128e+07	4.61161e+07	8.46603e+08	4.13126e+07	1.92086e+08	8.28476e+08	9.69214e+07	1.24123e+08	3.95017e+07	6.50753e+08
TRUE	High	Master Protein	P34932	Heat shock 70 kDa protein 4 OS=Homo sapiens OX=9606 GN=HSPA4 PE=1 SV=4	32	HSPA4	2.29676e+08	2.39744e+08	1.5484e+08	2.82911e+08	2.15211e+08	3.15177e+08	2.56731e+08	1.88265e+08	2.54978e+08	3.31999e+08	1.52689e+08	3.50629e+08	1.03514e+08	8.3504e+07	1.98541e+08	2.93986e+08	1.05284e+08	8.64672e+07	7.31362e+07	7.07251e+07	2.14973e+08	2.4536e+08	2.15122e+08	4.67591e+07	8.63868e+07	1.61368e+08	6.3324e+07	1.03169e+08	2.72711e+08	2.02535e+08	1.6438e+08
TRUE	High	Master Protein	Q6UWR7	Ectonucleotide pyrophosphatase/phosphodiesterase family member 6 OS=Homo sapiens OX=9606 GN=ENPP6 PE=1 SV=2	21	ENPP6	1.1708e+09	1.58621e+09	6.51713e+08	1.13819e+09	1.39648e+08	2.57424e+09	2.16752e+08	1.59908e+08	7.57162e+08	1.60453e+09	3.50074e+08	1.46418e+08	6.21338e+08	1.78979e+08	1.01965e+09	4.77111e+07	2.60422e+08	2.43697e+08	1.74365e+08	5.99845e+07	3.92532e+08	1.09341e+09	1.2423e+09	1.49519e+09	1.17536e+08	2.37063e+08	9.6627e+07	2.72287e+08	8.60752e+08	4.85102e+08	7.03957e+08
TRUE	High	Master Protein	P09525	Annexin A4 OS=Homo sapiens OX=9606 GN=ANXA4 PE=1 SV=4	28	ANXA4	6.00634e+08	8.8909e+08	3.85708e+08	8.68706e+08	3.9644e+08	8.46047e+08	4.30439e+08	2.69056e+08	7.63986e+08	2.77002e+08	8.18376e+08	5.95105e+08	6.54839e+08	1.84243e+08	1.49784e+09	3.7388e+08	3.84558e+08	4.79087e+08	8.82351e+07	2.27114e+08	1.17384e+09	7.43232e+08	7.5259e+08	4.60157e+08	2.05154e+08	2.48543e+08	3.286e+08	1.03706e+09	1.13934e+09	4.52353e+08	4.60765e+08
TRUE	High	Master Protein	P12270	Nucleoprotein TPR OS=Homo sapiens OX=9606 GN=TPR PE=1 SV=3	41	TPR	1.17854e+08	8.6053e+07	2.5535e+07	9.88456e+07	5.79216e+07	6.30608e+07	5.00931e+07	6.212e+07	4.86607e+07	7.99523e+07	4.46233e+07	1.50768e+08	3.9497e+07	1.45682e+07	6.05154e+07	9.33996e+07	9.92947e+07	2.16815e+07	6.84244e+07	8.5688e+06	1.98107e+08	1.25722e+08	5.36852e+07	1.61925e+07	5.9445e+07	9.3493e+07	3.64347e+07	7.90485e+07	5.33859e+07	6.62886e+07	4.98288e+07
TRUE	High	Master Protein	Q12805	EGF-containing fibulin-like extracellular matrix protein 1 OS=Homo sapiens OX=9606 GN=EFEMP1 PE=1 SV=2	7	EFEMP1	1.55089e+09	9.37608e+07	7.13514e+07	9.01443e+07	2.08959e+07	6.92667e+08	2.90183e+07	6.67808e+07	7.47576e+07	2.2408e+08	1.24169e+08	2.02399e+08	2.88349e+08	1.29565e+08	5.08505e+08	3.87723e+08	1.78532e+08	7.93798e+07	1.12005e+08	1.85198e+08	4.87348e+08	2.09735e+08	1.9471e+09	3.02728e+07	2.1607e+07	2.98167e+07	2.96174e+07	5.88377e+07	3.79337e+07	7.13581e+08	1.3292e+08
TRUE	High	Master Protein	P23142	Fibulin-1 OS=Homo sapiens OX=9606 GN=FBLN1 PE=1 SV=4	9	FBLN1	2.16452e+08	7.76617e+07	4.30651e+08	6.24413e+07	7.12024e+07	7.48871e+07	9.66309e+07	3.28429e+07	2.36475e+08	6.44333e+08	1.16442e+08	2.26736e+08	6.49505e+08	3.46357e+08	3.70068e+07	2.24448e+08	5.02106e+07	2.84407e+08	2.01718e+08	3.35947e+08	1.97191e+08	8.3689e+07	3.44334e+07	2.59735e+07	2.23337e+07	4.67681e+07	1.53975e+07	3.88652e+07	4.11861e+07	2.42593e+07	8.13415e+06
TRUE	High	Master Protein	P12277	Creatine kinase B-type OS=Homo sapiens OX=9606 GN=CKB PE=1 SV=1	18	CKB	5.77914e+08	2.10544e+08	2.06179e+08	1.32007e+08	2.35004e+08	4.46352e+07	9.64683e+07	2.09194e+08	2.78495e+08	7.88576e+07	3.9219e+08	1.10961e+08	1.6159e+08	6.39482e+07	8.15125e+07	4.63034e+08	1.29161e+08	9.03304e+07	2.97317e+07	5.77344e+07	1.49938e+08	2.02648e+08	6.67691e+07	2.43219e+07	7.68285e+07	1.66917e+08	7.03321e+08	2.74217e+08	4.86355e+07	6.48207e+07	3.17215e+07
TRUE	High	Master Protein	P51884	Lumican OS=Homo sapiens OX=9606 GN=LUM PE=1 SV=2	21	LUM	1.21649e+09	3.72614e+08	1.18104e+09	3.74027e+08	1.00288e+08	3.14235e+08	5.88838e+08	1.20734e+09	2.32332e+08	1.13618e+09	6.00665e+08	2.23591e+09	1.23983e+10	1.58306e+10	1.25044e+09	3.43829e+08	9.38895e+08	8.07358e+09	6.92649e+09	8.87211e+09	5.65936e+08	2.22123e+08	7.52528e+08	3.7572e+08	1.54501e+09	8.44226e+08	1.31945e+09	1.47108e+09	2.25602e+08	5.76476e+09	4.97231e+08
TRUE	High	Master Protein	O75533	Splicing factor 3B subunit 1 OS=Homo sapiens OX=9606 GN=SF3B1 PE=1 SV=3	32	SF3B1	1.16346e+08	1.16593e+08	4.70401e+07	1.20181e+08	5.31957e+07	9.2107e+07	3.85382e+07	4.93558e+07	6.59048e+07	7.32951e+07	6.91363e+07	3.83945e+07	2.05626e+07	4.93429e+07	5.44958e+07	1.1745e+08	8.01738e+07	3.66635e+07	4.06331e+07	1.78163e+07	1.45163e+08	1.45182e+08	1.1245e+08	1.53755e+08	2.83728e+07	4.74024e+07	1.10123e+08	3.97207e+07	9.61829e+07	4.11777e+07	1.55444e+08
TRUE	High	Master Protein	P06737	Glycogen phosphorylase, liver form OS=Homo sapiens OX=9606 GN=PYGL PE=1 SV=4	28	PYGL	1.4464e+08	1.13865e+08	9.71249e+07	8.34686e+07	6.1854e+07	1.37896e+08	5.10987e+07	4.39554e+07	7.51335e+07	7.2399e+07	9.69186e+07	2.43772e+08	9.51347e+07	7.86504e+07	1.9529e+08	3.23874e+08	7.81794e+07	5.36777e+07	7.72817e+07	3.91669e+07	1.52471e+08	8.85112e+07	1.46588e+08	1.00806e+08	2.63397e+07	4.76094e+07	2.55713e+07	6.89724e+07	8.81068e+07	8.75433e+07	3.22828e+07
TRUE	High	Master Protein	O75643	U5 small nuclear ribonucleoprotein 200 kDa helicase OS=Homo sapiens OX=9606 GN=SNRNP200 PE=1 SV=2	39	SNRNP200	9.72235e+07	9.33419e+07	4.61269e+07	8.04146e+07	7.82928e+07	9.12567e+07	4.87218e+07	4.41935e+07	3.88552e+07	7.9664e+07	4.9538e+07	2.8793e+07	3.89875e+07	2.46174e+07	5.09979e+07	1.81534e+08	1.77555e+08	2.77322e+07	1.4529e+07	6.96355e+06	9.5182e+07	6.96166e+07	1.34608e+08	2.14461e+07	1.81328e+08	3.38593e+07	4.71969e+07	3.60723e+07	9.07643e+07	3.01222e+07	2.70213e+07
TRUE	High	Master Protein	Q3BDU5	Prelamin-A/C OS=Homo sapiens OX=9606 GN=LMNA PE=1 SV=1	4	LMNA	3.13207e+07	1.96498e+07	8.48997e+06	4.07471e+07	1.07781e+07	1.78113e+07	47098.1	8.28633e+06	1.12377e+07	2.70275e+07	4.06463e+07	2.36127e+06	3.01425e+07	3.11207e+06	5.88757e+06	6.52272e+06	5525.34	9.39827e+06	933083	5.52675e+06	1.80359e+06	2.21995e+07	124720	143133	36562.7	211350	169057	138290	139979	5.45681e+06	182050
TRUE	High	Master Protein	Q00839	Heterogeneous nuclear ribonucleoprotein U OS=Homo sapiens OX=9606 GN=HNRNPU PE=1 SV=6	30	HNRNPU	8.86479e+08	4.84123e+08	2.26836e+08	5.89156e+08	3.55745e+08	4.70689e+08	2.16539e+08	2.16939e+08	3.33279e+08	5.41464e+08	2.18786e+08	1.7495e+08	2.27467e+08	1.03653e+08	2.09756e+08	3.245e+08	2.31958e+08	1.32537e+08	8.30967e+07	3.22064e+07	7.47166e+08	3.38508e+08	1.83955e+08	2.03919e+08	9.4815e+07	2.29038e+08	1.28949e+08	1.28621e+08	3.89831e+08	3.10413e+08	5.15428e+08
TRUE	High	Master Protein	P78559	Microtubule-associated protein 1A OS=Homo sapiens OX=9606 GN=MAP1A PE=1 SV=6	36	MAP1A	6.49687e+07	5.85027e+07	4.49347e+07	1.34994e+08	7.31081e+07	1.65302e+08	3.73352e+07	3.16996e+07	4.75866e+07	1.3206e+08	4.9147e+07	2.17511e+07	2.58712e+07	1.05556e+07	4.48503e+07	4.97589e+07	4.61008e+07	2.1918e+07	1.61933e+07	6.60906e+06	7.80978e+07	3.99112e+07	6.80524e+07	5.40547e+07	5.0335e+07	6.86054e+07	1.47157e+08	6.57458e+07	5.71144e+07	6.3388e+07	7.17949e+07
TRUE	High	Master Protein	A0A1C7CYX9	Dihydropyrimidinase-related protein 2 OS=Homo sapiens OX=9606 GN=DPYSL2 PE=1 SV=1	8	DPYSL2	1.05534e+09	8.49919e+08	6.01287e+08	1.01473e+09	1.10165e+09	1.15796e+09	5.6966e+08	4.27886e+08	8.79333e+08	1.21006e+09	7.03783e+08	2.69855e+08	6.2174e+08	2.74788e+08	9.46701e+08	1.39421e+09	6.3107e+08	6.43315e+08	1.52014e+08	1.44975e+08	4.7675e+08	7.72251e+08	1.581e+08	3.37419e+08	4.63138e+08	9.84806e+08	2.06357e+09	7.52972e+08	7.84116e+08	8.6876e+08	6.15929e+08
TRUE	High	Master Protein	P02774	Vitamin D-binding protein OS=Homo sapiens OX=9606 GN=GC PE=1 SV=1	2	GC	7.56035e+07	1.11026e+08	1.0623e+08	9.63326e+07	1.96033e+08	1.14959e+08	1.71362e+08	2.2784e+08	1.46431e+08	5.14744e+07	1.35008e+08	1.53203e+08	2.11872e+08	5.20705e+08	1.33985e+08	1.01011e+08	1.30406e+08	5.9888e+08	2.83571e+08	4.67926e+08	2.5609e+08	1.44583e+08	2.6563e+08	1.4659e+08	2.16985e+08	1.22184e+08	1.86509e+08	1.61997e+08	2.0086e+08	2.73716e+08	1.40627e+08
TRUE	High	Master Protein	P04264	Keratin, type II cytoskeletal 1 OS=Homo sapiens OX=9606 GN=KRT1 PE=1 SV=6	26	KRT1	2.18452e+08	2.04298e+08	7.91293e+08	1.08201e+08	1.40512e+08	1.53669e+08	9.41792e+07	1.89718e+08	1.42715e+08	1.81021e+08	2.44129e+08	6.00623e+07	7.9662e+07	1.50854e+08	2.69884e+08	3.3937e+08	1.45025e+08	2.01601e+08	1.17617e+08	2.12284e+08	1.3907e+09	1.92579e+08	3.26613e+08	1.64641e+08	4.65469e+08	2.21306e+08	4.82472e+08	3.29346e+08	2.62412e+08	1.85561e+08	6.80771e+08
TRUE	High	Master Protein	P14866	Heterogeneous nuclear ribonucleoprotein L OS=Homo sapiens OX=9606 GN=HNRNPL PE=1 SV=2	21	HNRNPL	3.43561e+08	2.28739e+08	2.09039e+08	3.67185e+08	2.17565e+08	2.56449e+08	9.57147e+07	1.49359e+08	1.68308e+08	3.06731e+08	9.21369e+07	4.07298e+07	9.21721e+07	4.632e+07	1.14737e+08	1.08842e+08	1.2115e+08	6.8499e+07	2.62336e+07	1.25185e+08	1.58574e+08	3.34563e+08	6.74032e+06	2.44152e+06	2.29442e+07	4.55603e+07	2.43605e+07	2.93519e+07	9.99082e+07	8.9681e+07	1.15815e+08
TRUE	High	Master Protein	P49588	Alanine--tRNA ligase, cytoplasmic OS=Homo sapiens OX=9606 GN=AARS PE=1 SV=2	30	AARS	1.76384e+08	1.83227e+08	1.39196e+08	2.76932e+08	1.47792e+08	2.3731e+08	1.07842e+08	1.39133e+08	2.2358e+08	2.82507e+08	1.28382e+08	6.89747e+07	8.08303e+07	1.36255e+07	1.62463e+08	1.58646e+08	5.02447e+07	4.57511e+07	2.09661e+07	2.61764e+07	1.45104e+08	2.57946e+08	1.3598e+08	3.45131e+07	1.78897e+07	3.6946e+07	2.5995e+07	3.93163e+07	9.84297e+07	5.77063e+07	5.69947e+07
TRUE	High	Master Protein	P31939	Bifunctional purine biosynthesis protein PURH OS=Homo sapiens OX=9606 GN=ATIC PE=1 SV=3	31	ATIC	2.31845e+08	2.81141e+08	4.05171e+08	3.59903e+08	2.03821e+08	2.17876e+08	2.07177e+08	2.43027e+08	4.73847e+08	2.69603e+08	3.98303e+08	1.99633e+08	1.50485e+08	6.08119e+07	2.88528e+08	1.86194e+08	1.33853e+08	8.76929e+07	6.97913e+07	3.7761e+07	2.5479e+08	2.1019e+08	1.61389e+08	3.08707e+07	5.1966e+07	1.04714e+08	9.92023e+07	1.11611e+08	3.70023e+08	1.31058e+08	1.86097e+08
TRUE	High	Master Protein	P55786	Puromycin-sensitive aminopeptidase OS=Homo sapiens OX=9606 GN=NPEPPS PE=1 SV=2	35	NPEPPS	2.19003e+08	3.55593e+08	3.25487e+08	3.23129e+08	2.27082e+08	2.1651e+08	2.9023e+08	2.26455e+08	3.44515e+08	2.46892e+08	3.67897e+08	3.57437e+08	1.7571e+08	1.01488e+08	4.6748e+08	4.91219e+08	1.44828e+08	1.967e+08	6.82173e+07	6.00107e+07	3.67232e+08	2.63325e+08	3.10447e+08	3.29827e+08	8.84117e+07	3.03908e+08	3.9803e+08	2.04586e+08	3.54469e+08	2.32766e+08	3.10545e+08
TRUE	High	Master Protein	Q7Z406	Myosin-14 OS=Homo sapiens OX=9606 GN=MYH14 PE=1 SV=2	18	MYH14	3.28758e+07	4.18838e+07	1.44616e+08	2.10644e+07	2.58974e+07	1.4629e+07	1.52516e+07	2.64831e+07	3.62691e+07	3.14212e+07	2.51355e+07	1.5397e+07	1.16281e+08	1.57514e+07	1.28218e+07	2.88952e+07	3.35739e+07	3.17847e+07	6.73001e+07	1.56779e+07	4.39654e+07	2.55572e+07	2.27045e+07	4.88861e+07	2.48509e+07	2.49551e+07	2.30713e+07	1.96956e+07	2.95155e+07	3.06189e+07	8.92526e+06
TRUE	High	Master Protein	Q8N2S1	Latent-transforming growth factor beta-binding protein 4 OS=Homo sapiens OX=9606 GN=LTBP4 PE=1 SV=2	31	LTBP4	3.79781e+08	4.41472e+07	2.34968e+07	3.98753e+07	2.37035e+07	7.35912e+07	3.80363e+07	5.57272e+07	3.87117e+07	1.28586e+08	4.53713e+07	3.62827e+07	4.39149e+07	1.54857e+07	7.3458e+07	4.26124e+07	6.25926e+07	3.84757e+07	1.95455e+07	2.50873e+07	6.45265e+07	7.59039e+07	4.50075e+08	2.54165e+08	9.62567e+06	2.64352e+07	4.02595e+06	2.7454e+07	1.33589e+07	7.38355e+07	4.08592e+07
TRUE	High	Master Protein	P20810	Calpastatin OS=Homo sapiens OX=9606 GN=CAST PE=1 SV=4	2	CAST	1.00918e+08	1.03842e+08	7.04181e+07	1.35626e+08	1.1517e+08	1.51253e+08	1.7092e+08	9.47973e+07	1.1589e+08	1.1215e+08	2.59214e+07	2.84819e+07	4.82755e+07	2.4856e+07	7.32585e+07	3.07637e+07	5.02027e+07	3.20956e+07	2.25023e+07	2.61368e+07	3.69796e+07	9.09984e+07	7.07734e+06	6.91489e+06	2.46273e+07	2.30029e+07	7.72768e+06	4.06004e+07	8.6542e+07	7.36876e+07	9.00317e+07
TRUE	High	Master Protein	P07384	Calpain-1 catalytic subunit OS=Homo sapiens OX=9606 GN=CAPN1 PE=1 SV=1	33	CAPN1	1.79312e+08	2.69882e+08	1.78457e+08	2.35457e+08	1.62003e+08	1.20325e+08	1.20146e+08	1.33239e+08	2.50506e+08	2.03104e+08	1.98626e+08	1.78348e+08	2.1e+08	9.14745e+07	2.59327e+08	1.59455e+08	3.14977e+08	1.17631e+08	4.16728e+07	5.53347e+07	2.88378e+08	2.63068e+08	8.38976e+08	5.42329e+07	1.12831e+08	1.16611e+08	8.91316e+07	1.33361e+08	3.033e+08	1.18809e+08	2.16246e+08
TRUE	High	Master Protein	P31040	Succinate dehydrogenase [ubiquinone] flavoprotein subunit, mitochondrial OS=Homo sapiens OX=9606 GN=SDHA PE=1 SV=2	21	SDHA	2.95584e+08	2.15789e+08	7.0843e+07	2.6489e+08	1.64075e+08	2.70032e+08	1.64869e+08	1.46083e+08	1.02806e+08	2.00662e+08	1.40089e+08	1.46072e+08	1.09707e+08	4.68387e+07	1.44436e+08	2.0665e+08	1.45257e+08	6.55222e+07	2.69516e+07	1.70023e+07	2.14595e+08	2.03976e+08	1.55005e+08	2.4865e+08	1.40753e+08	2.16765e+08	2.28145e+08	2.00742e+08	1.68745e+08	1.30109e+08	1.4263e+08
TRUE	High	Master Protein	Q99497	Protein/nucleic acid deglycase DJ-1 OS=Homo sapiens OX=9606 GN=PARK7 PE=1 SV=2	19	PARK7	3.78328e+08	7.87831e+08	4.62408e+08	4.85492e+08	6.23639e+08	5.73971e+08	4.09683e+08	2.87673e+08	6.15473e+08	5.60807e+08	2.89918e+08	2.97529e+08	3.41425e+08	2.55379e+08	3.12488e+08	7.39438e+08	4.80855e+08	2.75469e+08	1.20468e+08	1.22052e+08	2.75485e+08	4.85227e+08	2.79507e+08	8.82133e+08	2.86765e+08	4.06356e+08	3.30681e+08	3.83808e+08	5.27712e+08	4.04638e+08	4.52196e+08
TRUE	High	Master Protein	P45974	Ubiquitin carboxyl-terminal hydrolase 5 OS=Homo sapiens OX=9606 GN=USP5 PE=1 SV=2	28	USP5	1.79148e+08	1.36448e+08	1.31261e+08	1.75722e+08	1.3403e+08	1.74522e+08	1.05258e+08	9.71103e+07	6.23237e+08	1.91301e+08	2.05405e+08	1.39324e+08	4.89323e+07	1.39618e+08	8.01937e+07	1.75293e+08	6.44854e+07	5.45143e+07	4.40666e+07	5.07819e+07	1.60124e+08	2.47593e+08	1.08179e+08	3.63401e+07	2.57044e+07	5.71453e+07	6.64295e+07	6.2424e+07	1.73694e+08	8.11373e+07	8.47441e+07
TRUE	High	Master Protein	Q9Y6N5	Sulfide:quinone oxidoreductase, mitochondrial OS=Homo sapiens OX=9606 GN=SQOR PE=1 SV=1	25	SQRDL; SQOR	2.10328e+08	1.19807e+08	6.80548e+07	4.44189e+08	7.21539e+07	2.72834e+08	8.27034e+07	1.09326e+08	1.54089e+08	1.43152e+08	1.34977e+08	1.15237e+08	7.86365e+07	2.12448e+07	8.44779e+07	1.72865e+08	1.11263e+08	5.45324e+07	2.6111e+07	1.22776e+07	2.52536e+08	8.03172e+07	1.08675e+08	7.11684e+07	3.46956e+08	1.3712e+08	1.32644e+08	1.17941e+08	2.24664e+08	6.42946e+07	7.17832e+07
TRUE	High	Master Protein	Q9BSJ8	Extended synaptotagmin-1 OS=Homo sapiens OX=9606 GN=ESYT1 PE=1 SV=1	31	ESYT1	2.15615e+08	2.09964e+08	1.2513e+08	2.48127e+08	9.97338e+07	2.03747e+08	8.76012e+07	9.89161e+07	1.888e+08	1.48903e+08	1.84797e+08	6.85843e+07	5.41569e+07	2.70047e+07	8.67705e+07	1.0773e+08	6.88481e+07	3.60875e+07	1.71291e+07	4.1357e+07	1.5054e+08	2.00268e+08	1.70318e+08	2.62256e+07	3.62219e+07	1.02822e+08	6.1622e+07	7.27856e+07	1.0815e+08	7.78423e+07	1.37895e+08
TRUE	High	Master Protein	Q96KP4	Cytosolic non-specific dipeptidase OS=Homo sapiens OX=9606 GN=CNDP2 PE=1 SV=2	26	CNDP2	1.24974e+08	1.51031e+08	1.43347e+08	3.09852e+08	1.68324e+08	1.64597e+08	3.0441e+08	1.94458e+08	1.50276e+08	1.87476e+08	9.04628e+07	8.57499e+07	7.80059e+07	4.51059e+07	8.711e+07	1.70233e+08	1.26859e+08	6.09391e+07	4.0871e+07	3.98855e+07	1.44536e+08	2.01244e+08	4.6536e+07	6.25754e+07	6.82483e+07	1.26469e+08	8.97557e+07	1.13026e+08	1.69823e+08	1.43125e+08	1.40136e+08
TRUE	High	Master Protein	P04843	Dolichyl-diphosphooligosaccharide--protein glycosyltransferase subunit 1 OS=Homo sapiens OX=9606 GN=RPN1 PE=1 SV=1	27	RPN1	3.93209e+08	4.61419e+08	2.88622e+08	4.83164e+08	2.21877e+08	5.10743e+08	2.58892e+08	2.63419e+08	2.70193e+08	4.11919e+08	2.93256e+08	1.20903e+08	1.276e+08	4.97067e+07	2.44802e+08	2.28793e+08	1.27115e+08	8.2113e+07	5.55985e+07	3.5715e+07	4.18732e+08	4.06208e+08	2.12045e+08	8.15758e+07	6.09319e+07	2.01118e+08	7.94482e+07	1.69949e+08	2.64442e+08	1.64899e+08	3.69314e+08
TRUE	High	Master Protein	P28838	Cytosol aminopeptidase OS=Homo sapiens OX=9606 GN=LAP3 PE=1 SV=3	28	LAP3	3.02194e+08	3.18761e+08	1.9797e+08	6.27852e+08	2.46591e+08	3.47405e+08	2.70115e+08	1.9121e+08	3.58333e+08	5.28065e+08	2.31186e+08	3.46172e+08	2.67307e+08	2.24671e+08	2.6262e+08	4.08524e+08	1.96919e+08	1.841e+08	1.21206e+08	4.54354e+07	2.62313e+08	5.84554e+08	2.92457e+08	1.03279e+08	1.00847e+08	1.99158e+08	9.60873e+07	1.82245e+08	2.7286e+08	2.16854e+08	2.16695e+08
TRUE	High	Master Protein	Q05682	Caldesmon OS=Homo sapiens OX=9606 GN=CALD1 PE=1 SV=3	4	CALD1	3.23325e+08	3.42569e+08	7.31201e+07	4.15928e+08	7.08973e+08	2.11538e+08	1.86076e+08	1.9878e+08	6.80695e+08	3.85683e+08	1.29683e+08	3.01781e+07	3.15893e+08	2.04188e+08	1.14208e+08	5.10415e+08	7.74236e+07	7.87175e+07	7.93659e+07	3.74533e+07	3.19253e+08	2.77572e+08	2.07253e+08	1.4461e+08	1.12017e+08	2.56181e+08	2.46459e+08	2.46976e+08	2.1762e+08	2.08018e+08	3.32371e+08
TRUE	High	Master Protein	P51991	Heterogeneous nuclear ribonucleoprotein A3 OS=Homo sapiens OX=9606 GN=HNRNPA3 PE=1 SV=2	24	HNRNPA3	9.81787e+08	8.01851e+08	3.35211e+08	1.0609e+09	4.33795e+08	8.54669e+08	3.69664e+08	3.6677e+08	5.03187e+08	8.59914e+08	3.04007e+08	1.80127e+08	3.43628e+08	1.28629e+08	5.16836e+08	6.41368e+08	2.79472e+08	1.81095e+08	9.71479e+07	6.05346e+07	7.62238e+08	9.68954e+08	6.19375e+07	1.7145e+08	1.26064e+08	2.16917e+08	8.00468e+07	8.68421e+07	3.57407e+08	1.53099e+08	2.27316e+08
TRUE	High	Master Protein	Q9Y678	Coatomer subunit gamma-1 OS=Homo sapiens OX=9606 GN=COPG1 PE=1 SV=1	30	COPG1	1.63192e+08	1.33079e+08	1.1665e+08	2.00603e+08	5.09908e+07	1.13202e+08	6.40819e+07	7.99603e+07	1.27271e+08	1.30558e+08	8.55421e+07	8.68775e+07	4.07159e+07	2.4453e+07	9.81077e+07	1.87532e+08	8.28835e+07	2.84512e+07	2.41611e+07	1.39457e+07	1.87184e+08	1.61173e+08	4.89132e+07	6.08808e+07	1.41792e+07	1.24639e+07	1.26283e+08	1.63834e+07	7.00142e+07	4.66317e+07	1.04893e+08
TRUE	High	Master Protein	A0A024R6I7	Alpha-1-antitrypsin OS=Homo sapiens OX=9606 GN=SERPINA1 PE=1 SV=1	9	SERPINA1	1.21775e+06	1.80872e+06	1.07279e+06	848758	1.80516e+06	740258	1.33588e+06	3.82213e+06	1.53709e+07	765229	8.03405e+06	1.16648e+06	3.49587e+06	4.18403e+07	1.98591e+06	1.02724e+06	5.73819e+06	2.9151e+06	4.84924e+07	7.42604e+06	1.61658e+06	2.67883e+06	1.17232e+07	3.37585e+08	3.16649e+06	6.47732e+06	3.7504e+07	5.21598e+06	1.7145e+06	1.43332e+06	2.98093e+07
TRUE	High	Master Protein	Q13740	CD166 antigen OS=Homo sapiens OX=9606 GN=ALCAM PE=1 SV=2	25	ALCAM	2.25697e+08	6.43713e+08	1.60366e+08	7.09505e+08	2.03608e+08	2.88686e+08	1.65918e+08	4.55906e+08	4.51744e+08	8.83989e+08	8.00771e+07	1.87799e+08	4.20579e+08	3.18355e+07	3.75454e+08	4.20904e+07	9.20739e+07	9.049e+07	1.36703e+07	2.65201e+07	3.65098e+08	3.37035e+08	7.04547e+08	1.51119e+08	1.36433e+08	2.13977e+08	8.28176e+07	2.00015e+08	5.42243e+08	1.39364e+08	3.12433e+08
TRUE	High	Master Protein	Q9NY15	Stabilin-1 OS=Homo sapiens OX=9606 GN=STAB1 PE=1 SV=3	36	STAB1	4.85979e+07	2.11808e+07	2.31233e+07	2.01584e+08	1.02937e+07	9.66317e+07	2.43458e+07	2.40638e+07	4.2227e+07	7.7367e+07	3.84114e+07	2.89247e+07	2.58717e+07	2.44682e+07	2.25564e+07	5.06783e+07	1.16322e+08	1.71072e+07	5.92712e+07	7.76258e+06	7.21576e+07	1.12276e+08	3.38812e+07	1.82014e+07	7.49865e+06	4.02384e+07	3.11946e+07	5.44388e+07	3.43226e+07	2.23714e+07	3.91337e+07
TRUE	High	Master Protein	P38646	Stress-70 protein, mitochondrial OS=Homo sapiens OX=9606 GN=HSPA9 PE=1 SV=2	28	HSPA9	4.83904e+08	3.77919e+08	1.94335e+08	6.54375e+08	4.09816e+08	7.04536e+08	4.11926e+08	3.16059e+08	2.24141e+08	3.73502e+08	2.43565e+08	3.42331e+08	1.71011e+08	1.25358e+08	3.89497e+08	4.24673e+08	7.22614e+08	1.85781e+08	7.64599e+07	4.20464e+07	6.37435e+08	7.94039e+08	3.19194e+08	8.40059e+07	1.19141e+08	2.72034e+08	1.68678e+08	2.31125e+08	4.29215e+08	2.21915e+08	3.80287e+08
TRUE	High	Master Protein	P20700	Lamin-B1 OS=Homo sapiens OX=9606 GN=LMNB1 PE=1 SV=2	30	LMNB1	3.37e+08	3.48922e+08	1.88784e+08	3.20618e+08	1.28611e+08	2.33616e+08	2.32137e+08	2.08075e+08	1.86967e+08	3.47234e+08	2.33029e+08	1.10815e+08	1.16935e+08	6.57941e+07	2.7807e+08	5.70979e+08	1.93025e+08	2.02392e+08	5.15e+07	4.37463e+07	4.54807e+08	4.43633e+08	8.19838e+08	8.82354e+07	5.6743e+07	2.08234e+08	5.99868e+07	7.5933e+07	3.00713e+08	9.088e+07	2.0065e+08
TRUE	High	Master Protein	P13667	Protein disulfide-isomerase A4 OS=Homo sapiens OX=9606 GN=PDIA4 PE=1 SV=2	32	PDIA4	4.56476e+08	4.79311e+08	2.14145e+08	5.14282e+08	2.19119e+08	3.4461e+08	1.5747e+08	1.57101e+08	4.92723e+08	3.50388e+08	3.39578e+08	3.88145e+08	2.33501e+08	1.42105e+08	4.06554e+08	1.12384e+09	1.91584e+08	1.34726e+08	9.22082e+07	4.44947e+07	6.18898e+08	3.62887e+08	1.53635e+08	2.60208e+08	4.77847e+07	1.43284e+08	1.06314e+08	1.7903e+08	2.68627e+08	2.4087e+08	2.77621e+08
TRUE	High	Master Protein	P09960	Leukotriene A-4 hydrolase OS=Homo sapiens OX=9606 GN=LTA4H PE=1 SV=2	24	LTA4H	1.32643e+08	2.45952e+08	1.83733e+08	3.23229e+08	1.71066e+08	2.13004e+08	9.00157e+07	1.35407e+08	1.641e+08	1.73717e+08	2.71745e+08	3.01196e+08	5.1303e+07	4.31202e+07	1.28377e+08	2.67423e+08	1.18706e+08	1.29281e+08	6.35792e+08	1.65396e+08	1.58111e+08	1.09438e+08	1.48124e+08	6.25077e+07	1.31681e+08	2.02659e+08	5.08571e+08	1.30115e+08	4.5984e+08	7.63567e+07	7.1295e+07
TRUE	High	Master Protein	P61978	Heterogeneous nuclear ribonucleoprotein K OS=Homo sapiens OX=9606 GN=HNRNPK PE=1 SV=1	6	HNRNPK	1.00599e+09	1.18985e+09	3.78338e+08	1.42472e+09	4.95984e+08	9.29029e+08	4.13319e+08	4.92178e+08	5.56863e+08	9.12612e+08	5.62939e+08	6.09808e+08	4.42895e+08	1.89161e+08	7.4464e+08	1.00709e+09	4.12083e+08	2.87031e+08	6.33841e+07	7.28277e+07	1.16485e+09	6.86806e+08	3.04352e+08	1.33159e+08	1.44081e+08	3.74514e+08	2.06152e+08	1.72151e+08	6.32411e+08	6.16923e+08	7.50046e+08
TRUE	High	Master Protein	P46459	Vesicle-fusing ATPase OS=Homo sapiens OX=9606 GN=NSF PE=1 SV=3	37	NSF	1.21015e+08	1.73616e+08	1.41399e+08	3.20939e+08	2.02099e+08	2.67457e+08	1.50121e+08	1.3093e+08	2.58696e+08	3.33769e+08	1.47605e+08	1.3224e+08	1.72304e+08	6.77881e+07	1.95598e+08	1.12676e+09	1.46936e+08	1.13525e+08	1.83987e+08	2.77627e+07	2.83336e+08	2.03864e+08	1.43143e+09	4.93164e+08	2.43194e+08	3.48189e+08	1.02421e+09	3.00338e+08	3.28511e+08	4.70619e+08	3.65976e+08
TRUE	High	Master Protein	P33176	Kinesin-1 heavy chain OS=Homo sapiens OX=9606 GN=KIF5B PE=1 SV=1	26	KIF5B	1.17238e+08	1.26058e+08	1.02377e+08	2.38571e+08	1.20567e+08	1.3822e+08	1.64935e+08	1.26093e+08	1.9729e+08	2.35422e+08	1.67065e+08	1.30739e+08	4.81992e+07	2.55306e+08	6.71385e+07	1.28149e+08	6.77668e+07	6.47611e+07	4.48471e+07	1.18272e+07	1.33486e+08	2.30765e+08	1.08528e+08	9.59375e+07	7.85844e+07	1.95724e+08	8.11971e+07	1.26259e+08	1.80638e+08	1.39534e+08	1.77805e+08
TRUE	High	Master Protein	Q15084	Protein disulfide-isomerase A6 OS=Homo sapiens OX=9606 GN=PDIA6 PE=1 SV=1	21	PDIA6	3.09354e+08	3.85255e+08	2.19892e+08	4.90338e+08	2.2733e+08	3.44228e+08	2.38818e+08	2.18827e+08	3.13146e+08	3.07523e+08	3.74078e+08	2.04273e+08	2.24672e+08	1.11241e+08	2.37298e+08	5.21906e+08	2.60928e+08	1.14263e+08	1.50974e+08	3.33394e+07	4.90127e+08	3.238e+08	1.77345e+08	6.27749e+07	4.68596e+07	1.50437e+08	4.161e+07	1.86875e+08	1.5938e+08	1.91474e+08	1.40066e+08
TRUE	High	Master Protein	P27695	DNA-(apurinic or apyrimidinic site) lyase OS=Homo sapiens OX=9606 GN=APEX1 PE=1 SV=2	19	APEX1	3.22021e+08	4.27671e+08	1.66142e+08	4.9568e+08	2.31652e+08	2.42715e+08	5.61077e+07	1.61705e+08	2.78703e+08	2.47847e+08	1.91895e+08	2.43686e+08	1.13645e+08	3.73846e+07	2.61765e+08	3.21788e+08	1.43391e+08	1.42958e+08	5.66183e+07	3.20516e+07	3.43742e+08	3.25022e+08	1.11901e+08	1.23639e+07	2.44945e+08	9.61573e+07	7.21058e+07	5.81517e+07	9.58282e+07	8.43096e+07	1.68202e+08
TRUE	High	Master Protein	P30153	Serine/threonine-protein phosphatase 2A 65 kDa regulatory subunit A alpha isoform OS=Homo sapiens OX=9606 GN=PPP2R1A PE=1 SV=4	18	PPP2R1A	2.50771e+08	3.23624e+08	2.15335e+08	3.71146e+08	2.90248e+08	2.84619e+08	2.56182e+08	1.9881e+08	3.61699e+08	2.69725e+08	3.02308e+08	1.19442e+08	9.93928e+07	4.00638e+07	1.69192e+08	2.6e+08	1.92944e+08	6.9921e+07	3.86562e+07	9.66895e+07	2.48357e+08	3.47896e+08	1.40994e+08	8.98583e+06	7.85077e+07	1.57999e+08	1.79655e+08	9.69048e+07	2.35672e+08	1.13556e+08	2.52951e+08
TRUE	High	Master Protein	P55011	Solute carrier family 12 member 2 OS=Homo sapiens OX=9606 GN=SLC12A2 PE=1 SV=1	26	SLC12A2	3.47585e+07	2.79363e+08	2.68605e+08	2.17845e+08	4.9553e+08	4.36743e+08	3.41735e+08	6.70028e+08	3.26304e+08	2.50812e+08	1.23543e+09	1.68075e+08	2.03893e+08	4.13306e+07	1.23631e+08	7.24163e+08	5.87242e+07	1.06112e+08	2.60617e+07	9.92342e+06	1.23345e+08	7.46917e+07	2.01418e+07	8.66404e+07	1.99329e+07	4.02002e+07	3.23187e+07	3.19775e+07	9.09364e+08	2.36976e+07	1.77888e+07
TRUE	High	Master Protein	Q06830	Peroxiredoxin-1 OS=Homo sapiens OX=9606 GN=PRDX1 PE=1 SV=1	17	PRDX1	4.39115e+08	1.28917e+09	5.57755e+08	9.67261e+08	1.40612e+09	8.01609e+08	8.35713e+08	8.96053e+08	9.81375e+08	7.5351e+08	1.68366e+09	1.75276e+09	1.79312e+09	5.53159e+08	1.23662e+09	1.64284e+09	1.34636e+09	8.57746e+08	3.57939e+08	2.55565e+08	6.16224e+08	7.99597e+08	2.13809e+09	6.64752e+08	6.69007e+08	1.35733e+09	1.29945e+09	1.46928e+09	1.24359e+09	1.20462e+09	1.70458e+09
TRUE	High	Master Protein	Q16531	DNA damage-binding protein 1 OS=Homo sapiens OX=9606 GN=DDB1 PE=1 SV=1	29	DDB1	1.34127e+08	1.59482e+08	5.94646e+07	1.89354e+08	7.27702e+07	1.22835e+08	8.0766e+07	8.88801e+07	1.22309e+08	1.41139e+08	1.09914e+08	1.32529e+08	1.02602e+08	8.31829e+07	1.4002e+08	2.24955e+08	2.08645e+08	7.37539e+07	8.96737e+07	7.07085e+07	2.0368e+08	1.66186e+08	5.97941e+08	5.03709e+07	3.06222e+07	1.12691e+08	1.15462e+08	8.5054e+07	2.24195e+08	1.17511e+08	1.97818e+08
TRUE	High	Master Protein	P17858	ATP-dependent 6-phosphofructokinase, liver type OS=Homo sapiens OX=9606 GN=PFKL PE=1 SV=6	22	PFKL	1.85897e+08	2.31231e+08	1.21768e+08	1.95403e+08	1.45083e+08	1.52644e+08	3.4485e+08	2.01376e+08	1.77117e+08	1.57959e+08	2.01775e+08	1.31176e+08	1.29596e+08	2.93754e+08	1.77614e+08	1.95598e+08	1.55667e+09	1.04509e+08	9.8247e+08	4.29422e+07	1.83303e+08	2.26582e+09	1.28552e+08	6.32369e+07	3.82012e+08	6.0524e+08	1.34673e+08	3.80517e+08	2.51466e+08	3.2413e+08	1.38375e+08
TRUE	High	Master Protein	P00488	Coagulation factor XIII A chain OS=Homo sapiens OX=9606 GN=F13A1 PE=1 SV=4	24	F13A1	1.28634e+08	3.99328e+07	2.18589e+08	4.40553e+08	1.07812e+08	2.14566e+08	3.22867e+08	3.15524e+08	1.77075e+08	2.38614e+08	2.21496e+08	6.01438e+07	1.35591e+08	9.58166e+07	5.72035e+07	1.13999e+08	6.56053e+07	5.34745e+07	1.00106e+08	6.49924e+07	1.15749e+08	3.79743e+08	1.74947e+08	2.69415e+08	1.92352e+08	3.38126e+08	7.82387e+07	9.65662e+08	1.02027e+08	1.17229e+08	4.11711e+08
TRUE	High	Master Protein	Q9NZB2	Constitutive coactivator of PPAR-gamma-like protein 1 OS=Homo sapiens OX=9606 GN=FAM120A PE=1 SV=2	26	FAM120A	1.3048e+08	9.62946e+07	6.07591e+07	2.01835e+08	6.55729e+07	8.4694e+07	5.71146e+07	6.79424e+07	9.94002e+07	1.33068e+08	1.34809e+08	5.48115e+07	3.71792e+07	6.39921e+07	1.29038e+08	1.26858e+08	1.04281e+08	3.55729e+07	7.68886e+07	2.25713e+07	1.61118e+08	1.33493e+08	1.26912e+08	4.84354e+07	2.73482e+08	8.55536e+08	1.53901e+08	9.85323e+08	3.46357e+08	1.25003e+09	2.77494e+08
TRUE	High	Master Protein	P30041	Peroxiredoxin-6 OS=Homo sapiens OX=9606 GN=PRDX6 PE=1 SV=3	23	PRDX6	6.96724e+08	7.24801e+08	8.29862e+08	1.31887e+09	9.35823e+08	7.12336e+08	7.60698e+08	5.04779e+08	5.84933e+08	8.11302e+08	6.11644e+08	5.86667e+08	4.94573e+08	2.20193e+08	5.14151e+08	2.23833e+09	6.78635e+08	4.95924e+08	2.07717e+08	3.87514e+08	1.42635e+09	6.60462e+08	6.63412e+08	1.49817e+08	4.48503e+08	4.01145e+08	6.05912e+08	6.63678e+08	2.33947e+09	5.76499e+08	7.66882e+08
TRUE	High	Master Protein	A0A0R4J2E8	Matrin-3 OS=Homo sapiens OX=9606 GN=MATR3 PE=1 SV=1	24	MATR3	2.65414e+08	2.22593e+08	1.05827e+08	3.12151e+08	1.14947e+08	2.83156e+08	1.09991e+08	1.3235e+08	1.54531e+08	2.48003e+08	1.28567e+08	9.79624e+07	1.31479e+08	2.11298e+08	2.39349e+08	2.81097e+08	3.33376e+08	7.57815e+07	6.20602e+08	6.9376e+07	2.87829e+08	2.39368e+08	4.12042e+07	1.27786e+08	2.07548e+07	5.38995e+07	4.7034e+07	5.77922e+07	1.20897e+08	1.07623e+08	8.62792e+07
TRUE	High	Master Protein	Q10567	AP-1 complex subunit beta-1 OS=Homo sapiens OX=9606 GN=AP1B1 PE=1 SV=2	13	AP1B1	2.98205e+07	4.05156e+07	2.60196e+07	6.39772e+07	3.67752e+07	3.67516e+07	2.48857e+07	1.89391e+07	3.1182e+07	3.06372e+07	4.73234e+07	3.30669e+07	1.93947e+07	1.50878e+07	3.43764e+07	5.88299e+07	1.6228e+07	1.84705e+07	6.30223e+06	5.00393e+06	2.3868e+07	2.50322e+07	1.21254e+08	2.50913e+07	1.83003e+08	1.74675e+08	1.36765e+08	1.52485e+08	1.68219e+08	9.83873e+07	2.9555e+07
TRUE	High	Master Protein	P01008	Antithrombin-III OS=Homo sapiens OX=9606 GN=SERPINC1 PE=1 SV=1	27	SERPINC1	5.63725e+07	4.51227e+07	6.09536e+08	6.80322e+07	2.27887e+09	2.80189e+08	2.9568e+09	1.70785e+08	5.42821e+07	6.85458e+07	3.71301e+09	6.93125e+07	3.74309e+08	2.30348e+08	8.2951e+07	7.34768e+07	1.05448e+08	2.70785e+08	1.66475e+08	2.6932e+08	1.69742e+08	3.35817e+07	1.86592e+08	7.49317e+07	1.63527e+08	1.08391e+08	1.72067e+08	1.00981e+08	5.9295e+07	1.57905e+08	1.95047e+08
TRUE	High	Master Protein	P53396	ATP-citrate synthase OS=Homo sapiens OX=9606 GN=ACLY PE=1 SV=3	32	ACLY	2.2867e+08	1.42977e+08	1.06705e+08	2.05075e+08	9.12098e+07	1.18144e+08	7.12279e+07	8.25393e+07	1.35314e+08	1.49866e+08	1.36625e+08	8.96275e+07	6.85291e+07	4.62883e+07	1.18241e+08	1.50043e+08	9.46605e+07	3.97211e+07	6.2955e+07	3.38733e+07	1.60254e+08	2.12722e+08	1.06316e+08	8.18867e+07	8.06412e+07	1.18827e+08	1.50549e+08	8.5781e+07	4.0063e+08	1.30295e+08	3.04049e+08
TRUE	High	Master Protein	Q9BXN1	Asporin OS=Homo sapiens OX=9606 GN=ASPN PE=1 SV=2	23	ASPN	4.36665e+08	3.37111e+07	5.08972e+07	5.37301e+07	4.49458e+07	3.49033e+07	3.38128e+08	4.90721e+08	4.41717e+07	4.57032e+07	2.80849e+07	1.02255e+08	6.46213e+08	9.64753e+08	2.85431e+08	6.47076e+07	3.17749e+08	1.09812e+09	3.78801e+08	9.13392e+08	2.36179e+08	3.27552e+07	1.96067e+09	1.17989e+08	1.00405e+08	1.38323e+08	1.45329e+08	1.38514e+08	7.83118e+07	7.03099e+07	3.83452e+07
TRUE	High	Master Protein	P16615	Sarcoplasmic/endoplasmic reticulum calcium ATPase 2 OS=Homo sapiens OX=9606 GN=ATP2A2 PE=1 SV=1	27	ATP2A2	1.8454e+08	1.34431e+08	6.89813e+07	1.96154e+08	1.73374e+08	2.61562e+08	1.09522e+08	1.24143e+08	1.47047e+08	1.57539e+08	1.37803e+08	1.00138e+08	3.79775e+07	5.45986e+07	7.69399e+07	1.37096e+08	1.61674e+08	6.47222e+07	3.61403e+07	4.86827e+07	2.33903e+08	2.7778e+08	5.28061e+07	5.60057e+07	4.78261e+07	4.5423e+07	5.10075e+07	5.35072e+07	5.42466e+07	4.05308e+07	6.97604e+07
TRUE	High	Master Protein	P07195	L-lactate dehydrogenase B chain OS=Homo sapiens OX=9606 GN=LDHB PE=1 SV=2	22	LDHB	5.36561e+08	1.15011e+09	5.45433e+08	1.88593e+09	1.23473e+09	8.97601e+08	5.94891e+08	7.20386e+08	1.49372e+09	1.07985e+09	4.92073e+08	5.19488e+08	4.80108e+08	7.5259e+08	1.11243e+09	7.79809e+08	5.63558e+08	5.01688e+08	9.27741e+07	1.62677e+08	5.94023e+08	1.55398e+09	6.71841e+08	3.7909e+08	4.85153e+08	6.03943e+08	1.29201e+09	5.45055e+08	1.95042e+09	4.58175e+08	2.10862e+09
TRUE	High	Master Protein	P55084	Trifunctional enzyme subunit beta, mitochondrial OS=Homo sapiens OX=9606 GN=HADHB PE=1 SV=3	26	HADHB	3.75862e+08	3.03612e+08	2.03913e+08	4.73705e+08	1.78761e+08	4.09748e+08	1.15453e+08	1.0929e+08	9.70554e+07	2.41928e+08	1.98405e+08	1.85354e+08	2.19782e+08	1.10117e+08	3.88967e+08	3.35528e+08	2.17632e+08	1.50177e+08	4.05697e+07	2.42258e+07	4.24995e+08	3.24922e+08	3.42235e+09	2.76147e+08	3.41804e+08	4.89355e+08	2.94572e+08	4.70774e+08	8.39113e+08	3.49496e+08	6.4855e+08
TRUE	High	Master Protein	P19367	Hexokinase-1 OS=Homo sapiens OX=9606 GN=HK1 PE=1 SV=3	32	HK1	1.36314e+08	8.33633e+07	6.01452e+07	1.82128e+08	1.87356e+08	1.16294e+08	5.18175e+07	7.40144e+07	1.44236e+08	1.30449e+08	1.8786e+08	1.1331e+08	6.59308e+07	9.8314e+07	8.0699e+07	3.45337e+08	1.49898e+08	6.86055e+07	6.18123e+07	9.94704e+07	9.1456e+07	1.29791e+08	3.61071e+08	2.06825e+08	1.98404e+08	3.63522e+08	9.73759e+08	2.89787e+08	3.43017e+08	2.05689e+08	1.26762e+08
TRUE	High	Master Protein	P48643	T-complex protein 1 subunit epsilon OS=Homo sapiens OX=9606 GN=CCT5 PE=1 SV=1	26	CCT5	1.93063e+08	2.08111e+08	1.08884e+08	1.88857e+08	1.69675e+08	2.02853e+08	1.22398e+08	9.49952e+07	1.38537e+08	1.89023e+08	1.13865e+08	7.94187e+07	1.14467e+08	5.79157e+07	9.84052e+07	1.31198e+08	9.75239e+07	9.90511e+07	2.84125e+07	3.2081e+07	1.33975e+08	2.09126e+08	1.46334e+08	1.568e+08	1.39048e+08	2.62741e+08	3.01742e+08	2.71278e+08	2.19163e+08	2.39084e+08	2.23122e+08
TRUE	High	Master Protein	P26599	Polypyrimidine tract-binding protein 1 OS=Homo sapiens OX=9606 GN=PTBP1 PE=1 SV=1	17	PTBP1	3.7211e+08	3.09003e+08	1.44283e+08	3.27207e+08	1.57766e+08	2.78176e+08	1.59837e+08	1.65435e+08	1.89658e+08	2.38207e+08	1.27618e+08	5.44353e+07	1.63932e+08	6.92862e+07	1.68569e+08	1.76049e+08	1.05925e+08	5.64573e+07	4.02416e+07	3.05861e+07	4.757e+08	1.78679e+08	1.4401e+07	3.8223e+06	4.3743e+07	1.11354e+08	4.36974e+07	9.43246e+07	2.01338e+08	1.81082e+08	1.03386e+08
TRUE	High	Master Protein	Q13200	26S proteasome non-ATPase regulatory subunit 2 OS=Homo sapiens OX=9606 GN=PSMD2 PE=1 SV=3	28	PSMD2	9.40873e+07	1.79486e+08	9.08453e+07	2.17379e+08	9.60982e+07	9.58804e+07	7.83091e+07	1.01942e+08	1.81407e+08	1.77242e+08	8.76507e+07	1.08586e+08	6.62854e+07	4.84633e+07	1.05343e+08	1.32898e+08	1.00943e+08	5.17528e+07	2.85561e+07	3.016e+07	1.36622e+08	1.89201e+08	9.5598e+08	9.03167e+07	9.7723e+07	1.93789e+08	1.86735e+08	1.49298e+08	3.55056e+08	1.54953e+08	2.82042e+08
TRUE	High	Master Protein	Q9H4A4	Aminopeptidase B OS=Homo sapiens OX=9606 GN=RNPEP PE=1 SV=2	28	RNPEP	1.94468e+08	1.96761e+08	1.99755e+08	3.27016e+08	1.21718e+08	1.26173e+08	1.0161e+08	1.46171e+08	2.67121e+08	1.58022e+08	2.02579e+08	1.45604e+08	1.09728e+08	5.11905e+07	1.22275e+08	2.17241e+08	1.19861e+08	7.46125e+07	4.562e+07	3.12154e+07	3.16871e+08	1.99609e+08	8.86908e+07	1.00503e+08	6.98989e+07	7.95029e+07	4.28163e+07	6.74383e+07	1.58452e+08	1.14767e+08	1.46924e+08
TRUE	High	Master Protein	O95782	AP-2 complex subunit alpha-1 OS=Homo sapiens OX=9606 GN=AP2A1 PE=1 SV=3	29	AP2A1	2.32071e+08	1.61902e+08	1.20609e+08	2.71359e+08	1.49282e+08	2.23359e+08	1.14632e+08	8.8129e+07	1.70845e+08	3.22486e+08	1.45731e+08	1.56377e+08	1.18944e+08	1.40565e+08	1.302e+08	3.58998e+08	1.24226e+08	7.44941e+07	1.96316e+08	1.88935e+07	4.67429e+08	1.90425e+08	3.50568e+08	8.62073e+07	9.98534e+07	3.35212e+08	6.54106e+08	1.7745e+08	2.60408e+08	1.49478e+08	2.40602e+08
TRUE	High	Master Protein	P00387	NADH-cytochrome b5 reductase 3 OS=Homo sapiens OX=9606 GN=CYB5R3 PE=1 SV=3	18	CYB5R3	3.53897e+08	3.77099e+08	1.7284e+08	2.6209e+08	2.77902e+08	2.93805e+08	6.68303e+08	3.05743e+08	3.15623e+08	1.86051e+08	3.27082e+08	7.07866e+07	8.75175e+07	6.85601e+08	1.2389e+08	6.20279e+07	1.07902e+08	8.80537e+07	1.2093e+09	2.13324e+07	1.24104e+08	1.5716e+08	4.10383e+08	1.65915e+08	1.29509e+08	2.32373e+08	1.69216e+08	2.33741e+08	4.35055e+08	1.29745e+08	2.61085e+08
TRUE	High	Master Protein	Q16891	MICOS complex subunit MIC60 OS=Homo sapiens OX=9606 GN=IMMT PE=1 SV=1	10	IMMT	1.99112e+08	2.01123e+08	8.93983e+07	2.50418e+08	1.33449e+08	1.82296e+08	2.71435e+08	1.24176e+08	1.27783e+08	1.08087e+08	1.44114e+08	9.70556e+07	1.18771e+08	4.66559e+07	1.19867e+08	1.7667e+08	1.19069e+08	5.99629e+07	5.11102e+07	1.50384e+07	2.49556e+08	2.04843e+08	7.3085e+07	3.61693e+07	6.79754e+07	1.86887e+08	1.72179e+08	1.8202e+08	2.4416e+08	1.25821e+08	1.85388e+08
TRUE	High	Master Protein	P52272	Heterogeneous nuclear ribonucleoprotein M OS=Homo sapiens OX=9606 GN=HNRNPM PE=1 SV=3	29	HNRNPM	4.57027e+08	2.80359e+08	1.29332e+08	3.28483e+08	1.28644e+08	3.09338e+08	1.79504e+08	1.70146e+08	2.02564e+08	3.05604e+08	1.9304e+08	9.51725e+07	1.89358e+08	7.65116e+07	2.48432e+08	4.18297e+08	1.40813e+08	8.79507e+07	6.27218e+07	3.69787e+07	3.4075e+08	2.32497e+08	1.12449e+08	1.49063e+07	1.0127e+08	1.99312e+08	8.11075e+07	1.53247e+08	2.55468e+08	2.31343e+08	1.64297e+08
TRUE	High	Master Protein	P19823	Inter-alpha-trypsin inhibitor heavy chain H2 OS=Homo sapiens OX=9606 GN=ITIH2 PE=1 SV=2	22	ITIH2	4.06953e+07	5.89776e+07	1.52594e+08	6.44701e+07	1.47063e+08	1.33854e+08	1.36995e+08	9.24852e+07	5.7448e+07	1.09216e+08	9.89493e+07	4.18201e+07	1.16691e+08	8.52497e+07	7.63402e+07	8.50128e+07	6.39923e+07	3.7394e+08	6.98021e+07	2.46471e+08	6.70515e+07	1.13492e+08	1.20765e+08	6.36956e+07	5.66559e+07	4.16569e+07	6.82719e+07	9.26331e+07	3.42349e+07	8.15035e+07	3.12054e+07
TRUE	High	Master Protein	P06744	Glucose-6-phosphate isomerase OS=Homo sapiens OX=9606 GN=GPI PE=1 SV=4	22	GPI	7.3492e+08	6.59035e+08	4.80261e+08	8.46545e+08	4.8967e+08	6.31509e+08	6.76824e+08	3.37615e+08	6.28154e+08	6.19829e+08	5.67961e+08	4.78259e+08	2.08582e+08	1.72741e+08	5.92971e+08	5.55063e+08	3.82416e+08	1.76314e+08	1.23299e+08	1.14938e+08	5.1992e+08	7.836e+08	2.1406e+08	2.97256e+07	1.50976e+08	3.24014e+08	5.48399e+08	3.91351e+08	8.44025e+08	4.82854e+08	9.7413e+08
TRUE	High	Master Protein	Q9UEY8	Gamma-adducin OS=Homo sapiens OX=9606 GN=ADD3 PE=1 SV=1	25	ADD3	3.26675e+08	4.94588e+08	1.93878e+08	3.10131e+08	1.76612e+08	3.36756e+08	1.74286e+08	1.9728e+08	3.42181e+08	2.99057e+08	2.42334e+08	7.79671e+07	2.12756e+08	6.5961e+07	1.32878e+08	8.66504e+07	1.52927e+08	9.00458e+07	5.10453e+07	6.25414e+07	1.68822e+08	3.2293e+08	1.36969e+09	1.8601e+08	1.86379e+08	1.72163e+08	1.0917e+08	1.13479e+08	6.91501e+08	2.8443e+08	1.76112e+08
TRUE	High	Master Protein	P19338	Nucleolin OS=Homo sapiens OX=9606 GN=NCL PE=1 SV=3	29	NCL	5.84127e+08	1.35318e+09	1.18026e+09	1.18275e+09	1.3158e+09	4.15648e+08	1.28861e+09	1.18961e+09	1.43174e+09	8.21638e+08	2.03423e+08	2.83334e+08	1.98292e+08	2.95236e+08	6.68672e+08	3.94483e+08	2.90559e+09	1.42736e+08	1.31843e+08	8.61621e+07	2.09326e+09	1.00341e+09	1.15614e+09	8.3091e+07	1.1422e+09	1.10946e+09	9.34917e+08	1.21133e+09	1.1277e+09	7.12456e+08	6.86901e+08
TRUE	High	Master Protein	H3BTN5	Pyruvate kinase (Fragment) OS=Homo sapiens OX=9606 GN=PKM PE=1 SV=1	3		2.02169e+06	5.80952e+06	4.67375e+06	7.07617e+06	2.45832e+07	1.02773e+07	3.56437e+07	3.06612e+07	8.96972e+06	1.16249e+07	2.35607e+07	8.07267e+06	3.78363e+07	196766	3.86333e+07	3.95454e+06	392320	8.0073e+06	1.00856e+07	771124	2.53712e+06	3.67117e+06	1.36397e+06	97976	2.10559e+07	5.38343e+07	1.51737e+08	5.95608e+07	4.23567e+07	5.82556e+07	1.67473e+07
TRUE	High	Master Protein	P61158	Actin-related protein 3 OS=Homo sapiens OX=9606 GN=ACTR3 PE=1 SV=3	21	ACTR3	3.91111e+08	4.92829e+08	2.14948e+08	5.5461e+08	2.52575e+08	3.64979e+08	1.61422e+08	1.58477e+08	4.76693e+08	3.26298e+08	3.42629e+08	1.84969e+08	1.43604e+08	1.44103e+08	1.34215e+08	1.845e+08	2.87536e+08	9.66912e+07	6.77893e+07	6.10257e+07	3.7342e+08	2.8494e+08	1.82373e+08	6.3007e+07	7.54562e+07	1.58163e+08	6.88089e+07	1.34399e+08	8.36991e+07	1.32248e+08	2.35261e+08
TRUE	High	Master Protein	Q6UWY5	Olfactomedin-like protein 1 OS=Homo sapiens OX=9606 GN=OLFML1 PE=1 SV=2	23	OLFML1	3.54941e+08	3.62126e+07	1.23088e+09	5.67245e+07	1.44193e+07	5.96653e+07	2.11351e+07	2.6943e+07	5.34965e+07	6.17885e+07	6.17568e+07	4.31003e+07	1.44492e+09	7.30208e+08	1.16259e+08	2.64808e+07	2.98964e+08	5.21017e+08	9.05356e+08	2.08797e+08	3.79042e+07	2.6805e+07	8.34098e+07	1.79044e+07	2.58138e+08	1.35847e+08	1.59825e+08	4.95355e+08	5.29838e+07	1.07458e+08	3.20765e+07
TRUE	High	Master Protein	P06727	Apolipoprotein A-IV OS=Homo sapiens OX=9606 GN=APOA4 PE=1 SV=3	27	APOA4	1.51482e+08	7.04311e+07	1.24188e+08	1.07948e+08	1.3476e+08	3.48945e+08	1.72118e+08	1.15225e+08	9.90555e+07	2.70831e+08	4.4123e+08	7.21993e+08	2.11547e+08	5.81579e+08	1.10725e+08	4.34103e+08	9.09516e+07	2.95436e+08	3.29835e+08	1.58474e+08	2.28502e+08	9.2786e+07	6.30422e+08	4.58286e+08	3.85727e+08	2.81833e+08	1.98598e+08	1.70298e+08	3.06086e+08	5.8015e+08	3.0436e+08
TRUE	High	Master Protein	P01860	Immunoglobulin heavy constant gamma 3 OS=Homo sapiens OX=9606 GN=IGHG3 PE=1 SV=2	7	IGHG3	2.61461e+08	1.831e+08	4.47125e+08	2.64665e+08	2.02541e+08	3.62425e+08	3.60291e+08	3.81529e+08	2.10492e+08	2.64828e+08	5.2491e+08	4.23504e+08	5.89292e+08	9.95165e+08	2.6022e+08	1.72436e+08	1.43151e+08	1.4826e+09	4.80435e+08	6.89479e+08	3.2391e+08	2.01834e+08	4.66434e+08	4.85805e+08	1.77739e+08	1.13346e+08	2.14491e+08	1.0028e+08	2.43667e+07	1.83613e+08	1.31613e+08
TRUE	High	Master Protein	P23528	Cofilin-1 OS=Homo sapiens OX=9606 GN=CFL1 PE=1 SV=3	13	CFL1	1.34961e+09	1.47641e+09	1.25774e+09	2.03288e+09	9.92708e+08	7.90001e+08	7.85896e+08	5.2221e+08	1.57188e+09	1.29602e+09	1.18163e+09	5.36429e+08	6.18038e+08	6.51266e+08	5.44777e+08	9.04523e+08	5.25698e+08	4.68048e+08	5.10595e+08	6.58073e+08	9.81812e+08	2.2569e+09	2.71297e+08	2.23171e+08	1.4864e+08	2.66845e+08	6.35734e+08	3.4266e+08	6.94234e+08	6.61627e+08	1.06429e+09
TRUE	High	Master Protein	P26640	Valine--tRNA ligase OS=Homo sapiens OX=9606 GN=VARS PE=1 SV=4	31	VARS; VARS2	7.14353e+07	8.98412e+07	5.12749e+07	1.8143e+08	7.89733e+07	1.27764e+08	7.87341e+07	8.79382e+07	7.69008e+07	1.00848e+08	9.46694e+07	1.29403e+08	5.8655e+07	4.087e+07	1.86692e+08	1.5705e+08	7.42856e+07	5.8287e+07	3.67803e+07	3.9213e+07	2.06638e+09	1.44031e+08	4.16415e+08	1.74977e+08	2.76215e+08	2.87472e+07	8.46128e+07	2.15442e+07	1.92371e+08	4.99827e+07	1.48648e+08
TRUE	High	Master Protein	P60842	Eukaryotic initiation factor 4A-I OS=Homo sapiens OX=9606 GN=EIF4A1 PE=1 SV=1	15	EIF4A1	3.72552e+08	3.40717e+08	1.81189e+08	4.79803e+08	2.08488e+08	2.99402e+08	1.66715e+08	1.95461e+08	2.53133e+08	2.79018e+08	2.14215e+08	3.18306e+08	2.88335e+08	1.70706e+08	4.65432e+08	4.10965e+08	1.6434e+08	1.77366e+08	1.67924e+08	3.05447e+07	3.24499e+08	3.66851e+08	3.28192e+08	8.22897e+07	1.33834e+08	2.70001e+08	2.45127e+08	2.11601e+08	6.80213e+08	3.5244e+08	4.29337e+08
TRUE	High	Master Protein	P63104	14-3-3 protein zeta/delta OS=Homo sapiens OX=9606 GN=YWHAZ PE=1 SV=1	20	YWHAZ	2.00721e+09	2.35093e+09	7.729e+08	1.84432e+09	2.09437e+09	1.70803e+09	1.4415e+09	1.21651e+09	1.80943e+09	1.44307e+09	1.6501e+09	1.3318e+09	6.50882e+08	2.84585e+08	1.79491e+09	1.67215e+09	1.06284e+09	7.97077e+08	1.02861e+08	1.58714e+08	1.64431e+09	1.99292e+09	4.66235e+08	3.97639e+08	4.29488e+08	1.2126e+09	1.46892e+09	8.22337e+08	1.76157e+09	1.24624e+09	1.40478e+09
TRUE	High	Master Protein	P02749	Beta-2-glycoprotein 1 OS=Homo sapiens OX=9606 GN=APOH PE=1 SV=3	17	APOH	1.6056e+08	1.35083e+08	2.66457e+08	1.71254e+08	1.76826e+08	2.51746e+08	3.1946e+08	3.42067e+08	1.36165e+08	2.84828e+08	5.59209e+08	1.10322e+08	4.61213e+08	3.77631e+08	3.53481e+08	6.90332e+07	2.43939e+08	5.84575e+08	3.17895e+08	5.65589e+08	2.02257e+08	2.07812e+08	2.85119e+08	3.48447e+08	2.35807e+08	1.43695e+08	2.11532e+08	1.42571e+08	9.33468e+07	1.94245e+08	1.58925e+08
TRUE	High	Master Protein	P12268	Inosine-5'-monophosphate dehydrogenase 2 OS=Homo sapiens OX=9606 GN=IMPDH2 PE=1 SV=2	20	IMPDH2	9.64304e+07	2.30956e+08	1.1126e+08	2.31003e+08	8.1341e+07	1.36392e+08	6.18378e+07	5.0119e+07	1.21327e+08	1.27602e+08	6.39057e+07	3.80602e+07	6.23712e+07	3.84534e+07	1.0715e+08	7.0911e+07	7.06708e+07	2.45707e+07	1.49925e+08	1.25709e+07	1.97614e+08	2.21334e+08	8.81605e+07	1.17932e+07	2.51283e+07	4.57296e+07	1.68277e+07	4.43185e+07	1.04037e+08	9.55946e+07	8.36181e+07
TRUE	High	Master Protein	P21399	Cytoplasmic aconitate hydratase OS=Homo sapiens OX=9606 GN=ACO1 PE=1 SV=3	29	ACO1	1.16797e+08	1.15637e+08	1.63146e+08	1.80978e+08	7.32707e+07	9.32972e+07	7.34973e+07	6.46612e+07	1.4801e+08	1.39353e+08	1.13042e+08	1.48498e+08	7.86963e+07	6.804e+07	1.48609e+08	2.12646e+08	7.89582e+07	5.31319e+07	4.11384e+07	2.14308e+07	1.84527e+08	1.40243e+08	9.71874e+07	9.70478e+07	1.98806e+08	1.39362e+08	1.31161e+08	1.29552e+08	3.16767e+08	1.82754e+08	2.27779e+08
TRUE	High	Master Protein	E9PKU7	Neutral alpha-glucosidase AB OS=Homo sapiens OX=9606 GN=GANAB PE=1 SV=1	5	GANAB	1.49416e+07	1.3442e+07	1.66848e+07	9.58839e+06	1.26954e+07	2.15934e+07	2.02114e+07	1.7742e+07	1.48461e+07	2.15728e+07	7.02684e+06	3.56214e+06	7.70273e+06	7.06157e+06	9.75493e+06	8.58263e+06	8.00917e+06	2.72818e+06	4.35065e+06	608778	463237	1.14811e+07	1.39587e+06	1.7761e+06	6.57426e+06	2.63206e+07	1.8643e+07	3.29813e+07	1.91795e+07	2.27038e+07	9.53036e+06
TRUE	High	Master Protein	P15311	Ezrin OS=Homo sapiens OX=9606 GN=EZR PE=1 SV=4	22	EZR	1.22768e+08	2.98177e+08	1.0883e+08	1.4642e+08	3.66504e+08	1.46338e+08	1.95328e+08	2.09374e+08	3.95867e+08	1.61017e+08	4.35635e+08	6.65901e+07	7.89346e+07	5.52902e+07	1.42116e+08	9.5847e+07	6.38208e+07	9.43422e+07	2.41218e+07	2.23022e+07	1.35703e+08	1.97939e+08	1.05296e+09	4.37589e+08	6.81111e+07	1.21257e+08	1.70286e+08	1.52859e+08	3.36065e+08	3.03181e+08	2.63618e+08
TRUE	High	Master Protein	P53618	Coatomer subunit beta OS=Homo sapiens OX=9606 GN=COPB1 PE=1 SV=3	22	COPB1	2.12707e+08	1.75917e+08	1.18617e+08	2.30789e+08	7.30798e+07	1.82271e+08	1.03761e+08	8.44529e+07	1.08107e+08	1.63456e+08	1.38165e+08	8.26625e+07	5.45084e+07	4.50927e+08	8.59231e+07	1.2272e+08	4.89397e+07	3.02493e+07	2.28806e+07	4.07648e+07	1.89695e+08	1.15704e+08	9.95932e+07	2.85106e+07	2.53118e+07	4.92489e+07	3.31426e+07	3.13731e+07	3.30899e+07	3.77159e+07	3.94357e+07
TRUE	High	Master Protein	P49368	T-complex protein 1 subunit gamma OS=Homo sapiens OX=9606 GN=CCT3 PE=1 SV=4	28	CCT3	1.70103e+08	3.21737e+08	2.13383e+08	2.64479e+08	1.55721e+08	2.22031e+08	1.31509e+08	1.17034e+08	1.42768e+08	2.05155e+08	1.58566e+08	1.70109e+08	2.94331e+08	9.74421e+07	3.76465e+08	3.18361e+08	1.67812e+08	1.71612e+08	8.77799e+07	1.43353e+08	3.51256e+08	3.41201e+08	1.71576e+09	1.56624e+09	1.4609e+08	3.31074e+08	3.05157e+08	2.92635e+08	4.10105e+08	3.67777e+08	5.32427e+08
TRUE	High	Master Protein	P43490	Nicotinamide phosphoribosyltransferase OS=Homo sapiens OX=9606 GN=NAMPT PE=1 SV=1	26	NAMPT	3.93936e+08	3.7689e+08	9.72113e+07	2.69779e+08	3.15529e+08	2.62259e+08	9.53075e+07	9.21314e+07	2.67788e+08	1.86879e+08	1.98511e+08	1.56543e+08	1.44734e+08	2.10533e+08	2.39641e+08	1.37408e+08	8.50286e+07	1.05168e+08	1.37119e+08	1.76329e+07	1.13365e+08	1.80345e+08	3.49674e+08	2.71007e+08	1.55329e+07	3.43697e+07	4.47721e+07	7.12608e+07	2.99745e+08	6.01044e+07	7.09698e+07
TRUE	High	Master Protein	P09972	Fructose-bisphosphate aldolase C OS=Homo sapiens OX=9606 GN=ALDOC PE=1 SV=2	19	ALDOC	1.8827e+08	1.21711e+08	9.35574e+07	1.30568e+08	1.82109e+08	9.01805e+07	1.39325e+08	3.88847e+08	1.01168e+08	2.13738e+08	1.84732e+08	1.14309e+08	2.35382e+08	2.79793e+07	1.92969e+08	3.56132e+08	3.29928e+08	1.31532e+08	1.73576e+08	2.09339e+07	2.24302e+08	6.59125e+07	1.29396e+08	6.46955e+07	1.90403e+08	4.62369e+08	6.63898e+08	4.18011e+08	1.26696e+08	1.90611e+07	2.2229e+07
TRUE	High	Master Protein	P62258	14-3-3 protein epsilon OS=Homo sapiens OX=9606 GN=YWHAE PE=1 SV=1	18	YWHAE	6.92932e+08	7.55444e+08	4.21282e+08	7.86389e+08	6.56987e+08	6.62895e+08	4.88017e+08	4.14793e+08	6.75288e+08	8.70429e+08	3.8662e+08	2.99862e+08	3.32277e+08	2.38027e+08	5.76004e+08	5.41284e+08	3.18196e+08	2.93474e+08	1.12901e+08	8.36213e+07	6.86262e+08	9.13392e+08	1.17379e+08	7.38253e+07	1.61502e+08	3.66525e+08	3.11741e+08	2.50463e+08	5.28177e+08	4.53916e+08	5.85977e+08
TRUE	High	Master Protein	Q93052	Lipoma-preferred partner OS=Homo sapiens OX=9606 GN=LPP PE=1 SV=1	24	LPP	1.13956e+08	1.34393e+08	6.64168e+07	9.93929e+07	4.48497e+07	9.41056e+07	5.47248e+07	8.0402e+07	1.06948e+08	8.1779e+07	6.50093e+07	6.83942e+07	2.44978e+08	7.51364e+07	3.15054e+07	9.02031e+07	3.21762e+07	3.49677e+07	1.27562e+07	2.00776e+07	1.18868e+08	1.03264e+08	1.19229e+07	5.93313e+06	1.08444e+07	2.24376e+07	4.65195e+07	3.32921e+07	1.8854e+07	1.29253e+07	4.61091e+07
TRUE	High	Master Protein	P01876	Immunoglobulin heavy constant alpha 1 OS=Homo sapiens OX=9606 GN=IGHA1 PE=1 SV=2	8	IGHA1	3.61459e+08	2.17676e+08	6.48658e+08	1.66099e+08	3.08122e+08	3.52355e+08	3.80072e+08	6.14e+08	7.36455e+08	2.03081e+08	7.6358e+08	8.89778e+08	7.54121e+08	3.24035e+09	4.91056e+08	1.24066e+08	2.56997e+08	1.58188e+09	1.60959e+09	6.15461e+08	2.70237e+08	2.03484e+08	2.19396e+08	7.42261e+08	1.16598e+09	7.32735e+07	1.71237e+09	7.37463e+08	1.8273e+08	4.4e+08	1.18901e+08
TRUE	High	Master Protein	Q01995	Transgelin OS=Homo sapiens OX=9606 GN=TAGLN PE=1 SV=4	23	TAGLN	6.39158e+08	4.17929e+08	3.31622e+08	4.04945e+08	1.81127e+08	5.59816e+08	2.04721e+08	3.55357e+08	2.62643e+08	5.28125e+08	7.30363e+07	1.72635e+08	1.77146e+09	2.28992e+09	2.20668e+08	1.10684e+08	3.93221e+08	4.58396e+08	1.18459e+09	9.14311e+07	4.32674e+08	7.56417e+08	5.03256e+08	1.02664e+08	4.82624e+08	2.84562e+09	6.40195e+09	7.10798e+09	5.66042e+08	4.71623e+08	9.17052e+08
TRUE	High	Master Protein	Q16181	Septin-7 OS=Homo sapiens OX=9606 GN=SEPT7 PE=1 SV=2	20	SEPT7	3.98919e+08	2.6084e+08	1.6176e+08	2.5486e+08	1.79838e+08	2.98585e+08	1.95385e+08	9.00711e+07	2.24876e+08	3.15699e+08	1.74686e+08	1.4008e+08	3.03166e+08	8.61607e+07	2.25227e+08	4.13126e+08	1.51897e+08	1.8192e+08	7.20096e+07	5.28494e+07	3.78778e+08	3.17707e+08	3.5888e+07	5.53817e+07	2.58381e+07	7.46487e+07	1.13111e+08	6.34346e+07	8.54498e+07	7.27746e+07	1.33492e+08
TRUE	High	Master Protein	Q16658	Fascin OS=Homo sapiens OX=9606 GN=FSCN1 PE=1 SV=3	22	FSCN1	2.19989e+08	2.78538e+08	4.41194e+08	4.50447e+08	3.15066e+08	2.60736e+08	3.08194e+08	1.3829e+08	5.8613e+08	7.1249e+08	3.862e+08	1.71518e+08	2.63849e+08	1.41358e+08	2.48361e+08	2.3685e+08	1.63038e+08	1.79882e+08	5.17732e+07	6.86245e+07	2.51416e+08	4.83081e+08	2.42878e+08	6.06801e+07	3.62927e+08	4.39812e+08	2.99839e+08	3.29733e+08	3.049e+08	5.42366e+08	7.33848e+08
TRUE	High	Master Protein	P08237	ATP-dependent 6-phosphofructokinase, muscle type OS=Homo sapiens OX=9606 GN=PFKM PE=1 SV=2	22	PFKM	1.45731e+08	1.76083e+08	6.29707e+07	1.96834e+08	1.89102e+08	1.34867e+08	7.7446e+07	7.2611e+07	1.22242e+08	1.44522e+08	1.05343e+08	1.15433e+08	6.66906e+07	1.60885e+07	8.99932e+07	1.15961e+08	5.77544e+07	7.42052e+07	1.16904e+07	2.17578e+07	1.05067e+08	2.01616e+08	1.99837e+08	6.29442e+07	9.06143e+07	1.61575e+08	2.24401e+08	2.24e+08	2.66649e+08	1.34641e+08	1.94597e+08
TRUE	High	Master Protein	P12429	Annexin A3 OS=Homo sapiens OX=9606 GN=ANXA3 PE=1 SV=3	25	ANXA3	1.2809e+08	2.92478e+08	5.27532e+07	2.3038e+08	9.68974e+08	1.77034e+08	9.29444e+07	1.90859e+08	7.09833e+07	4.56635e+08	1.39416e+08	4.41834e+08	1.9349e+08	1.34149e+08	3.57743e+08	3.68532e+07	2.20977e+08	2.90908e+08	4.95845e+07	6.70359e+07	8.69774e+07	1.63553e+08	7.5318e+08	4.9876e+08	2.11609e+08	3.72171e+08	8.26041e+07	3.142e+08	2.13229e+08	5.68358e+08	2.74538e+08
TRUE	High	Master Protein	P28331	NADH-ubiquinone oxidoreductase 75 kDa subunit, mitochondrial OS=Homo sapiens OX=9606 GN=NDUFS1 PE=1 SV=3	27	NDUFS1	1.68709e+08	1.37437e+08	5.0085e+07	1.45456e+08	5.7487e+07	9.59685e+07	4.82568e+07	4.55309e+07	5.22868e+07	8.75902e+07	7.48868e+07	7.49942e+07	6.82548e+07	7.16601e+07	1.4683e+08	1.63981e+08	1.94577e+08	3.38921e+07	5.04683e+07	4.69034e+07	1.84686e+08	1.67044e+08	1.03281e+08	2.3732e+07	9.14707e+07	1.58535e+08	2.02235e+08	1.46347e+08	1.7285e+08	1.17013e+08	8.22846e+07
TRUE	High	Master Protein	Q9Y2J2	Band 4.1-like protein 3 OS=Homo sapiens OX=9606 GN=EPB41L3 PE=1 SV=2	7	EPB41L3	6.70508e+07	3.16154e+07	4.03959e+07	1.22379e+08	5.09896e+07	1.03095e+08	6.17326e+07	5.39423e+07	8.90164e+07	1.08313e+08	5.53823e+07	4.4622e+07	2.07671e+07	1.19563e+07	1.70212e+07	9.02646e+07	1.25781e+07	2.26275e+07	2.8831e+07	2.005e+07	3.41622e+07	4.13522e+07	2.7975e+08	1.19425e+08	3.17024e+07	3.86635e+07	3.03904e+08	4.84617e+07	6.99213e+07	2.25783e+07	2.37415e+08
TRUE	High	Master Protein	P14543	Nidogen-1 OS=Homo sapiens OX=9606 GN=NID1 PE=1 SV=3	28	NID1	1.83129e+08	3.56559e+07	3.69373e+08	6.13921e+07	4.61204e+07	6.97217e+07	1.18395e+08	1.14987e+08	6.60455e+07	3.64459e+07	6.83094e+07	4.92232e+07	1.10939e+08	6.34941e+07	6.57564e+07	7.02774e+07	6.09871e+07	5.78507e+07	4.23306e+07	1.2483e+07	6.93222e+07	1.99099e+08	5.89159e+07	1.02139e+08	7.71185e+07	1.94584e+08	1.8786e+08	2.57485e+08	5.27255e+07	1.71337e+08	6.92462e+07
TRUE	High	Master Protein	Q86VB7	Scavenger receptor cysteine-rich type 1 protein M130 OS=Homo sapiens OX=9606 GN=CD163 PE=1 SV=2	22	CD163	1.8936e+08	5.04109e+07	4.69441e+07	5.24666e+08	8.80893e+07	1.89123e+08	8.23442e+07	5.3018e+07	7.80146e+07	2.98528e+08	8.01278e+07	6.36761e+07	3.33493e+07	6.71041e+07	2.88714e+07	1.29442e+08	8.14506e+07	2.0674e+07	5.10125e+07	2.25308e+07	4.38962e+07	1.66277e+08	7.1166e+07	6.20709e+06	1.49709e+07	2.51776e+07	1.35349e+07	1.70608e+08	3.17432e+07	3.71401e+07	1.6427e+08
TRUE	High	Master Protein	Q96QK1	Vacuolar protein sorting-associated protein 35 OS=Homo sapiens OX=9606 GN=VPS35 PE=1 SV=2	29	VPS35	1.63362e+08	2.28969e+08	1.31009e+08	2.76848e+08	1.20209e+08	1.1248e+08	1.11062e+08	1.3251e+08	1.82116e+08	1.61546e+08	1.49929e+08	1.48534e+08	1.05539e+08	5.04935e+07	1.52138e+08	2.1943e+08	1.75864e+08	6.9714e+07	4.30678e+07	2.91748e+07	2.0557e+08	1.67189e+08	2.07133e+08	1.68144e+08	2.30121e+08	2.93724e+08	2.13908e+08	2.77019e+08	9.91266e+08	2.26413e+08	1.41102e+08
TRUE	High	Master Protein	P04899	Guanine nucleotide-binding protein G(i) subunit alpha-2 OS=Homo sapiens OX=9606 GN=GNAI2 PE=1 SV=3	13	GNAI2	3.96694e+08	3.74684e+08	3.24452e+08	7.04544e+08	3.37798e+08	3.53314e+08	2.88931e+08	3.12407e+08	5.91415e+08	4.63285e+08	4.25388e+08	7.91271e+08	6.45979e+08	4.07951e+08	5.31344e+08	8.41446e+08	2.77549e+08	5.65854e+08	1.02444e+08	2.90203e+08	6.33193e+08	7.36839e+08	1.10832e+09	3.3717e+08	8.35866e+08	1.07769e+09	1.63797e+09	6.49315e+08	6.14592e+08	6.42576e+08	6.57458e+08
TRUE	High	Master Protein	O43390	Heterogeneous nuclear ribonucleoprotein R OS=Homo sapiens OX=9606 GN=HNRNPR PE=1 SV=1	18	HNRNPR	1.68769e+08	1.88433e+08	8.20395e+07	1.9203e+08	1.18732e+08	1.14823e+08	8.41408e+07	7.36888e+07	1.14257e+08	1.32391e+08	1.15997e+08	8.95338e+07	9.30221e+07	8.09552e+07	1.05353e+08	2.04204e+08	3.86626e+08	8.95444e+07	4.15858e+07	6.67213e+07	2.87335e+08	1.77026e+08	1.19272e+08	2.97598e+06	3.49717e+07	6.47831e+07	4.07883e+07	3.16866e+07	9.21414e+07	4.67344e+07	7.37995e+07
TRUE	High	Master Protein	P01859	Immunoglobulin heavy constant gamma 2 OS=Homo sapiens OX=9606 GN=IGHG2 PE=1 SV=2	7	IGHG2	4.80215e+08	2.83196e+08	6.49946e+08	5.33326e+08	3.67116e+08	3.5612e+08	7.1002e+08	7.64682e+08	3.16378e+08	3.11809e+08	5.98217e+08	5.28799e+08	4.69836e+08	1.10104e+09	2.12161e+08	7.48017e+08	3.29278e+08	1.61294e+09	8.79066e+08	9.88819e+08	4.30612e+08	4.36261e+08	1.04106e+09	2.13913e+09	2.41041e+08	4.44318e+07	5.93406e+08	1.82029e+08	8.32366e+07	2.60436e+08	1.41326e+08
TRUE	High	Master Protein	Q14624	Inter-alpha-trypsin inhibitor heavy chain H4 OS=Homo sapiens OX=9606 GN=ITIH4 PE=1 SV=4	30	ITIH4	2.25532e+07	2.65006e+07	9.63721e+07	2.84852e+07	3.92188e+07	2.71167e+07	1.94818e+07	4.2791e+07	3.4656e+07	4.60167e+07	4.98865e+07	8.17432e+07	9.67562e+07	3.82396e+08	7.35655e+07	3.90863e+07	4.77472e+07	1.71113e+08	2.27872e+08	1.74463e+08	4.74277e+07	4.66168e+07	1.353e+08	1.64446e+07	1.43451e+08	1.3342e+08	2.20315e+08	1.34423e+08	8.25744e+07	1.48038e+08	5.96328e+07
TRUE	High	Master Protein	P17661	Desmin OS=Homo sapiens OX=9606 GN=DES PE=1 SV=3	20	DES	5.16177e+07	7.46489e+07	4.69554e+07	3.84362e+07	1.47833e+07	1.44398e+08	2.0219e+07	6.19194e+07	3.03446e+07	2.86532e+07	2.82219e+07	1.30451e+07	1.17939e+08	3.88278e+07	2.46008e+07	3.67596e+07	8.72433e+07	2.03959e+07	4.73498e+07	3.98396e+07	1.18521e+08	2.92198e+07	8.19199e+07	4.24387e+07	9.12767e+07	2.57362e+08	4.23071e+08	5.8083e+08	4.61008e+07	6.17273e+07	6.62577e+07
TRUE	High	Master Protein	O15061	Synemin OS=Homo sapiens OX=9606 GN=SYNM PE=1 SV=2	35	SYNM	3.96112e+07	1.94312e+07	7.6703e+07	4.62599e+07	2.03526e+08	1.07629e+08	7.36664e+07	2.88318e+07	1.45987e+08	3.84961e+07	4.49278e+07	2.95329e+07	3.61318e+07	1.46627e+07	3.93552e+07	2.68189e+07	8.01403e+07	6.23239e+07	1.39761e+07	8.59881e+06	5.11772e+07	3.16835e+07	6.90358e+07	9.63333e+07	5.27858e+07	6.51382e+07	7.44082e+07	1.506e+08	8.2706e+07	1.02981e+08	3.28731e+08
TRUE	High	Master Protein	P35527	Keratin, type I cytoskeletal 9 OS=Homo sapiens OX=9606 GN=KRT9 PE=1 SV=3	24	KRT9	1.16327e+08	1.17881e+08	3.19531e+08	1.52936e+08	9.35111e+07	1.70462e+08	8.51549e+07	1.42196e+08	1.69159e+08	1.79925e+08	1.05871e+08	2.95341e+07	4.43625e+07	4.25858e+07	1.46448e+08	9.66895e+07	5.08454e+07	9.42772e+07	2.48783e+07	6.17638e+07	5.29061e+08	9.4165e+07	5.48186e+08	2.21016e+08	1.21181e+08	1.1403e+08	1.67432e+08	1.96826e+08	8.84402e+07	2.38281e+08	2.76258e+08
TRUE	High	Master Protein	P63244	Receptor of activated protein C kinase 1 OS=Homo sapiens OX=9606 GN=RACK1 PE=1 SV=3	20	GNB2L1; RACK1	3.52287e+08	3.47236e+08	2.75308e+08	4.90654e+08	1.33534e+08	3.94591e+08	1.56494e+08	1.39167e+08	1.88888e+08	3.13075e+08	1.92551e+08	2.38562e+08	2.93491e+08	1.89078e+08	3.65929e+08	3.48737e+08	1.53601e+08	1.26727e+08	1.09227e+08	4.9488e+07	4.87603e+08	3.0387e+08	1.62284e+08	1.16692e+08	1.42682e+08	2.39641e+08	1.47181e+08	1.75972e+08	4.72096e+08	2.57835e+08	4.31481e+08
TRUE	High	Master Protein	P01871	Immunoglobulin heavy constant mu OS=Homo sapiens OX=9606 GN=IGHM PE=1 SV=4	7	IGHM	2.14547e+08	5.20519e+08	4.04203e+08	8.57732e+07	2.73104e+08	9.46916e+07	2.32648e+08	4.50952e+08	1.2257e+08	1.14153e+08	5.47905e+08	1.10975e+09	3.95527e+08	8.91217e+08	2.8978e+08	2.71269e+08	4.44054e+08	1.14429e+09	9.60413e+08	3.74231e+08	1.19353e+08	2.00039e+08	2.76675e+09	1.64787e+09	1.0924e+09	5.10859e+08	5.14989e+08	1.71439e+08	2.23006e+08	1.75128e+08	1.86425e+08
TRUE	High	Master Protein	P10909	Clusterin OS=Homo sapiens OX=9606 GN=CLU PE=1 SV=1	20	CLU	2.63735e+08	2.78433e+08	6.37227e+08	2.21829e+08	4.07003e+08	6.95055e+08	3.44403e+08	3.03849e+08	2.22558e+08	4.06324e+08	4.28996e+08	9.69364e+07	5.91213e+08	1.26585e+09	4.05637e+08	1.73407e+08	1.02323e+09	1.0412e+09	1.63188e+09	5.21258e+08	4.11312e+08	2.50753e+08	5.6871e+08	2.42002e+08	3.88368e+08	1.85167e+08	1.23156e+09	9.34022e+08	1.93277e+08	8.11399e+08	1.60446e+08
TRUE	High	Master Protein	Q9HBL0	Tensin-1 OS=Homo sapiens OX=9606 GN=TNS1 PE=1 SV=2	7	TNS1	9.30027e+07	3.72939e+07	3.32358e+07	5.97886e+07	4.06657e+07	6.89802e+07	5.95795e+07	8.72197e+07	3.10372e+07	6.35516e+07	3.37701e+07	1.91821e+07	3.132e+07	2.27969e+07	1.9743e+07	8.17557e+07	4.69063e+07	2.17545e+07	1.27214e+07	9.23495e+06	5.80937e+07	2.45515e+07	1.95669e+07	7.99271e+06	1.17582e+08	4.80494e+07	8.78877e+07	1.12673e+08	2.27528e+07	6.80062e+07	1.7687e+07
TRUE	High	Master Protein	E5RK69	Annexin OS=Homo sapiens OX=9606 GN=ANXA6 PE=1 SV=1	7		1.36641e+07	3.11004e+07	1.54285e+07	3.4539e+07	1.15119e+07	2.4748e+07	1.03535e+07	1.03991e+07	1.96564e+07	1.44893e+07	2.13772e+07	1.89064e+07	4.71812e+06	2.06588e+06	1.97211e+07	1.3487e+07	6.36723e+06	5.66033e+06	1.166e+06	3.50685e+06	3.73225e+07	1.44721e+07	100943	6.13283e+07	138381	135701	266028	319740	1.39389e+06	1.63309e+06	5.7436e+06
TRUE	High	Master Protein	P22695	Cytochrome b-c1 complex subunit 2, mitochondrial OS=Homo sapiens OX=9606 GN=UQCRC2 PE=1 SV=3	18	UQCRC2	3.32433e+08	2.9196e+08	1.22503e+08	2.75426e+08	1.21328e+08	2.24503e+08	1.4295e+08	1.14854e+08	1.08102e+08	1.43571e+08	1.31606e+08	1.67272e+08	2.08095e+08	8.57682e+07	2.02227e+08	2.51024e+08	2.08244e+08	1.5063e+08	6.40934e+07	2.57327e+07	3.98313e+08	2.39264e+08	7.91016e+07	2.09836e+07	1.04146e+08	2.39991e+08	2.64881e+08	1.90998e+08	2.1324e+08	1.28438e+08	1.07339e+08
TRUE	High	Master Protein	Q5TCU3	Tropomyosin beta chain OS=Homo sapiens OX=9606 GN=TPM2 PE=1 SV=1	5	TPM2	1.15262e+07	4.27848e+06	1.00336e+07	1.28819e+07	4.79135e+06	1.7217e+07	2.45782e+07	4.47527e+07	8.87149e+06	1.48085e+07	6.9738e+06	7.56322e+06	7.39084e+07	7.37711e+07	3.94862e+06	1.31584e+07	2.35822e+07	1.96709e+07	2.57581e+07	2.18044e+07	1.7201e+07	3.51468e+07	614629	2.74212e+08	8.60069e+06	6.97488e+07	2.09327e+08	1.21823e+08	1.19449e+07	3.12247e+06	4.98763e+07
TRUE	High	Master Protein	P09104	Gamma-enolase OS=Homo sapiens OX=9606 GN=ENO2 PE=1 SV=3	15	ENO2	1.1698e+08	1.55737e+08	5.61015e+07	5.96369e+07	2.38998e+08	8.39366e+07	2.11848e+08	2.46562e+08	2.87864e+07	7.73338e+07	2.23927e+08	1.49392e+08	1.12758e+08	1.76717e+07	2.42526e+08	2.16623e+08	3.26622e+07	7.08544e+07	1.37216e+07	7.8809e+06	1.06137e+08	5.94439e+07	6.2728e+07	3.24318e+07	6.28931e+07	1.8485e+08	3.18169e+08	1.25041e+08	1.01832e+08	1.54326e+08	2.06487e+07
TRUE	High	Master Protein	P40763	Signal transducer and activator of transcription 3 OS=Homo sapiens OX=9606 GN=STAT3 PE=1 SV=2	22	STAT3	1.62061e+08	1.28311e+08	1.05051e+08	1.47803e+08	6.02138e+07	1.0183e+08	3.27065e+07	7.99351e+07	5.77257e+07	7.46187e+07	6.74817e+07	1.02484e+08	1.11587e+09	2.90749e+07	2.02864e+08	1.24268e+08	5.00349e+07	4.56906e+08	2.59592e+07	8.20766e+06	9.30832e+07	8.55868e+07	6.09797e+07	1.0035e+08	7.97493e+07	5.77072e+07	6.7658e+07	6.57036e+07	5.31491e+07	4.57198e+08	8.78826e+07
TRUE	High	Master Protein	P02766	Transthyretin OS=Homo sapiens OX=9606 GN=TTR PE=1 SV=1	12	TTR	4.58875e+07	7.50675e+07	8.20716e+07	2.05891e+08	1.63362e+08	2.2014e+08	3.88537e+08	1.67478e+08	1.33574e+08	1.82631e+08	2.72548e+08	1.01136e+08	1.8848e+08	6.50749e+08	3.24347e+07	7.55449e+07	7.02686e+07	2.69036e+08	1.3759e+08	1.73776e+08	8.02638e+07	1.59531e+08	8.36648e+07	7.17844e+06	1.38752e+08	9.05358e+07	1.32891e+08	1.35338e+08	4.60177e+07	3.37553e+08	1.11757e+08
TRUE	High	Master Protein	P11940	Polyadenylate-binding protein 1 OS=Homo sapiens OX=9606 GN=PABPC1 PE=1 SV=2	17	PABPC1	3.6666e+08	3.58252e+08	2.02855e+08	4.05948e+08	1.93556e+08	3.28796e+08	1.91908e+08	1.36397e+08	2.52702e+08	3.76935e+08	2.47977e+08	1.89397e+08	1.17114e+08	9.47091e+07	2.45106e+08	2.54578e+08	1.47885e+08	1.15501e+08	5.92693e+07	2.82711e+07	4.14967e+08	2.85771e+08	7.89047e+07	1.34341e+08	4.74739e+07	1.29847e+08	9.05535e+07	9.63164e+07	2.39697e+08	2.17867e+08	2.44845e+08
TRUE	High	Master Protein	P31930	Cytochrome b-c1 complex subunit 1, mitochondrial OS=Homo sapiens OX=9606 GN=UQCRC1 PE=1 SV=3	17	UQCRC1	2.60617e+08	2.33835e+08	8.34599e+07	2.01106e+08	1.38405e+08	2.11907e+08	1.08868e+08	1.34672e+08	8.99285e+07	1.33363e+08	1.25195e+08	9.6603e+07	1.01159e+08	4.27573e+07	1.67927e+08	2.42197e+08	1.36676e+08	7.12631e+07	4.91654e+07	1.98798e+07	2.48439e+08	8.73711e+07	9.3521e+07	1.4338e+08	6.0425e+07	1.1894e+08	2.07395e+08	8.39185e+07	1.21775e+08	7.21786e+07	1.16895e+08
TRUE	High	Master Protein	Q9NRN5	Olfactomedin-like protein 3 OS=Homo sapiens OX=9606 GN=OLFML3 PE=2 SV=1	23	OLFML3	1.9434e+08	1.01077e+08	5.93275e+08	9.09637e+07	7.89152e+07	6.77983e+07	3.47997e+07	3.1224e+07	7.07088e+07	2.20165e+08	7.47237e+07	1.43675e+08	8.5399e+08	8.53233e+08	2.89232e+08	1.4167e+08	3.93893e+08	3.36317e+08	5.26556e+08	1.11545e+08	8.36124e+07	4.25239e+07	1.98614e+08	9.05764e+08	2.85392e+08	1.58319e+09	3.03767e+08	5.58671e+08	3.59808e+08	3.10024e+08	2.44437e+08
TRUE	High	Master Protein	O60506	Heterogeneous nuclear ribonucleoprotein Q OS=Homo sapiens OX=9606 GN=SYNCRIP PE=1 SV=2	19	SYNCRIP	2.67158e+08	3.09501e+08	2.12211e+08	3.3545e+08	3.06795e+08	2.72831e+08	2.60841e+08	2.29899e+08	2.55181e+08	3.70374e+08	2.92217e+08	1.82361e+08	2.16843e+08	1.57078e+08	2.85593e+08	3.90144e+08	2.92432e+08	1.32417e+08	1.39964e+08	1.05221e+08	3.23526e+08	4.32617e+08	2.75064e+08	1.11826e+08	9.43996e+07	1.8865e+08	1.26093e+08	1.88353e+08	2.81207e+08	2.19217e+08	2.27206e+08
TRUE	High	Master Protein	P11413	Glucose-6-phosphate 1-dehydrogenase OS=Homo sapiens OX=9606 GN=G6PD PE=1 SV=4	26	G6PD	1.07054e+08	1.72964e+08	1.90422e+08	2.45466e+08	1.6473e+08	5.36869e+08	2.14014e+08	1.50788e+08	9.93139e+07	1.55101e+08	1.30842e+08	2.64081e+08	2.10651e+08	5.4402e+07	8.38316e+08	1.27224e+08	2.35289e+08	8.80686e+07	4.68494e+07	5.69746e+07	2.47442e+08	3.86457e+08	3.95496e+08	5.83119e+07	1.34912e+08	1.68804e+08	2.12799e+08	1.8189e+08	4.37433e+08	2.28636e+08	7.23345e+08
TRUE	High	Master Protein	P11586	C-1-tetrahydrofolate synthase, cytoplasmic OS=Homo sapiens OX=9606 GN=MTHFD1 PE=1 SV=3	31	MTHFD1	1.73768e+08	1.70734e+08	8.95271e+07	2.17598e+08	8.71799e+07	1.05441e+08	3.74207e+07	4.41388e+07	1.45774e+08	1.73645e+08	1.46551e+08	7.68796e+07	8.12946e+07	4.62456e+07	1.20432e+08	1.55169e+08	1.06396e+08	7.08533e+07	3.61367e+07	3.17325e+07	1.37937e+08	2.10666e+08	1.34042e+08	1.67999e+07	8.06528e+07	1.19252e+08	1.49206e+08	1.06377e+08	2.89934e+08	1.03804e+08	9.94225e+07
TRUE	High	Master Protein	O94973	AP-2 complex subunit alpha-2 OS=Homo sapiens OX=9606 GN=AP2A2 PE=1 SV=2	9	AP2A2	1.28282e+08	1.75394e+08	6.53067e+07	9.71976e+07	2.35327e+07	9.95576e+07	4.45322e+07	3.45261e+07	4.63078e+07	6.71989e+07	6.13395e+07	4.02413e+07	4.05995e+07	1.4517e+07	4.46076e+07	7.19387e+07	5.73694e+07	2.22944e+07	9.07813e+06	1.00056e+08	5.99901e+07	5.48476e+07	1.22455e+08	8.78491e+06	1.54383e+07	2.70286e+07	6.74815e+07	1.41545e+07	2.79795e+07	2.98745e+07	4.71844e+07
TRUE	High	Master Protein	Q15181	Inorganic pyrophosphatase OS=Homo sapiens OX=9606 GN=PPA1 PE=1 SV=2	22	PPA1	3.40839e+08	2.06128e+08	1.7524e+08	4.66241e+08	1.85628e+08	1.94498e+08	1.22895e+08	9.69722e+07	5.47976e+08	1.98417e+08	2.22076e+08	1.89317e+08	8.61642e+07	5.34633e+07	1.76404e+08	1.9069e+08	1.50752e+08	6.27224e+07	4.3429e+07	3.82106e+07	1.1171e+08	1.03571e+08	1.14296e+08	8.53301e+07	6.89891e+07	5.63947e+07	9.21432e+07	6.99743e+07	5.4246e+08	1.35083e+08	1.13402e+08
TRUE	High	Master Protein	P30043	Flavin reductase (NADPH) OS=Homo sapiens OX=9606 GN=BLVRB PE=1 SV=3	13	BLVRB	2.73335e+08	1.86424e+08	2.26936e+08	1.94404e+08	1.79323e+08	2.28742e+08	1.47146e+08	1.50291e+08	9.49779e+07	1.84438e+08	1.80438e+08	1.38172e+08	9.68793e+07	1.04286e+08	1.84747e+08	1.03518e+08	3.60688e+08	1.6789e+08	2.30133e+08	5.57417e+08	1.14546e+08	1.76753e+08	4.67626e+07	2.83559e+07	2.5472e+08	1.0891e+08	2.30935e+08	1.24863e+08	1.30785e+08	1.02819e+08	1.61141e+08
TRUE	High	Master Protein	Q9NVA2	Septin-11 OS=Homo sapiens OX=9606 GN=SEPT11 PE=1 SV=3	13	SEPT11	3.05061e+08	2.86512e+08	2.20479e+08	3.78989e+08	1.76952e+08	3.45338e+08	2.32877e+08	1.78234e+08	2.88791e+08	3.54578e+08	1.60749e+08	1.15732e+08	2.92945e+08	1.51957e+08	2.7338e+08	6.90772e+08	7.80173e+07	1.9115e+08	7.97916e+07	2.19909e+07	1.79104e+08	2.7908e+08	6.91137e+07	6.73755e+07	9.52286e+07	3.8839e+08	7.15087e+08	2.77136e+08	3.59709e+08	3.7401e+08	5.80231e+08
TRUE	High	Master Protein	Q1KMD3	Heterogeneous nuclear ribonucleoprotein U-like protein 2 OS=Homo sapiens OX=9606 GN=HNRNPUL2 PE=1 SV=1	27	HNRNPUL2	2.65221e+08	2.07408e+08	1.14301e+08	2.51912e+08	1.28812e+08	1.97804e+08	1.18012e+08	8.74499e+07	1.41126e+08	2.28477e+08	1.72131e+08	2.17282e+08	1.25062e+08	4.8803e+07	1.83333e+08	2.45655e+08	9.39015e+07	8.18259e+07	2.71172e+07	2.22933e+07	5.80707e+08	1.82102e+08	3.41932e+07	3.54238e+07	3.69228e+07	6.11158e+07	1.43336e+08	4.92264e+07	1.17644e+08	1.1782e+08	1.85688e+08
TRUE	High	Master Protein	P48735	Isocitrate dehydrogenase [NADP], mitochondrial OS=Homo sapiens OX=9606 GN=IDH2 PE=1 SV=2	25	IDH2	1.45376e+08	1.29287e+08	9.47835e+07	2.34391e+08	2.95024e+08	1.22518e+08	1.48962e+08	1.06034e+08	1.08595e+08	1.80423e+08	1.03224e+08	1.58717e+08	9.92113e+07	7.64841e+07	9.38936e+07	3.39807e+08	1.05007e+08	1.00058e+08	5.15502e+07	1.86595e+07	1.64189e+08	1.53464e+08	1.15476e+08	1.73083e+08	2.17117e+08	8.93541e+08	6.81178e+08	5.79359e+08	2.74475e+08	2.18657e+08	2.73301e+08
TRUE	High	Master Protein	O00429	Dynamin-1-like protein OS=Homo sapiens OX=9606 GN=DNM1L PE=1 SV=2	5	DNM1L	5.34555e+07	5.99783e+07	3.44428e+07	5.28837e+07	2.84825e+07	5.29707e+07	4.18953e+07	4.18586e+07	4.03139e+07	2.38767e+07	3.37552e+07	3.86338e+07	2.01598e+07	8.0285e+06	6.2328e+07	8.78479e+07	1.74321e+07	1.92576e+07	1.14006e+07	6.95937e+06	4.48868e+07	3.92732e+07	1.02147e+08	1.20892e+07	1.26465e+08	4.85853e+08	1.3964e+08	3.02236e+08	6.06692e+08	2.77787e+08	2.40457e+07
TRUE	High	Master Protein	P35606	Coatomer subunit beta' OS=Homo sapiens OX=9606 GN=COPB2 PE=1 SV=2	26	COPB2	1.54414e+08	3.30697e+08	3.43622e+08	2.99194e+08	3.49487e+08	1.74343e+08	2.85961e+08	3.47829e+08	7.45822e+08	1.51208e+08	5.76312e+08	1.20115e+08	8.7142e+07	6.65333e+07	1.77381e+08	1.85794e+08	3.07989e+08	5.42466e+07	2.18693e+07	2.79685e+07	2.53401e+08	2.95656e+08	3.06601e+08	1.68932e+08	3.49482e+07	4.33712e+07	8.40422e+07	1.79244e+07	1.70927e+08	7.07722e+07	1.91937e+08
TRUE	High	Master Protein	Q99536	Synaptic vesicle membrane protein VAT-1 homolog OS=Homo sapiens OX=9606 GN=VAT1 PE=1 SV=2	19	VAT1	1.95264e+08	1.75609e+08	6.88339e+07	1.82975e+08	1.05698e+08	1.73912e+08	1.02649e+08	8.43917e+07	2.20984e+08	2.04268e+08	1.37445e+08	1.71554e+08	2.06142e+08	5.69844e+07	1.4531e+08	6.77029e+07	4.03048e+07	1.29297e+08	1.31008e+08	2.51514e+07	7.25482e+08	1.08566e+08	1.14362e+08	6.18357e+06	1.99789e+07	2.75816e+07	1.48583e+07	2.25574e+07	3.36527e+07	3.98779e+07	5.21964e+07
TRUE	High	Master Protein	Q92841	Probable ATP-dependent RNA helicase DDX17 OS=Homo sapiens OX=9606 GN=DDX17 PE=1 SV=2	24	DDX17	3.38896e+08	3.87756e+08	1.28261e+08	4.03856e+08	1.86541e+08	2.43054e+08	1.63526e+08	1.46095e+08	2.57182e+08	3.36059e+08	2.25092e+08	1.51622e+08	2.0101e+08	3.18127e+09	2.68809e+08	3.2332e+08	4.12539e+08	1.02298e+08	6.54568e+07	2.60121e+07	6.70892e+08	2.57641e+08	3.80965e+08	1.66619e+08	1.43947e+08	1.55361e+08	1.64792e+08	1.12956e+08	2.94243e+08	1.49369e+08	2.5942e+08
TRUE	High	Master Protein	O60701	UDP-glucose 6-dehydrogenase OS=Homo sapiens OX=9606 GN=UGDH PE=1 SV=1	24	UGDH	1.48274e+08	1.42813e+08	1.2181e+08	1.6078e+08	5.46273e+07	9.2637e+07	1.17885e+08	6.07642e+07	1.86513e+08	1.00556e+08	1.73956e+08	1.40501e+08	7.45874e+07	9.50803e+07	6.59401e+07	1.5873e+08	8.03841e+07	3.6385e+07	5.05922e+07	3.078e+07	7.79748e+07	1.2351e+08	8.49012e+07	8.95054e+07	2.77853e+07	8.7043e+07	6.3868e+07	7.4168e+07	1.0471e+08	1.30802e+08	8.96326e+07
TRUE	High	Master Protein	P05455	Lupus La protein OS=Homo sapiens OX=9606 GN=SSB PE=1 SV=2	26	SSB	1.68845e+08	2.43022e+08	6.90846e+08	3.24981e+08	1.54074e+08	2.14223e+08	1.42074e+08	1.01545e+08	1.8767e+08	2.3177e+08	1.45022e+08	9.45848e+07	1.01219e+08	2.67965e+07	2.69241e+08	2.18901e+08	7.605e+07	5.1052e+07	2.20254e+07	3.07958e+07	2.93962e+08	2.06491e+08	5.39718e+07	2.86298e+07	3.25663e+07	5.91177e+07	2.35414e+07	6.3372e+07	9.63394e+07	7.7222e+07	8.50748e+07
TRUE	High	Master Protein	Q7Z7G0	Target of Nesh-SH3 OS=Homo sapiens OX=9606 GN=ABI3BP PE=1 SV=1	24	ABI3BP	5.03996e+07	4.42221e+07	9.68306e+07	1.12227e+08	2.69353e+07	2.31981e+08	5.6871e+07	5.0158e+07	9.84281e+07	7.10178e+07	7.71446e+07	3.42332e+07	3.30296e+08	2.27754e+08	2.92892e+08	3.61436e+07	8.62385e+07	1.67017e+08	8.13393e+07	4.82098e+07	1.42699e+08	3.36335e+07	4.32468e+07	1.76964e+07	5.69774e+07	6.04401e+06	3.73404e+07	1.45574e+08	7.21536e+07	1.48321e+08	3.53357e+07
TRUE	High	Master Protein	Q02252	Methylmalonate-semialdehyde dehydrogenase [acylating], mitochondrial OS=Homo sapiens OX=9606 GN=ALDH6A1 PE=1 SV=2	25	ALDH6A1	2.63286e+08	1.92805e+08	1.39994e+08	2.53807e+08	1.27355e+08	2.02179e+08	4.415e+07	9.18564e+07	9.26773e+07	1.13457e+08	9.73007e+07	1.31185e+08	8.99335e+07	7.90848e+07	1.10212e+08	1.24506e+08	4.70571e+08	6.06532e+07	9.95634e+07	1.81096e+08	1.36362e+08	1.79473e+08	1.26628e+08	4.3939e+07	1.6285e+08	2.4074e+08	2.57795e+08	1.83824e+08	4.68386e+08	8.04038e+07	2.7529e+08
TRUE	High	Master Protein	Q01469	Fatty acid-binding protein, epidermal OS=Homo sapiens OX=9606 GN=FABP5 PE=1 SV=3	14	FABP5	1.43951e+09	1.68059e+09	2.31578e+08	4.19535e+08	2.74454e+07	2.32328e+08	9.96216e+07	1.11895e+08	8.61794e+07	4.08716e+08	9.27635e+07	2.24806e+08	9.70401e+07	4.79597e+07	1.81001e+08	1.38003e+08	5.02392e+07	3.10635e+07	3.54015e+07	3.95602e+07	1.15474e+08	5.3638e+08	1.17657e+08	5.85139e+07	4.27998e+07	9.20707e+07	7.35711e+07	9.49471e+07	1.19284e+08	1.39882e+08	1.40573e+08
TRUE	High	Master Protein	P09543	2',3'-cyclic-nucleotide 3'-phosphodiesterase OS=Homo sapiens OX=9606 GN=CNP PE=1 SV=2	22	CNP	7.56474e+07	7.34011e+07	6.73084e+07	6.96128e+07	3.21445e+08	2.90793e+07	2.2853e+07	4.82317e+07	9.93128e+07	5.02843e+07	6.95128e+07	5.93615e+07	8.25627e+07	6.49656e+07	7.64704e+07	8.07636e+08	5.0809e+07	1.24203e+08	2.70962e+07	4.26364e+07	1.76196e+08	5.77067e+07	1.58447e+08	4.12753e+08	9.65163e+07	1.25006e+08	8.19782e+08	1.44884e+08	1.82308e+08	5.89298e+07	5.58758e+07
TRUE	High	Master Protein	O75367	Core histone macro-H2A.1 OS=Homo sapiens OX=9606 GN=H2AFY PE=1 SV=4	13	H2AFY	2.21534e+08	4.11084e+08	1.17047e+08	2.77599e+08	6.03752e+07	2.24739e+08	8.23282e+07	1.65619e+08	6.40833e+07	1.78082e+08	1.00202e+08	8.22605e+07	1.14198e+08	3.3128e+07	1.99072e+08	1.35707e+08	2.57967e+08	6.16666e+07	3.17255e+07	2.62321e+07	2.72461e+08	2.00507e+08	1.24378e+08	1.0099e+08	2.6109e+07	4.09865e+07	6.64114e+07	2.90692e+07	5.63292e+07	4.73594e+07	8.61538e+07
TRUE	High	Master Protein	P11498	Pyruvate carboxylase, mitochondrial OS=Homo sapiens OX=9606 GN=PC PE=1 SV=2	27	PC	5.74725e+07	1.2733e+08	6.82255e+07	7.56768e+07	6.20357e+07	1.10253e+08	9.55748e+07	4.81572e+07	7.54543e+07	4.22305e+07	1.67451e+08	2.04097e+07	2.52351e+07	2.02209e+07	7.48971e+07	9.73173e+07	1.09237e+08	3.19248e+07	1.27593e+07	2.97471e+07	8.34597e+07	8.16023e+07	6.42201e+08	7.2751e+07	4.94534e+07	9.17097e+07	1.26017e+08	8.43726e+07	5.78741e+07	3.77344e+07	8.50597e+07
TRUE	High	Master Protein	Q9Y3I0	tRNA-splicing ligase RtcB homolog OS=Homo sapiens OX=9606 GN=RTCB PE=1 SV=1	21	C22orf28; RTCB	2.69242e+08	3.26125e+08	2.03305e+08	3.88647e+08	1.51997e+08	3.27661e+08	2.4198e+08	3.40506e+08	1.59785e+08	2.25816e+08	1.7774e+08	1.07535e+08	1.08643e+08	6.73342e+07	1.38712e+08	1.09132e+08	5.94751e+07	7.83807e+07	4.91992e+07	3.79647e+07	2.06443e+08	2.03742e+08	2.42934e+08	1.52075e+08	8.45579e+07	1.05933e+08	4.25771e+07	9.44076e+07	1.07863e+08	9.33594e+07	3.98089e+07
TRUE	High	Master Protein	P31948	Stress-induced-phosphoprotein 1 OS=Homo sapiens OX=9606 GN=STIP1 PE=1 SV=1	30	STIP1	2.60768e+08	3.3116e+08	1.42297e+08	3.30151e+08	2.22613e+08	1.83288e+08	1.9439e+08	1.96298e+08	2.31659e+08	4.24414e+08	1.21269e+08	1.80607e+08	1.78899e+08	1.00192e+08	2.61051e+08	1.35643e+08	1.10811e+08	8.05691e+07	5.52546e+07	7.01206e+07	2.90165e+08	3.84157e+08	2.06438e+08	1.27038e+08	1.03518e+08	1.65181e+08	2.07306e+08	1.42554e+08	5.0472e+08	2.84422e+08	5.8533e+08
TRUE	High	Master Protein	P14550	Alcohol dehydrogenase [NADP(+)] OS=Homo sapiens OX=9606 GN=AKR1A1 PE=1 SV=3	20	AKR1A1	9.36729e+07	2.87538e+08	1.83802e+08	1.98484e+08	1.92881e+08	1.0483e+08	1.39523e+08	1.24606e+08	2.58155e+08	1.35703e+08	1.34129e+08	1.39942e+08	1.40014e+08	9.07963e+07	2.4271e+08	2.59242e+08	2.2168e+08	1.30856e+08	3.76658e+07	5.34497e+07	2.81959e+08	1.80757e+08	1.08545e+08	6.01482e+07	3.45358e+07	4.71447e+07	7.74741e+07	1.47258e+08	1.18519e+08	1.00341e+08	3.85598e+08
TRUE	High	Master Protein	P50990	T-complex protein 1 subunit theta OS=Homo sapiens OX=9606 GN=CCT8 PE=1 SV=4	28	CCT8	2.0724e+08	3.24627e+08	3.38874e+08	2.39056e+08	1.46655e+08	2.59478e+08	2.18222e+08	1.49382e+08	1.78787e+08	2.34284e+08	1.8018e+08	3.95598e+08	1.42234e+08	9.92763e+07	1.78197e+08	3.15486e+08	1.99173e+08	1.35602e+08	8.36863e+07	6.7404e+07	2.9668e+08	2.86689e+08	2.89345e+08	2.13352e+08	9.82741e+07	2.43944e+08	3.01065e+08	1.97348e+08	2.63658e+08	1.60634e+08	2.37467e+08
TRUE	High	Master Protein	P30086	Phosphatidylethanolamine-binding protein 1 OS=Homo sapiens OX=9606 GN=PEBP1 PE=1 SV=3	15	PEBP1	7.97222e+08	1.00138e+09	5.93458e+08	1.09496e+09	1.53389e+09	9.62874e+08	8.13313e+08	7.1782e+08	9.95012e+08	9.23259e+08	7.11577e+08	2.70385e+08	7.28146e+08	2.12733e+08	6.03774e+08	1.34845e+09	5.09906e+08	5.45767e+08	1.59744e+08	1.68871e+08	7.11637e+08	6.49685e+08	1.07472e+08	5.70175e+08	3.14696e+08	4.42847e+08	8.05456e+08	4.79557e+08	6.21195e+08	3.81448e+08	1.07525e+09
TRUE	High	Master Protein	Q01518	Adenylyl cyclase-associated protein 1 OS=Homo sapiens OX=9606 GN=CAP1 PE=1 SV=5	17	CAP1	3.28578e+08	4.23555e+08	3.17969e+08	6.50937e+08	4.72091e+08	3.60397e+08	4.49257e+08	3.1101e+08	5.37821e+08	4.32881e+08	3.06384e+08	3.92693e+08	2.64597e+08	2.6817e+08	1.648e+08	3.48655e+08	4.02393e+08	1.49671e+08	1.19462e+08	5.95883e+07	4.29039e+08	6.35792e+08	9.0747e+07	3.8679e+07	9.92489e+07	1.54051e+08	1.47452e+08	2.39988e+08	2.16379e+08	2.37312e+08	4.4738e+08
TRUE	High	Master Protein	Q99832	T-complex protein 1 subunit eta OS=Homo sapiens OX=9606 GN=CCT7 PE=1 SV=2	26	CCT7	1.11553e+08	1.77494e+08	1.31715e+08	1.67039e+08	1.43397e+08	1.37178e+08	1.09291e+08	1.08349e+08	1.84295e+08	1.40872e+08	1.17232e+08	9.74376e+07	1.12747e+08	5.10736e+07	1.50141e+08	1.60584e+08	7.14164e+07	8.76073e+07	3.76247e+07	4.26415e+07	1.3311e+08	1.31087e+08	9.94773e+07	3.21721e+07	1.14621e+08	1.88765e+08	2.55222e+08	1.86436e+08	2.6928e+08	1.66791e+08	2.97331e+08
TRUE	High	Master Protein	E9PMV1	Plectin (Fragment) OS=Homo sapiens OX=9606 GN=PLEC PE=1 SV=1	2		5.69937e+06	55180272	5.8749e+07	1.12876e+08	3.18069e+08	2.95874e+07	117728	195329	152063	2.83846e+08	3.08767e+06	87923.6	192358	86771.1	22172.2	21598.6	160304	108570	184855	64391.3	154551	15813.4	101266	211680	129467	1.52222e+07	1.75742e+07	2.37081e+07	85009.8	211580	3.0273e+07
TRUE	High	Master Protein	Q14152	Eukaryotic translation initiation factor 3 subunit A OS=Homo sapiens OX=9606 GN=EIF3A PE=1 SV=1	35	EIF3A	1.36197e+08	9.25048e+07	7.24332e+07	1.30334e+08	6.07636e+07	9.65053e+07	4.89494e+07	4.56572e+07	6.56736e+07	7.97621e+07	7.75104e+07	4.65621e+07	5.61908e+07	2.73148e+07	5.58275e+07	7.11313e+07	3.36109e+07	2.85123e+07	1.04125e+08	2.78399e+07	6.29573e+07	1.1625e+08	1.0613e+08	4.96668e+07	4.34005e+07	1.19953e+08	1.08062e+08	6.27898e+07	1.16888e+08	6.04413e+07	1.11288e+08
TRUE	High	Master Protein	P13611	Versican core protein OS=Homo sapiens OX=9606 GN=VCAN PE=1 SV=3	12	VCAN	6.335e+07	5.5554e+07	3.19653e+07	7.45162e+07	1.26123e+08	9.48709e+07	3.48653e+07	6.7169e+07	2.7306e+07	2.33337e+08	1.14514e+08	4.44758e+08	5.63673e+08	2.82189e+08	1.71659e+08	3.24019e+08	1.15252e+08	4.09997e+08	1.5189e+08	1.0341e+08	3.98074e+08	5.06158e+07	1.17319e+09	2.60249e+08	1.28543e+08	8.67814e+07	2.63481e+08	1.92363e+08	2.26161e+08	7.15465e+08	1.11697e+08
TRUE	High	Master Protein	P09429	High mobility group protein B1 OS=Homo sapiens OX=9606 GN=HMGB1 PE=1 SV=3	12	HMGB1	7.07334e+08	8.93193e+08	3.45405e+08	9.27335e+08	5.31264e+08	6.41707e+08	3.42856e+08	2.83943e+08	4.22164e+08	5.91298e+08	1.38207e+08	3.59156e+08	8.54059e+07	8.713e+07	4.26987e+08	3.80276e+08	4.01041e+08	2.0285e+08	5.95589e+07	5.13432e+07	6.84892e+08	9.76153e+08	5.02017e+08	3.11949e+08	1.2753e+08	4.0405e+08	2.0803e+08	2.75596e+08	8.25335e+08	5.20905e+08	7.3414e+08
TRUE	High	Master Protein	P55196	Afadin OS=Homo sapiens OX=9606 GN=AFDN PE=1 SV=3	20	MLLT4; AFDN	2.11824e+07	1.29067e+08	1.50478e+07	1.18899e+07	1.1811e+07	1.74811e+07	2.12377e+07	6.16889e+07	2.06998e+07	2.22846e+07	2.31032e+07	4.54776e+07	4.74475e+07	1.7246e+07	1.07618e+07	3.52405e+07	2.63118e+08	2.02566e+08	3.64506e+07	8.63399e+06	5.66113e+07	2.8314e+07	3.51687e+06	1.78791e+07	2.6269e+07	1.60484e+07	2.50175e+07	1.23304e+07	2.37406e+07	1.29725e+07	1.49736e+07
TRUE	High	Master Protein	P36955	Pigment epithelium-derived factor OS=Homo sapiens OX=9606 GN=SERPINF1 PE=1 SV=4	18	SERPINF1	1.24679e+08	7.36e+07	2.28515e+08	8.65871e+07	5.76603e+07	6.32608e+07	9.73356e+07	8.34779e+07	3.51134e+08	5.42e+07	1.54417e+08	2.35821e+08	6.73727e+08	6.93974e+08	1.88715e+08	8.65278e+07	1.02419e+08	3.81502e+08	4.4025e+08	1.79028e+08	1.83285e+08	5.76207e+07	1.10651e+08	1.76504e+07	6.29499e+07	6.18847e+07	3.6854e+07	7.93173e+07	9.21012e+06	1.79562e+08	1.53758e+07
TRUE	High	Master Protein	O94788	Retinal dehydrogenase 2 OS=Homo sapiens OX=9606 GN=ALDH1A2 PE=1 SV=3	21	ALDH1A2	6.05832e+06	7.30901e+06	8.71971e+06	2.7987e+08	2.55451e+07	7.23665e+07	2.5653e+07	1.10236e+07	1.34392e+07	2.33445e+07	4.05633e+07	2.73797e+07	1.13291e+07	6.59741e+06	7.63831e+06	1.52204e+07	6.26818e+06	6.09239e+06	5.09018e+06	5.13826e+06	8.28628e+06	7.16636e+06	4.6624e+07	1.26886e+08	1.69865e+07	2.13293e+07	1.50473e+07	3.27991e+07	4.38692e+08	1.21398e+07	1.49799e+07
TRUE	High	Master Protein	P28289	Tropomodulin-1 OS=Homo sapiens OX=9606 GN=TMOD1 PE=1 SV=1	21	TMOD1	2.74484e+08	4.3828e+08	1.72833e+08	2.62908e+08	2.1691e+08	2.58711e+08	2.24447e+08	2.97037e+08	3.01346e+08	2.44061e+08	2.78654e+08	5.15247e+07	1.77201e+08	6.83776e+07	2.22332e+08	1.12388e+08	1.26263e+08	1.0752e+08	1.09829e+08	6.46132e+07	1.36877e+08	3.74794e+08	1.16797e+08	3.84253e+07	9.36989e+07	1.34766e+08	5.53799e+07	1.56356e+08	3.80077e+08	2.22668e+08	1.59748e+08
TRUE	High	Master Protein	A0A087WWU8	Tropomyosin alpha-3 chain OS=Homo sapiens OX=9606 GN=TPM3 PE=1 SV=1	9	TPM3	3.2945e+08	2.65803e+08	4.96475e+08	3.3211e+08	1.71334e+08	1.81286e+08	1.11398e+08	1.15218e+08	2.73183e+08	2.82383e+08	1.5527e+08	2.25892e+08	1.87059e+08	1.95765e+08	1.6545e+08	4.64274e+08	2.48624e+08	2.2379e+08	1.57117e+08	8.87248e+07	4.35879e+08	3.58547e+08	6.40521e+07	1.02373e+09	2.69001e+07	6.11051e+07	6.7486e+07	5.28388e+07	8.15559e+07	1.25678e+08	1.076e+08
TRUE	High	Master Protein	P01031	Complement C5 OS=Homo sapiens OX=9606 GN=C5 PE=1 SV=4	34	C5	1.67366e+07	3.40469e+07	4.03887e+07	3.43278e+07	4.19021e+07	3.19909e+07	3.43168e+07	2.20452e+08	1.57743e+07	2.60005e+07	4.023e+07	4.03371e+07	4.42137e+07	1.22141e+08	2.3638e+07	5.80703e+07	5.468e+07	1.09803e+08	8.69444e+07	9.38364e+07	3.26465e+07	3.65717e+07	6.40374e+07	4.9647e+07	6.71303e+07	4.06944e+07	1.68377e+08	5.92358e+07	3.11899e+07	5.78638e+07	2.4e+07
TRUE	High	Master Protein	Q16363	Laminin subunit alpha-4 OS=Homo sapiens OX=9606 GN=LAMA4 PE=1 SV=4	25	LAMA4	7.44814e+07	5.29839e+07	5.47803e+07	7.12227e+07	4.28222e+07	6.74068e+07	1.17241e+08	8.70413e+07	6.25466e+07	6.56506e+07	5.33769e+07	4.79607e+07	9.4526e+07	3.71011e+07	6.95646e+07	5.14706e+07	1.24512e+08	2.37774e+07	2.26432e+07	2.12742e+07	9.55461e+07	1.02002e+08	6.21298e+07	4.29312e+07	3.25063e+07	1.06186e+08	8.0798e+07	8.82502e+07	7.7591e+07	1.19572e+08	7.78182e+07
TRUE	High	Master Protein	P29762	Cellular retinoic acid-binding protein 1 OS=Homo sapiens OX=9606 GN=CRABP1 PE=1 SV=2	15	CRABP1	2.34431e+09	5.19374e+09	2.36098e+09	1.46098e+09	5.16537e+07	1.46098e+09	5.96954e+08	2.10114e+09	7.23115e+08	7.01894e+08	1.54466e+08	2.07982e+08	7.47879e+08	5.98708e+08	3.84666e+09	5.05476e+07	6.37508e+09	6.32509e+07	8.93314e+07	3.58721e+08	1.33921e+09	4.26436e+09	2.7525e+08	2.58349e+08	1.10151e+09	1.2108e+09	5.98088e+07	1.07098e+09	1.003e+09	5.00667e+08	2.17233e+09
TRUE	High	Master Protein	Q63ZY3	KN motif and ankyrin repeat domain-containing protein 2 OS=Homo sapiens OX=9606 GN=KANK2 PE=1 SV=1	24	KANK2	1.14016e+08	1.48764e+08	6.35552e+07	1.75509e+08	1.97989e+09	1.11656e+08	9.63519e+07	7.91011e+07	1.6185e+08	9.63674e+07	9.70456e+07	2.57448e+07	5.86831e+07	1.37025e+07	5.80772e+07	2.13305e+07	8.97933e+07	4.22273e+07	3.34058e+07	1.153e+07	8.10439e+07	1.39474e+08	2.73312e+08	1.01734e+08	8.35652e+07	2.09363e+08	8.36788e+07	1.66716e+08	1.34622e+08	1.44884e+08	5.73191e+07
TRUE	High	Master Protein	P00966	Argininosuccinate synthase OS=Homo sapiens OX=9606 GN=ASS1 PE=1 SV=2	21	ASS1	1.66918e+08	4.56603e+08	2.94172e+08	3.44018e+08	2.55584e+08	2.12126e+08	4.37736e+08	4.29854e+08	6.72495e+08	5.08137e+08	7.46096e+08	1.59822e+08	2.10567e+08	1.29294e+08	2.79612e+08	1.41181e+08	2.5674e+08	1.14457e+08	2.925e+08	1.64889e+08	1.79154e+08	2.12644e+08	2.63484e+08	1.5784e+08	4.95639e+08	3.55329e+08	4.20338e+08	2.94934e+08	5.93763e+08	2.64037e+08	5.89842e+08
TRUE	High	Master Protein	P09211	Glutathione S-transferase P OS=Homo sapiens OX=9606 GN=GSTP1 PE=1 SV=2	18	GSTP1	8.77523e+08	1.13386e+09	1.02802e+09	1.10874e+09	7.42616e+08	7.52781e+08	7.45861e+08	6.90944e+08	1.01137e+09	7.59386e+08	6.09338e+08	5.7691e+08	4.9887e+08	4.91259e+08	6.45512e+08	8.05124e+08	6.88832e+08	5.86476e+08	1.45867e+08	2.47895e+08	1.28932e+09	5.42645e+08	7.15073e+08	6.94008e+08	1.54031e+08	2.10895e+08	1.94309e+08	3.22206e+08	1.5453e+09	6.07234e+08	9.20261e+08
TRUE	High	Master Protein	P11717	Cation-independent mannose-6-phosphate receptor OS=Homo sapiens OX=9606 GN=IGF2R PE=1 SV=3	30	IGF2R	1.05383e+07	5.83128e+07	3.22667e+07	5.90211e+07	3.2581e+07	1.02967e+08	5.31516e+07	5.44646e+07	3.93535e+07	3.67028e+07	5.21959e+07	2.21014e+07	3.57552e+07	1.00111e+07	3.53563e+07	3.47166e+07	1.68737e+07	2.09612e+07	1.43697e+07	1.51247e+07	2.75097e+07	8.59496e+07	3.29492e+07	4.54411e+07	9.32754e+06	8.03707e+06	5.97159e+06	1.33285e+07	3.66204e+07	1.02689e+07	3.22226e+07
TRUE	High	Master Protein	P17987	T-complex protein 1 subunit alpha OS=Homo sapiens OX=9606 GN=TCP1 PE=1 SV=1	27	TCP1	1.78563e+08	2.3e+08	1.47331e+08	2.2976e+08	1.52742e+08	1.88636e+08	1.09884e+08	1.10902e+08	1.8309e+08	2.26887e+08	1.56842e+08	9.40289e+07	1.50835e+08	1.35604e+08	1.43927e+08	1.35762e+08	1.47264e+08	1.2818e+08	1.00694e+08	5.53085e+07	2.62673e+08	2.01783e+08	2.24778e+08	2.43738e+08	1.06519e+08	2.08897e+08	1.742e+08	1.92e+08	2.41562e+08	1.58793e+08	3.15866e+08
TRUE	High	Master Protein	P00352	Retinal dehydrogenase 1 OS=Homo sapiens OX=9606 GN=ALDH1A1 PE=1 SV=2	22	ALDH1A1	3.34037e+07	4.8004e+07	1.09791e+08	5.80738e+07	7.99081e+07	6.562e+07	2.02694e+07	2.62213e+07	1.12004e+07	3.58203e+07	6.00063e+07	9.0511e+08	5.24647e+07	3.26469e+07	3.28519e+07	5.07665e+07	3.26981e+07	2.40198e+07	6.52041e+07	5.89546e+07	2.17768e+07	1.81645e+07	5.03961e+07	5.50824e+07	2.16866e+08	1.33504e+08	6.3329e+07	1.04902e+08	1.9579e+08	4.85135e+07	4.10499e+07
TRUE	High	Master Protein	E7EX90	Dynactin subunit 1 OS=Homo sapiens OX=9606 GN=DCTN1 PE=1 SV=1	7		3.19566e+06	1.86309e+06	2.35946e+06	191594	30452.9	596970	60983.8	234506	46822.7	144148	25526.6	185069	95324.4	161442	70345.2	17708.9	193829	161977	187321	167329	89018.1	176846	212635	114664	41940	193329	154119	78788.1	52915.7	120200	73230.8
TRUE	High	Master Protein	P40227	T-complex protein 1 subunit zeta OS=Homo sapiens OX=9606 GN=CCT6A PE=1 SV=3	22	CCT6A	1.39181e+08	1.84733e+08	1.34169e+08	1.48844e+08	1.27126e+08	1.55386e+08	1.07017e+08	9.90624e+07	1.50814e+08	1.67811e+08	1.20354e+08	3.04132e+08	2.30236e+08	8.22719e+07	1.99854e+08	1.64012e+08	1.21874e+08	6.92396e+07	7.1427e+07	4.57028e+07	3.75531e+08	1.85489e+08	1.84301e+08	1.53207e+09	2.122e+08	3.73815e+08	5.664e+08	2.73321e+08	2.70983e+08	2.0865e+08	4.70446e+08
TRUE	High	Master Protein	Q12797	Aspartyl/asparaginyl beta-hydroxylase OS=Homo sapiens OX=9606 GN=ASPH PE=1 SV=3	25	ASPH	1.45867e+08	1.41622e+08	7.44787e+07	1.34668e+08	6.95353e+07	2.01574e+08	7.68914e+07	6.99725e+07	1.07244e+08	1.59362e+08	1.17588e+08	9.54729e+07	7.16865e+07	3.72255e+07	1.26285e+08	1.26358e+08	4.85601e+07	6.66183e+07	1.68898e+07	2.48655e+07	1.44271e+08	1.16052e+08	7.82856e+07	9.83453e+07	7.72845e+07	6.59896e+07	7.81086e+07	9.63447e+07	7.30837e+07	4.3911e+07	7.49041e+07
TRUE	High	Master Protein	H0YK48	Tropomyosin alpha-1 chain OS=Homo sapiens OX=9606 GN=TPM1 PE=1 SV=1	0	TPM1	5.91737e+07	1.63666e+08	5.6412e+06	5.53566e+07	8.62117e+07	6.47295e+07	4.33625e+07	6.1443e+07	1.78652e+08	5.64033e+07	9.72982e+07	3.04724e+07	3.89028e+07	2.28256e+07	1.17075e+08	6.03765e+07	1.94775e+07	1.05074e+08	2.19536e+07	4.73464e+06	1.12396e+08	1.12147e+08	2.32717e+07	4.76296e+07	1.71924e+07	3.27605e+07	1.57861e+07	1.62065e+07	2.06219e+07	2.37468e+07	1.11255e+07
TRUE	High	Master Protein	Q8N8S7	Protein enabled homolog OS=Homo sapiens OX=9606 GN=ENAH PE=1 SV=2	19	ENAH	3.50637e+08	1.06312e+08	4.91217e+07	3.98638e+08	6.05942e+07	3.40017e+08	7.46105e+07	8.51143e+07	1.92838e+08	3.87214e+08	9.22026e+07	1.94008e+08	1.25885e+08	4.2084e+07	2.49102e+08	1.99328e+08	5.37596e+07	4.80065e+07	1.69401e+07	1.90444e+07	1.28282e+08	2.4855e+08	6.91373e+07	2.27247e+08	1.96014e+07	4.66951e+07	3.36341e+07	2.67965e+07	1.45907e+08	1.65428e+08	1.4218e+08
TRUE	High	Master Protein	Q01813	ATP-dependent 6-phosphofructokinase, platelet type OS=Homo sapiens OX=9606 GN=PFKP PE=1 SV=2	20	PFKP	4.28944e+07	2.38035e+07	1.20882e+07	1.0737e+07	8.9713e+07	2.02149e+07	1.59377e+08	1.69476e+08	5.57835e+06	2.9707e+07	5.3254e+07	3.04151e+07	8.111e+07	5.11226e+07	3.7666e+07	5.75579e+07	1.35707e+08	4.05762e+07	1.50831e+07	5.01286e+06	8.03461e+07	5.98279e+07	1.42644e+08	1.35222e+07	7.53833e+07	4.42156e+08	4.41773e+08	3.56453e+08	2.83278e+08	2.19835e+08	8.30476e+07
TRUE	High	Master Protein	Q13263	Transcription intermediary factor 1-beta OS=Homo sapiens OX=9606 GN=TRIM28 PE=1 SV=5	22	TRIM28	1.50843e+08	1.27356e+08	5.86457e+07	1.06964e+08	4.27546e+07	1.14753e+08	5.70879e+07	6.912e+07	5.26585e+07	1.16869e+08	7.1613e+07	2.34312e+08	5.68529e+07	2.85761e+07	5.24989e+07	1.31026e+08	5.19288e+07	2.31848e+07	1.8677e+07	1.45368e+07	2.41841e+08	4.05352e+07	1.25303e+08	1.32053e+07	1.71773e+07	7.47668e+07	3.68642e+07	7.84088e+07	9.93804e+07	7.73206e+07	8.25664e+07
TRUE	High	Master Protein	P27348	14-3-3 protein theta OS=Homo sapiens OX=9606 GN=YWHAQ PE=1 SV=1	13	YWHAQ	2.84212e+08	369165937	2.10301e+08	5.17391e+08	3.15626e+08	4.12747e+08	2.52632e+08	2.98532e+08	5.23863e+08	1.61973e+08	3.89225e+08	3.39669e+08	3.07099e+08	5.90727e+07	4.12775e+08	3.42118e+08	1.41229e+08	1.51584e+08	4.22513e+07	3.55946e+07	5.69275e+08	4.70916e+08	1.26179e+08	4.93393e+07	4.15961e+07	7.02674e+07	4.60115e+07	7.57423e+07	1.39905e+08	8.45324e+07	1.67698e+08
TRUE	High	Master Protein	O14639	Actin-binding LIM protein 1 OS=Homo sapiens OX=9606 GN=ABLIM1 PE=1 SV=3	4	ABLIM1	1.79549e+08	4.91486e+07	2.3302e+07	2.18018e+08	5.07281e+07	1.67285e+08	2.50125e+07	4.1011e+07	6.43146e+07	2.90547e+08	5.95054e+07	3.90402e+07	2.91701e+07	9.57086e+06	5.1473e+07	4.22498e+07	4.34917e+07	1.55982e+07	4.62732e+06	2.59956e+07	8.47856e+07	1.03533e+08	2.8548e+07	4.61079e+07	1.63347e+07	2.2573e+07	2.33955e+07	1.38037e+07	1.13667e+08	4.72787e+07	2.04382e+08
TRUE	High	Master Protein	P53675	Clathrin heavy chain 2 OS=Homo sapiens OX=9606 GN=CLTCL1 PE=1 SV=2	1	CLTCL1	90518.9	30783.2	93215.5	105396	197970	84761.9	6925.31	116809	147571	28309.4	150267	118275	75257.8	35011.6	268724	119631	1.1472e+06	85451.9	20034.2	41961.1	398265	1.45566e+06	45491.8	133497	111169	1.86081e+06	7.03188e+06	201910	1.17566e+06	696174	129028
TRUE	High	Master Protein	P31946	14-3-3 protein beta/alpha OS=Homo sapiens OX=9606 GN=YWHAB PE=1 SV=3	12	YWHAB	2.16679e+08	2.17858e+08	2.09654e+08	6.02445e+08	3.55873e+08	3.05652e+08	2.15474e+08	2.19548e+08	2.8531e+08	3.91882e+08	1.32391e+08	2.12419e+08	9.2279e+07	3.94829e+07	1.98781e+08	1.99671e+08	4.79442e+07	7.98517e+07	1.3914e+07	3.67483e+07	3.03234e+08	2.06333e+08	1.1774e+08	2.96074e+07	5.39374e+07	1.58006e+08	1.69511e+08	7.0988e+07	9.24629e+07	4.91198e+07	1.78823e+08
TRUE	High	Master Protein	Q05639	Elongation factor 1-alpha 2 OS=Homo sapiens OX=9606 GN=EEF1A2 PE=1 SV=1	8	EEF1A2	1.7166e+08	6.03943e+06	7.19967e+06	1.03829e+07	2.26321e+06	1.01129e+06	8.7348e+06	1.84362e+06	5.84433e+06	1.42307e+06	1.08546e+07	779254	3.06289e+06	1.41565e+06	1.24239e+06	3.6428e+07	2.33893e+06	1.72601e+06	4.23358e+06	2.94233e+06	1.35643e+06	783473	2.61749e+06	803386	3.07892e+06	4.00558e+06	1.00555e+07	887128	1.11362e+06	649365	1.04846e+06
TRUE	High	Master Protein	Q04637	Eukaryotic translation initiation factor 4 gamma 1 OS=Homo sapiens OX=9606 GN=EIF4G1 PE=1 SV=4	22	EIF4G1	1.03439e+08	7.37537e+07	4.17385e+07	1.30482e+08	4.12352e+07	9.93547e+07	3.58345e+07	4.28944e+07	9.29838e+07	9.90562e+07	9.6072e+07	4.2578e+07	2.35886e+07	1.50145e+07	7.92253e+07	1.5491e+08	1.61391e+08	2.2052e+07	2.04196e+07	5.86884e+07	1.87397e+08	1.11168e+08	6.76545e+07	7.72785e+07	1.55477e+07	2.35343e+07	1.6682e+07	1.52044e+07	7.1083e+07	2.38091e+07	5.23072e+07
TRUE	High	Master Protein	P01834	Immunoglobulin kappa constant OS=Homo sapiens OX=9606 GN=IGKC PE=1 SV=2	3	IGKC	1.43291e+09	1.0353e+09	2.04309e+09	2.69613e+09	2.01926e+09	1.58445e+09	2.18597e+09	2.31949e+09	1.66452e+09	1.03221e+09	2.57787e+09	3.04464e+09	1.68198e+09	7.81754e+09	1.36296e+09	9.77738e+08	1.26514e+09	6.34212e+09	5.96311e+09	4.61616e+09	1.46286e+09	1.102e+09	6.14606e+08	7.89625e+08	8.29163e+08	1.67666e+08	4.24041e+08	6.02693e+08	3.27838e+08	6.4465e+08	3.68728e+08
TRUE	High	Master Protein	P49189	4-trimethylaminobutyraldehyde dehydrogenase OS=Homo sapiens OX=9606 GN=ALDH9A1 PE=1 SV=3	22	ALDH9A1	2.45656e+08	2.98636e+08	3.31602e+08	4.07275e+08	4.15617e+08	2.21679e+08	2.54691e+08	1.25302e+08	2.6491e+08	1.6983e+08	1.60332e+08	1.92441e+08	1.62349e+08	1.16178e+08	1.93355e+08	2.62499e+08	6.17129e+08	1.60417e+08	1.39349e+08	1.56906e+08	3.64634e+08	1.01282e+09	1.5163e+08	5.13824e+08	3.62394e+08	2.88479e+08	6.23796e+08	3.79065e+08	6.93573e+08	2.57647e+08	4.88981e+08
TRUE	High	Master Protein	P61764	Syntaxin-binding protein 1 OS=Homo sapiens OX=9606 GN=STXBP1 PE=1 SV=1	6	STXBP1	4.93131e+07	5.24669e+07	2.71765e+07	3.97303e+07	7.22326e+07	2.82839e+07	1.27703e+08	3.61077e+07	3.37012e+07	4.83546e+07	5.76151e+07	1.17871e+08	2.3632e+07	4.33507e+07	3.8878e+07	3.71596e+08	3.73822e+07	3.48115e+07	1.38103e+08	7.21428e+07	4.41391e+07	4.88862e+07	1.75733e+07	7.56859e+07	2.87374e+08	2.48414e+08	9.27188e+08	1.34798e+08	6.86612e+07	8.85132e+08	7.45316e+07
TRUE	High	Master Protein	Q15436	Protein transport protein Sec23A OS=Homo sapiens OX=9606 GN=SEC23A PE=1 SV=2	17	SEC23A	1.766e+08	1.52214e+08	1.09978e+08	1.96521e+08	7.96193e+07	1.50621e+08	8.46431e+07	7.78835e+07	1.45879e+08	2.05296e+08	1.41179e+08	8.45288e+07	1.86021e+08	7.38104e+07	6.46916e+07	2.26678e+08	1.58828e+08	3.12929e+07	2.35804e+07	2.21027e+08	2.15654e+08	1.66498e+08	3.0181e+07	2.04439e+07	2.29797e+07	1.38392e+07	7.45607e+07	1.42324e+07	1.1617e+08	1.9862e+07	4.09303e+07
TRUE	High	Master Protein	Q9Y2H5	Pleckstrin homology domain-containing family A member 6 OS=Homo sapiens OX=9606 GN=PLEKHA6 PE=1 SV=4	6	PLEKHA6	1.41331e+08	8.24693e+07	3.6187e+07	8.82579e+07	7.36792e+07	7.30618e+07	4.2325e+07	3.00878e+07	1.07727e+08	1.20251e+08	1.2088e+08	2.06494e+07	1.41249e+07	1.63998e+08	3.63466e+07	2.34261e+07	6.02119e+07	2.06499e+07	8.17748e+07	8.70058e+06	6.14168e+07	4.14566e+07	1.29368e+08	2.68152e+08	7.68033e+07	2.11128e+07	1.26082e+08	5.03267e+07	7.00963e+07	2.8197e+07	1.72432e+08
TRUE	High	Master Protein	O00410	Importin-5 OS=Homo sapiens OX=9606 GN=IPO5 PE=1 SV=4	24	IPO5	1.88894e+08	1.22315e+08	8.79302e+07	1.30409e+08	8.88417e+07	1.4023e+08	5.5668e+07	9.24564e+07	9.64468e+07	7.55328e+07	9.31776e+07	1.46728e+08	3.5976e+07	1.99511e+07	3.57947e+08	1.5816e+08	5.78061e+07	5.18681e+07	2.14742e+07	2.55348e+07	1.29817e+08	9.9256e+07	8.22451e+07	3.30025e+07	1.28544e+07	2.58916e+07	4.02561e+07	1.73212e+07	6.29366e+07	2.68408e+07	3.96341e+07
TRUE	High	Master Protein	O15031	Plexin-B2 OS=Homo sapiens OX=9606 GN=PLXNB2 PE=1 SV=3	28	PLXNB2	8.80737e+07	9.3157e+07	3.57529e+07	9.12127e+07	5.27021e+07	5.5521e+07	6.68485e+07	6.69945e+07	7.06724e+07	6.95347e+07	5.22478e+07	4.13569e+07	5.02353e+07	1.91621e+07	3.81903e+07	6.44918e+07	3.68995e+07	3.18512e+07	1.47046e+07	1.54887e+07	6.29633e+07	4.749e+07	4.27816e+07	2.08138e+08	3.58253e+07	4.40644e+07	3.02519e+07	5.92863e+07	8.94208e+07	4.70015e+07	1.74099e+07
TRUE	High	Master Protein	P29590	Protein PML OS=Homo sapiens OX=9606 GN=PML PE=1 SV=3	26	PML	1.57486e+08	1.38167e+08	7.66281e+07	1.39892e+08	9.73654e+07	2.12785e+08	4.67889e+07	7.66338e+07	1.45038e+08	1.48681e+08	1.27102e+08	6.86578e+07	7.16311e+07	5.71536e+07	1.62631e+08	2.00765e+08	3.54505e+07	4.59662e+07	3.00404e+07	6.48763e+06	3.29437e+08	1.06785e+08	4.82998e+07	1.04051e+08	5.62934e+07	6.13268e+07	3.93055e+07	6.44967e+07	9.26665e+07	5.9897e+07	4.56347e+07
TRUE	High	Master Protein	P09936	Ubiquitin carboxyl-terminal hydrolase isozyme L1 OS=Homo sapiens OX=9606 GN=UCHL1 PE=1 SV=2	13	UCHL1	3.174e+08	3.93182e+08	1.41013e+08	2.81293e+07	3.43785e+08	2.9941e+08	1.12785e+08	8.4584e+07	3.93765e+08	3.59194e+08	2.5362e+08	3.77281e+07	1.89154e+08	1.57627e+08	1.75058e+08	2.46504e+08	3.01654e+07	1.44251e+08	6.58575e+07	2.08062e+07	6.76205e+07	1.28363e+08	6.41228e+08	2.20175e+08	1.35056e+08	2.65267e+08	7.59192e+08	1.63574e+08	3.39173e+08	1.2353e+08	4.0916e+07
TRUE	High	Master Protein	O15439	Multidrug resistance-associated protein 4 OS=Homo sapiens OX=9606 GN=ABCC4 PE=1 SV=3	25	ABCC4	1.12125e+07	1.62425e+08	1.67278e+07	5.50835e+06	8.01426e+06	1.13166e+07	6.54058e+06	7.72088e+06	5.76226e+06	8.10821e+06	6.96413e+06	1.15865e+07	4.86399e+06	4.20837e+06	6.68464e+06	1.05802e+07	1.56381e+07	6.97162e+06	3.66028e+06	9.21304e+06	1.08528e+07	3.02049e+07	1.6678e+07	1.26597e+07	3.42375e+06	9.91571e+06	3.43133e+06	5.62051e+06	2.51733e+07	1.00756e+07	9.55637e+06
TRUE	High	Master Protein	P07451	Carbonic anhydrase 3 OS=Homo sapiens OX=9606 GN=CA3 PE=1 SV=3	15	CA3	1.78015e+07	4.16827e+07	3.21309e+07	1.70013e+08	1.63338e+07	1.15707e+09	1.50555e+07	4.28489e+07	2.2018e+07	1.467e+07	2.09562e+07	3.2121e+07	3.07414e+07	2.84022e+07	6.94217e+08	1.80556e+07	3.19439e+07	1.78392e+07	2.68427e+07	3.39739e+07	1.37167e+09	5.01714e+08	1.50293e+07	5.74822e+06	3.46266e+07	1.29054e+07	2.22416e+07	2.34583e+07	1.76113e+07	2.42468e+07	1.36826e+09
TRUE	High	Master Protein	Q99714	3-hydroxyacyl-CoA dehydrogenase type-2 OS=Homo sapiens OX=9606 GN=HSD17B10 PE=1 SV=3	18	HSD17B10	2.80699e+08	2.56832e+08	1.49203e+08	2.75516e+08	1.87464e+08	2.99538e+08	1.41974e+08	1.00638e+08	1.35165e+08	1.72074e+08	1.25448e+08	5.34937e+07	5.8834e+07	4.83437e+07	8.07802e+07	5.96803e+07	9.42727e+07	5.18571e+07	1.34321e+07	1.23707e+07	1.96259e+08	2.41776e+08	8.53001e+07	2.68693e+07	4.34272e+07	5.63811e+07	3.22848e+07	8.7977e+07	1.11633e+08	6.707e+07	6.59295e+07
TRUE	High	Master Protein	P28482	Mitogen-activated protein kinase 1 OS=Homo sapiens OX=9606 GN=MAPK1 PE=1 SV=3	14	MAPK1	7.24362e+07	8.53588e+07	8.75861e+07	1.05625e+08	7.83508e+07	7.45538e+07	4.89098e+07	4.41371e+07	8.86083e+07	8.18186e+07	6.96001e+07	6.03058e+07	6.82624e+07	2.5672e+07	6.98941e+07	8.56575e+07	5.1421e+07	4.00937e+07	1.87897e+07	4.64941e+07	1.59297e+08	8.3977e+07	5.16636e+07	1.13109e+08	3.67038e+07	1.58541e+08	2.59773e+08	1.10513e+08	1.80856e+08	7.90033e+07	1.62167e+08
TRUE	High	Master Protein	Q8IUX7	Adipocyte enhancer-binding protein 1 OS=Homo sapiens OX=9606 GN=AEBP1 PE=1 SV=1	19	AEBP1	7.31188e+07	9.91766e+06	5.7405e+07	1.65862e+07	1.6029e+07	3.45962e+07	5.94006e+07	2.58051e+07	1.96155e+07	4.47912e+07	1.49684e+07	5.75023e+07	6.65056e+07	1.17778e+08	1.15639e+07	3.65103e+07	7.79315e+07	2.79076e+07	1.32989e+08	1.11171e+08	3.17273e+07	3.22555e+07	7.4152e+07	2.69505e+08	6.17855e+07	4.06784e+07	5.94852e+07	4.05196e+07	3.49761e+07	3.63002e+07	4.13381e+07
TRUE	High	Master Protein	H0YNC7	Tropomyosin alpha-1 chain (Fragment) OS=Homo sapiens OX=9606 GN=TPM1 PE=1 SV=1	1		121350	78335.6	122176	149268	2.76385e+06	1.05161e+07	5.22536e+06	64909.1	7.90625e+06	16806.9	312174	46548.5	210914	2.87585e+06	7.72545e+06	37283	78483.8	3273.75	41156.7	10708.6	123768	148466	130654	2078.78	2.97954e+07	4.66701e+07	2.76418e+08	1.61592e+08	9.72621e+07	299363	6.34472e+07
TRUE	High	Master Protein	O60664	Perilipin-3 OS=Homo sapiens OX=9606 GN=PLIN3 PE=1 SV=3	15	PLIN3	1.37242e+08	1.98459e+08	9.5979e+07	2.54487e+08	1.87465e+08	8.65379e+07	7.61985e+07	1.41413e+08	2.21082e+08	1.71881e+08	1.02849e+08	2.81387e+07	7.25586e+07	2.38631e+07	3.79668e+07	1.23449e+08	4.43086e+07	3.87328e+07	2.67393e+07	1.29583e+07	8.20403e+07	7.12475e+07	2.66379e+07	2.45819e+07	7.46069e+06	3.16082e+07	6.31139e+07	4.88982e+07	4.48362e+07	1.04247e+08	5.3054e+07
TRUE	High	Master Protein	P07197	Neurofilament medium polypeptide OS=Homo sapiens OX=9606 GN=NEFM PE=1 SV=3	18	NEFM	1.47567e+07	5.40121e+06	6.31235e+06	1.53125e+07	7.28152e+07	5.00264e+07	6.13823e+06	5.32722e+06	1.01683e+07	7.01463e+06	2.81609e+06	2.6034e+07	1.23471e+07	9.50545e+06	8.4977e+06	1.26474e+08	5.9241e+06	4.17441e+07	8.5844e+06	2.57156e+06	2.5505e+07	1.50024e+07	2.22988e+07	4.24523e+07	1.25633e+07	1.28441e+07	4.51428e+08	2.62201e+07	3.21844e+07	6.20393e+06	6.56331e+06
TRUE	High	Master Protein	P23246	Splicing factor, proline- and glutamine-rich OS=Homo sapiens OX=9606 GN=SFPQ PE=1 SV=2	18	SFPQ	4.79162e+08	6.86368e+08	2.54284e+08	5.05641e+08	7.41049e+08	6.10378e+08	3.12236e+08	3.16819e+08	6.32226e+08	7.07428e+08	1.62801e+08	1.52415e+08	1.29608e+08	2.5923e+08	1.72565e+08	2.41328e+08	1.70921e+08	1.03912e+08	7.29043e+07	2.47592e+08	2.81151e+08	4.74863e+08	7.54354e+07	1.94376e+08	3.2527e+08	3.88482e+08	3.33904e+08	6.88765e+08	7.10155e+08	4.12075e+08	7.82472e+08
TRUE	High	Master Protein	P00505	Aspartate aminotransferase, mitochondrial OS=Homo sapiens OX=9606 GN=GOT2 PE=1 SV=3	20	GOT2	2.38211e+08	1.85016e+08	9.07609e+07	3.20271e+08	1.14511e+08	2.63113e+08	1.08093e+08	1.55413e+08	8.30667e+07	1.61036e+08	9.68615e+07	1.33237e+08	1.26524e+08	3.44619e+07	1.99569e+08	2.74411e+08	6.63592e+07	1.13181e+08	3.68598e+07	2.26817e+07	1.86873e+08	2.25087e+08	8.7143e+07	3.13258e+07	1.0288e+08	2.8884e+08	4.16618e+08	2.36842e+08	3.49948e+08	1.45775e+08	2.01555e+08
TRUE	High	Master Protein	P54652	Heat shock-related 70 kDa protein 2 OS=Homo sapiens OX=9606 GN=HSPA2 PE=1 SV=1	8	HSPA2	2.05154e+07	2.84961e+07	2.42478e+06	1.33538e+07	4.27769e+07	1.19959e+07	7.14059e+06	4.73871e+06	1.20146e+07	1.44379e+07	4.40626e+07	4.09062e+06	2.70612e+07	1.67115e+07	1.08701e+07	4.92497e+07	2.13487e+07	1.91563e+07	2.51676e+07	1.39029e+06	1.38764e+07	1.25067e+07	5.24463e+07	1.16165e+06	3.19928e+08	6.54536e+07	3.41008e+07	4.11686e+07	1.37382e+08	6.85615e+07	1.15507e+08
TRUE	High	Master Protein	P13645	Keratin, type I cytoskeletal 10 OS=Homo sapiens OX=9606 GN=KRT10 PE=1 SV=6	21	KRT10	5.59397e+07	5.60143e+07	1.91987e+08	6.40945e+07	4.68439e+07	4.75363e+07	6.21104e+07	2.11507e+08	7.88885e+07	5.76808e+07	5.00204e+07	4.25811e+07	9.92353e+07	2.4941e+07	9.4012e+07	2.7552e+08	5.13834e+07	7.36887e+07	4.95609e+07	9.09205e+07	2.93799e+08	7.99285e+07	5.84405e+08	1.98647e+08	3.25193e+08	1.48734e+08	2.72554e+08	2.67531e+08	2.13417e+08	1.67894e+08	3.11498e+08
TRUE	High	Master Protein	Q06323	Proteasome activator complex subunit 1 OS=Homo sapiens OX=9606 GN=PSME1 PE=1 SV=1	19	PSME1	2.01982e+08	3.50596e+08	2.12661e+08	4.5773e+08	1.87088e+08	1.82784e+08	1.01116e+08	1.32337e+08	2.34198e+08	2.45015e+08	1.83926e+08	2.0568e+08	1.66891e+08	1.01862e+08	2.73724e+08	2.86006e+08	1.4894e+08	9.32146e+07	9.63614e+07	7.26303e+07	3.14524e+08	2.62932e+08	5.91813e+08	1.96828e+08	8.8001e+07	1.19634e+08	1.47568e+08	5.31392e+07	3.54456e+08	1.38186e+08	2.05491e+08
TRUE	High	Master Protein	Q9BX66	Sorbin and SH3 domain-containing protein 1 OS=Homo sapiens OX=9606 GN=SORBS1 PE=1 SV=3	27	SORBS1	1.75924e+08	1.21226e+08	1.35253e+07	2.65071e+07	1.7539e+08	6.39425e+07	4.72991e+07	8.8505e+07	4.76807e+07	5.10784e+07	4.77606e+07	1.72681e+07	2.45123e+07	5.51647e+07	1.53225e+07	1.95277e+07	7.36856e+07	2.47911e+07	5.49349e+07	4.41966e+06	2.14394e+07	9.27381e+07	6.14406e+07	5.55777e+07	4.98579e+07	7.98197e+07	3.79528e+07	8.08047e+07	5.72393e+07	3.65162e+07	3.48126e+07
TRUE	High	Master Protein	O00264	Membrane-associated progesterone receptor component 1 OS=Homo sapiens OX=9606 GN=PGRMC1 PE=1 SV=3	17	PGRMC1	1.16643e+08	5.22257e+08	2.19789e+08	6.72292e+08	2.68914e+08	3.46976e+08	2.34266e+08	4.62135e+08	1.35913e+08	2.83999e+08	1.09797e+08	1.31698e+08	1.70172e+08	2.51115e+07	2.24639e+08	2.18279e+08	2.12126e+08	6.41607e+07	1.56715e+07	3.22083e+07	4.48592e+08	2.63843e+08	2.43556e+08	2.87609e+08	1.67333e+08	2.80241e+08	1.18229e+08	2.90244e+08	1.60927e+08	4.78568e+07	2.09713e+08
TRUE	High	Master Protein	Q02818	Nucleobindin-1 OS=Homo sapiens OX=9606 GN=NUCB1 PE=1 SV=4	20	NUCB1	1.43396e+08	1.38003e+08	3.40681e+07	1.28417e+08	7.77477e+07	1.69904e+08	6.58164e+07	7.23021e+07	6.8185e+07	1.16459e+08	5.74275e+07	4.52509e+07	3.05798e+07	1.27638e+08	5.64958e+07	2.97573e+07	1.19668e+08	2.39014e+07	2.57611e+07	1.73129e+07	6.70822e+07	2.47336e+08	9.99601e+07	9.76853e+07	3.1296e+07	5.57609e+07	2.91476e+07	4.99207e+07	1.08302e+08	8.70068e+07	1.44879e+08
TRUE	High	Master Protein	A0A024R4E5	High density lipoprotein binding protein (Vigilin), isoform CRA_a OS=Homo sapiens OX=9606 GN=HDLBP PE=1 SV=1	4	HDLBP	1.09754e+07	8448844	2.45724e+06	1.96527e+07	3.2955e+06	9.16156e+06	3.31242e+06	6.61587e+06	1.14328e+07	1.01444e+07	5.64685e+06	1.355e+06	996215	93120.6	1.2417e+06	8.71948e+06	3.73044e+06	925568	24650.8	1.32029e+06	1.6178e+07	5.95969e+06	6.75531e+07	1.19251e+07	151066	53885.9	30481.8	89902.5	140354	67295.8	22020.4
TRUE	High	Master Protein	Q9H4G0	Band 4.1-like protein 1 OS=Homo sapiens OX=9606 GN=EPB41L1 PE=1 SV=2	10	EPB41L1	1.05166e+08	5.95805e+07	3.21996e+07	5.03018e+07	2.84995e+07	5.19894e+07	2.78911e+07	2.13096e+07	3.43103e+07	3.49054e+07	3.68608e+07	5.58711e+07	3.78539e+07	1.77184e+07	4.22089e+07	2.36434e+07	3.92806e+07	5.19213e+07	4.01235e+07	4.51908e+06	7.30392e+07	3.72486e+07	2.09451e+07	1.04538e+07	9.9137e+06	1.25912e+08	2.92453e+07	1.22135e+08	5.88562e+07	6.41051e+07	1.17231e+07
TRUE	High	Master Protein	Q13838	Spliceosome RNA helicase DDX39B OS=Homo sapiens OX=9606 GN=DDX39B PE=1 SV=1	9	DDX39B	3.09409e+08	4.29679e+08	1.67042e+08	4.56e+08	2.54638e+08	2.70168e+08	1.59055e+08	1.70472e+08	2.51761e+08	3.66773e+08	2.16068e+08	1.76153e+08	1.99798e+08	9.57766e+07	2.76598e+08	4.25982e+08	1.94863e+08	1.59481e+08	5.52065e+07	3.3231e+07	5.94669e+08	3.78238e+08	2.97605e+08	2.1161e+08	8.48243e+07	2.54247e+08	2.09817e+08	1.80141e+08	5.0368e+08	2.30407e+08	4.48515e+08
TRUE	High	Master Protein	P36776	Lon protease homolog, mitochondrial OS=Homo sapiens OX=9606 GN=LONP1 PE=1 SV=2	27	LONP1	9.27141e+07	1.2251e+08	3.69075e+07	9.88551e+07	5.91722e+07	1.02209e+08	3.91349e+07	4.26554e+07	5.2309e+07	5.35135e+07	5.69883e+07	3.22814e+07	4.10505e+07	1.83212e+07	4.18721e+07	6.95496e+07	3.80795e+07	2.07114e+07	4.18279e+06	1.37875e+07	2.94056e+08	2.68284e+07	2.82027e+07	6.94599e+06	3.15616e+07	7.56242e+07	3.51206e+07	1.64687e+08	8.95302e+07	6.86663e+07	3.58629e+07
TRUE	High	Master Protein	O75165	DnaJ homolog subfamily C member 13 OS=Homo sapiens OX=9606 GN=DNAJC13 PE=1 SV=5	34	DNAJC13	7.50674e+07	9.87079e+07	5.42346e+07	1.69563e+08	6.37271e+07	8.39877e+07	6.56563e+07	5.25391e+07	1.08861e+08	1.47529e+08	8.90727e+07	8.51568e+07	3.79522e+07	5.00873e+07	8.14312e+07	7.89678e+07	2.7601e+07	5.57536e+07	1.04752e+07	4.23594e+07	2.44324e+08	6.39354e+07	4.91893e+07	2.22441e+07	5.18053e+07	9.32012e+07	2.288e+07	6.74696e+07	6.46449e+07	8.58698e+07	3.57782e+07
TRUE	High	Master Protein	P17174	Aspartate aminotransferase, cytoplasmic OS=Homo sapiens OX=9606 GN=GOT1 PE=1 SV=3	19	GOT1	1.39272e+08	1.00463e+08	4.71825e+07	1.93431e+08	1.34329e+08	1.26911e+08	7.41041e+07	2.92389e+08	1.0279e+08	1.83106e+08	7.98646e+07	1.0414e+08	7.9245e+07	5.00525e+07	1.06678e+08	1.82521e+08	4.24903e+07	9.42135e+07	2.10091e+07	2.53152e+07	5.41491e+07	1.72259e+08	7.83368e+07	6.45731e+07	2.97725e+08	1.86649e+08	6.13037e+08	1.33531e+08	4.634e+08	1.72572e+08	3.93144e+08
TRUE	High	Master Protein	P39060	Collagen alpha-1(XVIII) chain OS=Homo sapiens OX=9606 GN=COL18A1 PE=1 SV=5	19	COL18A1	7.37091e+07	6.83014e+07	6.53537e+07	6.27557e+07	5.97705e+07	8.49124e+07	1.54909e+08	1.29153e+08	4.97146e+07	3.61816e+07	7.10852e+07	7.05875e+07	2.16158e+08	1.10745e+08	7.87074e+07	2.87687e+08	6.24949e+07	4.54879e+07	3.8015e+07	3.61107e+07	1.13264e+08	4.72642e+07	7.25589e+07	1.73485e+08	1.59157e+08	2.8149e+08	4.49823e+08	5.02466e+08	5.12144e+07	7.50849e+07	7.06044e+07
TRUE	High	Master Protein	P35232	Prohibitin OS=Homo sapiens OX=9606 GN=PHB PE=1 SV=1	17	PHB	3.6279e+08	2.31131e+08	1.55415e+08	3.71837e+08	1.96887e+08	3.76845e+08	1.46206e+08	1.61984e+08	1.30188e+08	1.93674e+08	1.28428e+08	1.69229e+08	1.35736e+08	9.3787e+07	2.29435e+08	3.69309e+08	2.27102e+08	8.83436e+07	5.16577e+07	4.49572e+07	5.31734e+08	3.2503e+08	4.87109e+08	3.89336e+07	1.58973e+08	2.85076e+08	1.43734e+08	2.3364e+08	2.88644e+08	1.64223e+08	2.50334e+08
TRUE	High	Master Protein	P05787	Keratin, type II cytoskeletal 8 OS=Homo sapiens OX=9606 GN=KRT8 PE=1 SV=7	22	KRT8	6.06789e+06	6.92759e+06	2.2714e+07	2.09612e+07	7.0832e+06	7.38155e+08	1.52304e+07	1.91193e+07	1.33534e+07	1.37337e+07	9.83237e+06	6.33506e+08	2.25833e+07	8.64634e+07	2.73726e+07	1.70655e+07	5.60663e+07	1.04743e+07	1.59886e+07	6.34383e+07	5.31222e+07	1.97288e+07	2.684e+08	5.26652e+07	2.5813e+07	3.3149e+07	6.65501e+07	2.04824e+07	4.16122e+07	5.18515e+07	1.10054e+08
TRUE	High	Master Protein	P63241	Eukaryotic translation initiation factor 5A-1 OS=Homo sapiens OX=9606 GN=EIF5A PE=1 SV=2	13	EIF5A	5.43697e+08	4.18749e+08	2.8876e+08	6.69801e+08	2.52761e+08	4.55263e+08	1.86608e+08	1.86925e+08	3.61585e+08	3.45822e+08	3.50315e+08	1.11867e+08	3.23496e+08	1.24738e+08	3.60025e+08	2.7428e+08	1.90415e+08	1.80426e+08	9.67574e+07	8.08262e+07	4.46085e+08	3.74515e+08	9.5212e+07	5.43528e+07	1.57695e+08	1.34626e+08	1.97011e+08	1.7012e+08	4.00401e+08	2.2193e+08	3.49779e+08
TRUE	High	Master Protein	P21796	Voltage-dependent anion-selective channel protein 1 OS=Homo sapiens OX=9606 GN=VDAC1 PE=1 SV=2	15	VDAC1	5.72142e+08	5.54542e+08	2.65416e+08	6.12474e+08	4.14367e+08	5.14006e+08	7.93597e+08	4.6516e+08	2.7529e+08	3.76254e+08	2.61902e+08	3.67595e+08	1.97361e+08	2.10207e+08	3.76507e+08	8.07387e+08	2.90945e+08	2.16696e+08	1.0601e+08	5.05039e+07	4.32954e+08	4.69761e+08	3.69306e+08	1.24413e+08	2.27998e+08	5.54209e+08	1.04691e+09	4.95717e+08	8.20806e+08	3.45571e+08	5.75726e+08
TRUE	High	Master Protein	P27708	CAD protein OS=Homo sapiens OX=9606 GN=CAD PE=1 SV=3	30	CAD	6.33936e+07	7.14917e+07	6.03125e+07	6.67666e+07	2.34663e+07	4.87005e+07	1.45238e+07	1.34186e+07	3.90711e+07	3.32029e+07	3.58041e+07	4.8465e+07	4.41485e+07	2.14263e+07	8.95211e+07	7.34024e+07	7.5759e+07	3.06121e+07	1.4401e+07	1.3736e+07	8.78592e+07	6.79451e+07	1.37098e+08	1.34817e+07	2.36683e+07	2.20586e+07	8.80077e+07	4.73092e+07	2.44592e+07	5.05858e+07	3.2559e+08
TRUE	High	Master Protein	Q709C8	Vacuolar protein sorting-associated protein 13C OS=Homo sapiens OX=9606 GN=VPS13C PE=1 SV=1	41	VPS13C	5.60065e+07	6.29191e+07	3.79067e+07	1.18618e+08	3.5922e+07	4.98879e+07	3.86575e+07	5.37173e+07	5.47291e+07	3.392e+07	9.64351e+07	6.33582e+07	2.50622e+07	2.51842e+07	7.78498e+07	6.32101e+07	3.00375e+07	2.63056e+07	2.57945e+07	2.59743e+07	7.38247e+07	5.61444e+07	4.41205e+07	6.59085e+07	3.79003e+07	2.50988e+07	5.43135e+07	2.43483e+07	2.96067e+07	2.56646e+07	4.66521e+07
TRUE	High	Master Protein	P38606	V-type proton ATPase catalytic subunit A OS=Homo sapiens OX=9606 GN=ATP6V1A PE=1 SV=2	26	ATP6V1A	5.53709e+07	9.70698e+07	1.35049e+08	1.28037e+08	8.85108e+07	7.49862e+07	5.31018e+07	8.3365e+07	6.04563e+07	8.75214e+07	1.02166e+08	1.5331e+08	5.07738e+07	7.59489e+07	5.74968e+07	1.79063e+08	3.48157e+07	5.00356e+07	2.62532e+08	1.09594e+07	9.48753e+07	8.72843e+07	7.34269e+07	1.15263e+08	3.89539e+07	1.08485e+08	4.36548e+08	7.76059e+07	8.03712e+07	3.85866e+07	1.40623e+08
TRUE	High	Master Protein	Q9BUJ2	Heterogeneous nuclear ribonucleoprotein U-like protein 1 OS=Homo sapiens OX=9606 GN=HNRNPUL1 PE=1 SV=2	22	HNRNPUL1	1.27136e+08	9.91697e+07	4.36497e+07	1.22984e+08	4.70069e+07	1.16021e+08	6.97525e+07	5.21225e+07	7.73781e+07	8.95238e+07	8.29081e+07	6.76358e+07	7.84642e+07	3.29259e+07	1.20449e+08	9.52487e+07	5.97519e+07	4.12618e+07	2.16447e+07	1.50555e+07	4.29927e+08	6.30838e+07	1.79468e+07	1.53499e+08	3.53965e+07	7.15961e+07	3.30883e+07	6.94006e+07	8.97315e+07	7.00384e+07	7.09445e+07
TRUE	High	Master Protein	Q3SY69	Mitochondrial 10-formyltetrahydrofolate dehydrogenase OS=Homo sapiens OX=9606 GN=ALDH1L2 PE=1 SV=2	21	ALDH1L2	1.0241e+08	7.43913e+07	2.40889e+08	6.50641e+07	5.2342e+07	1.26563e+08	3.37263e+07	2.71783e+07	5.17196e+07	9.81236e+07	5.8133e+07	6.0613e+07	9.81635e+07	1.32389e+08	9.58563e+07	5.79564e+07	8.29027e+07	5.50968e+07	5.88998e+07	1.7665e+07	1.0063e+08	8.7876e+07	1.63213e+08	4.62963e+07	2.48145e+07	9.11294e+07	6.67503e+07	1.10818e+08	7.95121e+07	9.902e+07	8.78624e+07
TRUE	High	Master Protein	J3KN67	Tropomyosin alpha-3 chain OS=Homo sapiens OX=9606 GN=TPM3 PE=1 SV=1	1	TPM3	1.05675e+08	8.00721e+07	6.54476e+06	1.0215e+08	7.72415e+07	4.05384e+07	6.63581e+07	3.36173e+07	9.41308e+07	1.59202e+08	8.00386e+07	1.59335e+08	8.57477e+07	8.62681e+07	4.79092e+07	1.347e+08	8.64396e+07	3.65937e+07	3.6829e+07	1.0388e+07	8.60384e+07	8.851e+07	6.31609e+07	5.4372e+07	2.15826e+07	6.50559e+07	1.06035e+07	4.86596e+07	4.58076e+07	7.7777e+07	4.71095e+07
TRUE	High	Master Protein	P54136	Arginine--tRNA ligase, cytoplasmic OS=Homo sapiens OX=9606 GN=RARS PE=1 SV=2	27	RARS	9.27887e+07	1.01182e+08	4.89729e+07	1.7546e+08	7.01181e+07	1.18542e+08	9.43389e+07	7.52465e+07	8.55174e+07	1.57135e+08	1.19008e+08	7.90874e+07	5.9731e+07	5.34776e+07	1.02522e+08	1.60515e+08	9.31217e+07	6.20215e+07	3.12135e+07	1.63841e+07	1.62609e+08	1.06944e+08	1.23637e+08	8.24264e+07	6.86296e+07	8.16058e+07	8.51425e+07	8.32761e+07	1.07843e+08	8.55296e+07	1.38654e+08
TRUE	High	Master Protein	P50991	T-complex protein 1 subunit delta OS=Homo sapiens OX=9606 GN=CCT4 PE=1 SV=4	22	CCT4	1.36242e+08	1.64399e+08	1.05658e+08	1.43211e+08	1.09024e+08	1.12723e+08	1.0116e+08	1.42252e+08	1.08746e+08	1.158e+08	1.24861e+08	1.15786e+08	1.09301e+08	8.09291e+07	1.60753e+08	2.4555e+08	2.04604e+08	8.21028e+07	5.87695e+07	5.98189e+07	2.55303e+08	2.86432e+08	2.97136e+08	1.31752e+08	7.53514e+07	1.59876e+08	2.10847e+08	1.34413e+08	2.01311e+08	1.13228e+08	2.92118e+08
TRUE	High	Master Protein	Q9UDY2	Tight junction protein ZO-2 OS=Homo sapiens OX=9606 GN=TJP2 PE=1 SV=2	24	TJP2	2.18268e+08	1.34436e+08	3.38382e+07	1.24789e+08	3.94652e+07	5.262e+07	4.00132e+07	4.00613e+07	8.1836e+07	5.54283e+07	6.06368e+07	3.79053e+07	2.597e+07	1.24514e+07	4.68653e+07	4.57435e+07	1.86153e+07	1.79575e+07	7.49062e+06	3.07058e+06	3.39902e+07	4.63643e+07	3.60699e+07	2.61008e+07	3.12859e+07	5.87498e+07	7.24411e+07	3.29463e+07	1.14368e+08	5.14324e+07	4.91896e+07
TRUE	High	Master Protein	Q7L576	Cytoplasmic FMR1-interacting protein 1 OS=Homo sapiens OX=9606 GN=CYFIP1 PE=1 SV=1	6	CYFIP1	9.26773e+07	1.12287e+08	9.40254e+07	2.04143e+08	8.90202e+07	1.07517e+08	5.17208e+07	5.8617e+07	9.34222e+07	1.59656e+08	1.1442e+08	8.73919e+07	5.0968e+07	4.62296e+07	1.33237e+08	2.94173e+08	5.60778e+07	7.57392e+07	5.52577e+07	2.48056e+07	2.05183e+09	1.43765e+08	1.1568e+08	5.67235e+07	2.17877e+07	6.94951e+07	8.93587e+07	5.05268e+07	5.90885e+07	3.63075e+07	1.03546e+08
TRUE	High	Master Protein	Q9NYL9	Tropomodulin-3 OS=Homo sapiens OX=9606 GN=TMOD3 PE=1 SV=1	18	TMOD3	2.42439e+08	2.73224e+08	1.78184e+08	1.48037e+08	1.52709e+08	1.05752e+08	6.68908e+07	1.3051e+08	1.97285e+08	1.96152e+08	2.9411e+08	1.4641e+08	1.00396e+08	7.5907e+07	2.63077e+08	7.46537e+07	1.79273e+08	7.72443e+07	2.12102e+08	1.53864e+08	1.65595e+08	1.90935e+08	1.18858e+08	8.84809e+06	2.48895e+07	4.15173e+07	1.68016e+07	2.81341e+07	3.10495e+07	2.28281e+07	4.48356e+07
TRUE	High	Master Protein	P40926	Malate dehydrogenase, mitochondrial OS=Homo sapiens OX=9606 GN=MDH2 PE=1 SV=3	17	MDH2	1.07203e+09	7.93032e+08	4.84525e+08	1.31454e+09	5.59974e+08	6.57741e+08	4.47729e+08	4.53274e+08	4.17857e+08	5.23689e+08	4.87476e+08	6.46375e+08	5.35198e+08	2.55577e+08	7.99198e+08	1.34901e+09	5.37353e+08	3.47881e+08	2.36935e+08	1.03944e+08	8.75349e+08	8.94817e+08	3.11775e+08	7.75694e+07	2.27677e+08	6.89122e+08	1.10683e+09	5.00138e+08	9.71233e+08	4.75139e+08	7.06391e+08
TRUE	High	Master Protein	H7BYY1	Tropomyosin 1 (Alpha), isoform CRA_m OS=Homo sapiens OX=9606 GN=TPM1 PE=1 SV=1	1	TPM1	1.29009e+06	996065	194959	536942	148330	587176	74631.2	232662	11972.6	480395	18873.4	95663.5	2.58858e+06	590047	135198	38860.7	546333	207822	66710.4	361848	2.14552e+06	528052	439994	49593.6	155717	175418	193430	125793	1.23812e+06	1.81778e+06	124936
TRUE	High	Master Protein	Q15019	Septin-2 OS=Homo sapiens OX=9606 GN=SEPT2 PE=1 SV=1	14	SEPT2	4.62871e+08	3.76586e+08	2.04523e+08	4.19438e+08	2.47572e+08	4.59322e+08	2.75213e+08	1.72001e+08	3.13504e+08	3.52477e+08	2.57591e+08	8.93229e+07	3.2211e+08	1.59827e+08	2.1204e+08	2.56663e+08	1.72557e+08	1.45944e+08	8.24614e+07	6.06872e+07	2.37885e+08	2.59841e+08	3.74249e+08	5.24971e+07	6.21402e+07	1.51776e+08	9.49615e+07	9.98678e+07	2.36169e+08	1.99998e+08	2.34789e+08
TRUE	High	Master Protein	P24752	Acetyl-CoA acetyltransferase, mitochondrial OS=Homo sapiens OX=9606 GN=ACAT1 PE=1 SV=1	19	ACAT1	3.86063e+08	3.0347e+08	3.59242e+08	5.54647e+08	1.83943e+08	1.89241e+08	1.63731e+08	1.27827e+08	2.1584e+08	2.78834e+08	1.65234e+08	1.314e+08	1.43669e+08	1.0542e+08	1.9384e+08	1.43577e+08	2.69062e+08	1.22753e+08	4.18307e+07	3.60424e+07	4.40998e+08	3.72072e+08	1.36291e+08	6.77397e+08	2.3411e+08	3.80894e+08	2.34254e+08	3.64732e+08	4.02112e+08	2.05285e+08	1.81976e+08
TRUE	High	Master Protein	P58107	Epiplakin OS=Homo sapiens OX=9606 GN=EPPK1 PE=1 SV=3	9		9.1642e+06	3.50354e+07	1.55758e+06	7.76187e+06	1.17268e+07	5.57565e+06	949769	2.04815e+07	2.56543e+06	9.76552e+06	2.24667e+07	2.50958e+06	4.69409e+06	1.78257e+06	5.61784e+06	2.05012e+07	1.47382e+07	2.85969e+06	897353	6.90587e+06	1.32314e+07	1.22227e+07	3.85142e+06	545725	987997	821905	1.0212e+07	893866	1.03121e+06	606521	851905
TRUE	High	Master Protein	P05783	Keratin, type I cytoskeletal 18 OS=Homo sapiens OX=9606 GN=KRT18 PE=1 SV=2	20	KRT18	2.74269e+07	3.22158e+07	3.77932e+07	6.26327e+07	5.60214e+07	5.13948e+08	5.5741e+07	1.47986e+08	3.06289e+07	3.91295e+07	5.21223e+07	2.30884e+08	2.97818e+07	1.30204e+07	1.24934e+08	2.38891e+07	7.04637e+07	2.3752e+07	6.87272e+06	6.27621e+06	3.64692e+07	5.24371e+07	1.23607e+08	3.14106e+07	1.26057e+08	4.84032e+07	4.62783e+07	3.80278e+07	3.46226e+07	7.66478e+07	1.46872e+08
TRUE	High	Master Protein	Q08431	Lactadherin OS=Homo sapiens OX=9606 GN=MFGE8 PE=1 SV=2	18	MFGE8	1.75247e+08	6.57245e+07	4.75687e+07	1.05643e+08	6.90428e+07	5.34368e+07	5.21329e+07	4.69875e+07	5.26518e+07	7.25541e+07	1.80014e+07	2.73416e+07	1.24341e+08	1.93493e+08	2.8202e+07	3.68231e+07	1.07658e+08	1.24542e+08	1.07623e+08	3.16327e+07	3.26641e+07	1.9408e+08	8.01462e+07	8.08276e+07	3.98582e+07	4.85518e+07	2.87078e+08	6.92696e+08	4.53484e+07	2.48555e+07	1.34584e+08
TRUE	High	Master Protein	Q01105	Protein SET OS=Homo sapiens OX=9606 GN=SET PE=1 SV=3	6	SET	1.5331e+08	4.56756e+08	1.64519e+08	4.49634e+08	1.61854e+08	2.19115e+08	1.02731e+08	1.2698e+08	1.91409e+08	5.27752e+08	9.9532e+07	8.90577e+07	4.12352e+07	3.62528e+07	1.41487e+08	1.10018e+08	1.51288e+08	4.12494e+07	1.96156e+08	2.79171e+07	4.01534e+08	4.04296e+08	9.6187e+07	5.63021e+07	2.73797e+07	6.52272e+07	3.09589e+07	3.45669e+07	2.0181e+08	8.93946e+07	2.43549e+08
TRUE	High	Master Protein	P00739	Haptoglobin-related protein OS=Homo sapiens OX=9606 GN=HPR PE=2 SV=2	5	HPR	1.05258e+06	1.54967e+06	505280	4.0647e+06	2.13586e+06	2.8541e+06	2.61334e+06	1.19609e+06	1.44566e+06	2.07473e+06	4.71944e+06	3.73402e+06	3.57597e+06	1.74114e+06	782897	1.60609e+06	874640	2.71002e+07	2.98592e+06	1.88992e+07	5.83636e+06	2.344e+06	3.85972e+07	552318	781962	1.8969e+06	995789	1.46537e+06	472942	4.05345e+06	4.51575e+06
TRUE	High	Master Protein	Q92900	Regulator of nonsense transcripts 1 OS=Homo sapiens OX=9606 GN=UPF1 PE=1 SV=2	25	UPF1	8.82099e+07	1.0773e+08	4.75367e+07	8.47539e+07	7.05719e+07	8.63015e+07	5.97017e+07	5.24694e+07	4.52015e+07	7.55209e+07	6.21293e+07	4.50656e+07	3.62017e+07	2.27926e+07	5.12117e+07	6.56987e+07	1.39587e+08	2.04397e+07	8.97321e+07	7.38995e+06	5.65781e+07	7.37053e+07	3.85954e+07	2.9001e+07	4.33985e+07	1.26498e+08	1.33176e+08	1.10649e+08	1.41893e+08	8.00169e+07	4.71047e+07
TRUE	High	Master Protein	P08123	Collagen alpha-2(I) chain OS=Homo sapiens OX=9606 GN=COL1A2 PE=1 SV=7	22	COL1A2	1.93107e+09	8.37121e+08	7.87476e+09	4.11388e+08	7.87261e+08	3.87346e+08	8.62046e+08	4.82208e+08	6.29919e+08	2.59208e+09	1.47981e+09	1.56754e+09	3.35315e+09	1.11932e+09	1.02149e+09	3.7428e+08	6.97673e+08	1.65666e+09	1.99969e+09	4.92753e+09	2.44185e+09	1.03618e+09	2.56797e+09	4.36919e+09	1.692e+09	1.7846e+09	1.52207e+09	1.87181e+09	4.60156e+08	1.07611e+09	4.40569e+08
TRUE	High	Master Protein	Q9P2R3	Rabankyrin-5 OS=Homo sapiens OX=9606 GN=ANKFY1 PE=1 SV=2	19	ANKFY1	8.79273e+07	7.39821e+07	3.28053e+07	6.57258e+07	4.63814e+07	4.07114e+07	2.75236e+07	3.18894e+07	3.88004e+07	4.29728e+07	5.04807e+07	4.17177e+07	2.41394e+07	1.1582e+07	4.04606e+07	5.5501e+07	5.19936e+07	3.62123e+07	1.66124e+07	5.58587e+06	1.00304e+08	8.69468e+07	8.35902e+08	3.79335e+08	2.57255e+07	3.62833e+07	3.78002e+07	5.92056e+07	6.14488e+07	2.53409e+07	3.01107e+07
TRUE	High	Master Protein	P51858	Hepatoma-derived growth factor OS=Homo sapiens OX=9606 GN=HDGF PE=1 SV=1	14	HDGF	6.37503e+08	2.85882e+08	5.98505e+07	2.53207e+08	2.14889e+08	1.38348e+08	5.48292e+07	7.28628e+07	1.69563e+08	2.13188e+08	5.17947e+07	1.0319e+08	1.0293e+08	7.34098e+07	1.07364e+08	1.88406e+08	1.98787e+08	6.15891e+07	7.51513e+07	1.5473e+08	3.38789e+08	1.8464e+08	7.95355e+07	4.64525e+08	1.78348e+07	3.2439e+07	2.30165e+07	2.28302e+07	8.00239e+07	6.59537e+07	1.14849e+08
TRUE	High	Master Protein	Q9Y6R1	Electrogenic sodium bicarbonate cotransporter 1 OS=Homo sapiens OX=9606 GN=SLC4A4 PE=1 SV=1	21	SLC4A4	4.90427e+07	1.86896e+08	4.37825e+07	1.76e+08	1.35993e+08	5.70927e+07	7.27678e+07	1.15189e+08	4.63539e+07	7.29432e+07	1.34109e+08	1.48183e+07	3.50959e+07	4.16756e+06	1.4218e+08	4.54673e+07	4.08189e+07	2.87278e+07	3.29053e+06	3.44505e+06	3.94871e+07	9.21447e+07	7.30926e+07	2.53737e+07	2.9114e+07	3.59096e+07	9.28465e+07	5.29456e+07	3.57725e+08	4.17018e+07	1.96463e+08
TRUE	High	Master Protein	P62195	26S proteasome regulatory subunit 8 OS=Homo sapiens OX=9606 GN=PSMC5 PE=1 SV=1	21	PSMC5	1.00849e+08	9.91383e+07	5.57366e+07	1.043e+08	6.96175e+07	6.87626e+07	4.16968e+07	4.68354e+07	5.16039e+07	9.81168e+07	4.59436e+07	4.86864e+07	6.44457e+07	3.03012e+07	1.10543e+08	1.19534e+08	1.2286e+08	4.39011e+07	5.16706e+07	1.92623e+07	8.87277e+07	8.65509e+07	6.64524e+07	1.3885e+07	2.12381e+07	4.51747e+07	3.12951e+07	3.50238e+07	8.96373e+07	6.31534e+07	1.18407e+08
TRUE	High	Master Protein	Q99460	26S proteasome non-ATPase regulatory subunit 1 OS=Homo sapiens OX=9606 GN=PSMD1 PE=1 SV=2	26	PSMD1	6.53061e+07	1.11433e+08	6.37744e+07	8.94424e+07	2.86655e+07	5.62264e+07	1.61839e+07	3.41519e+07	3.04747e+07	2.76219e+07	5.07317e+07	6.23318e+07	2.57332e+07	2.03003e+07	4.95864e+07	4.98658e+07	4.62869e+07	3.21779e+07	1.38475e+07	1.28993e+07	6.06979e+07	2.94009e+07	7.36517e+07	3.81688e+07	9.89183e+06	3.37321e+07	2.13336e+07	3.65926e+07	6.21232e+07	2.7567e+07	3.34056e+07
TRUE	High	Master Protein	P48163	NADP-dependent malic enzyme OS=Homo sapiens OX=9606 GN=ME1 PE=1 SV=1	18	ME1	5.57191e+06	7.55049e+07	6.70149e+07	5.01333e+07	2.58396e+07	4.09781e+07	6.19043e+07	5.45564e+07	1.16391e+08	1.7488e+07	1.52086e+08	1.29239e+07	7.92463e+06	2.31954e+08	6.99335e+06	4.13778e+07	6.86624e+07	6.86964e+06	4.12697e+06	1.22657e+08	3.48723e+07	4.79369e+07	1.40494e+08	2.60748e+07	7.08615e+06	4.52301e+07	2.02666e+08	2.14518e+08	6.59643e+07	1.69374e+08	4.48228e+07
TRUE	High	Master Protein	Q9BZF9	Uveal autoantigen with coiled-coil domains and ankyrin repeats OS=Homo sapiens OX=9606 GN=UACA PE=1 SV=2	25	UACA	2.60475e+07	1.01317e+08	1.81367e+07	3.74649e+07	4.7073e+07	2.41917e+07	3.75375e+07	4.22498e+07	5.06461e+07	2.34326e+07	6.60006e+07	2.91908e+07	5.16081e+07	6.41764e+06	4.2413e+07	1.63026e+08	3.96977e+07	4.65482e+07	1.11628e+07	5.89125e+06	6.62053e+07	7.87703e+07	9.67295e+07	1.59521e+07	2.51227e+07	4.49156e+07	1.15259e+07	4.54771e+07	7.03438e+07	2.2334e+07	4.21282e+07
TRUE	High	Master Protein	P00918	Carbonic anhydrase 2 OS=Homo sapiens OX=9606 GN=CA2 PE=1 SV=2	15	CA2	2.87574e+07	5.84024e+07	1.91407e+08	1.11597e+08	2.4533e+08	1.04415e+08	1.44545e+08	1.89488e+08	5.33568e+07	7.68577e+07	4.38624e+08	2.5521e+08	6.95118e+07	1.86403e+08	1.51275e+08	1.64938e+08	2.92017e+08	1.69766e+08	2.80576e+08	9.94046e+08	1.76446e+08	1.65619e+08	1.55594e+08	3.20787e+07	7.72868e+08	3.71619e+08	5.19875e+08	4.61995e+08	3.53192e+08	2.89372e+08	1.14264e+08
TRUE	High	Master Protein	Q9UM54	Unconventional myosin-VI OS=Homo sapiens OX=9606 GN=MYO6 PE=1 SV=4	2	MYO6	1.95254e+07	9.00028e+07	5.89799e+07	6.05818e+07	3.28962e+07	2.86762e+07	1.41888e+08	1.11604e+08	8.59568e+07	4.60338e+07	4.24097e+07	4.03454e+07	5.99812e+07	2.07337e+08	2.87431e+07	2.96594e+07	6.18687e+07	2.93537e+07	4.25025e+07	5.07871e+07	3.67769e+07	4.76802e+07	1.34674e+07	4.22194e+07	2.08835e+07	3.97392e+07	9.39093e+07	4.08763e+07	3.09217e+07	3.61115e+07	4.35871e+07
TRUE	High	Master Protein	Q15029	116 kDa U5 small nuclear ribonucleoprotein component OS=Homo sapiens OX=9606 GN=EFTUD2 PE=1 SV=1	27	EFTUD2	1.01611e+08	1.05558e+08	3.98012e+07	1.20165e+08	7.5849e+07	8.30992e+07	6.59286e+07	2.97511e+08	9.74142e+07	1.30384e+08	5.85691e+07	3.49066e+07	5.512e+07	2.94659e+07	7.43555e+07	8.7774e+07	4.85761e+07	3.45935e+07	3.79518e+07	3.03426e+07	1.19855e+08	9.40111e+07	7.32921e+07	9.63001e+07	7.22949e+07	1.04653e+08	9.4356e+07	5.65508e+07	1.31186e+08	6.50905e+07	1.05878e+08
TRUE	High	Master Protein	P23526	Adenosylhomocysteinase OS=Homo sapiens OX=9606 GN=AHCY PE=1 SV=4	17	AHCY	2.08742e+08	2.70156e+08	1.72991e+08	2.81023e+08	1.96252e+08	2.37325e+08	1.23463e+08	1.09796e+08	2.27212e+08	2.08307e+08	1.33247e+08	1.78233e+08	1.68842e+08	1.05809e+08	4.6715e+08	2.73257e+08	2.71953e+08	8.63501e+07	6.09498e+07	5.77993e+07	2.79915e+09	2.95997e+08	1.79287e+08	6.48926e+07	5.96571e+07	1.41356e+08	3.20491e+08	2.30806e+08	5.39719e+08	2.04047e+08	2.83455e+08
TRUE	High	Master Protein	Q14194	Dihydropyrimidinase-related protein 1 OS=Homo sapiens OX=9606 GN=CRMP1 PE=1 SV=1	18	CRMP1	1.74891e+08	1.33277e+07	1.29812e+07	3.85384e+06	1.42442e+08	2.45869e+07	1.31701e+07	1.35037e+07	4.15961e+07	2.14586e+07	1.4814e+07	6.58595e+07	3.16736e+07	1.59251e+07	2.74719e+07	5.63991e+07	1.77901e+07	1.40856e+07	1.37476e+07	6.46113e+06	2.77258e+07	5.24241e+06	4.31604e+07	3.35358e+08	1.66496e+07	1.1956e+08	1.72304e+08	5.68612e+07	7.40919e+07	3.93617e+07	4.1018e+07
TRUE	High	Master Protein	Q96HC4	PDZ and LIM domain protein 5 OS=Homo sapiens OX=9606 GN=PDLIM5 PE=1 SV=5	19	PDLIM5	1.67482e+08	9.65684e+07	4.12092e+07	2.44804e+08	7.67937e+07	1.90185e+08	8.98426e+07	8.38109e+07	1.9459e+08	1.36598e+08	8.27518e+07	8.77328e+07	2.58611e+08	9.33139e+07	1.52285e+08	2.16578e+08	4.81418e+07	2.58657e+08	2.29192e+08	4.73856e+07	1.41114e+08	1.70874e+08	5.68655e+07	4.25105e+07	5.12802e+07	5.97184e+07	1.01072e+08	1.25377e+08	2.34686e+08	1.6893e+08	1.29392e+08
TRUE	High	Master Protein	P51178	1-phosphatidylinositol 4,5-bisphosphate phosphodiesterase delta-1 OS=Homo sapiens OX=9606 GN=PLCD1 PE=1 SV=2	19	PLCD1	1.0947e+08	6.61882e+07	4.78499e+07	7.9016e+07	5.54175e+07	4.66225e+07	4.33119e+07	5.54113e+07	1.20016e+08	7.88531e+07	6.32207e+07	1.08738e+07	3.52296e+07	4.15476e+07	6.03182e+07	1.37974e+08	2.38779e+07	3.14561e+07	5.69837e+07	1.43893e+07	5.04962e+07	1.45193e+08	1.90958e+07	5.68274e+07	8.1517e+07	1.01066e+08	1.29553e+08	5.69304e+07	1.4874e+08	6.76838e+07	7.65464e+07
TRUE	High	Master Protein	Q96NY7	Chloride intracellular channel protein 6 OS=Homo sapiens OX=9606 GN=CLIC6 PE=2 SV=3	11	CLIC6	8.32841e+07	1.21255e+08	8.36377e+07	1.44309e+08	1.59325e+08	7.3793e+07	8.84001e+07	5.58378e+07	1.27437e+08	5.54814e+07	7.36529e+07	2.63482e+07	2.23048e+07	1.77028e+07	6.613e+07	2.27094e+07	4.63837e+07	1.10096e+07	1.2742e+07	1.04366e+07	8.7581e+07	2.35825e+08	1.56538e+07	9.28498e+06	3.94969e+07	6.89986e+06	1.63615e+07	3.05159e+07	8.22679e+07	3.6049e+07	6.99593e+07
TRUE	High	Master Protein	Q93008	Probable ubiquitin carboxyl-terminal hydrolase FAF-X OS=Homo sapiens OX=9606 GN=USP9X PE=1 SV=3	31	USP9X	4.40844e+07	3.65788e+07	2.25519e+07	6.67568e+07	3.37927e+07	7.26215e+07	1.96743e+07	2.4815e+07	3.55571e+07	4.23249e+07	3.23378e+07	5.4721e+07	2.82904e+07	1.31622e+07	5.6657e+07	1.05979e+08	3.23635e+07	3.33168e+07	3.0935e+07	6.40415e+06	1.25663e+08	8.57372e+07	2.45623e+08	1.21702e+08	1.10014e+07	2.61483e+07	2.72887e+07	2.66407e+07	4.77699e+07	2.30384e+07	3.70471e+07
TRUE	High	Master Protein	O14980	Exportin-1 OS=Homo sapiens OX=9606 GN=XPO1 PE=1 SV=1	26	XPO1	8.51009e+07	9.58985e+07	4.58183e+07	1.10259e+08	5.89318e+07	7.38504e+07	5.00107e+07	3.93891e+07	7.41497e+07	7.19024e+07	6.55046e+07	7.67376e+07	4.18624e+07	4.42224e+07	7.25236e+07	1.99986e+08	1.2631e+08	2.62642e+07	2.01789e+07	4.6604e+07	1.8637e+08	1.28487e+08	7.98092e+07	3.11589e+07	7.52615e+06	2.14658e+07	1.71081e+08	1.84429e+07	6.05083e+07	2.98097e+07	5.30785e+07
TRUE	High	Master Protein	P52209	6-phosphogluconate dehydrogenase, decarboxylating OS=Homo sapiens OX=9606 GN=PGD PE=1 SV=3	22	PGD	9.33115e+07	2.69182e+08	2.12345e+08	1.78499e+08	2.32843e+08	1.60529e+08	1.07935e+08	1.23613e+08	2.60732e+08	1.44593e+08	2.22717e+08	4.84134e+08	9.82689e+07	6.50574e+07	1.40867e+08	2.42357e+08	1.52568e+08	1.07309e+08	5.05494e+07	3.33447e+07	1.90237e+08	1.70433e+08	2.17453e+08	2.06274e+07	1.34776e+08	1.89094e+08	3.25853e+08	2.09897e+08	2.03561e+08	1.45008e+08	2.15625e+08
TRUE	High	Master Protein	P47897	Glutamine--tRNA ligase OS=Homo sapiens OX=9606 GN=QARS PE=1 SV=1	23	QARS	8.65735e+07	7.15547e+07	4.17871e+07	1.34288e+08	5.54731e+07	1.01645e+08	3.55448e+07	2.88785e+07	5.66012e+07	9.18226e+07	6.89413e+07	5.5156e+07	3.23558e+07	3.61093e+07	5.15457e+07	3.14332e+08	4.09049e+07	3.88755e+07	2.54982e+07	1.77286e+07	1.12757e+08	5.43756e+07	4.39353e+07	3.01814e+07	2.76781e+07	2.84863e+07	2.00941e+07	2.85459e+07	4.76987e+07	3.29077e+07	4.9465e+07
TRUE	High	Master Protein	P26641	Elongation factor 1-gamma OS=Homo sapiens OX=9606 GN=EEF1G PE=1 SV=3	21	EEF1G	3.65365e+08	3.60328e+08	1.25409e+08	6.57046e+08	2.1536e+08	3.19297e+08	1.43173e+08	1.76898e+08	2.63505e+08	5.76002e+08	2.94202e+08	2.77192e+08	1.69365e+08	1.01062e+08	3.34851e+08	2.67148e+08	1.02129e+08	1.77275e+08	5.35992e+07	5.08827e+07	2.65116e+08	5.16605e+08	2.2761e+08	1.90738e+08	1.00515e+08	1.51915e+08	8.56967e+07	1.95544e+08	4.43695e+08	2.54157e+08	3.9643e+08
TRUE	High	Master Protein	Q14240	Eukaryotic initiation factor 4A-II OS=Homo sapiens OX=9606 GN=EIF4A2 PE=1 SV=2	10	EIF4A2	1.2834e+08	1.41176e+08	6.73393e+07	1.19019e+08	7.30878e+07	1.00322e+08	6.48444e+07	7.70619e+07	1.04105e+08	7.6118e+07	7.33615e+07	5.56184e+07	6.62204e+07	1.88854e+07	9.56306e+07	1.51235e+08	3.06814e+07	2.95404e+07	6.52719e+06	8.50458e+06	9.41896e+07	6.8078e+07	9.39552e+07	3.46638e+06	5.97365e+07	9.26858e+07	1.15725e+08	7.70848e+07	1.60607e+08	7.60214e+07	8.17845e+07
TRUE	High	Master Protein	P49748	Very long-chain specific acyl-CoA dehydrogenase, mitochondrial OS=Homo sapiens OX=9606 GN=ACADVL PE=1 SV=1	24	ACADVL	1.06287e+08	8.19012e+07	8.80305e+07	1.25392e+08	3.72487e+07	1.07913e+08	6.9925e+07	8.189e+07	1.07676e+08	8.53019e+07	1.05248e+08	2.95885e+08	9.50365e+07	4.5102e+07	7.6312e+07	2.99572e+08	6.56624e+07	5.52128e+07	1.43216e+08	2.9254e+07	1.1509e+08	2.21066e+08	1.84076e+08	2.57323e+07	9.44744e+07	1.51806e+08	1.3714e+08	1.2203e+08	1.70401e+08	8.72346e+07	1.41361e+08
TRUE	High	Master Protein	O60271	C-Jun-amino-terminal kinase-interacting protein 4 OS=Homo sapiens OX=9606 GN=SPAG9 PE=1 SV=4	3	SPAG9	6.72877e+07	6.79921e+07	2.41643e+07	8.37546e+07	4.58099e+07	6.0609e+07	3.7643e+07	5.17104e+07	3.90431e+07	8.17675e+07	4.42156e+07	1.12044e+07	2.68526e+07	7.66876e+06	3.35496e+07	2.41031e+07	1.18725e+07	1.09128e+07	7.28455e+06	8.03068e+06	1.08032e+08	6.82297e+07	1.76358e+07	3.29453e+07	8.95821e+06	8.1775e+06	1.67344e+07	1.59029e+07	3.90662e+07	4.5046e+07	5.88289e+07
TRUE	High	Master Protein	P04792	Heat shock protein beta-1 OS=Homo sapiens OX=9606 GN=HSPB1 PE=1 SV=2	19	HSPB1	7.92862e+08	5.66431e+08	4.36916e+08	2.36208e+08	3.81508e+08	6.11396e+08	1.06273e+09	5.20831e+08	9.10273e+08	2.80931e+08	1.64809e+09	3.24647e+08	6.37743e+08	5.57367e+08	5.709e+08	7.17129e+08	2.14651e+08	2.97064e+08	3.93394e+08	2.18161e+08	6.16505e+08	3.78532e+08	2.50204e+08	1.4511e+08	3.13784e+08	6.0598e+08	4.94414e+08	1.58303e+09	5.48207e+08	3.66621e+08	4.34629e+08
TRUE	High	Master Protein	P17677	Neuromodulin OS=Homo sapiens OX=9606 GN=GAP43 PE=1 SV=1	13	GAP43	9.26127e+06	5.61991e+06	1.12193e+07	3.456e+07	1.43893e+08	9.66068e+06	7.07632e+06	1.35517e+07	5.69849e+08	5.41228e+08	7.68922e+06	6.13368e+06	2.28654e+06	3.73629e+06	2.71861e+06	2.80344e+07	5.73164e+06	1.84825e+07	3.6501e+06	5.52069e+06	4.99522e+06	3.19638e+08	1.50844e+06	5.96436e+06	2.08998e+07	2.05463e+07	5.46655e+07	9.4759e+06	2.69547e+07	2.56377e+07	6.76655e+07
TRUE	High	Master Protein	P11215	Integrin alpha-M OS=Homo sapiens OX=9606 GN=ITGAM PE=1 SV=2	25	ITGAM	3.03155e+07	2.23225e+07	1.69433e+07	1.09762e+08	2.76894e+07	3.48683e+07	7.93831e+06	1.49721e+07	3.34232e+07	8.1696e+07	3.94872e+07	1.33658e+08	1.88842e+07	9.00266e+06	1.9883e+07	5.90963e+07	4.67852e+07	3.11244e+07	2.09309e+07	6.04041e+07	8.59156e+07	5.97434e+07	1.7386e+07	7.04224e+06	6.27585e+07	1.08342e+08	2.50997e+07	1.0102e+08	1.45906e+08	1.03326e+08	5.14967e+07
TRUE	High	Master Protein	Q06828	Fibromodulin OS=Homo sapiens OX=9606 GN=FMOD PE=1 SV=2	12	FMOD	1.49127e+09	2.33383e+08	8.46631e+08	2.62832e+08	1.35364e+08	2.76369e+08	1.42264e+08	1.67484e+08	1.80114e+08	1.63726e+08	1.05079e+08	1.25646e+08	1.25768e+09	2.33395e+09	1.19251e+08	5.12791e+07	7.59663e+07	1.25583e+09	8.25781e+08	2.57246e+08	8.87979e+07	5.98838e+07	1.53966e+08	8.95805e+07	1.01871e+09	2.68243e+08	2.82189e+08	5.23285e+08	3.40599e+07	7.26023e+08	1.06014e+08
TRUE	High	Master Protein	Q9P2J5	Leucine--tRNA ligase, cytoplasmic OS=Homo sapiens OX=9606 GN=LARS PE=1 SV=2	28	LARS	8.67609e+07	8.82916e+07	4.78481e+07	9.96226e+07	6.93349e+07	3.90709e+07	4.25246e+07	3.53648e+07	4.38585e+07	7.45419e+07	1.03652e+08	3.32947e+07	6.53777e+07	3.64089e+07	1.14235e+08	1.22301e+08	6.62641e+07	7.22972e+07	3.71851e+07	1.37494e+07	2.76244e+08	9.82616e+07	2.11672e+08	9.06453e+07	2.06205e+07	5.51243e+07	1.78621e+08	5.10506e+07	8.8815e+07	3.60816e+07	4.6472e+07
TRUE	High	Master Protein	P62140	Serine/threonine-protein phosphatase PP1-beta catalytic subunit OS=Homo sapiens OX=9606 GN=PPP1CB PE=1 SV=3	7	PPP1CB	2.33692e+08	2.30055e+08	9.89632e+07	2.61181e+08	1.57478e+08	2.51195e+08	1.00363e+08	9.24955e+07	1.81764e+08	1.53397e+08	1.20855e+08	1.14072e+08	1.6111e+08	9.4944e+07	1.66089e+08	1.4973e+08	1.57445e+08	1.6828e+08	8.98885e+07	2.79284e+07	2.2847e+08	2.0689e+08	4.39209e+07	6.39968e+07	6.18545e+07	1.37763e+08	1.2032e+08	1.4479e+08	4.34396e+08	8.74064e+07	1.8343e+08
TRUE	High	Master Protein	P62805	Histone H4 OS=Homo sapiens OX=9606 GN=HIST1H4A PE=1 SV=2	16	HIST1H4A; HIST1H4F; HIST1H4D; HIST1H4J; HIST1H4H; HIST1H4C; HIST4H4; HIST2H4B; HIST1H4E; HIST1H4I; HIST1H4B; HIST2H4A; HIST1H4K; HIST1H4L	2.65298e+09	2.60046e+09	2.82044e+09	3.97352e+09	2.5436e+09	3.60053e+09	2.47209e+09	1.70939e+09	1.89139e+09	5.96569e+09	1.32354e+09	1.99477e+09	3.06889e+09	1.3055e+09	5.3678e+09	2.08293e+09	1.70656e+09	2.06137e+09	1.06444e+09	5.97538e+08	2.05366e+09	2.04552e+09	5.07303e+08	2.9053e+08	2.60974e+09	5.8516e+09	1.65188e+09	3.78281e+09	4.90985e+09	4.26801e+09	6.41892e+09
TRUE	High	Master Protein	O94979	Protein transport protein Sec31A OS=Homo sapiens OX=9606 GN=SEC31A PE=1 SV=3	26	SEC31A	1.31755e+08	1.28726e+08	8.32271e+07	1.55378e+08	7.6924e+07	1.10641e+08	1.63225e+08	6.81302e+07	1.19045e+08	1.67993e+08	1.18341e+08	1.05087e+08	4.6564e+07	5.80518e+07	8.39242e+07	9.64566e+07	8.4232e+07	2.45251e+07	3.85943e+07	1.07597e+07	1.57918e+08	1.20204e+08	4.04283e+08	5.26765e+07	3.27012e+07	8.1618e+07	6.87758e+07	7.22907e+07	1.39056e+08	1.11785e+08	1.57821e+08
TRUE	High	Master Protein	Q13423	NAD(P) transhydrogenase, mitochondrial OS=Homo sapiens OX=9606 GN=NNT PE=1 SV=3	7	NNT	1.19744e+08	1.5035e+08	1.36951e+08	2.98703e+08	6.48842e+07	2.32585e+08	1.10429e+08	1.41846e+08	8.03548e+07	1.41215e+08	9.99997e+07	1.20983e+08	1.01881e+08	2.62487e+07	1.5588e+08	1.83129e+08	1.21832e+08	7.0736e+07	5.28807e+07	9.86536e+07	3.1565e+08	2.70984e+08	1.18279e+08	3.23238e+07	1.01198e+08	9.01279e+08	2.55288e+08	7.56912e+08	4.95428e+08	4.50294e+08	3.00417e+08
TRUE	High	Master Protein	P01861	Immunoglobulin heavy constant gamma 4 OS=Homo sapiens OX=9606 GN=IGHG4 PE=1 SV=1	8	IGHG4	3.66221e+07	6.22527e+07	1.94975e+08	3.20614e+08	2.34736e+07	3.23522e+07	6.65837e+07	1.88109e+08	1.69736e+07	1.77117e+07	7.6859e+07	8.61094e+07	4.5236e+07	2.53717e+08	2.66897e+07	2.14578e+07	3.64886e+07	2.23098e+08	1.86751e+08	8.9054e+07	4.99521e+07	1.81378e+07	4.14961e+07	3.84567e+06	904013	1.19701e+06	3.53223e+06	4.02734e+06	2.81438e+06	4.21491e+06	1.95631e+06
TRUE	High	Master Protein	P55060	Exportin-2 OS=Homo sapiens OX=9606 GN=CSE1L PE=1 SV=3	27	CSE1L	7.24999e+07	7.44978e+07	6.81423e+07	1.68761e+08	1.10203e+08	1.11098e+08	5.0419e+07	7.42271e+07	7.58361e+07	8.03024e+07	9.73019e+07	9.36034e+07	7.57985e+07	3.33739e+08	8.60125e+07	1.92776e+08	3.24621e+08	3.13282e+07	1.7757e+08	1.16514e+08	2.27626e+08	1.34129e+09	1.33259e+08	8.24118e+07	1.5447e+07	2.40643e+07	5.7102e+07	2.28977e+07	7.11078e+07	1.94037e+07	4.67586e+07
TRUE	High	Master Protein	P04003	C4b-binding protein alpha chain OS=Homo sapiens OX=9606 GN=C4BPA PE=1 SV=2	20	C4BPA	7.65366e+07	4.84995e+07	6.6647e+07	2.51894e+07	5.57481e+07	7.29722e+07	2.78609e+07	6.08014e+07	2.68275e+07	4.69627e+07	2.23904e+08	1.09732e+08	1.14381e+08	1.13144e+08	1.7662e+08	6.14513e+07	9.06243e+07	1.41079e+08	2.40655e+08	1.70558e+08	1.42619e+08	1.00414e+08	6.08907e+07	7.03692e+08	2.74913e+08	3.03859e+08	5.53114e+08	3.19233e+08	8.7832e+07	1.51338e+08	1.15431e+08
TRUE	High	Master Protein	P36578	60S ribosomal protein L4 OS=Homo sapiens OX=9606 GN=RPL4 PE=1 SV=5	18	RPL4	2.59081e+08	2.87846e+08	1.6796e+08	3.2031e+08	1.2448e+08	2.47391e+08	7.48801e+07	1.097e+08	9.67926e+07	2.35844e+08	9.52395e+07	2.96774e+08	3.74607e+08	5.42978e+07	2.3753e+08	3.15627e+08	1.30481e+08	7.6431e+07	3.2799e+07	1.7984e+07	4.10181e+08	2.11152e+08	1.25734e+08	6.01248e+07	7.69498e+07	1.89459e+08	1.23545e+08	1.63617e+08	2.40744e+08	1.20704e+08	2.45012e+08
TRUE	High	Master Protein	Q96CM8	Acyl-CoA synthetase family member 2, mitochondrial OS=Homo sapiens OX=9606 GN=ACSF2 PE=1 SV=2	18	ACSF2	5.37753e+07	5.78912e+07	1.24384e+07	8.25438e+07	1.88554e+07	1.00533e+08	1.18184e+07	2.05382e+07	4.15811e+07	3.71876e+07	2.07577e+07	3.47015e+07	1.65648e+07	1.16923e+07	2.158e+07	3.40897e+07	4.94241e+07	1.57548e+07	9.20033e+06	4.61316e+06	1.17051e+08	5.50298e+07	9.7345e+07	8.72527e+06	8.32247e+06	4.20249e+07	5.89412e+07	5.42938e+07	5.32435e+07	3.80043e+07	5.78836e+07
TRUE	High	Master Protein	P02765	Alpha-2-HS-glycoprotein OS=Homo sapiens OX=9606 GN=AHSG PE=1 SV=1	10	AHSG	2.51953e+07	5.23026e+07	7.63973e+07	4.97931e+07	7.8067e+07	5.30986e+07	8.74118e+07	1.13808e+08	5.59209e+07	5.0821e+07	2.39469e+07	9.17763e+07	1.56243e+08	2.16918e+08	4.84539e+07	3.78893e+07	7.16653e+07	2.48872e+08	1.67963e+08	3.03355e+08	5.82086e+07	8.62839e+07	1.13856e+08	2.18986e+08	5.56507e+07	2.2907e+07	1.12597e+08	1.5733e+07	1.33328e+07	5.98772e+07	5.19472e+07
TRUE	High	Master Protein	P0DOX7	Immunoglobulin kappa light chain OS=Homo sapiens OX=9606 PE=1 SV=1	2		5.36228e+06	1.69648e+07	6.79432e+07	4.48742e+07	2.28911e+07	9.47601e+06	3.71762e+07	4.74583e+07	4.08001e+07	2.75638e+07	8.58381e+07	4.07466e+07	2.91198e+07	7.43787e+07	5.91105e+06	3.16543e+07	1.05009e+07	7.52834e+07	8.64722e+07	4.06712e+07	4.28664e+07	4.38475e+06	3.17554e+06	2.88302e+06	1.37651e+07	2.34892e+06	4.3897e+06	8.7536e+06	2.41125e+06	1.22712e+06	1.76652e+06
TRUE	High	Master Protein	Q9Y265	RuvB-like 1 OS=Homo sapiens OX=9606 GN=RUVBL1 PE=1 SV=1	19	RUVBL1	1.2056e+08	1.02071e+08	5.65457e+07	9.92692e+07	5.48911e+07	5.74935e+07	4.81986e+07	5.15939e+07	5.72077e+07	9.24525e+07	6.61794e+07	4.29935e+07	7.19225e+07	4.37833e+07	7.53149e+07	1.0873e+08	9.16431e+07	4.35458e+07	3.90337e+07	2.87387e+07	1.00491e+08	1.10493e+08	4.80603e+07	1.38775e+07	3.77107e+07	6.26709e+07	3.75191e+07	4.58538e+07	1.408e+08	5.59042e+07	6.95086e+07
TRUE	High	Master Protein	O75746	Calcium-binding mitochondrial carrier protein Aralar1 OS=Homo sapiens OX=9606 GN=SLC25A12 PE=1 SV=2	21	SLC25A12	9.45896e+07	8.68682e+07	2.89678e+07	9.77466e+07	6.5045e+07	6.07584e+07	3.69669e+07	3.28045e+07	5.27675e+07	7.03816e+07	5.51765e+07	3.06545e+07	1.83918e+07	1.89672e+07	4.71096e+07	6.87051e+07	2.71877e+07	1.9208e+07	3.22541e+07	5.48794e+06	9.80961e+07	4.29371e+07	7.2434e+07	2.72576e+07	3.6067e+07	1.32313e+08	2.06287e+08	6.88046e+07	1.01407e+08	5.54059e+07	5.24908e+07
TRUE	High	Master Protein	P35609	Alpha-actinin-2 OS=Homo sapiens OX=9606 GN=ACTN2 PE=1 SV=1	2	ACTN2	159868	38842.5	540372	5.71147e+06	24243.1	202752	4.58226e+06	4.48407e+06	3.93443e+06	2.05584e+07	46891.5	655455	847873	108911	502650	171834	98640.6	1.71836e+06	55708.4	204768	208666	87734.7	17857.8	63242.2	106556	26906.6	2.85903e+06	1.59655e+06	80635	1.93434e+06	71161
TRUE	High	Master Protein	P16144	Integrin beta-4 OS=Homo sapiens OX=9606 GN=ITGB4 PE=1 SV=5	25	ITGB4	6.98067e+07	5.26519e+07	1.83339e+07	3.27372e+07	2.9067e+07	2.22039e+07	4.77026e+07	4.21284e+07	5.21695e+07	1.8424e+07	5.73171e+07	3.44179e+07	4.95827e+07	1.34016e+07	7.32891e+07	2.52013e+07	3.67951e+07	2.57047e+07	2.84539e+07	7.32293e+06	7.04977e+07	4.10347e+07	1.20237e+07	7.88309e+06	2.3309e+08	2.52654e+08	4.43405e+07	1.28153e+08	5.40802e+07	7.55227e+07	3.3322e+07
TRUE	High	Master Protein	P10768	S-formylglutathione hydrolase OS=Homo sapiens OX=9606 GN=ESD PE=1 SV=2	16	ESD	2.08109e+08	2.2545e+08	9.25612e+07	2.15167e+08	1.52428e+08	1.24357e+08	2.39584e+08	1.66582e+08	1.74507e+08	1.7839e+08	1.45828e+08	5.48456e+07	1.29628e+08	6.71662e+07	1.12739e+08	1.16662e+08	7.73064e+07	7.912e+07	2.29711e+07	7.20291e+07	1.6013e+08	2.90806e+08	1.20272e+08	5.32729e+07	2.67003e+07	3.1872e+07	8.2188e+07	6.05504e+07	6.48768e+07	4.43973e+07	6.44834e+07
TRUE	High	Master Protein	O43399	Tumor protein D54 OS=Homo sapiens OX=9606 GN=TPD52L2 PE=1 SV=2	12	TPD52L2	1.60504e+08	1.8029e+08	4.63372e+07	1.76984e+08	1.26466e+08	2.14848e+08	1.20487e+08	8.90594e+07	1.11243e+08	1.60006e+08	1.08847e+08	4.34171e+07	7.16461e+07	3.89195e+07	1.65126e+08	1.14737e+08	3.7945e+07	4.83204e+07	3.24831e+07	1.80136e+07	1.7658e+08	2.38969e+08	6.20752e+07	2.81469e+07	1.25311e+07	3.0486e+07	2.66912e+07	4.5087e+07	1.66651e+08	1.09027e+08	1.32752e+08
TRUE	High	Master Protein	P17844	Probable ATP-dependent RNA helicase DDX5 OS=Homo sapiens OX=9606 GN=DDX5 PE=1 SV=1	18	DDX5	1.26872e+08	7.41657e+07	7.33054e+07	1.55644e+08	4.95962e+07	1.23252e+08	6.50562e+07	7.68112e+07	6.94515e+07	1.23673e+08	8.45162e+07	4.59145e+07	5.25592e+07	3.24555e+07	1.62462e+08	2.09786e+08	9.54235e+07	4.23761e+07	3.75502e+07	1.53193e+07	1.18554e+08	1.00693e+08	1.13636e+08	3.78137e+08	1.37305e+07	3.77973e+07	3.70717e+07	3.75135e+07	7.51701e+07	6.41511e+07	5.68562e+07
TRUE	High	Master Protein	P16112	Aggrecan core protein OS=Homo sapiens OX=9606 GN=ACAN PE=1 SV=3	25		1.42199e+07	1.42695e+07	1.14071e+07	2.70629e+07	5.46605e+06	1.35077e+07	1.69065e+07	1.55179e+07	1.87952e+07	1.56942e+07	2.19092e+07	2.29374e+07	3.44702e+08	4.7458e+08	1.42981e+07	3.42698e+07	1.97382e+07	4.9661e+08	1.21437e+08	1.73155e+07	4.98916e+07	7.73089e+07	3.88506e+07	3.95934e+07	1.59493e+07	5.42315e+07	1.16268e+07	5.69898e+07	2.837e+07	4.53035e+07	4.23968e+07
TRUE	High	Master Protein	Q92945	Far upstream element-binding protein 2 OS=Homo sapiens OX=9606 GN=KHSRP PE=1 SV=4	20	KHSRP	2.19878e+08	2.60653e+08	7.72073e+07	4.32245e+08	2.97063e+08	2.05589e+08	1.08382e+08	9.45465e+07	1.90559e+08	1.5704e+08	1.00522e+08	9.07368e+07	1.53137e+08	1.56426e+08	1.49697e+08	3.49499e+08	1.22765e+08	1.2758e+08	4.827e+07	2.4373e+07	2.0677e+08	2.45e+08	3.35121e+08	7.6719e+07	8.8539e+07	1.89086e+08	1.20446e+08	7.68803e+07	3.71468e+08	2.62039e+08	1.60279e+08
TRUE	High	Master Protein	O00764	Pyridoxal kinase OS=Homo sapiens OX=9606 GN=PDXK PE=1 SV=1	17	PDXK	4.64163e+08	1.65783e+08	1.01106e+08	1.32172e+08	1.07622e+08	9.43005e+07	3.12049e+08	9.09958e+07	2.61101e+08	2.21978e+08	4.54569e+07	4.59631e+07	6.11505e+07	1.40054e+07	7.38799e+07	5.69891e+07	5.15718e+07	3.15969e+07	8.1398e+06	2.22891e+07	1.30332e+08	1.16472e+08	5.76907e+07	9.43433e+06	2.70663e+07	4.44046e+07	6.97782e+07	8.03051e+07	1.63763e+08	7.87042e+07	1.1506e+08
TRUE	High	Master Protein	P04217	Alpha-1B-glycoprotein OS=Homo sapiens OX=9606 GN=A1BG PE=1 SV=4	18	A1BG	6.44095e+07	9.32513e+07	1.13295e+08	9.03542e+07	1.07055e+08	1.33124e+08	1.50472e+08	2.00271e+08	8.51529e+07	1.20816e+08	1.62759e+08	1.41873e+08	9.51522e+07	3.97399e+08	7.75081e+07	7.45843e+07	1.48424e+08	2.1821e+08	1.23794e+08	2.21126e+08	7.00596e+07	1.07237e+08	2.22789e+08	1.24343e+08	1.51676e+08	8.71852e+07	1.57589e+08	1.43192e+08	4.77203e+07	2.32103e+08	9.86703e+07
TRUE	High	Master Protein	P16152	Carbonyl reductase [NADPH] 1 OS=Homo sapiens OX=9606 GN=CBR1 PE=1 SV=3	14	CBR1; SETD4	3.23012e+08	4.29935e+08	2.07384e+08	3.10897e+08	3.81144e+08	2.5626e+08	1.67712e+08	1.55346e+08	2.80203e+08	3.14208e+08	3.08331e+08	1.32419e+08	2.21064e+08	1.41156e+08	3.65615e+08	4.76297e+08	1.54149e+08	2.5886e+08	1.55072e+08	1.90497e+08	3.17824e+08	3.20989e+08	6.42166e+08	3.15209e+08	2.29035e+08	2.43179e+08	4.50248e+08	4.43639e+08	5.26148e+08	3.94632e+08	2.31374e+08
TRUE	High	Master Protein	O00299	Chloride intracellular channel protein 1 OS=Homo sapiens OX=9606 GN=CLIC1 PE=1 SV=4	18	CLIC1	1.71946e+08	2.72763e+08	1.48613e+08	2.85991e+08	3.19161e+08	1.70729e+08	3.04086e+08	1.93528e+08	4.04361e+08	4.51885e+08	2.56275e+08	9.49859e+07	6.0613e+07	7.47168e+07	1.4854e+08	9.08619e+07	1.26748e+08	8.14961e+07	5.54669e+07	3.46386e+07	2.08767e+08	1.80507e+08	1.23307e+08	6.68639e+07	2.46477e+07	2.31371e+07	5.94583e+07	8.82509e+07	2.00572e+08	1.44918e+08	2.83691e+08
TRUE	High	Master Protein	P31146	Coronin-1A OS=Homo sapiens OX=9606 GN=CORO1A PE=1 SV=4	20	CORO1A	1.94517e+08	1.22304e+08	1.2193e+08	4.70667e+08	2.00683e+08	2.45455e+08	5.05024e+07	5.02893e+07	1.63216e+08	3.9218e+08	4.64502e+07	2.96553e+08	7.54177e+07	1.15761e+08	8.15149e+07	1.18032e+08	2.23788e+08	8.69633e+07	3.4988e+07	1.80652e+07	1.42233e+08	2.55228e+08	7.24073e+07	7.39684e+07	6.03519e+07	1.38194e+08	1.06237e+08	1.03294e+08	9.90158e+07	1.15307e+08	4.56179e+08
TRUE	High	Master Protein	P51648	Fatty aldehyde dehydrogenase OS=Homo sapiens OX=9606 GN=ALDH3A2 PE=1 SV=1	19	ALDH3A2	5.0145e+07	1.58308e+08	1.03707e+08	3.21313e+08	2.00734e+08	3.27825e+08	5.07737e+07	1.58206e+08	9.28094e+07	1.38544e+08	3.1419e+08	4.50952e+07	6.43582e+07	2.5746e+07	4.73063e+07	1.27857e+08	1.15136e+08	6.80688e+07	2.31314e+07	1.25652e+07	1.2295e+08	1.27315e+08	1.35281e+08	2.34576e+07	8.71336e+07	1.17219e+08	1.55776e+08	1.38229e+08	5.05738e+08	1.24491e+08	1.92173e+08
TRUE	High	Master Protein	P09619	Platelet-derived growth factor receptor beta OS=Homo sapiens OX=9606 GN=PDGFRB PE=1 SV=1	19	PDGFRB	1.14155e+08	5.32291e+07	3.95868e+07	7.2808e+07	2.58326e+07	1.01821e+08	2.94901e+07	4.90049e+07	6.41955e+07	7.37124e+07	4.49179e+07	1.82323e+07	2.21836e+07	1.02323e+07	2.27255e+07	3.48033e+07	1.97285e+07	1.84326e+07	5.61441e+06	3.08855e+06	3.67486e+07	9.46182e+07	3.63678e+08	2.79848e+07	4.32539e+07	9.83507e+07	1.01028e+08	8.57849e+07	1.36358e+08	8.01717e+07	1.16845e+08
TRUE	High	Master Protein	Q96AC1	Fermitin family homolog 2 OS=Homo sapiens OX=9606 GN=FERMT2 PE=1 SV=1	23	FERMT2	6.36917e+07	1.03982e+08	4.41054e+07	1.42268e+08	7.39124e+07	9.87238e+07	5.32204e+07	1.14614e+08	1.28446e+08	1.42275e+08	7.2216e+07	2.68447e+07	8.68954e+07	4.15609e+07	4.1678e+07	3.36297e+07	5.50304e+07	5.73487e+07	3.83759e+07	9.03682e+06	4.59138e+07	9.74764e+07	4.76639e+07	1.16482e+07	2.2661e+07	9.55047e+07	1.35783e+08	7.74942e+07	1.32801e+08	1.23554e+08	2.72811e+08
TRUE	High	Master Protein	P55809	Succinyl-CoA:3-ketoacid coenzyme A transferase 1, mitochondrial OS=Homo sapiens OX=9606 GN=OXCT1 PE=1 SV=1	19	OXCT1	6.4473e+07	1.22507e+08	2.32757e+07	7.26863e+07	8.66553e+07	6.36953e+07	2.02617e+08	1.20588e+08	6.13972e+07	2.94721e+07	4.43872e+07	5.34332e+07	5.4045e+07	1.72216e+07	1.16444e+08	3.72117e+07	2.66378e+07	2.68084e+07	2.8152e+06	7.32822e+06	1.94418e+08	5.24324e+07	2.07049e+07	7.32092e+07	3.57121e+07	1.21332e+08	6.42706e+07	7.9773e+07	1.00942e+08	1.25446e+08	2.51028e+07
TRUE	High	Master Protein	P06748	Nucleophosmin OS=Homo sapiens OX=9606 GN=NPM1 PE=1 SV=2	11	NPM1	5.11778e+08	2.29901e+08	7.73716e+07	6.18205e+08	1.98981e+08	5.79627e+08	2.12943e+08	2.19763e+08	2.47263e+08	4.04665e+08	1.16433e+08	2.0132e+08	8.10834e+07	6.23035e+07	1.28945e+08	2.10665e+08	1.63485e+08	6.74864e+07	2.13228e+07	3.98555e+07	4.77608e+08	3.50896e+08	4.20259e+08	2.54391e+07	5.63403e+07	7.11006e+07	2.10737e+07	1.24681e+08	1.94774e+08	1.71295e+08	2.55957e+08
TRUE	High	Master Protein	P07196	Neurofilament light polypeptide OS=Homo sapiens OX=9606 GN=NEFL PE=1 SV=3	23	NEFL	8.71873e+07	2.64763e+07	1.00118e+08	3.0624e+07	2.29819e+08	7.13752e+07	3.69461e+07	2.65748e+07	1.35243e+07	2.72138e+07	3.04374e+07	6.2794e+07	2.52026e+07	1.48723e+07	7.00539e+07	2.59026e+08	1.33829e+07	1.46502e+08	1.52407e+07	3.84929e+06	4.92942e+07	6.45649e+07	2.01501e+08	1.95007e+08	7.31829e+07	7.10121e+07	7.57858e+08	8.9179e+07	1.22687e+08	1.27603e+08	1.14049e+08
TRUE	High	Master Protein	O95865	N(G),N(G)-dimethylarginine dimethylaminohydrolase 2 OS=Homo sapiens OX=9606 GN=DDAH2 PE=1 SV=1	13	DDAH2	2.28353e+08	2.47585e+08	1.91364e+08	1.07976e+08	1.17755e+08	1.97802e+08	1.84545e+08	1.29742e+08	2.20211e+08	3.12114e+08	1.71194e+08	6.6266e+07	1.96061e+08	6.23551e+07	1.54859e+08	9.19151e+07	1.41236e+08	7.94545e+07	4.16753e+07	3.36136e+07	2.79244e+08	1.77222e+08	2.52214e+08	4.98984e+07	2.143e+08	9.21999e+07	7.98273e+07	1.28524e+08	1.35635e+08	1.54285e+08	1.97766e+08
TRUE	High	Master Protein	P21281	V-type proton ATPase subunit B, brain isoform OS=Homo sapiens OX=9606 GN=ATP6V1B2 PE=1 SV=3	18	ATP6V1B2	4.29599e+07	6.70924e+07	5.10123e+07	8.62758e+07	8.41437e+07	5.52134e+07	4.40172e+07	4.62188e+07	6.53884e+07	9.0573e+07	3.90771e+07	9.77953e+07	8.78353e+08	2.4568e+07	3.72635e+07	9.73607e+07	4.5545e+07	8.24867e+08	2.43421e+07	1.45207e+07	8.48032e+07	7.06162e+07	7.9463e+07	5.85262e+07	2.64914e+08	7.73751e+07	2.09667e+08	6.30857e+07	5.09461e+07	5.14411e+07	5.93196e+07
TRUE	High	Master Protein	P02649	Apolipoprotein E OS=Homo sapiens OX=9606 GN=APOE PE=1 SV=1	18	APOE	1.7174e+08	1.96688e+08	1.22134e+08	3.42478e+08	9.0008e+07	2.73399e+08	6.92897e+07	8.91955e+07	1.06464e+08	3.29702e+08	1.0665e+08	9.77768e+07	2.7928e+08	2.23886e+08	1.2192e+08	6.80539e+07	2.17685e+08	2.06446e+08	2.84263e+08	9.93609e+07	1.87168e+08	1.73601e+08	3.27024e+08	3.7005e+08	2.70206e+08	2.3463e+08	2.97913e+08	1.78524e+08	1.02218e+08	1.86535e+08	4.95049e+08
TRUE	High	Master Protein	P49023	Paxillin OS=Homo sapiens OX=9606 GN=PXN PE=1 SV=3	18	PXN	1.10071e+08	8.9317e+07	3.45285e+07	8.85399e+07	4.03238e+07	6.36396e+07	9.36969e+07	8.50904e+07	5.12003e+07	8.00226e+07	8.49025e+07	1.42663e+07	1.71054e+07	8.83234e+06	5.09721e+07	2.05901e+07	4.59605e+07	9.27779e+06	6.64801e+06	2.17619e+07	5.4812e+07	4.95357e+07	2.61777e+07	3.66471e+07	1.74201e+06	8.80854e+06	9.84906e+06	7.76798e+06	9.25994e+06	2.69622e+07	2.09937e+07
TRUE	High	Master Protein	Q5SSJ5	Heterochromatin protein 1-binding protein 3 OS=Homo sapiens OX=9606 GN=HP1BP3 PE=1 SV=1	25	HP1BP3	1.37647e+08	2.6797e+08	1.35148e+08	1.56954e+08	9.30508e+07	1.80673e+08	1.32976e+08	1.43834e+08	7.05193e+07	2.05568e+08	1.09686e+08	1.21051e+09	3.88047e+07	3.75543e+07	1.75236e+08	1.84209e+08	2.10462e+08	4.90535e+07	2.91967e+07	2.80768e+07	2.14467e+08	2.60614e+08	2.60939e+08	1.07367e+08	2.48212e+08	1.59467e+08	9.65783e+07	2.36734e+08	2.02236e+08	9.97154e+07	2.2286e+08
TRUE	High	Master Protein	Q9UBQ7	Glyoxylate reductase/hydroxypyruvate reductase OS=Homo sapiens OX=9606 GN=GRHPR PE=1 SV=1	17	GRHPR	1.70286e+08	1.78099e+08	1.26106e+08	1.56849e+08	7.19552e+07	4.56095e+07	3.45457e+07	5.17764e+07	8.6836e+07	1.26091e+08	3.58468e+07	6.43055e+07	5.43237e+07	1.91777e+07	8.51925e+07	1.09207e+08	7.38747e+07	4.31594e+07	1.5537e+07	2.17987e+07	1.34463e+08	1.6124e+08	3.97408e+07	4.40176e+07	6.99187e+07	5.70801e+07	8.68337e+07	7.16184e+07	2.1215e+08	8.03533e+07	1.74577e+08
TRUE	High	Master Protein	P35998	26S proteasome regulatory subunit 7 OS=Homo sapiens OX=9606 GN=PSMC2 PE=1 SV=3	20	PSMC2	8.19745e+07	1.14261e+08	6.55564e+07	1.81371e+08	7.05403e+07	8.1965e+07	5.96957e+07	8.76676e+07	9.70669e+07	1.17593e+08	8.64457e+07	9.34573e+07	4.91153e+07	5.14887e+07	7.77548e+07	1.20686e+08	9.3466e+07	2.87529e+07	6.40456e+07	3.84942e+07	9.02023e+07	1.20493e+08	1.18728e+08	1.21544e+08	4.28129e+07	8.63286e+07	6.50129e+07	8.62664e+07	1.18259e+08	1.1221e+08	1.16674e+08
TRUE	High	Master Protein	P00491	Purine nucleoside phosphorylase OS=Homo sapiens OX=9606 GN=PNP PE=1 SV=2	17	PNP	6.63042e+07	2.40163e+07	2.24162e+07	5.28332e+07	3.68564e+07	3.08383e+07	7.56651e+07	3.6571e+07	2.42769e+07	4.99449e+07	7.00267e+07	7.17265e+07	3.61543e+07	1.97828e+07	3.32601e+07	4.49924e+07	6.82371e+07	3.44937e+07	5.79343e+07	3.17626e+08	3.78793e+07	7.60029e+07	1.8082e+08	3.30509e+07	8.13461e+07	2.94295e+07	5.81777e+07	5.63609e+07	4.40895e+07	4.32109e+07	3.57302e+07
TRUE	High	Master Protein	O43143	Pre-mRNA-splicing factor ATP-dependent RNA helicase DHX15 OS=Homo sapiens OX=9606 GN=DHX15 PE=1 SV=2	22	DHX15	1.00202e+08	1.20849e+08	3.7535e+07	1.24483e+08	5.56784e+07	8.65757e+07	4.72893e+07	4.73043e+07	8.10515e+07	8.43235e+07	7.36718e+07	6.79215e+07	6.31673e+07	3.61e+07	5.6553e+07	1.27095e+08	8.60943e+07	4.84495e+07	2.46447e+07	1.44821e+07	1.03108e+08	8.19862e+07	9.60259e+07	2.7228e+08	4.01714e+07	6.86451e+07	2.20497e+08	8.38799e+07	8.54567e+07	5.96533e+07	2.31431e+07
TRUE	High	Master Protein	Q13451	Peptidyl-prolyl cis-trans isomerase FKBP5 OS=Homo sapiens OX=9606 GN=FKBP5 PE=1 SV=2	18	FKBP5	8.46948e+07	3.91464e+07	3.04345e+07	1.04436e+08	7.82947e+07	1.00823e+08	3.38238e+07	4.14449e+07	1.64031e+07	6.63742e+07	6.03002e+07	3.18361e+07	5.14376e+07	3.27681e+07	5.30985e+07	7.11891e+07	6.66845e+07	4.87322e+07	2.61985e+07	1.23881e+07	7.70872e+07	9.63799e+07	3.74672e+07	1.35062e+08	4.25542e+07	3.89733e+07	2.11283e+07	3.21751e+07	4.09775e+07	2.96027e+07	8.83637e+07
TRUE	High	Master Protein	O75116	Rho-associated protein kinase 2 OS=Homo sapiens OX=9606 GN=ROCK2 PE=1 SV=4	24	ROCK2	7.89097e+07	6.80738e+07	4.62004e+07	8.42027e+07	2.39328e+07	6.91754e+07	3.52181e+07	4.07483e+07	4.32597e+07	5.56673e+07	5.01723e+07	9.3058e+07	5.09279e+07	2.00844e+07	4.56151e+07	6.08526e+07	4.42583e+07	2.06049e+07	1.98872e+07	4.33973e+07	1.04809e+08	8.83736e+07	1.14124e+08	8.25276e+07	1.39546e+07	5.19771e+07	3.91511e+07	4.1718e+07	4.35476e+07	3.35171e+07	4.84551e+07
TRUE	High	Master Protein	P67809	Nuclease-sensitive element-binding protein 1 OS=Homo sapiens OX=9606 GN=YBX1 PE=1 SV=3	5	YBX1	1.9343e+08	1.42005e+08	3.4654e+07	2.58687e+08	5.26907e+07	7.34965e+07	2.81674e+07	3.45867e+07	1.64442e+08	1.32417e+08	3.03435e+06	1.86153e+07	3.15303e+07	9.33525e+06	1.52022e+07	2.28873e+07	988766	2.77694e+07	6.74876e+06	4.63674e+06	3.10056e+07	8.0469e+07	196956	551463	594603	1.28848e+07	373558	419696	460621	289856	495826
TRUE	High	Master Protein	P20020	Plasma membrane calcium-transporting ATPase 1 OS=Homo sapiens OX=9606 GN=ATP2B1 PE=1 SV=3	7	ATP2B1	1.56308e+06	5.35731e+06	5.43621e+06	1.71023e+06	4.29666e+06	4.9168e+06	3.6939e+06	5.50164e+06	6.69525e+06	5.78253e+06	6.05716e+06	1.05235e+07	2.67572e+06	7.32641e+06	1.70601e+07	3.45785e+07	455635	4.07932e+06	1.46525e+07	1.60662e+06	4.75862e+06	7.00059e+06	1.79676e+07	2.24715e+07	4.10897e+06	4.89465e+07	5.97788e+07	1.87755e+07	6.36358e+06	4.42678e+06	3.3066e+06
TRUE	High	Master Protein	P62424	60S ribosomal protein L7a OS=Homo sapiens OX=9606 GN=RPL7A PE=1 SV=2	19	RPL7A	1.58565e+08	1.30544e+08	7.74966e+07	1.77773e+08	9.41927e+07	1.81289e+08	1.0345e+08	6.0701e+07	3.96365e+07	2.67037e+08	7.90507e+07	1.19367e+08	7.20998e+07	5.03439e+07	1.20373e+08	8.93678e+07	9.78089e+07	4.61481e+07	1.29434e+08	2.11561e+07	1.14571e+08	1.87587e+08	1.02172e+08	6.57297e+07	4.35164e+07	8.20689e+07	4.14897e+07	7.58444e+07	1.34933e+08	9.51918e+07	1.34376e+08
TRUE	High	Master Protein	P25311	Zinc-alpha-2-glycoprotein OS=Homo sapiens OX=9606 GN=AZGP1 PE=1 SV=2	15	AZGP1	3.26628e+07	2.87689e+07	2.33517e+07	7.14806e+07	5.90212e+07	6.88097e+07	1.48536e+08	1.0683e+08	3.0651e+07	8.58713e+07	9.37205e+07	1.13621e+08	4.54823e+08	2.36582e+08	9.85891e+07	2.53067e+07	4.58864e+07	2.91661e+08	8.03541e+07	1.0225e+08	2.49412e+08	6.1631e+07	1.85799e+08	3.16483e+08	4.15186e+07	1.74114e+07	2.84457e+07	2.6363e+07	9.90295e+06	1.04805e+08	4.31574e+08
TRUE	High	Master Protein	P07858	Cathepsin B OS=Homo sapiens OX=9606 GN=CTSB PE=1 SV=3	12	CTSB	2.28555e+08	1.3299e+08	7.18691e+07	3.76302e+08	1.38305e+08	2.62485e+08	1.14069e+08	1.03221e+08	1.53669e+08	2.03361e+08	1.26158e+08	8.05202e+08	1.20469e+08	1.17102e+08	1.58435e+08	3.36926e+08	8.52119e+07	8.94143e+07	8.33835e+07	2.20448e+07	1.9773e+08	1.81723e+08	1.56422e+08	7.73428e+07	3.80545e+07	4.41162e+07	3.77055e+07	1.75519e+08	9.44657e+07	1.32447e+08	6.88107e+07
TRUE	High	Master Protein	P04179	Superoxide dismutase [Mn], mitochondrial OS=Homo sapiens OX=9606 GN=SOD2 PE=1 SV=3	15		2.80117e+08	4.27212e+08	1.5352e+08	5.03766e+08	6.02946e+08	4.67906e+08	3.9259e+08	2.25183e+08	2.76668e+08	6.75357e+08	3.51427e+08	2.53537e+08	1.42877e+08	4.75764e+08	2.13865e+08	3.33148e+08	1.12674e+08	1.77807e+08	1.91861e+08	3.53139e+07	1.11139e+08	2.06138e+08	1.38914e+08	9.11741e+07	1.60331e+08	1.4385e+08	1.93752e+08	2.15575e+08	4.79119e+08	1.08073e+08	8.2215e+07
TRUE	High	Master Protein	P54886	Delta-1-pyrroline-5-carboxylate synthase OS=Homo sapiens OX=9606 GN=ALDH18A1 PE=1 SV=2	21	ALDH18A1	8.26233e+07	1.12654e+08	4.73987e+07	7.43643e+07	4.26871e+07	8.43433e+07	6.5705e+07	2.92771e+07	4.79814e+07	4.6747e+07	3.51508e+07	7.22932e+07	3.11437e+07	4.04919e+07	2.18055e+07	7.6129e+07	2.43956e+07	1.76541e+07	2.35149e+07	2.11542e+07	2.58141e+07	8.60772e+07	2.15186e+08	8.52132e+07	2.07564e+07	4.59573e+07	2.89653e+07	4.05419e+07	6.97714e+07	7.22942e+07	3.21196e+07
TRUE	High	Master Protein	P27361	Mitogen-activated protein kinase 3 OS=Homo sapiens OX=9606 GN=MAPK3 PE=1 SV=4	13	MAPK3	3.10188e+07	4.25629e+07	1.48776e+07	2.78655e+07	1.93999e+07	5.02994e+07	1.7733e+07	2.04172e+07	3.17325e+07	1.75323e+07	2.20108e+07	5.04313e+07	2.32079e+07	4.85236e+06	2.73211e+07	1.96216e+07	2.00525e+07	7.86936e+06	2.01079e+06	2.7313e+06	4.73387e+07	2.54107e+07	2.86115e+08	3.11656e+08	2.78668e+07	7.48646e+07	8.59654e+07	5.55342e+07	9.15493e+07	5.55645e+07	4.86398e+07
TRUE	High	Master Protein	Q8NBS9	Thioredoxin domain-containing protein 5 OS=Homo sapiens OX=9606 GN=TXNDC5 PE=1 SV=2	17	TXNDC5	1.97213e+08	1.75969e+08	9.70596e+07	3.96485e+08	7.9764e+07	3.30376e+08	2.9208e+08	2.39378e+08	2.44407e+08	4.94547e+08	2.70903e+08	2.20084e+08	1.58073e+08	1.27779e+08	2.21991e+08	1.85426e+08	1.30165e+08	6.90183e+07	4.97875e+07	3.76583e+07	1.0316e+09	2.957e+08	1.43756e+09	7.81256e+08	2.06549e+08	1.5898e+08	1.51387e+08	2.0852e+08	3.6467e+08	3.17451e+08	1.18999e+09
TRUE	High	Master Protein	P30044	Peroxiredoxin-5, mitochondrial OS=Homo sapiens OX=9606 GN=PRDX5 PE=1 SV=4	14	PRDX5	5.68663e+08	6.608e+08	4.00397e+08	4.83785e+08	3.75242e+08	2.99349e+08	4.08221e+08	2.82002e+08	4.45306e+08	4.07285e+08	5.05785e+08	3.49606e+08	2.86416e+08	1.42092e+08	5.96073e+08	5.15734e+08	1.97073e+08	5.88757e+08	1.01935e+08	1.08669e+08	2.86847e+08	5.35824e+08	6.39371e+08	3.60139e+08	6.46005e+08	1.05459e+09	4.54272e+08	8.7555e+08	6.47325e+08	8.00085e+08	4.32399e+08
TRUE	High	Master Protein	Q6DD88	Atlastin-3 OS=Homo sapiens OX=9606 GN=ATL3 PE=1 SV=1	5	ATL3	8.69169e+07	6.82791e+07	3.46406e+07	7.29404e+07	8.42768e+07	8.68421e+07	4.2106e+07	8.65356e+07	9.11137e+07	1.30824e+08	1.22808e+08	2.31017e+07	2.68983e+07	6.58966e+06	7.81837e+07	4.02544e+07	2.39397e+07	9.83588e+06	4.54436e+06	1.22622e+07	4.47999e+07	4.59618e+07	6.6184e+07	3.34429e+07	1.22496e+07	1.57175e+07	9.35989e+06	1.63813e+07	1.92253e+07	1.65318e+07	2.57198e+07
TRUE	High	Master Protein	O43852	Calumenin OS=Homo sapiens OX=9606 GN=CALU PE=1 SV=2	15	CALU	2.75621e+08	1.36363e+08	1.57928e+08	1.27031e+08	5.96416e+07	1.04358e+08	1.49883e+08	9.68217e+07	1.40817e+08	1.33877e+08	1.42845e+08	6.51777e+07	1.16024e+08	8.25205e+07	1.6008e+08	2.39393e+08	1.36945e+08	3.46609e+07	4.83397e+07	1.19343e+08	3.34822e+08	2.18581e+08	8.82005e+07	8.81683e+07	3.27665e+07	5.8458e+07	2.71139e+07	7.23661e+07	6.09774e+07	8.04638e+07	1.24026e+08
TRUE	High	Master Protein	Q9UHB6	LIM domain and actin-binding protein 1 OS=Homo sapiens OX=9606 GN=LIMA1 PE=1 SV=1	17	LIMA1	4.44569e+07	1.52741e+08	3.81449e+07	8.07558e+07	3.86055e+07	3.48578e+07	2.56673e+07	4.1582e+07	1.4002e+08	8.70396e+07	1.09656e+08	1.382e+07	4.08142e+07	2.50166e+07	1.35952e+07	4.11699e+07	2.67909e+07	2.31605e+07	1.35622e+07	1.56348e+07	3.57873e+07	8.16505e+07	1.40339e+08	1.64385e+07	1.83572e+07	2.37294e+07	2.90714e+07	2.01862e+07	5.33555e+07	4.40483e+07	4.82525e+07
TRUE	High	Master Protein	D6RF35	Vitamin D-binding protein OS=Homo sapiens OX=9606 GN=GC PE=1 SV=1	4		351163	351756	4.21619e+07	195672	4.94935e+06	1.55431e+06	624065	2.15292e+07	3.73994e+06	339172	1.26614e+07	401490	252235	182585	314208	1.08339e+06	282862	1.75652e+07	208244	215898	92980.9	265750	1.91938e+06	4.16976e+07	2.75534e+07	1.67415e+06	77799.6	1.43705e+06	322982	3.72012e+07	41547
TRUE	High	Master Protein	P22102	Trifunctional purine biosynthetic protein adenosine-3 OS=Homo sapiens OX=9606 GN=GART PE=1 SV=1	19	GART	5.56963e+07	5.54697e+07	3.93596e+07	8.68009e+07	4.09393e+07	4.36185e+07	2.57571e+07	3.12356e+07	3.99822e+07	4.90404e+07	3.0791e+07	5.35546e+07	6.47355e+07	1.04483e+07	4.74208e+07	6.69974e+07	3.9094e+07	3.13514e+07	1.89101e+07	8.2498e+06	9.94801e+07	4.33662e+07	5.37564e+07	9.79806e+06	1.11756e+07	1.9608e+07	3.13447e+07	1.84154e+07	1.09264e+08	4.05366e+07	7.27223e+07
TRUE	High	Master Protein	P02748	Complement component C9 OS=Homo sapiens OX=9606 GN=C9 PE=1 SV=2	18	C9	2.89492e+07	3.77625e+07	6.95944e+07	3.55093e+07	6.85312e+07	1.69447e+07	5.30586e+07	5.05214e+07	2.65569e+07	2.80882e+07	9.46202e+07	4.9471e+07	9.14677e+07	2.69091e+08	5.50004e+07	3.22243e+07	4.02177e+07	1.6684e+08	4.17296e+08	5.61785e+07	4.04891e+07	5.83664e+07	4.45555e+06	2.88849e+07	1.10488e+08	1.98897e+07	1.00819e+08	7.48684e+07	3.9717e+07	1.38428e+08	1.608e+07
TRUE	High	Master Protein	Q15393	Splicing factor 3B subunit 3 OS=Homo sapiens OX=9606 GN=SF3B3 PE=1 SV=4	23	SF3B3	7.6813e+07	7.8876e+07	3.94305e+07	1.09051e+08	2.66226e+07	7.51136e+07	2.40055e+07	3.26403e+07	4.96808e+07	5.55779e+07	3.77137e+07	4.14199e+07	5.25977e+07	2.3738e+07	5.95515e+07	6.29995e+07	4.67694e+07	3.46054e+07	1.58891e+07	7.59998e+06	9.29342e+07	8.08314e+07	7.37556e+07	7.09648e+07	3.68315e+07	1.09163e+08	4.23575e+08	1.81862e+08	9.07949e+07	5.83002e+07	8.81607e+07
TRUE	High	Master Protein	O15143	Actin-related protein 2/3 complex subunit 1B OS=Homo sapiens OX=9606 GN=ARPC1B PE=1 SV=3	12	ARPC1B	2.0632e+08	2.4435e+08	1.31235e+08	3.11571e+08	1.27221e+08	1.63217e+08	9.57566e+07	1.25159e+08	3.38175e+08	2.33622e+08	1.85593e+08	1.96348e+08	1.16362e+08	8.61701e+07	1.35394e+08	1.64375e+08	1.38018e+08	6.4481e+07	3.38981e+07	3.28573e+07	2.52113e+08	2.16839e+08	2.4368e+08	7.60973e+07	1.0528e+08	1.23087e+08	6.74654e+07	1.6175e+08	3.23382e+08	2.57927e+08	3.53949e+08
TRUE	High	Master Protein	O60547	GDP-mannose 4,6 dehydratase OS=Homo sapiens OX=9606 GN=GMDS PE=1 SV=1	15	GMDS	4.3653e+07	3.37175e+08	1.43277e+08	2.6231e+08	2.25134e+07	1.94275e+08	1.20082e+08	1.80498e+08	3.7697e+08	3.37885e+08	1.71391e+08	1.25669e+08	8.39041e+07	3.34661e+07	2.13407e+08	1.76052e+08	4.436e+07	4.38905e+07	6.41342e+07	2.87741e+07	6.1579e+07	1.94012e+08	1.22422e+08	3.20424e+07	1.56943e+08	9.27964e+07	1.24909e+08	5.71975e+07	1.76587e+08	1.40523e+08	3.06963e+07
TRUE	High	Master Protein	Q86W92	Liprin-beta-1 OS=Homo sapiens OX=9606 GN=PPFIBP1 PE=1 SV=2	22	PPFIBP1	4.09921e+07	8.65568e+07	4.66566e+07	6.15943e+07	4.37396e+07	1.01428e+08	5.03857e+07	1.55415e+08	1.07001e+08	1.47068e+08	6.63087e+07	2.18988e+07	3.52458e+07	3.15357e+07	5.24267e+07	2.69017e+07	7.94139e+07	5.27019e+07	6.0349e+07	2.61366e+07	7.04642e+07	4.19399e+07	4.36195e+07	7.15602e+07	4.39936e+07	6.08368e+07	4.0396e+07	4.5375e+07	1.10787e+08	8.34378e+07	4.90519e+07
TRUE	High	Master Protein	Q9BTV4	Transmembrane protein 43 OS=Homo sapiens OX=9606 GN=TMEM43 PE=1 SV=1	16	TMEM43	2.26206e+08	9.81031e+07	5.28934e+07	1.39964e+08	6.77308e+07	1.90234e+08	1.26367e+08	8.19974e+07	1.26146e+08	1.31011e+08	1.34698e+08	1.10967e+08	1.00572e+08	7.91412e+07	1.19541e+08	1.00299e+08	9.63346e+07	4.86979e+07	1.0025e+08	1.16478e+08	1.40589e+08	1.19196e+08	2.91137e+08	8.44832e+07	3.14124e+07	1.24398e+08	6.58938e+07	9.62947e+07	5.15605e+07	1.02818e+08	1.99451e+08
TRUE	High	Master Protein	P21291	Cysteine and glycine-rich protein 1 OS=Homo sapiens OX=9606 GN=CSRP1 PE=1 SV=3	12	CSRP1	1.62613e+08	4.35966e+08	3.67373e+07	2.03764e+08	1.14917e+08	1.4325e+08	1.58854e+08	8.7743e+07	1.63497e+08	9.57574e+07	9.0858e+07	7.73373e+07	3.68882e+08	3.14712e+08	1.20529e+08	1.6767e+08	1.06064e+08	1.21782e+08	9.3174e+07	5.32061e+07	2.79047e+08	2.66087e+08	3.4731e+07	1.8943e+07	3.55986e+07	1.26986e+08	2.09974e+08	3.08739e+08	7.12916e+07	6.65833e+07	1.00235e+08
TRUE	High	Master Protein	P62937	Peptidyl-prolyl cis-trans isomerase A OS=Homo sapiens OX=9606 GN=PPIA PE=1 SV=2	14	PPIA	2.62879e+09	1.63319e+09	1.59923e+09	1.72858e+09	2.2675e+09	1.16191e+09	1.72616e+09	1.07398e+09	1.74821e+09	2.36504e+09	1.63224e+09	1.22868e+09	1.63112e+09	6.96285e+08	1.70872e+09	1.76864e+09	1.49399e+09	1.14321e+09	6.64977e+08	5.42222e+08	1.76405e+09	2.03232e+09	8.36365e+08	8.58234e+08	3.74579e+08	7.64664e+08	1.04378e+09	7.78201e+08	1.003e+09	7.50983e+08	1.83251e+09
TRUE	High	Master Protein	O43301	Heat shock 70 kDa protein 12A OS=Homo sapiens OX=9606 GN=HSPA12A PE=1 SV=2	21	HSPA12A	1.91812e+08	6.67328e+07	4.12721e+07	6.54553e+07	8.55872e+07	8.47927e+07	7.22191e+07	6.45717e+07	1.13173e+08	2.07101e+08	7.86486e+07	8.15139e+06	1.90129e+07	1.50138e+07	2.0419e+07	1.07532e+08	2.69778e+07	2.15425e+07	2.78386e+07	2.36841e+07	6.73703e+07	5.63102e+07	6.36654e+07	1.8003e+07	4.25587e+07	4.6382e+07	1.2822e+08	4.27268e+07	5.68114e+07	3.32604e+07	6.33167e+07
TRUE	High	Master Protein	Q9Y696	Chloride intracellular channel protein 4 OS=Homo sapiens OX=9606 GN=CLIC4 PE=1 SV=4	15	CLIC4	1.31139e+08	1.58174e+08	1.0128e+08	1.01984e+08	1.49858e+08	1.20504e+08	1.43951e+08	7.5647e+07	1.64734e+08	4.97321e+07	1.30908e+08	1.61103e+07	4.68034e+07	3.81437e+07	6.87578e+07	3.74442e+07	6.64131e+07	4.05288e+07	2.72894e+07	1.16156e+07	7.92539e+07	5.00616e+07	1.80742e+07	1.81263e+07	2.11464e+07	2.02625e+07	2.48919e+07	4.46177e+07	1.39941e+07	5.20231e+07	8.30562e+07
TRUE	High	Master Protein	P42224	Signal transducer and activator of transcription 1-alpha/beta OS=Homo sapiens OX=9606 GN=STAT1 PE=1 SV=2	23	STAT1	3.2671e+07	4.09895e+07	4.56529e+07	6.92112e+07	6.17421e+07	6.05769e+07	2.96676e+07	2.45254e+07	4.80301e+07	5.12662e+07	5.58214e+07	3.33994e+07	3.65861e+07	1.24367e+07	4.32577e+07	8.62879e+07	6.18964e+07	3.1076e+07	2.49663e+07	2.59216e+07	2.85562e+08	4.13131e+07	1.48501e+07	4.91517e+06	1.75002e+07	3.47089e+07	1.26361e+08	4.0312e+07	9.31801e+07	4.1417e+07	2.24858e+07
TRUE	High	Master Protein	O00571	ATP-dependent RNA helicase DDX3X OS=Homo sapiens OX=9606 GN=DDX3X PE=1 SV=3	6	DDX3X	9.66269e+07	8.79091e+07	5.18519e+07	1.298e+08	8.2046e+07	1.01331e+08	7.43988e+07	7.15702e+07	1.17151e+08	1.30798e+08	8.42563e+07	2.58106e+08	1.10229e+08	5.52087e+07	1.36114e+08	1.00537e+08	7.32808e+07	2.96726e+07	1.5117e+07	1.41406e+07	1.5247e+08	1.20703e+08	4.23617e+07	1.13854e+08	5.87961e+07	6.75126e+07	1.02809e+08	4.97142e+07	1.52504e+08	8.61708e+07	2.59571e+08
TRUE	High	Master Protein	Q9UQE7	Structural maintenance of chromosomes protein 3 OS=Homo sapiens OX=9606 GN=SMC3 PE=1 SV=2	23	SMC3	7.59119e+07	9.84156e+07	3.58209e+07	6.87786e+07	6.045e+07	8.00458e+07	2.4752e+07	2.83238e+07	3.39479e+07	6.46001e+07	2.61926e+07	2.05541e+07	3.10371e+07	1.19659e+07	2.22244e+07	3.69715e+07	5.46405e+07	1.16611e+07	7.94271e+06	6.67109e+06	6.30141e+07	5.54197e+07	1.78725e+07	6.48419e+07	7.07044e+06	1.66482e+07	1.68562e+07	1.71645e+07	3.061e+07	1.78068e+07	9.0802e+06
TRUE	High	Master Protein	P62879	Guanine nucleotide-binding protein G(I)/G(S)/G(T) subunit beta-2 OS=Homo sapiens OX=9606 GN=GNB2 PE=1 SV=3	4	GNB2	2.63019e+08	1.62243e+08	8.83537e+07	1.2228e+08	1.2771e+08	1.68197e+08	1.05932e+08	5.91762e+07	1.02251e+08	1.21525e+08	1.40829e+08	7.25263e+07	1.28233e+08	1.35563e+08	1.27085e+08	1.45704e+08	8.95455e+07	7.21472e+07	7.84378e+07	2.27543e+07	2.55761e+08	1.68153e+08	7.52384e+07	1.10335e+08	2.49589e+07	7.50421e+07	9.81207e+07	7.78381e+07	1.19197e+08	5.26803e+07	6.50363e+07
TRUE	High	Master Protein	P62136	Serine/threonine-protein phosphatase PP1-alpha catalytic subunit OS=Homo sapiens OX=9606 GN=PPP1CA PE=1 SV=1	4	PPP1CA	1.4586e+07	1.2091e+07	1.11274e+07	1.73256e+07	6.71218e+06	5.26387e+06	3.13848e+06	5.71053e+07	7.84167e+06	1.87407e+07	4.93601e+06	1.29268e+06	4.70424e+06	4.30852e+06	5.00573e+06	1.29234e+07	1.67932e+07	1.81033e+06	9.21899e+06	1.80002e+06	9.6283e+06	2.6912e+07	1.78875e+07	529743	3.14302e+06	6.40853e+07	1.47723e+07	1.62588e+07	1.98367e+07	4.41293e+07	1.6475e+07
TRUE	High	Master Protein	O43865	S-adenosylhomocysteine hydrolase-like protein 1 OS=Homo sapiens OX=9606 GN=AHCYL1 PE=1 SV=2	5	AHCYL1	7.46692e+06	8.24509e+06	3.93359e+06	5.76551e+06	1.91366e+06	7.2655e+06	1.37542e+06	2.28012e+06	4.07895e+06	1.71916e+06	447215	316196	773614	1.53404e+06	1.16124e+06	489194	692613	480386	893597	1.48056e+06	2.84953e+06	2.58216e+06	525207	7.961e+06	1.58653e+07	2.95645e+07	8.48808e+07	3.64464e+07	1.13131e+08	2.19451e+07	1.27325e+08
TRUE	High	Master Protein	P21589	5'-nucleotidase OS=Homo sapiens OX=9606 GN=NT5E PE=1 SV=1	17	NT5E	1.67025e+08	1.78628e+08	1.79941e+08	1.16936e+08	1.01982e+08	2.36905e+08	5.14459e+07	1.62583e+08	2.40696e+08	1.779e+08	1.84442e+08	2.24171e+07	9.16322e+07	6.19883e+07	1.13967e+08	4.52407e+07	1.04953e+08	3.68257e+07	6.82683e+07	6.05692e+08	8.85336e+07	3.54906e+07	1.98389e+08	9.20182e+07	9.63141e+07	1.02776e+08	9.18728e+07	1.40532e+08	3.39724e+08	2.09204e+08	1.33427e+08
TRUE	High	Master Protein	Q9NZ08	Endoplasmic reticulum aminopeptidase 1 OS=Homo sapiens OX=9606 GN=ERAP1 PE=1 SV=3	27	ERAP1	6.28449e+07	7.78817e+07	4.03917e+07	1.52838e+08	6.32578e+07	1.00588e+08	8.31474e+07	1.35594e+08	5.70008e+07	5.93369e+07	5.37167e+07	7.96304e+07	4.74177e+07	1.78182e+07	3.74268e+07	6.33845e+07	8.6722e+07	4.08148e+07	2.67889e+07	1.64659e+07	9.90761e+07	2.08237e+08	8.56435e+07	6.77589e+07	3.24341e+07	7.00176e+07	3.74466e+07	5.60574e+07	1.19457e+08	8.74385e+07	1.40257e+08
TRUE	High	Master Protein	P40121	Macrophage-capping protein OS=Homo sapiens OX=9606 GN=CAPG PE=1 SV=2	14	CAPG	3.3226e+08	2.11585e+08	8.96129e+07	2.2522e+08	9.76229e+07	1.12404e+08	1.81276e+07	3.78232e+07	2.06588e+08	1.95879e+08	2.37185e+08	2.99309e+08	7.98664e+07	2.05286e+07	2.1699e+08	8.77349e+07	1.14816e+08	4.37362e+07	4.84093e+07	2.09125e+07	1.41896e+08	1.46608e+08	8.02277e+07	3.96254e+07	1.97766e+07	2.47535e+07	2.59334e+07	6.58293e+07	2.13694e+08	1.13587e+08	1.65881e+08
TRUE	High	Master Protein	Q92599	Septin-8 OS=Homo sapiens OX=9606 GN=SEPT8 PE=1 SV=4	14	SEPT8	5.97624e+07	9.36372e+07	4.71537e+07	2.77777e+07	8.52016e+07	5.95854e+07	5.58863e+07	3.92678e+07	8.96112e+07	5.44679e+07	6.03748e+07	2.81204e+07	5.09325e+07	1.62358e+07	1.67605e+07	1.11376e+08	6.06443e+07	3.63364e+07	1.2493e+07	6.14603e+07	5.99887e+07	7.49427e+07	4.53128e+07	7.45982e+07	8.31041e+07	1.04401e+08	6.28285e+07	8.47876e+07	4.96905e+07	8.02784e+07	3.10071e+07
TRUE	High	Master Protein	P49591	Serine--tRNA ligase, cytoplasmic OS=Homo sapiens OX=9606 GN=SARS PE=1 SV=3	16	SARS	1.00466e+08	1.21855e+08	1.00028e+08	1.23577e+08	6.3925e+07	7.24018e+07	6.09708e+07	4.94895e+07	9.07842e+07	9.62522e+07	1.12106e+08	7.66152e+07	7.11728e+07	3.42682e+07	6.14835e+07	1.42754e+08	5.06575e+07	6.23443e+07	2.10787e+07	2.98348e+07	1.46319e+08	9.38989e+07	3.29665e+07	4.36341e+06	2.35395e+07	6.14892e+07	1.00778e+08	5.50131e+07	1.18257e+08	6.75719e+07	1.05391e+08
TRUE	High	Master Protein	O60763	General vesicular transport factor p115 OS=Homo sapiens OX=9606 GN=USO1 PE=1 SV=2	23	USO1	8.32633e+07	1.26419e+08	6.51752e+07	1.65403e+08	1.16815e+08	1.21845e+08	1.29862e+08	5.79213e+08	1.15159e+08	1.37724e+08	6.89527e+07	2.57766e+08	6.08326e+07	3.93408e+07	1.2712e+08	1.79658e+08	7.49796e+07	8.06771e+07	4.62443e+07	2.03578e+07	1.34474e+08	1.95395e+08	1.37613e+08	7.74706e+08	4.2304e+07	3.49987e+07	3.64502e+07	5.39854e+07	1.41221e+08	8.14299e+07	1.32758e+08
TRUE	High	Master Protein	O14617	AP-3 complex subunit delta-1 OS=Homo sapiens OX=9606 GN=AP3D1 PE=1 SV=1	21	AP3D1	5.02046e+07	5.32203e+07	2.18634e+07	8.5782e+07	4.64851e+07	4.01149e+07	8.30222e+07	4.64896e+07	4.71784e+07	5.59817e+07	4.20064e+07	2.4828e+07	1.33328e+07	1.0785e+07	3.5974e+07	4.26978e+07	2.85016e+07	1.90346e+07	1.97476e+07	9.25346e+06	7.40665e+07	4.45135e+07	2.42984e+08	3.301e+08	1.9053e+07	1.92143e+07	3.79137e+07	2.18571e+07	1.17624e+08	2.32448e+07	2.49969e+07
TRUE	High	Master Protein	O95460	Matrilin-4 OS=Homo sapiens OX=9606 GN=MATN4 PE=1 SV=3	19	MATN4	1.0521e+07	2.04662e+07	1.01353e+07	6.92797e+06	3.18587e+07	9.96885e+06	8.73169e+06	6.44429e+07	1.67917e+07	1.38168e+07	1.89531e+07	7.19586e+06	4.09271e+07	2.12711e+08	2.88226e+07	1.94062e+07	6.91573e+06	1.07986e+08	3.89566e+07	5.45713e+06	2.09802e+07	3.83602e+07	1.17339e+08	4.98845e+06	8.64441e+06	1.13173e+08	3.37106e+07	1.5925e+08	6.96308e+06	6.71396e+06	1.10448e+07
TRUE	High	Master Protein	P17600	Synapsin-1 OS=Homo sapiens OX=9606 GN=SYN1 PE=1 SV=3	16	SYN1	1.38433e+07	1.43759e+07	6.39708e+06	2.16224e+07	2.42206e+07	9.46757e+06	5.45293e+06	1.10448e+07	7.1916e+06	4.00818e+07	7.95367e+06	6.5227e+06	1.49615e+07	7.09971e+06	8.40743e+06	3.08219e+08	9.21494e+06	1.47931e+07	2.81127e+06	1.9166e+06	1.65394e+07	2.50361e+06	7.74354e+06	2.11467e+06	2.6252e+07	9.90998e+07	7.87097e+08	3.94636e+07	1.4226e+07	6.95775e+06	8.60877e+06
TRUE	High	Master Protein	A0FGR8	Extended synaptotagmin-2 OS=Homo sapiens OX=9606 GN=ESYT2 PE=1 SV=1	24	ESYT2	6.05156e+07	3.75881e+07	3.5486e+07	5.47949e+07	3.30713e+07	3.83777e+07	3.5422e+07	3.58807e+07	9.4119e+07	2.1548e+07	7.98222e+07	1.75659e+07	2.17153e+07	3.20305e+07	2.84008e+07	2.50013e+07	3.73886e+07	1.22741e+07	1.47371e+07	1.3466e+07	4.92467e+07	6.32589e+07	2.65695e+07	1.0345e+07	1.74578e+07	1.8123e+07	3.97544e+07	1.76585e+07	2.62074e+07	2.02893e+07	7.36576e+07
TRUE	High	Master Protein	P01042	Kininogen-1 OS=Homo sapiens OX=9606 GN=KNG1 PE=1 SV=2	21	KNG1	7.19851e+07	7.7342e+07	1.11773e+08	1.00723e+08	1.82801e+08	2.61576e+08	2.67925e+08	1.73876e+08	1.03731e+08	8.99459e+07	2.57974e+08	1.19168e+08	1.1161e+08	2.23981e+08	7.18222e+07	6.51213e+07	1.8885e+08	2.78285e+08	2.01883e+08	3.58711e+08	7.29293e+07	1.128e+08	4.14967e+08	5.07215e+08	1.16812e+08	1.06864e+08	1.45152e+08	1.2082e+08	4.91174e+07	1.63517e+08	3.68818e+07
TRUE	High	Master Protein	P62873	Guanine nucleotide-binding protein G(I)/G(S)/G(T) subunit beta-1 OS=Homo sapiens OX=9606 GN=GNB1 PE=1 SV=3	8	GNB1	2.36049e+08	3.17814e+08	2.35527e+08	3.10092e+08	2.71759e+08	3.65117e+08	3.1883e+08	1.81234e+08	4.03361e+08	3.3582e+08	1.74206e+08	1.65397e+08	2.35636e+08	1.45271e+08	2.30302e+08	3.89586e+08	1.47209e+08	1.98086e+08	5.02096e+07	4.73002e+07	2.095e+08	5.6456e+08	1.8373e+08	1.08443e+08	1.08526e+08	3.44864e+08	7.09496e+08	3.34811e+08	3.15325e+08	2.10887e+08	3.58054e+08
TRUE	High	Master Protein	Q9UQ80	Proliferation-associated protein 2G4 OS=Homo sapiens OX=9606 GN=PA2G4 PE=1 SV=3	18	PA2G4	2.24881e+08	1.82506e+08	5.68153e+07	1.86149e+08	1.00315e+08	2.03346e+08	7.79727e+07	1.08857e+08	7.35503e+07	1.34269e+08	1.18508e+08	8.47779e+07	1.08838e+08	4.56166e+07	1.35134e+08	8.99867e+07	1.0609e+08	4.72944e+07	4.77302e+07	3.53943e+07	1.37404e+08	1.14138e+08	5.45742e+07	2.4026e+08	8.10352e+07	1.33752e+08	6.77453e+07	7.43068e+07	1.88998e+08	8.86462e+07	1.39968e+08
TRUE	High	Master Protein	P05164	Myeloperoxidase OS=Homo sapiens OX=9606 GN=MPO PE=1 SV=1	20	MPO	2.18507e+07	1.98259e+07	2.54718e+07	4.58954e+07	1.52438e+07	2.20976e+07	1.68904e+07	2.55472e+07	1.21945e+07	1.87931e+07	2.30353e+07	5.71136e+08	7.67661e+07	3.23302e+07	9.05939e+07	2.51258e+07	1.39905e+08	3.93144e+07	6.04423e+07	3.27682e+07	2.26958e+07	1.42741e+08	2.11887e+08	4.09641e+07	9.39006e+07	1.71292e+08	1.23947e+08	8.64457e+07	1.42509e+08	1.99513e+08	6.19271e+07
TRUE	High	Master Protein	P15104	Glutamine synthetase OS=Homo sapiens OX=9606 GN=GLUL PE=1 SV=4	16	GLUL	2.39336e+08	4.69882e+07	6.88299e+07	4.02996e+08	1.78959e+08	6.18338e+07	3.40189e+08	7.03273e+07	3.35178e+07	1.03631e+08	4.66929e+07	1.70348e+08	4.03012e+08	7.85496e+07	4.32694e+07	2.20825e+08	1.90545e+08	1.09573e+08	9.86515e+07	1.02561e+07	9.81093e+07	7.7889e+07	1.29898e+08	2.47175e+08	6.95806e+07	2.39601e+08	4.73365e+08	1.63752e+08	2.57323e+08	1.22843e+08	8.66562e+08
TRUE	High	Master Protein	Q5T4S7	E3 ubiquitin-protein ligase UBR4 OS=Homo sapiens OX=9606 GN=UBR4 PE=1 SV=1	30	UBR4	1.9123e+07	2.32503e+07	3.08625e+07	3.02748e+07	1.6944e+07	2.99446e+07	2.03315e+07	1.27918e+07	2.83557e+07	1.82925e+07	2.97556e+07	2.58875e+07	5.99492e+07	9.60853e+07	3.69465e+07	1.61682e+07	5.28381e+07	2.30617e+07	2.85167e+07	5.78161e+07	6.08338e+07	3.57227e+07	1.43193e+08	1.38273e+07	9.76894e+06	2.01827e+07	4.96666e+07	9.08881e+06	5.27195e+07	2.5512e+07	1.01599e+07
TRUE	High	Master Protein	Q12905	Interleukin enhancer-binding factor 2 OS=Homo sapiens OX=9606 GN=ILF2 PE=1 SV=2	17	ILF2	1.34282e+08	1.81663e+08	8.64603e+07	2.0317e+08	8.11459e+07	1.72802e+08	8.60664e+07	9.54265e+07	1.20983e+08	1.30709e+08	1.25593e+08	9.57024e+07	9.01235e+07	2.97724e+07	1.51417e+08	2.12997e+08	1.04769e+08	5.14323e+07	1.96462e+07	2.00914e+07	2.2461e+08	1.8151e+08	1.61684e+08	1.00765e+08	4.17616e+07	9.25343e+07	9.82889e+07	7.91644e+07	2.8629e+08	1.352e+08	1.05017e+08
TRUE	High	Master Protein	P48506	Glutamate--cysteine ligase catalytic subunit OS=Homo sapiens OX=9606 GN=GCLC PE=1 SV=2	19	GCLC	2.40512e+07	2.68211e+07	2.01782e+07	2.2879e+07	1.28989e+07	1.69328e+07	1.69108e+08	8.58886e+07	3.81533e+07	4.33944e+07	6.8671e+07	4.31707e+07	1.7292e+07	1.10147e+07	2.21881e+07	2.14267e+08	6.16087e+07	2.61725e+07	2.02318e+07	3.14994e+07	6.98176e+07	5.15729e+07	3.0763e+07	2.34856e+07	2.48693e+07	4.88552e+07	3.98402e+07	3.09675e+07	4.19815e+07	2.59175e+07	5.2983e+07
TRUE	High	Master Protein	Q9P266	Junctional protein associated with coronary artery disease OS=Homo sapiens OX=9606 GN=JCAD PE=1 SV=3	20	KIAA1462; JCAD	6.96502e+07	8.29287e+07	1.90162e+07	4.45506e+07	2.91615e+07	5.6726e+07	5.05646e+07	8.58318e+07	1.19715e+08	6.27735e+07	4.64123e+07	1.668e+07	6.4828e+06	7.65015e+06	5.49002e+06	2.34376e+07	2.41969e+07	5.86775e+06	9.38379e+06	6.44792e+06	2.57759e+07	3.50158e+07	3.09953e+07	6.35305e+06	9.66556e+06	1.78347e+07	2.16602e+07	8.52899e+06	2.69216e+07	1.38477e+07	1.21296e+07
TRUE	High	Master Protein	P04439	HLA class I histocompatibility antigen, A-3 alpha chain OS=Homo sapiens OX=9606 GN=HLA-A PE=1 SV=2	3	HLA-A	1.64864e+08	1.9371e+08	2.1696e+08	3.33405e+08	1.32364e+08	1.31121e+08	1.61032e+08	1.70507e+08	1.90218e+08	1.54082e+08	1.83906e+08	1.38799e+08	1.03484e+08	1.77256e+07	6.34853e+07	3.06916e+08	1.32569e+08	9.80529e+07	2.00018e+07	8.26187e+07	1.81192e+08	1.96168e+08	1.06511e+08	6.29587e+06	3.46982e+07	1.02698e+08	5.36212e+07	4.44934e+07	8.63731e+07	5.84965e+07	1.1287e+08
TRUE	High	Master Protein	P00441	Superoxide dismutase [Cu-Zn] OS=Homo sapiens OX=9606 GN=SOD1 PE=1 SV=2	7	SOD1	3.31393e+08	2.73717e+08	5.08203e+07	2.17943e+08	2.35016e+08	3.86478e+08	2.64606e+08	1.3517e+08	2.609e+08	3.82719e+08	6.78541e+07	8.82482e+07	1.36952e+08	6.85647e+07	1.31969e+08	1.51906e+08	1.204e+08	1.53371e+08	7.49003e+07	1.92834e+08	1.01601e+08	1.16119e+08	1.4974e+08	4.38458e+08	1.14078e+08	9.28716e+07	1.31647e+08	8.84266e+07	2.63295e+08	1.8412e+08	2.0426e+08
TRUE	High	Master Protein	Q14126	Desmoglein-2 OS=Homo sapiens OX=9606 GN=DSG2 PE=1 SV=2	20	DSG2	2.30486e+07	2.03592e+08	1.08179e+07	6.56267e+07	2.94707e+07	2.56848e+07	1.42887e+08	2.58703e+08	1.54776e+07	7.11917e+07	2.90728e+07	2.34561e+07	2.05546e+07	5.81279e+06	2.0139e+07	1.86598e+07	1.0001e+08	1.65501e+07	3.76506e+06	8.3585e+06	3.65328e+07	1.24155e+08	2.85408e+07	1.07458e+07	8.35259e+07	5.9596e+07	3.25455e+07	7.19902e+07	8.50731e+07	3.87781e+07	5.80571e+07
TRUE	High	Master Protein	P05155	Plasma protease C1 inhibitor OS=Homo sapiens OX=9606 GN=SERPING1 PE=1 SV=2	19	SERPING1	4.8796e+07	3.10071e+07	5.91049e+07	6.37997e+07	8.71979e+07	4.88637e+07	8.35709e+07	1.07853e+08	5.17745e+07	5.57725e+07	1.03222e+08	1.00473e+08	1.23103e+08	3.08216e+08	5.204e+07	1.09509e+08	1.15167e+08	3.34959e+08	3.01161e+08	9.8746e+07	8.80676e+07	6.86686e+07	9.32526e+07	1.80807e+07	1.05211e+08	7.53912e+07	1.49059e+08	1.21379e+08	6.76655e+07	1.88576e+08	6.3105e+07
TRUE	High	Master Protein	Q6ZMJ2	Scavenger receptor class A member 5 OS=Homo sapiens OX=9606 GN=SCARA5 PE=1 SV=1	16	SCARA5	4.42589e+07	1.65136e+08	3.05123e+07	9.60985e+07	2.05027e+07	2.22443e+08	4.1816e+06	6.95846e+06	8.97869e+07	5.59141e+07	7.60134e+07	4.57846e+07	7.71542e+07	1.67104e+07	1.05086e+08	1.86329e+07	2.68764e+07	9.82788e+06	1.47602e+07	5.44251e+06	1.45353e+08	9.30641e+07	1.71164e+08	4.30818e+07	3.77647e+07	4.07076e+07	3.12122e+07	2.41085e+07	1.23195e+08	8.94061e+07	4.20394e+07
TRUE	High	Master Protein	P43686	26S proteasome regulatory subunit 6B OS=Homo sapiens OX=9606 GN=PSMC4 PE=1 SV=2	21	PSMC4	7.82482e+07	9.4896e+07	7.14773e+07	1.13545e+08	7.71149e+07	7.38017e+07	6.59959e+07	5.04177e+07	8.25257e+07	9.5311e+07	5.23647e+07	2.33078e+07	2.78888e+07	2.50496e+07	3.51634e+07	3.41045e+07	3.88027e+07	1.34223e+07	1.36879e+07	1.00959e+07	6.73858e+07	1.09593e+08	3.41632e+07	3.75389e+07	5.1961e+07	3.63132e+07	5.60707e+07	5.67649e+07	1.17875e+08	8.9503e+07	7.15498e+07
TRUE	High	Master Protein	K7ENT6	Tropomyosin alpha-4 chain (Fragment) OS=Homo sapiens OX=9606 GN=TPM4 PE=1 SV=1	2		1.56608e+06	1.87529e+06	212209	2.99384e+06	1.0576e+06	581376	1.44872e+06	2.99325e+06	1.26705e+06	2.41103e+06	100152	8.848e+06	5.83267e+06	3.18565e+06	7.4662e+06	2.43066e+06	1.31451e+06	2.63706e+06	1.79496e+06	108764	7.02743e+06	309124	234298	181741	248307	207022	264050	7.94517e+07	4.40381e+06	2.53545e+07	207211
TRUE	High	Master Protein	Q92973	Transportin-1 OS=Homo sapiens OX=9606 GN=TNPO1 PE=1 SV=2	18	TNPO1	1.64026e+08	1.24699e+08	7.83294e+07	1.05794e+08	5.74823e+07	8.85679e+07	4.68567e+07	5.4695e+07	9.61211e+07	7.5905e+07	1.08392e+08	7.74645e+07	3.58549e+07	1.69307e+07	6.23937e+07	8.80342e+07	3.7703e+07	2.13046e+07	6.35712e+07	9.9265e+06	2.42485e+08	5.46616e+07	2.36134e+08	2.09337e+07	5.88241e+06	1.70136e+07	2.30724e+07	1.99514e+07	2.3163e+07	1.53811e+07	8.86892e+07
TRUE	High	Master Protein	Q9Y2W1	Thyroid hormone receptor-associated protein 3 OS=Homo sapiens OX=9606 GN=THRAP3 PE=1 SV=2	14	THRAP3	7.58305e+07	8.7505e+07	2.78579e+07	9.48412e+07	4.59972e+07	3.70098e+07	1.84351e+07	4.39967e+07	5.88253e+07	8.14132e+07	3.33477e+07	1.26987e+07	3.81146e+07	8.46018e+06	2.49025e+07	9.63465e+07	2.08834e+07	2.35126e+07	9.31371e+06	7.53031e+06	9.28046e+07	3.00419e+07	5.182e+07	3.26568e+07	1.37059e+07	9.41227e+06	1.49257e+07	5.24599e+06	4.0222e+07	2.25578e+07	3.2009e+07
TRUE	High	Master Protein	P37802	Transgelin-2 OS=Homo sapiens OX=9606 GN=TAGLN2 PE=1 SV=3	14	TAGLN2	4.09915e+08	2.99881e+08	2.0007e+08	2.22067e+08	2.19143e+08	2.52622e+08	4.10315e+08	2.4804e+08	3.46292e+08	2.5075e+08	5.93696e+08	2.19961e+08	1.59132e+08	2.12604e+08	1.44705e+08	1.23744e+08	3.76029e+08	8.61516e+07	1.20186e+08	7.12055e+07	2.43207e+08	4.48671e+08	3.8099e+08	1.60885e+08	8.26296e+07	2.20035e+08	3.05214e+08	4.39484e+08	1.44629e+08	4.23808e+08	4.98022e+08
TRUE	High	Master Protein	O43242	26S proteasome non-ATPase regulatory subunit 3 OS=Homo sapiens OX=9606 GN=PSMD3 PE=1 SV=2	19	PSMD3	1.25197e+08	1.51898e+08	9.69994e+07	1.43665e+08	9.6174e+07	1.17651e+08	8.76196e+07	7.36569e+07	1.35762e+08	1.16696e+08	1.14713e+08	5.28793e+08	8.93673e+07	4.35461e+07	1.26597e+08	1.29377e+08	1.34801e+08	8.10078e+07	1.46214e+08	6.15044e+07	1.58346e+08	1.16954e+08	1.62566e+08	1.85981e+08	7.74636e+07	4.10857e+07	8.72727e+07	9.31624e+07	1.50064e+08	5.65741e+07	4.79743e+07
TRUE	High	Master Protein	P08559	Pyruvate dehydrogenase E1 component subunit alpha, somatic form, mitochondrial OS=Homo sapiens OX=9606 GN=PDHA1 PE=1 SV=3	18	PDHA1	8.23883e+07	8.00533e+07	2.6078e+07	1.01502e+08	4.43349e+07	1.08348e+08	5.83953e+07	2.99264e+07	2.31301e+07	1.0507e+08	4.26741e+07	8.53062e+07	2.97192e+07	1.65393e+07	6.87384e+07	7.82027e+07	3.24506e+07	2.10276e+07	1.43311e+07	1.35611e+07	1.10479e+08	5.54381e+07	8.08721e+07	6.43061e+07	4.08403e+07	1.28477e+08	1.31132e+08	7.7916e+07	6.4475e+07	7.29151e+07	7.97012e+08
TRUE	High	Master Protein	Q13492	Phosphatidylinositol-binding clathrin assembly protein OS=Homo sapiens OX=9606 GN=PICALM PE=1 SV=2	11	PICALM	6.23799e+07	5.0692e+07	3.6231e+07	1.73609e+08	6.63313e+07	4.70719e+07	3.39271e+07	3.80244e+07	7.8829e+07	8.20319e+07	5.02283e+07	2.60531e+07	4.23425e+07	1.89334e+07	2.52642e+07	4.28626e+07	1.92078e+07	2.52403e+07	1.18025e+07	1.22639e+07	7.24664e+07	1.01974e+08	2.47911e+07	6.31337e+07	2.42087e+07	4.55629e+07	7.2303e+07	5.5873e+07	9.83889e+07	9.33484e+07	7.12421e+07
TRUE	High	Master Protein	Q05193	Dynamin-1 OS=Homo sapiens OX=9606 GN=DNM1 PE=1 SV=2	13	DNM1	3.86022e+06	7.29222e+06	1.1403e+07	1.63259e+07	1.504e+06	7.61184e+06	4.5269e+06	4.91108e+06	1.68906e+07	1.70253e+07	1.9267e+06	1.51873e+07	2.32157e+07	1.35122e+06	2.65076e+07	7.05326e+07	8.53742e+06	1.98971e+06	4.44254e+07	6.6067e+06	2.69055e+06	3.15081e+06	3.50664e+06	1.24089e+07	3.93179e+07	2.31659e+07	2.21292e+08	1.84717e+07	3.57093e+07	3.42465e+06	5.69057e+06
TRUE	High	Master Protein	Q13561	Dynactin subunit 2 OS=Homo sapiens OX=9606 GN=DCTN2 PE=1 SV=4	19	DCTN2	1.69354e+08	1.0199e+08	9.0858e+07	9.88691e+07	8.61133e+07	8.89094e+07	7.3567e+07	5.23936e+07	8.47976e+07	6.09948e+07	1.1188e+08	6.50909e+07	6.4334e+07	4.55108e+07	9.04577e+07	1.13815e+08	4.67366e+07	5.26981e+07	3.555e+07	2.2118e+07	4.83718e+07	6.81204e+07	8.21808e+07	6.51125e+07	6.85033e+07	7.7148e+07	1.74798e+08	9.28104e+07	3.24591e+08	2.30577e+08	2.91378e+08
TRUE	High	Master Protein	Q9UKG1	DCC-interacting protein 13-alpha OS=Homo sapiens OX=9606 GN=APPL1 PE=1 SV=1	19	APPL1	2.77032e+07	4.336e+07	1.79503e+07	5.28333e+07	2.4868e+07	2.83002e+07	2.36902e+07	1.98752e+07	3.40268e+07	3.33719e+07	3.1382e+07	3.18451e+07	3.10784e+07	2.3599e+07	3.22863e+07	2.04961e+07	2.40206e+07	1.11994e+07	1.64875e+07	1.67463e+06	3.47775e+07	3.37474e+07	9.08423e+06	1.10282e+07	4.61464e+06	1.25084e+07	2.11942e+06	3.6915e+06	2.61186e+07	4.94943e+07	2.05508e+07
TRUE	High	Master Protein	Q14141	Septin-6 OS=Homo sapiens OX=9606 GN=SEPT6 PE=1 SV=4	9	SEPT6	5.31932e+06	3.91886e+07	2.3053e+06	1.22478e+07	6.73775e+06	1.20956e+07	8.49347e+06	6.72125e+06	6.33189e+06	7.09831e+06	3.24246e+06	2.51669e+06	2.89895e+06	1.78922e+06	8.84409e+06	2.38646e+07	1.10099e+07	3.67495e+06	1.9642e+06	1.96897e+06	2.89051e+07	1.18761e+07	2.69528e+06	927150	1.0207e+06	8.41357e+06	2.01183e+07	5.2294e+06	1.19893e+07	4.85149e+06	1.06804e+07
TRUE	High	Master Protein	P61981	14-3-3 protein gamma OS=Homo sapiens OX=9606 GN=YWHAG PE=1 SV=2	11	YWHAG	2.20139e+08	2.27172e+08	2.95324e+08	2.74833e+08	2.13923e+08	1.91657e+08	2.49567e+08	1.28585e+08	2.88055e+08	1.9664e+08	4.2286e+08	3.76193e+07	2.20156e+08	9.35288e+07	8.39441e+07	4.26503e+08	1.69399e+08	1.17532e+08	7.53345e+07	8.63953e+07	5.87893e+08	1.80849e+08	2.38852e+07	2.11747e+06	2.38814e+07	6.48573e+07	1.60109e+08	5.53594e+07	1.11628e+08	9.48109e+07	1.23776e+08
TRUE	High	Master Protein	Q99613	Eukaryotic translation initiation factor 3 subunit C OS=Homo sapiens OX=9606 GN=EIF3C PE=1 SV=1	19	EIF3C	7.9393e+07	7.1687e+07	3.15519e+07	9.59593e+07	4.58552e+07	6.73071e+07	2.72606e+07	2.85702e+07	5.5152e+07	8.15735e+07	5.99606e+07	4.16913e+07	2.43495e+07	2.41593e+08	4.30651e+07	5.71369e+07	6.51699e+07	4.0211e+07	2.31093e+07	1.72626e+07	9.80437e+07	9.1564e+07	7.49621e+07	9.95222e+07	1.73598e+07	4.90253e+07	3.20265e+07	3.80259e+07	7.74489e+07	4.07194e+07	6.22955e+07
TRUE	High	Master Protein	Q6NZI2	Caveolae-associated protein 1 OS=Homo sapiens OX=9606 GN=CAVIN1 PE=1 SV=1	16	PTRF; CAVIN1	7.71985e+08	5.18236e+08	1.17281e+08	1.86054e+08	9.41071e+07	1.34508e+08	3.69226e+08	4.38073e+08	1.10248e+08	1.34559e+08	9.00796e+07	8.37232e+07	2.96489e+08	5.40316e+07	3.65912e+08	8.88006e+07	5.86457e+08	8.54503e+07	2.05428e+08	6.12824e+07	1.45927e+08	2.36363e+08	6.52525e+07	6.58884e+06	3.60932e+08	5.21152e+08	5.81149e+08	9.44689e+08	2.51748e+08	4.85996e+08	1.60597e+08
TRUE	High	Master Protein	P61160	Actin-related protein 2 OS=Homo sapiens OX=9606 GN=ACTR2 PE=1 SV=1	16	ACTR2	2.05151e+08	1.71433e+08	1.24152e+08	2.0082e+08	9.61823e+07	1.88735e+08	9.43349e+07	8.65147e+07	2.03302e+08	1.45968e+08	1.26763e+08	2.58544e+08	1.40048e+08	5.48223e+07	1.29908e+08	2.74114e+08	1.34769e+08	8.52469e+07	5.35122e+07	9.08761e+07	1.94477e+08	2.28368e+08	1.4539e+08	3.03493e+08	1.05633e+08	1.98279e+08	8.04915e+07	1.68487e+08	6.66408e+07	1.60909e+08	1.05179e+08
TRUE	High	Master Protein	Q9P0M6	Core histone macro-H2A.2 OS=Homo sapiens OX=9606 GN=H2AFY2 PE=1 SV=3	15	H2AFY2	8.46582e+07	2.19912e+08	6.57266e+07	1.82127e+08	7.07965e+07	5.10786e+07	1.58121e+07	3.31184e+07	5.74045e+07	6.3969e+07	3.38481e+07	2.97078e+07	7.52533e+07	1.78311e+07	8.31723e+07	4.58519e+07	7.67202e+07	2.46948e+07	8.07929e+06	1.41516e+07	6.1455e+07	8.2641e+07	9.07722e+07	5.28489e+06	3.65104e+07	5.3665e+07	2.60916e+07	3.3944e+07	8.40304e+07	4.01465e+07	3.75438e+07
TRUE	High	Master Protein	P09622	Dihydrolipoyl dehydrogenase, mitochondrial OS=Homo sapiens OX=9606 GN=DLD PE=1 SV=2	13	DLD	1.6862e+08	2.04957e+08	3.26086e+07	3.45642e+08	2.12537e+08	2.03746e+08	1.25475e+08	1.13587e+08	1.0801e+08	1.85654e+08	9.4744e+07	1.58271e+08	9.79365e+07	6.83404e+07	1.38906e+08	1.47383e+08	1.09603e+08	6.9199e+07	3.8993e+07	1.1931e+07	1.44013e+08	2.95597e+08	1.3413e+08	2.52561e+07	2.68575e+08	5.46377e+08	3.58832e+08	3.25764e+08	4.79233e+08	8.24647e+07	2.4352e+08
TRUE	High	Master Protein	O60749	Sorting nexin-2 OS=Homo sapiens OX=9606 GN=SNX2 PE=1 SV=2	16	SNX2	1.00405e+08	1.05444e+08	1.0547e+08	2.2189e+08	9.13307e+07	1.34612e+08	1.08523e+08	8.43799e+07	1.86479e+08	1.27306e+08	1.4068e+08	5.71527e+07	1.19362e+08	5.62337e+07	8.59887e+07	8.09661e+07	7.17654e+07	4.83177e+07	2.28452e+07	1.31211e+07	1.76413e+08	1.44409e+08	4.09999e+07	5.46986e+07	2.43984e+07	6.15888e+07	8.64545e+07	4.85567e+07	1.37672e+08	1.1669e+08	1.21712e+08
TRUE	High	Master Protein	P00390	Glutathione reductase, mitochondrial OS=Homo sapiens OX=9606 GN=GSR PE=1 SV=2	15	GSR	1.16501e+08	1.71506e+08	7.33945e+07	1.49365e+08	1.07937e+08	1.65561e+08	1.04806e+08	1.54765e+08	7.58607e+07	1.89747e+08	7.99799e+07	1.11508e+08	7.04969e+07	3.97706e+07	9.70099e+07	9.0146e+07	8.79293e+07	6.03637e+07	2.94746e+07	2.5445e+07	1.80702e+08	8.77112e+07	3.54177e+08	3.87929e+06	9.87442e+07	6.42222e+07	4.4815e+07	5.6237e+07	1.98375e+08	9.80177e+07	1.50755e+08
TRUE	High	Master Protein	H3BR70	Pyruvate kinase OS=Homo sapiens OX=9606 GN=PKM PE=1 SV=1	1		194320	147748	137699	113319	212631	179771	58587.9	162912	21191.9	208280	162343	154211	769910	17427.9	843939	781398	3625.06	217898	98142.1	137162	43801.3	30695.4	201337	80520	53568.5	130708	147554	137360	20570.9	160271	124467
TRUE	High	Master Protein	Q07960	Rho GTPase-activating protein 1 OS=Homo sapiens OX=9606 GN=ARHGAP1 PE=1 SV=1	17	ARHGAP1	8.52106e+07	1.61884e+08	9.79604e+07	1.67345e+08	8.46824e+07	8.51228e+07	6.45365e+07	6.63575e+07	1.72163e+08	9.47745e+07	5.8658e+07	5.66841e+07	6.7683e+07	3.30524e+07	1.10762e+08	6.36116e+07	4.89657e+07	3.67211e+07	1.61398e+07	1.22115e+07	2.06063e+08	1.13743e+08	5.56479e+06	9.82674e+06	3.05851e+07	6.34584e+07	5.74756e+07	8.2279e+07	7.96709e+07	9.64296e+07	4.08467e+07
TRUE	High	Master Protein	P11217	Glycogen phosphorylase, muscle form OS=Homo sapiens OX=9606 GN=PYGM PE=1 SV=6	13	PYGM	2.18811e+06	4.37276e+06	4.57648e+06	2.1127e+06	1.44601e+06	5.04502e+06	2.17627e+06	2.02413e+06	2.15492e+06	2.08512e+06	2.56818e+06	3.74008e+06	2.71461e+06	1.33668e+06	4.41329e+07	7.38684e+06	2.15873e+07	1.83284e+06	1.3375e+06	1.62216e+07	1.30521e+07	2.61221e+06	4.58958e+07	5.1774e+06	7.34437e+06	7.85522e+06	9.65156e+06	6.66159e+06	5.2412e+06	927228	4.23461e+06
TRUE	High	Master Protein	P50570	Dynamin-2 OS=Homo sapiens OX=9606 GN=DNM2 PE=1 SV=2	13	DNM2	1.81372e+08	2.30423e+08	1.00092e+08	1.02621e+08	1.08901e+08	1.16528e+08	1.11428e+08	6.74904e+07	1.34721e+08	1.10863e+08	1.18641e+08	4.46623e+07	7.49177e+07	2.95303e+07	5.34915e+07	2.18341e+08	4.06456e+07	5.25714e+07	1.99881e+07	1.33035e+07	8.57092e+07	9.12535e+07	1.26283e+08	1.42713e+07	5.92811e+07	1.14188e+08	4.33435e+08	5.96234e+07	1.78346e+08	8.93286e+07	1.11046e+08
TRUE	High	Master Protein	P02760	Protein AMBP OS=Homo sapiens OX=9606 GN=AMBP PE=1 SV=1	15	AMBP	4.51715e+07	2.05495e+07	5.79974e+07	5.79693e+07	4.98072e+07	2.00009e+08	6.21018e+07	4.37189e+07	4.62855e+07	5.80525e+07	8.04486e+07	5.79608e+07	1.28157e+08	3.66613e+08	3.22975e+07	2.2706e+07	8.41579e+07	1.8275e+08	2.96503e+08	1.25606e+08	6.90448e+07	2.3605e+07	3.34526e+07	5.48317e+07	6.7966e+07	4.14927e+07	8.54356e+07	8.81814e+07	3.94182e+07	1.13869e+08	5.60687e+07
TRUE	High	Master Protein	P35241	Radixin OS=Homo sapiens OX=9606 GN=RDX PE=1 SV=1	11	RDX	4.20947e+07	7.12936e+07	8.50376e+07	8.37691e+07	6.31745e+07	4.94661e+07	4.51558e+07	6.07417e+07	7.61604e+07	5.19145e+07	8.5615e+07	1.40168e+08	9.04382e+07	2.01583e+07	1.71705e+08	6.91037e+07	2.65456e+07	5.79941e+07	1.7264e+07	5.6334e+06	1.33663e+08	4.90841e+07	1.5539e+07	1.84748e+07	2.84979e+07	6.10228e+07	3.54591e+07	6.51837e+07	1.5798e+08	7.14805e+07	1.09927e+08
TRUE	High	Master Protein	P23381	Tryptophan--tRNA ligase, cytoplasmic OS=Homo sapiens OX=9606 GN=WARS PE=1 SV=2	20	WARS	6.40828e+07	6.91565e+07	4.97088e+07	9.95724e+07	1.21089e+08	8.9691e+07	1.86073e+07	2.38216e+07	4.24159e+07	6.92782e+07	7.1706e+07	4.06994e+07	5.55421e+07	5.30988e+07	8.56603e+07	8.75002e+07	5.75202e+07	7.95608e+07	3.71696e+07	3.003e+07	5.88504e+07	6.06446e+07	7.53235e+07	1.67907e+07	3.11955e+07	3.61178e+07	3.31744e+07	5.62387e+07	6.78907e+07	3.75952e+07	8.81043e+07
TRUE	High	Master Protein	P05556	Integrin beta-1 OS=Homo sapiens OX=9606 GN=ITGB1 PE=1 SV=2	17	ITGB1	1.57769e+08	1.42587e+08	8.2755e+07	1.60164e+08	7.13956e+07	1.00913e+08	8.42486e+07	9.97751e+07	8.60307e+07	1.48232e+08	9.90019e+07	7.24379e+07	8.16683e+07	5.98974e+07	8.44794e+07	1.10852e+08	1.65811e+08	4.8703e+07	3.17279e+07	3.33692e+07	1.30385e+08	1.68727e+08	1.227e+08	5.98694e+07	3.98202e+07	1.55979e+08	1.3687e+08	1.44985e+08	1.64349e+08	5.06905e+07	1.44519e+08
TRUE	High	Master Protein	P31943	Heterogeneous nuclear ribonucleoprotein H OS=Homo sapiens OX=9606 GN=HNRNPH1 PE=1 SV=4	8	HNRNPH1	5.44465e+08	4.70562e+08	1.55796e+08	5.41023e+08	2.83806e+08	4.37442e+08	2.08098e+08	2.12941e+08	2.14087e+08	4.68123e+08	2.13884e+08	9.17749e+07	1.48414e+08	7.60876e+07	3.29685e+08	3.3402e+08	1.18262e+08	1.25719e+08	5.16617e+07	3.24259e+07	4.98998e+08	4.03439e+08	1.02525e+08	2.64048e+07	2.7937e+07	1.0279e+08	1.1124e+08	6.59298e+07	1.90598e+08	1.90608e+08	1.54037e+08
TRUE	High	Master Protein	Q6FI13	Histone H2A type 2-A OS=Homo sapiens OX=9606 GN=HIST2H2AA3 PE=1 SV=3	5	HIST2H2AA4; HIST2H2AA3	3.31396e+09	4.15002e+09	2.4199e+09	5.82293e+09	3.96864e+09	3.56129e+09	2.61552e+09	1.95524e+09	2.17979e+09	4.84093e+09	1.91058e+09	2.50063e+09	4.38101e+09	1.34761e+09	2.66304e+09	2.74169e+09	3.03251e+09	1.52807e+09	2.73946e+08	5.02443e+08	1.19532e+10	2.40256e+09	9.86225e+08	1.08368e+09	1.84808e+09	6.08304e+09	1.53015e+09	5.01923e+09	4.21211e+09	4.27993e+09	4.78687e+09
TRUE	High	Master Protein	P35908	Keratin, type II cytoskeletal 2 epidermal OS=Homo sapiens OX=9606 GN=KRT2 PE=1 SV=2	15	KRT2	7.83106e+07	4.27343e+07	2.17915e+08	5.50117e+07	3.1858e+07	3.68964e+07	2.21104e+07	8.85823e+07	4.15532e+07	3.16862e+07	3.16206e+07	1.67108e+07	9.97265e+06	4.96661e+07	7.51801e+07	7.7954e+07	5.06985e+07	2.94956e+07	1.15679e+08	6.21473e+07	1.09081e+08	6.77846e+07	1.24652e+08	8.40143e+07	3.35763e+07	1.57887e+07	4.89252e+07	4.93517e+07	5.163e+07	1.08784e+07	7.98702e+07
TRUE	High	Master Protein	Q9NZN3	EH domain-containing protein 3 OS=Homo sapiens OX=9606 GN=EHD3 PE=1 SV=2	4	EHD3	466729	590027	545522	710102	904635	606508	1.14692e+06	549271	3.48656e+07	1.06966e+06	1.61522e+06	401713	849298	486413	311598	3.90725e+06	249773	1.1455e+06	2.28287e+06	1.40837e+07	432955	212873	446285	512469	239324	2.47853e+06	9.74086e+06	931817	1.34931e+06	797648	3.97314e+06
TRUE	High	Master Protein	A0A0C4DGB5	Calpastatin OS=Homo sapiens OX=9606 GN=CAST PE=1 SV=1	3	CAST	7.28056e+07	7.24226e+07	4.41448e+06	1.03631e+08	5.79147e+07	6.49126e+07	9.43285e+07	7.41579e+07	1.27582e+08	5.92242e+07	5.79821e+06	219156	631630	6.34059e+06	215915	264289	225002	458973	4.27753e+06	402419	392551	1.55109e+07	8.93732e+06	164166	1.799e+07	9.10592e+06	7.11324e+06	1.9353e+07	1.32038e+08	1.21077e+08	5.30756e+07
TRUE	High	Master Protein	Q9NY33	Dipeptidyl peptidase 3 OS=Homo sapiens OX=9606 GN=DPP3 PE=1 SV=2	15	DPP3	3.11418e+07	4.19447e+07	4.52521e+07	1.81597e+08	9.08933e+07	2.80125e+07	6.82534e+07	5.38207e+07	9.92632e+07	9.88352e+07	8.70594e+07	6.56928e+07	4.7921e+07	1.84766e+07	4.14499e+07	5.64888e+07	1.64561e+07	5.90543e+07	6.4266e+06	1.0171e+07	6.80241e+07	3.39942e+07	1.9229e+07	2.42809e+07	1.15079e+08	4.37015e+07	3.26322e+07	6.30052e+07	1.11689e+08	4.27382e+07	1.91385e+07
TRUE	High	Master Protein	O15144	Actin-related protein 2/3 complex subunit 2 OS=Homo sapiens OX=9606 GN=ARPC2 PE=1 SV=1	21	ARPC2	2.07771e+08	2.26963e+08	1.64174e+08	2.65514e+08	1.9622e+08	1.68466e+08	1.66907e+08	9.71376e+07	3.34571e+08	2.71114e+08	2.12518e+08	2.12103e+08	9.92989e+07	5.79282e+07	1.4263e+08	1.78687e+08	1.37021e+08	8.38897e+07	4.06415e+07	2.44996e+07	2.43798e+08	1.93296e+08	6.22151e+07	1.70223e+08	2.75697e+07	5.61952e+07	8.87838e+07	6.78567e+07	1.49066e+08	6.94312e+07	2.21529e+08
TRUE	High	Master Protein	O43776	Asparagine--tRNA ligase, cytoplasmic OS=Homo sapiens OX=9606 GN=NARS PE=1 SV=1	18	NARS	3.21309e+07	8.91069e+07	5.10091e+07	7.0835e+07	4.52665e+07	5.21589e+07	4.81275e+07	5.55375e+07	5.41662e+07	7.71843e+07	7.22388e+07	1.50183e+07	2.55627e+07	1.05311e+08	4.59953e+07	5.3091e+07	7.4004e+07	2.12646e+07	5.02913e+07	1.43255e+07	4.03217e+07	3.91617e+07	4.90965e+07	4.51395e+06	5.00846e+07	4.72492e+07	2.0751e+07	6.06343e+07	6.68456e+07	1.08642e+08	7.61543e+07
TRUE	High	Master Protein	P30740	Leukocyte elastase inhibitor OS=Homo sapiens OX=9606 GN=SERPINB1 PE=1 SV=1	14	SERPINB1	4.63754e+07	1.45616e+08	1.60704e+08	1.11461e+08	2.09213e+08	3.03274e+07	1.10499e+08	8.97129e+07	1.36471e+08	1.42864e+08	2.72032e+08	6.17763e+07	6.14376e+07	7.45035e+07	3.83804e+07	5.1176e+07	5.86685e+07	8.64484e+07	3.44114e+07	2.43984e+07	1.11537e+08	4.97087e+07	5.85484e+07	2.01161e+07	2.00312e+07	3.9571e+07	2.93086e+07	4.35774e+07	2.27888e+08	9.81885e+07	2.76362e+08
TRUE	High	Master Protein	Q27J81	Inverted formin-2 OS=Homo sapiens OX=9606 GN=INF2 PE=1 SV=2	17	INF2	3.16715e+07	3.3955e+07	1.34448e+07	2.81276e+07	2.20527e+07	2.08793e+07	1.29636e+07	2.71582e+07	6.95759e+06	1.18823e+07	1.17332e+07	4.73781e+06	7.22089e+06	1.05789e+07	1.09143e+07	5.1666e+06	1.27126e+07	5.51484e+06	1.27482e+07	1.36481e+07	1.51036e+07	1.69133e+07	1.38356e+07	4.88124e+06	2.03948e+07	2.62517e+07	4.44326e+06	1.15768e+07	5.07443e+07	2.59172e+07	1.75967e+06
TRUE	High	Master Protein	E7EX44	Caldesmon OS=Homo sapiens OX=9606 GN=CALD1 PE=1 SV=1	4		1.18348e+06	796798	1.06895e+07	461934	6.38141e+06	2.0966e+06	7.79616e+06	956234	389254	3.59815e+06	337610	466478	1.20056e+06	2.84372e+06	337584	857111	434661	372510	3.62377e+06	640561	395873	2.01201e+07	487166	6.11873e+07	6.55088e+06	2.44494e+06	9.44903e+06	3.5724e+06	1.45578e+07	3.17577e+07	288211
TRUE	High	Master Protein	Q9BZ29	Dedicator of cytokinesis protein 9 OS=Homo sapiens OX=9606 GN=DOCK9 PE=1 SV=2	1	DOCK9
TRUE	High	Master Protein	Q96HE7	ERO1-like protein alpha OS=Homo sapiens OX=9606 GN=ERO1A PE=1 SV=2	19	ERO1L; ERO1A	1.85913e+07	4.41411e+07	8.0032e+06	6.35707e+07	9.92447e+06	3.57497e+07	2.30802e+07	3.94663e+07	1.85128e+07	4.17e+07	6.1098e+07	7.09545e+07	1.65011e+07	4.55645e+07	6.63572e+07	3.40464e+07	3.78882e+07	8.70682e+06	1.68776e+07	5.89836e+06	4.72147e+07	8.86486e+07	5.55324e+07	1.62855e+07	1.02188e+07	9.52074e+06	1.24505e+07	2.95893e+07	4.09258e+07	6.21617e+07	8.23457e+07
TRUE	High	Master Protein	P04196	Histidine-rich glycoprotein OS=Homo sapiens OX=9606 GN=HRG PE=1 SV=1	17	HRG	3.92903e+07	4.01215e+07	4.82457e+07	4.402e+07	7.1773e+07	7.97462e+07	6.92553e+07	1.13318e+08	6.99273e+07	6.53471e+07	7.43983e+07	1.05913e+08	2.37198e+08	1.10516e+08	1.2772e+08	6.82678e+07	3.32876e+07	1.14693e+08	4.27047e+07	1.19411e+08	3.63248e+07	1.19531e+08	1.09145e+08	1.75143e+08	1.55814e+08	1.04237e+08	3.43631e+08	6.80296e+07	2.46858e+07	7.42724e+07	7.7889e+07
TRUE	High	Master Protein	Q9NQW7	Xaa-Pro aminopeptidase 1 OS=Homo sapiens OX=9606 GN=XPNPEP1 PE=1 SV=3	21	XPNPEP1	8.10757e+07	1.86632e+08	9.57739e+07	1.27677e+08	5.90183e+07	3.96934e+07	6.8958e+07	4.17987e+07	1.09208e+08	1.14262e+08	1.12085e+08	3.23798e+07	3.77971e+07	2.82505e+07	3.35217e+07	1.05319e+08	7.54662e+07	2.8663e+07	2.40769e+07	1.75532e+07	8.51129e+07	1.32051e+08	6.83253e+07	3.21208e+07	3.40227e+07	3.84469e+07	4.13335e+07	3.95833e+07	7.90482e+07	4.99668e+07	5.26022e+07
TRUE	High	Master Protein	P23284	Peptidyl-prolyl cis-trans isomerase B OS=Homo sapiens OX=9606 GN=PPIB PE=1 SV=2	17	PPIB	7.07162e+08	7.21508e+08	6.40164e+08	5.97629e+08	1.05013e+09	8.70295e+08	1.17817e+09	7.48447e+08	5.79893e+08	1.05094e+09	1.55255e+09	6.05678e+08	5.67433e+08	3.8405e+08	5.80329e+08	9.17069e+08	8.3996e+08	3.38716e+08	2.20146e+08	2.87318e+08	1.16291e+09	6.62915e+08	2.48176e+08	3.05605e+08	1.63774e+08	4.69814e+08	1.4969e+08	4.68995e+08	7.8101e+08	7.72452e+08	6.66992e+08
TRUE	High	Master Protein	O14950	Myosin regulatory light chain 12B OS=Homo sapiens OX=9606 GN=MYL12B PE=1 SV=2	6	MYL12B; MYL12A	3.36924e+08	5.5654e+08	2.36062e+08	3.40243e+08	1.41467e+08	2.68749e+08	2.90961e+08	2.4375e+08	2.7804e+08	3.39091e+08	2.84826e+08	2.58024e+08	6.07885e+08	1.72444e+08	2.16753e+08	2.95814e+08	2.85998e+08	1.79272e+08	1.58322e+08	1.06664e+08	1.97868e+08	4.5491e+08	1.68794e+08	6.5997e+07	9.8373e+07	2.50441e+08	1.79683e+08	3.83337e+08	1.23014e+08	1.88887e+08	2.40457e+08
TRUE	High	Master Protein	Q8N1G4	Leucine-rich repeat-containing protein 47 OS=Homo sapiens OX=9606 GN=LRRC47 PE=1 SV=1	18	LRRC47	5.0105e+07	1.00177e+08	4.67846e+07	5.14207e+07	7.13026e+07	4.29639e+07	4.6996e+07	3.39341e+07	6.74169e+07	4.77001e+07	4.98924e+07	2.94587e+07	5.44185e+07	1.79517e+07	1.63589e+07	9.7316e+07	3.44202e+07	3.10038e+07	1.6187e+07	4.87381e+06	4.9696e+07	4.4538e+07	4.52231e+07	8.09413e+06	1.25311e+07	2.08447e+07	2.17045e+07	1.52343e+07	5.10292e+07	2.5701e+07	3.21791e+07
TRUE	High	Master Protein	O95831	Apoptosis-inducing factor 1, mitochondrial OS=Homo sapiens OX=9606 GN=AIFM1 PE=1 SV=1	15	AIFM1	7.62816e+07	7.12895e+07	5.26573e+07	1.37539e+08	4.77322e+07	7.76299e+07	2.88315e+07	2.77169e+07	4.58801e+07	7.26886e+07	3.45344e+07	4.54503e+07	2.32452e+07	1.64152e+07	4.2068e+07	6.69986e+07	4.74659e+07	1.33038e+07	4.3816e+06	1.09198e+07	1.0392e+08	1.10242e+08	2.62992e+07	4.10937e+07	1.00126e+07	2.99661e+07	3.04618e+07	2.441e+07	6.6131e+07	3.98376e+07	7.96059e+07
TRUE	High	Master Protein	P27338	Amine oxidase [flavin-containing] B OS=Homo sapiens OX=9606 GN=MAOB PE=1 SV=3	13	MAOB	8.13624e+06	1.09595e+07	1.00327e+07	1.39166e+07	2.69283e+08	4.97954e+07	1.06124e+07	1.04159e+07	1.92281e+07	7.90467e+06	8.69924e+06	3.43848e+07	1.61454e+07	3.68997e+06	3.91562e+06	2.13006e+07	1.47107e+06	3.66398e+07	2.55369e+06	2.32198e+06	8.1754e+06	1.47892e+07	2.52307e+07	3.99786e+06	2.86484e+07	8.21883e+07	9.62276e+07	8.92886e+07	7.02696e+07	2.329e+07	4.13856e+06
TRUE	High	Master Protein	O75390	Citrate synthase, mitochondrial OS=Homo sapiens OX=9606 GN=CS PE=1 SV=2	10	CS	1.97099e+08	1.66151e+08	6.54099e+07	2.97038e+08	1.12133e+08	1.81164e+08	8.1074e+07	9.95279e+07	8.40919e+07	1.43077e+08	9.05612e+07	1.04396e+08	4.70149e+07	2.9498e+07	1.10998e+08	1.94483e+08	5.60493e+07	3.25241e+07	2.19137e+07	1.31689e+07	1.51131e+08	1.61594e+08	1.34192e+08	3.15871e+07	1.12768e+08	1.98643e+08	6.28172e+08	2.19112e+08	3.76634e+08	1.07887e+08	3.39879e+08
TRUE	High	Master Protein	P56192	Methionine--tRNA ligase, cytoplasmic OS=Homo sapiens OX=9606 GN=MARS PE=1 SV=2	22	MARS	3.04837e+07	8.12846e+07	2.05411e+07	7.86251e+07	8.24398e+07	5.03643e+07	4.29077e+07	3.19586e+07	2.57959e+07	4.62414e+07	3.56139e+07	1.13519e+08	3.83838e+07	1.84704e+07	8.01399e+07	4.81798e+07	1.37936e+08	4.2988e+07	8.16669e+06	1.63034e+07	6.16424e+07	4.89546e+07	1.92031e+07	1.07687e+07	1.22695e+08	5.09142e+07	4.72261e+07	4.25854e+07	9.76292e+07	5.15908e+07	2.12699e+07
TRUE	High	Master Protein	P61106	Ras-related protein Rab-14 OS=Homo sapiens OX=9606 GN=RAB14 PE=1 SV=4	13	RAB14	2.97557e+08	3.08902e+08	1.84825e+08	4.41526e+08	2.35254e+08	2.65833e+08	1.93401e+08	1.73591e+08	2.30403e+08	2.646e+08	2.20082e+08	2.93202e+08	2.2499e+08	8.38548e+07	3.3326e+08	4.24123e+08	1.21083e+08	1.78038e+08	2.76685e+08	1.25332e+08	3.42195e+08	3.57787e+08	1.06891e+08	2.12038e+07	4.87683e+08	4.89651e+08	3.60316e+08	3.88965e+08	2.7307e+08	2.16168e+08	2.03324e+08
TRUE	High	Master Protein	Q08378	Golgin subfamily A member 3 OS=Homo sapiens OX=9606 GN=GOLGA3 PE=1 SV=2	25	GOLGA3	5.39654e+07	8.20307e+07	1.3998e+07	8.59489e+07	2.80487e+07	3.36604e+07	3.30157e+07	3.09213e+07	5.80347e+07	3.64286e+07	1.65746e+07	2.13343e+07	1.14672e+08	1.88308e+07	3.75205e+07	3.04225e+07	9.5664e+06	1.31027e+08	8.23844e+06	9.60043e+06	1.382e+08	6.83351e+07	6.0547e+07	6.97504e+07	3.34148e+07	1.00735e+07	1.01725e+08	1.53836e+08	2.0735e+07	2.8559e+08	6.61068e+08
TRUE	High	Master Protein	Q14160	Protein scribble homolog OS=Homo sapiens OX=9606 GN=SCRIB PE=1 SV=4	15	SCRIB	4.62992e+07	2.83218e+07	6.51322e+06	2.25582e+07	8.30902e+06	9.98212e+06	6.84205e+06	8.17473e+06	1.89207e+07	7.02619e+06	2.56445e+07	3.02679e+06	1.24697e+07	1.00666e+07	4.06789e+06	8.1717e+06	3.46379e+06	9.56658e+06	1.17584e+07	5.12775e+06	1.17541e+07	1.37051e+07	7.55682e+07	1.70721e+07	2.46749e+07	1.35194e+07	1.05478e+07	4.45403e+06	1.70236e+07	4.93327e+06	8.76829e+06
TRUE	High	Master Protein	P50443	Sulfate transporter OS=Homo sapiens OX=9606 GN=SLC26A2 PE=1 SV=2	16	SLC26A2	5.52454e+06	1.89311e+08	1.51008e+08	1.8832e+08	2.59046e+06	1.79273e+08	6.85574e+06	4.95035e+07	9.14566e+07	1.37409e+08	1.85253e+08	3.11126e+07	7.86416e+07	1.29119e+07	1.5282e+08	2.96402e+07	2.49618e+07	1.22882e+07	1.29153e+07	1.80963e+07	1.77067e+08	7.39887e+07	1.64732e+08	8.1033e+06	2.16701e+07	3.37244e+07	1.67257e+07	5.47147e+06	4.60732e+08	7.53385e+07	6.34667e+07
TRUE	High	Master Protein	P14314	Glucosidase 2 subunit beta OS=Homo sapiens OX=9606 GN=PRKCSH PE=1 SV=2	1	PRKCSH	3.16784e+08	3.0145e+08	9.78255e+07	4.21623e+08	2.67023e+08	2.80132e+08	3.0816e+08	4.33335e+08	3.22797e+08	3.93701e+08	2.13481e+08	2.38705e+08	2.575e+08	9.12579e+07	2.45651e+08	4.26361e+08	2.98773e+08	1.12209e+08	5.64762e+07	3.15879e+07	3.89495e+08	2.69414e+08	3.46885e+08	1.4094e+08	8.77721e+07	1.63812e+08	9.46801e+07	1.48787e+08	2.66654e+08	2.48433e+08	2.61679e+08
TRUE	High	Master Protein	P60981	Destrin OS=Homo sapiens OX=9606 GN=DSTN PE=1 SV=3	11	DSTN	1.66401e+08	9.53076e+07	6.46513e+07	1.52519e+08	3.68201e+08	7.66193e+08	1.97283e+08	4.85712e+07	9.42694e+07	2.78301e+08	1.03274e+08	4.49407e+07	1.19462e+08	1.31192e+08	1.12059e+08	4.62896e+07	3.98654e+07	9.32476e+07	8.57022e+07	2.98398e+07	9.10158e+07	2.05754e+08	5.50579e+07	9.90656e+06	9.71922e+06	8.45972e+07	2.77466e+08	2.15613e+08	1.03376e+08	2.86685e+08	1.34815e+08
TRUE	High	Master Protein	P0DOX6	Immunoglobulin mu heavy chain OS=Homo sapiens OX=9606 PE=1 SV=1	1		211030	366843	1.84704e+06	2.20435e+06	2.90407e+06	90050.9	2.62766e+06	163005	3.07125e+06	1.38471e+06	213811	1.72485e+07	582530	1.5744e+07	780611	4.7732e+06	39667.7	1.18405e+07	8.01082e+06	2.85502e+06	117321	769305	1.5485e+07	4.83875e+06	1.4244e+07	1.25839e+07	1.7766e+07	4.10326e+06	2.05296e+06	5.07674e+06	8.99692e+06
TRUE	High	Master Protein	Q14683	Structural maintenance of chromosomes protein 1A OS=Homo sapiens OX=9606 GN=SMC1A PE=1 SV=2	27	SMC1A	8.7461e+07	4.71184e+08	5.94997e+07	1.46837e+08	9.85682e+07	8.03905e+07	7.23844e+07	6.80016e+08	5.68112e+07	6.67676e+07	3.40714e+08	1.41166e+08	2.37574e+07	1.54591e+07	2.98582e+07	4.15867e+07	4.55371e+07	2.13433e+07	1.32749e+07	4.45854e+07	6.54714e+07	4.69679e+07	2.88026e+07	7.38946e+06	3.33603e+07	7.23086e+06	2.21034e+07	2.78478e+07	6.65516e+07	1.44273e+07	4.18741e+07
TRUE	High	Master Protein	P30042	ES1 protein homolog, mitochondrial OS=Homo sapiens OX=9606 GN=C21orf33 PE=1 SV=3	10	C21orf33; LOC102724023	1.63996e+08	1.69215e+08	3.19778e+07	2.38503e+08	2.19537e+08	1.12153e+08	2.67292e+08	1.32419e+08	1.67878e+08	2.02726e+08	9.99164e+07	1.52191e+08	1.20021e+08	6.88802e+07	1.64659e+08	1.88585e+08	1.18415e+08	7.12747e+07	7.2776e+07	6.46144e+06	1.29866e+08	2.11948e+08	3.20598e+06	1.17871e+06	3.58157e+08	3.52284e+08	3.89438e+07	2.25628e+08	8.42919e+07	3.01618e+07	3.33223e+07
TRUE	High	Master Protein	Q9NSE4	Isoleucine--tRNA ligase, mitochondrial OS=Homo sapiens OX=9606 GN=IARS2 PE=1 SV=2	22	IARS2	7.8024e+07	6.51859e+07	2.53304e+07	1.19166e+08	2.24555e+07	5.2686e+07	2.09891e+07	2.13525e+07	6.41561e+07	4.19867e+07	4.09918e+07	9.64257e+07	9.56856e+07	1.13331e+07	9.08113e+07	7.0626e+07	5.72688e+07	5.17779e+07	9.4824e+06	8.65771e+06	2.47971e+08	5.26929e+07	1.65301e+08	1.34797e+07	3.39999e+07	5.85215e+07	6.281e+07	5.02834e+07	1.07597e+08	5.9896e+07	3.25644e+07
TRUE	High	Master Protein	P36873	Serine/threonine-protein phosphatase PP1-gamma catalytic subunit OS=Homo sapiens OX=9606 GN=PPP1CC PE=1 SV=1	2	PPP1CC	1.71581e+06	1.5979e+06	326546	543131	1.45005e+06	429316	1.02167e+06	455898	4.43596e+06	562642	4.2337e+06	7.48895e+06	2.56411e+06	199450	7.64152e+06	4.79025e+06	1.08278e+06	330193	54396.1	358398	1.11006e+07	2.49253e+06	4.36054e+06	179360	1.96925e+06	6.07725e+06	3.45405e+06	2.9111e+06	4.13936e+06	3.74194e+06	4.25237e+06
TRUE	High	Master Protein	Q13557	Calcium/calmodulin-dependent protein kinase type II subunit delta OS=Homo sapiens OX=9606 GN=CAMK2D PE=1 SV=3	9	CAMK2D	1.73044e+08	9.97881e+07	9.48777e+07	2.31882e+08	1.99355e+08	1.44646e+08	9.10414e+07	5.2705e+07	9.43971e+07	9.28222e+07	1.1962e+08	9.26048e+07	3.46626e+07	3.26464e+07	9.21716e+07	1.67378e+08	6.26716e+07	7.89603e+07	2.37503e+07	1.25467e+07	7.43269e+07	1.81595e+08	1.87666e+07	3.19005e+07	6.0358e+07	9.7147e+07	2.47917e+08	6.37681e+07	5.76815e+07	9.43161e+07	4.89443e+07
TRUE	High	Master Protein	Q5T5P2	Sickle tail protein homolog OS=Homo sapiens OX=9606 GN=KIAA1217 PE=1 SV=2	23	KIAA1217	5.52932e+07	5.6298e+07	1.80271e+07	6.78332e+07	1.31439e+08	2.33656e+07	7.82206e+07	5.45183e+07	8.78358e+07	1.46516e+08	3.09337e+07	2.13648e+08	1.85569e+07	1.6828e+07	7.28522e+07	2.53617e+07	3.77144e+07	1.67042e+07	9.61852e+06	9.59329e+06	1.52268e+07	6.16058e+07	3.25918e+07	3.10213e+06	4.85704e+07	1.22832e+07	5.77503e+07	1.12246e+07	7.31399e+07	3.0211e+07	4.9823e+07
TRUE	High	Master Protein	P34931	Heat shock 70 kDa protein 1-like OS=Homo sapiens OX=9606 GN=HSPA1L PE=1 SV=2	4	HSPA1L	655618	8.43252e+06	2.83027e+06	336037	4.65412e+06	5.59118e+06	5.63087e+06	9.73222e+06	753669	8.61329e+06	1.78408e+06	851555	223326	1.15534e+07	224568	2.10518e+06	2.75417e+07	334462	1.0949e+06	57783.8	2.31547e+07	1.48735e+07	2.16802e+07	2.02672e+08	2.56659e+06	3.45575e+06	804842	3.54084e+06	8.62318e+06	7.74464e+06	5.97541e+06
TRUE	High	Master Protein	Q96G03	Phosphoglucomutase-2 OS=Homo sapiens OX=9606 GN=PGM2 PE=1 SV=4	21	PGM2	5.51094e+07	8.12819e+07	8.16408e+07	1.96762e+08	5.11598e+07	6.7066e+07	4.26376e+07	3.69722e+07	9.06709e+07	8.0464e+07	4.33515e+07	7.14467e+07	8.30125e+07	2.4565e+08	9.93155e+07	7.49313e+07	5.56763e+07	3.63738e+07	1.55049e+07	2.26327e+07	6.32822e+07	1.16317e+08	2.07011e+07	6.39737e+07	1.81651e+07	3.76729e+07	3.2232e+07	3.22675e+07	6.33622e+07	4.7403e+07	1.39328e+07
TRUE	High	Master Protein	Q14008	Cytoskeleton-associated protein 5 OS=Homo sapiens OX=9606 GN=CKAP5 PE=1 SV=3	26	CKAP5	4.09271e+07	4.49853e+07	1.97443e+07	4.21555e+07	2.74366e+07	1.88415e+07	3.69142e+07	1.47122e+07	4.89291e+07	4.57468e+07	4.45721e+07	2.19589e+07	5.94472e+06	1.23461e+07	8.05823e+06	3.71068e+07	2.42133e+07	1.04519e+07	2.22462e+07	1.09047e+07	2.33665e+07	4.4214e+07	5.55942e+07	4.2391e+07	1.61336e+07	4.99298e+07	6.31082e+07	4.13196e+07	8.32857e+07	3.77401e+07	4.26333e+07
TRUE	High	Master Protein	Q96DG6	Carboxymethylenebutenolidase homolog OS=Homo sapiens OX=9606 GN=CMBL PE=1 SV=1	15	CMBL	7.52053e+07	3.49507e+08	2.74933e+08	2.40331e+08	3.4912e+08	1.5148e+08	9.89144e+08	4.98702e+08	7.27373e+08	1.3754e+08	7.50759e+07	7.63118e+07	8.34863e+07	2.45804e+07	1.30619e+08	1.03322e+08	7.82059e+07	5.35462e+07	2.00983e+07	1.48487e+07	2.59466e+08	2.79163e+08	1.24079e+08	3.05179e+08	9.17281e+07	1.06059e+08	1.37255e+08	1.52814e+08	1.97747e+08	8.91619e+07	3.2203e+08
TRUE	High	Master Protein	P13804	Electron transfer flavoprotein subunit alpha, mitochondrial OS=Homo sapiens OX=9606 GN=ETFA PE=1 SV=1	13	ETFA	1.82762e+08	1.40209e+08	2.04839e+08	1.82068e+08	1.06823e+08	2.30678e+08	5.91155e+07	6.09951e+07	8.19491e+07	1.36963e+08	9.17453e+07	5.16284e+07	4.16355e+07	9.57159e+07	6.81128e+07	1.16547e+08	1.04119e+08	3.23639e+07	1.39816e+07	5.81278e+07	1.54326e+08	1.27783e+08	5.86825e+07	5.23286e+06	6.10154e+07	1.75217e+08	5.86177e+07	1.56708e+08	2.09686e+08	1.53854e+08	4.41358e+07
TRUE	High	Master Protein	Q9UNH7	Sorting nexin-6 OS=Homo sapiens OX=9606 GN=SNX6 PE=1 SV=1	19	SNX6	6.91357e+07	8.12758e+07	4.24241e+07	1.11517e+08	4.78888e+07	7.483e+07	4.3633e+07	4.52658e+07	1.01235e+08	1.11289e+08	1.13501e+08	5.52987e+07	1.05128e+08	9.91575e+07	9.46745e+07	7.48555e+07	4.13949e+07	3.67772e+07	2.8482e+07	9.6738e+06	6.91988e+07	1.00138e+08	3.99292e+07	2.0525e+07	2.80863e+07	3.14047e+07	5.14528e+07	3.69677e+07	9.41809e+07	5.11267e+07	1.35565e+08
TRUE	High	Master Protein	Q13596	Sorting nexin-1 OS=Homo sapiens OX=9606 GN=SNX1 PE=1 SV=3	18	SNX1	1.73617e+08	2.10781e+08	1.01421e+08	2.77558e+08	8.34704e+07	2.09146e+08	6.18676e+07	1.84535e+08	1.95784e+08	1.73491e+08	1.96923e+08	1.24056e+08	9.391e+07	6.09981e+07	1.52773e+08	2.13096e+08	1.62912e+08	6.34875e+07	9.14891e+07	3.05206e+07	2.74654e+08	1.91411e+08	2.09408e+08	2.15553e+08	5.08715e+07	5.64177e+07	4.80197e+07	7.72022e+07	2.89976e+08	1.9958e+08	2.64534e+08
TRUE	High	Master Protein	Q9GZM7	Tubulointerstitial nephritis antigen-like OS=Homo sapiens OX=9606 GN=TINAGL1 PE=1 SV=1	14	TINAGL1	1.78514e+07	3.27591e+07	1.03926e+08	6.96679e+07	3.08766e+07	7.64735e+07	1.08558e+08	8.33765e+07	2.70716e+07	1.4611e+07	3.3537e+07	4.33092e+07	1.50855e+08	7.67184e+07	3.85529e+07	9.56269e+07	7.30669e+07	4.90584e+07	8.42673e+07	4.76265e+07	2.46491e+07	3.65653e+07	7.97149e+06	4.16914e+07	2.09659e+07	5.41086e+07	1.52607e+08	1.58571e+08	4.05923e+07	1.05528e+07	1.78205e+07
TRUE	High	Master Protein	O43237	Cytoplasmic dynein 1 light intermediate chain 2 OS=Homo sapiens OX=9606 GN=DYNC1LI2 PE=1 SV=1	12	DYNC1LI2	8.70787e+07	3.17381e+07	5.52585e+07	6.85368e+07	3.79617e+07	1.13429e+08	2.61967e+07	5.63095e+07	3.51959e+07	5.14634e+07	5.83063e+07	1.98034e+07	3.64528e+07	1.73353e+07	3.48293e+07	4.08849e+07	7.45329e+07	3.1186e+07	1.96483e+07	6.08282e+06	1.44678e+08	4.03039e+07	5.97118e+07	2.00034e+07	4.99429e+06	4.2132e+07	9.03283e+06	1.20057e+07	2.99942e+07	3.14492e+07	1.48257e+07
TRUE	High	Master Protein	P22087	rRNA 2'-O-methyltransferase fibrillarin OS=Homo sapiens OX=9606 GN=FBL PE=1 SV=2	3	FBL	2.56221e+08	1.81098e+08	5.72653e+07	1.73603e+08	4.86294e+07	1.14508e+08	6.30934e+07	1.44666e+08	7.61316e+07	1.05386e+08	7.82456e+07	2.30465e+07	5.24255e+07	2.13005e+07	1.00163e+08	2.06854e+08	6.62414e+07	2.1417e+07	1.68829e+07	1.00876e+07	3.15656e+08	8.88997e+07	4.62128e+07	1.94542e+07	1.61474e+07	4.25277e+07	2.45595e+07	3.39397e+07	1.4305e+08	6.28207e+07	9.17969e+07
TRUE	High	Master Protein	O00567	Nucleolar protein 56 OS=Homo sapiens OX=9606 GN=NOP56 PE=1 SV=4	19	NOP56	7.19818e+07	7.26382e+07	3.07735e+07	7.91002e+07	2.52617e+07	7.77155e+07	3.66337e+07	3.29455e+07	3.24938e+07	4.98075e+07	2.58649e+07	8.36884e+07	2.04993e+07	1.25261e+07	3.97162e+07	1.76846e+08	3.90971e+07	1.66664e+07	7.6201e+06	3.44802e+07	1.35335e+08	3.13897e+07	3.08393e+07	4.82885e+07	4.73939e+06	1.81502e+07	1.64978e+07	8.8746e+06	4.87582e+07	2.38776e+07	2.00982e+07
TRUE	High	Master Protein	A0A087WWA5	Tenascin-X OS=Homo sapiens OX=9606 GN=TNXB PE=1 SV=1	11		24234.5	415990	126024	109861	147554	609077	44941.1	1.66461e+06	2.17463e+06	50262	5.01789e+06	181069	2.94916e+06	1.57579e+06	61125.5	46187.3	47278	173923	130436	90383.4	114454	1.906e+06	19377.8	89242.9	208783	161570	187243	209421	101714	101826	197000
TRUE	High	Master Protein	Q9Y5S2	Serine/threonine-protein kinase MRCK beta OS=Homo sapiens OX=9606 GN=CDC42BPB PE=1 SV=2	14	CDC42BPB	3.36445e+07	2.55072e+07	1.1008e+07	1.99904e+07	1.45817e+07	1.98796e+07	1.53446e+07	6.20433e+06	2.86315e+07	3.22741e+07	2.06895e+07	1.07965e+08	1.02805e+07	3.15746e+06	2.73994e+07	5.11251e+07	1.1536e+07	5.44962e+07	4.3298e+07	4.81282e+06	9.69048e+07	1.235e+07	2.3804e+07	6.61918e+06	2.65077e+06	4.69451e+06	1.29346e+07	3.9521e+06	6.63181e+06	1.22947e+07	1.00338e+07
TRUE	High	Master Protein	P54578	Ubiquitin carboxyl-terminal hydrolase 14 OS=Homo sapiens OX=9606 GN=USP14 PE=1 SV=3	17	USP14	4.51952e+07	1.22503e+08	8.71424e+07	1.34686e+08	1.67979e+08	1.07325e+08	1.53058e+08	1.26156e+08	9.84922e+07	1.00727e+08	1.21849e+08	5.95404e+07	5.22658e+07	2.69363e+07	5.69141e+07	9.10864e+07	1.09046e+08	4.38832e+07	2.64347e+07	3.22857e+07	1.54921e+08	1.49791e+08	9.54569e+07	3.56632e+08	5.12476e+07	9.31672e+07	6.03067e+07	9.22249e+07	1.43313e+08	9.00872e+07	1.97792e+08
TRUE	High	Master Protein	P12236	ADP/ATP translocase 3 OS=Homo sapiens OX=9606 GN=SLC25A6 PE=1 SV=4	2	SLC25A6	3.12532e+08	3.7666e+08	1.58204e+08	6.52883e+08	2.70127e+08	4.8842e+08	2.02201e+08	1.59392e+08	2.20429e+08	4.331e+08	1.4966e+08	3.44045e+08	2.3945e+08	9.7002e+07	3.14599e+08	4.75089e+08	1.83556e+08	1.61513e+08	4.01494e+07	7.23011e+08	4.43984e+08	4.73475e+08	4.72919e+08	3.3439e+08	2.77461e+08	8.21185e+08	1.49259e+09	5.9918e+08	7.11329e+08	2.35392e+08	6.82338e+08
TRUE	High	Master Protein	Q9Y305	Acyl-coenzyme A thioesterase 9, mitochondrial OS=Homo sapiens OX=9606 GN=ACOT9 PE=1 SV=2	20	ACOT9	8.81667e+07	3.59729e+07	1.7722e+07	7.71411e+07	4.98136e+07	8.28539e+07	4.94739e+07	3.10329e+07	4.03249e+07	5.1148e+07	5.92801e+07	1.95115e+07	2.2755e+07	1.2356e+07	4.09258e+07	3.182e+07	1.26434e+07	1.65861e+07	1.72366e+07	1.27325e+07	2.73554e+07	5.29418e+07	8.66954e+07	1.84898e+08	3.17843e+07	4.55933e+07	5.94975e+07	4.55762e+07	1.01798e+08	4.6263e+07	5.36273e+07
TRUE	High	Master Protein	O75874	Isocitrate dehydrogenase [NADP] cytoplasmic OS=Homo sapiens OX=9606 GN=IDH1 PE=1 SV=2	15	IDH1	1.55655e+08	2.07429e+08	2.02418e+08	2.63666e+08	1.69327e+08	1.78834e+08	1.08575e+08	6.54011e+07	3.32156e+08	2.18753e+08	1.44364e+08	2.11496e+08	1.36109e+08	1.08731e+08	1.669e+08	2.50966e+08	1.4551e+08	8.36102e+07	4.87418e+07	2.76258e+07	1.634e+08	1.77032e+08	7.65664e+07	1.70029e+07	1.9372e+07	6.86189e+07	2.78254e+07	9.1075e+07	1.75267e+08	1.44502e+08	1.99081e+08
TRUE	High	Master Protein	P08183	Multidrug resistance protein 1 OS=Homo sapiens OX=9606 GN=ABCB1 PE=1 SV=3	22	ABCB1	2.85262e+07	2.0588e+08	2.06813e+07	2.39196e+07	1.8038e+07	8.47802e+06	3.93526e+07	3.36896e+07	8.46149e+07	1.45472e+07	4.6802e+07	2.89438e+07	1.31987e+07	9.97647e+06	4.90809e+07	2.79749e+07	1.92564e+07	1.17341e+07	8.3307e+06	7.64747e+06	2.28242e+07	4.53867e+07	4.88505e+07	8.97388e+07	1.19385e+07	2.16145e+07	1.5149e+07	1.77985e+07	1.82371e+08	1.7254e+07	3.16169e+07
TRUE	High	Master Protein	P08865	40S ribosomal protein SA OS=Homo sapiens OX=9606 GN=RPSA PE=1 SV=4	13	RPSA	2.62176e+08	2.348e+08	1.15472e+08	4.82228e+08	1.09192e+08	2.26525e+08	1.11687e+08	1.12416e+08	2.25368e+08	3.29996e+08	1.41126e+08	1.10196e+08	1.72911e+08	4.78542e+07	1.86522e+08	1.71036e+08	4.91582e+07	6.15762e+07	4.14501e+07	6.65742e+08	3.3247e+08	1.13294e+08	2.91547e+07	3.30494e+07	7.10411e+07	1.51797e+08	6.61756e+07	1.37105e+08	3.63917e+08	2.41446e+08	3.353e+08
TRUE	High	Master Protein	Q15113	Procollagen C-endopeptidase enhancer 1 OS=Homo sapiens OX=9606 GN=PCOLCE PE=1 SV=2	13	PCOLCE	1.75034e+08	8.71375e+07	4.97558e+07	8.18326e+07	2.38469e+07	4.33995e+07	7.28771e+07	1.18931e+08	6.24538e+07	4.21931e+07	5.65437e+07	7.73296e+07	3.88254e+08	1.47475e+08	4.50868e+07	4.12356e+07	2.26309e+07	1.63218e+08	6.63292e+07	1.06912e+08	6.81168e+07	2.70268e+07	3.17855e+07	5.3512e+06	2.54917e+07	2.69845e+07	2.54609e+07	2.01565e+07	2.75229e+07	6.06827e+07	9.32142e+06
TRUE	High	Master Protein	P41252	Isoleucine--tRNA ligase, cytoplasmic OS=Homo sapiens OX=9606 GN=IARS PE=1 SV=2	21	IARS	6.20504e+07	5.94493e+07	4.71778e+07	9.16601e+07	3.50637e+07	5.32121e+07	3.83232e+07	4.21227e+07	3.92362e+07	6.25769e+07	4.7456e+07	3.59777e+07	3.02279e+07	4.73268e+07	5.01595e+07	1.12735e+08	8.00291e+07	1.84656e+07	4.09213e+07	6.47818e+06	1.49093e+08	1.1903e+08	9.9304e+07	7.18747e+07	1.5395e+07	2.67712e+07	2.86629e+07	2.25681e+07	8.7827e+07	4.57389e+07	6.21731e+07
TRUE	High	Master Protein	Q9ULR3	Protein phosphatase 1H OS=Homo sapiens OX=9606 GN=PPM1H PE=1 SV=2	14	PPM1H	4.2117e+07	2.0039e+07	1.03987e+07	3.65788e+07	9.23915e+06	8.22689e+07	1.16563e+07	5.07431e+07	2.82305e+07	6.1357e+07	1.32895e+07	1.63177e+07	8.14483e+06	3.32151e+06	3.10843e+07	2.2445e+07	7.82724e+06	1.10859e+07	1.02409e+07	3.98543e+06	4.15333e+07	2.10682e+07	3.25901e+07	5.72181e+08	3.04023e+07	6.96634e+07	3.4776e+07	6.66159e+07	5.70129e+07	6.23512e+07	4.20102e+07
TRUE	High	Master Protein	P09110	3-ketoacyl-CoA thiolase, peroxisomal OS=Homo sapiens OX=9606 GN=ACAA1 PE=1 SV=2	13	ACAA1	9.1943e+07	7.74167e+07	8.34002e+07	6.18013e+07	2.4901e+09	1.25207e+08	4.89377e+07	4.55599e+07	9.50273e+07	1.04543e+08	9.94656e+07	2.90518e+07	8.55631e+06	1.36178e+07	1.77415e+07	1.71038e+07	6.11844e+07	1.56097e+07	8.00162e+06	6.72124e+06	4.63187e+07	6.35915e+07	3.70223e+07	7.37318e+06	7.57703e+06	1.96563e+07	2.01723e+07	2.88048e+07	1.85578e+07	3.20333e+07	1.92182e+07
TRUE	High	Master Protein	Q15365	Poly(rC)-binding protein 1 OS=Homo sapiens OX=9606 GN=PCBP1 PE=1 SV=2	10	PCBP1	3.43942e+08	2.75107e+08	1.96e+08	4.72014e+08	1.34496e+08	1.76012e+08	9.66473e+07	1.4342e+08	2.73094e+08	2.18257e+08	1.97171e+08	9.45887e+07	1.39488e+08	4.39365e+07	2.74187e+08	2.04799e+08	7.70906e+07	9.23889e+07	2.5949e+07	1.72874e+08	4.08652e+08	2.26532e+08	1.74242e+08	1.58727e+07	4.64783e+07	1.16969e+08	7.18124e+07	5.81992e+07	2.68773e+08	2.16904e+08	2.96847e+08
TRUE	High	Master Protein	Q12904	Aminoacyl tRNA synthase complex-interacting multifunctional protein 1 OS=Homo sapiens OX=9606 GN=AIMP1 PE=1 SV=2	14	AIMP1	1.02437e+08	4.7534e+07	2.5576e+07	7.88371e+07	4.00092e+07	4.25387e+07	2.99472e+07	6.18518e+07	4.74136e+07	6.67786e+07	3.35927e+07	2.27995e+07	2.54793e+07	1.80719e+07	3.44384e+07	4.53968e+07	5.20842e+07	2.16656e+07	1.89618e+07	5.57159e+06	9.80133e+07	9.17383e+07	3.2531e+07	6.08092e+06	1.05898e+07	2.24835e+07	3.61671e+07	1.44385e+07	4.88951e+07	5.23758e+07	6.27347e+07
TRUE	High	Master Protein	P17252	Protein kinase C alpha type OS=Homo sapiens OX=9606 GN=PRKCA PE=1 SV=4	12	PRKCA	1.39619e+08	5.46371e+07	1.86768e+07	3.39646e+07	3.67367e+07	4.39143e+07	3.81822e+07	7.78108e+07	3.64524e+07	2.94166e+07	1.83924e+07	4.25335e+08	4.29501e+07	5.88714e+06	2.2954e+08	3.70958e+07	1.15121e+07	1.73083e+07	8.23389e+06	8.34617e+07	1.24268e+08	1.33071e+07	4.48404e+07	2.04732e+07	3.72233e+06	1.12182e+07	9.89479e+06	1.30023e+07	6.19721e+06	1.0256e+07	6.93098e+06
TRUE	High	Master Protein	P41091	Eukaryotic translation initiation factor 2 subunit 3 OS=Homo sapiens OX=9606 GN=EIF2S3 PE=1 SV=3	16	EIF2S3	1.04522e+08	8.88323e+07	3.2433e+07	1.70948e+08	4.70605e+07	1.57818e+08	4.51641e+07	3.9411e+07	8.04797e+07	1.16984e+08	6.34254e+07	8.61606e+07	4.65792e+07	6.62184e+07	9.36865e+07	1.11525e+08	9.70387e+07	2.89157e+07	8.4583e+07	1.68582e+07	1.01445e+08	1.21114e+08	6.92485e+07	5.62347e+06	2.30987e+07	5.19246e+07	3.26443e+07	7.5086e+07	1.05998e+08	5.70675e+07	7.52187e+07
TRUE	High	Master Protein	Q13162	Peroxiredoxin-4 OS=Homo sapiens OX=9606 GN=PRDX4 PE=1 SV=1	10	PRDX4	9.42131e+07	4.49436e+07	3.47094e+07	9.03076e+07	3.80829e+07	2.25685e+08	8.6498e+07	1.18281e+08	4.21494e+07	1.67474e+08	4.66784e+07	6.59344e+07	6.37249e+07	3.14163e+07	6.14106e+07	7.47252e+07	5.64154e+07	3.84969e+07	2.40981e+07	1.99845e+07	5.89973e+07	6.84359e+07	1.85034e+07	5.03067e+06	2.9052e+07	5.33103e+07	2.57722e+07	8.3685e+07	9.74293e+07	8.32119e+07	1.45404e+08
TRUE	High	Master Protein	P45880	Voltage-dependent anion-selective channel protein 2 OS=Homo sapiens OX=9606 GN=VDAC2 PE=1 SV=2	14	VDAC2	3.32158e+08	3.5894e+08	1.18552e+08	3.96337e+08	3.58836e+08	3.43109e+08	2.84942e+08	2.08636e+08	1.30813e+08	3.90637e+08	2.49956e+08	1.78116e+08	1.61388e+08	2.98195e+07	1.70805e+08	3.88716e+08	2.1061e+08	8.79966e+07	4.57631e+07	3.10437e+07	1.57599e+08	3.42619e+08	2.55359e+08	1.03338e+08	1.30439e+08	3.16835e+08	3.49504e+08	2.70114e+08	2.55681e+08	1.68569e+08	3.47629e+08
TRUE	High	Master Protein	Q9NVS9	Pyridoxine-5'-phosphate oxidase OS=Homo sapiens OX=9606 GN=PNPO PE=1 SV=1	13	PNPO	9.69745e+07	4.59329e+07	9.77307e+07	7.02219e+07	2.63536e+07	8.39949e+07	1.70494e+07	2.36036e+07	5.67507e+07	4.43572e+07	5.99039e+07	4.14824e+07	3.35913e+07	7.13781e+06	6.67094e+07	4.10513e+07	2.31325e+07	9.33199e+06	5.15816e+06	1.58087e+07	6.27033e+07	2.25637e+07	4.32682e+07	2.81616e+07	1.28199e+07	7.40714e+06	1.43095e+07	7.98038e+06	5.82126e+07	5.47821e+07	2.06852e+07
TRUE	High	Master Protein	P30084	Enoyl-CoA hydratase, mitochondrial OS=Homo sapiens OX=9606 GN=ECHS1 PE=1 SV=4	13	ECHS1	1.46752e+08	2.46787e+08	8.2716e+07	2.40431e+08	1.81934e+08	1.16827e+08	2.05279e+08	1.45256e+08	1.09428e+08	1.42441e+08	1.01375e+08	6.11054e+07	1.28659e+08	2.66586e+07	6.37898e+07	1.313e+08	9.25355e+07	4.24819e+07	1.03773e+07	2.61878e+07	9.50302e+07	1.87772e+08	2.68185e+07	1.19891e+08	7.01317e+07	1.84994e+08	1.51724e+08	1.59737e+08	2.7133e+08	9.28301e+07	1.01324e+08
TRUE	High	Master Protein	P02763	Alpha-1-acid glycoprotein 1 OS=Homo sapiens OX=9606 GN=ORM1 PE=1 SV=1	8	ORM1	5.33279e+08	1.97109e+08	2.08195e+08	2.28136e+08	4.12511e+08	2.2382e+08	4.10118e+08	8.03972e+08	3.37735e+08	1.93514e+08	8.21075e+08	6.55775e+08	4.23727e+08	3.1106e+09	2.63783e+08	2.39368e+08	2.08594e+08	1.2852e+09	1.70776e+09	6.2623e+08	1.34996e+08	3.23899e+08	9.27649e+08	3.72273e+08	6.50536e+08	3.45422e+08	1.71508e+09	1.43399e+09	5.01655e+08	9.67255e+08	5.94063e+08
TRUE	High	Master Protein	Q9HCC0	Methylcrotonoyl-CoA carboxylase beta chain, mitochondrial OS=Homo sapiens OX=9606 GN=MCCC2 PE=1 SV=1	18	MCCC2	2.38686e+07	1.8163e+07	1.30681e+07	4.82372e+07	1.90373e+07	2.79177e+07	1.30819e+07	1.07821e+07	1.37289e+07	1.78089e+07	1.24608e+07	1.51254e+07	1.30601e+07	5.88193e+06	1.33301e+07	2.54066e+07	1.68342e+07	5.9181e+06	1.04957e+07	4.22398e+06	5.46238e+07	1.50509e+07	8.75412e+06	1.29734e+07	5.71926e+06	1.4319e+07	4.27224e+06	8.67072e+06	2.12074e+07	5.50231e+06	2.3841e+06
TRUE	High	Master Protein	P10643	Complement component C7 OS=Homo sapiens OX=9606 GN=C7 PE=1 SV=2	18	C7	5.20417e+07	1.91284e+07	8.36263e+06	4.17657e+07	2.21537e+07	2.5018e+07	2.49762e+07	3.83672e+07	2.2434e+07	3.15121e+07	5.02917e+07	4.60129e+07	3.77161e+07	4.19881e+07	1.14733e+08	1.36731e+07	9.49399e+06	6.61961e+07	4.63355e+07	8.90428e+07	4.0038e+07	1.92573e+07	4.70689e+07	6.38157e+06	2.34637e+06	2.66366e+06	1.07292e+07	7.81023e+06	4.52358e+06	4.35628e+06	3.16443e+06
TRUE	High	Master Protein	Q9HC35	Echinoderm microtubule-associated protein-like 4 OS=Homo sapiens OX=9606 GN=EML4 PE=1 SV=3	22	EML4	6.35392e+07	1.30919e+08	6.7382e+07	1.39063e+08	2.91254e+07	1.27467e+08	2.22073e+07	5.274e+08	7.14987e+07	3.6179e+07	4.84663e+07	6.81259e+07	3.40671e+07	6.7305e+06	5.71908e+07	3.91367e+07	3.67554e+07	1.82853e+07	4.99576e+06	1.9936e+07	1.66712e+08	1.87859e+08	1.06499e+08	5.88814e+07	9.10493e+06	1.69621e+07	2.69617e+07	2.33585e+07	4.70893e+07	2.68824e+07	7.55586e+07
TRUE	High	Master Protein	Q9H3P7	Golgi resident protein GCP60 OS=Homo sapiens OX=9606 GN=ACBD3 PE=1 SV=4	13	ACBD3	6.11542e+07	5.80905e+07	2.01253e+07	8.24038e+07	1.55842e+07	2.86473e+07	2.06574e+07	1.12378e+07	2.74699e+07	4.07506e+07	3.31275e+07	1.61606e+08	2.6921e+07	8.36216e+06	5.23572e+07	7.60792e+07	1.54604e+07	7.64164e+06	1.1593e+07	3.78595e+06	1.20427e+08	7.49303e+07	7.23759e+07	2.17044e+07	3.29247e+06	3.05018e+06	2.05407e+06	2.87081e+06	1.31538e+07	1.05055e+07	1.64517e+07
TRUE	High	Master Protein	Q5JWF2	Guanine nucleotide-binding protein G(s) subunit alpha isoforms XLas OS=Homo sapiens OX=9606 GN=GNAS PE=1 SV=2	15	GNAS	1.37237e+08	9.11772e+07	9.9193e+07	1.32708e+08	1.16116e+08	1.09005e+08	1.38059e+08	9.67529e+07	1.1156e+08	1.19291e+08	1.41589e+08	4.74825e+07	7.54688e+07	2.65055e+07	9.89709e+07	1.1316e+08	6.03421e+07	1.07321e+08	2.49897e+07	1.71275e+07	1.10753e+08	1.33461e+08	1.08519e+08	2.54734e+07	1.634e+07	5.62723e+07	2.77783e+07	4.40801e+07	1.20637e+08	5.86994e+07	5.96889e+07
TRUE	High	Master Protein	P34897	Serine hydroxymethyltransferase, mitochondrial OS=Homo sapiens OX=9606 GN=SHMT2 PE=1 SV=3	19	SHMT2	1.39373e+08	1.05878e+08	5.2098e+07	1.38222e+08	4.71524e+07	4.54236e+07	3.78851e+07	6.19314e+07	3.67502e+07	8.45192e+07	6.30201e+07	1.00812e+08	5.98195e+07	5.30076e+07	2.29466e+08	2.62907e+08	6.08277e+07	5.22131e+07	2.30808e+07	5.2841e+06	1.56812e+08	6.74207e+07	4.20261e+08	1.45374e+07	4.23115e+07	8.63472e+07	3.90629e+07	7.99034e+07	1.49004e+08	1.0275e+08	7.33709e+07
TRUE	High	Master Protein	P00533	Epidermal growth factor receptor OS=Homo sapiens OX=9606 GN=EGFR PE=1 SV=2	17	EGFR	7.43172e+07	9.31135e+07	6.49938e+07	6.93148e+07	1.4458e+08	2.6218e+07	1.36053e+08	9.91434e+07	6.53522e+07	6.49415e+07	8.86301e+07	3.47524e+07	2.87128e+07	1.21903e+07	6.19053e+07	2.8823e+07	7.827e+07	1.21548e+07	6.89748e+07	7.81457e+07	1.46091e+08	1.11118e+08	1.77888e+08	4.75801e+07	2.51963e+07	3.75261e+07	5.74182e+06	3.60926e+07	2.65032e+07	1.73813e+07	1.71419e+07
TRUE	High	Master Protein	P04632	Calpain small subunit 1 OS=Homo sapiens OX=9606 GN=CAPNS1 PE=1 SV=1	11	CAPNS1	4.7226e+08	2.78665e+08	1.36823e+08	3.93146e+08	3.42831e+08	2.17235e+08	2.08265e+08	1.50112e+08	3.79474e+08	2.39773e+08	2.63136e+08	2.03173e+08	2.25193e+08	7.08502e+07	5.67852e+08	1.43741e+08	2.61852e+08	1.53136e+08	4.73983e+07	5.64839e+07	3.4479e+08	3.79758e+08	1.16133e+08	2.27881e+07	2.23638e+07	5.45794e+07	2.79863e+07	4.42772e+07	2.0338e+08	1.41771e+08	1.77296e+08
TRUE	High	Master Protein	P05388	60S acidic ribosomal protein P0 OS=Homo sapiens OX=9606 GN=RPLP0 PE=1 SV=1	14	RPLP0	2.68157e+08	277038129	1.47056e+08	4.36456e+08	1.12448e+08	2.63145e+08	1.4285e+08	1.68513e+08	1.99988e+08	3.03178e+08	2.38804e+08	1.92924e+08	1.26527e+08	6.59607e+07	2.6859e+08	2.47196e+08	8.31812e+07	8.66832e+07	4.47707e+07	2.59021e+07	3.31898e+08	2.60613e+08	1.1712e+08	3.78352e+07	5.09147e+07	7.77696e+07	8.45819e+07	7.51004e+07	2.44525e+08	1.30503e+08	2.57552e+08
TRUE	High	Master Protein	P15121	Aldose reductase OS=Homo sapiens OX=9606 GN=AKR1B1 PE=1 SV=3	14	AKR1B1	1.32426e+08	1.72128e+08	1.07294e+08	2.76672e+08	9.43601e+07	1.54269e+08	6.86507e+07	4.92089e+07	1.82142e+08	1.30071e+08	1.08166e+08	1.88802e+08	7.43988e+07	5.55587e+07	1.54241e+08	1.53086e+08	1.01117e+08	5.78314e+07	1.91794e+07	1.85468e+07	1.17005e+08	1.80675e+08	8.45543e+07	1.82559e+07	3.08013e+07	7.98481e+07	1.17594e+08	1.14446e+08	3.15636e+08	1.51206e+08	4.66062e+08
TRUE	High	Master Protein	P02786	Transferrin receptor protein 1 OS=Homo sapiens OX=9606 GN=TFRC PE=1 SV=2	20	TFRC	1.39154e+08	3.74003e+07	1.39949e+07	7.82794e+07	1.943e+07	1.57089e+07	2.6369e+07	4.66915e+07	1.89392e+07	4.07451e+07	5.79535e+07	1.96276e+07	8.75104e+06	9.53025e+07	2.07703e+08	2.18472e+07	2.11583e+07	8.09028e+06	1.204e+07	1.62316e+07	2.25547e+08	6.89978e+07	1.70301e+08	2.33853e+07	1.43137e+08	2.03961e+08	3.01522e+08	3.79937e+08	4.50364e+08	2.08636e+08	4.54663e+08
TRUE	High	Master Protein	Q15293	Reticulocalbin-1 OS=Homo sapiens OX=9606 GN=RCN1 PE=1 SV=1	14	RCN1	7.97217e+07	6.06405e+07	4.44879e+07	1.42541e+08	4.62879e+07	1.05629e+08	2.09461e+08	2.77547e+08	8.93613e+07	1.03022e+08	6.68793e+07	4.71968e+07	6.36556e+07	5.29096e+07	1.12318e+08	8.99406e+07	4.73226e+07	3.4227e+07	2.4147e+07	1.41806e+07	1.31979e+08	7.62882e+07	7.81005e+07	7.5308e+07	1.33345e+07	5.17372e+07	8.27198e+06	5.93739e+07	6.05645e+07	6.09125e+07	2.34053e+07
TRUE	High	Master Protein	Q12923	Tyrosine-protein phosphatase non-receptor type 13 OS=Homo sapiens OX=9606 GN=PTPN13 PE=1 SV=2	22	PTPN13	4.12468e+07	2.8767e+07	1.54889e+07	9.75014e+06	2.03091e+07	4.04784e+07	8.34954e+06	9.39686e+06	5.14184e+07	8.8818e+06	2.29028e+07	1.45031e+07	4.99744e+06	2.8215e+07	1.59924e+07	1.63096e+07	3.28038e+07	7.17429e+06	1.08738e+07	3.42671e+07	2.28299e+07	1.30916e+07	1.97318e+07	4.11571e+06	1.04698e+07	1.6341e+07	7.16687e+06	2.00115e+07	3.78232e+07	1.98638e+07	1.00494e+07
TRUE	High	Master Protein	P07339	Cathepsin D OS=Homo sapiens OX=9606 GN=CTSD PE=1 SV=1	5	CTSD	3.35614e+08	1.82726e+08	1.73291e+08	2.62053e+08	2.65841e+08	2.0171e+08	1.89449e+08	1.66996e+08	1.71542e+08	2.14486e+08	1.69441e+08	1.06984e+09	2.8631e+08	4.43636e+08	2.78577e+08	1.59697e+08	1.7165e+08	1.40673e+08	1.41654e+08	2.5213e+07	1.47692e+08	1.2936e+08	3.80694e+08	1.45364e+08	1.97166e+08	2.96889e+08	2.98214e+08	5.79246e+08	4.61577e+08	1.84446e+08	1.58698e+08
TRUE	High	Master Protein	Q06278	Aldehyde oxidase OS=Homo sapiens OX=9606 GN=AOX1 PE=1 SV=2	19	AOX1	4.99682e+07	8.21054e+06	6.5149e+06	1.64705e+07	6.44736e+06	5.6054e+06	9.63155e+06	1.05217e+07	2.77308e+07	8.13589e+06	2.26333e+07	7.29801e+07	1.33367e+07	8.07237e+06	2.7695e+07	6.48025e+07	3.18843e+07	6.60416e+06	4.03618e+06	3.69144e+06	4.27551e+07	5.37167e+06	8.13421e+06	9.47717e+06	5.41338e+06	5.53237e+06	5.99182e+06	6.29736e+06	4.80908e+06	5.24564e+06	1.31638e+07
TRUE	High	Master Protein	E7EVY3	Calpastatin OS=Homo sapiens OX=9606 GN=CAST PE=1 SV=1	3		105606	194813	2.32714e+06	1.93136e+06	888933	66800.2	121079	865164	1.52771e+06	811450	1.68144e+06	1.67895e+06	699655	1.22138e+06	1.08098e+06	1.63565e+06	1.2226e+06	78750.6	68553.1	78652.7	54570	1.97469e+06	1.06399e+06	131659	118509	187738	32887.6	116378	20312	110542	182112
TRUE	High	Master Protein	O94813	Slit homolog 2 protein OS=Homo sapiens OX=9606 GN=SLIT2 PE=1 SV=1	19	SLIT2	3.09245e+06	3.43759e+06	4.11101e+06	4.04163e+06	2.90374e+06	4.73141e+06	7.21431e+06	4.00856e+06	6.95539e+06	3.88514e+06	1.59507e+08	2.36244e+06	5.79382e+06	2.72478e+06	5.23533e+06	6.66663e+06	2.27438e+07	3.18076e+06	8.28883e+06	3.70095e+06	3.97047e+06	3.428e+06	1.95105e+06	2.79128e+07	5.71731e+06	4.95209e+06	6.83856e+06	4.9663e+06	4.79333e+06	3.73218e+06	2.43085e+08
TRUE	High	Master Protein	Q92878	DNA repair protein RAD50 OS=Homo sapiens OX=9606 GN=RAD50 PE=1 SV=1	22	RAD50	4.53366e+07	4.79542e+07	2.6092e+07	7.49689e+07	2.02084e+07	3.74124e+07	3.17256e+07	2.69791e+07	3.62244e+07	7.55333e+07	6.1311e+07	5.85449e+07	2.461e+07	1.20637e+07	4.78398e+07	9.89596e+07	3.31945e+07	1.69569e+07	1.31993e+07	1.57415e+07	1.4693e+08	4.87406e+07	1.48478e+08	6.37146e+07	3.34527e+07	2.36246e+07	1.04544e+07	3.14998e+07	6.97521e+07	4.01565e+07	1.22403e+07
TRUE	High	Master Protein	Q9Y5X3	Sorting nexin-5 OS=Homo sapiens OX=9606 GN=SNX5 PE=1 SV=1	18	SNX5	4.87469e+07	6.14332e+07	4.9421e+07	1.27934e+08	2.48065e+07	8.75989e+07	5.1395e+07	4.35677e+07	4.71995e+07	7.57473e+07	4.82091e+07	3.39588e+07	3.0555e+07	3.5281e+07	3.03245e+07	5.70731e+07	7.12301e+08	2.25986e+07	4.11721e+07	1.37877e+07	6.86521e+07	2.13608e+07	5.96377e+07	2.03115e+07	4.72178e+06	3.21482e+07	3.60694e+07	1.37939e+07	6.13949e+07	2.13677e+07	5.7403e+07
TRUE	High	Master Protein	P42167	Lamina-associated polypeptide 2, isoforms beta/gamma OS=Homo sapiens OX=9606 GN=TMPO PE=1 SV=2	3	TMPO	2.48723e+07	3.3394e+07	4.80058e+06	6.09425e+07	2.34895e+07	3.96535e+07	1.46672e+07	1.67781e+07	2.0286e+07	4.87181e+07	2.14695e+07	8.77505e+06	2.46138e+07	4.0499e+06	1.50304e+07	1.58808e+07	8.42066e+06	6.56874e+06	461528	1.87451e+06	1.8929e+07	4.33829e+07	1.1158e+07	1.36114e+06	9.00338e+06	1.87682e+07	1.37541e+06	2.00349e+07	4.38764e+07	1.45893e+07	6.05696e+06
TRUE	High	Master Protein	P19827	Inter-alpha-trypsin inhibitor heavy chain H1 OS=Homo sapiens OX=9606 GN=ITIH1 PE=1 SV=3	14	ITIH1	2.05889e+07	3.62023e+07	1.09914e+08	1.59649e+07	8.86095e+07	7.20762e+07	3.42254e+07	3.13089e+07	2.94395e+07	2.29538e+07	4.28791e+07	4.39894e+07	7.30501e+07	7.70187e+07	4.04615e+07	5.75315e+07	7.63374e+07	2.35587e+08	7.24743e+07	1.47818e+08	4.60488e+07	3.77476e+07	1.96285e+08	1.84124e+07	3.11438e+07	2.81977e+07	4.67276e+07	5.32528e+07	7.45315e+07	4.6324e+07	2.17918e+07
TRUE	High	Master Protein	Q16851	UTP--glucose-1-phosphate uridylyltransferase OS=Homo sapiens OX=9606 GN=UGP2 PE=1 SV=5	17	UGP2	1.13018e+08	9.61007e+07	9.83407e+07	1.25485e+08	1.68709e+08	8.82207e+07	1.50787e+08	8.63379e+07	1.28353e+08	9.3186e+07	1.48271e+08	1.43561e+08	8.42156e+07	5.39928e+07	1.03111e+08	1.24075e+08	1.26504e+08	8.03334e+07	4.90425e+07	2.63331e+07	1.37828e+08	1.52429e+08	2.43603e+08	1.04712e+08	6.9789e+07	7.26191e+07	7.23876e+07	1.16836e+08	2.82121e+08	1.42477e+08	1.47666e+08
TRUE	High	Master Protein	O15067	Phosphoribosylformylglycinamidine synthase OS=Homo sapiens OX=9606 GN=PFAS PE=1 SV=4	17	PFAS	3.12872e+07	2.99687e+07	2.73094e+07	3.71453e+07	1.52961e+07	1.78993e+07	1.11898e+07	1.06933e+07	1.61631e+07	1.638e+07	1.33871e+07	8.55266e+06	9.14054e+06	1.10882e+07	2.24589e+07	2.60959e+07	2.86008e+07	7.33048e+06	7.68845e+06	1.19265e+07	6.33394e+07	2.10136e+07	2.05947e+07	1.04118e+07	1.13127e+07	2.92038e+07	1.28056e+07	2.65224e+07	3.44952e+07	3.43604e+07	2.96443e+06
TRUE	High	Master Protein	O15020	Spectrin beta chain, non-erythrocytic 2 OS=Homo sapiens OX=9606 GN=SPTBN2 PE=1 SV=3	12	SPTBN2	1.36877e+07	1.61417e+06	966659	1.09095e+07	7.8403e+06	2.34753e+06	7.41504e+06	2.11051e+06	1.44319e+06	1.21172e+06	1.23618e+07	3.2345e+06	8.46279e+06	1.35554e+08	1.24503e+07	2.07729e+07	3.80643e+08	2.68793e+06	6.11309e+06	4.12216e+06	5.14207e+06	1.27667e+08	1.47541e+07	2.65545e+06	1.10914e+07	8.5843e+06	3.60209e+07	3.48844e+06	2.46446e+08	1.95741e+06	1.40897e+06
TRUE	High	Master Protein	Q9HDC9	Adipocyte plasma membrane-associated protein OS=Homo sapiens OX=9606 GN=APMAP PE=1 SV=2	15	APMAP	1.21924e+08	1.71813e+08	8.175e+07	4.20125e+08	1.76993e+08	4.24377e+08	1.92627e+08	2.08516e+08	2.56279e+08	2.68098e+08	3.10871e+08	2.78019e+08	4.2039e+07	1.00952e+07	1.29761e+08	3.22137e+08	8.73095e+07	3.37478e+07	8.83514e+06	7.90641e+06	1.7533e+08	1.82487e+08	2.69763e+08	1.14638e+08	6.87085e+07	1.61648e+08	8.84197e+07	1.60667e+08	2.29139e+08	2.06566e+08	2.10912e+08
TRUE	High	Master Protein	P16435	NADPH--cytochrome P450 reductase OS=Homo sapiens OX=9606 GN=POR PE=1 SV=2	13	POR	3.41184e+07	6.07839e+07	5.158e+07	3.19045e+07	6.3783e+07	7.02837e+07	1.48729e+07	1.13184e+07	1.34043e+07	2.41488e+07	2.08045e+07	1.44021e+07	3.50502e+07	5.47484e+06	2.46282e+07	5.4563e+07	1.64699e+07	2.64797e+07	1.13413e+07	9.60884e+06	6.05816e+07	3.18491e+07	3.38153e+07	4.3385e+06	5.49541e+06	7.16099e+06	1.42642e+07	3.99307e+06	1.72109e+07	6.25247e+06	7.6246e+06
TRUE	High	Master Protein	O94819	Kelch repeat and BTB domain-containing protein 11 OS=Homo sapiens OX=9606 GN=KBTBD11 PE=1 SV=1	16	KBTBD11	3.39007e+07	1.07345e+08	5.96021e+07	3.70065e+07	3.80657e+07	2.39025e+07	6.97698e+07	6.91349e+07	1.70501e+07	8.17238e+06	1.72302e+07	1.02996e+07	2.75022e+07	2.14213e+07	2.66933e+07	2.98333e+07	3.02995e+07	9.90684e+06	1.49767e+07	1.16562e+07	2.09148e+07	1.07715e+08	4.96232e+07	3.18959e+07	2.29324e+07	4.83812e+07	5.92525e+07	3.98607e+07	3.748e+07	4.13237e+07	2.28426e+06
TRUE	High	Master Protein	P14780	Matrix metalloproteinase-9 OS=Homo sapiens OX=9606 GN=MMP9 PE=1 SV=3	22	MMP9	5.81872e+06	9.96122e+06	1.41055e+07	1.02146e+07	4.00975e+06	7.47563e+06	4.43589e+06	8.80758e+06	3.49871e+06	4.86422e+06	9.77057e+06	4.4415e+08	1.98429e+07	6.92893e+06	2.22591e+07	1.6814e+07	7.08196e+06	1.90913e+07	6.72884e+06	1.12366e+07	3.17248e+07	6.53379e+06	5.09255e+07	3.44922e+06	1.09329e+07	1.42517e+07	6.98479e+06	1.24428e+07	2.32576e+07	1.29713e+07	1.30815e+07
TRUE	High	Master Protein	Q9NZW5	MAGUK p55 subfamily member 6 OS=Homo sapiens OX=9606 GN=MPP6 PE=1 SV=2	18	MPP6	7.87368e+07	2.01911e+08	1.12837e+08	5.73412e+07	3.22569e+07	3.52635e+07	2.73361e+07	2.28493e+07	9.37381e+07	5.15745e+07	6.80642e+07	1.45179e+08	6.87201e+07	6.06864e+07	1.13649e+08	4.62795e+07	4.18047e+07	1.9467e+07	5.02317e+07	6.54533e+07	6.60841e+07	4.9944e+07	8.74705e+07	9.24571e+07	1.41162e+08	1.56637e+08	4.14385e+07	1.31876e+08	1.17133e+08	1.79317e+08	8.4851e+07
TRUE	High	Master Protein	Q02790	Peptidyl-prolyl cis-trans isomerase FKBP4 OS=Homo sapiens OX=9606 GN=FKBP4 PE=1 SV=3	16	FKBP4	8.0179e+07	5.63374e+07	2.24284e+07	6.91058e+07	4.31327e+07	4.81662e+07	4.62764e+07	3.94187e+07	2.9822e+07	5.91423e+07	4.24226e+07	4.01774e+07	1.88928e+07	2.14748e+07	2.45069e+07	6.26077e+07	2.51463e+08	1.55973e+07	8.13719e+06	1.64373e+07	8.65476e+07	1.53671e+08	6.71818e+07	7.33469e+07	4.2387e+06	9.17562e+06	2.58458e+07	7.19581e+06	2.33675e+07	3.045e+07	1.19579e+07
TRUE	High	Master Protein	P08294	Extracellular superoxide dismutase [Cu-Zn] OS=Homo sapiens OX=9606 GN=SOD3 PE=1 SV=2	10	SOD3	4.38499e+07	3.67801e+07	3.02019e+07	2.36891e+07	3.98346e+07	2.73044e+07	2.04701e+07	2.05629e+07	4.93558e+07	2.86914e+07	2.59374e+07	2.24088e+07	6.48707e+08	3.47949e+08	1.45645e+07	2.07946e+07	2.30557e+07	2.27004e+08	2.21603e+08	2.47167e+08	2.36102e+07	4.22708e+07	4.02994e+07	5.81896e+06	1.56482e+08	3.93167e+07	1.03355e+08	2.15464e+08	4.63253e+07	4.99185e+07	4.12942e+07
TRUE	High	Master Protein	P00736	Complement C1r subcomponent OS=Homo sapiens OX=9606 GN=C1R PE=1 SV=2	19	C1R	5.63677e+07	2.7062e+07	4.04274e+07	1.86734e+07	2.31082e+07	5.71622e+07	1.36391e+07	6.03076e+06	1.58178e+07	1.36899e+07	1.91319e+07	3.97725e+07	7.68388e+07	1.33591e+08	2.30076e+07	1.84351e+07	3.60297e+07	7.16171e+07	5.91634e+07	4.57577e+07	3.35424e+07	2.35324e+07	7.0449e+07	5.5769e+07	1.81258e+07	2.88745e+07	6.04528e+07	2.11034e+07	1.91148e+07	4.59976e+07	1.5303e+07
TRUE	High	Master Protein	P29373	Cellular retinoic acid-binding protein 2 OS=Homo sapiens OX=9606 GN=CRABP2 PE=1 SV=2	10	CRABP2	1.96333e+08	5.54873e+08	7.51665e+07	1.35644e+08	4.73892e+08	1.25796e+08	1.61782e+08	4.89927e+07	7.84462e+08	3.20548e+08	8.85359e+08	1.09093e+08	1.70149e+08	1.11617e+08	2.86212e+08	2.33235e+08	5.27362e+08	1.75837e+08	5.13468e+07	3.67503e+07	5.99408e+08	2.38667e+08	7.21045e+07	1.1491e+08	8.2577e+07	7.68947e+07	1.75781e+07	2.07635e+08	6.03616e+08	2.76831e+08	2.66732e+07
TRUE	High	Master Protein	Q13409	Cytoplasmic dynein 1 intermediate chain 2 OS=Homo sapiens OX=9606 GN=DYNC1I2 PE=1 SV=3	15	DYNC1I2	7.97292e+07	8.91858e+07	2.82707e+07	1.45167e+08	8.30286e+07	1.64087e+08	7.5396e+07	1.07919e+08	1.07657e+08	1.17403e+08	7.8135e+07	5.42037e+07	6.36844e+07	1.05897e+07	1.37231e+08	4.27627e+07	4.77662e+07	2.22518e+07	2.74163e+06	5.60435e+06	1.07411e+08	1.15891e+08	6.60893e+06	1.28853e+07	4.53549e+06	1.69175e+07	2.28533e+06	1.35071e+07	2.98017e+07	6.29596e+07	5.10383e+07
TRUE	High	Master Protein	Q96I24	Far upstream element-binding protein 3 OS=Homo sapiens OX=9606 GN=FUBP3 PE=1 SV=2	16	FUBP3	7.70177e+07	5.35403e+07	1.02549e+07	5.24685e+07	1.2739e+07	3.82818e+07	1.45646e+07	3.35971e+07	3.5958e+07	5.09924e+07	4.02472e+07	2.54697e+07	4.17434e+07	2.14588e+07	6.50597e+07	4.35945e+07	3.92802e+07	1.73479e+07	1.33926e+07	4.65259e+06	1.10679e+08	1.33078e+08	1.11097e+08	2.30348e+08	4.19568e+07	2.16882e+08	1.31766e+08	6.88752e+08	1.61712e+08	6.318e+07	1.10046e+08
TRUE	High	Master Protein	P52565	Rho GDP-dissociation inhibitor 1 OS=Homo sapiens OX=9606 GN=ARHGDIA PE=1 SV=3	9	ARHGDIA	4.01335e+08	3.63568e+08	2.65066e+08	2.87253e+08	2.06052e+08	2.75401e+08	2.29675e+08	1.65842e+08	2.37785e+08	2.66162e+08	1.8561e+08	1.40752e+08	1.58105e+08	8.58974e+07	1.71746e+08	2.81463e+08	3.49438e+08	1.15756e+08	7.44178e+07	6.81946e+07	3.74748e+08	2.81084e+08	3.41656e+08	2.12661e+07	1.34805e+07	4.47177e+07	2.77567e+07	5.27494e+07	1.3793e+08	2.49694e+08	7.40093e+07
TRUE	High	Master Protein	P19971	Thymidine phosphorylase OS=Homo sapiens OX=9606 GN=TYMP PE=1 SV=2	15	TYMP; SCO2	3.42351e+07	1.30782e+07	2.47501e+07	1.18214e+08	4.58355e+07	4.62626e+07	1.35081e+07	7.78601e+06	2.37915e+07	6.64742e+07	3.0257e+07	3.33231e+07	2.31311e+07	4.15986e+07	2.02941e+07	2.91366e+07	1.97497e+07	1.30174e+07	3.75444e+07	4.69458e+06	4.1879e+07	4.47763e+07	2.37351e+07	2.78473e+06	1.30688e+07	1.27944e+07	1.54361e+07	1.015e+07	1.89593e+07	2.34806e+07	2.87577e+07
TRUE	High	Master Protein	Q99623	Prohibitin-2 OS=Homo sapiens OX=9606 GN=PHB2 PE=1 SV=2	14	PHB2	4.33873e+08	4.75449e+08	2.77042e+08	6.51953e+08	3.44431e+08	7.07886e+08	2.87503e+08	2.5557e+08	2.8372e+08	3.38112e+08	1.96907e+08	2.76261e+08	2.08589e+08	1.02839e+08	2.7808e+08	2.33997e+08	1.54761e+08	1.36305e+08	9.15253e+07	3.12349e+07	4.67003e+08	3.82305e+08	3.62112e+08	6.74213e+08	2.38861e+08	3.69519e+08	3.39135e+08	3.23332e+08	4.43307e+08	4.79871e+08	6.56962e+08
TRUE	High	Master Protein	O75131	Copine-3 OS=Homo sapiens OX=9606 GN=CPNE3 PE=1 SV=1	15	CPNE3	1.1884e+08	1.27676e+08	9.80206e+07	1.53177e+08	7.76776e+07	9.63107e+07	8.98715e+07	7.78359e+07	8.22451e+07	7.7728e+07	8.48268e+07	6.93666e+07	9.1989e+07	4.39119e+07	1.3634e+08	1.34371e+08	1.0519e+08	5.95145e+07	3.01742e+07	1.25741e+07	2.84273e+08	1.30521e+08	9.0582e+07	1.49711e+07	2.14266e+08	1.01962e+08	6.36193e+07	9.26076e+07	1.55737e+08	1.20383e+08	8.23314e+07
TRUE	High	Master Protein	Q14166	Tubulin--tyrosine ligase-like protein 12 OS=Homo sapiens OX=9606 GN=TTLL12 PE=1 SV=2	16	TTLL12	3.96149e+07	8.581e+07	3.00663e+07	2.83293e+07	5.25681e+07	2.03965e+07	2.65004e+07	8.39614e+07	4.26591e+07	1.81087e+07	5.70111e+07	1.51494e+07	1.66197e+07	1.11164e+07	2.00477e+07	3.36682e+07	1.53852e+07	2.07448e+07	7.64196e+06	3.73003e+07	6.65777e+07	1.28855e+07	3.17507e+07	1.56783e+07	9.73562e+06	1.24727e+07	8.31389e+06	9.30995e+06	4.47887e+07	1.28287e+07	1.32204e+07
TRUE	High	Master Protein	O14773	Tripeptidyl-peptidase 1 OS=Homo sapiens OX=9606 GN=TPP1 PE=1 SV=2	8	TPP1	2.83538e+08	2.3429e+08	1.67747e+08	5.48569e+08	3.67805e+08	2.89879e+08	8.75161e+07	2.14179e+08	2.36968e+08	4.05357e+08	3.52664e+08	3.13319e+08	2.55498e+08	4.12895e+07	2.22205e+08	3.1695e+08	1.09056e+08	9.40359e+07	3.31076e+07	2.12042e+07	2.73916e+08	2.19994e+08	1.25268e+08	2.27174e+07	5.33968e+07	6.7593e+07	1.63261e+08	3.02971e+08	1.66293e+08	2.54003e+08	5.4193e+08
TRUE	High	Master Protein	Q96BM9	ADP-ribosylation factor-like protein 8A OS=Homo sapiens OX=9606 GN=ARL8A PE=1 SV=1	3	ARL8A	2.10327e+08	1.73774e+08	8.05478e+07	2.1945e+08	1.425e+08	1.16335e+08	9.06988e+07	1.00652e+08	1.20019e+08	1.62951e+08	1.41943e+08	1.12475e+08	8.46904e+07	4.59734e+07	1.89158e+08	1.60164e+08	9.11562e+07	7.32691e+07	4.8303e+07	2.04817e+07	2.42734e+08	1.316e+08	4.39748e+07	3.07513e+07	9.153e+07	7.81379e+07	6.1629e+07	6.32844e+07	1.18277e+08	7.01466e+07	1.40062e+08
TRUE	High	Master Protein	P13746	HLA class I histocompatibility antigen, A-11 alpha chain OS=Homo sapiens OX=9606 GN=HLA-A PE=1 SV=1	1	HLA-A	42225	107466	203257	213548	7451.46	140165	90552.7	192314	123722	471691	36762.2	121182	156151	27286.4	186263	185142	1832.28	161764	72173.5	83434.7	202743	72371.3	161418	6342.87	68247.6	120091	13541.8	74606.4	144949	62050.9	141608
TRUE	High	Master Protein	P14868	Aspartate--tRNA ligase, cytoplasmic OS=Homo sapiens OX=9606 GN=DARS PE=1 SV=2	21	DARS	8.97586e+07	1.03027e+08	4.5814e+07	1.61743e+08	7.2725e+07	1.05174e+08	9.71589e+07	6.32725e+07	9.21178e+07	1.25046e+08	6.01128e+07	1.63697e+08	1.03688e+08	4.51037e+07	1.25578e+08	1.88881e+08	7.53233e+07	1.80352e+08	2.68502e+07	1.60482e+07	1.7094e+08	1.45233e+08	1.42651e+08	5.86772e+07	8.41825e+07	1.12627e+08	1.12568e+08	1.21917e+08	2.04039e+08	1.7677e+08	1.79233e+08
TRUE	High	Master Protein	P60903	Protein S100-A10 OS=Homo sapiens OX=9606 GN=S100A10 PE=1 SV=2	10	S100A10	2.09533e+09	5.11636e+08	2.40474e+08	7.09805e+08	5.57423e+08	4.37695e+08	5.08374e+08	5.57361e+08	6.90861e+08	1.26879e+09	7.1196e+08	1.31842e+08	4.13764e+08	1.28323e+08	9.30716e+08	2.88946e+07	5.29124e+08	1.99603e+08	1.23045e+08	5.41975e+07	1.04387e+09	2.4698e+08	3.01721e+08	2.68194e+08	1.80808e+07	2.87164e+07	2.72372e+07	8.32169e+07	1.76756e+08	2.32066e+08	4.63893e+08
TRUE	High	Master Protein	Q9UNZ2	NSFL1 cofactor p47 OS=Homo sapiens OX=9606 GN=NSFL1C PE=1 SV=2	16	NSFL1C	5.73222e+07	7.68086e+07	8.05925e+07	1.03257e+08	1.00334e+08	9.63006e+07	9.87283e+07	7.08842e+07	6.99445e+07	1.56062e+08	7.81364e+07	4.20423e+07	5.96515e+07	5.24608e+07	3.82562e+07	7.60007e+07	1.77066e+08	8.66308e+07	5.38236e+07	9.52522e+07	1.78394e+08	2.43185e+08	6.14905e+07	6.47316e+07	3.0258e+07	3.07041e+07	2.35757e+07	3.40682e+07	3.93064e+07	3.59323e+07	6.99838e+07
TRUE	High	Master Protein	P11766	Alcohol dehydrogenase class-3 OS=Homo sapiens OX=9606 GN=ADH5 PE=1 SV=4	11	ADH5	8.99159e+07	1.77337e+08	8.64819e+07	1.61418e+08	1.09678e+08	9.03948e+07	8.80459e+07	6.70533e+07	1.95589e+08	1.27083e+08	8.63372e+07	7.44185e+07	8.68185e+07	2.10481e+07	9.14488e+07	1.93507e+08	5.00909e+07	5.50688e+07	1.76681e+07	2.94369e+07	1.12005e+08	8.39134e+07	5.14251e+07	6.74446e+06	3.38341e+07	4.54588e+07	6.15461e+07	7.50851e+07	1.73942e+08	7.05937e+07	9.25888e+07
TRUE	High	Master Protein	Q15233	Non-POU domain-containing octamer-binding protein OS=Homo sapiens OX=9606 GN=NONO PE=1 SV=4	14	NONO	2.19735e+08	1.77042e+08	5.98769e+07	1.70786e+08	9.74058e+07	2.45462e+08	9.35983e+07	9.37905e+07	8.8856e+07	1.70081e+08	2.69376e+07	1.22901e+07	4.3572e+07	5.53595e+07	6.88057e+07	1.89953e+07	4.19014e+07	3.54154e+07	2.95315e+07	3.88235e+07	1.77282e+08	1.58866e+08	4.34172e+07	2.16502e+08	4.2428e+07	5.8693e+07	5.91832e+07	6.76556e+07	1.5332e+08	1.10072e+08	1.06783e+08
TRUE	High	Master Protein	P61224	Ras-related protein Rap-1b OS=Homo sapiens OX=9606 GN=RAP1B PE=1 SV=1	6	RAP1B	2.64094e+08	2.13913e+08	1.17219e+08	3.10914e+08	2.15106e+08	2.89189e+08	1.62905e+08	1.78499e+08	3.01486e+08	3.0026e+08	1.72779e+08	2.98031e+08	1.84581e+08	7.32927e+07	2.21334e+08	2.26785e+08	1.01504e+08	1.10729e+08	3.80646e+07	3.93692e+07	1.01578e+08	3.66859e+08	1.99598e+08	4.75566e+06	1.36201e+08	2.30808e+08	1.94091e+08	2.06953e+08	4.9955e+08	1.24885e+08	2.21538e+08
TRUE	High	Master Protein	P09382	Galectin-1 OS=Homo sapiens OX=9606 GN=LGALS1 PE=1 SV=2	10	LGALS1	1.45482e+09	1.53873e+09	6.13969e+08	7.14169e+08	1.63715e+09	9.35715e+08	2.34363e+09	6.75023e+08	1.90257e+09	9.76946e+08	9.9764e+08	1.42662e+09	1.09925e+09	9.37968e+08	1.14951e+09	2.14312e+09	1.83542e+09	9.86603e+08	4.89026e+08	1.96491e+08	5.47444e+08	1.27402e+09	2.24819e+09	1.81837e+09	7.20382e+08	1.53364e+09	1.01973e+09	1.96645e+09	2.20585e+09	1.21048e+09	7.3976e+08
TRUE	High	Master Protein	Q04917	14-3-3 protein eta OS=Homo sapiens OX=9606 GN=YWHAH PE=1 SV=4	14	YWHAH	1.50042e+09	5.0246e+08	3.7196e+09	4.94971e+08	2.00137e+08	2.4466e+08	3.63245e+08	3.10973e+08	4.98495e+08	8.58872e+08	6.1378e+08	1.26207e+08	1.21336e+08	7.86975e+08	1.39667e+08	2.83634e+08	5.72362e+08	1.34726e+08	7.17954e+08	9.07992e+08	4.88973e+08	1.98697e+08	8.17543e+07	2.48876e+08	8.27478e+07	1.29839e+08	1.7519e+08	1.30436e+08	1.13322e+08	1.30851e+08	1.99099e+08
TRUE	High	Master Protein	Q66K74	Microtubule-associated protein 1S OS=Homo sapiens OX=9606 GN=MAP1S PE=1 SV=2	20	MAP1S	4.50843e+07	3.6079e+07	2.65542e+07	7.63322e+07	3.64261e+07	5.71112e+07	3.34273e+07	2.40271e+07	2.48157e+07	7.29439e+07	2.44751e+07	9.67693e+06	1.68751e+07	9.9111e+06	1.80179e+07	2.53512e+07	6.26201e+07	1.12391e+07	5.34685e+06	3.79133e+06	4.47357e+07	1.91801e+07	5.37651e+07	1.23651e+09	1.25426e+07	3.20849e+07	3.20704e+07	2.20711e+07	8.08218e+07	5.50428e+07	2.97087e+07
TRUE	High	Master Protein	Q5VYK3	Proteasome adapter and scaffold protein ECM29 OS=Homo sapiens OX=9606 GN=ECPAS PE=1 SV=2	24	KIAA0368	1.59997e+07	3.19263e+07	3.41402e+07	1.36354e+07	1.3001e+07	8.25623e+06	9.55337e+06	1.32718e+07	1.10063e+07	1.63544e+07	2.06596e+07	8.58838e+06	1.48604e+07	3.35929e+06	1.64825e+07	1.90087e+07	1.3786e+07	4.93434e+07	4.8496e+06	1.2374e+08	1.85038e+07	2.75669e+07	3.34759e+06	1.02543e+07	7.86142e+07	5.43295e+07	3.67428e+07	4.24698e+07	3.01899e+07	3.8154e+07	2.81651e+07
TRUE	High	Master Protein	P21266	Glutathione S-transferase Mu 3 OS=Homo sapiens OX=9606 GN=GSTM3 PE=1 SV=3	15	GSTM3	8.79881e+07	4.54336e+08	2.73556e+08	4.5306e+08	1.13698e+08	9.83567e+07	1.3689e+08	7.74851e+07	4.48528e+08	1.01421e+08	1.57517e+08	1.52314e+08	1.29869e+08	1.21578e+08	8.64504e+07	1.67012e+08	9.19205e+07	1.08112e+08	9.48609e+07	4.80983e+07	4.68621e+07	3.24145e+08	2.86626e+08	1.27847e+08	1.27023e+08	1.08687e+08	1.93477e+08	1.16941e+08	2.19143e+08	8.50833e+07	2.42856e+08
TRUE	High	Master Protein	P0DOX2	Immunoglobulin alpha-2 heavy chain OS=Homo sapiens OX=9606 PE=1 SV=1	5		3.08612e+07	2.06135e+07	3.60058e+07	3.64098e+07	5.54108e+07	3.69076e+07	6.31563e+07	6.19925e+07	3.3894e+07	1.61369e+07	6.95847e+07	1.06868e+08	1.27588e+08	3.35337e+08	2.82839e+07	5.05659e+07	5.01684e+07	1.52691e+08	1.82563e+08	7.00309e+07	3.3122e+07	3.1606e+07	1.50258e+07	600262	3.24237e+07	2.76415e+07	1.96396e+07	1.20068e+07	1.05741e+07	2.61628e+07	4.36444e+07
TRUE	High	Master Protein	P50416	Carnitine O-palmitoyltransferase 1, liver isoform OS=Homo sapiens OX=9606 GN=CPT1A PE=1 SV=2	18	CPT1A	1.24333e+08	3.05749e+07	2.03152e+07	6.02235e+07	1.24053e+07	8.2752e+07	1.24505e+07	1.91897e+07	1.83964e+07	2.74269e+07	1.82963e+07	2.69532e+07	7.04895e+06	7.74905e+06	2.60608e+07	3.14134e+07	2.09763e+07	5.93572e+06	4.37563e+06	3.30945e+06	2.17049e+07	1.56657e+07	8.13688e+06	4.26035e+06	9.13668e+06	4.59886e+07	1.24024e+07	2.71159e+07	3.3785e+07	1.81982e+07	2.58984e+07
TRUE	High	Master Protein	Q9UJ70	N-acetyl-D-glucosamine kinase OS=Homo sapiens OX=9606 GN=NAGK PE=1 SV=4	15	NAGK	8.99972e+07	9.877e+07	6.60603e+07	1.41039e+08	7.08693e+07	7.68708e+07	9.61513e+07	1.83259e+08	1.07659e+08	1.14901e+08	1.0655e+08	1.04721e+08	5.34512e+07	7.96563e+06	6.89924e+07	1.05923e+08	3.76279e+07	3.22212e+07	1.12109e+07	1.55347e+07	1.04192e+08	6.36435e+07	3.52856e+07	2.9923e+07	2.25373e+07	6.02314e+07	5.14586e+07	5.78241e+07	7.65194e+07	1.04664e+08	1.30273e+08
TRUE	High	Master Protein	P11171	Protein 4.1 OS=Homo sapiens OX=9606 GN=EPB41 PE=1 SV=4	18	EPB41	1.92599e+07	5.71698e+07	2.1267e+07	9.15136e+06	4.00529e+07	2.33557e+07	2.42947e+07	2.53381e+07	1.371e+07	2.71976e+07	1.37083e+07	1.22856e+07	4.85721e+06	1.34392e+07	1.21592e+07	3.15041e+07	4.64934e+07	1.21908e+07	2.0189e+07	7.989e+07	2.21326e+07	1.44542e+07	1.62151e+07	1.49093e+07	5.48788e+07	3.39118e+07	2.81342e+07	2.51299e+07	2.42994e+07	1.70044e+07	3.09257e+07
TRUE	High	Master Protein	P01019	Angiotensinogen OS=Homo sapiens OX=9606 GN=AGT PE=1 SV=1	13	AGT	2.30591e+07	1.42384e+07	6.05075e+07	2.6644e+07	5.82417e+07	4.96747e+07	7.80324e+07	1.10381e+08	3.47546e+07	2.94335e+07	4.84831e+07	5.3365e+07	3.06892e+07	8.09175e+07	1.78361e+07	3.11688e+07	4.93147e+07	7.17048e+07	5.27951e+07	8.85884e+07	4.2697e+07	5.08453e+07	4.78493e+07	2.39342e+06	1.61814e+07	2.81011e+07	3.01148e+07	6.31548e+07	1.83328e+07	6.88251e+07	3.08109e+07
TRUE	High	Master Protein	Q5T6W2	Heterogeneous nuclear ribonucleoprotein K (Fragment) OS=Homo sapiens OX=9606 GN=HNRNPK PE=1 SV=1	1	HNRNPK	2.54125e+06	2.26776e+07	3.48833e+06	1.36021e+07	2.03188e+07	1.49198e+07	2.142e+07	1.55426e+07	2.81337e+07	1.58427e+07	1.60575e+07	2.1499e+06	6.26449e+06	1.41522e+07	4.93644e+06	4.27835e+06	5.24554e+06	6.5912e+06	4.66192e+06	275922	6.97758e+06	3.29161e+06	4.97225e+06	132777	175481	2.78661e+06	1.84658e+06	18681.7	3.21346e+06	3.28632e+06	15872.4
TRUE	High	Master Protein	P01892	HLA class I histocompatibility antigen, A-2 alpha chain OS=Homo sapiens OX=9606 GN=HLA-A PE=1 SV=1	2	HLA-A; LOC100507703	3.23161e+07	4.48895e+07	1.44396e+07	2.68357e+07	2.32002e+07	1.46948e+07	7.35006e+07	1.17767e+07	3.60839e+07	2.8614e+07	1.79323e+06	183413	265578	1.36138e+07	359843	5.4226e+06	967105	3.31547e+06	6.42508e+06	754333	4.47817e+07	2.29584e+07	2.08945e+06	290333	2.36459e+06	5.71367e+06	5.81558e+06	2.53074e+06	2.73733e+07	4.54378e+06	9.61432e+06
TRUE	High	Master Protein	P26583	High mobility group protein B2 OS=Homo sapiens OX=9606 GN=HMGB2 PE=1 SV=2	9	HMGB2	3.57521e+08	1.01081e+08	1.64027e+07	1.5897e+08	2.0733e+08	1.31764e+08	4.03763e+08	4.96744e+07	3.72059e+07	4.43439e+08	7.11526e+06	7.46082e+08	3.84833e+06	3.44336e+06	6.88928e+07	4.21839e+07	3.67607e+07	1.39459e+07	2.11033e+07	4.66223e+06	4.32713e+07	1.30846e+08	2.33107e+08	1.68082e+08	1.8702e+07	2.23012e+07	3.65556e+07	2.38968e+07	1.01686e+08	7.39521e+07	7.21668e+07
TRUE	High	Master Protein	P12235	ADP/ATP translocase 1 OS=Homo sapiens OX=9606 GN=SLC25A4 PE=1 SV=4	4	SLC25A4	2.31394e+07	3.00949e+07	8.26646e+06	4.30732e+07	2.73862e+07	2.82347e+07	1.85807e+07	2.63445e+07	1.64004e+07	4.00383e+07	2.69865e+07	1.31805e+07	1.64525e+07	6.4227e+06	3.78623e+07	3.44874e+07	1.01682e+07	1.16717e+07	1.5605e+06	2.39985e+06	2.56541e+07	4.09138e+07	5.09973e+06	1.12573e+07	2.90061e+07	7.65067e+07	1.1915e+08	3.80686e+07	9.76994e+07	2.74839e+07	2.34521e+07
TRUE	High	Master Protein	P52597	Heterogeneous nuclear ribonucleoprotein F OS=Homo sapiens OX=9606 GN=HNRNPF PE=1 SV=3	10	HNRNPF	5.22359e+07	3.84214e+07	1.25944e+07	4.00605e+07	2.12755e+07	1.75472e+07	1.27388e+07	6.14233e+06	9.31983e+06	3.1299e+07	6.19211e+06	1.61311e+07	3.11168e+07	1.18034e+07	9.641e+06	5.94597e+06	9.27541e+06	1.05426e+07	4.88252e+06	6.36184e+06	1.30269e+07	2.2738e+07	1.10138e+07	1.25041e+06	2.39324e+06	3.80212e+06	767785	699833	984004	5.71123e+06	1.30572e+07
TRUE	High	Master Protein	P00568	Adenylate kinase isoenzyme 1 OS=Homo sapiens OX=9606 GN=AK1 PE=1 SV=3	10	AK1	2.32685e+08	2.19538e+08	3.47071e+08	2.30202e+08	1.72182e+08	1.77172e+08	1.4608e+08	8.76335e+07	5.1376e+08	2.88362e+08	4.46607e+08	1.52613e+08	2.4963e+08	1.33348e+08	2.87121e+08	1.97021e+08	8.57588e+07	1.32652e+08	1.87395e+08	1.13237e+08	1.70717e+08	3.17751e+08	8.9158e+07	2.32468e+08	1.98036e+08	2.93645e+08	2.41936e+08	1.82202e+08	7.28232e+08	2.13099e+08	1.6382e+08
TRUE	High	Master Protein	Q8WVM8	Sec1 family domain-containing protein 1 OS=Homo sapiens OX=9606 GN=SCFD1 PE=1 SV=4	13	SCFD1	3.35192e+07	3.89847e+07	2.42718e+07	6.41879e+07	3.97744e+07	4.69656e+07	1.62175e+07	3.25829e+07	3.69612e+07	4.04063e+07	4.31341e+07	7.5944e+06	1.12166e+07	8.07421e+06	1.05587e+07	2.506e+07	1.87269e+07	5.25622e+06	5.54231e+06	4.23415e+07	2.27164e+07	1.39795e+07	3.77287e+06	963474	2.78483e+06	3.41683e+06	8.7271e+06	3.22389e+06	1.61337e+07	5.22496e+06	8.07645e+06
TRUE	High	Master Protein	E9PGF5	Tensin-1 OS=Homo sapiens OX=9606 GN=TNS1 PE=1 SV=1	8	TNS1	1.41841e+07	1.46461e+07	7.19588e+06	1.45951e+07	1.66701e+07	1.29342e+07	2.12293e+07	1.22044e+07	8.194e+06	2.30111e+07	1.46978e+07	5.65359e+06	5.89661e+06	5.41552e+06	5.30319e+06	1.04399e+07	1.7264e+06	2.32571e+06	2.29249e+06	964046	7.05488e+06	2.4827e+06	1.03725e+08	920919	2.25804e+07	4.41281e+07	8.22278e+07	3.88903e+07	4.76925e+07	1.90197e+07	2.23308e+07
TRUE	High	Master Protein	Q96CS3	FAS-associated factor 2 OS=Homo sapiens OX=9606 GN=FAF2 PE=1 SV=2	13	FAF2	4.68857e+07	9.12525e+07	1.50357e+07	6.99178e+07	3.19722e+07	8.83607e+07	8.73872e+07	1.089e+08	4.7645e+07	6.31536e+07	3.85529e+07	1.08908e+07	5.88426e+06	8.86193e+06	8.33728e+06	1.63665e+07	1.50139e+07	1.05214e+07	1.10793e+07	2.64315e+06	2.72722e+07	2.92465e+07	3.20314e+07	1.45049e+06	1.05067e+07	1.66956e+07	1.25829e+06	1.5479e+07	3.89045e+07	1.1244e+07	1.28829e+07
TRUE	High	Master Protein	P61163	Alpha-centractin OS=Homo sapiens OX=9606 GN=ACTR1A PE=1 SV=1	6	ACTR1A	6.54298e+07	5.95203e+07	4.9729e+07	6.70759e+07	3.83237e+07	3.40423e+07	2.88947e+07	2.956e+07	7.19695e+07	2.47132e+07	5.2691e+07	1.24874e+07	3.80794e+07	1.73271e+07	1.34977e+07	2.021e+07	3.75991e+07	2.37457e+07	1.80818e+07	1.72907e+07	3.95328e+07	3.85938e+07	3.36414e+06	753677	1.478e+06	2.27523e+06	2.74553e+06	1.63605e+06	1.45688e+06	3.45812e+06	1.48099e+07
TRUE	High	Master Protein	P49257	Protein ERGIC-53 OS=Homo sapiens OX=9606 GN=LMAN1 PE=1 SV=2	12	LMAN1	6.28627e+07	8.51407e+07	5.39277e+07	1.15763e+08	5.07759e+07	6.73384e+07	6.20723e+07	7.33768e+07	6.22635e+07	9.06371e+07	6.77378e+07	1.0891e+08	3.62433e+07	8.55429e+06	4.88155e+07	1.11944e+08	3.03594e+07	2.05498e+07	4.26731e+06	1.27661e+07	1.05065e+08	4.96672e+07	4.54922e+07	6.49099e+06	1.6598e+07	4.82689e+07	2.65343e+07	4.67076e+07	6.95342e+07	4.62791e+07	4.2086e+07
TRUE	High	Master Protein	P04181	Ornithine aminotransferase, mitochondrial OS=Homo sapiens OX=9606 GN=OAT PE=1 SV=1	18	OAT	3.07446e+07	2.50191e+07	1.81501e+07	6.57109e+07	1.21993e+07	4.32479e+07	2.72059e+07	1.33248e+07	4.27963e+07	4.06114e+07	4.94353e+07	1.67815e+07	2.6546e+07	3.61237e+07	2.34779e+07	3.54449e+07	1.56557e+07	1.54856e+07	2.80205e+07	1.74127e+07	2.77297e+07	4.91218e+07	2.95325e+07	3.48991e+07	2.18386e+07	4.92244e+07	4.74927e+07	9.59038e+07	9.14193e+07	1.02908e+08	6.78988e+07
TRUE	High	Master Protein	P21964	Catechol O-methyltransferase OS=Homo sapiens OX=9606 GN=COMT PE=1 SV=2	12	COMT	4.81657e+07	7.77751e+07	2.59298e+07	8.92946e+07	6.88213e+07	3.82017e+07	7.16937e+07	6.65319e+07	6.55852e+07	6.40328e+07	3.28167e+07	3.13663e+07	3.14725e+07	5.48972e+06	3.9925e+07	2.52732e+07	2.04931e+07	2.7175e+07	5.56878e+06	5.90009e+06	8.97382e+07	3.9847e+07	4.64327e+06	1.94507e+07	1.16308e+07	2.46595e+07	4.47662e+06	1.50951e+07	1.85996e+07	3.0922e+07	3.603e+07
TRUE	High	Master Protein	Q13724	Mannosyl-oligosaccharide glucosidase OS=Homo sapiens OX=9606 GN=MOGS PE=1 SV=5	18	MOGS	3.0502e+07	5.35689e+07	5.78857e+07	9.15544e+07	2.14136e+07	5.80577e+07	2.04731e+07	3.32808e+07	5.11008e+07	3.60739e+07	4.85541e+07	5.01637e+07	2.65571e+07	2.85547e+07	3.68996e+07	4.10664e+07	1.59997e+07	1.07101e+07	3.80009e+06	4.85476e+06	5.18531e+07	2.94895e+07	5.52623e+07	2.13807e+07	9.72619e+06	3.28565e+07	1.2591e+07	3.02524e+07	2.97339e+07	2.16543e+07	4.33565e+07
TRUE	High	Master Protein	P05387	60S acidic ribosomal protein P2 OS=Homo sapiens OX=9606 GN=RPLP2 PE=1 SV=1	9	RPLP2	2.82698e+08	3.41255e+08	6.25463e+07	3.7967e+08	1.10704e+08	2.30854e+08	1.37896e+08	1.1467e+08	1.58754e+08	4.11872e+08	1.32036e+08	1.54013e+08	8.16941e+07	7.27028e+07	1.39928e+08	2.43859e+08	2.29431e+08	7.95417e+07	7.73233e+07	2.44926e+07	3.80213e+08	2.25924e+08	1.79684e+08	7.01575e+06	5.50325e+07	1.19487e+08	6.61937e+07	7.47115e+07	2.07599e+08	1.29984e+08	1.97648e+08
TRUE	High	Master Protein	H0YND0	Fibrillin-1 (Fragment) OS=Homo sapiens OX=9606 GN=FBN1 PE=1 SV=1	3		3.37233e+06	5.13013e+06	387305	285775	2.18346e+06	1.61475e+06	2.4862e+06	4.51295e+06	210529	354750	663268	1.07966e+07	386680	337631	328009	312187	4.11466e+06	1.61605e+06	173639	309824	446785	1.79932e+06	8.18279e+06	319078	1.06332e+06	279324	359507	327716	1.83652e+06	339589	1.19009e+06
TRUE	High	Master Protein	Q68CZ2	Tensin-3 OS=Homo sapiens OX=9606 GN=TNS3 PE=1 SV=2	16	TNS3	5.0502e+07	1.28034e+07	9.01487e+06	8.17744e+06	6.64034e+06	7.09952e+06	2.80622e+06	2.87967e+06	5.21391e+06	1.05243e+07	7.58223e+06	5.50506e+06	4.62748e+06	2.9198e+06	2.77267e+06	2.92159e+07	5.30337e+06	5.62802e+06	3.42032e+06	3.17405e+06	2.09128e+07	1.24387e+07	2.10618e+07	6.205e+06	3.98377e+06	6.96396e+06	5.52182e+06	4.70445e+06	1.42032e+07	4.29148e+06	1.05803e+07
TRUE	High	Master Protein	P38919	Eukaryotic initiation factor 4A-III OS=Homo sapiens OX=9606 GN=EIF4A3 PE=1 SV=4	17	EIF4A3	7.80434e+07	6.73499e+07	1.39043e+07	9.4186e+07	4.25576e+07	6.84839e+07	3.09557e+07	2.5597e+07	4.11219e+07	4.63823e+07	4.89576e+07	6.03147e+07	2.71471e+07	1.22824e+07	2.12192e+08	8.75995e+07	2.69703e+07	1.56841e+07	7.37536e+06	5.5291e+06	2.07937e+08	9.18382e+07	3.78232e+07	9.30799e+07	3.06187e+07	4.96241e+07	7.01875e+07	4.22339e+07	6.18279e+07	6.38452e+07	1.0918e+08
TRUE	High	Master Protein	P17980	26S proteasome regulatory subunit 6A OS=Homo sapiens OX=9606 GN=PSMC3 PE=1 SV=3	12	PSMC3	6.86292e+07	6.97793e+07	4.29631e+07	7.65256e+07	4.47302e+07	5.2495e+07	2.73945e+07	3.08302e+07	4.59608e+07	6.6191e+07	3.67125e+07	5.65079e+07	2.50837e+07	6.97868e+07	4.4399e+07	4.91163e+07	4.55763e+07	5.3561e+07	2.60062e+07	1.51956e+07	4.89108e+07	5.76845e+07	5.60142e+06	2.86664e+07	1.35391e+07	2.57002e+07	2.25918e+07	2.42213e+07	5.30346e+07	3.32177e+07	6.95833e+07
TRUE	High	Master Protein	P05165	Propionyl-CoA carboxylase alpha chain, mitochondrial OS=Homo sapiens OX=9606 GN=PCCA PE=1 SV=4	20	PCCA	7.49806e+07	7.44417e+07	1.77999e+07	1.59907e+08	4.51178e+07	7.2759e+07	2.36634e+07	3.61825e+07	3.39197e+07	6.49663e+07	2.08202e+07	9.92289e+07	2.26353e+07	1.58181e+07	4.21544e+07	5.22864e+07	3.72771e+07	2.85366e+07	6.524e+06	7.46212e+06	3.96998e+07	5.7484e+07	4.95709e+07	6.99358e+07	3.9375e+07	5.67263e+07	3.99642e+07	6.48326e+07	1.14646e+08	4.84066e+07	2.28527e+07
TRUE	High	Master Protein	O00151	PDZ and LIM domain protein 1 OS=Homo sapiens OX=9606 GN=PDLIM1 PE=1 SV=4	13	PDLIM1	6.5378e+07	4.25088e+07	1.69195e+07	2.47379e+07	3.25654e+07	5.01269e+07	3.91135e+07	1.20165e+07	1.18434e+07	1.72628e+07	8.51497e+06	9.16956e+06	3.33943e+07	8.906e+07	2.12433e+07	6.83045e+07	4.34911e+07	6.16955e+06	3.15329e+07	9.81858e+06	5.91545e+07	6.39742e+07	6.78728e+07	3.001e+07	1.27989e+07	4.49153e+07	2.12461e+07	1.12501e+08	3.03008e+07	6.33702e+07	1.18677e+08
TRUE	High	Master Protein	Q9H223	EH domain-containing protein 4 OS=Homo sapiens OX=9606 GN=EHD4 PE=1 SV=1	16	EHD4	6.54084e+07	3.76793e+07	6.78845e+07	3.66814e+07	2.72095e+07	2.98352e+07	3.7866e+07	7.58255e+07	3.03103e+07	1.6135e+07	3.13571e+07	3.65564e+07	3.689e+07	2.26852e+07	5.02794e+07	6.17192e+07	4.76589e+07	2.59524e+07	1.30119e+07	5.96138e+06	6.08401e+07	3.16649e+07	3.66867e+07	2.39489e+07	4.716e+06	1.08372e+07	1.78624e+07	1.9571e+07	1.12355e+07	1.55137e+07	7.21863e+06
TRUE	High	Master Protein	P50995	Annexin A11 OS=Homo sapiens OX=9606 GN=ANXA11 PE=1 SV=1	17	ANXA11	1.77137e+08	2.95217e+08	1.64472e+08	3.15229e+08	1.34599e+08	1.75878e+08	1.14827e+08	1.20693e+08	2.80187e+08	1.35217e+08	4.12922e+08	2.44902e+08	1.48371e+08	5.64373e+07	2.30243e+08	2.71204e+08	1.31018e+08	6.29143e+07	9.28339e+07	3.40086e+07	2.84683e+08	2.35948e+08	1.03998e+08	4.1982e+07	7.72561e+07	9.57733e+07	6.76518e+07	2.1358e+08	2.08366e+08	1.62853e+08	1.895e+08
TRUE	High	Master Protein	B1AK88	Capping protein (Actin filament) muscle Z-line, beta, isoform CRA_d OS=Homo sapiens OX=9606 GN=CAPZB PE=1 SV=1	9	CAPZB	2.48923e+08	3.76784e+08	2.62434e+08	3.60623e+08	1.81868e+08	2.28572e+08	1.72966e+08	1.49497e+08	3.67147e+08	2.88962e+08	2.13722e+08	1.92328e+08	1.79417e+08	7.11e+07	1.52982e+08	2.69925e+08	2.97086e+08	7.89715e+07	6.00806e+07	5.42824e+07	3.07253e+08	4.08068e+08	1.32724e+08	9.24049e+07	4.94797e+07	5.70504e+07	7.66378e+07	9.75016e+07	1.7084e+08	1.45339e+08	2.37935e+08
TRUE	High	Master Protein	P06756	Integrin alpha-V OS=Homo sapiens OX=9606 GN=ITGAV PE=1 SV=2	21	ITGAV	5.91504e+07	5.768e+07	1.96133e+07	8.7606e+07	4.55285e+07	7.27679e+07	5.0576e+07	2.73984e+07	6.12623e+07	7.76809e+07	5.48812e+07	3.04669e+07	1.21157e+07	2.06006e+07	3.46562e+07	8.49389e+07	2.03781e+07	9.07395e+06	3.06699e+07	5.79489e+06	5.97778e+07	8.06603e+07	7.1169e+07	4.59628e+07	1.43951e+07	1.31101e+07	3.14519e+07	3.01126e+07	4.48567e+07	5.24524e+07	3.42632e+07
TRUE	High	Master Protein	P61247	40S ribosomal protein S3a OS=Homo sapiens OX=9606 GN=RPS3A PE=1 SV=2	14	RPS3A	2.80468e+08	2.00318e+08	1.22451e+08	2.93451e+08	1.31587e+08	3.02224e+08	1.25602e+08	1.36362e+08	1.69456e+08	2.66158e+08	1.26703e+08	1.46521e+08	1.45914e+08	1.07113e+08	2.04001e+08	1.385e+08	1.1742e+08	7.75049e+07	7.34616e+07	2.41811e+07	1.35927e+08	2.53439e+08	3.65153e+08	1.07815e+08	1.07881e+08	1.29626e+08	1.21743e+08	9.41696e+07	3.1784e+08	9.58347e+07	5.14082e+08
TRUE	High	Master Protein	P29966	Myristoylated alanine-rich C-kinase substrate OS=Homo sapiens OX=9606 GN=MARCKS PE=1 SV=4	7	MARCKS	5.62879e+07	1.79011e+08	1.40624e+07	2.57305e+08	1.01377e+08	6.96417e+07	5.55256e+07	1.39004e+08	9.85284e+07	3.30788e+08	3.96484e+07	1.60677e+07	4.28039e+07	7.68553e+06	2.04847e+07	2.79277e+07	1.36289e+07	1.896e+07	1.45965e+06	3.36403e+06	1.32992e+08	2.30993e+08	1.13351e+08	1.33099e+08	7.31933e+07	7.85056e+07	1.38239e+08	4.64649e+07	5.45305e+08	6.38608e+07	5.5815e+08
TRUE	High	Master Protein	P39023	60S ribosomal protein L3 OS=Homo sapiens OX=9606 GN=RPL3 PE=1 SV=2	13	RPL3	1.14914e+08	1.40931e+08	4.6942e+07	1.59806e+08	5.76665e+07	1.6842e+08	6.74878e+07	5.41071e+07	5.52781e+07	2.23449e+08	1.89144e+07	9.71495e+07	1.07747e+07	2.06622e+07	1.91213e+08	8.53162e+07	5.55078e+07	3.59557e+07	6.39392e+06	8.83611e+06	1.70757e+08	1.40382e+08	8.66763e+07	8.3364e+07	6.48994e+07	1.37928e+08	9.53998e+07	9.5662e+07	2.97075e+08	9.38662e+07	2.5236e+08
TRUE	High	Master Protein	Q8N3E9	1-phosphatidylinositol 4,5-bisphosphate phosphodiesterase delta-3 OS=Homo sapiens OX=9606 GN=PLCD3 PE=1 SV=3	18	PLCD3	8.66718e+07	3.33345e+07	1.93519e+07	2.61796e+07	9.21147e+06	3.81786e+07	1.28598e+07	2.46104e+07	3.71242e+07	2.50157e+07	2.50218e+07	1.64736e+07	1.14262e+07	2.88209e+06	3.79959e+07	1.76115e+07	1.67387e+07	9.71119e+06	3.03718e+06	1.15268e+07	4.36732e+07	1.11769e+07	2.63085e+07	9.63467e+06	1.568e+07	4.47755e+06	4.30703e+06	3.85624e+06	1.4262e+07	4.61048e+06	5.50969e+06
TRUE	High	Master Protein	Q9NQC3	Reticulon-4 OS=Homo sapiens OX=9606 GN=RTN4 PE=1 SV=2	3	RTN4	3.23422e+08	2.58276e+08	4.89506e+07	2.53525e+08	2.27981e+08	3.92973e+08	2.0284e+08	2.5323e+08	2.19047e+08	1.37578e+08	1.33095e+08	4.78149e+07	6.50545e+07	3.07734e+07	1.11139e+08	1.12973e+08	1.14852e+08	4.95696e+07	2.2218e+07	2.27053e+07	2.6801e+08	1.09307e+08	1.36099e+08	9.10557e+06	8.09134e+07	9.73941e+07	1.07436e+08	1.05609e+08	2.23924e+08	1.03982e+08	1.76129e+08
TRUE	High	Master Protein	Q9UMS4	Pre-mRNA-processing factor 19 OS=Homo sapiens OX=9606 GN=PRPF19 PE=1 SV=1	13	PRPF19	6.24414e+07	6.79098e+07	3.81318e+07	8.26722e+07	4.61974e+07	7.75256e+07	6.41794e+07	4.8644e+07	4.67374e+07	8.66887e+07	5.49891e+07	3.5244e+07	3.63211e+07	2.98888e+07	4.98112e+07	8.22306e+07	3.94258e+07	2.48276e+07	1.85646e+07	5.49387e+06	9.83672e+07	9.35356e+07	3.56331e+07	2.09006e+07	4.24066e+07	7.88325e+07	1.37048e+07	5.76445e+07	5.59631e+07	8.21618e+07	3.4734e+07
TRUE	High	Master Protein	Q96CX2	BTB/POZ domain-containing protein KCTD12 OS=Homo sapiens OX=9606 GN=KCTD12 PE=1 SV=1	16	KCTD12	1.23711e+08	1.72855e+08	9.77435e+07	3.72105e+08	8.3828e+07	1.67171e+08	6.62465e+07	2.79029e+08	1.05687e+08	1.7964e+08	1.55161e+08	1.22964e+08	1.75394e+08	1.43338e+08	6.08728e+07	7.49208e+07	2.03726e+08	1.65468e+08	7.11707e+07	2.53196e+07	1.43914e+08	1.99217e+08	8.61267e+07	1.35435e+07	2.09571e+07	7.92056e+07	4.85094e+07	6.21221e+07	5.80639e+07	1.19268e+08	1.05568e+08
TRUE	High	Master Protein	P51665	26S proteasome non-ATPase regulatory subunit 7 OS=Homo sapiens OX=9606 GN=PSMD7 PE=1 SV=2	10	PSMD7	7.23377e+07	8.00162e+07	7.16649e+07	7.87939e+07	7.09628e+07	9.37908e+07	4.23255e+07	1.2069e+08	5.26114e+07	7.46387e+07	4.45205e+07	4.25106e+07	3.00436e+07	2.70997e+07	4.71115e+07	5.94351e+07	9.1295e+07	2.38353e+07	1.08279e+07	8.88258e+06	7.26739e+07	6.87922e+07	4.29744e+07	2.99232e+08	2.46271e+07	3.27552e+07	4.14425e+07	5.50316e+07	7.78961e+07	3.4932e+07	9.4327e+07
TRUE	High	Master Protein	Q15124	Phosphoglucomutase-like protein 5 OS=Homo sapiens OX=9606 GN=PGM5 PE=1 SV=2	19	PGM5	4.77742e+07	2.61531e+07	2.30456e+07	3.97813e+07	1.04106e+07	1.35981e+07	5.22787e+06	1.18459e+07	5.77966e+07	3.57317e+07	1.5857e+07	1.32632e+07	3.5189e+07	1.66038e+07	1.47782e+07	1.18539e+07	9.08894e+07	7.43675e+06	7.43135e+06	1.55178e+07	2.40937e+07	3.16312e+07	1.36932e+08	1.17835e+07	8.79974e+06	2.67122e+07	3.41836e+07	3.2463e+07	3.1814e+07	4.98648e+06	8.02277e+06
TRUE	High	Master Protein	P80723	Brain acid soluble protein 1 OS=Homo sapiens OX=9606 GN=BASP1 PE=1 SV=2	9	BASP1	1.1268e+08	5.60322e+07	4.39677e+07	1.25425e+08	8.09577e+07	6.44058e+07	9.35635e+07	5.60631e+07	4.66621e+07	1.80234e+08	2.02362e+07	4.75559e+07	2.15382e+07	1.77578e+07	1.64369e+07	7.46457e+07	1.61671e+07	1.3223e+07	9.41388e+06	5.89415e+06	2.82182e+07	8.65314e+07	2.75127e+06	871318	1.79227e+07	4.74577e+07	2.79923e+08	9.31639e+06	3.98573e+07	1.82397e+07	1.18575e+08
TRUE	High	Master Protein	O14818	Proteasome subunit alpha type-7 OS=Homo sapiens OX=9606 GN=PSMA7 PE=1 SV=1	12	PSMA7	1.92972e+08	2.73343e+08	1.20766e+08	3.57331e+08	2.50606e+08	1.89329e+08	1.81693e+08	1.94344e+08	2.46458e+08	3.25891e+08	1.26293e+08	2.24355e+08	1.23132e+08	5.89537e+07	2.03004e+08	1.98239e+08	8.00484e+07	6.66646e+07	2.95998e+07	9.05481e+07	1.61328e+08	2.5216e+08	7.14704e+07	4.03128e+07	1.79687e+08	1.31578e+08	7.23144e+07	1.23833e+08	3.91421e+08	1.9054e+08	1.64345e+08
TRUE	High	Master Protein	Q15046	Lysine--tRNA ligase OS=Homo sapiens OX=9606 GN=KARS PE=1 SV=3	16	KARS	7.13415e+07	7.5343e+07	3.70161e+07	7.35605e+07	3.48244e+07	6.50709e+07	2.40802e+07	2.88511e+07	3.42492e+07	4.38167e+07	3.70177e+07	4.98828e+07	6.32103e+07	2.09673e+07	6.00224e+07	4.53591e+07	3.28947e+07	3.34926e+07	1.69347e+07	3.8286e+07	8.27404e+07	3.86125e+07	1.11285e+07	2.90398e+07	4.22537e+07	3.47133e+07	1.16428e+07	1.47364e+07	6.822e+07	1.56544e+07	5.18164e+07
TRUE	High	Master Protein	Q15020	Squamous cell carcinoma antigen recognized by T-cells 3 OS=Homo sapiens OX=9606 GN=SART3 PE=1 SV=1	15	SART3	3.37149e+07	4.35486e+07	1.67774e+07	4.65084e+07	2.01822e+07	4.00987e+07	1.01478e+07	1.68678e+07	1.29237e+07	3.21258e+07	2.13752e+07	2.73043e+07	1.12276e+07	3.08567e+06	1.52069e+07	4.55068e+07	1.25407e+07	9.77141e+06	1.43001e+07	7.62424e+06	4.11731e+07	3.27355e+07	3.36519e+07	8.86215e+06	2.15922e+07	3.26148e+07	2.86069e+07	1.4369e+07	2.92408e+07	2.05486e+07	2.91749e+07
TRUE	High	Master Protein	A0A0A0MRM8	Unconventional myosin-VI OS=Homo sapiens OX=9606 GN=MYO6 PE=1 SV=1	3	MYO6	1.3945e+06	4.7385e+06	5.60684e+06	6.12306e+06	1.24431e+06	1.95155e+06	9.01122e+06	6.87429e+06	5.16929e+06	3.65466e+06	4.8025e+06	2.39044e+06	1.15818e+06	822692	2.08475e+06	4.84478e+06	6.76107e+06	8.09458e+06	1.54e+06	811078	882563	1.1164e+06	311117	333544	1.71768e+06	1.52384e+06	3.84474e+06	3.04941e+06	510997	2.20831e+06	281467
TRUE	High	Master Protein	A8K968	Band 4.1-like protein 3 OS=Homo sapiens OX=9606 GN=EPB41L3 PE=1 SV=1	6	EPB41L3	2.44209e+06	936481	1.18821e+06	6.90869e+06	1.41615e+06	2.74226e+06	4.68629e+06	4.94824e+06	3.15986e+06	4.39428e+06	705044	1.84554e+06	2.26564e+06	6.13665e+06	2.31212e+06	2.2841e+07	1.27561e+07	2.0719e+06	2.60807e+06	2.41498e+06	6.7836e+06	1.76491e+06	5.42057e+06	1.87892e+06	1.42431e+06	4.18414e+06	1.54923e+07	8.84649e+06	2.32144e+06	2.92172e+06	762085
TRUE	High	Master Protein	P40925	Malate dehydrogenase, cytoplasmic OS=Homo sapiens OX=9606 GN=MDH1 PE=1 SV=4	14	MDH1	2.64636e+08	5.06129e+08	3.14924e+08	6.53891e+08	5.92976e+08	3.05901e+08	2.68585e+08	2.3807e+08	4.25779e+08	2.63262e+08	2.74229e+08	2.76265e+08	2.82261e+08	1.1974e+08	3.55007e+08	7.10583e+08	4.64064e+08	2.74304e+08	1.00675e+08	8.90889e+07	5.04509e+08	5.18464e+08	1.16591e+08	4.10233e+07	1.53417e+08	2.32973e+08	5.66559e+08	2.16637e+08	4.22843e+08	1.87308e+08	3.81085e+08
TRUE	High	Master Protein	O95573	Long-chain-fatty-acid--CoA ligase 3 OS=Homo sapiens OX=9606 GN=ACSL3 PE=1 SV=3	18	ACSL3	3.63878e+07	6.68329e+07	1.39965e+07	9.30738e+07	3.71074e+07	9.48288e+07	7.87651e+07	7.05727e+07	2.44749e+07	5.30282e+07	2.40748e+07	4.38072e+07	1.51116e+07	8.78091e+06	4.15368e+07	5.70307e+07	2.37518e+07	9.76652e+06	7.20023e+06	6.35068e+06	5.52994e+07	3.82525e+07	2.52101e+07	1.02429e+08	7.24205e+07	6.25115e+07	3.31695e+07	3.00989e+07	6.76756e+07	1.41506e+08	1.3686e+07
TRUE	High	Master Protein	P78347	General transcription factor II-I OS=Homo sapiens OX=9606 GN=GTF2I PE=1 SV=2	22	GTF2I	7.6075e+07	6.83894e+07	3.24482e+07	6.61641e+07	3.12641e+07	5.088e+07	1.78826e+07	2.30859e+07	4.97672e+07	4.40377e+07	7.40193e+07	3.26225e+07	2.90248e+07	2.77402e+06	4.70158e+07	5.19089e+07	1.30549e+07	1.78241e+07	5.09865e+06	7.61349e+06	1.47912e+08	2.89509e+07	8.83744e+07	1.17688e+07	1.37505e+07	8.81566e+06	1.02532e+07	7.81117e+06	4.99874e+07	2.68714e+07	1.81398e+07
TRUE	High	Master Protein	P16188	HLA class I histocompatibility antigen, A-30 alpha chain OS=Homo sapiens OX=9606 GN=HLA-A PE=1 SV=2	1	HLA-A	125158	129728	795297	105402	98349	197380	33538.2	7.93918e+06	32195.2	201617	150265	167481	106959	121046	152134	61044.3	147238	122965	11265.6	41733.8	56424.8	194570	82746.6	173987	61299.7	191618	200681	130645	213796	189880	199108
TRUE	High	Master Protein	P84077	ADP-ribosylation factor 1 OS=Homo sapiens OX=9606 GN=ARF1 PE=1 SV=2	9	ARF1	2.70322e+08	2.27392e+08	1.33745e+08	3.36116e+08	1.61018e+08	1.73312e+08	9.67107e+07	1.07517e+08	1.62543e+08	2.60954e+08	1.26383e+08	1.4239e+08	9.81615e+07	4.93585e+07	1.77492e+08	2.39359e+08	1.74317e+08	9.9412e+07	5.12361e+07	5.0897e+07	2.02466e+08	1.75577e+08	3.76159e+08	3.08422e+07	8.02019e+07	1.07531e+08	2.08611e+08	9.12072e+07	2.33391e+08	1.80232e+08	3.35786e+08
TRUE	High	Master Protein	P14317	Hematopoietic lineage cell-specific protein OS=Homo sapiens OX=9606 GN=HCLS1 PE=1 SV=3	14	HCLS1	9.08366e+07	4.30293e+07	2.31926e+07	2.61934e+08	4.86943e+07	1.1849e+08	2.21689e+07	3.78066e+07	7.27783e+07	2.09368e+08	1.7826e+07	2.12717e+07	3.95544e+07	2.26752e+07	1.57219e+07	5.09652e+07	6.26366e+07	1.76431e+07	1.46875e+07	2.24654e+06	4.37096e+07	1.5062e+08	9.8647e+06	1.53488e+07	3.15921e+07	4.97717e+07	5.41319e+07	7.44116e+07	2.78019e+07	5.05854e+07	1.28005e+08
TRUE	High	Master Protein	Q08380	Galectin-3-binding protein OS=Homo sapiens OX=9606 GN=LGALS3BP PE=1 SV=1	12	LGALS3BP	1.52852e+08	6.23618e+07	5.17308e+07	9.02641e+07	5.78406e+07	2.20743e+08	8.32981e+07	6.47387e+07	1.33335e+08	1.54034e+08	1.22819e+08	6.00734e+07	1.11844e+08	4.64792e+07	1.02754e+08	7.87115e+07	3.08198e+07	5.4347e+07	3.31604e+07	2.71143e+07	1.24693e+08	1.1716e+08	1.1643e+08	2.6352e+07	3.21854e+07	4.9423e+07	6.25131e+07	8.11963e+07	1.18136e+08	2.20606e+08	1.17788e+08
TRUE	High	Master Protein	Q6UXI9	Nephronectin OS=Homo sapiens OX=9606 GN=NPNT PE=2 SV=3	5	NPNT	3.84563e+07	2.14382e+07	2.1987e+08	1.10101e+08	1.27017e+07	3.68494e+08	4.76742e+07	8.27264e+06	3.98203e+07	1.91642e+08	2.19216e+07	2.62638e+07	2.44019e+07	1.5243e+07	1.2758e+08	4.9243e+07	7.04957e+07	1.56114e+07	6.84145e+06	4.98529e+07	3.22618e+08	1.76546e+08	1.31958e+08	5.11804e+07	2.48355e+07	1.83015e+07	1.15809e+07	2.04178e+07	4.1481e+07	3.52026e+07	3.8794e+07
TRUE	High	Master Protein	P08571	Monocyte differentiation antigen CD14 OS=Homo sapiens OX=9606 GN=CD14 PE=1 SV=2	11	CD14	9.22002e+07	5.54404e+07	6.2068e+07	1.90775e+08	3.42254e+07	1.46915e+08	5.27089e+07	3.36535e+07	4.09956e+07	1.25506e+08	4.94425e+07	4.56333e+07	3.09897e+07	7.63042e+07	4.84201e+07	8.70998e+07	3.82769e+07	4.6697e+07	8.62466e+07	1.41687e+07	7.29969e+07	1.23931e+08	5.52232e+07	2.33667e+07	2.10236e+08	7.54876e+07	7.56317e+06	7.93292e+07	3.27182e+07	6.50117e+07	6.60718e+07
TRUE	High	Master Protein	P05107	Integrin beta-2 OS=Homo sapiens OX=9606 GN=ITGB2 PE=1 SV=2	3	ITGB2	5.02824e+07	5.09423e+07	5.92553e+07	2.1067e+08	4.91163e+07	5.65281e+07	9.28007e+06	1.19754e+08	5.54128e+07	1.48155e+08	7.54127e+07	1.62632e+08	2.60021e+07	2.79605e+07	8.28381e+07	5.4276e+07	1.15281e+08	1.79322e+07	2.30271e+07	1.05783e+07	4.79141e+07	1.40723e+08	9.94205e+07	1.71191e+07	2.36677e+07	2.33012e+07	3.06647e+07	2.93511e+07	1.27002e+07	8.8717e+07	4.30906e+07
TRUE	High	Master Protein	P53985	Monocarboxylate transporter 1 OS=Homo sapiens OX=9606 GN=SLC16A1 PE=1 SV=3	9	SLC16A1	6.1231e+07	2.43728e+07	1.72064e+07	1.03096e+08	4.01164e+07	4.96807e+07	2.9953e+08	1.10903e+09	1.27536e+08	4.39632e+07	5.27904e+07	4.7283e+07	2.75335e+07	6.28456e+06	3.01149e+07	2.70942e+07	1.20511e+07	9.78774e+06	4.53666e+06	4.58721e+06	8.34643e+07	4.34143e+07	3.01581e+07	1.96736e+07	2.70352e+07	3.19793e+07	3.20075e+07	2.84165e+07	3.59734e+07	3.88208e+07	4.30212e+06
TRUE	High	Master Protein	Q3LXA3	Triokinase/FMN cyclase OS=Homo sapiens OX=9606 GN=TKFC PE=1 SV=2	17	DAK; TKFC	3.89039e+07	2.15727e+07	4.19307e+07	4.14126e+07	2.97854e+07	2.25573e+07	1.52842e+07	1.83702e+07	3.72305e+07	1.97918e+07	1.99302e+07	2.80262e+07	1.02009e+08	9.92199e+06	6.6309e+07	3.28193e+07	8.06729e+06	8.44845e+06	9.83093e+06	1.01497e+07	2.87127e+07	4.11101e+07	1.18864e+08	9.55343e+07	8.13057e+06	1.37564e+07	1.1275e+07	1.08326e+07	5.99887e+07	3.03925e+07	3.55013e+07
TRUE	High	Master Protein	Q15459	Splicing factor 3A subunit 1 OS=Homo sapiens OX=9606 GN=SF3A1 PE=1 SV=1	20	SF3A1	7.83986e+07	8.56875e+07	2.64028e+07	1.02294e+08	7.05012e+07	6.79276e+07	3.94424e+07	3.43749e+07	8.0542e+07	8.06528e+07	5.63195e+07	4.35061e+07	3.97695e+07	3.08972e+07	7.14102e+07	8.04708e+07	3.4135e+07	1.5066e+07	6.62124e+07	1.46631e+07	9.81756e+07	5.17848e+07	7.4875e+07	5.52337e+07	4.71738e+07	6.19761e+07	2.0852e+08	9.50764e+07	1.15403e+08	6.22364e+07	2.087e+08
TRUE	High	Master Protein	P04004	Vitronectin OS=Homo sapiens OX=9606 GN=VTN PE=1 SV=1	16	VTN	1.42133e+08	6.38686e+07	5.5141e+08	6.57557e+07	9.65337e+07	2.43265e+08	1.3304e+08	1.8593e+08	4.7994e+07	1.1857e+08	2.26235e+08	1.02975e+08	2.10833e+08	8.39889e+08	1.97148e+08	8.50186e+07	2.46935e+08	4.36588e+08	7.42787e+08	3.81993e+08	1.03769e+08	9.63795e+07	1.5088e+08	2.60626e+07	2.91421e+08	1.8413e+08	1.13805e+08	2.53071e+08	6.88555e+07	2.00688e+08	4.15152e+07
TRUE	High	Master Protein	Q9UNM6	26S proteasome non-ATPase regulatory subunit 13 OS=Homo sapiens OX=9606 GN=PSMD13 PE=1 SV=2	16	PSMD13	5.49535e+07	4.87997e+07	4.14133e+07	6.73946e+07	8.72992e+07	3.06652e+07	3.08423e+07	3.04961e+07	5.68678e+07	3.79013e+07	8.53043e+07	9.08006e+07	6.92518e+07	1.53985e+07	1.23514e+08	6.98997e+07	2.01675e+07	5.01778e+07	1.26675e+07	1.59121e+07	1.37183e+08	4.17488e+07	8.86536e+07	4.72026e+07	4.66908e+07	7.64529e+07	5.89585e+06	4.67397e+07	1.13506e+08	8.24181e+07	1.4636e+08
TRUE	High	Master Protein	P48681	Nestin OS=Homo sapiens OX=9606 GN=NES PE=1 SV=2	18	NES	4.34242e+07	9.21173e+06	1.5382e+07	1.04981e+07	3.95579e+07	1.97034e+07	9.66408e+06	9.00635e+06	5.94586e+06	1.12542e+07	1.1322e+07	1.32331e+07	3.06308e+07	1.3132e+07	1.68131e+07	3.90815e+07	1.72451e+07	5.41198e+07	2.44975e+07	1.19583e+07	2.50242e+07	1.10837e+07	8.16867e+06	3.36438e+07	1.7737e+07	3.71884e+07	1.41305e+07	4.57551e+07	3.62326e+07	1.70955e+07	2.65919e+07
TRUE	High	Master Protein	P52306	Rap1 GTPase-GDP dissociation stimulator 1 OS=Homo sapiens OX=9606 GN=RAP1GDS1 PE=1 SV=3	18	RAP1GDS1	4.20301e+07	2.07268e+07	2.02378e+07	2.86643e+07	1.69901e+07	2.32221e+07	1.70292e+07	1.17978e+07	1.93354e+07	2.14442e+07	2.73968e+07	2.16987e+07	8.16252e+06	1.34037e+07	3.17508e+07	4.86639e+07	1.37532e+08	8.6265e+06	5.04607e+06	3.08985e+06	1.43386e+08	5.91718e+07	3.76334e+07	3.53107e+07	7.58115e+06	5.14794e+07	1.19019e+08	1.96915e+07	5.59217e+07	2.33758e+07	3.13778e+07
TRUE	High	Master Protein	Q9Y6R7	IgGFc-binding protein OS=Homo sapiens OX=9606 GN=FCGBP PE=1 SV=3	16	FCGBP	5.06085e+07	5.67754e+06	7.3768e+06	1.00441e+07	2.04587e+06	1.24255e+07	6.25258e+07	5.43672e+06	6.17968e+06	1.14153e+07	2.95841e+06	3.74528e+06	8.81352e+06	7.5082e+06	1.27666e+07	1.58702e+07	6.66542e+06	8.68368e+06	1.69198e+07	2.55818e+06	5.66931e+07	6.96879e+06	6.38826e+06	1.24793e+06	2.50482e+06	7.08981e+06	7.65796e+06	2.18256e+07	8.10768e+06	5.91406e+07	2.41073e+06
TRUE	High	Master Protein	P01891	HLA class I histocompatibility antigen, A-68 alpha chain OS=Homo sapiens OX=9606 GN=HLA-A PE=1 SV=4	3	HLA-A	1.22506e+06	1.04423e+06	302103	3.0817e+06	1.59032e+07	1.99381e+06	738703	1.01914e+06	453039	382859	2.95709e+07	720412	2.14435e+06	427821	273303	701816	1.11187e+06	3.50892e+06	422653	899367	2.6017e+06	667938	449482	641728	472651	633389	322116	412382	3.0256e+06	520395	6.11827e+06
TRUE	High	Master Protein	P20591	Interferon-induced GTP-binding protein Mx1 OS=Homo sapiens OX=9606 GN=MX1 PE=1 SV=4	13	MX1	3.93713e+07	6.8264e+07	7.78505e+07	3.38146e+07	9.02308e+07	7.16443e+06	2.44372e+07	2.16775e+07	2.4243e+07	2.86955e+07	1.92942e+08	1.51663e+07	4.76183e+07	2.11587e+07	2.71204e+07	3.13682e+07	2.14669e+07	2.93486e+07	2.94779e+07	5.16227e+06	2.45114e+08	2.80311e+07	4.96073e+07	9.73505e+07	1.09468e+07	3.05841e+07	3.38252e+07	1.48094e+07	3.24631e+07	2.50257e+07	1.49333e+07
TRUE	High	Master Protein	P46063	ATP-dependent DNA helicase Q1 OS=Homo sapiens OX=9606 GN=RECQL PE=1 SV=3	15	RECQL	7.4087e+07	5.28334e+07	2.48231e+07	5.50222e+07	4.84637e+07	7.82834e+07	1.63085e+07	1.82506e+07	2.0452e+07	4.52624e+07	4.33847e+07	2.88077e+07	1.87205e+07	9.46407e+06	4.02136e+07	6.0815e+07	3.41273e+07	1.4646e+07	6.59213e+06	1.14344e+07	6.81229e+07	8.07448e+07	3.97504e+07	5.04316e+07	8.79803e+06	1.0619e+07	4.1162e+07	1.03634e+07	2.38204e+07	1.8156e+07	7.38504e+07
TRUE	High	Master Protein	O15523	ATP-dependent RNA helicase DDX3Y OS=Homo sapiens OX=9606 GN=DDX3Y PE=1 SV=2	2	DDX3Y	322946	120989	161299	3.69186e+06	2.29898e+06	92812.1	2.62482e+06	103012	317314	445708	347578	526357	1.14751e+06	133879	576018	1.24801e+06	450889	392638	290560	257946	914300	1.96841e+06	242473	337587	312063	106991	219795	299008	267961	255657	240316
TRUE	High	Master Protein	Q9BZQ8	Protein Niban OS=Homo sapiens OX=9606 GN=FAM129A PE=1 SV=1	17	FAM129A	2.08344e+07	2.67648e+07	1.58802e+07	1.19305e+08	1.00336e+07	2.2016e+07	1.6589e+07	1.41539e+07	1.07121e+07	1.59178e+07	1.30374e+07	1.33778e+07	1.69525e+07	1.18651e+07	1.97365e+07	1.41746e+07	2.50161e+07	1.23191e+07	1.06753e+07	2.65391e+06	4.62397e+07	1.19751e+07	2.04388e+07	3.41642e+07	4.55769e+06	1.48413e+07	1.78005e+07	1.64966e+07	1.94122e+07	1.48239e+07	4.33854e+07
TRUE	High	Master Protein	O60313	Dynamin-like 120 kDa protein, mitochondrial OS=Homo sapiens OX=9606 GN=OPA1 PE=1 SV=3	20	OPA1	7.28429e+07	7.29206e+07	4.24416e+07	7.39988e+07	2.95266e+07	5.87112e+07	3.48334e+07	2.78507e+07	2.91562e+07	6.00844e+07	3.97433e+07	1.99155e+07	2.42288e+07	1.13852e+08	2.46028e+07	4.16472e+07	7.68969e+07	1.60492e+07	8.73872e+07	4.82016e+07	5.83882e+07	5.81446e+07	1.32588e+08	8.02512e+06	4.64064e+07	6.48858e+07	6.52528e+07	3.0656e+07	2.81762e+07	5.28663e+07	4.24533e+07
TRUE	High	Master Protein	Q14314	Fibroleukin OS=Homo sapiens OX=9606 GN=FGL2 PE=1 SV=1	14	FGL2	4.97478e+07	1.4046e+07	3.03002e+07	3.2792e+07	6.81961e+06	1.01441e+08	1.0534e+07	1.10101e+07	2.12109e+07	4.45284e+07	1.86924e+07	1.93992e+07	1.36078e+08	6.24652e+07	6.52052e+07	1.00578e+07	3.09975e+07	5.79911e+07	2.28699e+07	3.03074e+07	2.80967e+08	3.39456e+07	2.16269e+07	5.43031e+07	4.3837e+06	8.15579e+06	3.20398e+06	1.87088e+07	1.92005e+07	9.86051e+06	3.83308e+06
TRUE	High	Master Protein	Q16401	26S proteasome non-ATPase regulatory subunit 5 OS=Homo sapiens OX=9606 GN=PSMD5 PE=1 SV=3	16	PSMD5	6.32781e+07	6.34428e+07	5.58862e+07	9.72254e+07	4.01167e+07	4.83435e+07	2.42666e+07	2.37822e+07	5.8476e+07	7.3754e+07	6.25097e+07	6.96656e+07	4.81972e+07	1.45587e+07	8.71952e+08	7.51053e+08	3.1329e+07	4.82704e+08	1.42906e+07	1.29722e+07	1.42957e+09	5.11791e+07	8.11023e+07	5.74903e+07	4.94699e+07	4.71416e+07	4.09384e+09	4.03203e+07	6.78444e+07	3.73793e+07	3.19333e+07
TRUE	High	Master Protein	P78417	Glutathione S-transferase omega-1 OS=Homo sapiens OX=9606 GN=GSTO1 PE=1 SV=2	17	GSTO1	1.86307e+08	1.35859e+08	1.43292e+08	3.49261e+08	1.40586e+08	2.20197e+08	2.82621e+08	1.87178e+08	2.46164e+08	2.99243e+08	2.07277e+08	1.829e+08	1.26963e+08	6.32193e+07	1.15333e+08	1.9972e+08	1.32213e+08	1.39081e+08	1.48814e+08	4.43489e+07	1.84572e+08	2.1108e+08	1.53424e+08	1.70655e+07	1.78268e+08	8.17207e+07	2.24941e+08	2.19066e+08	3.50298e+08	1.51652e+08	2.50276e+08
TRUE	High	Master Protein	Q9UH99	SUN domain-containing protein 2 OS=Homo sapiens OX=9606 GN=SUN2 PE=1 SV=3	13	SUN2	5.38929e+07	2.62512e+07	1.47314e+07	2.42889e+07	3.28577e+07	5.35403e+07	3.19501e+07	1.85108e+07	1.18765e+07	2.62873e+07	3.69441e+07	2.65118e+07	1.05937e+07	4.81459e+06	1.59901e+07	1.3521e+07	1.67004e+07	1.1333e+07	1.40797e+06	1.47201e+06	4.51502e+06	5.92549e+07	2.09388e+07	3.84961e+08	5.05346e+06	3.7196e+06	4.50646e+06	6.61151e+06	9.51945e+06	3.61177e+06	1.07819e+07
TRUE	High	Master Protein	P11177	Pyruvate dehydrogenase E1 component subunit beta, mitochondrial OS=Homo sapiens OX=9606 GN=PDHB PE=1 SV=3	15	PDHB	9.9803e+07	1.12967e+08	4.49719e+07	1.47066e+08	3.47009e+07	1.14876e+08	4.14799e+07	7.7108e+07	2.99113e+07	1.29486e+08	7.18271e+07	8.69773e+07	6.89339e+07	5.04287e+07	1.08249e+08	1.34366e+08	9.19078e+07	5.43186e+07	3.90493e+07	4.56994e+06	1.51657e+08	8.72301e+07	1.07477e+08	1.43963e+07	4.49734e+07	1.79936e+08	1.24765e+08	1.27312e+08	1.23081e+08	7.41876e+07	8.20779e+07
TRUE	High	Master Protein	Q93009	Ubiquitin carboxyl-terminal hydrolase 7 OS=Homo sapiens OX=9606 GN=USP7 PE=1 SV=2	21	USP7	5.15119e+07	3.47459e+07	2.19089e+07	3.4999e+07	3.08038e+07	5.60612e+07	1.85556e+07	1.65819e+07	3.01379e+07	3.13269e+07	2.53914e+07	1.54815e+07	1.46799e+07	2.46402e+07	3.50308e+07	3.97446e+07	2.48027e+07	1.06229e+07	8.32633e+06	7.67516e+06	6.89376e+07	3.51157e+07	9.70256e+07	2.99845e+08	1.4612e+07	1.84587e+07	3.31913e+07	6.21806e+06	1.57837e+07	1.03757e+07	2.15192e+07
TRUE	High	Master Protein	Q96HF1	Secreted frizzled-related protein 2 OS=Homo sapiens OX=9606 GN=SFRP2 PE=1 SV=2	11	SFRP2	1.4226e+08	2.28976e+06	1.59557e+07	1.19675e+07	5.25271e+06	1.68796e+07	1.89403e+06	1.21992e+07	5.8537e+06	1.24251e+07	4.11617e+06	4.5959e+06	1.23873e+07	3.37034e+07	3.07629e+07	1.09852e+07	9.00713e+07	2.61838e+07	3.02179e+07	1.55832e+07	4.10365e+08	1.58488e+07	1.34506e+06	1.58679e+06	1.33062e+06	2.5056e+06	1.88101e+06	1.8798e+06	2.20016e+06	1.53805e+06	1.41208e+06
TRUE	High	Master Protein	Q5VTI5	Pleckstrin homology domain-containing family A member 6 OS=Homo sapiens OX=9606 GN=PLEKHA6 PE=1 SV=1	7	PLEKHA6	4.78561e+06	4.21663e+06	2.05834e+06	1.02263e+07	5.70193e+06	2.8371e+06	6.35931e+06	3.2736e+06	6.98832e+06	7.69548e+06	4.9724e+06	3.68665e+06	4.18739e+06	814901	2.0496e+06	5.95854e+06	662911	4.32996e+06	789723	1.03221e+06	853791	942519	614749	848757	800449	2.18563e+06	604522	679120	8.12435e+06	2.24711e+06	8.63082e+06
TRUE	High	Master Protein	Q7L775	EPM2A-interacting protein 1 OS=Homo sapiens OX=9606 GN=EPM2AIP1 PE=1 SV=1	16	EPM2AIP1	3.30785e+07	4.37658e+07	2.03035e+07	6.70598e+07	3.38105e+07	2.74574e+07	1.52178e+07	2.6561e+07	4.16968e+07	4.21488e+07	3.96349e+07	7.25392e+06	8.21197e+06	8.7318e+06	1.80715e+07	3.16722e+07	1.88352e+07	1.13312e+07	1.02393e+07	1.79965e+07	3.22132e+07	1.69984e+07	2.88633e+07	7.1183e+07	1.19657e+07	1.00987e+07	4.31308e+06	6.81787e+06	1.25745e+07	1.91985e+06	1.12087e+08
TRUE	High	Master Protein	P62826	GTP-binding nuclear protein Ran OS=Homo sapiens OX=9606 GN=RAN PE=1 SV=3	11	RAN	3.29396e+08	3.49852e+08	2.22782e+08	5.59948e+08	1.7546e+08	4.40001e+08	2.51501e+08	2.99215e+08	3.92593e+08	3.83626e+08	2.3291e+08	3.41934e+08	3.22428e+08	1.76921e+08	4.79066e+08	5.72758e+08	2.22852e+08	2.15524e+08	1.39231e+08	1.16573e+08	4.1497e+08	2.89816e+08	4.19756e+08	2.98056e+08	3.2072e+08	2.33472e+08	2.12496e+08	2.05897e+08	4.77991e+08	3.89449e+08	4.05108e+08
TRUE	High	Master Protein	P0DJI8	Serum amyloid A-1 protein OS=Homo sapiens OX=9606 GN=SAA1 PE=1 SV=1	7	SAA1	6.19665e+07	1.19993e+07	2.56459e+07	1.04734e+07	1.09549e+07	1.73846e+07	1.15779e+07	9.28324e+06	1.39734e+07	1.88462e+07	1.79933e+07	1.01021e+08	3.45714e+07	3.13735e+09	4.22868e+07	4.85738e+07	2.79261e+06	7.05487e+07	3.38574e+09	3.38464e+06	2.992e+07	1.32878e+07	1.25415e+06	5.97089e+07	1.84304e+06	1.22172e+08	1.74653e+07	1.58318e+08	1.30542e+07	7.24977e+07	1.09066e+06
TRUE	High	Master Protein	P50225	Sulfotransferase 1A1 OS=Homo sapiens OX=9606 GN=SULT1A1 PE=1 SV=3	8	SULT1A1	7.41901e+07	1.26069e+08	5.578e+07	2.34538e+08	9.44045e+07	1.54825e+08	3.91048e+07	1.19765e+08	1.62848e+08	1.62121e+08	8.04645e+07	5.06023e+07	5.04159e+07	3.64751e+07	7.35769e+07	5.29357e+07	1.41766e+08	2.2039e+07	4.20291e+07	2.00933e+07	1.89701e+08	1.46423e+08	1.33483e+08	7.84395e+07	1.02975e+08	2.26129e+08	1.74248e+08	2.54819e+08	3.52027e+08	2.08743e+08	5.34812e+08
TRUE	High	Master Protein	Q9ULA0	Aspartyl aminopeptidase OS=Homo sapiens OX=9606 GN=DNPEP PE=1 SV=1	15	DNPEP	5.73803e+07	4.54169e+07	9.35991e+06	7.07383e+07	1.97445e+07	5.62083e+07	1.90329e+07	1.35541e+07	1.29745e+07	4.45542e+07	1.44052e+07	2.3753e+07	5.98305e+07	1.32023e+07	6.77278e+07	5.91916e+07	3.41007e+07	2.62809e+07	1.0883e+07	7.80718e+06	5.54023e+07	6.46797e+07	3.77206e+07	6.49448e+06	9.96213e+06	4.73457e+07	2.27211e+07	3.84829e+07	6.42934e+07	6.36685e+07	1.27633e+07
[truncated: 4,791 more rows]

## Sheet: iTRAQ_PMID_25413884
PMID_25413884: Comparison between LFQ (current study) and iTRAQ data (Previous study)
[truncated: 3,653 more rows]

## Sheet: COMPARISON OF LAB DATASETS
184 common elements in "LFQ", "ITRAQ*" and "PHOSPHO":						1022 common elements in "LFQ" and "ITRAQ*":					601 common elements in "LFQ" and "PHOSPHO":
[truncated: 1,022 more rows]

[truncated: 8 more sheets: Papaioannou et al. dataset, OVERLAPS, OVERALL HM_SM, SM PHP PROTEINS, Phosphoproteins_HM et al., PHP OVERALPS, Table S3A , COMMON IRAQ LFQ PROTEINS]
