# Supplementary material for: Comprehending Meningioma Signaling Cascades Using Multipronged Proteomics Approaches & Targeted Validation of Potential Markers
Source: Front Oncol. 2020 Aug 26;10:1600. doi: 10.3389/fonc.2020.01600 (PMC7482667; doi:10.3389/fonc.2020.01600)
Supplement: Supplementary file 8 [file Table_8.xlsx]

## Sheet: Cytoskeletal regulators
	DMSO 24h	DMSO 24h	DMSO 24h	CPD22 24h	CPD22 24h	CPD22 24h
Position	Control Group	Control Group	Control Group	Test Group 1	Test Group 1	Test Group 1
A01	23.7	26.29	26.96	24.38	27.51	27.22
A02	23.67	26.3	26.85	23.97	27.14	26.95
A03	28.29	28.98	30.08	28.28	29.79	29.75
A04	27.21	29.41	30.47	27.44	30.63	30.71
A05	37.01	39.08	37.37	37.01	36.52	38.65
A06	29.18	30.7	31.43	29.53	31.73	32
A07	30.01	32.52	33.36	30.22	33.44	33.26
A08	24.88	27.06	28.05	24.76	28.12	27.86
A09	22.42	24.58	24.87	22.38	25.25	25.05
A10	23.05	25.15	25.44	23.17	25.71	25.59
A11	25.46	28.05	29.07	25.83	29.33	29.1
A12	22.97	24.96	25.45	23.13	26.03	25.65
B01	27.8	28.34	29.41	28.62	29.66	29.8
B02	30.22	30.01	30.97	31.2	32.11	31.7
B03	31.66	32.77	33.41	32.07	33.73	33.78
B04	30.07	30.83	30.99	30.35	31.84	32.06
B05	22.11	24.35	25.23	22.85	25.52	25.71
B06	24.94	26.73	27.08	25.23	27.95	27.56
B07	28.24	30.44	30.69	28.67	31.31	31.33
B08	34.62	35.4	35.03	N/A	36.33	34.78
B09	28.74	29.3	30.04	30.64	31.16	30.79
B10	23.99	26.58	27.08	24.2	27.47	27.39
B11	25.4	28.02	28.71	25.96	28.84	28.91
B12	26.7	28.94	29.97	27.27	30.46	30.22
C01	25.28	27.29	27.87	25.67	27.91	27.78
C02	27.7	29.29	30.14	27.49	30.23	30.07
C03	32.3	33.23	34	32.69	34.12	34.28
C04	21.76	24.28	25.1	22.14	25.53	25.34
C05	32.87	33.68	34.89	33.98	36.32	36.08
C06	27.27	29.83	30.3	27.85	30.39	30.46
C07	27.21	29.54	30.4	27.49	30.59	30.71
C08	25.15	27.7	28.44	25.43	28.46	28.69
C09	29.08	30.62	31.49	29.16	31.58	31.55
C10	25.29	27.88	28.65	25.71	28.82	29
C11	25.21	28.12	28.88	25.4	28.78	28.77
C12	25.95	28.5	29.07	26.23	29.69	29.42
D01	29.28	31.24	31.62	29.92	31.76	31.85
D02	29.01	31.7	32.9	29.35	32.99	33.12
D03	22.08	24	24.5	22.55	24.87	24.87
D04	27.03	29.52	30.31	27.22	30.47	30.21
D05	29.4	31.86	32.66	30.2	32.9	33.52
D06	31.41	31.06	31.65	32.13	31.67	31.71
D07	24.41	26.22	26.74	24.77	27.14	26.9
D08	24.15	26.83	27.51	24.36	27.62	27.47
D09	32.22	33.08	33.28	33.21	33.44	33.47
D10	27.01	29.44	30.17	27.25	29.98	30.06
D11	28.91	31.14	32.27	29.39	31.96	32.34
D12	29.72	32.64	33.36	30.13	33.2	33.37
E01	24.24	26.57	27.26	24.49	27.6	27.26
E02	29.12	32.44	33.64	29.5	33.36	34.56
E03	23.24	25.77	26.56	23.68	26.75	26.52
E04	30.49	30.8	31.49	29.43	31.04	30.82
E05	24.8	27.61	28.26	25.15	28.74	28.53
E06	26.36	28.22	28.99	26.6	29.02	28.88
E07	32.07	33.66	34.88	32.25	36.01	34.82
E08	27.62	29.18	30.19	28.38	29.98	30.17
E09	27.28	29.26	30.02	28.34	30.46	30.58
E10	23.96	26.94	27.41	24.05	28.08	27.88
E11	29.15	28.36	29.26	28.05	29.68	29.47
E12	33.53	35.88	35.83	34.07	36.24	36.04
F01	26.58	29.08	30.04	26.77	29.99	29.98
F02	29.67	31.87	32.81	29.68	32.68	33.14
F03	28.1	29.96	30.74	28.44	30.89	30.85
F04	28.64	30.9	31.95	29.22	32.28	32.17
F05	24.2	25.88	26.27	24.63	26.66	26.6
F06	26.8	28.67	29.38	27.27	29.85	29.46
F07	27.09	29.19	30.5	27.54	30.06	30.1
F08	25.75	27.98	28.77	26.51	28.85	28.79
F09	30.41	32.05	33.15	31	33.26	33.12
F10	26.08	29.38	30.21	26.91	30.55	30.19
F11	26.17	28.91	29.6	26.58	29.88	29.8
F12	23.6	25.73	26.28	24.01	26.54	26.4
G01	27.28	28.6	29.6	28.45	30.11	30.22
G02	25.86	28.68	29.58	26.59	29.75	29.89
G03	22.26	23.9	24.14	22.56	24.82	24.64
G04	25.45	28.08	28.79	25.98	29.14	28.91
G05	27.91	30.14	31.2	28.55	31.38	31.22
G06	30.08	32.01	32.65	30.34	32.61	33.27
G07	25.79	27.02	27.67	26.4	28.53	28.32
G08	30.31	33.34	34.12	31.3	35.15	34.08
G09	28.12	30.31	31.18	28.41	31.57	31.55
G10	35.61	37.54	37.7	N/A	N/A	N/A
G11	27.36	28.53	29.16	27.69	29.37	29.26
G12	28.34	31.23	32.2	28.85	32.27	32.12
H01	18.56	21.16	21.74	19.36	22.56	22.27
H02	21.61	22.81	23.22	21.8	23.4	23.26
H03	20.41	22.62	23.57	20.6	24.11	23.73
H04	27.65	29.33	29.96	28.08	30.34	30.07
H05	19.53	20.51	20.74	19.54	21.06	21.04
H06	36.15	35.85	35.61	35.86	35.97	36.36
H07	22.04	22.5	22.43	21.74	22.49	22.47
H08	22.15	22.5	22.5	21.81	22.6	22.6
H09	22.17	22.57	22.57	21.79	22.53	22.55
H10	20.53	20.47	20.55	20.42	20.56	20.55
H11	20.46	20.43	20.44	20.33	20.44	20.47
H12	20.74	20.68	20.61	20.67	20.52	20.75

## Sheet: PI3K-Akt pathway components
	DMSO 24h	DMSO 24h	DMSO 24h	CPD22 24h	CPD22 24h	CPD22 24h
Position	Control Group	Control Group	Control Group	Test Group 1	Test Group 1	Test Group 1
A01	26.28	27.68	29.24	27.27	28.85	28.21
A02	25.72	27.79	29.29	26.32	28.89	28.32
A03	26.32	28.05	29.12	27.06	28.83	28.44
A04	26.47	27.62	28.95	27.08	28.62	28.13
A05	30.24	32.01	33.91	30.96	33.45	33.32
A06	27.24	29.29	30.65	27.35	30.21	29.78
A07	31.92	31.82	32.12	32.18	32.13	31.57
A08	28.46	29.91	30.41	28.8	30.09	30.28
A09	23.31	26.39	27.46	23.3	27.96	26.48
A10	30.96	30.54	32.12	31.73	31.77	31.27
A11	23.9	25.72	26.83	24.42	26.85	26.23
A12	26.29	27.55	29.18	27.15	28.99	28.48
B01	27.77	28.97	30.4	28.76	30.02	29.35
B02	25.39	26.83	27.73	25.99	27.62	27.14
B03	25.59	27.3	28.68	26.09	28.23	27.63
B04	26.25	27.67	29.02	26.98	28.62	28.26
B05	24.31	25.87	27.38	25.05	26.66	26.29
B06	29.17	29.6	29.91	29.85	29.59	29.57
B07	25.5	26.52	27.22	25.57	27.18	26.95
B08	26.08	27.74	29.28	26.81	28.87	28.52
B09	31.16	32.2	34.79	31.28	34.27	33.2
B10	33.38	33.56	34.13	34.18	33.17	33.24
B11	25	27.02	28.15	25.58	27.94	27.3
B12	28.78	28.83	30.53	29.31	29.42	29.01
C01	29.38	31.08	32.25	29.99	31.79	31.34
C02	27.08	28.33	30.07	27.45	29.43	28.8
C03	21.4	23.38	24.32	21.9	24.32	23.87
C04	26.67	28.54	29.55	26.92	29.47	28.84
C05	28.24	30.23	31.94	28.93	31.42	30.71
C06	25.46	27.42	28.52	25.65	27.88	27.52
C07	25.86	27.95	28.6	26.06	28.7	28.35
C08	26.56	27.58	29.18	27.24	29.28	28.49
C09	33.01	34.19	35.37	33.82	33.87	35.25
C10	25.8	27.87	29.58	27.05	29.15	29
C11	24.61	26.28	27.49	25.27	27.32	26.84
C12	28.04	29.68	31.23	28.22	31.1	30.33
D01	30.09	32.4	34	30.9	32.82	33.2
D02	20.92	22.78	23.98	21.14	23.63	23.06
D03	26.73	28.61	30.06	27.21	29.69	28.9
D04	26.03	27.68	29.06	26.8	29.04	28.36
D05	24.64	26.35	27.76	25.29	27.48	26.88
D06	26.79	28.33	29.38	27.14	29.18	28.67
D07	27.17	29.04	30.11	27.6	29.54	28.91
D08	27.4	28.91	29.99	28.05	29.64	29.44
D09	31.13	31.69	33.16	31.76	32.18	32.16
D10	27.18	28.52	29.27	27.97	29.37	29.07
D11	26.97	28.51	29.08	27.24	29.1	28.59
D12	28.26	29.43	30.53	28.59	30.19	29.72
E01	27.21	28.19	29.42	27.69	29.16	28.5
E02	21.79	23.41	24.59	22.48	24.41	23.85
E03	27.96	29.35	30.68	28.37	30.2	29.82
E04	26.44	27.5	29.14	27.13	28.43	27.98
E05	28.4	30.7	31.45	29.11	31.83	31.2
E06	29.18	31.06	32.5	29.66	32.4	31.56
E07	26.5	28.5	29.47	27.18	29.42	28.8
E08	26.14	27.76	28.6	26.4	28.36	27.85
E09	39.6	37.88	38.97	39.41	38.63	38.2
E10	28.44	30.19	31.65	28.89	31.07	30.64
E11	27.45	29.18	30.25	27.87	29.87	29.34
E12	25.29	26.84	28	26.28	27.74	27.21
F01	31.47	31.16	31.43	32.38	31.44	31.16
F02	31.75	33.15	33.72	32.04	33.89	32.64
F03	25.6	26.89	27.77	26.18	27.45	27.15
F04	25.49	27.69	28.99	26.74	29.36	28.65
F05	25.09	26.81	28.25	25.52	28.01	27.39
F06	23.38	25.09	26.02	23.8	25.9	25.33
F07	26.24	27.41	28.58	26.9	28.27	27.76
F08	25.89	27.76	29.05	26.45	28.64	28.15
F09	26.87	28.12	29.53	27.27	29.11	28.66
F10	28.58	30.08	30.79	28.41	30.33	30.27
F11	22.16	24.03	24.41	22.53	24.64	24.4
F12	32.57	32.2	33.2	32.23	32.78	32.49
G01	26.42	28.15	29.37	27.23	29.17	28.52
G02	24.27	26.14	27.3	24.77	27.06	26.52
G03	26.37	27.89	28.82	26.95	28.62	28.27
G04	27.96	29.23	30.47	28.79	30.59	29.91
G05	32.13	30.86	33.74	31.68	30.59	30.51
G06	29.76	31.5	33.04	30.11	33.01	31.95
G07	24.53	27.18	28.28	24.96	28.3	27.5
G08	27.61	29.45	30.87	27.6	30.19	29.7
G09	27.24	28.06	29.02	27.25	28.49	28.14
G10	29.27	29.71	30.48	29.97	30.01	29.77
G11	28.24	30.23	31.98	28.43	31.25	30.68
G12	24.49	25.83	27.08	25.25	27.1	26.56
H01	18.48	20.29	21.33	19.33	21.76	21.02
H02	21.65	22.61	23.53	21.94	23.41	22.86
H03	20.22	21.69	22.99	20.45	23.02	22.27
H04	27.64	29.01	29.92	28.15	29.83	29.24
H05	19.45	20.69	21.08	19.7	21.12	21
H06	37.44	36.09	36.82	38.29	35.42	35.51
H07	22.01	22.41	22.53	21.88	22.46	22.41
H08	21.95	22.35	22.48	21.95	22.37	22.46
H09	22.06	22.43	22.49	21.82	22.42	22.5
H10	20.24	20.4	20.59	20.18	20.53	20.39
H11	20.12	20.54	20.5	20.17	20.51	20.38
H12	20.33	20.72	20.66	20.57	20.79	20.6
