# Supplementary material for: Comprehending Meningioma Signaling Cascades Using Multipronged Proteomics Approaches & Targeted Validation of Potential Markers
Source: Front Oncol. 2020 Aug 26;10:1600. doi: 10.3389/fonc.2020.01600 (PMC7482667; doi:10.3389/fonc.2020.01600)
Supplement: Supplementary file 9 [file Table_9.xlsx]

## Sheet: PATHWAY SPECIFIC
Replicate	Sample Type	Analyte Concentration	BioReplicate
01042019_Altis_Shuvo_List3_Sample30_ARA1	Unknown		ARA
01042019_Altis_Shuvo_List3_Sample31_ARA2	Unknown		ARA
01042019_Altis_Shuvo_List3_Sample32_ARA3	Unknown		ARA
04042019_Altis_Shuvo_List3_ARA4	Unknown		ARA
04042019_Altis_Shuvo_List3_Sample35	Unknown		MGI
04042019_Altis_Shuvo_List3_Sample36	Unknown		MGI
04042019_Altis_Shuvo_List3_Sample37	Unknown		MGI
04042019_Altis_Shuvo_List3_Sample38	Unknown		MGI
04042019_Altis_Shuvo_List3_Sample39	Unknown		MGI
11042019_Altis_Shuvo_List3_45	Unknown		MGI
11042019_Altis_Shuvo_List3_48	Unknown		MGI
11042019_Altis_Shuvo_List3_49	Unknown		MGI
13042019_Altis_Shuvo_List3_50	Unknown		MGI
13042019_Altis_Shuvo_List3_51	Unknown		MGI
15032019_Altis_Shuvo_List3_sample15	Unknown		MGI
15032019_Altis_Shuvo_List3_sample17	Unknown		MGI
15032019_Altis_Shuvo_List3_sample19	Unknown		MGI
15032019_Altis_Shuvo_List3_sample2	Unknown		MGI
15032019_Altis_Shuvo_List3_sample4	Unknown		MGI
15032019_Altis_Shuvo_List3_sample5	Unknown		MGI
15032019_Altis_Shuvo_List3_sample6	Unknown		MGI
15032019_Altis_Shuvo_List3_sample7	Unknown		MGI
15032019_Altis_Shuvo_List3_sample8	Unknown		MGI
16042019_Altis_Shuvo_List3_54	Unknown		MGI
16042019_Altis_Shuvo_List3_57	Unknown		MGI
16042019_Altis_Shuvo_List3_60	Unknown		MGI
19032019_Altis_Shuvo_List3_sample21	Unknown		MGI
19032019_Altis_Shuvo_List3_sample22	Unknown		MGI
19032019_Altis_Shuvo_List3_sample24	Unknown		MGI
22042019_Altis_Shuvo_List3_62	Unknown		MGI
22042019_Altis_Shuvo_List3_63	Unknown		MGI
22042019_Altis_Shuvo_List3_64	Unknown		MGI
22042019_Altis_Shuvo_List3_65	Unknown		MGI
22042019_Altis_Shuvo_List3_66	Unknown		MGI
22042019_Altis_Shuvo_List3_68	Unknown		MGI
22042019_Altis_Shuvo_List3_70	Unknown		MGI
01042019_Altis_Shuvo_List3_Sample33	Unknown		MGII
04042019_Altis_Shuvo_List3_Sample34	Unknown		MGII
04042019_Altis_Shuvo_List3_Sample40	Unknown		MGII
11042019_Altis_Shuvo_List3_44	Unknown		MGII
11042019_Altis_Shuvo_List3_47_20190412132027	Unknown		MGII
13042019_Altis_Shuvo_List3_52	Unknown		MGII
15032019_Altis_Shuvo_List3_sample1	Unknown		MGII
15032019_Altis_Shuvo_List3_sample12	Unknown		MGII
15032019_Altis_Shuvo_List3_sample13	Unknown		MGII
15032019_Altis_Shuvo_List3_sample14	Unknown		MGII
15032019_Altis_Shuvo_List3_sample16	Unknown		MGII
15032019_Altis_Shuvo_List3_sample18	Unknown		MGII
15032019_Altis_Shuvo_List3_sample3	Unknown		MGII
16042019_Altis_Shuvo_List3_55	Unknown		MGII
16042019_Altis_Shuvo_List3_56	Unknown		MGII
19032019_Altis_Shuvo_List3_sample20	Unknown		MGII
22042019_Altis_Shuvo_List3_61	Unknown		MGII
28032019_Altis_Shuvo_List3_sample27	Unknown		MGII
28032019_Altis_Shuvo_List3_sample28	Unknown		MGII
28032019_Altis_Shuvo_List3_sample29	Unknown		MGII

## Sheet: EIF4G1
K.QVTQLAIDTEER.L [781, 792] (rank 2)								K.GVIDLIFEK.A [795, 803] (rank 3)					K.VEYTLGEESEAPGQR.A [1421, 1435] (rank 1)
		y7 - 833.3999+	y6 - 762.3628+	y4 - 534.2518+				y6 - 764.4189+	y3 - 423.2238+	y7 - 439.2551++				y10 - 1059.4701+	y5 - 528.2889+	y4 - 457.2518+
Replicate		Peak Area Normalized	Peak Area Normalized	Peak Area Normalized	Cumulative Peak Area		Replicate	Peak Area Normalized	Peak Area Normalized	Peak Area Normalized			Replicate	Peak Area Normalized	Peak Area Normalized	Peak Area Normalized
Library		0.523085	0.208913	0.268003			Library	0.489698	0.510302	0			Library	0.504534	0.1979	0.297566
01042019...Sample30_ARA1	ARA	0.0420476	0.0163039	0.0156525	0.074004		01042019...Sample30_ARA1	0.362709	0.00741603	0.107549			01042019...Sample30_ARA1	0.0115973	0.0903628	0.0486589
01042019...Sample31_ARA2	ARA	0.042389	0.0221094	0.024774	0.0892724		01042019...Sample31_ARA2	0.219495	0.00404512	0.0366321			01042019...Sample31_ARA2	0.134638	0.124156	0.358697
01042019...Sample32_ARA3	ARA	0.0139503	0.00692836	0.0107022	0.0315808		01042019...Sample32_ARA3	0.246619	0.00568564	0.0896611			01042019...Sample32_ARA3	0	0.067738	0.0344752
04042019...ARA4	ARA	0.0189371	0.00681511	0.00902989	0.0347821		04042019...ARA4	0	0	0			04042019...ARA4	0.00756316	0.098147	0.0315589
04042019...Sample35	MGI	0.0359789	0.0192802	0.0142218	0.069481		04042019...Sample35	0.0389614	0.0104761	0.00402212			04042019...Sample35	0.193522	0.0817046	0.337062
04042019...Sample36	MGI	0.010087	0.000747463	0.00282473	0.0136592		04042019...Sample36	0.0107741	0.00833638	0.0104132			04042019...Sample36	0.031276	0.0379554	0.098441
04042019...Sample37	MGI	0.0218541	0.0174559	0.0210506	0.0603606		04042019...Sample37	0.0395074	0.0249187	0.0192594			04042019...Sample37	0	0.0756668	0.240722
04042019...Sample38	MGI	0.0251525	0.0119798	0.0114959	0.0486281		04042019...Sample38	0.127997	0.0157872	0.0242986			04042019...Sample38	0.195589	0.0139917	0.110093
04042019...Sample39	MGI	0.0229891	0.00661386	0.00591685	0.0355198		04042019...Sample39	0.0966271	0.00795745	0.0249936			04042019...Sample39	0.0679163	0.0243719	0.0789773
11042019...45	MGI	0	0	0	0		11042019...45	0	0	0			11042019...45	0	0	0
11042019...48	MGI	0	0	0	0		11042019...48	0	0	0			11042019...48	0	0	0
11042019...49	MGI	0	0	0	0		11042019...49	0.00150948	0	0			11042019...49	0	0	0
13042019...50	MGI	0.0282928	0.00392865	0.00870129	0.0409227		13042019...50	0.0495317	0.0154409	0.0200466			13042019...50	0.0631671	0.113993	0.0766421
13042019...51	MGI	0	0	0	0		13042019...51	0	0	0			13042019...51	0	0	0
15032019...sample15	MGI	0.0986829	0.0110516	0.0212562	0.130991		15032019...sample15	0.131096	0.0113772	0.0106833			15032019...sample15	0.0930435	0	0.0446901
15032019...sample17	MGI	0.264791	0.085187	0.0299485	0.379927		15032019...sample17	0.554502	0.0219324	0.129971			15032019...sample17	0.041858	0.015314	0.0399316
15032019...sample19	MGI	0.612327	0.216522	0.171151	1		15032019...sample19	0.211582	0.0354305	0.057135			15032019...sample19	0.316995	0.146686	0.352042
15032019...sample2	MGI	0.0219464	0.013808	0.01542	0.0511744		15032019...sample2	0.0633178	0.00827568	0.0239842			15032019...sample2	0.331381	0.219156	0.449463
15032019...sample4	MGI	0.0249207	0.000391411	0.00227438	0.0275865		15032019...sample4	0.124705	0.0236351	0.0512812			15032019...sample4	0.258008	0.0507151	0.353232
15032019...sample5	MGI	0	0	0	0		15032019...sample5	0	0	0			15032019...sample5	0	0	0
15032019...sample6	MGI	0.211635	0.0691155	0.0896618	0.370412		15032019...sample6	0.464288	0.0260589	0.111159			15032019...sample6	0	0	0.00486423
15032019...sample7	MGI	0.0471216	0.0984673	0.0453935	0.190982		15032019...sample7	0.134404	0.0175353	0.130398			15032019...sample7	0.326727	0.335884	0.108821
15032019...sample8	MGI	0.166573	0.0506235	0.0577233	0.27492		15032019...sample8	0.108933	0.0344123	0.0231584			15032019...sample8	0	0	1.39676e-07
16042019...54	MGI	0	0	0	0		16042019...54	0	0	0.000935861			16042019...54	0	0	0
16042019...57	MGI	0.023866	0.00443057	0.0034363	0.0317328		16042019...57	0.0198974	0.00640065	0.0141131			16042019...57	0	0	0
16042019...60	MGI	0.023115	0.0055138	0.00634735	0.0349762		16042019...60	0.0327898	0.00558204	0.0104056			16042019...60	0	0	0.00330875
19032019...sample21	MGI	0	0	0	0		19032019...sample21	0	0	0			19032019...sample21	0	0	0
19032019...sample22	MGI	0.0118501	0.00964825	0.0144966	0.0359949		19032019...sample22	0.18317	0.00799672	0.0471534			19032019...sample22	0	0	0
19032019...sample24	MGI	0.0648067	0.0358161	0.011467	0.11209		19032019...sample24	0.240101	0.00966584	0.045267			19032019...sample24	0	0.0112656	0.0673004
22042019...62	MGI	0.00718734	0.00571578	0.0101654	0.0230685		22042019...62	0.00933983	0.0747972	0.0276377			22042019...62	0	0	0.00601761
22042019...63	MGI	0.00459157	0.0328529	0.00754242	0.0449869		22042019...63	0.0566873	0.00453858	0.0326927			22042019...63	0.0566466	0	0.024344
22042019...64	MGI	0.0090481	0.0224849	0.0205202	0.0520533		22042019...64	0.146254	0.00222304	0.0646392			22042019...64	0.0900748	0.022805	0.115706
22042019...65	MGI	0.0219601	0.00213217	0.00999555	0.0340878		22042019...65	0.0382007	0.00328202	0.00852465			22042019...65	0.0568094	0.0169474	0.0568894
22042019...66	MGI	0.0169068	0.0127012	0.0279846	0.0575926		22042019...66	0.0695157	0.00917723	0.0217014			22042019...66	3.07368e-07	0	0
22042019...68	MGI	0.0729958	0.018334	0.0371511	0.128481		22042019...68	0.130378	0.0271945	0.0887512			22042019...68	0.228827	0.254754	0.362141
22042019...70	MGI	0.0622964	0.0268658	0.049874	0.139036		22042019...70	0.0822709	0.00957909	0.0205123			22042019...70	0.0727971	0.102608	0.212706
01042019...Sample33	MGI	0.00196784	0	0.00382598	0.00579382		01042019...Sample33	0.00276825	0.000665059	0.00267124			01042019...Sample33	0	0	0
04042019...Sample34	MGII	0.00696968	0.0053112	0.00654064	0.0188215		04042019...Sample34	0.0456971	0.000237938	0.015212			04042019...Sample34	0.0727052	0.0457672	0.0802169
04042019...Sample40	MGII	0.0437864	0.0175275	0.0126232	0.073937		04042019...Sample40	0.0805419	0.0116747	0.0197156			04042019...Sample40	0.135688	0.0322522	0.191505
11042019...44	MGII	0	0	0	0		11042019...44	0	0	0			11042019...44	0	0	0
11042019...47_20190412132027	MGII	0	0	0	0		11042019...47_20190412132027	0	0	0			11042019...47_20190412132027	0	0	0
13042019...52	MGII	0.012951	0.00221366	0.00270513	0.0178698		13042019...52	0	0.00466189	0.00836518			13042019...52	0	0	0
15032019...sample1	MGII	0.0244631	0.00258955	0.00391044	0.030963		15032019...sample1	0.00125121	0.0129957	0			15032019...sample1	0	0	0
15032019...sample12	MGII	0.111681	0.0352229	0.0330741	0.179978		15032019...sample12	0.441846	0.0042023	0.0713404			15032019...sample12	0.190719	0.0599967	0.274453
15032019...sample13	MGII	0.0522558	0.029816	0.0209835	0.103055		15032019...sample13	0.30988	0.0206779	0.0724562			15032019...sample13	0.0218221	0	0.0271904
15032019...sample14	MGII	0.32631	0.122069	0.093439	0.541818		15032019...sample14	0.200293	0.0176794	0.052315			15032019...sample14	0.0626199	0.141971	0.242646
15032019...sample16	MGII	0.302402	0.111706	0.0832775	0.497385		15032019...sample16	0.835571	0.00333511	0.161094			15032019...sample16	0.350228	0.200273	0.142264
15032019...sample18	MGII	0.157938	0.0775242	0.0496302	0.285092		15032019...sample18	0.0615508	0.0257737	0.155274			15032019...sample18	0.209924	0.244749	0.215957
15032019...sample3	MGII	0.0514748	0.015165	0.00940217	0.076042		15032019...sample3	0.0950938	0.0345612	0.035231			15032019...sample3	0.390363	0.198309	0.35749
16042019...55	MGII	0.00616499	0.000597904	0.00389035	0.0106532		16042019...55	0.0519562	0	0.0205479			16042019...55	0.017781	0.0142494	0
16042019...56	MGII	0.0464808	0.0106557	0.0154198	0.0725564		16042019...56	0.00560906	0.0213842	0.0211989			16042019...56	0	0	0
19032019...sample20	MGII	0.0487134	0.00544141	0.0038313	0.0579861		19032019...sample20	0.166911	0.00130544	0.0704561			19032019...sample20	0	0	0
22042019...61	MGII	0.00955928	0.0030428	0.00675374	0.0193558		22042019...61	0.04317	0.00364214	0.013169			22042019...61	0.091655	0.0228416	0.0558101
28032019...sample27	MGII	0	0	0	0		28032019...sample27	0.000591211	0	0			28032019...sample27	0	0	0
28032019...sample28	MGII	0	0	0.00113034	0.00113034		28032019...sample28	0.0230066	0.00673185	0.00572081			28032019...sample28	0	0	0
28032019...sample29	MGII	0	0	0.00269962	0.00269962		28032019...sample29	0.00434905	0	0			28032019...sample29	2.19581e-07	0	0

## Sheet: CSNK2A1
R.GGPNIITLADIVK.D [89, 101] (rank 3)						K.VLGTEDLYDYIDK.Y [247, 259] (rank 1)					R.FNDILGR.H [268, 274] (rank 2)
	y9 - 985.6292+	y7 - 759.4611+	y6 - 658.4134+				y8 - 1044.4884+	y5 - 653.3141+	y3 - 375.2238+				y5 - 573.3355+	y4 - 458.3085+	y3 - 345.2245+
Replicate	Peak Area Normalized	Peak Area Normalized	Peak Area Normalized			Replicate	Peak Area Normalized	Peak Area Normalized	Peak Area Normalized			Replicate	Peak Area Normalized	Peak Area Normalized	Peak Area Normalized
Library	0.165764	0.555405	0.278831			Library	0.352019	0.390418	0.257563			Library	0	0.434718	0.565282
01042019...Sample30_ARA1	0	0.043027	0.047558			01042019...Sample30_ARA1	2.3422e-05	4.69533e-05	3.95926e-05			01042019...Sample30_ARA1	0.0537712	0.0283876	0.0439631
01042019...Sample31_ARA2	0.00580256	0.0135878	0.0100956			01042019...Sample31_ARA2	0.00165383	0.000249239	0.000483938			01042019...Sample31_ARA2	0.0693919	0.0409716	0.0780752
01042019...Sample32_ARA3	0	0.0347995	0.0444364			01042019...Sample32_ARA3	2.3633e-05	4.78663e-05	2.96498e-05			01042019...Sample32_ARA3	0.0469588	0.0295715	0.0362749
04042019...ARA4	0.00198224	0.0483483	0.0670916			04042019...ARA4	2.61879e-05	2.50691e-05	4.29144e-05			04042019...ARA4	0.0624935	0.0199437	0.0592263
04042019...Sample35	0.184897	0.0103047	0.0284251			04042019...Sample35	1.71549e-05	0.000357433	1.7147e-05			04042019...Sample35	0.0491371	0.0184842	0.0377164
04042019...Sample36	0.077575	0.00196448	0.00448967			04042019...Sample36	0	7.54018e-05	2.61128e-05			04042019...Sample36	0.011825	0.00548564	0.0277849
04042019...Sample37	0.0020292	0.0996355	0.134716			04042019...Sample37	8.67406e-06	7.84074e-05	3.28241e-05			04042019...Sample37	0.0646241	0.0261609	0.0741997
04042019...Sample38	0.00215318	0.0139338	0.00452139			04042019...Sample38	0.0181172	0.000169191	9.10615e-05			04042019...Sample38	0.0770898	0.0294152	0.0624995
04042019...Sample39	0.00226481	0.0241124	0.00407359			04042019...Sample39	7.02425e-06	0.000375009	6.97358e-05			04042019...Sample39	0.0979514	0.0472059	0.0710133
11042019...45	0	0	0			11042019...45	0	0	0			11042019...45	0	0	0
11042019...48	0	0	0			11042019...48	0	0	0			11042019...48	0	0	0
11042019...49	0	0.00191596	0.00121859			11042019...49	0	3.9773e-05	0			11042019...49	0.0300925	0.0133964	0.0220674
13042019...50	0.0081689	0.040108	0.0131864			13042019...50	0.0336685	0.000224556	0.000113679			13042019...50	0.0990174	0.0405386	0.101508
13042019...51	0	0	0.000977515			13042019...51	0.000156392	0	0			13042019...51	0.000953667	1.16334e-05	0.000839889
15032019...sample15	0.0162527	0.0812486	0.00983889			15032019...sample15	5.95338e-05	0.000106642	0.000268829			15032019...sample15	0.0107249	0.00381383	0.0334029
15032019...sample17	0.0405605	0.351479	0.0604355			15032019...sample17	0.362111	0.00164913	0.000271172			15032019...sample17	0.0758567	0.0242262	0.102834
15032019...sample19	0.142245	0.686411	0.171344			15032019...sample19	0.387931	0.00114229	0.0004543			15032019...sample19	0.168915	0.0225501	0.0879697
15032019...sample2	0.0116098	0.283931	0.01926			15032019...sample2	9.26454e-05	0.000243865	7.14435e-05			15032019...sample2	0.143604	0.0635602	0.127449
15032019...sample4	0.0048054	0.0416983	0.00381773			15032019...sample4	1.52014e-05	6.17131e-05	9.54856e-05			15032019...sample4	0.0883348	0.031173	0.080095
15032019...sample5	0	0	0.000931672			15032019...sample5	0	0	7.91058e-05			15032019...sample5	0.00908819	0.0254879	0.0238382
15032019...sample6	0.032909	0.161689	0.0348135			15032019...sample6	0.251063	0.000898972	0.000137369			15032019...sample6	0.0301068	0.0128932	0.0341354
15032019...sample7	0.644943	0.0258158	0.115216			15032019...sample7	6.19145e-05	0.00186783	0.000483059			15032019...sample7	0.0998922	0.145869	0.124933
15032019...sample8	0.0199744	0.132814	0.0467676			15032019...sample8	0.000380922	0.000827827	0.000741438			15032019...sample8	0.00858692	0.0129372	0.0173751
16042019...54	0	0.00710872	0.00309932			16042019...54	0.000871209	0	0			16042019...54	0.0188422	0.00631961	0.0182269
16042019...57	0.00202787	0.00627797	0.00247698			16042019...57	1.97772e-05	9.78096e-06	0			16042019...57	0.0320964	0.0169178	0.0279036
16042019...60	0.00134342	0.0220519	0.0108207			16042019...60	5.65685e-05	7.50063e-05	1.82938e-05			16042019...60	0.042594	0.0182955	0.045509
19032019...sample21	0	0	0			19032019...sample21	0	0	0			19032019...sample21	0	0	0.000223767
19032019...sample22	0.00154354	0.0640993	0.0933455			19032019...sample22	1.07337e-05	0.000252229	0.000423121			19032019...sample22	0.000768575	0.00909372	0.0223899
19032019...sample24	0.0143218	0.00932495	0.0147817			19032019...sample24	2.19592e-06	0.000266388	0.000164321			19032019...sample24	0.0930032	0.0535266	0.105691
22042019...62	0.0172217	0.0600984	0.0117695			22042019...62	3.22493e-05	3.12843e-05	6.1693e-05			22042019...62	0.0858146	0.0408791	0.0806806
22042019...63	0.00268528	0.0254826	0.00942918			22042019...63	2.02847e-11	0.000372347	3.2065e-05			22042019...63	0.130654	0.0569226	0.111989
22042019...64	0.00429919	0.0282114	0.011336			22042019...64	7.05653e-05	7.41679e-05	0.00014602			22042019...64	0.0769677	0.0441173	0.0759261
22042019...65	0.0154351	0.0752306	0.0228934			22042019...65	0.112089	0.000607783	0.000253677			22042019...65	0.0998761	0.0589445	0.115923
22042019...66	0.00578304	0.0302186	0.0107892			22042019...66	1.83055e-05	0.000425981	7.73524e-05			22042019...66	0.049011	0.026606	0.0478011
22042019...68	0.0180653	0.269761	0.412146			22042019...68	0.000147196	0.00136942	0.0020018			22042019...68	0.134098	0.0740718	0.135689
22042019...70	0.0156606	0.231289	0.346354			22042019...70	0.000103668	0.000254381	0.000297858			22042019...70	0.11801	0.0589427	0.119154
01042019...Sample33	0	0.00376457	0.00131364			01042019...Sample33	0.00118477	4.81309e-05	1.30241e-05			01042019...Sample33	0.0248268	0.0061647	0.0186542
04042019...Sample34	0.00167923	0.0178172	0.00300678			04042019...Sample34	3.71597e-05	5.37161e-05	1.48485e-05			04042019...Sample34	0.045178	0.021369	0.0419082
04042019...Sample40	0.00601287	0.0307901	0.0107117			04042019...Sample40	0.0368843	0.000197391	9.98604e-05			04042019...Sample40	0.0829272	0.0458869	0.0776946
11042019...44	0	0	0			11042019...44	0	0	0			11042019...44	0	0	0
11042019...47_20190412132027	0	0	0			11042019...47_20190412132027	0	0	0			11042019...47_20190412132027	0	0	0
13042019...52	0.0594863	0	0.00760301			13042019...52	0.00233611	1.50799e-05	8.09665e-05			13042019...52	0.012635	0.00423387	0.00503018
15032019...sample1	0.0211075	0.0323596	0.00129024			15032019...sample1	0.000411012	0.000198817	8.92321e-05			15032019...sample1	0.00104317	0.00111632	0.00420433
15032019...sample12	0.0496816	0.217236	0.111252			15032019...sample12	0.995597	0.00345062	0.000952872			15032019...sample12	0.124415	0.0485208	0.10678
15032019...sample13	0.0153358	0.0808744	0.0197837			15032019...sample13	0.000952841	0.000482403	0.000201458			15032019...sample13	0.0596045	0.0246534	0.0679274
15032019...sample14	0.00575696	0.0880304	0.138562			15032019...sample14	0.000402708	0.00117985	0.00198428			15032019...sample14	0.0103497	0.0270861	0.0410764
15032019...sample16	0.0311887	0.170239	0.059919			15032019...sample16	0.000918952	0.000823743	0.000957278			15032019...sample16	0.129134	0.0472747	0.0712915
15032019...sample18	0.0197644	0.125333	0.140359			15032019...sample18	0.000260057	2.62173e-06	8.90935e-05			15032019...sample18	0.000658904	0.870193	0.129148
15032019...sample3	0.0104083	0.0333127	0.0127607			15032019...sample3	0.199739	0.000808516	7.04904e-05			15032019...sample3	0.0589105	0.0501141	0.0637871
16042019...55	0.00177312	0.0094038	0.00743087			16042019...55	2.96099e-06	1.14524e-05	1.43502e-05			16042019...55	0.0537496	0.0251389	0.0487013
16042019...56	0.00585725	0.0115731	0.0196063			16042019...56	0.000791025	0.000520801	0.000666479			16042019...56	0.0114352	0.00592657	0.00712725
19032019...sample20	0.00369631	0.0129954	0.0321191			19032019...sample20	4.90043e-05	7.29342e-05	7.12043e-05			19032019...sample20	0.0654074	0.0369528	0.0828654
22042019...61	0.00622468	0.0311193	0.0123889			22042019...61	0.000212934	0.000166288	5.6839e-05			22042019...61	0.152432	0.0703034	0.124113
28032019...sample27	0	0	0.00345635			28032019...sample27	0.000344964	0	0			28032019...sample27	0.0113945	0.00403498	0.0077598
28032019...sample28	0.00216105	0.00163111	0.0089675			28032019...sample28	0.00368618	0.000128142	6.77012e-05			28032019...sample28	0.0137182	0.00368797	0.0122731
28032019...sample29	0.000964433	0.000102237	0.00363281			28032019...sample29	0.000360877	2.13524e-05	2.20933e-06			28032019...sample29	0.00605786	0.00364862	0.00919736

## Sheet: NFKB
K.NIHLHAHSLVGK.H [104, 115]						K.EMDLSVVR.L [205, 212] (rank 3)						R.AGADLSLLDR.L [603, 612] (rank 1)
	y6 - 640.3777+	y9 - 481.2825++	y8 - 424.7405++				y5 - 573.3719+	y3 - 373.2558+	y3 - 187.1315++				y6 - 716.4301+	y4 - 516.3140+	y3 - 403.2300+
Replicate	Peak Area Normalized	Peak Area Normalized	Peak Area Normalized			Replicate	Peak Area Normalized	Peak Area Normalized	Peak Area Normalized			Replicate	Peak Area Normalized	Peak Area Normalized	Peak Area Normalized
01042019...Sample30_ARA1	0.0373841	0.00488488	0.0184766			Library	0.586386	0.317699	0.0959142			Library	0.448852	0.243454	0.307694
01042019...Sample31_ARA2	0.210851	0.0290862	0.0794779			01042019...Sample30_ARA1	0.00298108	0.00353817	0.00976923			01042019...Sample30_ARA1	0.112843	0.0497107	0.0178023
01042019...Sample32_ARA3	0.0213103	0.00721546	0.00667126			01042019...Sample31_ARA2	0.00773867	0.0170236	0.0218816			01042019...Sample31_ARA2	0.161865	0.092649	0.0288063
04042019...ARA4	0.162528	0.0249927	0.0605919			01042019...Sample32_ARA3	0.00290077	0.0026862	0.0590215			01042019...Sample32_ARA3	0.0424416	0.0978758	0.00918695
04042019...Sample35	0.0237636	0.00525813	0.0111991			04042019...ARA4	0.00280956	0.00140524	0.0646714			04042019...ARA4	0.119207	0.0835138	0.0176326
04042019...Sample36	0.105588	0.0247967	0.041836			04042019...Sample35	0.00608769	0.00101795	0.118214			04042019...Sample35	0.146266	0.0332525	0.016054
04042019...Sample37	0.085491	0.00861724	0.0362068			04042019...Sample36	0.00349367	0.00484293	0.104465			04042019...Sample36	0.409599	0.0225958	0.0253508
04042019...Sample38	0.13811	0.0219129	0.0591634			04042019...Sample37	0.00904476	0.00285517	0.158455			04042019...Sample37	0.905799	0.0455271	0.0486742
04042019...Sample39	0.0758218	0.00470413	0.0302048			04042019...Sample38	0.00550302	0.00360521	0.0427927			04042019...Sample38	0.0466377	0.0236045	0.0144542
11042019...45	0	0	0			04042019...Sample39	0.00171146	0.00531137	0.0134406			04042019...Sample39	0.0241734	0.0265615	0.0236737
11042019...48	0	0	0			11042019...45	0	6.84252e-11	0			11042019...45	0	0	0
11042019...49	0.0343234	0.00604912	0.00894803			11042019...48	0	0	0			11042019...48	0	0	0
13042019...50	0.119702	0.0214044	0.0535342			11042019...49	0.00053818	0.00373315	0.00858557			11042019...49	0.0247651	0.00200732	0.00801612
13042019...51	0.0182131	0.000986788	0.00469725			13042019...50	0.00731767	0.00203032	2.60884e-05			13042019...50	0.0198172	0.0487453	0.0146106
15032019...sample15	0.0426947	0.0253037	0.0322757			13042019...51	0	0.00137962	0.000434378			13042019...51	0	0.00312938	0
15032019...sample17	0.180823	0.0255331	0.0607542			15032019...sample15	0.00543076	0.00451581	0.0489092			15032019...sample15	0.00531677	0.178212	0.0120331
15032019...sample19	0.160963	0.0238996	0.063896			15032019...sample17	0.0784419	0.04538	0.0190542			15032019...sample17	0.183308	0.040275	0.0091799
15032019...sample2	0.266388	0.0206492	0.106152			15032019...sample19	0.0225538	0.0166242	0.0303048			15032019...sample19	0.0562693	0.100179	0.0364354
15032019...sample4	0.650382	0.0891595	0.260458			15032019...sample2	0.00928304	0.00959058	0.0196077			15032019...sample2	0.165868	0.041511	0.0142513
15032019...sample5	0	0.00123739	0			15032019...sample4	0.00327945	0.00351664	0.00138953			15032019...sample4	0.113485	0.119466	0.101563
15032019...sample6	0.0809556	0.0182542	0.0325027			15032019...sample5	0.000869354	0.00127086	0.0142636			15032019...sample5	0.013108	0.0025296	0
15032019...sample7	0.00453961	0.0617313	0.00305179			15032019...sample6	0.00185847	0.000687016	0.0038505			15032019...sample6	0.00892625	0.00730173	0.00165134
15032019...sample8	0.0337676	0.00573595	0.0190341			15032019...sample7	0.0172109	0.00383609	0.00375219			15032019...sample7	0.237207	0.0617845	0.141391
16042019...54	0.0411042	0.00670858	0.0231378			15032019...sample8	0.00784602	0.0164203	0.0324643			15032019...sample8	0.028992	0.0214071	0.00541325
16042019...57	0.0852359	0.011845	0.0257677			16042019...54	0.000393914	0.00128895	0.0268443			16042019...54	0.0153794	0.00180013	0.00451851
16042019...60	0.0494521	0.0122934	0.0223158			16042019...57	0.000177734	0.00062978	0.00340474			16042019...57	0.0142105	0.0276731	0.00563662
19032019...sample21	0	0	0			16042019...60	0.00544412	0.00184823	0.0104159			16042019...60	0.0284307	0.00990717	0.016329
19032019...sample22	0.016599	0.00320829	0.00973397			19032019...sample21	0	0.000162432	0.000539698			19032019...sample21	0.00722422	0.000820821	0
19032019...sample24	0.0376921	0.00356717	0.00382714			19032019...sample22	0.000809658	0.00234846	0.00464766			19032019...sample22	0.00619133	0.00219583	0.00150568
22042019...62	0.316515	0.0465767	0.163291			19032019...sample24	0.00171129	0.00158975	0.00370242			19032019...sample24	0.425217	0.0517669	0.0170935
22042019...63	0.093485	0.0163021	0.0364238			22042019...62	0.00274915	0.0113509	0.0295904			22042019...62	0.00465363	0.0340993	0.00795362
22042019...64	0.298033	0.0428785	0.128907			22042019...63	0.00980601	0.0131406	0.0199367			22042019...63	0.0146898	0.025356	0.0125682
22042019...65	0.0834432	0.0118432	0.0419076			22042019...64	0.0170061	0.00143185	0.00546932			22042019...64	0.0143613	0.029215	0.00827674
22042019...66	0.360808	0.0492177	0.167102			22042019...65	0.00303386	0.00213516	0.00159296			22042019...65	0.0151931	0.00591508	0.00815774
22042019...68	0.389438	0.0507016	0.172048			22042019...66	0.00201625	0.00660226	0.0161197			22042019...66	0.0558698	0.0165947	0.00741267
22042019...70	0.212972	0.0417477	0.109128			22042019...68	0.00701796	0.00974871	0.0349435			22042019...68	0.0252633	0.130464	0.0188858
01042019...Sample33	0.0660392	0.0100252	0.0237542			22042019...70	0.0097439	0.00925732	0.0354152			22042019...70	0.0262595	0.0535153	0.0224266
04042019...Sample34	0.0843012	0.0197631	0.0348348			01042019...Sample33	0.000453917	0.00137101	0.00217711			01042019...Sample33	0.108341	0.0126061	0.00354563
04042019...Sample40	0.258698	0.042637	0.122937			04042019...Sample34	0.000848558	0.00494371	0.0798549			04042019...Sample34	0.0177225	0.0196386	4.70078e-05
11042019...44	0	0	0			04042019...Sample40	0.00458873	0.00389312	0.0234011			04042019...Sample40	0.136054	0.0374047	0.00735603
11042019...47_20190412132027	0	0	0			11042019...44	0	0	0			11042019...44	0	0	0
13042019...52	0.0022365	0.00070291	0.000679237			11042019...47_20190412132027	0	0	0			11042019...47_20190412132027	0	0	0
15032019...sample1	0.0300126	0.00354072	0.00557969			13042019...52	0.000807788	0.00120443	0.0111784			13042019...52	0.0585804	0.00390957	0.00271803
15032019...sample12	0.0782379	0.0110749	0.0293804			15032019...sample1	0.000242373	0.0011626	0.00120979			15032019...sample1	0.00251639	0.00737954	0.00026274
15032019...sample13	0.147819	0.0523232	0.146519			15032019...sample12	0.0019472	0.0057076	0.0243617			15032019...sample12	0.439598	0.017535	0.034311
15032019...sample14	0.0141708	0.0100028	0.00914476			15032019...sample13	0.0133688	0.00947664	0.0108727			15032019...sample13	0.0925033	0.0497396	0.0278137
15032019...sample16	0.11222	0.0218337	0.064402			15032019...sample14	0.00753462	0.00773234	0.0222324			15032019...sample14	0.220864	0.0401436	0.0268241
15032019...sample18	0.0572235	0.0149739	0.0183657			15032019...sample16	0.00786972	0.0021401	0.00827222			15032019...sample16	0.0268348	0.0146175	0.00751857
15032019...sample3	0.516149	0.0727708	0.229938			15032019...sample18	0.0141036	0.0131909	0.0261067			15032019...sample18	0.0546581	0.127181	0.0474084
16042019...55	0.0396146	0.00704818	0.0167557			15032019...sample3	0.00690695	0.0604076	0.932685			15032019...sample3	0.188634	0.0133221	0.0296409
16042019...56	0.00369335	0.00271059	0			16042019...55	0.00490065	0.00169387	0.0502103			16042019...55	0.00811121	0.0124992	0.00553356
19032019...sample20	0.0340128	0.00398836	0.0152436			16042019...56	0.000102682	0.00120978	0.00373852			16042019...56	0.0689557	0.0047497	0.00510378
22042019...61	0.0561455	0.00789858	0.0282059			19032019...sample20	0.0012045	0.000768704	0.00443704			19032019...sample20	0.0238942	0.017764	0.0033811
28032019...sample27	0.00611769	0.000679902	0.00631838			22042019...61	0.00218131	0.00200216	0.00467493			22042019...61	0.0140656	0.0845116	0.00870604
28032019...sample28	0.0503158	0.0139459	0.025145			28032019...sample27	0.000505035	0.000415304	0.00472724			28032019...sample27	0.00245714	0.00663214	0.0029255
28032019...sample29	0.00334556	0	0.00192701			28032019...sample28	0.000634376	0.00454954	0.0111082			28032019...sample28	0.212374	0.0218311	0.015227
						28032019...sample29	0.000169879	0.000256808	0.00139702			28032019...sample29	0.00345466	0.00771146	0.000278115

## Sheet: MAP4
K.NVVLPTETEVAPAK.D [332, 345] (rank 3)						K.DGVLTLANNVTPAK.D [560, 573] (rank 2)						K.TTTAAAVASTGPSSR.S [809, 823] (rank 1)
	y10 - 1042.5415+	y4 - 386.2398+	y10 - 521.7744++				y5 - 515.3188+	y4 - 416.2504+	y3 - 315.2027+				y6 - 604.3049+	y5 - 503.2572+	y3 - 175.0951++
Replicate	Peak Area Normalized	Peak Area Normalized	Peak Area Normalized			Replicate	Peak Area Normalized	Peak Area Normalized	Peak Area Normalized			Replicate	Peak Area Normalized	Peak Area Normalized	Peak Area Normalized
Library	0.618626	0.213431	0.167943			Library	0.0455299	0.281686	0.672784			Library	0.334082	0.494759	0.17116
01042019...Sample30_ARA1	0.0571562	0.0128699	0.0149166			01042019...Sample30_ARA1	0.00799606	0.106874	0.0105803			01042019...Sample30_ARA1	0.000378703	0.000828092	0.00632798
01042019...Sample31_ARA2	0.0739738	0.0833611	0.0353528			01042019...Sample31_ARA2	0.00498081	0.0808136	0.00841901			01042019...Sample31_ARA2	0.00172609	0.00345105	0.0823117
01042019...Sample32_ARA3	0.0350953	0.00268792	0.00728683			01042019...Sample32_ARA3	0.00412064	0.0899935	0.0103935			01042019...Sample32_ARA3	0.00418304	0.000563839	0.00559892
04042019...ARA4	0.119354	0.0368452	0.0728961			04042019...ARA4	0.0091328	0.144936	0.0199778			04042019...ARA4	0.0506758	0.00157701	0.0103275
04042019...Sample35	0.0620494	0.037409	0.0169457			04042019...Sample35	0.0150331	0.223481	0.0268176			04042019...Sample35	0.0333272	0.000667706	0.0103006
04042019...Sample36	0.0779349	0.0268044	0.0580341			04042019...Sample36	0.00414038	0.0619181	0.0121603			04042019...Sample36	0.15029	0.00415341	0.0432141
04042019...Sample37	0.0380858	0.0489491	0.0299918			04042019...Sample37	0.0169633	0.258513	0.0286191			04042019...Sample37	0.0516704	0.00319957	0.012549
04042019...Sample38	0.147756	0.0285127	0.0347017			04042019...Sample38	0.00164107	0.0211199	0.00527569			04042019...Sample38	0.102321	0.00154452	0.0222757
04042019...Sample39	0.137066	0.0338474	0.03326			04042019...Sample39	0.00643603	0.0698138	0.0128174			04042019...Sample39	0.0928921	0.00109296	0.0218433
11042019...45	0	0	0			11042019...45	0	0	0			11042019...45	0	0	0
11042019...48	0	0	0			11042019...48	0	0	0			11042019...48	0	0	0
11042019...49	0.0324222	0.0032052	0.00079432			11042019...49	0.000314768	0.00425042	0.0018953			11042019...49	0.0117177	4.01101e-05	0.0029542
13042019...50	0.333253	0.0661216	0.0997088			13042019...50	0.00326019	0.0309874	0.0180244			13042019...50	0.113084	0.00348575	0.0263217
13042019...51	0.0326741	0.00678738	0.0104594			13042019...51	0	0.00231681	0.00139972			13042019...51	0.000854613	4.589e-05	0.000147209
15032019...sample15	0.0199229	0.00407053	0			15032019...sample15	0.00455279	0.00152646	0.00231076			15032019...sample15	0.0208354	0.0018917	0.0074428
15032019...sample17	0.18927	0.0287664	0.0753735			15032019...sample17	0.0168602	0.236514	0.0387898			15032019...sample17	0.316702	0.00632099	0.0681657
15032019...sample19	0.412631	0.05501	0.150719			15032019...sample19	0.0128402	0.135565	0.0405067			15032019...sample19	0.429811	0.0117309	0.0948249
15032019...sample2	0.253553	0.0758186	0.0817974			15032019...sample2	0.0122296	0.199586	0.0220324			15032019...sample2	0.297942	0.00595703	0.0435499
15032019...sample4	0.708746	0.0970505	0.194203			15032019...sample4	0.00223146	0.00708562	0.00945131			15032019...sample4	0.207628	0.00566762	0.0697456
15032019...sample5	0	0.00369585	0			15032019...sample5	0	0	0			15032019...sample5	0	0	0.00208102
15032019...sample6	0.124396	0.0199637	0.059486			15032019...sample6	0.00435402	0.0455832	0.0162348			15032019...sample6	0.215603	0.00331158	0.0652874
15032019...sample7	0.0569367	0.00602927	0.0167978			15032019...sample7	0.0166859	0.00291539	0.00676255			15032019...sample7	0.0228818	0.0113796	0.0722905
15032019...sample8	0.213256	0.0601604	0.159242			15032019...sample8	0.0278619	0.417195	0.0887835			15032019...sample8	0.113167	0.00448307	0.0202559
16042019...54	0.0412954	0.0115123	0.00307873			16042019...54	0.000992173	0.0160243	0.00323649			16042019...54	0.00474898	0	0.00170799
16042019...57	0.00984109	0.00957522	0.00389464			16042019...57	0.0015438	0.0165082	0.00286279			16042019...57	0.0246911	0.000419238	0.00633611
16042019...60	0.0372819	0.00876539	0.0066626			16042019...60	0.000660512	0.0091038	0.000750595			16042019...60	0.0162116	0.000253785	0.00405388
19032019...sample21	0	0	0			19032019...sample21	0	0.000105875	0.000609886			19032019...sample21	0	3.96124e-05	0.00131016
19032019...sample22	0	0	0			19032019...sample22	0.00189457	0.0120402	0.00123339			19032019...sample22	0.0228294	3.65451e-05	0.00475695
19032019...sample24	0.00851324	0.0186935	0.00679051			19032019...sample24	0.00816443	0.0925809	0.0135905			19032019...sample24	0.0982954	0.00333105	0.0210536
22042019...62	0.297208	0.0497018	0.0932404			22042019...62	0.000311902	0.00743095	0.015231			22042019...62	0.0286706	0.00100072	0.0072972
22042019...63	0.161664	0.00619952	0.0395399			22042019...63	0.00298936	0.023477	0.00757002			22042019...63	0.0457764	0.00103163	0.0139833
22042019...64	0.119357	0.0390645	0.0475671			22042019...64	0.00366399	0.0523126	0.0095952			22042019...64	0.0939193	0.0024949	0.0253518
22042019...65	0.117106	0.0271106	0.0196918			22042019...65	0.00237099	0.0243383	0.00778717			22042019...65	0.0941731	0.00237814	0.026958
22042019...66	0.441687	0.108034	0.135229			22042019...66	0.00158861	0.0165386	0.0219557			22042019...66	0.0434132	0.000424784	0.0123912
22042019...68	0.276217	0.053114	0.0928374			22042019...68	0.0453195	0.733204	0.0921582			22042019...68	0.157064	0.00422487	0.0610864
22042019...70	0.16446	0.0368779	0.0435027			22042019...70	0.0409372	0.724423	0.0912724			22042019...70	0.127293	0.0017236	0.0342529
01042019...Sample33	0.0319392	0.00944726	0.00949354			01042019...Sample33	0.0016482	0.0193916	0.00180316			01042019...Sample33	0.0215186	7.66768e-05	0.00410353
04042019...Sample34	0.0818054	0.0131648	0.0252948			04042019...Sample34	0.000798748	0.00705509	0.00087231			04042019...Sample34	0.0917001	0.00250643	0.0169444
04042019...Sample40	0.150648	0.0278526	0.0622388			04042019...Sample40	0.00432766	0.0666982	0.0133952			04042019...Sample40	0.130382	0.00116316	0.0273777
11042019...44	0	0	0			11042019...44	0	0	0			11042019...44	0	0	0
11042019...47_20190412132027	0	0	0			11042019...47_20190412132027	0	0	0			11042019...47_20190412132027	0	0	0
13042019...52	0.0156842	0.00994267	0			13042019...52	0.0020079	0.0431881	0.00560968			13042019...52	6.62957e-05	0.00026136	0.00230689
15032019...sample1	0.0199481	0.000761609	0.0127254			15032019...sample1	0.000141557	0.000426221	0.000504523			15032019...sample1	0.00473561	0.000105072	0.00271366
15032019...sample12	0.111401	0.012374	0.0507319			15032019...sample12	0.0127824	0.237439	0.028264			15032019...sample12	0.755011	0.01563	0.229359
15032019...sample13	0.127704	0.0202613	0.0355018			15032019...sample13	0.0089977	0.0952645	0.0239075			15032019...sample13	0.15978	0.00331101	0.039957
15032019...sample14	0.132774	0.0700045	0.0517249			15032019...sample14	0.0531459	0.853209	0.0936455			15032019...sample14	0.00531741	0.00213122	0.0207687
15032019...sample16	0.195183	0.0738086	0.0977053			15032019...sample16	0.00666855	0.0475337	0.0118534			15032019...sample16	0.499176	0.00728136	0.160543
15032019...sample18	0.0715401	0.0812372	0.0278167			15032019...sample18	0.0100641	0.0428703	0.0276435			15032019...sample18	0.0695102	0.00130667	0.0128994
15032019...sample3	0.489929	0.0970814	0.131983			15032019...sample3	0.00588496	0.0562958	0.0264145			15032019...sample3	0.690009	0.0141022	0.153766
16042019...55	0.0372741	0.011441	0.0120668			16042019...55	0.0016556	0.0249784	0.00561329			16042019...55	0.0894987	0.0024482	0.0215002
16042019...56	0.00253673	0.0149959	0			16042019...56	0.00884737	0.127347	0.0130526			16042019...56	0.000974588	0.00174719	0.000111553
19032019...sample20	0.0125901	0.0159084	0.00259161			19032019...sample20	0.00220404	0.0323091	0.00750474			19032019...sample20	0.062166	0.00120597	0.0116582
22042019...61	0.0494467	0.00996829	0.0118973			22042019...61	0.00261143	0.0379156	0.0101824			22042019...61	0.100226	0.00124623	0.028737
28032019...sample27	0	0	0			28032019...sample27	0	0	0			28032019...sample27	0.00575889	0	0.000357512
28032019...sample28	0.0143243	0.00889549	0.0040355			28032019...sample28	0.00222918	0.0282513	0.002548			28032019...sample28	0.0163901	0.000819064	0.00579425
28032019...sample29	1.74402e-10	1.23443e-08	0			28032019...sample29	0	0	0			28032019...sample29	0.00298721	0.000178806	0.00282234

## Sheet: EZR
K.QLFDQVVK.T [27, 34] (rank 2)					K.DNAMLEYLK.I [184, 192] (rank 3)						R.QLLTLSSELSQAR.D [529, 541] (rank 1)
	y5 - 588.3352+	y4 - 473.3082+	y3 - 345.2496+			y6 - 796.4273+	y5 - 665.3869+	y4 - 552.3028+				y10 - 1091.5691+	y8 - 877.4374+	y7 - 790.4054+
Replicate	Peak Area Normalized	Peak Area Normalized	Peak Area Normalized		Replicate	Peak Area Normalized	Peak Area Normalized	Peak Area Normalized			Replicate	Peak Area Normalized	Peak Area Normalized	Peak Area Normalized
Library	0.558085	0.277103	0.164811		Library	0.269662	0.529057	0.201281			Library	0.301154	0.516364	0.182482
01042019...Sample30_ARA1	0.101002	0.119804	0.0397023		01042019...Sample30_ARA1	0.241901	0.00652332	0.0244186			01042019...Sample30_ARA1	0.0078445	0.00980777	0.00529335
01042019...Sample31_ARA2	0.1286	0.110825	0.0510715		01042019...Sample31_ARA2	0.013423	0.0128676	0.032994			01042019...Sample31_ARA2	0.000356804	0.00116103	0.00150469
01042019...Sample32_ARA3	0.0921266	0.112637	0.0398767		01042019...Sample32_ARA3	0.060364	0.00221011	0.00646944			01042019...Sample32_ARA3	0.00249651	0.0091149	0.00494572
04042019...ARA4	0.132416	0.146468	0.0629082		04042019...ARA4	0.142191	0.00426866	0.0166172			04042019...ARA4	0.00925592	0.0186246	0.00832034
04042019...Sample35	0.0566502	0.0594431	0.0249126		04042019...Sample35	0.00299259	0.00107137	0.0534479			04042019...Sample35	0.00318532	0.00822973	0.00402095
04042019...Sample36	0.00834277	0.00551959	0.010179		04042019...Sample36	0.0031069	0.00586088	0.002919			04042019...Sample36	0.00133098	0.0053697	0.00301657
04042019...Sample37	0.11036	0.0576569	0.0428093		04042019...Sample37	0.130641	0.00576233	0.0198446			04042019...Sample37	0.0017754	0.00831661	0.00586545
04042019...Sample38	0.0843082	0.0487819	0.0372602		04042019...Sample38	0.163026	0.0036413	0.0196583			04042019...Sample38	0.00536915	0.0134778	0.00381055
04042019...Sample39	0.137046	0.0809761	0.0384743		04042019...Sample39	0.136897	0.00313197	0.0149022			04042019...Sample39	0.0108824	0.0171259	0.00625468
11042019...45	0	0	0		11042019...45	0	0	0			11042019...45	0	0	0
11042019...48	0	0	0		11042019...48	0	0	0			11042019...48	0	0	0
11042019...49	0.0262997	0.0161036	0.011389		11042019...49	0.171195	0.00426762	0.0199617			11042019...49	0.000252137	0.00241764	0
13042019...50	0.267656	0.130976	0.0715805		13042019...50	0.312995	0.00839962	0.0300406			13042019...50	0.0157163	0.0297678	0.0123778
13042019...51	0.00201381	0.00133181	0.000630905		13042019...51	0.129673	0.00241376	0.014012			13042019...51	0	0	0
15032019...sample15	0.0103965	0.0172498	0.00824869		15032019...sample15	0.767381	0.0171262	0.0412182			15032019...sample15	0.0181561	0.00477397	0.00294777
15032019...sample17	0.219125	0.230407	0.0832815		15032019...sample17	0.893515	0.0165087	0.0899764			15032019...sample17	0.0786905	0.122742	0.0668388
15032019...sample19	0.438132	0.225037	0.152452		15032019...sample19	0.0380497	0.0460496	0.0265046			15032019...sample19	0.219168	0.531506	0.249326
15032019...sample2	0.131406	0.12328	0.0543658		15032019...sample2	0.187915	0.00414892	0.0133749			15032019...sample2	0.0179611	0.0324197	0.017679
15032019...sample4	0.2897	0.128571	0.0694918		15032019...sample4	0.633554	0.0127505	0.055742			15032019...sample4	0.0115375	0.0202094	0.00993278
15032019...sample5	0.0502795	0.0451291	0.0201913		15032019...sample5	0.0131104	0.000205076	0.00140764			15032019...sample5	0	0	0
15032019...sample6	0.208171	0.0935666	0.0499482		15032019...sample6	0.32868	0.00901506	0.0428141			15032019...sample6	0.140093	0.248512	0.0970701
15032019...sample7	0.227542	0.22934	0.127153		15032019...sample7	0.273784	0.167136	0.036198			15032019...sample7	0.0282483	0.0630196	0.020297
15032019...sample8	0.0725606	0.0402482	0.0279346		15032019...sample8	0.0108463	0.0136233	0.00565993			15032019...sample8	0.147938	0.244285	0.0911788
16042019...54	0.0350263	0.0304936	0.0121582		16042019...54	0.0951279	0.0026103	0.00970793			16042019...54	0.00337321	0.00730009	0.00198158
16042019...57	0.061522	0.0248836	0.0199259		16042019...57	0.0829895	0.00204459	0.0101857			16042019...57	0.00337101	0.00690665	0.00273774
16042019...60	0.0990877	0.04653	0.035		16042019...60	0.00519191	0.006706	0.00325411			16042019...60	0.00752073	0.0183621	0.00737071
19032019...sample21	0.00993094	0.0115927	0.00711892		19032019...sample21	0.0413131	0.000566528	0.00512221			19032019...sample21	0	0	0
19032019...sample22	0.0112503	0.00726538	0.00257835		19032019...sample22	0.00334462	0.00529014	0.00336972			19032019...sample22	0.00416797	0.0158036	0.00265581
19032019...sample24	0.0185031	0.021668	0.0141538		19032019...sample24	0.110213	0.00801644	0.0388483			19032019...sample24	0.00531632	0.0167569	0.00826514
22042019...62	0.228593	0.0976048	0.055341		22042019...62	0.264591	0.00666872	0.030065			22042019...62	0.014012	0.0236247	0.0103602
22042019...63	0.223406	0.101502	0.0763104		22042019...63	0.247674	0.00516899	0.0261442			22042019...63	0.00963426	0.0149065	0.00737244
22042019...64	0.369761	0.197929	0.0820987		22042019...64	0.308578	0.00861679	0.0354697			22042019...64	0.0374524	0.0747708	0.0283321
22042019...65	0.184497	0.103528	0.0516689		22042019...65	0.260003	0.00603692	0.0326666			22042019...65	0.00937976	0.0209026	0.00894269
22042019...66	0.147102	0.0787482	0.0541408		22042019...66	0.191321	0.0066468	0.0265947			22042019...66	0.0294792	0.0583796	0.0236195
22042019...68	0.517318	0.250423	0.169288		22042019...68	0.0149212	0.00513459	0.334624			22042019...68	0.237175	0.444521	0.162294
22042019...70	0.523157	0.290029	0.186814		22042019...70	0.0134023	0.00349241	0.304607			22042019...70	0.134712	0.289931	0.10478
01042019...Sample33	0.070545	0.0276765	0.0151982		01042019...Sample33	0.12747	0.00355942	0.0159814			01042019...Sample33	0.00143269	0.00744146	0.00272126
04042019...Sample34	0.0609158	0.0459873	0.0291857		04042019...Sample34	0.108873	0.00249301	0.0126092			04042019...Sample34	0.00211866	0.00693843	0.00283572
04042019...Sample40	0.410755	0.199724	0.112044		04042019...Sample40	0.00978937	0.01187	0.00604493			04042019...Sample40	0.0637418	0.0977077	0.0392146
11042019...44	0	0	0		11042019...44	0	0	0			11042019...44	0	0	0
11042019...47_20190412132027	0	2.73234e-09	0		11042019...47_20190412132027	0	0	0			11042019...47_20190412132027	0	0	0
13042019...52	0.0253905	0.0137472	0.0093228		13042019...52	0.180841	0.00421541	0.0195861			13042019...52	0	0.00100782	0
15032019...sample1	0.00916336	0.00797216	0.0105416		15032019...sample1	0.00412541	0.00593827	0.00256389			15032019...sample1	0.00223532	0.0083221	0.00253376
15032019...sample12	0.166296	0.0789983	0.0443698		15032019...sample12	0.0195298	0.0323158	0.013296			15032019...sample12	0.198599	0.440187	0.180989
15032019...sample13	0.135976	0.167767	0.0663337		15032019...sample13	0.21122	0.00421164	0.0225485			15032019...sample13	0.0296127	0.0518471	0.0226149
15032019...sample14	0.113568	0.0507075	0.0756391		15032019...sample14	0.00633041	0.00663969	0.00228885			15032019...sample14	0.0374148	0.0606133	0.0163999
15032019...sample16	0.0341031	0.0835878	0.0339704		15032019...sample16	0.783822	0.015078	0.0483692			15032019...sample16	0.0329811	0.130593	0.073671
15032019...sample18	0.0882379	0.175847	0.0671755		15032019...sample18	0.572713	0.0108655	0.0526792			15032019...sample18	0.0485891	0.104974	0.0321589
15032019...sample3	0.160629	0.0872583	0.0787851		15032019...sample3	0.334693	0.0112438	0.0462665			15032019...sample3	0.0559325	0.0768896	0.0261171
16042019...55	0.143315	0.0743283	0.0440692		16042019...55	0.00256805	0.00337894	0.00210468			16042019...55	0.00845792	0.0137141	0.00698203
16042019...56	0.00588306	0.343545	0.0806726		16042019...56	0.0899948	0.00234374	0.0104536			16042019...56	0	0	0.000149579
19032019...sample20	0.0631162	0.0845015	0.0323162		19032019...sample20	0.0559512	0.00141223	0.00640804			19032019...sample20	0.00273382	0.005523	0.00154239
22042019...61	0.47708	0.246615	0.132829		22042019...61	0.006881	0.013009	0.0051011			22042019...61	0.075921	0.134171	0.0478712
28032019...sample27	0.013242	0.00748907	0.00482021		28032019...sample27	0.0290689	0.000129748	0.00255321			28032019...sample27	0	0	0
28032019...sample28	0.0645516	0.0409216	0.0193306		28032019...sample28	0.0900098	0.00241986	0.0121972			28032019...sample28	0.00912514	0.0156762	0.00791122
28032019...sample29	0.00745032	0.00471381	0.00255903		28032019...sample29	0.0216809	0.00122165	0.00506012			28032019...sample29	0	0.0019237	0.000605208

## Sheet: ILK
R.SVMIDEDMTAR.I [323, 333] (rank 3)							R.EVPFADLSNMEIGMK.V [388, 402] (rank 2)						K.FDMIVPILEK.M [438, 447] (rank 1)
		y8 - 950.4248+	y7 - 837.3407+	y6 - 722.3138+				y11 - 1208.5650+	y10 - 1137.5279+	y8 - 909.4168+				y6 - 698.4447+	y5 - 599.3763+	y3 - 389.2395+
Replicate		Peak Area Normalized	Peak Area Normalized	Peak Area Normalized			Replicate	Peak Area Normalized	Peak Area Normalized	Peak Area Normalized			Replicate	Peak Area Normalized	Peak Area Normalized	Peak Area Normalized
Library		0.250765	0.487146	0.262088			Library	0.34544	0.270293	0.384267			Library	0.254655	0.541442	0.203902
01042019...Sample30_ARA1	ARA	0.00464938	0.0144102	0.00915705	0.0282166		01042019...Sample30_ARA1	0	0.0362378	0.00138692	0.0376247		01042019...Sample30_ARA1	0.0161701	0.0165858	0.00467597	0.0374319
01042019...Sample31_ARA2	ARA	0.0169744	0.0113074	0.00774029	0.0360221		01042019...Sample31_ARA2	0	0.0171086	0.0259965	0.0431052		01042019...Sample31_ARA2	0.0344501	0.0340211	0.0134532	0.0819244
01042019...Sample32_ARA3	ARA	0.00169364	0.00558115	0.00256657	0.00984136		01042019...Sample32_ARA3	0.00295595	0	0	0.00295595		01042019...Sample32_ARA3	0.00381017	0.00608133	0.0293188	0.0392103
04042019...ARA4	ARA	0.000206279	0.0048522	0.00266145	0.00771992		04042019...ARA4	0	0.0300685	0.000606752	0.0306753		04042019...ARA4	0.0255071	0.0245162	0.00411039	0.0541337
04042019...Sample35	MGI	0.00169761	0.0047408	0.0101361	0.0165745		04042019...Sample35	0.0168202	0.00066299	0.00870432	0.0261875		04042019...Sample35	0.0258109	0.0147568	0.00337327	0.043941
04042019...Sample36	MGI	0.000681877	0.00437539	0.000161766	0.00521903		04042019...Sample36	0	0	0.0862152	0.0862152		04042019...Sample36	0.00482479	0.00524463	0.00801543	0.0180849
04042019...Sample37	MGI	0.000997742	0.00306434	0.00257984	0.00664192		04042019...Sample37	0	0	0.0290078	0.0290078		04042019...Sample37	0.03238	0.0346762	0.0103197	0.0773759
04042019...Sample38	MGI	0.00871978	0.00204727	0.00228345	0.0130505		04042019...Sample38	0.0178919	0	0.0114671	0.029359		04042019...Sample38	0.0214408	0.0202928	0.00616142	0.047895
04042019...Sample39	MGI	0.00066256	0.0155136	0.00479589	0.020972		04042019...Sample39	9.49137e-09	0.0245844	0	0.0245844		04042019...Sample39	0.015727	0.0143893	0.00142811	0.0315444
11042019...45	MGI	0	0	0	0		11042019...45	0	0	0	0		11042019...45	0	0	0	0
11042019...48	MGI	0	0	0	0		11042019...48	0	0	0	0		11042019...48	0	0	0	0
11042019...49	MGI	0	0.00391299	0	0.00391299		11042019...49	0	0	0	0		11042019...49	0.00198102	0.00274639	0	0.00472742
13042019...50	MGI	0.000855357	0.110183	0.00829839	0.119337		13042019...50	0.0158353	0.000798591	0.0174504	0.0340843		13042019...50	0.0404828	0.0501461	0.00947496	0.100104
13042019...51	MGI	0	0.00138559	0	0.00138559		13042019...51	0	0	0	0		13042019...51	0	0	0.000783636	0.000783636
15032019...sample15	MGI	0.00243813	0.00221186	0.00565651	0.0103065		15032019...sample15	0.0478122	0.112651	0.0330533	0.193517		15032019...sample15	0.029084	0.0432006	0.0151261	0.0874107
15032019...sample17	MGI	0.0345799	0.0820995	0.0206404	0.13732		15032019...sample17	0.0625787	0.0808056	0.0952137	0.238598		15032019...sample17	0.0464201	0.0543284	0.137997	0.238745
15032019...sample19	MGI	0.03047	0.0469267	0.00678358	0.0841803		15032019...sample19	0.365727	0.251182	0.383091	1		15032019...sample19	0.298041	0.303487	0.0480004	0.649528
15032019...sample2	MGI	0.0125755	0.0707601	0.0570885	0.140424		15032019...sample2	0.0236367	0.0391244	0.00723894	0.07		15032019...sample2	0.0405353	0.0547508	0.00682106	0.102107
15032019...sample4	MGI	0.0159699	0.0278077	0.00860826	0.0523859		15032019...sample4	0.0285628	0.0648568	0.034932	0.128352		15032019...sample4	0.0230196	0.0357114	0.00519002	0.0639211
15032019...sample5	MGI	0.000243097	0	0	0.000243097		15032019...sample5	0	0	0	0		15032019...sample5	0	0	0.00123114	0.00123114
15032019...sample6	MGI	0.00355247	0.00611606	0.00398098	0.0136495		15032019...sample6	0.299201	0.118502	0.128155	0.545858		15032019...sample6	0.0260376	0.0247663	0.0800781	0.130882
15032019...sample7	MGI	0.0508697	0.0308334	0.0185375	0.100241		15032019...sample7	0.0638213	0.0805335	0.133766	0.278121		15032019...sample7	0.0867339	0.110484	0.0420141	0.239232
15032019...sample8	MGI	0.0415081	0.0212561	0.0162068	0.078971		15032019...sample8	0.0172806	0.0285673	0.0332805	0.0791283		15032019...sample8	0.018981	0.0265913	0.0357361	0.0813084
16042019...54	MGI	0	8.07987e-05	0.000767444	0.000848242		16042019...54	0	0	0	0		16042019...54	0.00081311	0.00127721	0	0.00209033
16042019...57	MGI	4.19893e-05	0.000616639	0.000214199	0.000872827		16042019...57	0	0	0	0		16042019...57	0.00637879	0.00892928	0.0031489	0.018457
16042019...60	MGI	0.00132048	0.059102	0.00219367	0.0626162		16042019...60	0	0	0.00686846	0.00686846		16042019...60	0.018516	0.022584	0.00661881	0.0477189
19032019...sample21	MGI	0	0	0	0		19032019...sample21	0	0	0	0		19032019...sample21	0	0.00109134	8.22255e-09	0.00109135
19032019...sample22	MGI	0.00430322	0.00662267	0.00143209	0.012358		19032019...sample22	0	4.11071e-08	0	4.11071e-08		19032019...sample22	0.00324741	0.00411384	0.00989599	0.0172572
19032019...sample24	MGI	0.0191091	0.0627959	0.025163	0.107068		19032019...sample24	0.0117742	0.0281683	0.089642	0.129585		19032019...sample24	0.00934209	0.00846717	0.0142493	0.0320586
22042019...62	MGI	0.00451337	0.00973266	0.00421553	0.0184616		22042019...62	0.0453096	0.0910538	0.0825266	0.21889		22042019...62	0.0612393	0.0718449	0.0181529	0.151237
22042019...63	MGI	0.00337532	0.00339921	0.000729713	0.00750424		22042019...63	0.021625	0.00305905	0.0090838	0.0337678		22042019...63	0.0296796	0.0317363	0.00895352	0.0703694
22042019...64	MGI	0.0142074	0.00931864	0.00495788	0.0284839		22042019...64	0.00234704	3.75714e-08	0.000603543	0.00295062		22042019...64	0.0274314	0.035585	0.0104292	0.0734456
22042019...65	MGI	0.00158277	0.013695	0.00145663	0.0167344		22042019...65	0.00436346	0.0884468	0.0106131	0.103423		22042019...65	0.0502589	0.0744121	0.0168786	0.14155
22042019...66	MGI	0.00812907	0.0262794	0.00454523	0.0389537		22042019...66	0.0152921	0.00699082	0.00938273	0.0316656		22042019...66	0.0141141	0.0283093	0.0197356	0.0621591
22042019...68	MGI	0.140123	0.42639	0.177561	0.744074		22042019...68	0.0662937	0.0240008	0.0749215	0.165216		22042019...68	0.0521411	0.0417599	0.0147995	0.108701
22042019...70	MGI	0.0176701	0.0184795	0.00974694	0.0458965		22042019...70	0.0151393	0.0163021	0.0146659	0.0461073		22042019...70	0.0473576	0.060069	0.0547978	0.162224
01042019...Sample33	MGII	0.000351005	0	0.000472492	0.000823497		01042019...Sample33	0	0	0	0		01042019...Sample33	0.00287325	0.00677506	0.00136087	0.0110092
04042019...Sample34	MGII	0.00123606	0.00269947	0.000935022	0.00487056		04042019...Sample34	0	0.00287548	0	0.00287548		04042019...Sample34	0.00697809	0.00977889	0.0027443	0.0195013
04042019...Sample40	MGII	0.00170748	0.00562229	0.0023744	0.00970417		04042019...Sample40	0.0104495	0.000959749	0.00507157	0.0164808		04042019...Sample40	0.0287086	0.0435037	0.00619584	0.0784081
11042019...44	MGII	0	0	0	0		11042019...44	0	0	0	0		11042019...44	0	0	0	0
11042019...47_20190412132027	MGII	0	0	0	0		11042019...47_20190412132027	0	0	0	0		11042019...47_20190412132027	0	0	0	0
13042019...52	MGII	0.000407817	0.00106423	3.148e-05	0.00150352		13042019...52	0	0	0	0		13042019...52	0.0111481	0.0147515	0.00322998	0.0291295
15032019...sample1	MGII	0.00432726	0	0	0.00432726		15032019...sample1	0.0200479	0.00477286	0.0337181	0.0585388		15032019...sample1	0.0114626	0.0127365	0.000507858	0.024707
15032019...sample12	MGII	0.0897521	0.121558	0.0177053	0.229015		15032019...sample12	0.259575	0.275213	0.218016	0.752804		15032019...sample12	0.475378	0.430834	0.0937881	1
15032019...sample13	MGII	0.0104354	0.00820931	0.00864529	0.02729		15032019...sample13	0.0831701	0.0578612	0.104361	0.245392		15032019...sample13	0.0605206	0.0803827	0.0423139	0.183217
15032019...sample14	MGII	0.385059	0.509499	0.105442	1		15032019...sample14	0.042633	0.0474489	0.133977	0.224059		15032019...sample14	0.127932	0.186708	0.0870942	0.401735
15032019...sample16	MGII	0.0496102	0.190578	0.020988	0.261176		15032019...sample16	0.0460916	0.0427425	0.106813	0.195647		15032019...sample16	0.111322	0.105389	0.0159818	0.232692
15032019...sample18	MGII	0.00988195	0.0437239	0.0304096	0.0840154		15032019...sample18	0.0993768	0.284368	0.375461	0.759206		15032019...sample18	0.019914	0.026198	0.0284774	0.0745894
15032019...sample3	MGII	0.00159501	0.00855192	0.00621898	0.0163659		15032019...sample3	0.0521499	0.0635342	0.0374798	0.153164		15032019...sample3	0.0195737	0.0171477	0.0492748	0.0859961
16042019...55	MGII	0.000222389	0.00708216	0.00155617	0.00886072		16042019...55	0	0	0.0125021	0.0125021		16042019...55	0.026632	0.0322385	0.00778942	0.0666599
16042019...56	MGII	0.0288342	0.0488475	0.0072122	0.0848939		16042019...56	0	0	3.44016e-08	3.44016e-08		16042019...56	0.0091426	0.00968478	0.00153546	0.0203628
19032019...sample20	MGII	0.000231339	0.00204451	0.00519482	0.00747067		19032019...sample20	0	0.00767044	0.00316233	0.0108328		19032019...sample20	0.0053744	0.00131175	0.00330412	0.00999027
22042019...61	MGII	0.00996656	0.0139937	0.00293131	0.0268916		22042019...61	0.0195988	0.0291785	0.0454576	0.0942349		22042019...61	0.065837	0.0792364	0.0216678	0.166741
28032019...sample27	MGII	0	0	0.000118416	0.000118416		28032019...sample27	0	0	0	0		28032019...sample27	0	0.000452125	0.000894297	0.00134642
28032019...sample28	MGII	0.0012883	0.00274996	0.00299427	0.00703254		28032019...sample28	0	0	0	0		28032019...sample28	0.0095162	0.011368	0.00279849	0.0236827
28032019...sample29	MGII	0	0.00597812	0.00245611	0.00843423		28032019...sample29	0	0	0	0		28032019...sample29	0.00631596	0.0076117	0.00292576	0.0168534

## Sheet: ANXA2_MRM_INPUT
Category	S1	S2	S3	S4	S5	S6	S7	S8	S9	S10	S11	S12	S13	S14	S15	S16	S17	S18	S19	S20	S21	S22	S23	S24	S25	S26	S27	S28	S29	S30	S31	S32	S33	S34	S35	S36	S37	S38	S39	S40	S41	S42	S43	S44	S45	S46	S47	S48	S49
Peptides	ARA	ARA	ARA	ARA	MGI	MGI	MGI	MGI	MGI	MGI	MGI	MGI	MGI	MGI	MGI	MGI	MGI	MGI	MGI	MGI	MGI	MGI	MGI	MGI	MGI	MGI	MGI	MGI	MGI	MGI	MGI	MGI	MGI	MGI	MGI	MGI	MGI	MGII	MGII	MGII	MGII	MGII	MGII	MGII	MGII	MGII	MGII	MGII	MGII
K.AYTNFDAER.D	0.0354315	0.00330423	0.0294235	0.00816179	0.0530579	0.00553508	0.0261312	0.0703286	0.0017993	0.000760098	0.00731203	0.0227004	0.00337186	0.0168638	0.447937	0.0789699	0.357163	0.157827	9.98887e-05	0.139116	0.00115756	0.171858	0.00764023	0.0503775	0.0165076	0.00624536	0.017649	0.0208596	0.0374509	0.000116876	0.0643521	0.0645293	0	9.1907e-05	0.00151544	0.00692622	0.0107415	0.0408045	0.103637	0.00125734	0.0661251	0.00229444	0.0903338	0.0483293	0.765521	0.307609	0.114622	0.299084	0.137952
R.QDIAFAYQR.R	0.0359163	0.00241357	0.0114503	0.00879765	0.0294845	0.00818952	0.0200605	0.0657778	0.00322765	0.00034632	0.00232007	3.97255e-05	0.00423232	0.0301977	0.40933	0.0908623	0.310897	0.198888	2.11218e-06	0.152345	0.0246595	0.164298	0.0103758	0.0524268	0.0233795	0.0143266	0.0336086	0.0324418	0.0649375	8.33402e-05	0.0745909	0.0759069	0	5.62404e-05	0.0023737	0.0164416	0.010033	0.0947777	0.087514	0.000256098	0.0398378	0.00293784	0.122195	0.093698	0.882018	0.296591	0.0516588	0.326891	0.0701377
K.TPAQYDASELK.A	0.0251767	0.00210475	0.0238652	0.0102862	0.0419895	0.089366	0.0158634	0.0461647	0.0142342	0.00113984	0.00460855	0.0148415	0.00225184	0.0226423	0.350108	0.101642	0.244276	0.158819	2.1961e-05	0.0953563	0.0370461	0.201139	0.00655107	0.0282597	0.0141923	0.00644272	0.0123995	0.0108189	0.0206698	0.000864723	0.0400628	0.0431824	0	0.000286247	0.00123801	0.00476861	0.00603125	0.0912501	0.0684524	0.000714112	0.0434819	0.00191345	0.0687181	0.192661	0.537027	0.182189	0.0923776	0.224588	0.0826268
[truncated: 9 more columns]

## Sheet: FUS Protein_MRM
Category	S35_SKB	S36_SKB	S37_SKB	S39_SKB	S40_SKB	S44_SKB	S45_SKB	S46_SKB	S47_SKB	S53_SKB	S8_SKB	S54_SKB	S57_SKB	S13_SKB	S17_SKB	S20_SKB	S22_SKB	S64_SKB	S68_SKB	S70_SKB	S25_SKB	S28_SKB	S33_SUPRA	S34_SUPRA	S38_SUPRA	S48_SUPRA	S50_SUPRA	S52_SUPRA	S3_SUPRA	S4_SUPRA	S6_SUPRA	S7_SUPRA	S55_SUPRA	S56_SUPRA	S60_SUPRA	S12_SUPRA	S14_SUPRA	S15_SUPRA	S18_SUPRA	S19_SUPRA	S23_SUPRA	S62_SUPRA	S63_SUPRA	S65_SUPRA	S66_SUPRA	S67_SUPRA	S26_SUPRA	S27_SUPRA	S29_SUPRA
Peptides	SKB	SKB	SKB	SKB	SKB	SKB	SKB	SKB	SKB	SKB	SKB	SKB	SKB	SKB	SKB	SKB	SKB	SKB	SKB	SKB	SKB	SKB	SUPRA	SUPRA	SUPRA	SUPRA	SUPRA	SUPRA	SUPRA	SUPRA	SUPRA	SUPRA	SUPRA	SUPRA	SUPRA	SUPRA	SUPRA	SUPRA	SUPRA	SUPRA	SUPRA	SUPRA	SUPRA	SUPRA	SUPRA	SUPRA	SUPRA	SUPRA	SUPRA
K.TGQPMINLYTDR.E	0.0729899	0.0805072	0.0135401	0.00551541	0.0540142	0.00650518	0.016706	0.0112199	0	0.0663395	1	0.0141154	0.00262727	0.281772	0.0383848	0.0701799	0.0415134	0	0.0689526	0.0600744	0.00288263	0.0292018	0.0719565	0.0594757	0.0982579	0.012551	0.00240266	0.0050144	0.118322	0.40913	0.116906	0.882098	0.0713334	0.0302457	0.0747288	0.341547	0.0540036	0.0638898	0.330727	0.550887	0.166609	0.165017	0.0174001	0.0926279	0.0517855	0.0165657	0.0118035	0.13281	0.757829
K.GEATVSFDDPPSAK.A	0.136522	0.0769674	0.0271602	0.119062	0.0932451	0.0199407	0.0221221	0.0129284	0.0156233	0.113704	1	0.0527628	0.0180372	0.106578	0.0950489	0.0385245	0.0147116	0.0166818	0.134934	0.0692327	0.0463249	0.0452929	0.145728	0.0726561	0.0711923	0.0012813	0.00690889	0.00580863	0.31738	0.345207	0.34833	0.233314	0.0568386	0.019114	0.0160274	0.40486	0.0639729	0.0107571	0.16429	0.137148	0.0164159	0.0275549	0.0304532	0.0656086	0.299525	0.0745686	0.00969629	0.120088	0.408813
K.AAIDWFDGK.E	0.281138	0.0759812	0.140047	0.375411	0.230437	0.0365122	0.0189304	0.0538404	0.00581265	0.238075	0.695087	0.121785	0.116163	0.701023	0.462806	0.241979	0.0203928	0.043335	0.420977	0.301286	0.00177225	0.236851	0.366717	0.0234165	0.268619	0.00402794	0.0139337	0.0328559	0.0452626	0.676964	0.719351	0.262003	0.30564	0.141205	0.0731071	1	0.0483851	0.108148	0.452377	0.299799	0.127355	0.00208843	0.0207664	0.522356	0.503626	0.255017	0.0356828	0.374863	0.890657

## Sheet: VIM METABOANALYST
Category	S1	S2	S3	S4	S5	S6	S7	S8	S9	S10	S11	S12	S13	S14	S15	S16	S17	S18	S19	S20	S21	S22	S23	S24	S25	S26	S27	S28	S29	S30	S31	S32	S33	S34	S35	S36	S37	S38	S39	S40	S41	S42	S43	S44	S45	S46	S47	S48	S49
Peptides	ARA	ARA	ARA	ARA	MGI	MGI	MGI	MGI	MGI	MGI	MGI	MGI	MGI	MGI	MGI	MGI	MGI	MGI	MGI	MGI	MGI	MGI	MGI	MGI	MGI	MGI	MGI	MGI	MGI	MGI	MGI	MGI	MGI	MGI	MGI	MGI	MGI	MGII	MGII	MGII	MGII	MGII	MGII	MGII	MGII	MGII	MGII	MGII	MGII
R.DNLAEDIMR.L	0.0369838	0.00225611	0.100425	0.00931283	0.0150847	0.12619	0.0130655	0.0163367	0.00509727	0.000134515	3.45929e-05	1.25797e-05	0.0285041	0.125856	0.254375	0.355634	0.108999	0.891949	0.000120704	0.0529662	0.108106	0.422187	0.0176401	0.0769093	0.087121	0.283149	0.0199999	0.0518045	0.0148013	0.00682171	0.0191679	0.0107786	0	5.37143e-05	0.049782	0.00215034	0.00335255	0.0663619	0.0922638	0.000222926	0.0595426	0.00650327	0.0466002	0.657345	0.309976	0.550978	0.0270963	0.369773	0.00160117
K.LQEEMLQR.E	0.0541638	0.00394493	0.0892392	0.0157867	0.0325756	0.0338879	0.0259761	0.0307093	0.0206528	0.000618877	0.00609927	0.0122157	0.0444673	0.085033	0.364186	0.366284	0.196133	1	0.00109217	0.0499869	0.0564523	0.520589	0.0267165	0.0901499	0.0963225	0.299625	0.0221192	0.0569204	0.0194801	7.37935e-05	0.0287995	0.0201684	0	0.000395825	0.00802239	0.000865906	0.0139832	0.0450076	0.143095	0.00509126	0.15334	0.0107493	0.0561121	0.491585	0.330693	0.585589	0.0386927	0.412734	0.00545804
R.QDVDNASLAR.L	0.134959	0.0120761	0.0500349	0.028031	0.0318413	0.032264	0.0555218	0.0566645	0.00660174	0.00181746	0.0135961	0.0394216	0.0472901	0.0973681	1	0.341201	0.34093	0.551206	0.0104238	0.330224	0.0701744	0.472569	0.0967132	0.201544	0.0573176	0.0909471	0.0243432	0.0827641	0.0165368	0.0724591	0.08817	0.0674896	0	0.00355758	0.105829	0.00965803	0.00674703	0.0686051	0.187413	0.00243935	0.0501016	0.0037745	0.0774098	0.558663	0.226904	0.606666	0.0478323	0.46652	0.0199461
[truncated: 9 more columns]

[truncated: 1 more sheets: ILK_MRM Analysis]
