# Supplementary material for: Comprehending Meningioma Signaling Cascades Using Multipronged Proteomics Approaches & Targeted Validation of Potential Markers
Source: Front Oncol. 2020 Aug 26;10:1600. doi: 10.3389/fonc.2020.01600 (PMC7482667; doi:10.3389/fonc.2020.01600)
Supplement: Supplementary file 11 [file Data_Sheet_2.docx]

Supplementary Material

**Multipronged proteomic analysis of meningiomas provide cues to the interplay of Integrin & PI3K-Akt pathway components**

Shuvolina Mukherjee1, Deeptarup Biswas1, Rucha Gadre1, Pooja Jain2, Nelofer Syed3, Julianna Stylianou3, Qingyu Zeng3, Anita Mahadevan4, Sridhar Epari 5, Prakash Shetty6, Aliasgar Moiyadi6, Graham Roy Ball7, Sanjeeva Srivastava1*

1Proteomics Lab, Department of Biosciences & Bioengineering, IIT Bombay, Mumbai, 400076, Maharashtra, India

2Centre for Integrative Systems Biology and Bioinformatics (CISBIO), Sir Ernst Chain Building, Department of Life Sciences, Imperial College London, London SW7 2AZ, UK

3Division of Brain Sciences, Department of Medicine, Imperial College London, Hammersmith Hospital Campus, Burlington Danes Building, London W12 0NN, UK

4Department of Neuropathology, Human Brain Tissue Repository (Brain Bank), NIMHANS, Bangalore- 5600029, India

5Department of Pathology, Tata Memorial Centre, Mumbai, Dr. E Borges Road, Parel, Mumbai - 400 012, India

6Department of Neurosurgery, Tata Memorial Centre, Mumbai, Dr. E Borges Road, Parel, Mumbai - 400 012, India

7School of Science and Technology, Nottingham Trent University, Clifton Lane, Nottingham, NG11 8NS, UK

*** Correspondence:**

Sanjeeva Srivastava

[sanjeeva@iitb.ac.in](mailto:sanjeeva@iitb.ac.in)

**Details of Supplementary Data Tables**

| **Data** | **Content** |
| --- | --- |
| **Supplementary Data 1** | **Clinical Information** |
| **Supplementary Data 2** | **Label-Free Proteomics Outcomes, Proteome Discoverer 2.0 Analysis** |
| **Supplementary Data 3** | **ANOVA Analysis & Grade-wise statistics** |
| **Supplementary Data 4** | **A. GSEA analysis of ANOVA pass proteins**  **B. Low grade vs High-Grade Interactions (ANN Analysis)** |
| **Supplementary Data 5** | **MGI vs MGII GSEA analysis** |
| **Supplementary Data 6** | **Phosphoproteomics data & Kinome Analysis Input files** |
| **Supplementary Data 7** | **Comparison with published proteomics datasets** |
| **Supplementary Data 8** | **RT2 PCR Analysis** |
| **Supplementary Data 9** | **A. Grade-specific proteins**  **B. Pathway component analysis** |

All Supplemtary files have been uploaded in google drive link due to large file size.

https://drive.google.com/open?id=1UXQ3lemv-XynDdpRMLyaiV02yaVxs0YF
